# Supplementary material for: Mediator kinase inhibition suppresses hyperactive interferon signaling in Down syndrome
Source: bioRxiv preprint, doi:10.1101/2023.07.05.547813, version 4 (2024-11-20)
Supplement: Fig1_sourceData1 [file 547813_file02.xlsx]

## Sheet: Data Key
Tab	Corresponding Figure	Details
Gene Expression-DESeq2 dataset1	All gene expression analysis of D21 and Sibling T21 with 4 hrs ±IFNγ stimulation, ±CA pretreatment	DESeq2 output detailing log2FC and adjusted p-value for all genes across comparisons. Comparisons with "T21 vs D21" in the title are cross-genotype and each gene is normalized to ploidy. "T21vsD21_IFN" is analysis to identify genes with a higher or lower than expected response to IFN treatment in T21 cells relative to D21.
Whole Blood RNAseq	Figure 1_S2C-D	DESeq2 output from patient-derived whole blood samples, contrasting gene expression in patients with and without Down syndrome. Also contains table with cohort information of the patients from which the whole blood samples were taken.
Gene Expression-DESeq2 dataset2	Gene expression analysis of Non-Sibling T21 at 4.5 hrs ±CA	DESeq2 output detailing log2FC and adjusted p-value for all genes across comparison of Non-Sibling T21 cell line treated for 4.5 hours with cortistatin A relative to vehicle
Gene Expression-DESeq2 dataset3	Gene expression analysis of Sibling T21 at 24 hrs ±CA	DESeq2 output detailing log2FC and adjusted p-value for all genes across comparison of Sibling T21 cell line treated for 24 hours with cortistatin A relative to vehicle

## Sheet: Gene Expression-DESeq2 dataset1
GeneID	TranscriptID	BaseMean	D21 IFNvsCtrl log2FC	D21 IFNvsCtrl padj	D21 CAvsCtrl log2FC	D21 CAvsCtrl padj	D21 CAIFNvsIFN log2FC	D21 CAIFNvsIFN padj	D21 CAIFNvsCA log2FC	D21 CAIFNvsCA padj	T21 IFNvsCtrl log2FC	T21 IFNvsCtrl padj	T21 CAvsCtrl log2FC	T21 CAvsCtrl padj	T21 CAIFNvsIFN log2FC	T21 CAIFNvsIFN padj	T21 CAIFNvsCA log2FC	T21 CAIFNvsCA padj	T21vsD21 log2FC	T21vsD21 padj	T21vsD21_IFN log2FC	T21vsD21_IFN padj
44621	NM_022746	339.278	-0.16177	0.870942	0.0578834	0.967449	-0.017537	0.988238	-0.237191	1	-0.113723	0.934022	0.290332	0.795454	0.385203	0.807459	-0.0188517	0.999179	-2.98026	6.84e-13	0.0484108	0.989831
44622	NM_001317338	1236.94	-0.113992	0.868433	0.0892327	0.926374	0.152456	0.801091	-0.0507686	1	0.0108256	0.991994	0.0870746	0.9271	0.0596491	0.97708	-0.0165998	0.999179	-2.66177	3.05e-21	0.125143	0.948371
44896	NR_163556	10.9822	-1.20295	NA	-1.89135	NA	0.845306	NA	1.5337	0.790725	-0.186775	NA	0.0871153	NA	-0.0409956	NA	-0.314886	0.999179	2.418	0.000781091	1.01657	NA
A1BG	NM_130786	487.309	-0.0101181	0.980865	0.0922764	0.82359	0.00640001	0.987469	-0.0959944	1	-0.228424	0.364558	-0.0465873	0.919045	0.324922	0.178354	0.143085	0.909979	0.00143955	0.99454	-0.217985	0.756297
A1BG-AS1	NR_015380	1121.2	0.0921106	0.612171	0.0511542	0.850192	-0.00450077	0.985332	0.0364556	1	0.000151108	0.999757	0.0462754	0.858129	0.053413	0.900639	0.00728872	0.999179	0.00421362	0.975395	-0.0916567	0.843454
A1CF	NM_001370131	0.997974	0.629537	NA	0.146169	NA	-3.49894	NA	-3.01558	NA	-0.138441	NA	1.32674	NA	1.96129	NA	0.49615	NA	-1.8869	NA	-0.76698	NA
A2M	NM_001347423	213.031	0.174257	0.783034	0.100329	0.915863	0.0954246	0.880397	0.169352	1	-0.0519368	0.94332	0.199714	0.708075	0.195111	0.814649	-0.0565394	0.999179	3.04753	2.56e-34	-0.225896	0.86946
A2M-AS1	NR_137424	3.1052	0.00447592	NA	0.988968	NA	1.29366	NA	0.309177	NA	0.0757606	NA	-0.447163	NA	0.236947	NA	0.759868	NA	1.6413	0.255329	0.0717851	NA
A2ML1	NM_001282424	0.760976	2.02173	NA	1.72242	NA	-0.164235	NA	0.13506	NA	2.03164	NA	1.72803	NA	-0.521645	NA	-0.218034	NA	0.929456	NA	0.0094707	NA
A2MP1	NR_040112	0.551067	-0.355594	NA	-1.11357	NA	-1.74762	NA	-0.989669	NA	-0.752179	NA	-1.67456	NA	0.202626	NA	1.12497	NA	0.378817	NA	-0.3972	NA
A3GALT2	NM_001080438	1.69727	3.49375	NA	1.33524	NA	-2.74776	NA	-0.589284	NA	-1.68579	NA	-1.21348	NA	1.61345	NA	1.14115	NA	2.88617	0.240518	-5.17889	NA
A4GALT	NM_017436	2922.9	-0.19169	0.416247	0.342369	0.057834	0.328994	0.0586164	-0.205065	0.636561	-0.296502	0.107557	0.206207	0.365007	0.261806	0.256536	-0.240902	0.423051	0.860597	6.2e-12	-0.104532	0.882666
A4GNT	NM_016161	0.81147	0.137941	NA	0.567118	NA	-1.62187	NA	-2.05103	NA	-1.10023	NA	0.70601	NA	3.26853	NA	1.46234	NA	-1.46304	NA	-1.23842	NA
AA06	NR_037584	0	NA	NA	NA	NA	NA	NA	NA	NA	NA	NA	NA	NA	NA	NA	NA	NA	NA	NA	NA	NA
AAAS	NM_015665	7587.88	0.0603582	0.740598	0.0638925	0.784452	0.00566258	0.980098	0.00212827	1	0.0425594	0.857024	0.0430913	0.8581	0.0600144	0.8658	0.0594826	0.989185	-0.114951	0.228238	-0.0174324	0.976475
AACS	NM_023928	8973.99	-0.0278009	0.850983	0.114061	0.300706	0.1079	0.265028	-0.0339614	1	-0.0426879	0.790167	0.164297	0.0699176	0.171242	0.0686017	-0.0357429	0.999179	0.0904098	0.205119	-0.0145609	0.973292
AACSP1	NR_135095	2.99014	-1.77558	NA	0.0472282	NA	1.68838	NA	-0.134422	NA	-0.55941	NA	-2.06854	NA	-1.31346	NA	0.195635	NA	-2.22933	0.147279	1.21636	NA
AADAC	NM_001086	0.349134	0	NA	0.936406	NA	0	NA	-0.98963	NA	-0.453702	NA	-3.04666	NA	-2.39706	NA	0	NA	2.83875	NA	-0.391263	NA
AADACL2	NM_207365	0.520193	-1.02454	NA	0.952799	NA	0.971377	NA	-1.00587	NA	1.32951	NA	-2.06576	NA	-2.23772	NA	1.15739	NA	0.895714	NA	2.35445	NA
AADACL2-AS1	NR_110202	0.0673539	0.883456	NA	0	NA	-0.936541	NA	0	NA	0	NA	0.785678	NA	0	NA	-0.766053	NA	-0.0324065	NA	-1.02167	NA
AADACL3	NR_111984	0.0365413	-1.02441	NA	-0.986899	NA	0	NA	0	NA	0	NA	0	NA	0	NA	0	NA	-0.993962	NA	0.88619	NA
AADACL4	NM_001013630	0.120144	0	NA	0	NA	0	NA	0	NA	0	NA	0	NA	2.49863	NA	2.53625	NA	-0.0324579	NA	-0.0751255	NA
AADACP1	NR_026915	0	NA	NA	NA	NA	NA	NA	NA	NA	NA	NA	NA	NA	NA	NA	NA	NA	NA	NA	NA	NA
AADAT	NM_182662	0.890103	-0.360573	NA	0.598847	NA	-0.397938	NA	-1.35734	NA	-0.138433	NA	1.70463	NA	1.16364	NA	-0.679392	NA	-1.6274	NA	0.221779	NA
AAGAB	NM_024666	7182.63	0.0370411	0.639475	0.0242387	0.828149	0.0286775	0.7004	0.0414798	0.928249	0.056072	0.419936	0.0430793	0.599261	-0.0141397	0.945426	-0.00114712	0.999179	0.163019	2.53e-05	0.0193305	0.936584
AAK1	NM_014911	11071.2	-0.171421	0.100025	0.268683	0.00126789	0.242916	0.00403839	-0.197187	0.0561854	-0.057232	0.728073	0.247048	0.00470452	0.163621	0.148169	-0.140659	0.34039	0.286974	3.8e-05	0.114473	0.738117
AAMDC	NM_001316962	448.31	-0.200539	0.399064	0.108451	0.753702	0.345666	0.0456834	0.0366755	1	-0.0180431	0.964714	0.0342217	0.934819	0.132093	0.748088	0.0798279	0.994454	0.263956	0.0575682	0.182776	0.7705
AAMP	NM_001302545	12489.1	0.0179944	0.881731	-0.0260524	0.86242	-0.0357637	0.713809	0.00828304	1	-0.0789702	0.370939	-0.100813	0.214882	-0.0330328	0.881433	-0.0111895	0.999179	-0.0778496	0.163862	-0.0966606	0.696344
AANAT	NR_110548	9.95173	-0.468062	NA	-0.231293	NA	1.07989	NA	0.843121	0.769587	0.369796	NA	0.337598	NA	-0.663527	NA	-0.631329	0.878881	0.342416	0.64819	0.838247	NA
AAR2	NM_001271874	5394.69	0.079964	0.429809	0.00811241	0.965342	-0.0797817	0.365315	-0.00793013	1	-0.0801278	0.424316	-0.0559856	0.653045	0.0259678	0.924472	0.0018256	0.999179	0.0558434	0.388299	-0.15977	0.580178
AARD	NM_001025357	28.8667	0.23239	0.74791	0.166658	NA	0.131859	0.852313	0.19759	1	0.543376	0.387405	-0.249908	NA	-0.557663	NA	0.23562	0.994484	-0.562011	0.157292	0.31111	0.864532
AARS	NM_001605	34920.1	-0.00214586	0.98286	0.167388	3.65e-05	0.135033	0.00145484	-0.0345015	0.966786	-0.114796	0.0107077	0.0908328	0.0789913	0.212544	5.6e-08	0.00691494	0.999179	0.163151	4.58e-06	-0.112356	0.537482
AARS2	NM_020745	5998.33	0.0660578	0.475255	-0.00675557	0.968002	-0.0366917	0.700883	0.0361217	1	-0.0310925	0.81171	0.059321	0.562641	0.0828357	0.437275	-0.0075778	0.999179	0.0925936	0.0856673	-0.0968294	0.695068
AARSD1	NM_001261434	4309.33	0.10238	0.505322	0.0795036	0.686479	-0.00556126	0.979758	0.0173155	1	0.0536258	0.797771	0.180334	0.148846	0.140089	0.406251	0.0133811	0.999179	-0.178971	0.039268	-0.0484132	0.921941
AASDH	NM_001286668	1472.06	-0.143337	0.53569	-0.0191974	0.961827	0.178881	0.345108	0.0547412	1	0.066361	0.839471	0.0548692	0.87698	-0.0557853	0.925252	-0.0442934	0.999179	-0.0495606	0.746624	0.209949	0.719138
AASDHPPT	NM_015423	6380.1	-0.135984	0.566217	-0.115239	0.697556	0.10109	0.65368	0.0803451	1	0.0574345	0.86741	-0.0584202	0.868671	-0.147439	0.675306	-0.0315838	0.999179	-0.126293	0.369658	0.193644	0.740235
AASS	NM_005763	164.474	-0.054931	0.894266	-0.0925205	0.855749	-0.0797724	0.828409	-0.0421829	1	0.291995	0.552024	0.299484	0.554383	0.0666837	0.964599	0.0591951	0.999179	-2.97804	1.1e-46	0.347232	0.738482
AATBC	NR_026961	54.4522	-0.232651	0.810045	0.488967	0.603824	0.755237	0.237655	0.0336201	1	-0.85381	0.254509	-1.04773	NA	0.345668	NA	0.539584	0.856916	-1.48298	0.000767252	-0.620885	0.77147
AATF	NM_012138	14695.8	0.0653679	0.423784	-0.13948	0.0164894	-0.146834	0.00797446	0.0580135	0.819703	-0.0605611	0.470098	-0.17061	0.00205694	-0.105694	0.151532	0.00435522	0.999179	-0.311272	7.83e-13	-0.125636	0.59532
AATK	NM_004920	14.5158	-0.525786	NA	-0.618098	NA	-0.17432	NA	-0.0820087	1	-0.0720694	NA	-0.0625287	NA	-0.37373	NA	-0.383271	0.996976	0.948507	0.213554	0.453983	0.910884
ABALON	NR_131907	65.0384	-0.0500357	0.952103	-0.44004	0.505473	-0.19819	0.75511	0.191814	1	-0.151219	0.852813	0.0229598	0.982787	0.0548558	0.978841	-0.119323	0.999179	0.806032	0.0106305	-0.10084	0.963049
ABAT	NM_020686	1060.78	-0.149781	0.16541	-0.32442	3.04e-05	-0.247798	0.0029723	-0.0731591	0.936387	-0.142957	0.200481	-0.272215	0.00227957	-0.285071	0.00214173	-0.155812	0.308325	-0.627789	1.09e-20	0.00710954	0.991473
ABCA1	NM_005502	198.337	-0.388114	0.572561	0.401446	0.599488	0.659619	0.202735	-0.129941	1	0.28569	0.713835	0.400308	0.559848	0.224906	0.874886	0.110287	0.999179	1.16604	0.000756415	0.674032	0.695068
ABCA10	NM_080282	214.374	-0.0224277	0.962961	-0.102718	0.842098	-0.0987307	0.784389	-0.0184405	1	0.176027	0.629249	-0.0755018	0.88245	-0.154041	0.80043	0.0974876	0.999179	0.0987143	0.646472	0.198793	0.816967
ABCA11P	NR_002451	779.374	-0.0580596	0.755117	0.0248425	0.93097	-0.0465309	0.795059	-0.129433	0.694651	0.0355672	0.891827	0.101398	0.578849	0.00971768	0.986096	-0.0561131	0.99388	-0.332792	0.000148969	0.093961	0.826141
ABCA12	NM_015657	439.98	-0.391279	0.597963	-0.260927	0.805078	-0.336804	0.630859	-0.467156	0.852073	-0.254059	0.776636	-0.281998	0.75164	-0.23725	0.880311	-0.209311	0.996976	2.73032	1.3e-14	0.137369	0.95762
ABCA13	NM_152701	16.6669	0.124253	0.940894	0.418045	NA	0.567706	NA	0.273914	1	0.289696	0.866222	0.527134	NA	-0.375023	NA	-0.61246	0.904987	0.207589	0.797751	0.165499	0.969287
ABCA17P	NR_003574	13.6148	0.672885	NA	-0.293403	NA	-0.237789	NA	0.728497	0.95392	1.29764	NA	1.03953	NA	-1.43291	NA	-1.1748	0.725634	-1.92925	0.0257592	0.625296	0.884317
ABCA2	NM_001606	624.263	-0.0090325	0.987409	0.0352061	0.958695	-0.0141153	0.979706	-0.0583538	1	-0.0744769	0.905471	0.0224633	0.978141	-0.0145637	0.98938	-0.111504	0.999179	0.503054	0.0193219	-0.0650859	0.966235
ABCA3	NM_001089	1888.71	0.0432721	0.810818	-0.0285304	0.914059	-0.130434	0.292494	-0.0586316	1	-0.195099	0.128569	-0.112162	0.520525	0.105481	0.684047	0.0225439	0.999179	-1.68266	1.34e-100	-0.238014	0.588689
ABCA4	NM_000350	9.00646	-0.432325	NA	0.256423	NA	0.604532	NA	-0.0842138	1	-1.42681	NA	-0.981864	NA	1.54679	NA	1.10184	0.548624	1.69933	0.0247149	-0.994741	NA
ABCA5	NM_172232	4378.91	-0.165603	0.658179	-0.134506	0.790087	0.221767	0.469649	0.19067	0.937232	0.0645453	0.908562	-0.0792805	0.883158	-0.113167	0.891659	0.0306584	0.999179	0.320147	0.109166	0.230317	0.796375
ABCA6	NM_080284	2307.97	-0.239635	0.14311	0.0191241	0.955687	0.229199	0.124476	-0.0295596	1	0.0429166	0.887843	0.0692914	0.791679	-0.101823	0.766785	-0.128197	0.793423	0.957183	6.56e-22	0.282885	0.610018
ABCA7	NM_019112	6305.84	-0.0105189	0.962175	-0.0389862	0.875827	-0.0354863	0.839972	-0.00701898	1	-0.00102511	0.997828	0.0102699	0.974284	0.0665966	0.826699	0.0553016	0.989185	0.589755	4.42e-14	0.00980441	0.988975
ABCA8	NM_001288985	2.39244	2.09422	NA	2.24376	NA	-3.10913	NA	-3.25867	NA	0.347239	NA	-0.733924	NA	-0.364043	NA	0.717114	NA	3.42511	0.0732436	-1.74614	NA
ABCA9	NM_080283	203.145	-0.165671	0.752653	-0.511394	0.191727	-0.177479	0.707875	0.168244	1	0.0231667	0.974984	-0.317041	0.465704	-0.457492	0.273044	-0.117284	0.999179	1.20914	1.73e-07	0.188967	0.884563
ABCA9-AS1	NR_126414	0.0838787	-1.02442	NA	-0.986916	NA	0	NA	0	NA	0	NA	0	NA	1.11973	NA	1.15735	NA	-0.993997	NA	0.88626	NA
ABCB1	NM_000927	1116.67	0.828958	1.25e-07	0.209525	0.490179	0.0679761	0.824596	0.687409	3.03e-05	0.434357	0.010693	0.0603862	0.881727	0.0723451	0.914282	0.446316	0.0139549	2.37427	1.75e-67	-0.394334	0.60385
ABCB10	NM_012089	5230	-0.0580779	0.712929	0.0221977	0.928254	0.0342786	0.829807	-0.045997	1	0.0162947	0.94635	0.0557758	0.766258	-0.0346662	0.925252	-0.0741473	0.911798	-0.348043	2.26e-06	0.074674	0.842915
ABCB11	NM_003742	3.36686	4.46428	NA	0	NA	-4.51739	NA	0	NA	-0.803888	NA	-0.765956	NA	0.0303505	NA	-0.00758106	NA	5.41346	0.00115341	-5.26709	NA
ABCB4	NM_018850	758.803	-0.311332	0.19099	0.0792617	0.855708	0.0913829	0.758062	-0.299211	0.346559	-0.216941	0.384713	0.144057	0.645763	0.140283	0.766785	-0.220715	0.607689	1.04013	8.84e-14	0.0947303	0.912303
ABCB5	NM_001163942	0.377889	0	NA	0	NA	2.01113	NA	1.97363	NA	2.41528	NA	0.785611	NA	-0.0336706	NA	1.5958	NA	-0.0321426	NA	2.47784	NA
ABCB6	NM_005689	3275.87	-0.124816	0.362987	-0.0543063	0.80318	-0.0320615	0.850935	-0.102571	0.802943	-0.212975	0.0327993	-0.076163	0.653588	0.0861811	0.707749	-0.0506309	0.990796	0.762555	1.93e-25	-0.0878958	0.816967
ABCB7	NM_004299	5383.19	0.0257315	0.796379	0.0670015	0.445951	0.0344382	0.688598	-0.00683191	1	0.0330134	0.765675	0.0307913	0.79037	-0.0076791	0.981144	-0.00545701	0.999179	-0.0454834	0.388859	0.00758296	0.982409
ABCB8	NM_007188	4876.07	0.125234	0.354041	0.0058841	0.983848	-0.105102	0.392732	0.0142478	1	0.0811508	0.610939	0.0988841	0.514684	0.0486244	0.885433	0.0308911	0.999179	0.037044	0.698863	-0.0437488	0.926268
ABCB9	NM_001243013	730.687	-0.526978	0.0373765	0.387885	0.145718	0.912721	4.57e-06	-0.0021421	1	-0.302416	0.195616	0.57942	0.0015754	0.805524	1.83e-06	-0.0763112	0.999179	2.78278	1.04e-70	0.224788	0.782664
ABCC1	NM_004996	15227.3	0.124841	0.112434	-0.03416	0.819685	-0.115685	0.113625	0.0433168	1	0.0319691	0.816483	0.0712282	0.48002	0.00114849	0.99781	-0.0381106	0.987133	-0.0845339	0.141216	-0.0925371	0.713338
ABCC10	NM_001350518	2819.72	-0.0236297	0.872408	0.0788146	0.543274	0.112226	0.220968	0.00978117	1	-0.0688791	0.570724	0.114787	0.243375	0.157176	0.0832938	-0.0264895	0.999179	0.447341	3.2e-14	-0.0449485	0.896947
ABCC11	NM_145186	27.6625	0.620974	0.39889	0.11166	NA	-0.403276	0.567173	0.106038	1	1.34189	0.00148475	-0.0924274	NA	-0.272281	NA	1.16203	0.0174762	0.554117	0.232529	0.721223	0.700668
ABCC12	NM_033226	2.59118	1.93473	NA	-2.49894	NA	-1.005	NA	3.42862	NA	-2.96119	NA	-1.00363	NA	0.848806	NA	-1.10874	NA	2.75668	0.0705765	-4.89566	NA
ABCC13	NR_003088	0.276077	0	NA	0	NA	0	NA	0	NA	1.97889	NA	2.96071	NA	-1.9592	NA	-2.94087	NA	-0.616931	NA	2.04093	NA
ABCC2	NM_000392	68.9604	0.523352	0.243624	-0.0773846	0.932092	-0.614453	0.0983834	-0.013716	1	0.200667	0.753919	-0.0780321	0.927211	-0.347679	0.628736	-0.0689803	0.999179	0.229669	0.476949	-0.322352	0.80363
ABCC3	NM_001144070	14.0072	-0.704187	NA	-1.01408	NA	-0.0441369	NA	0.265756	1	0.186988	NA	-0.397333	NA	-1.38961	NA	-0.805288	0.989185	-4.01213	1.32e-08	0.891634	0.794799
ABCC4	NM_005845	10331.6	-0.0312136	0.900228	0.181952	0.303846	0.234678	0.0952454	0.0215125	1	0.0542144	0.848665	0.228352	0.141054	0.132841	0.631258	-0.0412971	0.999179	-0.34975	0.000699175	0.0856939	0.875977
ABCC5	NM_005688	1559.5	0.113007	0.550423	-0.0130643	0.968314	-0.185714	0.198654	-0.059643	1	-0.0443776	0.877448	0.134611	0.483036	0.0349317	0.947668	-0.144057	0.675464	-0.541302	2.15e-08	-0.157019	0.740235
ABCC5-AS1	NR_046570	2.40166	-2.49171	NA	-1.54485	NA	0.0131641	NA	-0.93368	NA	-0.606298	NA	0.0748232	NA	-1.35339	NA	-2.03451	NA	1.43049	0.229693	1.88605	NA
ABCC6	NM_001171	8.86401	-1.12299	NA	-0.308608	NA	0.169246	NA	-0.645136	1	-0.474337	NA	-0.735981	NA	0.130442	NA	0.392086	0.995306	1.04249	0.155416	0.64833	NA
ABCC6P1	NR_003569	0.382056	1.45949	NA	0.9365	NA	-0.550837	NA	-0.0278706	NA	-0.0503115	NA	-0.233697	NA	-1.80981	NA	-1.62643	NA	1.84767	NA	-1.51043	NA
ABCC6P2	NR_023387	0.0365249	0	NA	0	NA	0	NA	0	NA	0	NA	0.785695	NA	0	NA	-0.766036	NA	-0.0323041	NA	-0.0753984	NA
ABCC8	NM_001351295	1.12373	-0.0525336	NA	-0.0252491	NA	1.49473	NA	1.46745	NA	-1.65098	NA	-0.31901	NA	-1.38121	NA	-2.71317	NA	3.01939	0.171732	-1.59816	NA
ABCC9	NM_005691	8.02007	1.3859	NA	0.710064	NA	-1.09491	NA	-0.419078	NA	0.108959	NA	0.403353	NA	0.0833921	NA	-0.211002	NA	1.87584	0.0371674	-1.27681	NA
ABCD1	NM_000033	1603.55	0.0374955	0.920867	-0.373653	0.0725651	-0.464668	0.0110201	-0.0535193	1	0.0238454	0.95925	-0.191375	0.491548	-0.235134	0.447014	-0.0199137	0.999179	1.30012	5.57e-21	-0.0132959	0.992334
ABCD2	NM_005164	1793.55	-0.700645	2.72e-05	0.411931	0.0435161	0.765484	3.99e-06	-0.347091	0.193607	-0.263078	0.286589	0.336335	0.138687	0.448231	0.0331146	-0.151182	0.904326	0.00554941	0.980581	0.437754	0.577905
ABCD3	NM_002858	4448.07	-0.213323	0.406027	0.0327271	0.944301	0.174252	0.46409	-0.0717987	1	0.0532698	0.902678	0.0863349	0.81696	-0.0362442	0.966534	-0.0693093	0.999179	-0.294567	0.0531398	0.26682	0.701279
ABCD4	NM_020325	2867.02	0.106832	0.407505	0.0447197	0.827223	-0.0148427	0.932651	0.0472698	1	0.119467	0.317331	0.0280671	0.895242	0.0127279	0.98007	0.104128	0.664184	0.0818541	0.319231	0.0129434	0.97891
ABCE1	NM_002940	19468.8	-0.171379	0.569822	-0.108685	0.802413	0.117345	0.689087	0.0546514	1	0.106093	0.783767	-0.0348557	0.949628	-0.160891	0.747479	-0.0199422	0.999179	-0.123585	0.503051	0.27769	0.711915
ABCF1	NM_001025091	23715	0.067791	0.386355	-0.116487	0.0549387	-0.154397	0.00328687	0.0298804	1	-0.013796	0.918148	-0.0744443	0.326008	-0.0578729	0.621219	0.0027754	0.999179	-0.182878	2.56e-05	-0.0812866	0.702396
ABCF2	NM_007189	19759.1	0.0957361	0.483465	0.040572	0.851678	-0.0178023	0.9196	0.0373617	1	0.01148	0.96135	0.0506055	0.789383	0.0122175	0.981368	-0.026908	0.999179	-0.148282	0.0596449	-0.083941	0.816967
ABCF3	NM_018358	7559.83	0.0649707	0.440758	0.0168492	0.91297	-0.0310423	0.732317	0.0170791	1	-0.0280297	0.817662	0.0386504	0.726509	0.0528714	0.701431	-0.0138088	0.999179	0.0536697	0.310362	-0.0927208	0.685893
ABCG1	NM_004915	2039.11	-0.292168	0.691878	0.429725	0.56988	0.382693	0.531263	-0.3392	0.966108	-0.176049	0.855784	0.352376	0.651861	0.214657	0.891659	-0.313768	0.945361	2.08653	1.05e-09	0.116488	0.963035
ABCG2	NM_001348986	51.78	-0.0526821	0.943527	-0.168913	0.837666	-0.077172	0.908709	0.0390593	1	-0.302481	0.733021	-0.488672	NA	-0.664084	NA	-0.477893	0.854102	-2.02962	1.98e-10	-0.24952	0.894257
ABCG4	NM_001142505	5.90493	0.234676	NA	-0.0206824	NA	-1.58554	NA	-1.33018	NA	-1.10137	NA	-0.760377	NA	0.0723188	NA	-0.268678	NA	1.14266	0.265709	-1.33562	NA
ABCG5	NM_022436	0.383506	0	NA	0	NA	0.971324	NA	0.933821	NA	0.217833	NA	-0.13172	NA	-0.268329	NA	0.0811952	NA	1.81967	NA	0.281513	NA
ABCG8	NM_001357321	0.341373	0	NA	2.27485	NA	0	NA	-2.32788	NA	0	NA	2.97842	NA	1.11969	NA	-1.99687	NA	-0.0324052	NA	-0.0752293	NA
ABHD1	NM_032604	10.1996	-0.55575	NA	-0.00536678	NA	0.443347	NA	-0.107036	1	0.635887	NA	1.21784	NA	-0.125057	NA	-0.707013	0.847401	-1.12119	0.120602	1.19154	NA
ABHD10	NM_018394	3524.41	-0.169301	0.18306	-0.0240562	0.92716	0.102894	0.429254	-0.0423505	1	0.00343373	0.990623	0.0985512	0.540305	0.0323738	0.937008	-0.0627436	0.973771	-0.052252	0.588064	0.17306	0.673243
ABHD11	NM_148912	1124.46	-0.00633592	0.981246	-0.0722203	0.776466	-0.141026	0.33336	-0.0751414	1	-0.12804	0.459281	-0.1385	0.421875	-0.0978707	0.748088	-0.0874115	0.935531	-0.171637	0.0890507	-0.121388	0.789326
ABHD11-AS1	NR_026690	39.6451	-0.253689	0.729222	0.437771	0.512251	0.963283	0.0200851	0.271823	0.990911	0.320685	0.608243	0.110928	NA	0.0967904	NA	0.306547	0.890405	0.495116	0.167939	0.574612	0.713338
ABHD12	NM_001042472	6345.21	-0.0203173	0.810274	0.0621774	0.360696	-0.0109847	0.899463	-0.0934795	0.132683	-0.0849373	0.114188	0.0117371	0.922138	0.0350517	0.784686	-0.0616227	0.552388	0.0781157	0.0502104	-0.0643185	0.719138
ABHD12B	NM_001206673	1.78358	-0.912464	NA	0.684268	NA	1.63454	NA	0.0378153	NA	0.823349	NA	0.785724	NA	-0.80377	NA	-0.766145	NA	-3.92094	0.0357878	1.73554	NA
ABHD13	NM_032859	2044.77	-0.16496	0.636276	-0.0506531	0.929512	0.187185	0.532223	0.0728781	1	0.171125	0.645514	-0.0267002	0.967608	-0.160514	0.785519	0.0373117	0.999179	-0.133367	0.519717	0.336264	0.695068
ABHD14A	NM_015407	1079.84	0.0253183	0.917556	-0.00725589	0.983892	-0.149889	0.316507	-0.117315	0.857794	-0.0850482	0.703364	-0.0513028	0.849044	0.0482865	0.920672	0.0145412	0.999179	-0.252234	0.0120321	-0.109991	0.816979
ABHD14A-ACY1	NM_001316331	2039.2	0.0301295	0.867208	0.116107	0.424396	-0.00295993	0.988774	-0.0889377	0.88458	-0.040141	0.850479	0.0825021	0.616471	0.0800052	0.743756	-0.0426378	0.999179	-0.0813521	0.357598	-0.0699303	0.859913
ABHD14B	NM_001146314	6488	0.060232	0.653152	0.0794972	0.575876	0.0240271	0.869563	0.00476191	1	-0.0804456	0.532415	0.0239703	0.907199	0.097375	0.540897	-0.00704085	0.999179	-0.200736	0.00287649	-0.140347	0.673417
ABHD15	NM_198147	1698.74	-0.149331	0.142638	-0.197589	0.0228122	-0.193655	0.0225459	-0.145397	0.262614	-0.171174	0.0840254	-0.219755	0.0185654	-0.0702953	0.771421	-0.021714	0.999179	-1.04361	7.7e-59	-0.0215475	0.966235
ABHD16A	NM_021160	4249.31	0.276002	9.9e-07	0.138814	0.0590851	0.00318383	0.981686	0.140372	0.0824409	0.18888	0.00277704	0.0335127	0.807017	0.0187387	0.945676	0.174106	0.013208	-0.105421	0.0639549	-0.0868008	0.735073
ABHD16B	NM_080622	16.6448	-0.380165	0.730292	-0.0740728	NA	0.631092	NA	0.325001	1	0.0901957	0.956765	-0.66094	NA	0.190121	NA	0.941255	0.450704	-0.0100867	0.989755	0.470454	0.857351
ABHD17A	NM_001130111	9077.75	0.101877	0.476764	-0.0139048	0.955781	-0.159432	0.151268	-0.0436502	1	-0.0610318	0.743186	-0.0358776	0.874222	0.0705749	0.792102	0.0454207	0.996684	-0.00991563	0.92393	-0.162557	0.675181
ABHD17B	NM_016014	1838.79	-0.0476487	0.750583	-0.0429138	0.829641	-0.064779	0.610933	-0.0695139	0.95392	-0.0567508	0.730718	0.0149132	0.953278	0.0208069	0.962309	-0.0508571	0.987063	-0.0751631	0.35025	-0.00877641	0.987856
ABHD17C	NM_021214	639.75	-0.214674	0.409531	-0.384238	0.0553823	-0.16938	0.488577	0.000184397	1	-0.211303	0.438182	-0.0675489	0.878381	-0.0918687	0.894661	-0.235623	0.604812	-0.949304	2.27e-11	0.00367503	0.998703
ABHD18	NM_001366045	1664.15	-0.0597204	0.728276	-0.00562979	0.985961	0.133536	0.274534	0.0794456	0.955213	0.278578	0.00319895	0.12791	0.360552	-0.155997	0.276116	-0.00532848	0.999179	0.162848	0.0572838	0.338584	0.177563
ABHD2	NM_152924	12308.1	0.0625195	0.694022	0.103151	0.503521	0.0186137	0.918172	-0.022018	1	0.105669	0.446184	0.183885	0.0974071	-0.02267	0.96173	-0.100887	0.7486	0.40306	5.59e-08	0.0434608	0.925947
ABHD3	NM_138340	1600.35	-0.139518	0.388152	-0.109515	0.573837	0.0345807	0.861772	0.00457799	1	0.0634845	0.776636	0.0403946	0.880493	0.00585367	0.99057	0.0289436	0.999179	-0.128873	0.202541	0.20329	0.667487
ABHD4	NM_022060	2959.13	-0.336712	0.0520104	0.177982	0.457944	0.203354	0.283882	-0.31134	0.119279	-0.390262	0.00833956	0.181966	0.399672	0.326352	0.0627862	-0.245876	0.317087	1.81748	1.04e-56	-0.0532798	0.946297
ABHD5	NM_001355186	782.657	-0.0358557	0.822676	-0.0834228	0.590778	-0.0151395	0.929805	0.0324277	1	-0.107634	0.401904	-0.0743357	0.63778	0.0492846	0.874886	0.0159859	0.999179	-0.215883	0.00299708	-0.0715158	0.841662
ABHD6	NM_001320126	565.015	-0.288782	0.162024	-0.161141	0.564621	-0.089549	0.730543	-0.21719	0.596075	-0.483121	0.00104305	-0.251263	0.210662	0.0535037	0.933877	-0.178355	0.703671	0.692299	2.85e-08	-0.194051	0.756297
ABHD8	NM_024527	2577.09	-0.0358822	0.849968	-0.0821953	0.673395	-0.194282	0.0834117	-0.147969	0.492681	-0.298561	0.00181982	-0.154932	0.242066	0.0700104	0.81414	-0.0736188	0.941504	0.407923	3.15e-07	-0.26238	0.50158
ABI1	NM_001012751	11074.1	0.0520307	0.567856	-0.0231959	0.867248	-0.0253927	0.790979	0.049834	0.927869	0.0935348	0.189399	-0.00985174	0.954126	-0.0572843	0.66666	0.0461022	0.912053	0.030287	0.594708	0.0418004	0.864903
ABI2	NM_001282932	5351.54	-0.124462	0.0501715	-0.174486	0.00127692	-0.144595	0.0108741	-0.094572	0.323812	-0.108499	0.0877778	-0.138519	0.0210373	-0.131818	0.0428192	-0.101798	0.229602	-0.0139407	0.812281	0.01626	0.958906
ABI3	NM_016428	13989	0.0398295	0.8363	0.0693855	0.756921	-0.0193882	0.924525	-0.0489442	1	-0.146548	0.29126	-0.0252822	0.924795	0.0221225	0.966474	-0.0991434	0.829838	0.179923	0.0441625	-0.186048	0.673243
ABI3BP	NM_001349332	45.8559	0.923916	0.31304	0.244259	0.890665	-0.25783	0.794281	0.421826	1	0.492614	0.387115	-0.215184	NA	-0.281339	NA	0.426458	0.766934	3.51239	1.38e-14	-0.431018	0.84624
ABITRAM	NM_017832	1563.41	-0.123966	0.441318	-0.0681046	0.777012	0.143095	0.292232	0.0872344	0.955675	-0.0492384	0.83653	0.0149177	0.964111	0.0249543	0.964345	-0.0392019	0.999179	-0.0648154	0.542141	0.0749741	0.873865
ABL1	NM_005157	23607.8	0.144979	0.0757903	0.0669261	0.588029	-0.0458618	0.662824	0.0321913	1	0.0307744	0.841348	0.106573	0.249716	0.0451077	0.834355	-0.0306905	0.999179	0.236852	2.26e-05	-0.113884	0.683854
ABL2	NM_001168239	2364.66	0.01831	0.922382	-0.123333	0.343499	-0.135767	0.208718	0.00587569	1	0.0499146	0.784916	-0.0902718	0.545478	-0.175324	0.136468	-0.0351376	0.999179	-0.239536	0.00125048	0.031883	0.946297
ABLIM1	NM_001322891	7951.34	-0.207641	0.0171018	0.164406	0.0852795	0.191377	0.0253414	-0.180669	0.0752111	-0.163057	0.0842612	0.180264	0.0558777	0.191792	0.0482147	-0.15153	0.220066	-0.750239	7.64e-32	0.0448602	0.909079
ABLIM2	NM_001130088	18.4136	-0.861558	0.330984	-0.261415	NA	0.891017	NA	0.290874	1	-0.511905	0.574195	-0.317735	NA	0.0892132	NA	-0.104957	0.999179	0.540291	0.299778	0.349614	0.89754
ABLIM3	NM_001301028	0.634727	0	NA	2.65262	NA	0	NA	-2.70567	NA	0	NA	1.6822	NA	4.26357	NA	2.44302	NA	-0.0325309	NA	-0.0750071	NA
ABO	NM_020469	27.2892	0.0250368	0.985906	-0.112809	NA	-0.138113	0.912743	-0.000266927	1	0.0554301	0.969207	-0.246735	NA	0.183513	NA	0.485678	0.86608	1.59224	0.00127944	0.0307072	0.995135
ABR	NM_001322841	22919.3	-0.0513783	0.680479	-0.0618576	0.662072	-0.119686	0.169442	-0.109206	0.484403	-0.184658	0.0156505	0.0251906	0.88722	0.0333842	0.908274	-0.176464	0.0411174	-0.222972	0.000213525	-0.132996	0.673102
ABRA	NM_139166	0.0788643	0	NA	0.936486	NA	0	NA	-0.98955	NA	0.823302	NA	0	NA	-0.803671	NA	0	NA	-0.0324081	NA	0.88652	NA
ABRACL	NM_021243	13294.8	-0.0950297	0.68643	0.206639	0.283922	0.312021	0.0333475	0.0103526	1	0.135207	0.544744	0.0656849	0.82747	-0.0522352	0.925515	0.0172866	0.999179	-0.139483	0.279174	0.230566	0.681492
ABRAXAS1	NM_139076	1358.42	-0.343832	0.22393	0.114079	0.814029	0.297937	0.250451	-0.159973	0.975208	0.013807	0.981432	0.148042	0.71512	0.00660179	0.994705	-0.127633	0.983954	-0.232206	0.229567	0.357888	0.677259
ABRAXAS2	NM_032182	3870.62	-0.0359311	0.858525	-0.0535651	0.827843	0.0670072	0.678845	0.0846412	0.956719	0.221437	0.0573443	0.0176979	0.955635	-0.130158	0.517016	0.0735813	0.958983	0.0640358	0.535714	0.257651	0.568335
ABT1	NM_013375	6811.46	0.126425	0.272929	-0.0612865	0.722948	-0.116344	0.257553	0.0713677	0.934001	-0.00573016	0.980693	-0.051793	0.759319	-0.0228585	0.952016	0.0232043	0.999179	-0.188988	0.00700566	-0.131795	0.695068
ABTB1	NM_172027	1661.61	-0.0470698	0.817589	0.263754	0.0257183	0.145787	0.290312	-0.165037	0.460649	-0.247492	0.0479757	-0.0516191	0.836257	0.232784	0.108141	0.0369112	0.999179	-0.761487	3.68e-18	-0.200142	0.673243
ABTB2	NM_145804	3360.12	0.0908203	0.787693	-0.0912963	0.837472	0.12038	0.67367	0.302497	0.377271	-0.0324357	0.943283	-0.140168	0.661693	-0.00988993	0.989873	0.0978423	0.989185	3.85379	2.38e-169	-0.122966	0.877173
ACAA1	NM_001607	10983.4	0.0589391	0.740746	0.0891727	0.640331	0.0472926	0.778581	0.017059	1	0.0648634	0.74548	0.114971	0.465142	0.0568888	0.873458	0.00678132	0.999179	0.0508665	0.61516	0.00626798	0.993519
ACAA2	NM_006111	8244.62	0.00280703	0.983557	0.0667064	0.512556	0.0564537	0.505651	-0.00744564	1	0.0356197	0.773323	0.0728099	0.431793	0.0476846	0.779379	0.0104944	0.999179	-0.273764	2.08e-08	0.0331261	0.909079
ACACA	NM_198836	12546.2	0.115075	0.657091	0.144879	0.608866	0.0396672	0.891532	0.00986296	1	0.114857	0.688342	0.389077	0.0210373	0.176766	0.583342	-0.0974545	0.980326	-0.0788492	0.61168	0.00017613	0.999653
ACACB	NM_001093	670.058	-0.230248	0.2298	0.0138313	0.971453	0.00321486	0.992231	-0.240864	0.316296	0.0932373	0.75811	0.0785752	0.808075	-0.0946558	0.847402	-0.0799938	0.99388	-1.38251	1.55e-33	0.323825	0.6142
ACAD10	NM_025247	3293.8	0.0877287	0.37003	0.171363	0.0156774	0.0696157	0.439787	-0.0140182	1	0.085793	0.360318	0.154079	0.0368876	0.0654392	0.675872	-0.0028463	0.999179	0.213133	0.000103161	-0.00161432	0.997952
ACAD11	NM_032169	2493.26	0.0279688	0.911429	0.121737	0.573693	0.0797517	0.671008	-0.0140162	1	0.15431	0.370321	0.153875	0.385495	0.0255945	0.966534	0.0260294	0.999179	0.559183	9.81e-09	0.126647	0.794799
ACAD8	NM_014384	2767.57	-0.102134	0.140119	0.0500407	0.617865	0.0902686	0.163529	-0.0619058	0.765377	-0.0629258	0.464827	0.037892	0.73473	0.087259	0.326176	-0.0135589	0.999179	-0.452175	3.85e-25	0.039499	0.870864
ACAD9	NM_014049	7811.35	0.118516	0.362438	0.0550623	0.78602	-0.0341572	0.828304	0.0292969	1	0.0668504	0.687048	0.0716354	0.667874	0.0426236	0.902744	0.0378387	0.999179	-0.214316	0.00454418	-0.051317	0.901515
ACADL	NM_001608	0.0376691	0	NA	0	NA	0	NA	0	NA	0	NA	0.785695	NA	0	NA	-0.766036	NA	-0.0323041	NA	-0.0753984	NA
ACADM	NM_000016	20459.8	0.0437654	0.661939	0.0369666	0.783653	0.0659059	0.403806	0.0727048	0.702465	0.0639973	0.485148	0.0151306	0.923721	0.00182457	0.994705	0.0506913	0.891677	-0.266104	2.53e-08	0.0205414	0.948677
ACADS	NM_000017	2923.38	0.0883179	0.466842	0.183848	0.0388906	0.0187376	0.902222	-0.0767928	0.882213	-0.0810445	0.526748	0.0481172	0.773132	0.146146	0.187514	0.0169842	0.999179	-0.0433135	0.589144	-0.169037	0.62716
ACADSB	NM_001609	5022.14	-0.0562182	0.657946	0.0367625	0.837476	-0.001371	0.99312	-0.0943517	0.680104	-0.0211154	0.911861	0.0178283	0.929216	-0.0293857	0.923981	-0.0683294	0.869385	-0.205776	0.00112339	0.03539	0.927396
ACADVL	NM_000018	17584	0.0715776	0.597963	0.032616	0.87769	-0.0569326	0.657036	-0.017971	1	-0.0202211	0.923867	-0.0206359	0.92506	0.0503226	0.8559	0.0507374	0.983954	0.359768	9.43e-08	-0.0914762	0.782664
ACAN	NM_001135	0.48713	0	NA	0.936461	NA	0	NA	-0.989665	NA	-3.01513	NA	-0.596298	NA	2.78855	NA	0.369915	NA	2.84468	NA	-2.95222	NA
ACAP1	NM_014716	23361.9	0.0419489	0.681456	0.0498238	0.668456	-0.0169122	0.878797	-0.0247871	1	0.0292216	0.822196	0.0442383	0.700814	0.0422221	0.814649	0.0272054	0.999179	0.0743289	0.172575	-0.0123968	0.971492
ACAP2	NM_012287	9206.92	-0.124315	0.415096	-0.0547709	0.820563	0.005306	0.981285	-0.0642379	1	0.127485	0.393385	0.0185908	0.951165	-0.120659	0.564149	-0.0117646	0.999179	-0.00103444	0.993352	0.252085	0.568335
ACAP3	NM_030649	4571.98	-0.0696593	0.740666	-0.142113	0.458913	-0.163487	0.273883	-0.0910327	0.976684	-0.142405	0.418531	-0.0855257	0.710198	0.0242917	0.966794	-0.0325877	0.999179	0.0459511	0.708222	-0.0724596	0.895894
ACAT1	NM_000019	11173.7	-0.0347064	0.779828	0.0964889	0.332523	0.127394	0.101667	-0.00380126	1	0.0926609	0.339675	0.143947	0.0779646	0.0182313	0.9557	-0.0330544	0.996707	-0.701907	2.52e-39	0.127703	0.664709
ACAT2	NM_005891	16265.6	-0.00248906	0.989811	0.300395	0.000148756	0.343665	6.55e-06	0.0407811	1	0.0734395	0.610627	0.43383	4.13e-09	0.389608	3.06e-07	0.0292171	0.999179	-0.0532343	0.520445	0.0762635	0.824178
ACBD3	NM_022735	7111.48	-0.0534031	0.687012	0.107998	0.340523	0.168654	0.0437306	0.00725309	1	0.0117003	0.955846	0.138185	0.155649	0.0746768	0.690453	-0.0518083	0.968696	0.0170114	0.838103	0.0653894	0.836604
ACBD3-AS1	NR_146443	6.30625	1.76226	NA	0.689319	NA	-0.355727	NA	0.717212	NA	0.34322	NA	0.31651	NA	-0.486361	NA	-0.459651	NA	1.06225	0.288784	-1.41832	NA
ACBD4	NM_001135706	1540.36	0.0358515	0.874544	0.231672	0.0908079	0.107407	0.50607	-0.088414	0.974931	-0.00681986	0.983799	0.160121	0.324702	0.103642	0.724293	-0.0632986	0.989185	0.0987249	0.369441	-0.0423269	0.945305
ACBD5	NM_001352574	3194.69	0.0259559	0.82585	-0.10722	0.192101	-0.0601055	0.490851	0.0730702	0.756744	0.1392	0.037416	0.0205318	0.891509	-0.0834573	0.441232	0.0352109	0.989185	0.225236	9.7e-06	0.113526	0.671268
ACBD6	NM_032360	6499.23	-0.0582626	0.581754	-0.0759602	0.480755	-0.00340894	0.981235	0.0142886	1	-0.0826835	0.384137	-0.0669886	0.540482	-0.0449002	0.826402	-0.0605951	0.857565	0.0586545	0.346503	-0.0241246	0.945305
ACBD7	NM_001039844	85.1901	0.183799	0.712789	0.137136	0.842127	-0.137721	0.769315	-0.0910577	1	-0.0806695	0.905292	0.00896727	0.991302	-0.0512939	0.971084	-0.140931	0.99388	0.545935	0.0240312	-0.264118	0.814799
ACBD7-DCLRE1CP1	NR_144471	8.24612	0.309013	NA	0.397485	NA	-0.656271	NA	-0.744743	NA	-0.505753	NA	-2.40783	NA	-0.846401	NA	1.05567	NA	-0.0749567	0.933995	-0.814449	NA
ACCS	NM_032592	541.153	0.143935	0.612171	0.254247	0.305053	0.046415	0.885703	-0.0638968	1	0.111102	0.754665	0.296495	0.20146	0.0582755	0.938458	-0.127117	0.951888	-0.51021	0.000515011	-0.0324598	0.973576
ACCSL	NM_001031854	1.23822	-0.785118	NA	-1.29016	NA	1.23881	NA	1.74385	NA	-0.0885036	NA	-0.182347	NA	-1.7557	NA	-1.66186	NA	-1.81409	0.406312	0.695904	NA
ACD	NM_001082486	4197.21	0.0992127	0.458119	-0.00784589	0.974416	-0.0786952	0.53495	0.0283634	1	-0.115385	0.366219	-0.0685028	0.684141	0.0111138	0.983361	-0.0357684	0.999179	-0.22737	0.00234755	-0.214268	0.575807
ACE	NM_000789	24.8952	0.741812	0.513612	0.317132	NA	-0.0751192	0.957918	0.34956	1	-0.522399	0.45089	-0.185357	NA	0.367458	NA	0.0304167	0.999179	3.26901	2.55e-10	-1.26376	0.632783
ACE2	NM_021804	0.719269	0.834912	NA	-1.75219	NA	-0.848813	NA	1.73823	NA	-0.661254	NA	-1.16728	NA	-0.299554	NA	0.206461	NA	1.10079	NA	-1.49595	NA
ACER1	NM_133492	1.97735	-1.20027	NA	-0.40928	NA	1.15312	NA	0.362143	NA	-0.692497	NA	-0.701924	NA	-0.676797	NA	-0.667369	NA	1.66673	0.210246	0.507741	NA
ACER2	NM_001010887	691.344	-0.0345641	0.936596	-0.173784	0.650234	-0.158653	0.592503	-0.0194327	1	-0.197899	0.519169	-0.19222	0.556207	-0.00927693	0.991939	-0.014956	0.999179	1.01016	1.28e-10	-0.163102	0.841662
ACER3	NM_018367	2564.93	-0.174204	0.433692	-0.0574718	0.87769	0.160036	0.420933	0.0433039	1	0.116873	0.660839	0.0426419	0.912203	-0.0438995	0.945465	0.0303312	0.999179	-0.160789	0.243752	0.291322	0.653269
ACHE	NM_001367915	738.833	0.0497779	0.901318	-0.519141	0.0154716	-0.6494	0.000806431	-0.0804808	1	-0.225634	0.442167	-0.447896	0.0436898	-0.212456	0.621919	0.00980507	0.999179	0.971655	7.81e-10	-0.275028	0.72584
ACIN1	NM_001164817	27338.7	0.144827	4.23e-06	-0.112429	0.00117263	-0.12528	0.000149354	0.131977	6.51e-05	0.0678826	0.0996378	-0.0918904	0.0160843	-0.0915471	0.0207426	0.0682258	0.184202	-0.0560683	0.0732339	-0.0766374	0.623755
ACKR1	NM_002036	324.745	0.23427	0.805329	0.122183	0.93097	-0.250925	0.769829	-0.138838	1	-0.00190351	0.999092	-0.171855	0.889465	-0.170712	0.937008	-0.00076052	1	1.9282	3.96e-06	-0.235924	0.928861
ACKR2	NM_001296	57.8088	-0.282819	0.46951	0.0647872	0.924893	-0.107842	0.815443	-0.455448	0.284546	0.0936094	0.895599	0.0587165	NA	-0.146905	NA	-0.112013	0.999179	-0.821569	0.000297318	0.376705	0.730378
ACKR3	NM_020311	658.084	0.0540943	0.926711	-0.865028	0.00134777	-0.911444	0.000492802	0.00767845	1	-0.178769	0.749871	-0.734446	0.0168033	-0.804661	0.00936298	-0.248985	0.890405	-1.7669	9.06e-16	-0.232551	0.838712
ACKR4	NM_016557	6.76008	0.128296	NA	0.723601	NA	1.11418	NA	0.518881	NA	0.516498	NA	-0.252013	NA	-0.0868191	NA	0.681691	NA	0.557132	0.528751	0.388664	NA
ACLY	NM_001303274	53532.4	0.0795502	0.587969	0.106351	0.472386	0.0299545	0.854726	0.00315399	1	0.036296	0.862401	0.241334	0.0131236	0.170722	0.167538	-0.034316	0.999179	-0.166853	0.0349615	-0.0429037	0.925947
ACMSD	NM_001307983	0.495198	0.945782	NA	-0.987036	NA	1.16935	NA	3.10205	NA	-1.95098	NA	-1.02681	NA	1.11975	NA	0.195641	NA	0.81796	NA	-2.89679	NA
ACO1	NM_001278352	3028.32	0.00992403	0.956516	0.0848627	0.567509	0.042874	0.755107	-0.0320647	1	-0.109128	0.374602	0.127482	0.275315	0.16381	0.151532	-0.0728004	0.890405	-0.354487	2.42e-07	-0.118713	0.724838
ACO2	NM_001098	37036.6	0.0837157	0.579531	0.0556559	0.794173	-0.0278966	0.871531	0.000163249	1	0.045714	0.823106	0.0725343	0.681885	0.0220702	0.963749	-0.00475012	0.999179	-0.111546	0.19414	-0.0376613	0.938129
ACOD1	NM_001258406	0.0800906	0.883456	NA	0.936486	NA	-0.936541	NA	-0.98955	NA	0	NA	0	NA	0	NA	0	NA	-0.0325799	NA	-1.02142	NA
ACOT1	NM_001037161	102.252	0.00081642	0.998556	-0.132307	0.826138	-0.263323	0.450981	-0.1302	1	0.0435238	0.955982	-0.284661	0.571452	-0.137449	0.903057	0.190736	0.977057	-1.2066	4.36e-08	0.043147	0.977627
ACOT11	NM_147161	71.6021	-0.1255	0.822455	0.0554521	0.944562	0.300143	0.456473	0.119191	1	0.176087	0.776313	0.0378973	0.968643	-0.120929	0.922725	0.0172615	0.999179	-0.33568	0.232238	0.301909	0.802978
ACOT12	NM_130767	0.640748	0.869776	NA	-0.912654	NA	-0.482517	NA	1.29983	NA	-1.06704	NA	-1.10466	NA	0.985885	NA	1.02351	NA	0.00837352	NA	-1.93538	NA
ACOT13	NM_018473	4372.54	0.0214951	0.913096	0.089928	0.606259	0.0942754	0.471322	0.0258425	1	0.0267479	0.9111	0.0567228	0.774026	0.08498	0.727928	0.055005	0.989185	-0.0456501	0.634137	0.00561605	0.993936
ACOT2	NM_001364178	961.92	0.0598976	0.840318	0.0219199	0.959362	-0.129765	0.574787	-0.0917875	1	0.0137223	0.97545	0.0242587	0.96106	-0.0406093	0.962272	-0.0511457	0.999179	-1.29729	1.72e-24	-0.0457598	0.961295
ACOT4	NM_152331	81.8901	-0.101633	0.837245	-0.122687	0.848802	-0.0103694	0.985806	0.0106846	1	-0.335619	0.494293	-0.618059	0.123944	0.00713778	0.997455	0.289578	0.888079	-1.34228	6.06e-09	-0.233705	0.84868
ACOT6	NM_001365788	0.0365249	0	NA	0	NA	0	NA	0	NA	0	NA	0.785695	NA	0	NA	-0.766036	NA	-0.0323041	NA	-0.0753984	NA
ACOT7	NM_181866	12086.3	0.144718	0.386355	0.0636827	0.809593	-0.00606995	0.98071	0.074965	1	0.168166	0.268196	0.103763	0.602917	0.047973	0.917217	0.112377	0.815271	-0.225202	0.0213715	0.0238012	0.971012
ACOT8	NM_005469	2592.65	0.0930125	0.547157	0.091012	0.610193	-0.0678549	0.646086	-0.0658544	1	-0.0117824	0.962673	-0.0577713	0.774806	0.00524707	0.99057	0.051236	0.99388	0.00990807	0.926096	-0.104426	0.787873
ACOT9	NM_001037171	4183.38	0.0108469	0.948109	-0.0195014	0.927556	-0.00666658	0.968146	0.0236817	1	0.0261292	0.88925	0.0352654	0.837351	0.00425826	0.99057	-0.00487792	0.999179	0.451447	3.08e-13	0.0156146	0.971992
ACOX1	NM_004035	6566.66	-0.00380275	0.983156	0.0201577	0.925451	-0.000710697	0.99628	-0.0246711	1	0.00297269	0.989742	0.0854586	0.495449	0.0471016	0.854889	-0.0353842	0.999179	0.171552	0.0100274	0.0070756	0.98991
ACOX2	NM_003500	0.159115	0	NA	0	NA	0	NA	0	NA	-1.94521	NA	-1.02105	NA	1.1197	NA	0.195694	NA	1.77385	NA	-1.88139	NA
ACOX3	NM_003501	3651.44	0.0685652	0.589516	0.015033	0.943751	-0.055391	0.643123	-0.00185887	1	-0.0365175	0.833217	0.0293729	0.87698	0.0934931	0.554726	0.0276027	0.999179	0.12027	0.0857273	-0.104752	0.7388
ACOXL	NM_001142807	684.352	0.093144	0.82315	0.0393419	0.948151	0.199717	0.522095	0.25352	0.763018	0.337684	0.191141	0.307364	0.275457	0.223973	0.613239	0.254293	0.635276	1.91978	3.47e-30	0.244896	0.772641
ACOXL-AS1	NR_122074	0.715321	0.545862	NA	0.751694	NA	0.852597	NA	0.646768	NA	0.727116	NA	-2.02114	NA	0.40454	NA	3.15273	NA	0.850937	NA	0.181534	NA
ACP1	NM_004300	10746.7	-0.0281708	0.749004	0.0063089	0.963937	0.0639085	0.313755	0.0294288	1	0.0198292	0.862191	0.0628819	0.391831	0.0558985	0.596454	0.0128457	0.999179	0.00322471	0.955316	0.0483176	0.808948
ACP2	NM_001610	2804.32	0.331315	0.000753234	0.0533596	0.825439	-0.113768	0.398253	0.164187	0.391128	0.240517	0.0232727	0.0309543	0.901467	-0.015647	0.97797	0.193916	0.173141	0.797819	1.28e-23	-0.0904919	0.825091
ACP4	NM_033068	0.631836	1.4656	NA	0.93649	NA	0.462765	NA	0.991846	NA	2.62523	NA	1.6822	NA	0.606672	NA	1.54966	NA	-0.032316	NA	1.1597	NA
ACP5	NM_001111035	1511.24	-0.0244817	0.929261	-0.00412824	0.991723	0.201676	0.191484	0.181323	0.541347	-0.197716	0.221691	0.0407702	0.894172	0.183887	0.374179	-0.0545993	0.999179	0.674564	2.6e-11	-0.172933	0.733753
ACP6	NM_001323625	504.599	-0.348452	0.00350737	0.0532823	0.850192	0.287915	0.0206373	-0.113819	0.870706	-0.0571819	0.832538	0.0083686	0.981299	0.0987561	0.770976	0.0332056	0.999179	-0.475736	1.03e-06	0.291578	0.575807
ACP7	NM_001363687	0.193975	0	NA	0	NA	0	NA	0	NA	0	NA	3.04561	NA	0	NA	-3.02569	NA	-0.0321411	NA	-0.0756429	NA
ACPP	NM_001134194	6.86813	-0.608368	NA	-0.784777	NA	1.0859	NA	1.2623	NA	0.728205	NA	0.544598	NA	0.113185	NA	0.296792	NA	1.71744	0.0591171	1.33679	NA
ACR	NM_001097	0.0647624	0	NA	0	NA	0	NA	0	NA	1.50373	NA	0	NA	-1.48401	NA	0	NA	-0.032255	NA	1.56693	NA
ACRBP	NM_032489	140.244	-0.164238	0.699737	-0.0264304	0.969111	0.063728	0.890975	-0.0740799	1	-0.299899	0.59373	0.0937769	0.910323	0.0580756	0.976408	-0.335601	0.797035	-2.58541	3.83e-30	-0.135238	0.928619
ACRV1	NM_001612	6.5824	0.867721	NA	0.427688	NA	-0.614256	NA	-0.174224	NA	0.737912	NA	-0.323065	NA	-2.4471	NA	-1.38613	NA	-1.13086	0.277485	-0.129329	NA
ACSBG1	NM_015162	130.127	0.189015	0.611261	0.0324636	0.958376	-0.215067	0.497419	-0.0585155	1	0.158934	0.697804	-0.154162	0.725052	-0.140035	0.839337	0.173061	0.927516	0.275882	0.182817	-0.0297458	0.983326
ACSBG2	NM_001289180	5.09394	1.18809	NA	0.547849	NA	-0.724676	NA	-0.0844323	NA	0.164797	NA	-0.0707618	NA	-1.26267	NA	-1.02711	NA	0.110927	0.919926	-1.02281	NA
ACSF2	NM_025149	1293.97	0.0790364	0.573119	0.0831945	0.601361	-0.130098	0.225391	-0.134256	0.449892	-0.0868432	0.51758	-0.102276	0.425734	0.0413773	0.899841	0.0568098	0.969881	0.36685	1.46e-07	-0.165583	0.660423
ACSF3	NR_104293	4924.21	-0.0359121	0.72145	0.0299571	0.824212	0.0613181	0.426156	-0.0045511	1	-0.117492	0.0746228	-0.00917331	0.958397	0.0954692	0.266427	-0.0128493	0.999179	-0.1497	0.00188784	-0.0812542	0.719138
ACSL1	NM_001995	17449.6	0.00919321	0.932524	0.206135	6.94e-06	0.222665	6.92e-07	0.025723	1	0.0499852	0.528736	0.206056	6.15e-06	0.194639	3.4e-05	0.0385682	0.927623	0.574397	3.75e-49	0.0410877	0.844105
ACSL3	NM_004457	9765.04	0.0319467	0.878084	0.251927	0.0297437	0.237829	0.0352684	0.0178483	1	0.147606	0.307653	0.336944	0.00132553	0.199536	0.160839	0.0101982	0.999179	0.152223	0.108091	0.115985	0.782565
ACSL4	NM_001318510	11863.6	-0.0434737	0.826887	0.15038	0.328798	0.26454	0.0160081	0.0706864	1	0.158989	0.256381	0.181372	0.185538	0.042885	0.921173	0.0205018	0.999179	0.182107	0.0503365	0.202742	0.660423
ACSL5	NM_016234	11002.1	0.228111	2.74e-07	-0.0352124	0.749337	-0.0955173	0.0970538	0.167806	0.00076848	0.156444	0.00156963	-0.0312334	0.769054	-0.0967193	0.160117	0.0909578	0.262709	-0.185406	8.04e-06	-0.0713428	0.720949
ACSL6	NM_001205248	2.50365	-0.489248	NA	-1.49133	NA	-0.347244	NA	0.65483	NA	0.372772	NA	-0.587188	NA	1.12879	NA	2.08874	NA	-1.80402	0.216053	0.862114	NA
ACSM1	NM_052956	5.59745	0.356902	NA	0.368639	NA	-0.444697	NA	-0.456434	NA	0.313313	NA	0.143258	NA	-0.203167	NA	-0.0331128	NA	1.91298	0.0488485	-0.0433646	NA
ACSM2A	NM_001308954	0.0877802	0	NA	0	NA	0	NA	0	NA	0.823302	NA	0	NA	0.158108	NA	1.15735	NA	-0.0323388	NA	0.886433	NA
ACSM2B	NM_001105069	0.288063	0	NA	0	NA	0	NA	0	NA	0.823244	NA	3.02898	NA	0.15805	NA	-2.04735	NA	-0.0321076	NA	0.886086	NA
ACSM3	NM_202000	430.458	0.328645	0.0909524	0.130683	0.683927	-0.0181655	0.956953	0.179796	0.771745	0.41485	0.00560529	0.16484	0.494083	-0.0573575	0.923981	0.192652	0.601294	0.721208	1.28e-08	0.0865326	0.905942
ACSM4	NM_001080454	0.503527	-0.78057	NA	-0.729668	NA	0.939639	NA	0.888735	NA	-0.709688	NA	-0.699232	NA	-1.68651	NA	-1.69696	NA	0.717253	NA	0.0711013	NA
ACSM5	NM_001324373	1.39023	-0.417425	NA	1.36345	NA	0.690782	NA	-1.09007	NA	-0.0912957	NA	-2.06739	NA	-2.74221	NA	-0.766159	NA	-0.0918914	0.975843	0.326631	NA
ACSM6	NM_207321	0.226159	-1.39624	NA	-2.30498	NA	-0.936584	NA	0	NA	0	NA	0	NA	1.93561	NA	1.97323	NA	-2.31232	NA	1.25812	NA
ACSS1	NM_032501	6060.24	-0.111713	0.340656	0.12133	0.288753	0.0872818	0.422927	-0.145761	0.260879	-0.0686569	0.63807	0.144058	0.175189	0.160369	0.145879	-0.0523461	0.979999	-1.06514	1.19e-62	0.0433796	0.914091
ACSS2	NM_018677	1448.68	0.620507	1.36e-05	0.253567	0.238515	0.180784	0.379029	0.547725	0.000281938	0.67898	2.12e-06	0.572485	0.000230503	0.512946	0.00150581	0.61944	2.64e-05	-0.860288	2.47e-11	0.0587616	0.945305
ACSS3	NM_001330242	1.06676	2.08374	NA	0.677086	NA	-1.34107	NA	0.0655613	NA	-0.0354835	NA	-0.150911	NA	-1.39129	NA	-1.27587	NA	0.655859	0.821149	-2.11889	NA
ACTA1	NM_001100	13.9798	0.69501	NA	-0.230316	NA	-0.320997	NA	0.604329	0.928205	-0.946771	NA	-0.579335	NA	0.212975	NA	-0.154461	0.999179	0.817738	0.176426	-1.64121	0.568164
ACTA2	NM_001141945	4095.05	0.213259	0.414282	-0.10516	0.792993	-0.103759	0.708072	0.21466	0.705322	-0.142192	0.646015	-0.336315	0.117232	-0.0582252	0.938165	0.135898	0.927626	0.981205	2.07e-12	-0.355205	0.647548
ACTA2-AS1	NR_125373	85.9818	0.381532	0.322998	-0.0498289	0.947149	-0.0656976	0.89417	0.365664	0.596406	0.661961	0.0111393	0.0575173	0.934819	-0.182486	0.793805	0.421957	0.335207	0.253614	0.322862	0.280786	0.788157
ACTB	NM_001101	2.98998e+06	0.082538	0.704518	0.139276	0.506615	0.0739704	0.708072	0.0172321	1	0.0738929	0.770987	0.167839	0.355999	0.0994545	0.777683	0.00550862	0.999179	-0.0996354	0.406424	-0.00829001	0.993421
ACTBL2	NM_001017992	0.806992	1.05484	NA	-0.0252511	NA	-1.10794	NA	-0.0278812	NA	1.0647	NA	-0.144704	NA	-1.57241	NA	-0.36303	NA	1.42703	NA	0.00955325	NA
ACTC1	NM_005159	0.669915	-0.0723621	NA	-0.0252453	NA	0.0192431	NA	-0.0278754	NA	-0.724349	NA	0.545408	NA	0.672047	NA	-0.597689	NA	1.45801	NA	-0.652234	NA
ACTG1	NR_037688	856368	0.0713756	0.602777	-0.0555759	0.767404	-0.133225	0.191604	-0.00627386	1	-0.0112768	0.960615	-0.0539217	0.75347	-0.0497477	0.862569	-0.00710276	0.999179	-0.63271	1.3e-21	-0.0823068	0.807385
ACTG1P17	NR_036446	105.769	-0.104711	0.807819	-0.0763799	0.902959	-0.0468413	0.919601	-0.0751724	1	0.238301	0.520568	0.0534894	0.932817	-0.084745	0.928783	0.100067	0.999179	-0.21473	0.33712	0.343314	0.713338
ACTG1P20	NR_033926	333.008	-0.254719	0.378562	-0.0663529	0.898438	0.19114	0.483676	0.00277439	1	0.0690742	0.89101	-0.0618237	0.907441	-0.0962428	0.904409	0.0346552	0.999179	-0.983257	1.31e-09	0.324056	0.695068
ACTG1P4	NR_024438	22.6349	-0.154423	0.88497	0.251362	NA	0.593139	0.393037	0.187354	1	0.836492	0.275124	0.765988	NA	-0.0465854	NA	0.0239178	0.999179	-0.882291	0.0842898	0.991114	0.673243
ACTG2	NM_001615	7.02272	1.12571	NA	0.188711	NA	-1.59383	NA	-0.656838	NA	-0.286259	NA	0.112262	NA	-0.0940362	NA	-0.492557	NA	1.75419	0.0439628	-1.4119	NA
ACTL10	NM_001024675	195.991	-0.294495	0.22543	0.0510574	0.91427	0.135804	0.614176	-0.209748	0.733811	-0.425617	0.0729462	-0.221775	0.500613	0.117484	0.876	-0.0863582	0.999179	-1.1799	5.46e-15	-0.130852	0.880674
ACTL6A	NM_004301	8094.2	-0.0152015	0.923489	-0.0412717	0.811906	-0.0470607	0.684455	-0.0209906	1	0.0102479	0.959874	-0.0343259	0.837433	-0.0808607	0.627818	-0.0362869	0.996684	-0.577064	7.15e-23	0.0257783	0.948719
ACTL6B	NM_016188	0.365057	-0.0775412	NA	-0.987021	NA	0.024439	NA	0.933832	NA	-2.55214	NA	-2.58976	NA	2.52187	NA	2.55949	NA	1.41937	NA	-2.47412	NA
ACTL7A	NM_006687	0.724125	2.33321	NA	0.936497	NA	-2.38633	NA	-0.989676	NA	3.18508	NA	3.26041	NA	-0.792932	NA	-0.868257	NA	-0.0323204	NA	0.8516	NA
ACTL7B	NM_006686	1.69469	-2.34585	NA	-3.6551	NA	-0.447854	NA	0.861368	NA	-1.32418	NA	0.191921	NA	0.122054	NA	-1.39404	NA	-0.961178	0.520535	1.02144	NA
ACTL8	NM_030812	5.31689	-0.0580978	NA	0.796137	NA	-0.478812	NA	-1.33305	NA	0.195342	NA	0.228188	NA	0.019744	NA	-0.0131021	NA	-1.89823	0.0997402	0.25425	NA
ACTL9	NM_178525	0	NA	NA	NA	NA	NA	NA	NA	NA	NA	NA	NA	NA	NA	NA	NA	NA	NA	NA	NA	NA
ACTN1	NM_001102	2269.42	-0.143039	0.625102	0.0216449	0.965014	0.0433944	0.89748	-0.12129	1	-0.188898	0.474831	0.114972	0.739144	0.179512	0.649248	-0.124358	0.951888	1.89261	9.77e-44	-0.045548	0.966235
ACTN1-AS1	NR_073422	0.187633	0	NA	0	NA	0	NA	0	NA	1.59552	NA	1.70234	NA	-0.614081	NA	-0.720881	NA	-0.0321476	NA	1.65866	NA
ACTN2	NM_001278343	4.42005	0.630738	NA	-0.441662	NA	-0.701818	NA	0.370578	NA	-0.357312	NA	0.150453	NA	-0.837983	NA	-1.34575	NA	1.03653	0.332336	-0.987539	NA
ACTN3	NM_001104	122.758	-0.0191776	0.97713	0.442725	0.249192	0.220638	0.599943	-0.241265	0.934001	0.451008	0.523466	-0.174973	0.879709	-0.441522	0.678064	0.184458	0.999179	-3.6974	6.17e-34	0.470416	0.752726
ACTN4	NM_004924	71958.3	0.160829	0.194654	0.0334069	0.890508	-0.0861178	0.514468	0.0413045	1	0.0272343	0.908472	0.0645482	0.727792	0.0627534	0.829989	0.0254395	0.999179	0.0516121	0.580353	-0.133251	0.719138
ACTR10	NM_018477	2597.9	-0.0393911	0.795963	-0.0116171	0.959766	0.0284857	0.850935	0.000711662	1	-0.0231701	0.913096	-0.115788	0.340768	-0.0187625	0.966357	0.0738556	0.885769	-0.120129	0.113684	0.0165085	0.971992
ACTR1A	NM_005736	18897.7	0.0658778	0.531069	0.0556459	0.668437	-0.00221665	0.988494	0.00801518	1	0.0286547	0.85174	0.0665727	0.554561	0.0300078	0.910036	-0.00791019	0.999179	-0.116486	0.0459722	-0.0368941	0.907564
ACTR1B	NM_005735	9505.75	-0.000692745	0.996773	0.0430343	0.816239	-0.0491343	0.690503	-0.0928613	0.740988	-0.0894496	0.452959	0.0191562	0.926103	0.0566864	0.808432	-0.0519194	0.973482	0.24565	0.000158543	-0.0884375	0.77759
ACTR2	NM_005722	84081.9	-0.0952059	0.62781	0.0861185	0.732247	0.170826	0.247835	-0.0104982	1	0.122619	0.515627	0.13789	0.456053	-0.00574892	0.991792	-0.0210198	0.999179	-0.363875	0.000216581	0.218105	0.671268
ACTR3	NR_102318	66933	-0.0996944	0.59687	0.142183	0.44133	0.255045	0.0423591	0.0131681	1	0.0544	0.832433	0.139155	0.432822	0.0752434	0.838083	-0.00951172	0.999179	-0.232793	0.020225	0.154366	0.738891
ACTR3-AS1	NR_110174	151.218	0.162765	0.644353	0.18607	0.644489	-0.423551	0.0815085	-0.446856	0.127	0.0098648	0.984954	-0.0316245	0.954126	-0.0102255	0.989931	0.0312637	0.999179	1.04666	5.65e-11	-0.152671	0.854023
ACTR3B	NM_020445	1325.04	-0.0606649	0.739542	-0.0804369	0.699836	-0.130142	0.328526	-0.11037	0.816342	-0.221683	0.0621593	-0.0474288	0.838826	0.0272068	0.958423	-0.147047	0.531544	-0.368112	1.51e-05	-0.160719	0.701235
ACTR3BP2	NR_027714	0.0381486	0	NA	0	NA	0	NA	0	NA	0.823319	NA	0	NA	-0.803654	NA	0	NA	-0.0323041	NA	0.886364	NA
ACTR3BP5	NR_045000	0	NA	NA	NA	NA	NA	NA	NA	NA	NA	NA	NA	NA	NA	NA	NA	NA	NA	NA	NA	NA
ACTR3C	NM_001164458	190.738	0.406335	0.118257	-0.0344108	0.952887	-0.151953	0.623128	0.288793	0.579346	0.503811	0.020362	0.145229	0.723468	-0.093193	0.905718	0.265389	0.600532	0.0605481	0.787811	0.0977819	0.925947
ACTR5	NM_024855	1312.17	-0.0497013	0.710341	-0.0809602	0.539595	-0.0420698	0.734941	-0.0108109	1	-0.0448569	0.785804	0.0188176	0.92895	0.0193364	0.963448	-0.0443381	0.989185	-0.537289	4.35e-18	0.00512846	0.993421
ACTR6	NR_048569	1356.91	-0.396715	0.301425	-0.147534	0.815981	0.323961	0.357191	0.0747799	1	0.0397951	0.957375	-0.110909	0.862312	-0.110667	0.920237	0.0400374	0.999179	-0.215577	0.406921	0.436687	0.695068
ACTR8	NM_022899	5921.63	-0.0164461	0.84658	0.00639447	0.957416	-0.0341593	0.609552	-0.0569999	0.654011	-0.0558713	0.385665	0.0584366	0.363604	0.047961	0.625982	-0.066347	0.451931	0.0241441	0.587137	-0.0391498	0.826689
ACTRT1	NM_138289	0	NA	NA	NA	NA	NA	NA	NA	NA	NA	NA	NA	NA	NA	NA	NA	NA	NA	NA	NA	NA
ACTRT2	NM_080431	0	NA	NA	NA	NA	NA	NA	NA	NA	NA	NA	NA	NA	NA	NA	NA	NA	NA	NA	NA	NA
ACTRT3	NM_032487	81.2084	0.00621248	0.993078	0.0755865	0.93097	0.174763	0.729419	0.105389	1	-0.101606	0.897343	-0.00263535	0.998175	0.336696	0.631258	0.237725	0.935989	-0.0475874	0.891403	-0.107404	0.95004
ACVR1	NM_001347663	77.8332	0.325579	0.37977	-0.25412	0.59897	-0.694149	0.00866424	-0.11445	1	-0.150759	0.756401	-0.020426	0.979504	-0.124066	0.895065	-0.254399	0.787692	0.382998	0.0869877	-0.476213	0.660423
ACVR1B	NM_004302	176.582	-0.327691	0.443857	0.10438	0.88484	0.111474	0.825085	-0.320597	0.769587	-0.234253	0.62199	0.130256	0.827292	0.196851	0.811757	-0.167658	0.983954	0.444726	0.0707247	0.0936143	0.951148
ACVR1C	NM_145259	14.0295	-0.00903715	NA	0.770858	NA	-0.0399238	NA	-0.819818	0.724769	0.086607	NA	0.575529	NA	-0.369788	NA	-0.85871	0.420175	1.41386	0.0119221	0.0956198	0.979615
ACVR2A	NM_001616	256.35	-0.212689	0.607303	0.00490477	0.995758	0.227032	0.529234	0.00943879	1	-0.205278	0.644398	-0.0143318	0.985815	0.156676	0.847925	-0.0342695	0.999179	0.120073	0.636657	0.00762892	0.997834
ACVR2B	NM_001106	600.973	-0.184097	0.6213	-0.191107	0.663567	-0.117169	0.752294	-0.110159	1	-0.194536	0.635954	-0.310815	0.362527	-0.261578	0.609608	-0.1453	0.983954	-1.2244	2.47e-11	-0.0102775	0.995952
ACVR2B-AS1	NR_028389	13.461	0.549481	NA	0.315459	NA	-0.394838	NA	-0.160816	1	0.0822007	NA	-0.599546	NA	-0.296085	NA	0.385661	0.994484	-0.754135	0.219369	-0.466822	0.866892
ACVRL1	NM_001077401	25.2777	-0.723458	0.491004	0.613012	NA	0.73778	0.417419	-0.598688	0.836761	-0.101694	0.920091	0.204524	NA	0.317608	NA	0.0113904	0.999179	2.20609	1.92e-07	0.622112	0.779625
ACY1	NM_000666	2084.64	0.0719266	0.663602	0.153856	0.252615	0.034424	0.844229	-0.047505	1	-0.00252159	0.992899	0.10781	0.492436	0.0772176	0.778664	-0.0331139	0.999179	-0.0301338	0.771856	-0.0741125	0.859787
ACY3	NM_080658	541.508	-0.104684	0.769634	0.12303	0.782336	0.12966	0.669814	-0.0980541	1	-0.153237	0.673465	-0.0396793	0.94291	0.187264	0.703833	0.0737059	0.999179	-0.261674	0.145615	-0.0481965	0.966235
ACYP1	NR_126393	750.484	-0.0920575	0.522194	-0.0530956	0.802359	0.117551	0.313159	0.0785895	0.934486	-0.0543016	0.776941	-0.128032	0.344436	-0.148459	0.319228	-0.0747287	0.926745	-0.281251	0.000253093	0.0380639	0.936584
ACYP2	NM_138448	539.714	-0.129591	0.523816	-0.0653564	0.830049	0.103379	0.587434	0.0391452	1	-0.0249673	0.935677	-0.00853776	0.981153	0.11987	0.669933	0.10344	0.886619	0.656961	3.85e-11	0.104899	0.837104
ADA	NM_000022	14135.7	-0.0422855	0.832254	0.247642	0.0359284	0.241933	0.0334358	-0.0479939	1	-0.00554973	0.985714	0.137937	0.375543	0.10604	0.674836	-0.0374461	0.999179	0.826751	4.36e-23	0.0370484	0.948677
ADA2	NM_001282225	3598.44	0.0178519	0.951106	-0.0601724	0.855608	-0.0531779	0.823405	0.0248463	1	0.00901075	0.98097	0.0988815	0.694225	0.0418844	0.940572	-0.0479863	0.999179	1.6273	2.28e-55	-0.00848938	0.99346
ADAD1	NM_001159285	0.124033	-1.90897	NA	-0.909685	NA	0	NA	-0.989566	NA	0	NA	0	NA	0	NA	0	NA	-1.87923	NA	1.77141	NA
ADAD2	NM_001145400	37.4612	-0.178055	0.85988	0.236826	0.849054	0.0548886	0.960827	-0.359992	0.999902	-0.236117	0.815102	-0.408847	NA	0.0649097	NA	0.23764	0.994484	1.17149	0.00487547	-0.057914	0.985475
ADAL	NM_001324368	1193	-0.0697732	0.62781	0.0121413	0.959075	0.0907689	0.441277	0.00885435	1	0.0567534	0.735448	0.0529001	0.764068	-0.0299235	0.932862	-0.0260703	0.999179	0.0537037	0.530692	0.126797	0.713338
ADAM10	NM_001110	13007.3	-0.17816	0.239991	-0.0464499	0.863624	0.0967476	0.542707	-0.0349624	1	-0.0218233	0.93892	-0.0175305	0.958563	-0.0534567	0.900639	-0.0577496	0.99388	0.253224	0.00694925	0.156575	0.719138
ADAM11	NM_002390	27.2925	-0.235086	0.782103	-0.145914	NA	0.231666	0.763339	0.142494	1	0.0318505	0.976847	-0.238145	NA	0.199697	NA	0.469692	0.696286	0.743077	0.0521432	0.267192	0.895522
ADAM12	NM_001288973	12.8085	-1.09611	NA	-0.349701	NA	-0.0616971	NA	-0.808106	0.862007	-0.116354	NA	0.349767	NA	-0.189829	NA	-0.655949	0.835542	0.424203	0.542865	0.980156	0.738891
ADAM15	NM_207197	1896.03	0.091221	0.597241	-0.078763	0.726059	-0.142012	0.293204	0.0279722	1	-0.157517	0.275124	-0.0379822	0.883638	0.0358477	0.938325	-0.0836872	0.927626	-0.191501	0.0407735	-0.248435	0.589345
ADAM17	NM_003183	3644.87	-0.0552044	0.690774	-0.0594038	0.726553	0.0179713	0.908709	0.0221707	1	0.101433	0.380099	0.0209558	0.920529	-0.0460282	0.867694	0.0344489	0.999179	0.142285	0.0436515	0.156933	0.654537
ADAM18	NR_135201	1.67938	-1.45366	NA	-0.791012	NA	-2.19944	NA	-2.86208	NA	-1.03486	NA	0.487542	NA	-2.00651	NA	-3.52891	NA	0.39031	0.817752	0.418705	NA
ADAM19	NM_033274	16393.3	0.0401794	0.893756	0.506495	0.000512594	0.511089	0.000365671	0.0447731	1	0.039766	0.916383	0.389235	0.0169098	0.370821	0.0331146	0.0213521	0.999179	1.46705	2.52e-35	-7.23e-05	0.999751
ADAM1A	NR_036636	679.555	0.059752	0.843306	-0.0735405	0.849776	-0.0477719	0.869595	0.0855207	1	-0.00811286	0.986025	-0.107054	0.737142	-0.128602	0.773552	-0.0296608	0.999179	-0.104424	0.50565	-0.0675612	0.933595
ADAM2	NM_001278114	0.0406385	0	NA	0	NA	0	NA	0	NA	0	NA	0	NA	1.11975	NA	1.15737	NA	-0.0324081	NA	-0.075225	NA
ADAM20	NM_003814	3.44395	-0.370316	NA	-1.00429	NA	0.526952	NA	1.16092	NA	-0.39121	NA	-1.26501	NA	-0.960489	NA	-0.0866953	NA	1.39617	0.20453	-0.0209761	NA
ADAM20P1	NR_037933	4	-1.91849	NA	-0.464409	NA	1.41738	NA	-0.0366799	NA	-1.02011	NA	-1.11908	NA	0.329057	NA	0.428024	NA	2.04162	0.0534908	0.898618	NA
ADAM21	NM_003813	21.3067	0.348651	0.762747	0.453673	NA	-0.464739	NA	-0.569761	0.925425	-0.178091	0.893517	-0.122039	NA	0.201039	NA	0.144986	0.999179	1.53279	0.00260098	-0.526501	0.826294
ADAM21P1	NR_003951	4.75661	-0.909517	NA	0.987391	NA	0.934558	NA	-0.962342	NA	-0.542659	NA	-0.239693	NA	0.652474	NA	0.349508	NA	0.968691	0.410862	0.366559	NA
ADAM22	NM_021721	1663.51	-0.0717126	0.652076	0.0180339	0.943751	0.0138222	0.944004	-0.0759244	0.958689	0.0101102	0.966853	0.178357	0.114394	0.116383	0.513086	-0.0518633	0.989185	0.286131	0.00021376	0.0821298	0.827132
ADAM23	NM_003812	8196.5	-0.07378	0.929832	0.295148	0.713822	0.259879	0.664965	-0.109049	1	0.0465359	0.963723	0.31695	0.664175	0.0453416	0.983772	-0.225073	0.989185	-2.77706	2.55e-19	0.120627	0.957176
ADAM28	NM_021777	28.5968	-0.275957	0.766641	-0.0286324	NA	0.0918288	0.929805	-0.155496	1	0.753161	0.583983	0.325847	NA	-0.410416	NA	0.0168973	0.999373	-3.77553	1.07e-10	1.02945	0.707743
ADAM29	NM_001130705	1.19491	-3.7268	NA	-0.931404	NA	0.971403	NA	-1.82394	NA	-1.04664	NA	2.50382	NA	0.999789	NA	-2.55062	NA	-1.8265	0.406424	2.68058	NA
ADAM30	NM_021794	0.0427758	0	NA	0	NA	0.971371	NA	0.93387	NA	0	NA	0	NA	0	NA	0	NA	-0.0323214	NA	-0.0753984	NA
ADAM32	NM_001313994	5.65882	0.37273	NA	-0.0855846	NA	-0.16209	NA	0.296223	NA	0.333472	NA	-0.302567	NA	0.607736	NA	1.24377	NA	-0.434875	0.67326	-0.0386466	NA
ADAM33	NM_153202	0.3213	0.88409	NA	0	NA	-0.937269	NA	0	NA	-1.1002	NA	1.29182	NA	2.70567	NA	0.313879	NA	0.929353	NA	-1.98405	NA
ADAM3A	NR_073423	0.163425	0	NA	0	NA	0	NA	0	NA	-0.138356	NA	-0.175981	NA	0.158073	NA	0.195692	NA	0.929389	NA	-0.0752596	NA
ADAM3B	NR_144553	0.182625	0	NA	0	NA	0	NA	0	NA	0	NA	2.96075	NA	0	NA	-2.94083	NA	-0.0321472	NA	-0.0756337	NA
ADAM5	NR_001448	0.0794336	0	NA	0	NA	0	NA	0	NA	0	NA	0.785677	NA	1.11973	NA	0.195726	NA	-0.0323388	NA	-0.075329	NA
ADAM6	NR_002224	0.122012	0	NA	1.70948	NA	0	NA	-1.76245	NA	-1.10011	NA	-1.13774	NA	0	NA	0	NA	0.929097	NA	-1.0366	NA
ADAM7	NM_003817	0.269364	0.883385	NA	0	NA	-0.936596	NA	0	NA	-2.61955	NA	-0.25656	NA	0	NA	-2.20473	NA	2.44891	NA	-3.50287	NA
ADAM8	NM_001109	19004.1	-0.0984367	0.37977	-0.108146	0.329316	-0.162418	0.0510329	-0.152708	0.151551	-0.156476	0.0701963	-0.129773	0.189041	-0.0662818	0.741639	-0.092985	0.653772	0.262135	2.42e-05	-0.0577357	0.857938
ADAM9	NM_003816	6065.92	-0.109039	0.456407	0.078888	0.680759	0.19844	0.0652109	0.0105133	1	0.0456636	0.830804	0.117467	0.42377	0.0422123	0.915845	-0.0295905	0.999179	0.0663244	0.485779	0.154983	0.695125
ADAMDEC1	NM_014479	36.3096	0.266648	0.74894	0.413596	0.640331	0.0955991	0.915991	-0.0513485	1	0.324209	0.722373	0.152659	NA	-0.266977	NA	-0.0954276	0.999179	-0.14834	0.770212	0.0579171	0.985352
ADAMTS1	NM_006988	0.161171	0	NA	0	NA	0	NA	0	NA	-1.10013	NA	0.760614	NA	1.1197	NA	-0.740753	NA	0.344451	NA	-1.03705	NA
ADAMTS10	NM_030957	4.31593	-0.313752	NA	0.561709	NA	0.389631	NA	-0.485827	NA	-1.54726	NA	-0.596533	NA	1.67641	NA	0.725693	NA	-1.12883	0.331926	-1.23364	NA
ADAMTS12	NM_001324511	626.983	-0.111239	0.492338	0.323692	0.00126789	0.423223	5.68e-06	-0.011708	1	-0.0699288	0.707906	0.0932405	0.573684	0.0619074	0.844952	-0.101262	0.785596	0.415226	4.56e-07	0.0416402	0.936658
ADAMTS13	NM_139027	277.581	0.0426446	0.939454	-0.18105	0.743754	-0.216547	0.562027	0.00714761	1	-0.181554	0.680958	-0.0793156	0.893394	0.160506	0.830044	0.0582676	0.999179	1.19437	1.87e-09	-0.223928	0.824657
ADAMTS14	NM_080722	9.80235	0.419265	NA	0.816072	NA	-0.339192	NA	-0.735998	0.905733	0.0173036	NA	0.233317	NA	0.19343	NA	-0.0225835	0.999179	0.0444705	0.963852	-0.401243	NA
ADAMTS15	NM_139055	0.986801	0.314588	NA	1.47594	NA	-2.08213	NA	-3.24345	NA	-3.58313	NA	-0.762756	NA	3.25409	NA	0.433773	NA	1.69801	NA	-3.89825	NA
ADAMTS16	NM_139056	12.3795	-0.120804	NA	-1.29439	NA	0.383808	NA	1.55739	0.531793	-0.317973	NA	-0.148462	NA	-0.657391	NA	-0.826903	0.547137	2.66928	1.55e-05	-0.197014	0.966235
ADAMTS17	NM_139057	40.1645	0.285619	0.70495	-0.114242	0.925599	0.139353	0.853083	0.539214	0.683515	-0.0735735	0.945185	-0.523723	NA	0.101784	NA	0.551933	0.563058	0.756287	0.0406774	-0.358814	0.832806
ADAMTS18	NM_199355	1.24466	3.18086	NA	1.37294	NA	-1.73368	NA	0.0741936	NA	-2.27646	NA	-3.0468	NA	0.362916	NA	1.13323	NA	2.83819	0.342607	-5.45589	NA
ADAMTS19	NM_133638	0.887386	-0.295506	NA	-0.910988	NA	0.205785	NA	0.82126	NA	-0.138271	NA	0.826586	NA	-1.69032	NA	-2.65517	NA	-1.05147	NA	0.156752	NA
ADAMTS19-AS1	NR_125748	0.346551	-0.920776	NA	0.547785	NA	-0.0179705	NA	-1.4864	NA	0	NA	0	NA	1.11973	NA	1.15735	NA	-1.8805	NA	0.783796	NA
ADAMTS2	NM_014244	0.116148	1.67994	NA	0.936472	NA	-1.73295	NA	-0.989564	NA	0	NA	0	NA	0	NA	0	NA	-0.0326661	NA	-1.81755	NA
ADAMTS20	NM_025003	1.09066	3.77684	NA	0	NA	-1.95539	NA	1.84664	NA	-2.38081	NA	-0.193297	NA	2.44311	NA	0.255651	NA	3.17203	0.278131	-6.15743	NA
ADAMTS3	NM_014243	2.0574	-1.47614	NA	-0.0136097	NA	0.68966	NA	-0.77285	NA	-0.277061	NA	-0.536786	NA	0.582087	NA	0.84181	NA	0.225498	0.914849	1.19904	NA
ADAMTS4	NM_005099	30.317	-0.157688	0.845394	-0.872114	NA	-0.267537	0.699329	0.446889	0.901306	0.135752	0.8723	-0.497476	NA	-0.50632	NA	0.126907	0.999179	0.79427	0.0196047	0.293598	0.863324
ADAMTS5	NM_007038	0.765048	-0.0439851	NA	-0.987042	NA	-0.970945	NA	0	NA	-0.162355	NA	0.109983	NA	-2.03853	NA	-2.31086	NA	1.60325	NA	-0.118369	NA
ADAMTS6	NM_197941	509.928	0.251387	0.326488	0.335443	0.12566	0.248221	0.255741	0.164165	0.900024	0.634778	0.000101747	0.232887	0.37239	0.00348214	0.99781	0.405373	0.0576149	-0.0815423	0.655428	0.383702	0.623755
ADAMTS7	NM_014272	144.299	-0.197632	0.749219	-0.233674	0.761397	-0.185749	0.74728	-0.149706	1	-0.488797	0.275124	-0.51491	0.256772	-0.212491	0.844952	-0.186378	0.99044	1.03254	0.000235296	-0.290906	0.834511
ADAMTS7P1	NR_045529	14.4307	0.168445	NA	0.487278	NA	0.127072	NA	-0.191761	1	-0.243008	NA	-0.272633	NA	-0.168558	NA	-0.138933	0.999179	2.18781	0.000371819	-0.411706	0.905298
ADAMTS8	NM_007037	0.339208	0	NA	0.936406	NA	0	NA	-0.98963	NA	0	NA	2.26713	NA	3.14088	NA	0.735569	NA	-0.0324089	NA	-0.0751874	NA
ADAMTS9	NM_001318781	1.01273	0	NA	0.936529	NA	0.971406	NA	-0.0278751	NA	0.158933	NA	0.207453	NA	-1.7964	NA	-1.84492	NA	3.43373	0.126439	0.222064	NA
ADAMTS9-AS1	NR_110151	0.243343	-1.02449	NA	-0.986983	NA	0.971287	NA	0.933786	NA	1.50366	NA	0	NA	0.565586	NA	2.24516	NA	-0.993865	NA	2.52846	NA
ADAMTS9-AS2	NR_038264	0	NA	NA	NA	NA	NA	NA	NA	NA	NA	NA	NA	NA	NA	NA	NA	NA	NA	NA	NA	NA
ADAMTSL1	NM_001040272	25.5372	0.140004	0.867371	-0.0738551	NA	-0.188386	0.797867	0.0254727	1	-0.0292069	0.98271	-0.509937	NA	0.0458997	NA	0.526629	0.764021	-0.539396	0.197139	-0.168779	0.943808
ADAMTSL2	NM_014694	123.005	-0.0137235	0.984241	0.286997	0.611347	0.0750693	0.897587	-0.225651	0.9863	-0.197597	0.747006	0.227414	0.695128	0.228594	0.796892	-0.196417	0.975787	0.108786	0.735096	-0.183474	0.899136
ADAMTSL3	NM_207517	115.225	-0.167063	0.624391	-0.0278633	0.960649	0.376663	0.105663	0.237464	0.74018	0.147047	0.721308	0.346657	0.210508	0.110765	0.883737	-0.0888448	0.999179	-0.379944	0.040407	0.314404	0.708702
ADAMTSL4	NM_025008	6.92873	-2.04347	NA	-0.852085	NA	1.35355	NA	0.162172	NA	-0.119777	NA	-0.147617	NA	-0.392038	NA	-0.364197	NA	0.771962	0.361306	1.92417	NA
ADAMTSL4-AS1	NR_104133	19.0398	1.62645	0.0100053	-0.34867	NA	-1.2474	NA	0.727728	0.78719	0.918231	0.267098	0.292955	NA	-0.0580396	NA	0.567236	0.846477	-0.058375	0.93651	-0.707755	0.770155
ADAMTSL5	NM_001367197	29.8517	-0.365932	0.673959	0.468819	NA	0.281464	0.735344	-0.553288	0.784199	0.46218	0.623774	-0.391051	NA	-0.842724	NA	0.0105067	0.999373	-1.03102	0.0258525	0.828332	0.696946
ADAP1	NM_001284309	2985.88	-0.221383	0.164705	0.0433488	0.891663	0.0671463	0.73727	-0.197585	0.389185	-0.262343	0.0477085	0.0345317	0.911722	0.142342	0.55919	-0.154532	0.604812	1.15192	3.55e-34	-0.0405893	0.950875
ADAP2	NM_018404	142.83	0.388444	0.204255	0.586323	0.0147129	0.176594	0.585453	-0.0212848	1	0.292922	0.344193	0.232502	0.517745	0.343558	0.281893	0.403978	0.19406	0.309844	0.137743	-0.0952299	0.933595
ADAR	NM_001365045	102835	0.324607	0.000142182	0.00253475	0.993311	-0.106183	0.375646	0.21589	0.0491761	0.283082	0.00141117	0.0684494	0.696511	-0.0579423	0.842724	0.15669	0.309402	0.197614	0.0112698	-0.0411997	0.930829
ADARB1	NM_015834	579.441	-0.168144	0.582424	0.0897268	0.844287	0.0473409	0.895719	-0.210529	0.787072	-0.246507	0.38076	0.032527	0.956397	0.0928912	0.902744	-0.186142	0.83582	-1.15633	2.5e-14	-0.0780812	0.937054
ADARB2	NM_018702	455.855	0.00125346	0.99804	-0.0372646	0.956673	-0.14496	0.725223	-0.106442	1	0.303575	0.440474	0.0401762	0.959294	-0.203094	0.78174	0.0603052	0.999179	-0.839379	8.82e-05	0.30264	0.767536
ADARB2-AS1	NR_033387	0.343066	-1.02451	NA	-0.987008	NA	1.70243	NA	1.66493	NA	0	NA	2.97841	NA	1.11969	NA	-1.99687	NA	-0.993768	NA	0.88588	NA
ADAT1	NM_012091	5549.08	-0.0433825	0.76986	0.0414926	0.82952	0.00517158	0.977449	-0.0797035	0.875582	0.012228	0.956765	0.0634386	0.68119	-0.0289176	0.93226	-0.0801282	0.823763	-0.0205502	0.813649	0.0559494	0.877376
ADAT2	NM_001286259	2573.59	-0.132542	0.605062	-0.00518999	0.991723	0.0520912	0.853536	-0.0752607	1	0.146483	0.576158	0.0914732	0.78263	-0.0882766	0.874066	-0.0332672	0.999179	-0.152452	0.303605	0.279299	0.673243
ADAT3	NM_138422	1347.49	0.131039	0.469419	-0.0193564	0.952719	-0.149603	0.328853	0.000792027	1	0.00268934	0.994127	-0.0970121	0.666022	-0.0995282	0.763764	0.000173145	1	-0.274989	0.00697093	-0.127999	0.790524
ADCK1	NM_020421	1355.96	0.0621424	0.822837	-0.0790909	0.820563	-0.11148	0.615552	0.029753	1	0.030054	0.937356	0.0173246	0.970871	-0.0459823	0.942825	-0.0332528	0.999179	0.0452003	0.772511	-0.0317051	0.970536
ADCK2	NM_052853	2494.26	0.0163045	0.926832	-0.132562	0.239949	-0.145812	0.130983	0.00305491	1	-0.0810574	0.551905	-0.0993102	0.436956	-0.0456087	0.879028	-0.0273559	0.999179	-0.257805	0.000179918	-0.0970667	0.767991
ADCK5	NM_174922	1870.93	0.00239884	0.993078	0.0356739	0.91825	0.0387133	0.86778	0.00543823	1	-0.0314719	0.922363	0.1123	0.623827	0.129098	0.668468	-0.0146746	0.999179	-0.201029	0.0762739	-0.03351	0.966235
ADCY1	NM_001281768	3209.86	0.226463	0.536966	0.171768	0.724156	0.224581	0.48493	0.279276	0.720614	0.0549849	0.92482	0.124321	0.802192	0.212311	0.71855	0.142975	0.983954	-0.59127	0.00247223	-0.171183	0.864903
ADCY10	NM_001297772	5.55176	0.691102	NA	0.343187	NA	-1.09357	NA	-0.745652	NA	0.151411	NA	0.427663	NA	-0.169948	NA	-0.446199	NA	0.295139	0.80634	-0.539406	NA
ADCY10P1	NR_026938	88.6852	-0.00999515	0.989921	0.12644	0.893048	-0.22222	0.698768	-0.358655	0.867327	0.0141192	0.989168	-0.153761	0.845942	-0.0594302	0.976408	0.10845	0.999179	0.450546	0.165024	0.0242255	0.993296
ADCY2	NM_020546	1.92893	-1.52565	NA	0.240549	NA	1.60522	NA	-0.160959	NA	0.566004	NA	-3.0757	NA	-1.21297	NA	2.42869	NA	0.588619	0.753	2.09156	NA
ADCY3	NM_001320613	15999.1	-0.0234185	0.777291	-0.0622914	0.357686	-0.106983	0.0266094	-0.0681106	0.485207	-0.108779	0.0259603	-0.0470736	0.534546	-0.03402	0.795743	-0.0957258	0.115072	-0.086846	0.0282636	-0.0850562	0.664709
ADCY4	NM_001198592	31.1887	-0.40139	0.71152	-0.67752	NA	-0.130615	0.916613	0.145515	1	0.189359	0.888384	-0.638294	NA	-0.682135	NA	0.145517	0.999179	1.10017	0.0299932	0.591135	0.802978
ADCY5	NM_001199642	6.61584	0.694055	NA	-0.0564003	NA	-0.594483	NA	0.155969	NA	-0.512086	NA	-0.372299	NA	0.733944	NA	0.594158	NA	0.866099	0.52286	-1.20528	NA
ADCY6	NM_015270	56.1208	0.215941	0.736255	-0.583401	0.294261	-0.470469	0.321577	0.328873	0.950876	-0.222275	0.714076	0.0359535	NA	-0.115377	NA	-0.373605	0.689396	1.22862	1.24e-05	-0.437918	0.747874
ADCY6-DT	NR_110020	0.260451	-1.02451	NA	-0.986999	NA	0.971342	NA	0.933839	NA	-0.138396	NA	-0.176021	NA	0.158043	NA	0.195663	NA	-0.0322077	NA	0.886232	NA
ADCY7	NM_001286057	4839.05	-0.0233111	0.915034	0.071984	0.75295	-0.058064	0.733187	-0.153359	0.510808	-0.0256967	0.923315	0.122248	0.455166	-0.0138435	0.982688	-0.161788	0.427495	-0.257028	0.00373594	-0.00205036	0.998895
ADCY8	NM_001115	0.672721	-3.21859	NA	-3.18109	NA	0	NA	0	NA	-1.64282	NA	0.207029	NA	1.7221	NA	-0.127704	NA	-0.721477	NA	1.57555	NA
ADCY9	NM_001116	77.2619	-0.327904	0.537238	-0.775678	0.0555406	-0.532313	0.237819	-0.08454	1	-0.601053	0.0412938	-0.20487	0.680294	-0.0906508	0.938472	-0.486834	0.260516	1.76001	8.63e-14	-0.273002	0.825091
ADCYAP1	NM_001117	0.256331	0	NA	0	NA	2.47609	NA	2.43859	NA	0.823243	NA	0	NA	0.973984	NA	1.97323	NA	-0.0322348	NA	0.886225	NA
ADCYAP1R1	NM_001199635	0.167455	0	NA	0	NA	0.97132	NA	0.933819	NA	-2.00879	NA	-1.08463	NA	0	NA	-0.766087	NA	1.83854	NA	-1.94616	NA
ADD1	NM_001119	33687.1	-0.00798496	0.956408	0.17282	0.015738	0.136472	0.0687469	-0.0443331	1	-0.0685484	0.522034	0.107825	0.229832	0.12316	0.185225	-0.0532135	0.92356	0.536087	5.46e-24	-0.0602453	0.825769
ADD2	NM_001185054	4.45931	-1.23523	NA	-0.217845	NA	0.596251	NA	-0.421125	NA	-0.118513	NA	0.48092	NA	0.190136	NA	-0.409294	NA	0.156463	0.917487	1.11662	NA
ADD3	NM_016824	6268.73	-0.20566	0.152344	0.200378	0.155008	0.361151	0.000737127	-0.0448869	1	0.0130743	0.964334	0.154411	0.330976	0.0255276	0.964866	-0.115809	0.785616	0.240137	0.0119652	0.219024	0.653979
ADD3-AS1	NR_038943	15.3413	0.089746	NA	-0.0196441	NA	-0.335676	NA	-0.226286	1	-0.323755	NA	0.117848	NA	-0.0815191	NA	-0.523122	0.926745	0.731707	0.256487	-0.41278	0.898662
ADGB	NM_024694	0.428015	-0.388995	NA	-2.31699	NA	-0.99402	NA	0.933849	NA	-0.290937	NA	-1.02623	NA	-1.5014	NA	-0.76615	NA	-0.512785	NA	0.0984269	NA
ADGRA1	NM_001291085	0.0992633	0	NA	0	NA	0	NA	0	NA	0	NA	0	NA	2.2076	NA	2.24522	NA	-0.0324474	NA	-0.0751465	NA
ADGRA1-AS1	NR_111905	0.185194	-1.22857	NA	-1.17553	NA	-0.936571	NA	-0.989588	NA	0	NA	0	NA	0	NA	0	NA	-2.14383	NA	1.08963	NA
ADGRA2	NM_032777	24.2424	-0.557065	0.57836	-0.471941	NA	-0.469733	0.641739	-0.554857	0.945368	-0.588944	0.497132	-0.622896	NA	0.0545025	NA	0.0884549	0.999179	1.04246	0.0380243	-0.0316103	0.994862
ADGRA3	NM_145290	742.935	0.0337941	0.96775	0.169698	0.850192	0.274291	0.62355	0.138387	1	0.0717862	0.947108	0.405134	0.548803	0.165811	0.920237	-0.167536	0.999179	-4.02292	7.64e-40	0.0383386	0.988996
ADGRB1	NM_001702	43.6962	0.580406	0.33506	-0.123193	0.915863	-0.661271	0.191437	0.0423275	1	0.538763	0.352944	-0.368054	NA	-0.739941	NA	0.166876	0.999179	0.167996	0.701738	-0.0410829	0.988987
ADGRB2	NM_001364857	59.4768	-0.872425	0.210012	-0.386365	0.703886	0.267061	0.761503	-0.218998	1	-0.492663	0.454555	-0.372035	NA	-0.271501	NA	-0.39213	0.876364	1.88604	4.62e-07	0.379801	0.850213
ADGRB3	NM_001704	2.44048	-0.256006	NA	0.366539	NA	-0.714708	NA	-1.33725	NA	0.146675	NA	-1.50976	NA	-1.91167	NA	-0.255239	NA	0.337778	0.818873	0.403012	NA
ADGRD1	NM_198827	221.852	-0.251916	0.596381	-0.180691	0.785496	-0.126867	0.803848	-0.198092	1	-0.312086	0.427593	0.129625	0.818983	0.0760052	0.948061	-0.365705	0.534622	1.66524	3.71e-14	-0.0599069	0.970536
ADGRD1-AS1	NR_131950	17.3099	-1.68325	0.376521	-0.0203883	NA	2.55933	NA	0.896476	0.813966	-0.315538	0.707754	0.591528	NA	0.620406	NA	-0.28666	0.959138	3.15808	1.08e-07	1.36787	0.719138
ADGRE1	NM_001256255	234.678	0.0101975	0.989921	-0.0243	0.983553	-0.0312512	0.968104	0.0032464	1	0.156741	0.852813	0.194561	0.804243	-0.0178384	0.991775	-0.0556583	0.999179	-0.350041	0.313099	0.146853	0.938589
ADGRE2	NM_001271052	3528.88	-0.125914	0.0912826	0.0220714	0.888763	-0.0688042	0.402497	-0.216789	0.000228773	-0.0963735	0.202616	-0.0242766	0.862312	-0.0582498	0.687677	-0.130347	0.0869526	0.429803	1.67e-19	0.0298211	0.921345
ADGRE3	NM_001289159	1.24647	-1.76424	NA	-0.424216	NA	0.675065	NA	-0.664948	NA	-0.458012	NA	-4.03636	NA	-3.38266	NA	0	NA	0.349802	0.856199	1.30646	NA
ADGRE4P	NR_024075	71.3489	-0.107046	0.8363	0.00869104	0.991723	-0.241226	0.552213	-0.356963	0.652161	-0.108253	0.877642	-0.707909	0.0462983	-0.287675	0.706589	0.311981	0.82921	-0.636789	0.00882505	-0.00104491	0.999057
ADGRE5	NM_078481	21245.4	0.0647661	0.619963	0.12836	0.230398	0.0582402	0.626754	-0.00535363	1	0.120297	0.249109	0.135835	0.185826	0.140417	0.208248	0.124879	0.39671	0.374664	4.17e-09	0.0558597	0.872672
ADGRF1	NM_153840	0.367069	-1.02452	NA	2.1928	NA	0.971344	NA	-2.2457	NA	-0.13841	NA	-1.13782	NA	-0.803756	NA	0	NA	-0.0324332	NA	0.886566	NA
ADGRF2	NM_001368115	1.03859	-3.48412	NA	-0.36687	NA	0	NA	-3.10757	NA	3.04055	NA	1.75547	NA	-3.98267	NA	-2.69762	NA	-2.49169	0.440438	6.52477	NA
ADGRF3	NM_001321971	513.944	0.462274	0.0210836	0.156206	0.665578	-0.189345	0.446202	0.116723	1	0.314605	0.16322	0.212089	0.45412	-0.119746	0.834355	-0.0172294	0.999179	0.208435	0.22468	-0.147329	0.84868
ADGRF4	NM_153838	19.9852	-0.318443	0.883061	-0.185111	NA	0.306545	NA	0.173213	1	-0.713761	0.328653	-0.925591	NA	0.159967	NA	0.371796	0.963605	4.32089	9.44e-11	-0.395269	0.928991
ADGRF5	NM_015234	0.453488	2.87091	NA	0.936484	NA	-1.96218	NA	-0.0278744	NA	-2.57337	NA	-1.6492	NA	1.11975	NA	0.195643	NA	2.40256	NA	-5.44465	NA
ADGRG1	NM_001370429	166.353	0.0838686	0.874544	0.809668	0.00137728	0.291158	0.401718	-0.434642	0.289472	-0.269647	0.395053	0.277152	0.374853	0.335236	0.325047	-0.211562	0.809967	1.91597	4.02e-23	-0.353411	0.717846
ADGRG2	NM_001079858	119.273	-0.305107	0.458628	0.0953267	0.88795	0.222979	0.579118	-0.177454	1	-0.0734097	0.879809	0.0465111	0.931964	-0.157185	0.788998	-0.277105	0.563666	1.67425	3.87e-19	0.231973	0.812291
ADGRG3	NM_001308360	0.316168	-2.17248	NA	-2.13498	NA	1.89057	NA	1.85307	NA	1.84516	NA	0	NA	-0.863758	NA	1.15729	NA	-2.14108	NA	4.01649	NA
ADGRG4	NM_153834	0.333076	-1.02453	NA	-0.987018	NA	0	NA	0	NA	-0.138411	NA	1.29222	NA	1.10975	NA	-0.320788	NA	-0.0322345	NA	0.886304	NA
ADGRG5	NM_001304376	16881.9	-0.139611	0.422049	0.326812	0.00598715	0.374839	0.000756646	-0.0915849	0.966786	-0.113473	0.547547	0.272905	0.0360313	0.304685	0.0180866	-0.081693	0.959549	0.694545	4.67e-14	0.0264563	0.968493
ADGRG6	NM_198569	1.38974	-0.539572	NA	-0.781572	NA	0.376029	NA	0.618027	NA	1.29182	NA	2.72004	NA	-0.359515	NA	-1.78771	NA	-2.57248	0.238685	1.83163	NA
ADGRG7	NM_032787	5.482	-0.625162	NA	-1.35835	NA	-1.40619	NA	-0.673016	NA	0.357122	NA	0.768628	NA	-0.233939	NA	-0.645444	NA	1.44403	0.167672	0.981859	NA
ADGRL1	NM_001008701	89.0375	-0.494185	0.373	-0.606215	0.242643	-0.22661	0.715064	-0.11458	1	-0.279237	0.659987	-0.179283	0.812226	-0.288222	0.774379	-0.388176	0.758409	0.81373	0.00819687	0.215108	0.899153
ADGRL2	NM_001350699	15.9005	-0.0548869	NA	-0.222463	NA	0.126044	NA	0.29362	1	0.301839	NA	0.402657	NA	0.868828	NA	0.76801	0.865023	-3.38995	5.88e-07	0.357137	0.932116
ADGRL3	NM_001371342	1.20032	2.34651	NA	2.33096	NA	1.48514	NA	1.50069	NA	0.0907177	NA	0.162428	NA	-1.10773	NA	-1.17944	NA	2.82104	0.230471	-2.2551	NA
ADGRL3-AS1	NR_110595	0	NA	NA	NA	NA	NA	NA	NA	NA	NA	NA	NA	NA	NA	NA	NA	NA	NA	NA	NA	NA
ADGRL4	NM_022159	0.086016	-1.02442	NA	-0.986916	NA	0.971353	NA	0.933853	NA	0	NA	0	NA	0	NA	0	NA	-0.99391	NA	0.886086	NA
ADGRV1	NM_032119	14.7122	-0.136152	NA	-0.255317	NA	-0.0959021	NA	0.023263	1	-0.153309	NA	-0.750484	NA	-0.326638	NA	0.270537	0.999179	0.871608	0.114526	-0.0171309	0.997834
ADH1A	NM_000667	0.111198	0	NA	0	NA	0	NA	0	NA	0.823287	NA	1.64039	NA	-0.803687	NA	-1.62066	NA	-0.0321731	NA	0.886167	NA
ADH1B	NM_000668	0.0432402	-1.02441	NA	-0.986899	NA	0	NA	0	NA	0	NA	0	NA	0	NA	0	NA	-0.993962	NA	0.88619	NA
ADH1C	NR_133005	0.847048	-3.02931	NA	-2.99181	NA	0.971385	NA	0.933879	NA	1.76774	NA	0.422942	NA	-1.21331	NA	0.131455	NA	-1.15448	NA	4.79688	NA
ADH4	NM_000670	0.432979	1.95168	NA	2.70695	NA	-0.123972	NA	-0.879156	NA	2.06495	NA	0	NA	-2.04535	NA	0	NA	-0.0325448	NA	0.114664	NA
ADH5	NM_000671	9074.85	-0.0733389	0.534465	0.114398	0.271516	0.105231	0.259545	-0.0825054	0.790454	-0.000604156	0.998259	0.0670921	0.611287	0.0512731	0.825421	-0.0164232	0.999179	0.0509364	0.48584	0.0730633	0.807385
ADH6	NM_001102470	0.262128	-1.02451	NA	-0.986999	NA	0	NA	0	NA	0.880535	NA	-1.13781	NA	0.0944241	NA	2.11256	NA	-0.0322601	NA	1.90496	NA
ADH7	NM_001166504	0.17044	0	NA	0	NA	0	NA	0	NA	0.823265	NA	0.78564	NA	1.24595	NA	1.28356	NA	-0.0323086	NA	0.886407	NA
ADHFE1	NM_144650	80.6844	0.043248	0.953774	0.168026	0.836269	0.243198	0.63542	0.118419	1	0.0623505	0.946765	-0.293864	0.653072	-0.177745	0.892357	0.178469	0.994484	-0.268796	0.423806	0.0194104	0.994619
ADI1	NM_018269	4845.34	0.0371967	0.849968	-0.0526285	0.827928	-0.097431	0.497419	-0.00760587	1	0.0220573	0.93377	-0.0256504	0.924369	-0.0613513	0.858967	-0.0136437	0.999179	-0.0767588	0.440082	-0.0147805	0.980108
ADIG	NM_001018082	0	NA	NA	NA	NA	NA	NA	NA	NA	NA	NA	NA	NA	NA	NA	NA	NA	NA	NA	NA	NA
ADIPOQ	NM_004797	1.07456	-0.837663	NA	-2.0815	NA	1.8805	NA	3.1243	NA	0.293952	NA	-1.6857	NA	-2.74575	NA	-0.766155	NA	-0.57897	0.846746	1.13147	NA
ADIPOQ-AS1	NR_046662	0.0858843	0	NA	0	NA	0	NA	0	NA	-2.00875	NA	-2.04638	NA	0	NA	0	NA	1.83842	NA	-1.94596	NA
ADIPOR1	NM_015999	12130	0.0922793	0.489572	-0.117987	0.366826	-0.164794	0.0952051	0.0454717	1	-0.0620209	0.707145	-0.0924969	0.514616	0.0042726	0.991662	0.0347486	0.999179	0.161665	0.0322913	-0.153975	0.673243
ADIPOR2	NM_024551	14938	0.0988017	0.00763561	-0.0290485	0.68317	-0.0834451	0.0276763	0.0444051	0.691145	0.0153228	0.850479	0.00527299	0.960635	-0.0125537	0.931885	-0.00250388	0.999179	0.188851	3.23e-11	-0.0831773	0.586367
ADIRF	NM_006829	104.275	0.121377	0.889203	0.200502	0.850192	0.0564923	0.951188	-0.0226327	1	0.0765921	0.941253	-0.120448	0.904727	-0.143695	0.929296	0.0533449	0.999179	1.75958	2.22e-07	-0.044574	0.98745
ADK	NM_006721	7300	-0.0364072	0.828435	0.0531623	0.794173	0.101958	0.385684	0.0123884	1	0.0944184	0.493479	0.087058	0.565202	-0.0094719	0.984151	-0.00211149	0.999179	0.188853	0.0136296	0.131135	0.713338
ADM	NM_001124	147.286	-0.414679	0.747936	0.590405	0.6684	0.732143	0.458241	-0.272939	1	0.428307	0.745333	1.16438	0.169466	0.867296	0.477347	0.131227	0.999179	2.42193	1.92e-05	0.84343	0.759545
ADM2	NM_001369882	380.181	-0.263647	0.665192	-0.36049	0.578713	0.22984	0.682727	0.326683	0.921825	-0.391843	0.405547	-0.361189	0.474917	0.168473	0.884533	0.13782	0.999179	3.24303	2.71e-34	-0.12804	0.943808
ADM5	NM_001101340	444.434	0.223137	0.483222	-0.137518	0.770265	-0.485314	0.0293858	-0.124659	1	-0.0136999	0.98097	-0.0817302	0.864757	-0.186368	0.713057	-0.118337	0.989185	0.833772	5.58e-07	-0.236502	0.7705
ADNP	NM_181442	17061.6	-0.118047	0.0501715	-0.0957599	0.142454	-0.0787401	0.21882	-0.101027	0.18478	-0.128865	0.0200247	-0.0825586	0.243411	-0.0858985	0.276079	-0.132205	0.0283177	-0.182699	2.02e-05	-0.0105328	0.971992
ADNP2	NM_014913	5334.41	-0.0453057	0.819655	-0.151739	0.323408	-0.141736	0.291905	-0.0353031	1	-0.173119	0.196624	-0.20002	0.127205	-0.0341426	0.939116	-0.00724198	0.999179	0.119015	0.225233	-0.127528	0.761988
ADNP-AS1	NR_110007	105.1	-0.143835	0.735707	0.237421	0.56988	0.214481	0.530531	-0.166774	0.994774	-0.00224103	0.998074	0.166952	0.715807	-0.0436678	0.972199	-0.21286	0.869873	-0.0344405	0.8958	0.14193	0.899136
ADO	NM_032804	7800.32	-0.187848	0.280371	0.0603377	0.837472	0.20136	0.173637	-0.0468257	1	-0.16648	0.335984	0.125674	0.542839	0.143199	0.573099	-0.148955	0.664184	0.480935	1.66e-06	0.0216161	0.975948
ADORA1	NM_001048230	0.529541	0.921136	NA	0	NA	-0.974303	NA	0	NA	-0.592887	NA	-1.49769	NA	-1.62242	NA	-0.717648	NA	3.16484	NA	-1.51349	NA
ADORA2A	NR_103544	4736.59	-0.489302	5.93e-05	-0.11283	0.658321	-0.0131178	0.963283	-0.389589	0.00465044	-0.457414	0.000146124	-0.0618882	0.827587	0.118463	0.71855	-0.277062	0.102114	1.63169	4.47e-58	0.0322195	0.966235
ADORA2A-AS1	NR_028484	21.9519	-1.0849	0.259056	0.0325523	NA	0.24697	NA	-0.870485	0.643078	-0.651167	0.429655	-0.384374	NA	0.0505102	NA	-0.216283	0.999179	1.46294	0.00310218	0.433765	0.875902
ADORA2B	NM_000676	69.4588	-0.00690841	0.99355	0.562884	0.30598	-0.018289	0.983105	-0.588082	0.452752	-0.474474	0.273723	0.112082	0.883372	0.00526825	0.998533	-0.581287	0.249492	1.9481	1.58e-11	-0.467339	0.747769
ADORA3	NM_001302679	15.8919	-0.346769	NA	0.0123084	NA	0.144952	NA	-0.214125	1	0.211862	NA	0.983704	NA	-0.0811208	NA	-0.852962	0.594463	-0.439562	0.509801	0.558926	0.842527
ADPGK	NM_001365225	8557.61	0.181444	0.0418507	-0.0257963	0.902471	-0.110639	0.257628	0.0966016	0.697821	0.104245	0.344584	0.0102047	0.966882	-0.00120227	0.998806	0.0928376	0.679489	0.219141	0.000795384	-0.0768737	0.807189
ADPGK-AS1	NR_040107	195.41	0.102258	0.742502	-0.18302	0.567154	-0.31343	0.133702	-0.0281528	1	0.233728	0.27975	-0.0687069	0.856141	-0.184643	0.577653	0.117793	0.951073	0.528653	0.000186655	0.131765	0.852969
ADPRH	NM_001125	5026.5	-0.119349	0.23108	-0.0395301	0.817502	0.00519551	0.97326	-0.0746236	0.849123	-0.0150941	0.936148	-0.119719	0.21903	-0.129473	0.214972	-0.024848	0.999179	-0.283674	1.88e-06	0.104554	0.719138
ADPRHL1	NM_199162	71.1027	0.0183634	0.980865	-0.0353331	0.967909	-0.217694	0.65368	-0.163997	1	-0.102558	0.904882	-0.600241	0.185826	-0.241687	0.819415	0.255996	0.954498	-0.712688	0.0110143	-0.12059	0.945305
ADPRHL2	NM_017825	5943.05	0.206397	0.0012477	-0.014059	0.937682	-0.0590698	0.523726	0.161387	0.034021	0.164584	0.0150215	-0.037291	0.787132	-0.0408074	0.844952	0.161068	0.0325244	0.242217	5.46e-06	-0.0414774	0.890334
ADPRM	NM_020233	699.553	-0.117305	0.553423	-0.0224686	0.946107	0.14005	0.390481	0.0452135	1	0.104495	0.613689	-0.114438	0.583912	-0.127891	0.637698	0.0910425	0.941168	0.188701	0.0835602	0.222037	0.673243
ADRA1A	NM_001322502	0.744208	-1.4582	NA	-2.40021	NA	0.905517	NA	1.8475	NA	-0.438761	NA	-2.39417	NA	-0.921383	NA	1.03397	NA	0.772506	NA	1.01997	NA
ADRA1B	NM_000679	4.68751	0.899613	NA	0.558509	NA	-1.00969	NA	-0.668587	NA	-0.746612	NA	0.548374	NA	1.60986	NA	0.314878	NA	2.13778	0.059899	-1.64603	NA
ADRA1D	NM_000678	20.5352	0.229101	0.886366	0.630516	NA	0.216993	NA	-0.184422	1	-0.530309	0.706938	-0.490285	NA	0.627594	NA	0.58757	0.922036	1.40671	0.0383662	-0.75927	0.807385
ADRA2A	NM_000681	2.66378	1.26033	NA	1.09348	NA	-0.223422	NA	-0.0565722	NA	0.273573	NA	-1.1994	NA	-3.74566	NA	-2.2727	NA	1.59471	0.311305	-0.987045	NA
ADRA2B	NM_000682	10.156	-0.813027	NA	-0.726847	NA	-0.471096	NA	-0.557275	1	-0.905305	NA	-0.805562	NA	-0.543939	NA	-0.643681	0.94972	0.882058	0.255949	-0.0921759	NA
ADRA2C	NM_000683	2.39385	0.00351268	NA	-1.12354	NA	-1.34128	NA	-0.214226	NA	-1.2381	NA	-1.62835	NA	-1.22996	NA	-0.839715	NA	-0.171638	0.912158	-1.24134	NA
ADRB1	NM_000684	527.633	-0.255091	0.173782	0.730104	2.64e-09	0.662108	1.53e-07	-0.323087	0.0545408	-0.327504	0.164804	0.734154	5.22e-06	0.948121	3.9e-09	-0.113538	0.965116	-2.44824	1.57e-80	-0.0720695	0.933595
ADRB2	NM_000024	56.1033	-0.75091	0.382641	0.218262	0.867105	0.360295	0.704018	-0.608876	0.789975	-0.511359	0.381094	0.0952156	NA	0.26031	NA	-0.346264	0.888079	2.80008	1.35e-13	0.239623	0.924678
ADRB3	NM_000025	0.658004	-0.977173	NA	0.447611	NA	-0.941942	NA	-2.36669	NA	-3.31194	NA	-1.51835	NA	2.67818	NA	0.884642	NA	1.27543	NA	-2.33479	NA
ADRM1	NM_007002	21099.5	0.0932248	0.556336	-0.0438104	0.856435	-0.126696	0.318205	0.0103397	1	-0.0735837	0.689547	-0.075923	0.685175	-0.0100549	0.984307	-0.0077156	0.999179	-0.149017	0.0910298	-0.166478	0.68087
ADSL	NR_134256	17986.9	0.0902601	0.569822	0.0689275	0.746897	-0.054742	0.731982	-0.0334094	1	0.00903045	0.972478	0.0894682	0.608159	0.0552847	0.874886	-0.025153	0.999179	-0.256226	0.00199104	-0.080857	0.844796
ADSS1	NM_152328	14.8762	-0.749059	NA	-0.585614	NA	0.0348122	NA	-0.128633	1	0.0749473	NA	-0.0895645	NA	0.608754	NA	0.773266	0.557113	-0.00814145	0.991528	0.824077	0.738482
ADSS2	NM_001126	8288.22	-0.218411	0.239991	0.0273769	0.940318	0.205705	0.213064	-0.0400835	1	-0.0405863	0.9057	0.0248954	0.950308	-0.0349355	0.958284	-0.100417	0.945504	-0.364844	0.00127935	0.178075	0.740235
ADTRP	NM_032744	428.556	-0.00656946	0.990665	0.158527	0.785963	0.196393	0.610186	0.0312964	1	-0.111412	0.852537	0.0287269	0.972654	0.123288	0.903057	-0.0168512	0.999179	-0.410515	0.0738567	-0.10447	0.938122
AEBP1	NM_001129	25.5482	-0.662365	0.476604	-0.985098	NA	0.05024	0.970654	0.372973	1	-0.379178	0.714641	-0.773553	NA	-0.222188	NA	0.172186	0.999179	1.06941	0.0281239	0.283481	0.921345
AEBP2	NM_153207	6467.32	-0.171116	0.30256	-0.182311	0.256487	-0.0691883	0.708072	-0.0579937	1	0.0191407	0.951447	-0.137653	0.445178	-0.15283	0.479658	0.00396385	0.999179	-0.0595031	0.612991	0.190503	0.692237
AEN	NM_022767	12867.4	0.0732374	0.568895	-0.200112	0.0201288	-0.137568	0.143583	0.135782	0.328269	-0.0549043	0.720201	-0.0673264	0.641595	0.0629229	0.778153	0.0753449	0.84347	0.753743	1.28e-33	-0.127856	0.695068
AFAP1	NM_198595	235.153	-0.0840758	0.886649	0.363088	0.434417	0.557495	0.0929679	0.110331	1	-0.0229533	0.97589	0.445344	0.23377	0.398875	0.396149	-0.0694219	0.999179	0.951819	6.23e-05	0.061357	0.970942
AFAP1-AS1	NR_026892	68.2241	-0.0560885	0.966461	0.166407	0.913227	0.456153	0.568225	0.233657	1	-0.0252208	0.982067	0.184517	0.829865	0.171024	0.91538	-0.0387144	0.999179	3.18729	2e-16	0.0312834	0.99346
AFAP1L1	NM_001323063	3.32735	0.325977	NA	-0.474882	NA	-0.467334	NA	0.333522	NA	-0.485347	NA	0.0514041	NA	-1.06344	NA	-1.60019	NA	0.240257	0.86496	-0.810947	NA
AFAP1L2	NM_001001936	1233.38	-0.424594	0.167592	0.127435	0.818646	0.209114	0.538961	-0.342915	0.516873	-0.156451	0.734044	0.0514701	0.935028	0.0680622	0.947606	-0.139859	0.988021	0.247417	0.260975	0.268419	0.774496
AFDN	NM_001366321	7356.74	0.0331386	0.766459	0.0199239	0.90474	0.0216106	0.845114	0.0348253	1	0.140655	0.0438549	0.0099177	0.959219	-0.0459027	0.80689	0.0848344	0.568979	-0.916948	2.19e-79	0.107826	0.675181
AFDN-DT	NR_027906	7.15941	-0.163119	NA	0.443954	NA	0.893552	NA	0.28648	NA	0.277734	NA	1.12578	NA	-0.260954	NA	-1.109	NA	-0.209544	0.830472	0.441235	NA
AFF1	NM_001166693	20399.1	0.218454	0.00016269	0.197225	0.00114814	0.112294	0.11529	0.133522	0.0963866	0.37966	1.14e-13	0.18642	0.00294749	-0.0310279	0.892975	0.162213	0.018074	0.433234	8.79e-19	0.161522	0.518966
AFF1-AS1	NR_038841	602.309	0.0828472	0.74097	0.271682	0.112841	0.165822	0.362779	-0.0230129	1	0.245464	0.115864	0.143893	0.497479	-0.0593484	0.909402	0.0422223	0.999179	0.794488	4.62e-13	0.162944	0.764149
AFF2	NM_002025	12.608	0.376386	NA	0.0980075	NA	-0.346294	NA	-0.0679155	1	-0.174914	NA	-0.344853	NA	-0.147387	NA	0.0225511	0.999179	1.56749	0.0410348	-0.550934	0.890334
AFF3	NM_002285	7493.93	-0.0208107	0.939873	0.0416476	0.902471	-0.0132626	0.960689	-0.0757208	1	0.084747	0.738599	0.126842	0.561869	-0.0563216	0.91556	-0.0984171	0.933641	-2.07017	2.19e-97	0.105914	0.841491
AFF4	NM_014423	7391.36	0.0330397	0.875911	-0.0442847	0.867105	-0.0315857	0.873327	0.0457386	1	0.204943	0.102209	0.0532065	0.818143	-0.0641155	0.857959	0.0876215	0.911421	0.194867	0.0375226	0.172162	0.695068
AFG1L	NM_145315	571.348	0.0769147	0.728596	0.0766864	0.789001	-0.0827308	0.670432	-0.0825025	1	0.158005	0.359196	0.0973578	0.665859	-0.0277016	0.964599	0.0329454	0.999179	0.352879	0.000675221	0.0814263	0.884674
AFG3L1P	NR_003226	3794.85	0.0515404	0.733605	-0.0953197	0.511703	-0.105224	0.344084	0.0416357	1	0.131178	0.255977	0.107464	0.412544	-0.0339904	0.923981	-0.0102759	0.999179	-0.578115	3.23e-17	0.0799766	0.819336
AFG3L2	NM_006796	15777.9	-0.00663236	0.94768	-0.0621484	0.392266	-0.0915392	0.0878208	-0.0360231	0.977148	-0.108145	0.0378113	-0.0414814	0.629724	-0.0201406	0.917876	-0.0868047	0.2413	-0.237782	4.38e-10	-0.101201	0.626574
AFM	NM_001133	0.45171	0.926052	NA	0	NA	1.2993	NA	2.25061	NA	2.91414	NA	0.78565	NA	-1.13981	NA	0.988511	NA	-0.0322175	NA	1.98877	NA
AFMID	NM_001145526	2742.98	0.00192556	0.992058	-0.0874174	0.570295	-0.0510467	0.710452	0.0382963	1	-0.173123	0.0884545	-0.117409	0.357173	-0.0321707	0.929095	-0.087884	0.80902	-0.278658	0.00010787	-0.174755	0.650725
AFP	NM_001134	0.985256	-2.70419	NA	-2.66669	NA	3.10203	NA	3.06452	NA	0.242473	NA	-0.782542	NA	0.925549	NA	1.95054	NA	-0.236541	NA	2.94618	NA
AFTPH	NM_017657	10749.5	-0.205469	0.040166	0.088761	0.569778	0.15876	0.120822	-0.135469	0.451249	-0.105247	0.420155	0.0279618	0.898297	-0.0143941	0.977524	-0.147603	0.331906	0.186066	0.0140768	0.100497	0.774496
AGA	NM_000027	2305.17	-0.081917	0.494621	-0.016966	0.935585	0.0680159	0.54324	0.00306491	1	0.0489625	0.751394	-0.0236241	0.904727	-0.000192317	0.999742	0.0723943	0.85086	-0.114003	0.102626	0.131156	0.68087
AGAP1	NM_001244888	41.8602	0.394318	0.427784	0.0931101	0.919433	-0.253907	0.604569	0.0473008	1	-0.234454	0.831731	0.238049	NA	-0.344943	NA	-0.817445	0.39296	-2.12495	3.79e-10	-0.628381	0.710989
AGAP10P	NR_160521	55.8902	0.167353	0.778888	-0.077484	0.932012	-0.208471	0.681899	0.0363658	1	0.152007	0.839002	-0.0351945	NA	0.0282969	NA	0.215498	0.976743	-0.216916	0.511845	-0.0149843	0.995784
AGAP11	NM_133447	50.7241	0.181988	0.81698	-0.0955057	0.934972	-0.13674	0.85555	0.140753	1	0.0576132	0.954016	-0.0496256	NA	-0.236561	NA	-0.129322	0.999179	1.24671	0.000151493	-0.123927	0.955983
AGAP12P	NR_029396	15.0716	0.097762	NA	-0.508201	NA	-0.2347	NA	0.371262	1	-0.0551675	NA	0.757981	NA	0.439876	NA	-0.373272	0.989185	-0.4156	0.532157	-0.15245	0.968493
AGAP1-IT1	NR_131900	0.200588	-0.853075	NA	0.194926	NA	-0.936579	NA	-1.9844	NA	0	NA	0	NA	0	NA	0	NA	-1.76944	NA	0.715323	NA
AGAP2	NM_014770	8273.02	-0.144815	0.132677	-0.169491	0.0508544	-0.178771	0.0278503	-0.154096	0.148127	-0.170742	0.041799	-0.109128	0.312099	-0.0936684	0.536092	-0.155282	0.139611	-0.0177439	0.828078	-0.0255953	0.950861
AGAP2-AS1	NR_027032	32.9532	0.197884	0.819132	0.133334	0.914973	0.00865834	0.992971	0.0732084	1	-0.315423	0.723308	-0.283531	NA	-0.0518925	NA	-0.0837848	0.999179	0.186742	0.694477	-0.51292	0.779142
AGAP3	NM_031946	5671.2	-0.0929107	0.43715	-0.271769	0.000377276	-0.284819	0.000142523	-0.105961	0.621728	-0.333623	3.57e-06	-0.202138	0.0218209	-0.0940041	0.575482	-0.225489	0.0101917	-0.551203	2.4e-18	-0.240412	0.343397
AGAP4	NM_001276343	691.563	0.253579	0.469493	-0.0572002	0.927932	-0.247982	0.4234	0.0627974	1	0.14965	0.74283	0.175333	0.687786	0.0607891	0.9557	0.0351058	0.999179	0.0753294	0.756743	-0.103515	0.931034
AGAP5	NM_001144000	1059.22	0.115038	0.660152	0.0309285	0.941265	-0.0933259	0.703035	-0.00921614	1	0.249046	0.204488	0.115855	0.694695	-0.00265972	0.998004	0.130531	0.894645	0.139793	0.343247	0.134348	0.829468
AGAP6	NM_001077665	3591.31	0.176223	0.443144	-0.042001	0.919433	-0.114568	0.617908	0.103656	1	0.152436	0.538055	0.0304233	0.943612	-0.0489586	0.94011	0.0730542	0.996976	-0.156961	0.274863	-0.0234429	0.978461
AGAP7P	NR_126580	321.422	0.222685	0.47324	-0.0804799	0.876906	-0.179587	0.53842	0.123578	1	0.34792	0.184933	0.211043	0.547218	-0.167719	0.770976	-0.0308425	0.999179	-0.494235	0.00510936	0.12557	0.895668
AGAP9	NM_001190810	838.731	0.0789169	0.785384	-0.0873943	0.816239	-0.0577238	0.838606	0.108587	1	0.438143	0.00634978	0.226288	0.317516	-0.121078	0.785519	0.0907779	0.989185	-0.117064	0.452312	0.359608	0.606157
AGBL1	NM_152336	0.306281	0	NA	0	NA	1.79788	NA	1.76038	NA	-1.10017	NA	1.99907	NA	0	NA	-2.94088	NA	0.929607	NA	-1.03742	NA
AGBL1-AS1	NR_046012	0	NA	NA	NA	NA	NA	NA	NA	NA	NA	NA	NA	NA	NA	NA	NA	NA	NA	NA	NA	NA
AGBL2	NM_024783	315.593	0.0598809	0.885121	0.0682478	0.903424	0.00781601	0.987019	-0.000550937	1	0.230902	0.440474	-0.0226101	0.972473	-0.171983	0.743117	0.0815293	0.999179	0.647041	0.000135032	0.171272	0.838615
AGBL3	NM_001367817	388.998	0.109286	0.59545	0.143336	0.496724	-0.00428446	0.988267	-0.0383344	1	0.0335602	0.910204	0.057673	0.818675	0.0641417	0.875359	0.0400289	0.999179	0.524363	1.49e-07	-0.0754401	0.89445
AGBL4	NR_136623	6.65198	-2.16464	NA	-2.03627	NA	0.103999	NA	-0.0243744	NA	-0.624401	NA	-0.0179065	NA	0.214229	NA	-0.392265	NA	2.37287	0.00515444	1.54037	NA
AGBL4-IT1	NR_046839	0	NA	NA	NA	NA	NA	NA	NA	NA	NA	NA	NA	NA	NA	NA	NA	NA	NA	NA	NA	NA
AGBL5	NM_001035507	3633.18	0.0412525	0.782092	0.0892213	0.525069	-0.0091174	0.959412	-0.0570863	1	-0.108525	0.358723	0.0193727	0.929637	0.103158	0.520925	-0.0247399	0.999179	-0.193705	0.00554396	-0.149451	0.673243
AGBL5-AS1	NR_046730	1.7598	0.11807	NA	-0.224569	NA	-0.649327	NA	-0.30669	NA	-0.147475	NA	2.50632	NA	1.46179	NA	-1.19198	NA	-1.52309	0.417457	-0.264973	NA
AGER	NM_001206929	731.539	0.195057	0.526013	-0.194632	0.58055	-0.488403	0.0168245	-0.0987137	1	0.146411	0.682981	-0.20246	0.532699	-0.245404	0.513276	0.103467	0.99388	0.185766	0.314684	-0.0483037	0.966235
AGFG1	NM_004504	16377.3	-0.0716568	0.525422	0.0696997	0.59153	0.0874662	0.346665	-0.0538903	0.981391	0.0101932	0.958496	0.0125915	0.953714	-0.0643816	0.727155	-0.0667799	0.852133	-0.0383002	0.593316	0.0821254	0.772051
AGFG2	NM_006076	8872.79	-0.0479047	0.791345	0.104977	0.543886	0.0209004	0.915741	-0.131981	0.623384	-0.140881	0.298141	0.055295	0.790597	0.0510352	0.890977	-0.14514	0.480596	0.689159	1.8e-18	-0.0926441	0.818202
AGGF1	NM_018046	6156.67	-0.162917	0.177372	-0.0273513	0.913227	0.10754	0.372638	-0.0280264	1	-0.0273919	0.906054	0.0203868	0.934819	-0.0185127	0.967842	-0.0662914	0.952532	-0.0506196	0.582972	0.135786	0.713338
AGK	NM_001364948	2934.51	0.1133	0.421248	0.0496168	0.823537	-0.0644655	0.65368	-0.000782221	1	0.0984312	0.5037	0.114145	0.423009	0.0358259	0.925377	0.0201116	0.999179	-0.0262619	0.792958	-0.0145068	0.978062
AGL	NM_000642	6739.09	-0.085937	0.725259	-0.0634088	0.850821	0.0398693	0.877339	0.0173411	1	0.174063	0.389852	0.0506318	0.882068	-0.0882635	0.842476	0.0351679	0.999179	-0.0256402	0.86496	0.260284	0.664467
AGMAT	NM_024758	1063.29	0.00124595	0.99662	0.0519032	0.877939	-0.0185119	0.947971	-0.0691692	1	0.0778249	0.781598	0.0875382	0.752532	-0.113201	0.760899	-0.122915	0.871652	-0.585718	8.87e-08	0.076931	0.903459
AGMO	NM_001004320	0.074806	0	NA	0	NA	0.971353	NA	0.933853	NA	0	NA	0.785677	NA	0	NA	-0.766053	NA	-0.0322521	NA	-0.0755025	NA
AGO1	NM_001317122	8201.15	-0.0066199	0.9697	0.0266942	0.894863	-0.0304215	0.822453	-0.0637356	0.950876	-0.00500561	0.981943	0.124956	0.21903	0.0113196	0.98007	-0.118642	0.418359	0.139179	0.0376303	0.00193624	0.997883
AGO2	NM_012154	10619.9	-0.0838146	0.614302	-0.0279754	0.919433	-0.0295978	0.875587	-0.085437	0.944527	-0.150462	0.27294	-0.166842	0.218455	-0.0810987	0.778116	-0.0647182	0.980326	-0.591749	3.08e-13	-0.066362	0.886532
AGO3	NM_024852	3185.71	-0.08881	0.506328	-0.0758317	0.642455	-0.0363515	0.806025	-0.0493298	1	0.0637945	0.689558	-0.00832792	0.976113	-0.136809	0.302508	-0.0646866	0.941168	-0.102247	0.197231	0.152895	0.673243
AGO4	NR_146062	1341.87	-0.11529	0.543679	0.0237964	0.940778	0.0453158	0.829982	-0.0937705	0.967751	-0.0436735	0.878861	-0.0221839	0.950347	-0.0488343	0.921979	-0.0703239	0.989185	-0.396145	6.33e-05	0.0718946	0.898816
AGPAT1	NM_006411	8857.19	0.053799	0.618816	0.00711858	0.969094	-0.0801967	0.346665	-0.0335163	1	-0.0628985	0.556067	0.00239543	0.990048	0.0442705	0.82814	-0.0210234	0.999179	0.362568	3.78e-12	-0.116385	0.673243
AGPAT2	NM_006412	2010.59	-0.161169	0.267848	-0.24007	0.0392948	-0.179773	0.144158	-0.100873	0.884634	-0.304497	0.00434163	-0.232053	0.0622917	-0.0233391	0.966474	-0.0957838	0.876364	-0.740518	5.62e-19	-0.143041	0.736151
AGPAT3	NM_020132	32878.3	0.161211	0.0228768	0.00903978	0.959075	-0.0534619	0.573634	0.0987097	0.460649	0.0238771	0.875427	0.00994221	0.959294	-0.0057858	0.986217	0.00814909	0.999179	0.311389	1.61e-09	-0.13703	0.626426
AGPAT4	NM_020133	688.341	0.128692	0.653882	0.478924	0.00596555	0.390149	0.0302685	0.0399167	1	0.288432	0.187492	0.351251	0.0916833	0.321115	0.168614	0.258296	0.444768	-0.47562	0.00104602	0.160106	0.818946
AGPAT4-IT1	NR_024277	81.1779	-0.109298	0.862996	0.301645	0.609725	0.392218	0.347419	-0.0187254	1	0.376235	0.485042	0.324899	0.592984	0.593177	0.202327	0.644513	0.17786	-0.925415	0.00126916	0.485974	0.719138
AGPAT5	NM_018361	15907.1	-0.214441	0.210494	-0.0814873	0.776466	0.0980568	0.607487	-0.0348968	1	-0.0659943	0.810287	-0.122636	0.573676	-0.153289	0.551426	-0.0966476	0.937446	-0.0458218	0.730044	0.148685	0.768604
AGPS	NM_003659	8710.99	-0.116016	0.490995	0.0314875	0.914973	0.11614	0.432216	-0.0313636	1	0.0413703	0.871447	0.104332	0.579649	-0.0404655	0.928726	-0.103427	0.846238	-0.339427	0.000179171	0.157659	0.719138
AGR2	NM_006408	0	NA	NA	NA	NA	NA	NA	NA	NA	NA	NA	NA	NA	NA	NA	NA	NA	NA	NA	NA	NA
AGR3	NM_176813	0.0717991	-0.0781713	NA	-0.986916	NA	-0.936541	NA	0	NA	0	NA	0	NA	0	NA	0	NA	-0.994064	NA	-0.060072	NA
AGRN	NM_198576	9492.35	-0.0806624	0.758664	-0.296125	0.0912977	-0.24907	0.152427	-0.0336075	1	-0.18921	0.365622	-0.109112	0.697705	0.0164686	0.983772	-0.063629	0.999179	1.3862	1.37e-33	-0.108251	0.864903
AGRP	NM_001138	2.89245	0.98959	NA	0.283817	NA	0.172348	NA	0.878117	NA	2.12739	NA	1.15343	NA	-1.33418	NA	-0.360233	NA	-0.303357	0.8591	1.13864	NA
AGT	NM_000029	0.137386	1.4288	NA	0	NA	-1.48188	NA	0	NA	-1.10013	NA	-0.175973	NA	0	NA	-0.76608	NA	0.929192	NA	-2.52866	NA
AGTPBP1	NM_001330701	4863.07	-0.156811	0.412101	-0.0297896	0.932092	0.116763	0.521354	-0.0102584	1	0.0197404	0.954798	-0.00547938	0.988649	-0.0188717	0.98007	0.00634812	0.999179	0.317242	0.0033585	0.176775	0.731714
AGTR1	NM_031850	0.385271	-1.31811	NA	-2.22711	NA	-0.936885	NA	0	NA	-3.00902	NA	-1.18871	NA	0	NA	-1.6622	NA	0.636991	NA	-1.69138	NA
AGTR2	NM_000686	0.31182	0	NA	0.936435	NA	2.34951	NA	1.35035	NA	0	NA	2.71302	NA	0	NA	-2.69327	NA	-0.0321708	NA	-0.0756485	NA
AGTRAP	NM_020350	706.983	-0.0710997	0.758535	-0.0256165	0.941703	-0.0451357	0.845787	-0.090619	1	-0.04858	0.877642	-0.0325891	0.925576	0.0127495	0.985177	-0.00324144	0.999179	-0.498782	3.02e-06	0.0228892	0.975948
AGXT	NM_000030	0	NA	NA	NA	NA	NA	NA	NA	NA	NA	NA	NA	NA	NA	NA	NA	NA	NA	NA	NA	NA
AGXT2	NM_001306173	0.301843	0	NA	0.936418	NA	0	NA	-0.989618	NA	-3.0349	NA	-1.21417	NA	0	NA	-1.66255	NA	2.86423	NA	-2.97171	NA
AHCTF1	NM_001323342	10826.5	-0.0432656	0.755117	-0.199174	0.0168405	-0.117991	0.217569	0.0379168	1	0.0556232	0.709163	-0.0102171	0.966882	-0.147502	0.166007	-0.0816612	0.785596	-0.270038	2.47e-05	0.099171	0.752726
AHCTF1P1	NR_077058	1097.83	-0.0839224	0.733453	-0.157022	0.502535	0.0463372	0.853536	0.119436	0.937741	0.0536977	0.868757	-0.00558378	0.989087	-0.117465	0.752301	-0.0581835	0.999179	-0.018126	0.906307	0.137903	0.805451
AHCY	NM_000687	38373.2	0.0168947	0.906393	0.0341423	0.841387	0.00259378	0.987434	-0.0146539	1	-0.0185798	0.917425	0.039728	0.79037	0.0567221	0.776091	-0.00158565	0.999184	-0.447598	1.72e-15	-0.0351428	0.921308
AHCYL1	NM_006621	15793.9	0.0586568	0.371085	0.0359098	0.686924	-0.0086799	0.922059	0.0140671	1	0.0977898	0.048139	0.0156312	0.884621	-0.0238505	0.88362	0.0583081	0.598788	0.0371599	0.386761	0.0394152	0.827132
AHCYL2	NM_001130723	2078.65	-0.0089703	0.960918	-0.153491	0.133697	-0.0752437	0.517218	0.0692767	0.945235	0.177095	0.0484902	-0.0655003	0.666022	-0.0734534	0.719718	0.169142	0.120579	0.0623824	0.43091	0.186341	0.60385
AHDC1	NM_001029882	3046.18	-0.14811	0.271536	-0.0314797	0.902888	-0.120116	0.335616	-0.236747	0.0353818	-0.404484	2.27e-06	0.0226807	0.928516	0.10169	0.643517	-0.325474	0.000550993	0.0898483	0.321537	-0.256047	0.50158
AHI1	NM_001134832	1079.12	-0.213056	0.362933	-0.0312322	0.943108	0.186344	0.377579	0.00452022	1	0.1051	0.734378	0.148635	0.585889	0.00807318	0.990813	-0.0354611	0.999179	0.317003	0.0213825	0.318412	0.650725
AHNAK	NM_001620	21763.8	-0.233614	0.489931	0.666544	0.00235225	0.804954	8.81e-05	-0.0952043	1	0.0925097	0.854804	0.433895	0.105769	0.374754	0.242448	0.0333685	0.999179	-0.561306	0.00247939	0.326425	0.711476
AHNAK2	NM_138420	6.51683	0.402302	NA	-0.804199	NA	0.166435	NA	1.37293	NA	-0.229063	NA	-1.75236	NA	-0.341444	NA	1.18185	NA	0.952277	0.336951	-0.630941	NA
AHR	NM_001621	17778	1.40496	2.31e-49	0.326144	0.00970544	-0.00750299	0.977814	1.07131	1.32e-28	0.684406	1.37e-11	0.116391	0.572208	-0.154018	0.50279	0.413997	0.000414033	0.960864	4.79e-24	-0.720248	3.05e-05
AHRR	NM_001242412	12173	0.0779316	0.653043	-0.0434781	0.863624	-0.0828001	0.5862	0.0386096	1	-0.0930291	0.594838	-0.018956	0.950624	0.0123725	0.983361	-0.0617007	0.988021	-0.299347	0.000475537	-0.17065	0.685893
AHSA1	NM_012111	22391	0.0621099	0.689511	-0.0773346	0.658321	-0.0916381	0.460134	0.0478064	1	0.0152348	0.949677	-0.0216986	0.927658	-0.026084	0.947668	0.0108494	0.999179	-0.324874	1.06e-05	-0.0465363	0.918052
AHSA2P	NR_152213	4802.71	0.123491	0.710435	0.0706493	0.884765	-0.123501	0.674243	-0.0706585	1	0.192283	0.52581	0.0560629	0.908438	-0.0447341	0.963749	0.0914861	0.996707	0.06446	0.746339	0.0691024	0.945544
AHSG	NM_001622	1.06036	-1.39701	NA	-0.995164	NA	-1.17125	NA	-1.57309	NA	-0.666709	NA	-3.05062	NA	1.21506	NA	3.59892	NA	-0.634574	0.774054	0.729978	NA
AHSP	NM_001318222	0.306356	0	NA	0	NA	0	NA	0	NA	3.04328	NA	1.64088	NA	-2.0617	NA	-0.659481	NA	-0.0320918	NA	3.10606	NA
AICDA	NM_020661	8747.16	-0.371141	0.357628	0.556689	0.092361	0.695838	0.0155298	-0.231991	0.945919	-0.210745	0.679386	0.299084	0.505167	0.33948	0.536092	-0.170348	0.983954	0.764061	0.00096705	0.160692	0.900501
AIDA	NM_022831	3353.21	-0.107743	0.733421	0.189712	0.53944	0.377101	0.0551529	0.0796455	1	0.123487	0.718856	0.0193521	0.973222	0.146701	0.763628	0.250836	0.519805	0.655495	7.22e-06	0.231376	0.745765
AIF1	NM_032955	1378.5	-0.0413918	0.874366	0.0155556	0.966043	0.136217	0.449816	0.0792697	1	-0.0388046	0.895744	0.0438954	0.880765	0.0637775	0.88362	-0.0189225	0.999179	1.96672	1.62e-89	0.00291408	0.998225
AIF1L	NR_033701	24.3009	-0.153119	0.880046	-0.379319	NA	0.245539	0.772008	0.471739	0.920833	-0.2199	0.831136	-0.0140586	NA	0.00086493	NA	-0.204976	0.999179	0.661168	0.134803	-0.0663651	0.982867
AIFM1	NM_004208	15041.7	0.0640732	0.703069	0.0723703	0.71947	0.0186796	0.922352	0.0103826	1	0.115092	0.423998	0.151254	0.249248	0.0448597	0.906038	0.00869814	0.999179	-0.244516	0.00263399	0.051371	0.913538
AIFM2	NM_001198696	7057.8	-0.00826962	0.967623	0.040426	0.853207	0.0349278	0.825228	-0.0137678	1	-0.0483885	0.799768	-0.0311132	0.88722	-0.00564346	0.989259	-0.0229187	0.999179	-0.300502	4.77e-05	-0.0398215	0.932937
AIFM3	NM_144704	27.257	0.30231	0.699999	0.167584	NA	0.0378623	0.968118	0.172588	1	-0.566894	0.644535	0.508028	NA	1.22543	NA	0.150508	0.999179	-2.17806	2.34e-06	-0.868726	0.710635
AIG1	NM_001286587	1207.66	-0.0170389	0.941489	-0.0249106	0.931399	0.00323551	0.989073	0.0111073	1	0.0197254	0.942734	-0.0162209	0.959219	-0.0791614	0.787268	-0.0432152	0.999179	0.337491	0.000100681	0.0370955	0.94803
AIM2	NM_004833	3190.6	1.43525	1.18e-42	0.138063	0.560278	0.511566	1.71e-05	1.80875	1.04e-68	0.927838	3.17e-18	0.0418993	0.897758	0.0258602	0.967947	0.911799	1.8e-17	0.968617	2.99e-20	-0.50708	0.0832628
AIMP1	NM_001142415	5622.32	-0.00613036	0.972138	0.00666162	0.974421	0.0960988	0.322134	0.0833069	0.792721	0.0579783	0.676878	-0.011886	0.959219	-0.0583289	0.784924	0.0115354	0.999179	-0.0978867	0.157292	0.0643908	0.835888
AIMP2	NM_006303	6498.91	0.0282367	0.900144	0.0123492	0.968002	0.0120825	0.959412	0.02797	1	0.00817697	0.979373	0.0960444	0.636513	0.0851502	0.788415	-0.00271715	0.999179	-0.44508	9.3e-07	-0.0197064	0.975812
AIP	NM_003977	10418.4	-0.0415544	0.782103	-0.00323703	0.990549	-0.0344576	0.810399	-0.0727749	0.928249	-0.0994578	0.422308	-0.0431278	0.809005	0.0258053	0.943665	-0.0305247	0.999179	-0.413346	5.72e-10	-0.0575566	0.875977
AIPL1	NM_001285403	0.282076	-0.720253	NA	-1.67261	NA	-0.0184254	NA	0.933834	NA	0.823283	NA	0.785659	NA	0.158035	NA	0.195656	NA	-1.67945	NA	1.54393	NA
AIRE	NM_000383	6.15071	0.200975	NA	1.23921	NA	1.10624	NA	0.0680132	NA	-0.186435	NA	-0.0688407	NA	0.730126	NA	0.612533	NA	-0.536655	0.645932	-0.388094	NA
AIRN	NR_047511	0.0730499	0	NA	0	NA	0	NA	0	NA	0	NA	1.6404	NA	0	NA	-1.62064	NA	-0.0322424	NA	-0.0754909	NA
AJAP1	NM_001042478	0.982068	0.73712	NA	1.19169	NA	-0.768309	NA	-1.22287	NA	1.35134	NA	0.420902	NA	-2.23589	NA	-1.30547	NA	-0.017726	NA	0.613834	NA
AJM1	NM_001080482	295.305	0.183232	0.535122	-0.0938721	0.835086	-0.373787	0.0767723	-0.0966823	1	-0.15132	0.614413	-0.330284	0.129476	-0.110624	0.844994	0.0683391	0.999179	0.915321	3.27e-10	-0.334212	0.668262
AJUBA	NM_001289097	49.4779	-0.3443	0.471086	0.00224781	0.998359	-0.0136087	0.984632	-0.360156	0.764775	-0.598023	0.15198	-0.44467	NA	0.577687	NA	0.424335	0.624846	-0.412589	0.151512	-0.253421	0.854023
AK1	NM_000476	361.146	-0.234679	0.46951	-0.163051	0.707767	-0.100617	0.779966	-0.172244	0.960156	-0.401063	0.109631	-0.488568	0.0433885	-0.0663525	0.943665	0.0211523	0.999179	0.12337	0.558219	-0.166171	0.854023
AK2	NM_001319143	10791.1	0.0739483	0.525983	0.0305226	0.867105	-0.0317389	0.802639	0.0116868	1	-0.0445531	0.765459	-0.0340983	0.836506	0.015323	0.966661	0.00486822	0.999179	-0.118801	0.0700187	-0.118181	0.695125
AK3	NM_016282	6485.46	-0.131947	0.353865	-0.074768	0.708137	0.0694939	0.639821	0.0123148	1	0.120049	0.40049	0.00604918	0.984672	-0.0207594	0.966534	0.0932409	0.83806	0.267302	0.00106153	0.252258	0.537477
AK4	NM_013410	7133.2	-0.0363747	0.882103	-0.16143	0.40066	-0.017744	0.945695	0.107311	0.934879	0.0212225	0.949011	-0.0299345	0.927026	0.00271482	0.997455	0.0538718	0.999179	0.524666	1.85e-07	0.0578901	0.928051
AK5	NM_174858	0.606478	-0.0399949	NA	1.3933	NA	1.31555	NA	-0.117675	NA	-1.16955	NA	-3.05186	NA	-0.724837	NA	1.15738	NA	1.88201	NA	-1.12914	NA
AK6	NM_016283	3981.93	-0.111411	0.582269	-0.0575372	0.850192	0.131333	0.442009	0.0774592	1	0.0681795	0.796003	-0.0258175	0.941057	-0.0266321	0.966534	0.0673649	0.99388	-0.00359968	0.982062	0.179831	0.719138
AK7	NM_001350892	46.4724	-0.046622	0.955884	-0.210315	0.821545	0.369166	0.482864	0.532859	0.572343	-0.457799	0.384479	0.200039	NA	0.621265	NA	-0.0365733	0.999179	0.651491	0.0463495	-0.410848	0.783728
AK8	NM_152572	16.0884	0.103941	0.941403	0.569439	NA	0.304946	NA	-0.160552	1	0.0499884	0.973129	0.0558586	NA	-0.440985	NA	-0.446855	0.928359	0.904559	0.0984731	-0.0536868	0.990293
AK9	NM_145025	318.785	-0.151473	0.578464	-0.0647106	0.879725	0.206694	0.342333	0.119932	0.993159	0.175945	0.480789	-0.0405901	0.924713	-0.0683061	0.917299	0.148229	0.865023	0.20052	0.188333	0.327674	0.650725
AKAIN1	NM_001145194	0.33557	-1.02453	NA	-0.0252307	NA	0	NA	-0.989651	NA	1.5084	NA	-0.176038	NA	-1.48867	NA	0.195655	NA	-0.0322589	NA	2.53272	NA
AKAP1	NM_003488	9815.98	0.0179484	0.845415	-0.128078	0.0116275	-0.149971	0.00139832	-0.00394446	1	-0.17771	8.16e-05	-0.114537	0.0371419	-0.108218	0.0736395	-0.171391	0.00031069	-0.327884	1.21e-17	-0.195364	0.050459
AKAP10	NM_007202	3161.08	0.0486583	0.654169	-0.0447573	0.750603	-0.0684431	0.433478	0.0249724	1	0.0215737	0.892207	-0.0476026	0.704805	-0.0524319	0.773552	0.0167443	0.999179	-0.14863	0.00717594	-0.0267754	0.93565
AKAP11	NM_016248	17661.4	-0.155787	0.426539	0.13289	0.564321	0.272642	0.0581063	-0.0160347	1	0.0727454	0.788279	0.155304	0.438841	0.00656559	0.991237	-0.0759925	0.989185	-0.264941	0.0187759	0.228796	0.675072
AKAP12	NM_005100	253.129	0.278915	0.639028	0.004719	0.996849	0.455173	0.310633	0.729369	0.12836	0.164478	0.826819	0.33044	0.572651	0.738371	0.0791779	0.57241	0.326355	1.13245	9.49e-05	-0.114206	0.952482
AKAP13	NM_001270546	22679.4	0.022901	0.898699	0.0677139	0.712502	0.00669298	0.972107	-0.0381199	1	0.00738078	0.97545	-0.0609852	0.731938	-0.0786961	0.734499	-0.0103302	0.999179	0.350835	1.39e-06	-0.0152208	0.976475
AKAP14	NM_001008535	1.07631	-3.45214	NA	-1.49631	NA	1.88289	NA	-0.072884	NA	-0.595182	NA	0.108478	NA	0.571232	NA	-0.132415	NA	-0.53306	0.851494	2.85694	NA
AKAP17A	NR_027383	18949.7	0.136691	0.24304	0.0656651	0.70366	-0.00950062	0.958953	0.0615257	0.991253	0.00467995	0.984954	0.140654	0.208968	0.162553	0.153827	0.0265788	0.999179	0.370937	6.19e-08	-0.131675	0.699972
AKAP3	NM_001278309	124.926	0.248269	0.386355	0.169596	0.652712	0.00814003	0.98453	0.0868136	1	0.11925	0.758321	-0.107345	0.796772	-0.201342	0.659502	0.0252531	0.999179	0.00662477	0.978482	-0.128677	0.883201
AKAP4	NM_139289	0.247778	0.0395539	NA	-1.66569	NA	-1.73299	NA	0	NA	0	NA	0	NA	2.20754	NA	2.24516	NA	-1.6727	NA	-0.177643	NA
AKAP5	NM_004857	1081.56	-0.206966	0.261229	0.596365	2.62e-07	0.639714	2.93e-08	-0.163617	0.656414	-0.0285969	0.931113	0.524703	9.93e-06	0.357023	0.0106596	-0.196277	0.425367	0.197191	0.091851	0.178667	0.734314
AKAP6	NM_004274	646.51	0.242881	0.422049	0.265861	0.389229	0.209285	0.438177	0.186304	0.900811	0.420953	0.0477452	0.365257	0.124467	0.138548	0.806578	0.194244	0.797035	1.11465	1.89e-12	0.178382	0.824657
AKAP7	NM_016377	140.173	-0.210857	0.654188	0.3532	0.406069	0.356352	0.318205	-0.207704	0.976684	0.0255184	0.972396	0.163771	0.773984	0.19249	0.814829	0.0542368	0.999179	0.0327186	0.914782	0.236559	0.835007
AKAP8	NM_005858	8756.16	0.101769	0.112366	-0.145354	0.00647281	-0.176345	0.000316942	0.0707781	0.589545	-0.0407107	0.664846	-0.0843149	0.223323	-0.0356383	0.826402	0.00796591	0.999179	-0.178952	2.43e-05	-0.142158	0.465128
AKAP8L	NM_014371	8212.79	0.0702697	0.536113	-0.0218953	0.911499	-0.106162	0.229905	-0.0139971	1	-0.036362	0.815298	0.0130023	0.951165	0.0189844	0.9557	-0.0303799	0.999179	0.111788	0.0805241	-0.106338	0.711476
AKAP9	NM_005751	9487.79	-0.0850569	0.707714	-0.0154257	0.966043	0.0967865	0.621008	0.0271553	1	0.190924	0.274395	0.205522	0.242066	0.0626106	0.900639	0.0480134	0.999179	0.108277	0.384978	0.276259	0.626998
AKIP1	NM_020642	2852.43	0.073407	0.317674	0.0314439	0.787106	0.016692	0.855382	0.0586551	0.763018	0.14173	0.0101765	0.0431058	0.667171	0.138263	0.0188814	0.236887	5.5e-07	-0.523526	1.43e-36	0.0686249	0.740699
AKIRIN1	NM_024595	18199.8	-0.0164975	0.900267	-0.115126	0.171951	-0.129637	0.0786563	-0.0310085	1	-0.0165504	0.92011	-0.170028	0.0161524	-0.129486	0.131087	0.0239922	0.999179	0.363698	3.11e-12	0.000224873	0.999057
AKIRIN2	NM_018064	11311.7	-0.0145941	0.915034	0.246478	5.69e-05	0.192542	0.00298347	-0.0685296	0.83358	-0.0695972	0.491721	0.149553	0.043811	0.1686	0.0215456	-0.0505506	0.928359	0.365591	2.2e-12	-0.0546838	0.838712
AKNA	NM_001317952	43302.1	-0.0684251	0.678555	0.152918	0.24678	0.056208	0.715009	-0.165135	0.321557	-0.136781	0.301731	0.147859	0.26473	0.112019	0.575482	-0.172621	0.262709	-0.258533	0.00137646	-0.0680113	0.872784
AKNAD1	NM_152763	0.725007	2.80938	NA	0	NA	-0.326848	NA	2.50772	NA	-0.371007	NA	-1.16099	NA	-1.52274	NA	-0.73278	NA	2.84319	NA	-3.17983	NA
AKR1A1	NM_001202414	15043.9	0.0165377	0.923845	0.166934	0.0815585	0.155294	0.0915608	0.00489718	1	0.0503166	0.756401	0.135747	0.202742	0.101283	0.519229	0.0158533	0.999179	0.184921	0.00727083	0.0341005	0.934622
AKR1B1	NM_001628	12193.6	0.015188	0.948109	0.076897	0.744867	0.0330426	0.869394	-0.0286663	1	0.0149039	0.960291	0.0726069	0.742256	0.0623052	0.871853	0.00460226	0.999179	-0.401536	6.9e-06	5.55e-05	0.999751
AKR1B10	NM_020299	0.198345	-2.41975	NA	-2.38224	NA	0	NA	0	NA	-0.138364	NA	-1.13777	NA	-0.803714	NA	0	NA	-1.42794	NA	2.28181	NA
AKR1B15	NM_001080538	2.34186	-3.93807	NA	-0.801838	NA	1.91851	NA	-1.21767	NA	-0.112138	NA	0.471602	NA	0.382	NA	-0.201737	NA	0.0997477	0.958409	3.82667	NA
AKR1C1	NM_001353	6.17001	0.766982	NA	0.0275359	NA	-1.51575	NA	-0.776305	NA	-0.334117	NA	0.987091	NA	0.602982	NA	-0.718224	NA	2.3446	0.0265141	-1.1007	NA
AKR1C2	NM_001135241	0.299754	0	NA	0	NA	0.971285	NA	0.933784	NA	2.88936	NA	0	NA	-1.12163	NA	1.94341	NA	-0.032166	NA	2.95257	NA
AKR1C3	NM_003739	0.32733	0	NA	0.936488	NA	0	NA	-0.989652	NA	-0.176328	NA	-1.09534	NA	0.228692	NA	1.14764	NA	1.84897	NA	-0.113339	NA
AKR1C4	NM_001818	0.184697	0.883411	NA	0	NA	-0.936576	NA	0	NA	0	NA	2.30798	NA	1.11969	NA	-1.32642	NA	-0.0323314	NA	-1.02177	NA
AKR1C6P	NR_026743	0.53566	0	NA	0.936496	NA	0	NA	-0.989662	NA	-2.99048	NA	-1.16978	NA	3.55516	NA	1.73456	NA	2.81946	NA	-2.92703	NA
AKR1C8P	NR_027916	0.157407	0	NA	0	NA	0	NA	0	NA	0.823277	NA	0	NA	1.52678	NA	2.52602	NA	-0.0323881	NA	0.886532	NA
AKR1D1	NM_005989	2.47785	-2.53233	NA	-0.67711	NA	1.81717	NA	-0.0380148	NA	-0.0148991	NA	-0.567793	NA	0.328172	NA	0.881065	NA	2.07268	0.164298	2.5175	NA
AKR1E2	NR_073127	1.49171	0.572446	NA	0.767995	NA	-0.625574	NA	-0.821123	NA	-1.94714	NA	0.741525	NA	2.26341	NA	-0.425216	NA	2.67896	0.281009	-2.51973	NA
AKR7A2	NM_003689	6096.52	0.0253116	0.874544	0.0314387	0.879249	-0.0160113	0.920735	-0.0221384	1	-0.105096	0.373696	0.0198682	0.926486	0.0748847	0.718773	-0.0500795	0.983954	-0.261445	0.000102389	-0.130067	0.695447
AKR7A2P1	NR_002796	0.976931	-0.962661	NA	-0.13697	NA	2.28034	NA	1.45467	NA	-2.59735	NA	-0.223619	NA	3.95859	NA	1.58492	NA	0.575284	NA	-1.63433	NA
AKR7A3	NM_012067	57.249	0.562719	0.177926	0.394429	0.441285	-0.558561	0.131777	-0.390271	0.709382	0.217024	0.740429	0.0853354	NA	-0.403992	NA	-0.272304	0.91818	-0.213769	0.517468	-0.345223	0.792449
AKR7L	NR_040288	56.7413	-0.0803975	0.92904	0.0987729	0.93097	0.2945	0.6395	0.11533	1	-0.102087	0.922759	0.103151	NA	0.0127787	NA	-0.192459	0.999179	-0.0139535	0.978482	-0.021535	0.995136
AKT1	NM_001014431	22354.2	0.0464814	0.74097	-0.0642804	0.6841	-0.118612	0.226514	-0.00784991	1	-0.0193067	0.923909	-0.0201905	0.923883	-0.026329	0.938419	-0.0254452	0.999179	-0.421522	3.51e-11	-0.0654518	0.844105
AKT1S1	NM_001098633	4981.59	0.152534	0.336635	-0.18147	0.216354	-0.283788	0.0122633	0.0502149	1	-0.0259386	0.92482	-0.0430855	0.869275	0.000417312	0.999675	0.0175643	0.999179	0.349537	0.000110651	-0.178126	0.693675
AKT2	NM_001626	27924.9	0.113908	0.0743772	-0.0018551	0.991545	-0.0736148	0.273686	0.0421482	0.96794	0.0513863	0.559849	-0.0350074	0.748378	-0.00776516	0.980381	0.0786286	0.476154	0.0783743	0.101835	-0.062197	0.768784
AKT3	NM_001206729	657.383	-0.161902	0.399363	0.0457898	0.891379	0.0309274	0.900973	-0.176764	0.583701	-0.228335	0.166602	-0.0943612	0.713676	-0.0137274	0.984307	-0.147701	0.745228	-0.3898	0.000329993	-0.0661597	0.919979
AKTIP	NM_001308325	1259.25	-0.219331	0.0538836	0.0813288	0.667963	0.117238	0.359657	-0.183422	0.209498	-0.180804	0.126276	-0.0076583	0.98037	0.0788486	0.777683	-0.094297	0.83806	-0.164871	0.056531	0.0388043	0.939768
ALAD	NM_000031	3342.09	-0.136053	0.0627753	-0.0600504	0.59517	-0.00133308	0.992742	-0.0773359	0.691145	-0.131163	0.062276	-0.0233456	0.87698	0.0727317	0.572561	-0.0350853	0.989185	-0.0850853	0.130994	0.00518561	0.991473
ALAS1	NM_199166	19186.7	-0.0168051	0.924276	0.0484872	0.7999	0.00250225	0.989254	-0.0627901	0.977287	-0.0095358	0.96525	0.115266	0.328256	0.0646855	0.780918	-0.0601163	0.951073	0.310148	4.22e-06	0.00760982	0.989831
ALAS2	NM_001037967	0.139605	-1.02444	NA	1.12236	NA	0	NA	-2.13691	NA	0	NA	0	NA	0	NA	0	NA	-0.99419	NA	0.886533	NA
ALB	NM_000477	7.31903	0.0276775	NA	-0.338824	NA	-0.670258	NA	-0.303758	NA	0.314824	NA	0.311862	NA	-0.0986278	NA	-0.0956661	NA	0.978013	0.225288	0.287668	NA
ALCAM	NM_001627	15084.1	-0.14237	0.34871	0.267859	0.0157592	0.370638	0.000157751	-0.0395906	1	0.0101296	0.971104	0.235299	0.0485398	0.140225	0.452506	-0.084944	0.91198	0.67092	5.27e-16	0.152781	0.713338
ALDH16A1	NM_153329	9510.91	0.0731762	0.853966	0.113512	0.814128	0.0110971	0.98071	-0.0292391	1	0.139064	0.730424	0.216675	0.526029	0.101519	0.898194	0.0239082	0.999179	-0.540138	0.00186208	0.0662422	0.953643
ALDH18A1	NM_002860	23308.5	0.0246759	0.865655	0.0295482	0.876618	0.0110281	0.943767	0.00615573	1	-0.00232487	0.991994	0.162458	0.0639887	0.143402	0.156306	-0.0213809	0.999179	0.177832	0.00511519	-0.0266726	0.947542
ALDH1A1	NM_000689	0.794879	0	NA	0	NA	3.43113	NA	3.39362	NA	0.797677	NA	0.826553	NA	0.214492	NA	0.185616	NA	1.816	NA	0.860897	NA
ALDH1A2	NM_170697	4.41954	-1.85105	NA	-0.297072	NA	3.12117	NA	1.56721	NA	-0.553118	NA	-0.173874	NA	0.794713	NA	0.41547	NA	1.64168	0.166167	1.29746	NA
ALDH1A3	NM_000693	11.2168	-0.626224	NA	-0.473026	NA	0.500988	NA	0.347791	1	-1.1674	NA	-1.23967	NA	-0.362487	NA	-0.290216	0.999179	1.08825	0.233985	-0.541133	NA
ALDH1B1	NM_000692	5848.45	-0.030996	0.859995	0.0914152	0.570979	0.0569396	0.689152	-0.0654715	0.992102	-0.222653	0.0239619	0.112218	0.420534	0.219676	0.0436701	-0.115195	0.633772	-0.678836	4.75e-21	-0.191352	0.62922
ALDH1L1	NM_012190	14.7172	-0.205583	NA	0.565338	NA	0.517451	NA	-0.253469	1	-0.190093	NA	-0.467368	NA	0.0403081	NA	0.317583	0.991067	1.43905	0.00820945	0.0158882	0.997952
ALDH1L1-AS1	NR_046602	0.125929	0	NA	0	NA	0	NA	0	NA	1.70246	NA	0	NA	-0.720942	NA	1.15733	NA	-0.0322754	NA	1.76558	NA
ALDH1L1-AS2	NR_046383	0.0571177	1.42883	NA	0	NA	-1.48185	NA	0	NA	0	NA	0	NA	0	NA	0	NA	-0.0325349	NA	-1.56696	NA
ALDH1L2	NM_001034173	1199.87	-0.0514088	0.926478	0.183867	0.738797	0.26588	0.449814	0.0306047	1	-0.0848953	0.89116	0.00852662	0.991302	0.178816	0.814829	0.0853942	0.999179	1.38839	1.18e-11	-0.0332279	0.98401
ALDH2	NM_000690	3059.24	-0.207822	0.174956	0.137744	0.467962	0.265679	0.0338854	-0.079887	1	-0.0899531	0.670952	0.149601	0.38296	0.196302	0.24803	-0.043253	0.999179	0.226633	0.0245787	0.118182	0.80076
ALDH3A1	NM_001330150	8.26127	-0.192247	NA	0.20061	NA	0.613721	NA	0.220864	NA	-0.202456	NA	0.410781	NA	0.29172	NA	-0.321515	NA	0.415965	0.64374	-0.0102338	NA
ALDH3A2	NM_000382	3919.67	-0.147347	0.309718	0.0119938	0.966043	0.0150483	0.943485	-0.144292	0.541113	-0.030698	0.905031	0.0794783	0.678668	-0.0300746	0.945619	-0.140251	0.538926	-0.276202	0.00112967	0.116933	0.77094
ALDH3B1	NM_001161473	3.21636	-2.21349	NA	-0.704482	NA	2.22658	NA	0.717597	NA	-0.333289	NA	-0.557162	NA	-0.723059	NA	-0.499187	NA	2.10136	0.075591	1.88096	NA
ALDH3B2	NM_001031615	4.4087	-0.421207	NA	0.120405	NA	-1.30021	NA	-1.84183	NA	-0.349992	NA	-0.855523	NA	-1.06848	NA	-0.562948	NA	-1.6906	0.0719108	0.0715926	NA
ALDH4A1	NM_003748	5547.17	0.0176441	0.946069	0.0960998	0.689929	0.0145705	0.955562	-0.0638851	1	0.0177506	0.957199	0.15507	0.382371	0.0984992	0.765049	-0.03882	0.999179	0.318999	0.00155301	0.000451609	0.999057
ALDH5A1	NM_001080	5223.1	-0.0847928	0.591122	0.0972231	0.574995	0.10541	0.420933	-0.0766057	0.967934	-0.0252615	0.91859	0.149443	0.265056	-0.00374771	0.99311	-0.178452	0.239939	-0.361475	5.92e-06	0.0598552	0.895522
ALDH6A1	NM_005589	2393.82	-0.0401102	0.748114	0.02014	0.915227	4.46e-05	0.9998	-0.0602056	0.936672	0.0121089	0.947777	0.0208559	0.905157	-0.0384557	0.87528	-0.0472028	0.965116	0.164153	0.00564758	0.0525139	0.860633
ALDH7A1	NM_001182	502.851	-0.150847	0.658259	0.00565848	0.993124	0.0832755	0.812805	-0.0732304	1	-0.0839506	0.858417	0.0329337	0.958279	0.0619305	0.945426	-0.0549537	0.999179	-0.378563	0.032804	0.0672275	0.952467
ALDH8A1	NM_170771	44.2838	-0.494171	0.319206	0.0348115	0.970175	0.441758	0.318524	-0.0872246	1	-0.0459417	0.962425	-0.144475	NA	0.038895	NA	0.137428	0.999179	-0.756018	0.0127603	0.448507	0.753598
ALDH9A1	NM_000696	8302.96	-0.16921	0.114379	-0.0692553	0.686479	-0.0117264	0.949114	-0.111681	0.644129	-0.0644222	0.687574	-0.0591028	0.730465	-0.0562521	0.837637	-0.0615715	0.956268	-0.165196	0.027363	0.105068	0.759457
ALDOA	NM_184043	179441	-0.0333352	0.886786	-0.0327838	0.919161	0.0383913	0.856641	0.0378399	1	-0.16288	0.320227	-0.117465	0.55635	0.0968657	0.764836	0.0514504	0.999179	0.305212	0.00208563	-0.129239	0.782664
ALDOB	NM_000035	1.21025	2.11131	NA	0.0627524	NA	-1.15238	NA	0.896146	NA	0	NA	2.98246	NA	3.50305	NA	0.382207	NA	-1.97515	0.534769	-2.24923	NA
ALDOC	NM_005165	12709.8	-0.370329	0.71152	-0.544193	0.601891	0.00642925	0.995432	0.180294	1	-0.51648	0.592203	-0.479397	0.648466	0.165403	0.947606	0.12832	0.999179	1.05008	0.03506	-0.145869	0.966235
ALG1	NM_019109	5052.9	-0.0102971	0.960376	0.0184821	0.940778	0.0039557	0.984632	-0.0248235	1	-0.0532614	0.779509	0.0631037	0.732762	0.0680597	0.802661	-0.0483054	0.993961	-0.173644	0.0308075	-0.0426642	0.928832
ALG10	NM_032834	1015.8	-0.22485	0.522194	-0.0517214	0.932092	0.170298	0.612269	-0.00283048	1	0.0488053	0.931817	0.0466242	0.938925	-0.0587673	0.95632	-0.0565862	0.999179	-0.0378607	0.876497	0.273826	0.759457
ALG10B	NM_001013620	1546.78	-0.277465	0.42436	0.0263684	0.96744	0.225955	0.481666	-0.077878	1	0.0146596	0.982177	-0.0070739	0.991447	-0.042563	0.971547	-0.0208295	0.999179	0.18272	0.412225	0.292334	0.752726
ALG11	NM_001004127	5920.94	0.0776112	0.383029	-0.00906597	0.955687	-0.033527	0.73025	0.0531502	0.927869	0.137985	0.0329996	0.0766477	0.385634	-0.0450146	0.789887	0.0163223	0.999179	0.204707	3.38e-05	0.0606699	0.801524
ALG12	NM_024105	4492.52	0.112318	0.281246	0.131604	0.162579	0.0621505	0.563466	0.0428645	1	-0.0416462	0.779845	0.149924	0.0814764	0.216698	0.00435129	0.0251281	0.999179	0.550435	1.9e-21	-0.153652	0.627205
ALG13	NR_136735	972.689	-0.08369	0.770229	-0.0499964	0.905773	0.0304829	0.922792	-0.00321063	1	-0.0511089	0.895346	-0.148121	0.584525	-0.105187	0.830557	-0.00817495	0.999179	0.213655	0.134731	0.0328414	0.971437
ALG14	NM_144988	1004	-0.0923248	0.462293	-0.0528775	0.776466	0.0206541	0.895786	-0.0187932	1	0.0795306	0.566665	-0.0559942	0.741005	-0.0500878	0.858417	0.085437	0.798581	-0.23978	0.000593428	0.17214	0.637347
ALG1L	NM_001015050	14.0891	0.326662	NA	-0.719918	NA	-0.821582	NA	0.224997	1	0.669424	NA	0.502167	NA	-0.491603	NA	-0.324346	0.999179	-0.592982	0.417057	0.343114	0.92763
ALG1L2	NM_001136152	46.9504	0.273279	0.676086	0.320181	0.668437	-0.0208964	0.979706	-0.0677983	1	-0.189874	0.755369	0.0328791	NA	0.109598	NA	-0.113155	0.999179	1.48817	1.91e-07	-0.462732	0.738545
ALG1L9P	NR_073386	15.9814	-0.24996	NA	-0.523391	NA	-0.424472	NA	-0.151042	1	0.194818	NA	0.265568	NA	-0.123989	NA	-0.194738	0.999179	1.00519	0.0371935	0.444966	0.849011
ALG2	NM_033087	5922.13	0.0830985	0.271206	-0.0925937	0.190266	-0.0302411	0.726851	0.145451	0.014215	0.00872614	0.950223	-0.0734253	0.326366	-0.0306979	0.865379	0.0514535	0.825178	0.554637	2.24e-40	-0.0740954	0.727843
ALG3	NM_005787	6265.59	0.079333	0.558376	0.00736355	0.974421	-0.0524603	0.691054	0.0195092	1	-0.129945	0.242097	0.0120426	0.963108	0.122533	0.385952	-0.0194546	0.999179	-0.0370278	0.667441	-0.208942	0.568164
ALG5	NM_013338	3526.45	-0.0551945	0.716378	0.0598065	0.749348	0.0907883	0.439086	-0.0242127	1	-0.0775731	0.592145	-0.0307848	0.88245	0.0387808	0.910022	-0.00800741	0.999179	0.27126	0.000143573	-0.0221068	0.966235
ALG6	NM_013339	1300.32	-0.305755	0.40252	-0.0681674	0.919229	0.289256	0.369173	0.0516688	1	0.0480483	0.940223	0.0190114	0.98066	-0.031677	0.982941	-0.0026401	0.999686	-0.205727	0.383805	0.353983	0.719138
ALG8	NM_024079	3361.85	-0.0738309	0.686188	0.00520139	0.988302	0.142733	0.289897	0.0637011	1	0.0874595	0.642134	0.0591774	0.791225	0.00649933	0.989359	0.0347814	0.999179	-0.10667	0.286661	0.161571	0.707189
ALG9	NM_001352413	2999.28	0.0132018	0.909386	-0.0172359	0.911806	-0.0797653	0.261713	-0.0493277	0.933994	0.00171973	0.991994	-0.00311292	0.985836	-0.00939094	0.976553	-0.0045583	0.999179	0.17894	0.000119323	-0.0111799	0.971992
ALK	NM_001353765	0.670894	-1.47372	NA	-2.03176	NA	-0.585902	NA	-0.0278771	NA	-2.37013	NA	-2.40775	NA	0.158024	NA	0.195647	NA	0.192846	NA	-0.896525	NA
ALKAL1	NM_207413	0.2377	-1.79963	NA	-0.800338	NA	0.971293	NA	-0.0278367	NA	0	NA	1.72212	NA	0	NA	-1.70248	NA	-1.76935	NA	1.66143	NA
ALKAL2	NM_001002919	0.366357	1.85043	NA	-0.0252322	NA	-2.86509	NA	-0.989648	NA	0	NA	2.3075	NA	0	NA	-2.28784	NA	-0.99418	NA	-1.98826	NA
ALKBH1	NM_006020	2145.92	0.0654096	0.516617	-0.0398336	0.786518	-0.039879	0.691054	0.0653641	0.851368	0.0251885	0.867073	-0.031045	0.825853	-0.0356537	0.875359	0.0205798	0.999179	-0.0694254	0.250015	-0.0399281	0.894133
ALKBH2	NM_001145374	1663.99	-0.103297	0.397241	-0.0248172	0.911806	0.0173656	0.915269	-0.061114	0.984886	-0.240215	0.00319895	-0.114422	0.327455	0.103247	0.520938	-0.0225456	0.999179	-0.0403255	0.62649	-0.136614	0.685893
ALKBH3	NM_139178	3293.65	0.0691993	0.624037	0.0518839	0.789618	0.00759874	0.966607	0.0249141	1	-0.0639345	0.686854	-0.0194383	0.932634	0.077931	0.719276	0.0334348	0.999179	0.0545461	0.518488	-0.132789	0.699972
ALKBH3-AS1	NR_038907	0.0867685	0	NA	0	NA	0.971353	NA	0.933853	NA	0	NA	0	NA	1.11973	NA	1.15735	NA	-0.0323561	NA	-0.075329	NA
ALKBH4	NM_017621	2330.59	0.0691176	0.713978	0.0314263	0.914093	-0.060813	0.724799	-0.0231217	1	-0.104026	0.556538	0.0212292	0.944441	0.0644815	0.858967	-0.0607741	0.989185	-0.0503284	0.645152	-0.172793	0.695068
ALKBH5	NM_017758	17342.4	-0.0328782	0.764858	-0.118892	0.108081	-0.1393	0.0325819	-0.0532871	0.930187	-0.045274	0.689547	-0.0353571	0.784032	0.0255637	0.918939	0.0156468	0.999179	-0.0133747	0.838386	-0.0120666	0.971992
ALKBH6	NM_032878	3041.09	0.139922	0.20056	0.0704156	0.657495	-0.0544177	0.664779	0.0150887	1	0.0171696	0.935015	0.0372035	0.837716	0.0347918	0.916161	0.0147579	0.999179	0.086624	0.257024	-0.122413	0.708327
ALKBH7	NM_032306	5207.93	-0.00362481	0.986526	0.0545966	0.803829	0.0569428	0.7035	-0.00127866	1	-0.0635872	0.730718	0.0232581	0.925576	0.126085	0.465159	0.0392394	0.999179	0.0378685	0.698388	-0.0596072	0.892188
ALKBH8	NM_138775	2161.08	-0.123671	0.449996	0.0693618	0.776466	0.157009	0.244556	-0.0360236	1	0.0499938	0.840343	0.0872526	0.673257	-0.0671925	0.853529	-0.104451	0.843749	-0.577601	4.63e-11	0.173934	0.696344
ALLC	NM_018436	0.262162	0	NA	0.936436	NA	0	NA	-0.9896	NA	-1.9817	NA	-2.98111	NA	-0.803722	NA	0	NA	2.77205	NA	-1.91774	NA
ALMS1	NM_015120	4099.22	-0.0571827	0.727975	-0.0238552	0.925767	-0.080578	0.552213	-0.113906	0.708394	0.0655068	0.715881	0.166728	0.160424	-0.0585864	0.84653	-0.159808	0.311686	-0.249496	0.00143192	0.123032	0.740235
ALMS1-IT1	NR_046762	64.8696	-0.136275	0.826887	-0.107739	0.903912	0.118476	0.840706	0.0899396	1	0.20911	0.749871	0.0733937	0.934819	-0.334418	0.672596	-0.198702	0.988021	-0.174478	0.601477	0.345818	0.794942
ALMS1P1	NR_003683	14.4137	2.04347	NA	-0.523086	NA	-0.322855	NA	2.2437	0.00868535	2.52089	NA	-0.349145	NA	-0.299937	NA	2.5701	2.82e-05	0.469254	0.55578	0.47777	0.87168
ALOX12	NM_000697	9.95705	-0.205586	NA	-1.33838	NA	-0.705368	NA	0.427426	1	0.0347215	NA	-0.264536	NA	-0.17696	NA	0.122298	0.999179	-0.0222651	0.980904	0.240421	NA
ALOX12-AS1	NR_040089	239.046	-0.102179	0.713031	-0.112304	0.743859	0.0147756	0.965758	0.0249009	1	-0.124312	0.654467	-0.00916845	0.985117	0.0621808	0.922941	-0.0529628	0.999179	0.113684	0.456034	-0.0218447	0.982157
ALOX12B	NM_001139	16.927	-0.374245	0.822912	-0.295694	NA	0.221977	NA	0.143427	1	-0.301705	0.841934	-0.231373	NA	0.172792	NA	0.10246	0.999179	2.28985	0.000352537	0.0722208	0.989831
ALOX12P2	NR_120453	360.549	-0.0332181	0.91412	-0.171223	0.492805	-0.254877	0.156094	-0.116872	0.976684	0.147483	0.422671	-0.0976712	0.678967	-0.297509	0.0436802	-0.0523551	0.999179	1.21332	2.15e-29	0.181011	0.739276
ALOX15	NM_001140	12.4311	-0.882201	NA	-0.177144	NA	-0.0437566	NA	-0.748811	0.936137	-0.271524	NA	-0.484359	NA	0.26285	NA	0.475683	0.99388	-0.5552	0.508086	0.610822	0.873603
ALOX15B	NM_001141	5.39232	1.16321	NA	0.241624	NA	-0.443069	NA	0.478512	NA	-0.673384	NA	-0.616891	NA	-0.407847	NA	-0.46434	NA	2.84638	0.0115374	-1.83642	NA
ALOX15P1	NR_045985	99.9164	-0.205119	0.663916	0.064793	0.931321	0.131347	0.779829	-0.138566	1	0.0759331	0.913656	0.231346	0.648517	-0.186541	0.832232	-0.341954	0.649529	-0.158304	0.570133	0.281389	0.802619
ALOX5	NM_000698	3989.97	0.00142103	0.995796	0.253074	0.0775516	0.202973	0.16277	-0.0486803	1	-0.0455536	0.8723	0.186647	0.259396	0.253132	0.10043	0.0209308	0.999179	0.525416	1.01e-07	-0.0466439	0.942316
ALOX5AP	NM_001629	1564.88	-0.414289	0.0514571	-0.0101073	0.986868	0.185629	0.46572	-0.218553	0.726011	-0.187336	0.480912	0.00987885	0.985815	0.0606028	0.932786	-0.136612	0.923802	2.26543	2.26e-60	0.227264	0.752726
ALOXE3	NM_021628	4.99474	-0.524981	NA	-1.83326	NA	-1.28295	NA	0.0253161	NA	-0.969078	NA	0.267308	NA	-0.0543633	NA	-1.29075	NA	0.977091	0.343305	-0.443969	NA
ALPG	NM_031313	1.57921	-0.0704947	NA	0.809792	NA	-0.944436	NA	-1.82471	NA	-0.348492	NA	-1.44353	NA	-0.303764	NA	0.791269	NA	3.45933	0.100776	-0.278306	NA
ALPI	NM_001631	2.17419	-0.276867	NA	-0.882427	NA	-2.11453	NA	-1.50898	NA	0.71991	NA	-0.178822	NA	0.0276366	NA	0.926362	NA	0.353366	0.864453	0.996883	NA
ALPK1	NM_025144	6936.81	0.867934	6.91e-57	0.292851	4.79e-06	0.139531	0.0639098	0.714614	2.83e-39	0.773571	1.96e-48	0.195941	0.00488853	-0.0404526	0.853529	0.537178	3.74e-23	1.11689	1.24e-96	-0.0940212	0.730378
ALPK2	NM_052947	2179.23	0.132891	0.707635	-0.415612	0.0871682	-0.412762	0.0687469	0.13574	1	0.0817026	0.85654	-0.134533	0.732064	-0.281297	0.396485	-0.0650605	0.999179	2.31675	6.46e-50	-0.0508755	0.966235
ALPK3	NM_020778	14.6649	-0.335629	NA	0.0714484	NA	0.311404	NA	-0.0956732	1	-0.44573	NA	0.499326	NA	0.342671	NA	-0.602385	0.830297	-0.599247	0.30356	-0.109954	0.975948
ALPL	NM_001369804	1.18642	-0.375945	NA	0.0531148	NA	-0.219752	NA	-0.648804	NA	-1.6285	NA	-2.16221	NA	1.0217	NA	1.5554	NA	1.44306	0.577569	-1.25337	NA
ALPP	NM_001632	14.5428	-0.32044	NA	0.393788	NA	-0.552294	NA	-1.26652	0.394162	-0.269271	NA	-0.358165	NA	0.0750739	NA	0.163968	0.999179	1.30647	0.0295765	0.0513912	0.992752
ALS2	NM_020919	2024.6	-0.00648865	0.969827	-0.0461988	0.787757	-0.0966884	0.320323	-0.0569782	0.982556	-0.0623992	0.629396	0.0542925	0.70263	0.0289025	0.923981	-0.0877892	0.679489	0.257435	2.93e-05	-0.0556212	0.864532
ALS2CL	NM_147129	2.30017	-0.865521	NA	0.540202	NA	0.347798	NA	-1.05791	NA	1.21667	NA	1.38887	NA	-0.0392963	NA	-0.211494	NA	-1.4198	0.431979	2.08226	NA
ALX1	NM_006982	0.316243	-0.0349493	NA	-0.0252211	NA	1.52754	NA	1.51781	NA	-1.10019	NA	-1.13782	NA	0	NA	0	NA	-0.0323533	NA	-1.06454	NA
ALX3	NM_006492	2.05467	3.0398	NA	2.87656	NA	-1.6483	NA	-1.48506	NA	0.992784	NA	-0.160859	NA	0.590735	NA	1.74437	NA	1.85211	0.345901	-2.04614	NA
ALX4	NM_021926	1.01866	-0.72986	NA	0.269696	NA	0.0921841	NA	-0.907355	NA	-0.787681	NA	1.2491	NA	0.167934	NA	-1.86882	NA	-0.0314841	0.991982	-0.057042	NA
ALYREF	NM_005782	22199.3	0.0311204	0.879188	0.00582751	0.986672	-0.0197075	0.924491	0.00558535	1	0.00703688	0.98097	-0.004379	0.98876	-0.00898986	0.986985	0.00242601	0.999179	-0.438607	1.76e-07	-0.0237487	0.968493
AMACR	NM_001167595	1415.28	-0.0282277	0.881004	0.1862	0.105328	0.104559	0.411519	-0.109868	0.754503	0.0363768	0.868757	0.193109	0.0834018	0.0845034	0.725895	-0.0722284	0.928359	0.122326	0.158237	0.064915	0.877569
AMBN	NM_016519	1.21954	-4.27439	NA	-3.27509	NA	3.13706	NA	2.13779	NA	-2.62502	NA	-0.410931	NA	0.158016	NA	-2.05603	NA	-0.794902	0.757982	1.64895	NA
AMBP	NM_001633	19.0267	-0.0169364	0.991231	0.249836	NA	-0.71349	NA	-0.980262	0.590831	-0.550927	0.691408	-0.0446194	NA	0.948898	NA	0.442591	0.983693	-0.425456	0.549558	-0.533695	0.864903
AMBRA1	NM_001367471	8659.34	0.108895	0.384481	-0.0774647	0.626277	-0.17212	0.0687469	0.0142396	1	0.018246	0.933722	-0.0647745	0.687677	-0.0885508	0.649248	-0.00553035	0.999179	0.0305386	0.729218	-0.090315	0.791386
AMD1	NM_001634	17341.9	-0.157572	0.38296	0.0218144	0.947378	0.17152	0.264038	-0.00786627	1	0.0273244	0.930387	0.09027	0.702707	0.0364829	0.945426	-0.0264628	0.999179	-0.151021	0.178361	0.185158	0.707189
AMDHD1	NM_152435	36.7655	-0.0972875	0.939454	-1.15005	0.157193	-0.0708119	0.955562	0.981951	0.465492	0.288566	0.776313	0.103456	NA	0.0126293	NA	0.197739	0.999179	1.44723	0.0014189	0.386268	0.86946
AMDHD2	NM_001145815	2810.04	-0.0302772	0.830573	0.0963178	0.408565	0.0619404	0.574526	-0.0646545	0.934552	-0.108619	0.283408	0.0788912	0.518041	0.175707	0.0478439	-0.0118029	0.999179	0.0625661	0.384693	-0.0780215	0.795276
AMELX	NM_182680	0.348955	-1.02452	NA	-0.987018	NA	0	NA	0	NA	1.50642	NA	2.66094	NA	0.560005	NA	-0.594369	NA	-0.993792	NA	2.53116	NA
AMELY	NM_001143	0.0496316	0	NA	0	NA	0	NA	0	NA	0	NA	0	NA	1.11975	NA	1.15737	NA	-0.0324081	NA	-0.075225	NA
AMER1	NM_152424	2966.08	0.188069	0.060637	-0.09382	0.523564	-0.0970049	0.38998	0.184884	0.0993903	-0.0129329	0.955627	0.0684791	0.663864	0.0784972	0.711515	-0.00291471	0.999179	0.285841	4.78e-05	-0.200683	0.584763
AMER2	NM_199138	187.667	-0.0240486	0.97731	0.729506	0.0830285	0.636111	0.124608	-0.117444	1	0.362926	0.53582	0.825953	0.0442928	0.76063	0.0878991	0.297602	0.898746	-0.435244	0.193467	0.387319	0.790524
AMER3	NM_001105195	0.0864804	-1.90896	NA	-1.87145	NA	0	NA	0	NA	0	NA	0	NA	0	NA	0	NA	-1.87913	NA	1.77126	NA
AMFR	NM_001323511	10699.3	0.0214313	0.787308	0.0648452	0.297497	-0.0211813	0.769841	-0.0645952	0.496766	-0.11121	0.0185834	-0.0518881	0.455442	-0.077702	0.230598	-0.137024	0.00310053	-0.595731	3.02e-67	-0.132331	0.349577
AMH	NM_000479	40.0671	-0.365579	0.680479	0.028125	0.986868	0.496443	0.48747	0.10274	1	0.107727	0.930075	-0.00305709	NA	0.0995062	NA	0.21029	0.999179	0.516248	0.268071	0.47356	0.816651
AMHR2	NM_001164691	0.95083	2.08861	NA	2.70494	NA	-1.2517	NA	-1.86801	NA	-2.01298	NA	-0.598048	NA	-0.803773	NA	-2.21867	NA	1.84191	NA	-4.10099	NA
AMIGO1	NM_020703	163.404	-0.50404	0.0246993	-0.415728	0.0842011	-0.317016	0.21882	-0.405328	0.18516	-0.734443	0.00217187	-0.31028	0.366236	0.155421	0.853529	-0.268743	0.754597	-1.52508	6.3e-19	-0.230141	0.79956
AMIGO2	NM_001370299	3.17938	-0.318877	NA	-1.86199	NA	0.88783	NA	2.43092	NA	-0.498795	NA	-0.534203	NA	0.695792	NA	0.7312	NA	1.00284	0.463147	-0.17939	NA
AMIGO3	NM_198722	1292.01	0.0167279	0.950773	-0.344325	0.00933743	-0.355526	0.00508088	0.00552625	1	-0.121958	0.532415	-0.349625	0.00574037	-0.151575	0.523672	0.0760911	0.983693	0.862806	1.12e-18	-0.138385	0.777877
AMMECR1	NM_015365	4064.65	-0.0971023	0.682626	0.0934952	0.759448	0.145138	0.441361	-0.0454593	1	0.0470888	0.888384	0.0104877	0.980763	-0.0583331	0.916949	-0.021732	0.999179	0.753229	9.17e-12	0.144458	0.795227
AMMECR1L	NM_001199140	4657.46	-0.0105838	0.932687	-0.10665	0.14346	-0.0750629	0.313068	0.0210033	1	-0.0908255	0.226178	-0.0790275	0.342143	-0.0237764	0.920237	-0.0355744	0.983954	0.0558254	0.308161	-0.0799648	0.731714
AMN	NM_030943	45.3644	0.156948	0.809031	-0.0310213	0.974421	-0.415614	0.373638	-0.227645	1	0.15381	0.852813	-0.0868344	NA	-0.139621	NA	0.101024	0.999179	-0.281758	0.420287	-0.00270577	0.999057
AMN1	NM_001278412	285.835	-0.0797559	0.737211	-0.0133643	0.971453	0.121043	0.523995	0.0546512	1	0.15107	0.44811	-0.105902	0.673385	-0.0446452	0.936143	0.212327	0.384263	-0.0348513	0.807749	0.231066	0.675181
AMOT	NM_001113490	194.43	0.0543665	0.936596	0.181384	0.800752	0.723268	0.0209124	0.59625	0.149351	0.671808	0.0128393	0.245767	0.587675	0.303729	0.557598	0.729771	0.00803262	1.85228	1.04e-15	0.617731	0.623755
AMOTL1	NM_130847	396.661	-0.166407	0.814958	-0.0952976	0.927067	0.0602175	0.93912	-0.0108921	1	-0.0719211	0.941982	-0.0667498	0.952967	-0.0469007	0.983361	-0.0520721	0.999179	1.00817	0.00142498	0.0947278	0.966235
AMOTL2	NM_016201	68.2758	0.385949	0.743912	-0.168861	0.929005	0.0394729	0.978651	0.594283	0.926996	0.154988	0.911668	0.180531	0.894331	0.462279	0.752871	0.436736	0.922605	2.93225	4.95e-09	-0.230665	0.943725
AMPD1	NM_001172626	4.90856	0.132333	NA	0.341018	NA	0.874774	NA	0.666089	NA	-0.942808	NA	-0.967779	NA	0.791083	NA	0.816054	NA	0.772584	0.42543	-1.07531	NA
AMPD2	NM_004037	9751.55	-0.0876403	0.51583	-0.216228	0.0194031	-0.220753	0.0131663	-0.0921651	0.814056	-0.177115	0.0697238	0.00883633	0.974543	0.0226397	0.95632	-0.163312	0.197336	0.288514	4.21e-05	-0.0891443	0.795276
AMPD3	NM_001025389	5041.05	-0.123143	0.385339	0.15238	0.243905	0.1957	0.0669139	-0.0798237	0.948465	-0.348374	0.000101303	0.181076	0.129941	0.298875	0.0028707	-0.230575	0.044562	-0.284436	0.000361539	-0.224953	0.586367
AMPH	NM_001635	6.66543	1.0471	NA	-1.62157	NA	0.185784	NA	2.85444	NA	0.0534213	NA	0.330465	NA	0.621407	NA	0.344364	NA	1.19201	0.190197	-0.993341	NA
AMT	NM_000481	329.24	-0.0249928	0.966264	0.253963	0.569177	0.147757	0.712052	-0.131199	1	-0.0515862	0.937356	0.0870092	0.88722	0.22229	0.734499	0.0836949	0.999179	-0.0481488	0.860783	-0.0262639	0.987856
AMTN	NM_001286731	0.0812771	0	NA	0	NA	0	NA	0	NA	0	NA	0	NA	1.93567	NA	1.97329	NA	-0.0324376	NA	-0.0751661	NA
AMY1A	NM_001008221_dup1	4.53961	1.11357	NA	2.0379	NA	1.70597	NA	0.781648	NA	0.265244	NA	0.511646	NA	-0.0589256	NA	-0.305327	NA	2.10425	0.12196	-0.848436	NA
AMY1B	NM_001008218_dup2	4.53961	1.11357	NA	2.0379	NA	1.70597	NA	0.781648	NA	0.265244	NA	0.511646	NA	-0.0589256	NA	-0.305327	NA	2.10425	0.12196	-0.848436	NA
AMY1C	NM_001346780_dup1	4.53961	1.11357	NA	2.0379	NA	1.70597	NA	0.781648	NA	0.265244	NA	0.511646	NA	-0.0589256	NA	-0.305327	NA	2.10425	0.12196	-0.848436	NA
AMY2A	NM_000699	2.80417	1.96013	NA	0.761939	NA	-1.00758	NA	0.190601	NA	-0.0616625	NA	-0.555476	NA	-1.08683	NA	-0.593021	NA	2.09285	0.148469	-2.02204	NA
AMY2B	NM_020978	292.215	-0.228734	0.642986	-0.178174	0.790472	0.0811418	0.883219	0.030582	1	0.0663041	0.929357	0.0174777	0.985117	-0.0870472	0.945505	-0.0382208	0.999179	-0.0547921	0.864164	0.295221	0.80363
AMZ1	NM_001284355	4350.6	-0.194472	0.749219	0.273449	0.68964	0.272922	0.591465	-0.194999	1	-0.273653	0.658977	0.19896	0.785528	0.136977	0.922941	-0.335636	0.828718	-2.2583	1.11e-16	-0.0788513	0.968493
AMZ2	NM_001346477	5324.18	0.0757762	0.630904	-0.0251662	0.923118	-0.036064	0.829982	0.0648784	1	-0.0701567	0.69109	-0.137061	0.305133	-0.0323973	0.936143	0.0345069	0.999179	0.315295	5.52e-05	-0.14562	0.702396
AMZ2P1	NR_026903	460.964	-0.123399	0.6391	-0.0163389	0.970175	0.0415342	0.889476	-0.0655255	1	0.0201112	0.960615	-0.255742	0.197429	-0.157484	0.649248	0.11837	0.92826	0.52534	3.36e-05	0.143769	0.818202
ANAPC1	NM_022662	12444.1	0.0579223	0.753366	0.00612638	0.985482	-0.080754	0.603441	-0.0289581	1	0.0743274	0.707719	0.129901	0.405427	0.0422379	0.921343	-0.0133359	0.999179	-0.255155	0.00363021	0.0167559	0.977276
ANAPC10	NM_001256711	1370.21	0.0423355	0.785763	-0.148667	0.185344	-0.150563	0.135019	0.040439	1	-0.0277809	0.897343	-0.0184982	0.937203	-0.116021	0.469493	-0.125304	0.503316	-0.199776	0.00651303	-0.0698019	0.847008
ANAPC11	NM_016476	4503.43	-0.00756073	0.976612	0.0494222	0.850303	0.100575	0.508768	0.0435922	1	-0.0545996	0.816864	-0.0729707	0.737142	0.0668758	0.852233	0.0852469	0.926745	-0.318619	0.000401232	-0.0466968	0.933525
ANAPC13	NM_015391	2794.06	-0.192922	0.35817	-0.178333	0.435463	0.101331	0.645002	0.0867424	1	-0.052633	0.877639	-0.111329	0.682191	-0.0935858	0.83793	-0.0348897	0.999179	0.0421638	0.782759	0.140507	0.808673
ANAPC15	NM_014042	5922.14	-0.00378668	0.98831	0.207545	0.142604	0.193778	0.146369	-0.0175534	1	0.053685	0.8305	0.159678	0.323804	0.10175	0.727928	-0.00424366	0.999179	-0.2693	0.00510401	0.0578425	0.919512
ANAPC16	NM_001242546	9751.06	-0.118245	0.0174375	0.089191	0.109822	0.139724	0.00190902	-0.0677125	0.497792	-0.0665866	0.27425	-0.0174237	0.872745	0.0338374	0.795063	-0.0153255	0.999179	0.342087	2.12e-21	0.0519491	0.775013
ANAPC1P1	NR_037931	11.7633	-0.0272536	NA	-0.656321	NA	-0.253226	NA	0.375841	1	0.549322	NA	1.08554	NA	-0.0784422	NA	-0.614657	0.822029	-0.581387	0.372699	0.576741	0.828793
ANAPC2	NM_013366	7396.48	0.0477778	0.643462	0.0212807	0.896406	-0.0133037	0.913247	0.0131934	1	-0.0557011	0.595398	0.00422348	0.981613	0.0716948	0.575824	0.0117702	0.999179	-0.062215	0.286201	-0.103154	0.683854
ANAPC4	NM_001286756	3563.11	-0.271784	0.316507	0.00123605	0.998697	0.293677	0.2032	0.0206566	1	0.0313335	0.950508	0.0641749	0.889456	0.0099469	0.990602	-0.0228945	0.999179	-0.171783	0.339192	0.303322	0.695068
ANAPC5	NM_016237	18749.4	0.0226585	0.874544	0.0562422	0.704204	0.028231	0.826188	-0.00535261	1	0.00530534	0.979619	0.0897752	0.414661	0.0631282	0.743117	-0.0213416	0.999179	-0.101678	0.122095	-0.0170262	0.967882
ANAPC7	NM_016238	7636.48	-0.0463796	0.699685	0.0336325	0.838919	0.0798233	0.381352	-0.000188804	1	0.0429183	0.758105	0.0798195	0.461935	0.00369248	0.99057	-0.0332086	0.996976	-0.243651	1.89e-05	0.0895986	0.747613
ANG	NM_001145	195.192	-0.375394	0.418917	-0.121235	0.876107	0.256472	0.574787	0.002313	1	-0.272846	0.573104	-0.00398297	0.997264	0.225249	0.783252	-0.0436137	0.999179	1.11819	4.24e-06	0.10277	0.949172
ANGEL1	NM_015305	3444.5	-0.0127441	0.909679	0.108187	0.0997968	0.0207661	0.829982	-0.100165	0.23683	-0.0166225	0.906166	0.0930373	0.205043	0.113977	0.113467	0.00431715	0.999179	-0.337826	2.24e-14	-0.00356931	0.99346
ANGEL2	NM_144567	3823.2	-0.131052	0.239991	0.0513442	0.777012	0.0993962	0.343912	-0.0829998	0.846885	0.00691385	0.974168	-0.0100444	0.968296	-0.0636585	0.778664	-0.0467003	0.989185	0.154913	0.0272409	0.138225	0.679225
ANGPT1	NM_001146	0.603463	0.730433	NA	-0.0252468	NA	0.961774	NA	1.71743	NA	2.15074	NA	-0.176053	NA	-3.09287	NA	-0.766147	NA	-0.032275	NA	1.42027	NA
ANGPT2	NM_001147	1.79439	3.72161	NA	3.18549	NA	-0.410692	NA	0.125427	NA	-0.350356	NA	-0.900134	NA	-0.345475	NA	0.204296	NA	3.84158	0.0756327	-4.07161	NA
ANGPT4	NM_015985	2.82734	0.729224	NA	-0.953745	NA	1.40067	NA	3.08361	NA	0.00243347	NA	-0.477246	NA	0.894338	NA	1.37401	NA	2.40024	0.162615	-0.727342	NA
ANGPTL1	NM_004673	0.453786	-1.02454	NA	1.39019	NA	2.00044	NA	-0.414143	NA	-1.62772	NA	-2.62714	NA	0.158016	NA	1.15736	NA	1.45686	NA	-0.602714	NA
ANGPTL2	NM_012098	35.331	-0.117991	0.921467	-0.385144	0.757365	-0.682586	0.370435	-0.415433	0.998992	-0.954027	0.156773	-0.0705708	NA	0.254941	NA	-0.628515	0.706672	0.725372	0.142659	-0.835516	0.707306
ANGPTL3	NM_014495	0.41239	3.49169	NA	0	NA	-3.54451	NA	0	NA	2.56842	NA	0	NA	-2.54867	NA	0	NA	-0.0325628	NA	-0.922548	NA
ANGPTL4	NM_139314	12.0925	0.509847	NA	0.371584	NA	0.491426	NA	0.629689	1	-0.302112	NA	-0.391424	NA	0.102212	NA	0.191524	0.999179	2.58695	0.00189574	-0.811578	0.838615
ANGPTL5	NM_178127	0.44374	-0.26794	NA	0.303977	NA	-1.74438	NA	-2.31628	NA	-1.10021	NA	-0.176046	NA	1.94048	NA	1.01635	NA	-1.02976	NA	-0.831973	NA
ANGPTL6	NM_031917	3208.81	-0.188406	0.188574	-0.15137	0.342573	-0.00189804	0.99343	-0.0389342	1	-0.152135	0.306485	-0.21339	0.105769	-0.0453622	0.919172	0.0158931	0.999179	0.00341511	0.979933	0.0365226	0.950602
ANGPTL7	NM_021146	0.530736	-0.888859	NA	-1.8028	NA	0.0199803	NA	0.933899	NA	-2.58761	NA	-0.753973	NA	3.00268	NA	1.16909	NA	0.638899	NA	-1.69817	NA
ANGPTL8	NM_018687	0.337727	-1.90943	NA	-1.87192	NA	0.971292	NA	0.93379	NA	2.59251	NA	1.64096	NA	-2.57281	NA	-1.62138	NA	-1.87922	NA	4.50251	NA
ANHX	NM_001191054	0.0429421	0	NA	0	NA	0	NA	0	NA	-1.10008	NA	-1.13771	NA	0	NA	0	NA	0.929284	NA	-1.03688	NA
ANK1	NM_001142445	188.554	0.0568868	0.914508	-0.146607	0.806969	-0.00930306	0.987413	0.194191	0.978406	-0.368866	0.202549	-0.17345	0.684141	0.181619	0.778116	-0.0137961	0.999179	1.49439	6.31e-15	-0.425463	0.673243
ANK2	NM_001354278	1022.31	0.436079	5.74e-05	0.158954	0.375994	-0.00753392	0.976502	0.269591	0.0605762	0.34684	0.00329033	2.8e-05	0.999992	0.0247303	0.966534	0.371543	0.00219757	-0.251495	0.0146911	-0.088888	0.861359
ANK3	NM_001204403	11.7173	-0.121901	NA	-0.305913	NA	0.199904	NA	0.383915	1	0.0987536	NA	0.0593266	NA	-0.431927	NA	-0.3925	0.99388	-1.09977	0.0664994	0.221178	0.952467
ANKAR	NM_144708	191.35	-0.113964	0.785785	-0.0168151	0.981311	0.333209	0.239025	0.23606	0.839693	0.30866	0.326958	0.27812	0.413528	0.0564933	0.959363	0.0870343	0.999179	0.00571285	0.984302	0.422846	0.66822
ANKDD1A	NM_182703	601.251	-0.150605	0.393421	0.0511271	0.859765	0.182307	0.209663	-0.0194257	1	-0.0172892	0.96155	-0.0164156	0.970097	-0.0516024	0.926187	-0.052476	0.999179	-1.43002	1.31e-46	0.133606	0.794799
ANKDD1B	NM_001276713	58.5025	-0.570923	0.350474	0.0763789	0.944562	0.347158	0.577887	-0.300144	0.99095	-0.00211472	0.998791	-0.178124	NA	-0.190446	NA	-0.0144369	0.999179	0.219848	0.588577	0.568936	0.729282
ANKEF1	NM_022096	478.512	-0.13051	0.622034	-0.0748107	0.848802	-0.00446992	0.990322	-0.0601691	1	-0.109095	0.70162	-0.172221	0.466829	-0.0180885	0.983361	0.0450373	0.999179	0.785082	3.01e-10	0.0216894	0.982157
ANKFN1	NM_153228	4.7772	-1.03292	NA	-0.608784	NA	1.31539	NA	0.891255	NA	0.398904	NA	0.995298	NA	1.96982	NA	1.37343	NA	-2.4797	0.0348509	1.43251	NA
ANKFY1	NM_016376	8211.85	0.199506	0.0110881	-0.0157827	0.93884	-0.107917	0.243036	0.107371	0.529456	0.252874	0.00032313	0.049052	0.746778	-0.120369	0.287857	0.0834536	0.735564	-0.0949712	0.163357	0.0537084	0.86788
ANKH	NM_054027	4689.46	0.12897	0.184657	-0.127462	0.184142	-0.0986357	0.291568	0.157796	0.10504	-0.0982034	0.359853	-0.0292055	0.870859	-0.0355452	0.903431	-0.104543	0.534498	-0.538229	5.14e-20	-0.226854	0.330801
ANKHD1	NM_024668	7108.08	0.0527377	0.676244	0.0322607	0.858752	-0.0684992	0.51169	-0.0480222	1	0.0015644	0.99424	0.0797174	0.503083	-0.0112757	0.97905	-0.0894288	0.661311	0.20006	0.00117191	-0.0508627	0.876059
ANKHD1-EIF4EBP3	NM_020690	27243	0.0960565	0.323922	0.0476558	0.744501	-0.0816294	0.353822	-0.0332286	1	0.0309688	0.83795	0.0907059	0.357784	-0.0250205	0.928726	-0.0847576	0.634131	0.0385368	0.566705	-0.0647541	0.81318
ANKIB1	NM_019004	12023.1	-0.016294	0.930183	0.11567	0.37793	0.114976	0.295523	-0.0169874	1	0.202643	0.0296393	0.08303	0.574116	-0.0796104	0.713825	0.0400021	0.999179	0.192954	0.00894513	0.219226	0.553502
ANKK1	NM_178510	24.5675	-0.264068	0.845732	-0.315636	NA	-0.0920318	0.953211	-0.0404636	1	-0.648954	0.427593	-0.853801	NA	-0.432698	NA	-0.227851	0.999179	2.53261	5.93e-07	-0.384777	0.897199
ANKLE1	NM_152363	3473	-0.0370785	0.810853	-0.124161	0.299079	-0.140756	0.157767	-0.0536727	1	-0.277728	0.00134649	-0.0709682	0.668397	-0.037006	0.920237	-0.243766	0.0135196	-1.64278	5.09e-133	-0.240321	0.452987
ANKLE2	NM_015114	13814.4	0.0540688	0.643094	-0.0491006	0.745395	-0.0739922	0.433746	0.0291772	1	-0.029144	0.855523	-0.0389548	0.790668	-0.0166928	0.963448	-0.006882	0.999179	0.0429249	0.535028	-0.0829052	0.765758
ANKMY1	NR_148697	1031.56	0.0189931	0.918823	-0.146202	0.219869	-0.258521	0.00344234	-0.0933261	0.839693	-0.145946	0.191956	-0.160815	0.147985	-0.0603852	0.82983	-0.0455167	0.994484	-0.00338632	0.975147	-0.164614	0.665775
ANKMY2	NM_020319	99.187	-0.376525	0.330078	-0.229072	0.657195	0.195848	0.631012	0.0483946	1	0.122969	0.878854	0.15768	0.833554	0.0139215	0.992857	-0.0207894	0.999179	-2.26661	1.49e-20	0.499798	0.692237
ANKRA2	NM_023039	1393.19	-0.033767	0.905282	-0.0306966	0.935585	-0.0159058	0.95804	-0.0189762	1	-0.059741	0.850479	-0.0707412	0.811145	-0.0108803	0.988111	0.000119951	1	0.478039	2.93e-05	-0.025708	0.973678
ANKRD1	NM_014391	1.71712	-0.688502	NA	-2.42851	NA	-0.806081	NA	0.933894	NA	1.71605	NA	0.133178	NA	-0.0226896	NA	1.56017	NA	0.429894	0.845139	2.40417	NA
ANKRD10	NM_001286721	4409.15	0.0744718	0.63456	0.00442264	0.988744	-0.0686049	0.630856	0.00144427	1	0.297253	0.00116003	0.102783	0.503083	-0.107279	0.59279	0.0871903	0.858507	-0.330292	2.05e-05	0.223144	0.580187
ANKRD11	NR_045839	5849.49	0.019963	0.888069	0.145893	0.0827508	0.0164444	0.904778	-0.109485	0.448589	-0.0056331	0.976847	0.0222877	0.900184	-0.0357851	0.894245	-0.0637058	0.873364	0.0899137	0.165551	-0.0252741	0.947542
ANKRD12	NM_015208	7040.18	-0.230283	0.470836	-0.0582782	0.919229	0.213275	0.459262	0.0412702	1	0.0893481	0.852813	0.0750307	0.883003	-0.0117969	0.989931	0.00252046	0.999686	-0.0627029	0.777916	0.319821	0.705652
ANKRD13A	NM_033121	17042.1	0.0524177	0.568315	0.148807	0.0134919	0.131652	0.0302104	0.0352623	1	0.0797755	0.321457	0.0770843	0.361689	0.0644672	0.605419	0.0671584	0.702054	-0.884449	1.41e-86	0.027658	0.924345
ANKRD13B	NM_152345	870.295	-0.0799587	0.733846	-0.266988	0.0953754	-0.20441	0.211348	-0.0173807	1	-0.318064	0.0479757	-0.0793192	0.792679	-0.0242261	0.977211	-0.262971	0.251182	-1.48432	8.69e-43	-0.237782	0.679225
ANKRD13C	NM_030816	5419.4	-0.0390901	0.791345	-0.0780882	0.599488	-0.0308378	0.830251	0.00816028	1	-0.0185854	0.928505	-0.0702401	0.632431	-0.085343	0.645175	-0.0336883	0.999179	0.0665955	0.394039	0.0207717	0.966235
ANKRD13D	NM_207354	5202.26	0.0201326	0.880046	0.040064	0.794985	-0.0246448	0.837575	-0.0445761	1	-0.0121877	0.947086	0.0415632	0.771758	0.0290378	0.917376	-0.0247131	0.999179	-0.488129	1.16e-19	-0.0320071	0.926694
ANKRD16	NM_001009941	991.647	0.0333203	0.844986	0.0350644	0.876665	-0.0218282	0.897094	-0.0235723	1	-0.0524398	0.784429	-0.0378074	0.864484	0.00365484	0.99305	-0.0109776	0.999179	-0.455117	6e-10	-0.0854828	0.817802
ANKRD17	NM_198889	27392.5	0.108466	0.289169	-0.0749686	0.555174	-0.193315	0.00876288	-0.00988043	1	0.0495209	0.723409	0.0212313	0.910322	-0.109766	0.345978	-0.0814759	0.730513	0.12943	0.0404501	-0.0586098	0.846423
ANKRD18A	NM_001331100	119.142	-0.294172	0.508315	-0.154927	0.816239	0.170951	0.705098	0.0317055	1	0.0420873	0.962425	0.276457	0.654713	0.034682	0.984307	-0.199688	0.987506	-2.10529	3.61e-17	0.336493	0.790524
ANKRD18B	NM_001353432	5.54335	0.415896	NA	0.377321	NA	-0.169072	NA	-0.130497	NA	0.151796	NA	-0.763717	NA	-1.31595	NA	-0.400447	NA	-1.22965	0.228133	-0.263906	NA
ANKRD18CP	NR_136286	10.6879	0.101342	NA	-0.0378773	NA	-0.0174283	NA	0.121791	1	1.05435	NA	1.28395	NA	-0.0910548	NA	-0.320656	0.999179	-1.16594	0.133767	0.953604	NA
ANKRD18DP	NR_003291	0.518374	-1.716	NA	-0.716706	NA	0	NA	-0.989662	NA	-3.77967	NA	-1.38768	NA	0	NA	-2.23387	NA	1.95577	NA	-2.06342	NA
ANKRD19P	NR_026868	5.07042	-1.33874	NA	-1.01411	NA	-0.935025	NA	-1.25965	NA	0.146256	NA	-0.495679	NA	-0.762264	NA	-0.120331	NA	0.897499	0.365605	1.48509	NA
ANKRD2	NM_001291218	1.49936	-2.46601	NA	0.0112243	NA	2.46766	NA	-0.00954018	NA	-1.12094	NA	-0.154885	NA	-0.581271	NA	-1.54732	NA	1.72269	0.296903	1.34578	NA
ANKRD20A1	NM_032250	0.536527	1.68217	NA	1.58657	NA	-1.73523	NA	-1.63963	NA	0.578936	NA	-0.17605	NA	-1.5211	NA	-0.766144	NA	-0.0323934	NA	-1.10199	NA
ANKRD20A11P	NR_027270	1.56312	-2.04705	NA	-1.04774	NA	0.971395	NA	-0.0278863	NA	-0.192463	NA	0.282581	NA	0.207812	NA	-0.267228	NA	1.24274	0.595521	1.85883	NA
ANKRD20A12P	NR_046228	0.697352	-1.59046	NA	-1.56874	NA	-0.967958	NA	-0.989672	NA	-1.01408	NA	-1.52707	NA	-0.357189	NA	0.155789	NA	0.657782	NA	0.577013	NA
ANKRD20A19P	NR_073430	0.896561	0	NA	0.936522	NA	0.971398	NA	-0.0278757	NA	-1.07016	NA	-2.90391	NA	1.20115	NA	3.03486	NA	3.65756	NA	-1.00699	NA
ANKRD20A2	NM_001012421	0.762266	-1.40547	NA	-2.17743	NA	-2.69205	NA	-1.92011	NA	1.736	NA	0.785705	NA	-1.71641	NA	-0.766145	NA	-4.07639	NA	3.1418	NA
ANKRD20A3	NM_001012419	0.762266	-1.40547	NA	-2.17743	NA	-2.69205	NA	-1.92011	NA	1.736	NA	0.785705	NA	-1.71641	NA	-0.766145	NA	-4.07639	NA	3.1418	NA
ANKRD20A4	NM_001098805	1.02849	0.407882	NA	1.60897	NA	1.11661	NA	-0.0844544	NA	0	NA	0.785712	NA	1.11979	NA	0.195646	NA	-2.30048	0.430339	-0.546039	NA
ANKRD20A4-ANKRD20A20P	NR_146419	1.63088	-1.24986	NA	0.719212	NA	1.89823	NA	-0.0708304	NA	-1.10023	NA	1.30514	NA	2.60026	NA	0.194936	NA	-2.66502	0.196113	0.150037	NA
ANKRD20A5P	NR_040113	178.345	0.102525	0.885161	0.118735	0.902471	-0.1927	0.743674	-0.208909	1	0.216202	0.610939	0.110981	0.841534	0.0403446	0.977272	0.145566	0.988021	3.23985	2.75e-40	0.113797	0.945305
ANKRD20A8P	NR_003366	0.824986	1.93131	NA	3.57669	NA	0.479802	NA	-1.16551	NA	-2.59268	NA	0.265497	NA	1.11975	NA	-1.7383	NA	2.42221	NA	-4.52471	NA
ANKRD20A9P	NR_138091	2.18054	-0.215171	NA	0.0018079	NA	0.207311	NA	-0.00966666	NA	0.604022	NA	1.26869	NA	-0.222509	NA	-0.88717	NA	1.78183	0.311557	0.819242	NA
ANKRD22	NM_144590	237.168	0.507349	0.244203	0.167917	0.82665	0.450738	0.205934	0.790169	0.0186258	1.44454	9.52e-13	0.0116885	0.987866	-0.0502932	0.966534	1.38256	1.57e-11	2.40102	1.53e-25	0.937495	0.238651
ANKRD23	NM_144994	688.398	0.0233572	0.936336	0.170776	0.410055	0.055404	0.810388	-0.092015	1	0.0972516	0.692016	0.175337	0.359457	0.00772681	0.989359	-0.0703582	0.99388	0.15023	0.224177	0.0741907	0.906386
ANKRD24	NM_133475	236.388	-0.0620286	0.918023	-0.0412905	0.957144	-0.0850358	0.872781	-0.105774	1	-0.171302	0.747858	-0.206545	0.683179	-0.160152	0.860226	-0.12491	0.999179	1.35932	1e-09	-0.109009	0.939956
ANKRD26	NM_014915	3566.55	-0.248925	0.333412	0.0115684	0.983657	0.190153	0.42903	-0.0703405	1	0.0389086	0.932081	0.0922451	0.808942	0.00278317	0.998752	-0.0505533	0.999179	-0.11042	0.5316	0.288065	0.695068
ANKRD26P1	NR_026556	18.9083	0.654601	0.404467	0.618561	NA	-0.481728	NA	-0.445688	0.936137	-0.452907	0.566631	0.00774257	NA	0.200081	NA	-0.260568	0.989185	1.0178	0.022915	-1.1072	0.61957
ANKRD26P3	NR_027248	559.571	-0.0482995	0.864241	0.442431	0.00193791	0.423505	0.00290348	-0.0672258	1	0.217341	0.342258	0.432168	0.0112292	0.0734339	0.906963	-0.141393	0.873779	-1.50149	6.44e-35	0.26599	0.675181
ANKRD27	NM_032139	8085.21	0.00920127	0.939705	-0.100744	0.146976	-0.137978	0.0165273	-0.028033	1	-0.0891979	0.202703	-0.0367258	0.73832	-0.0431219	0.780702	-0.0955941	0.294841	0.147779	0.00138101	-0.098107	0.673243
ANKRD28	NR_146111	5058.22	-0.0447456	0.737851	0.0438718	0.802413	-0.00233676	0.988979	-0.0909541	0.720931	-0.0477303	0.745542	0.097342	0.367659	-0.00499626	0.988876	-0.150069	0.140715	0.647038	4.78e-28	-0.0026632	0.997328
ANKRD29	NM_173505	56.2945	-0.279533	0.602484	-0.0494788	0.95543	0.0220923	0.975832	-0.207962	1	0.0233717	0.981817	-0.347646	NA	-0.82808	NA	-0.457062	0.699338	-0.879262	0.00231424	0.303186	0.826689
ANKRD30A	NM_052997	0.475505	-3.21901	NA	-3.1815	NA	0.971362	NA	0.933857	NA	2.153	NA	1.68222	NA	-1.1716	NA	-0.700842	NA	-3.18807	NA	5.37203	NA
ANKRD30B	NM_001367607	1.19971	-1.87703	NA	-0.441016	NA	0.8664	NA	-0.569588	NA	4.36289	NA	3.27158	NA	-2.51983	NA	-1.42853	NA	-2.81659	0.191288	6.24041	NA
ANKRD30BL	NR_152415	0.639479	-0.18346	NA	-1.12295	NA	0.615155	NA	1.5546	NA	0	NA	0	NA	0	NA	0	NA	-2.88009	NA	0.0464434	NA
ANKRD30BP2	NR_026916	0.232277	0	NA	0.936425	NA	0	NA	-0.989615	NA	-0.983539	NA	-1.98294	NA	0.959297	NA	1.95854	NA	1.18878	NA	-0.919439	NA
ANKRD30BP3	NR_033891	0.294146	0	NA	0	NA	0.971294	NA	0.933793	NA	-0.609963	NA	-1.66975	NA	-1.82577	NA	-0.766132	NA	2.42376	NA	-0.547789	NA
ANKRD31	NM_001164443	14.7519	-0.363527	NA	-0.0833333	NA	0.21257	NA	-0.0676236	1	-0.296167	NA	-0.0570452	NA	0.186706	NA	-0.052416	0.999179	0.193727	0.759704	0.0676069	0.987053
ANKRD33	NM_001304459	0.182877	0	NA	0	NA	0.971319	NA	0.933818	NA	-0.138356	NA	-1.13776	NA	0.158073	NA	1.15732	NA	0.929371	NA	-0.0752596	NA
ANKRD33B	NM_001164440	36626	0.038328	0.882003	0.0853155	0.771047	0.140072	0.426535	0.0930847	0.995721	0.0184569	0.95863	-0.0299875	0.931964	-0.0354927	0.953643	0.0129517	0.999179	0.123615	0.316822	-0.0195894	0.97891
ANKRD34A	NM_001039888	903.586	-0.429886	0.00710759	-0.335792	0.0570508	-0.315111	0.0740253	-0.409205	0.01983	-0.105343	0.709718	-0.033561	0.933391	-0.175996	0.564149	-0.247778	0.340212	0.747559	6.05e-10	0.324802	0.623755
ANKRD34B	NM_001004441	9.06212	-1.07454	NA	0.818629	NA	1.19865	NA	-0.69452	0.980221	-1.03055	NA	-0.168745	NA	3.56304	NA	2.70126	0.374466	-4.51061	0.000768231	0.0439286	NA
ANKRD34C	NM_001146341	0.40025	0.924088	NA	0	NA	-0.977259	NA	0	NA	2.31701	NA	1.68223	NA	0.468005	NA	1.10275	NA	-0.0322966	NA	1.3935	NA
ANKRD34C-AS1	NR_038997	0.163904	0	NA	0	NA	0	NA	0	NA	-2.94345	NA	-2.98107	NA	0	NA	0	NA	2.77209	NA	-2.87955	NA
ANKRD35	NM_001280799	22.3804	0.0529575	0.961717	-0.140959	NA	-0.292214	0.711886	-0.0982967	1	0.283378	0.803023	0.010971	NA	0.076818	NA	0.349225	0.973482	-0.755626	0.108072	0.230885	0.931034
ANKRD36	NM_001354587	604.257	-0.144316	0.609096	0.0315232	0.945541	0.148956	0.551125	-0.0268826	1	0.0855456	0.820253	0.039056	0.933446	-0.00158587	0.999573	0.0449037	0.999179	-0.204535	0.198717	0.230159	0.7388
ANKRD36B	NM_001353337	122.331	-0.0237507	0.967254	0.0392265	0.953617	-0.141717	0.724058	-0.204694	0.95392	-0.039091	0.953996	-0.0553423	0.934694	-0.179045	0.813068	-0.162794	0.975305	-0.0144427	0.96038	-0.0150009	0.993936
ANKRD36BP1	NR_026844	11.6792	0.371518	NA	0.630079	NA	0.337969	NA	0.0794082	1	0.845414	NA	0.821466	NA	-0.312674	NA	-0.288725	0.994846	-0.115955	0.874045	0.474293	0.859067
ANKRD36BP2	NR_015424	156.549	-0.183075	0.737851	0.0487492	0.953441	0.242013	0.599731	0.0101886	1	0.181597	0.772567	0.446037	0.30197	0.148077	0.900639	-0.116363	0.999179	-0.190476	0.535001	0.365018	0.765905
ANKRD36C	NM_001310154	473.072	-0.0448053	0.91412	0.0498383	0.927111	-0.0268081	0.949863	-0.121452	1	0.337262	0.170325	0.23106	0.45168	-0.233074	0.563834	-0.126872	0.97719	0.00857151	0.971938	0.382412	0.660423
ANKRD37	NM_181726	1875.41	-0.295956	0.396433	-0.957484	9.72e-06	-0.735292	0.00134007	-0.0737644	1	0.0812198	0.887015	-0.393455	0.203564	-0.372229	0.306222	0.102445	0.999179	0.0489708	0.846746	0.377516	0.695068
ANKRD39	NM_016466	2254.02	0.0547743	0.74892	0.100112	0.551944	0.045242	0.77848	-9.57e-05	1	0.0125163	0.96155	0.0674773	0.727855	0.0255485	0.956983	-0.0294124	0.999179	-0.484862	5.27e-10	-0.0419329	0.933448
ANKRD40	NM_052855	5250.49	0.0678548	0.481422	-0.0904366	0.324359	-0.0717413	0.387687	0.0865501	0.582179	0.0163415	0.918877	-0.0278056	0.848321	-0.0014427	0.997313	0.0427044	0.969881	-0.307712	1.52e-09	-0.0512162	0.847286
ANKRD40CL	NM_001358683	0.110494	0	NA	0	NA	0.971336	NA	0.933835	NA	-0.138339	NA	-1.13774	NA	-0.803689	NA	0	NA	0.929406	NA	-0.075329	NA
ANKRD42	NM_001300972	520.322	-0.0511745	0.830352	-0.203346	0.24523	-0.0905259	0.640195	0.0616452	1	-0.0920743	0.680958	-0.0210435	0.954126	-0.0398945	0.938472	-0.110925	0.865023	0.381265	0.000205829	-0.0406046	0.952482
ANKRD44	NM_001195144	11749.2	-0.0420141	0.722305	0.270549	1.08e-05	0.311183	1.79e-07	-0.00138032	1	0.0861728	0.371288	0.250035	8.52e-05	0.142974	0.0883852	-0.0208881	0.999179	0.0432833	0.513448	0.128501	0.660423
ANKRD44-IT1	NR_046837	16.6986	-0.970965	0.311748	-0.0215254	NA	1.24099	NA	0.291555	1	0.489457	0.671744	0.543018	NA	-0.174783	NA	-0.228345	0.999179	-0.432957	0.490822	1.4606	0.610018
ANKRD45	NM_198493	2.75138	-0.44649	NA	0.395471	NA	0.228508	NA	-0.613446	NA	0.0773193	NA	-1.05104	NA	-0.117255	NA	1.0111	NA	0.719213	0.667611	0.523448	NA
ANKRD46	NM_001270377	1363.64	-0.0957242	0.618462	-0.11568	0.581364	-0.0434552	0.834643	-0.0234992	1	-0.0267597	0.926529	-0.114776	0.554982	-0.0909223	0.778664	-0.00290634	0.999179	0.270072	0.00614123	0.0692156	0.89895
ANKRD49	NM_017704	2111.16	-0.212662	0.437872	-0.0456149	0.927067	0.244233	0.291226	0.0771864	1	-0.000811667	0.999092	-0.0712899	0.869902	-0.0725155	0.922941	-0.00203724	0.999686	0.0199116	0.92108	0.212023	0.769454
ANKRD50	NM_020337	1009.12	-0.197535	0.509502	-0.0565397	0.913325	0.0856066	0.794375	-0.0553886	1	0.0734529	0.867609	0.162042	0.635606	0.0156579	0.987302	-0.0729312	0.999179	0.553762	0.000470182	0.271196	0.719138
ANKRD52	NM_173595	23486.8	0.0829954	0.686602	0.106856	0.63723	-0.040863	0.8505	-0.0647233	1	0.0702755	0.773661	0.151776	0.39628	0.0282542	0.963749	-0.0532459	0.999179	0.0130599	0.921142	-0.0123778	0.987886
ANKRD53	NM_024933	11.0384	0.337144	NA	0.0474742	NA	-0.19094	NA	0.0987295	1	-1.29872	NA	-0.540661	NA	0.351839	NA	-0.406218	0.996976	1.03254	0.182978	-1.63544	NA
ANKRD54	NM_138797	3239.1	0.0336249	0.755314	-0.0818462	0.374354	-0.127885	0.0555315	-0.0124142	1	-0.18274	0.002525	-0.0589114	0.573676	0.019305	0.942825	-0.104524	0.320059	-0.177285	0.000466314	-0.216039	0.1646
ANKRD55	NM_024669	0.511317	0	NA	0	NA	0.971358	NA	0.933854	NA	0.505917	NA	-1.64926	NA	-0.553559	NA	1.6015	NA	2.40285	NA	0.569071	NA
ANKRD6	NM_001242809	272.838	-0.204953	0.605234	0.110197	0.850192	0.253663	0.439787	-0.0614875	1	-0.0550914	0.924797	0.186113	0.665781	0.114973	0.896251	-0.126231	0.992507	0.597552	0.00276241	0.150118	0.891691
ANKRD60	NM_001304369	0.124955	0	NA	0	NA	0	NA	0	NA	-0.138339	NA	-1.13774	NA	0.15809	NA	1.15733	NA	0.929319	NA	-0.0751556	NA
ANKRD61	NM_001271700	28.7771	0.29834	0.694828	-0.371049	NA	-0.563943	0.325646	0.105446	1	0.0611642	0.961909	-0.112051	NA	-0.184343	NA	-0.0111283	0.999179	-0.70807	0.0913489	-0.236766	0.918734
ANKRD62	NM_001277333	1.32014	2.09085	NA	1.78686	NA	0.339985	NA	0.643974	NA	0.823339	NA	3.5035	NA	3.15063	NA	0.470524	NA	-0.994126	0.735025	-1.26724	NA
ANKRD62P1-PARP4P3	NR_040115	0.0468077	0	NA	0	NA	0.971371	NA	0.93387	NA	0	NA	0	NA	0	NA	0	NA	-0.0323214	NA	-0.0753984	NA
ANKRD63	NM_001190479	0.205665	-1.02447	NA	-0.986967	NA	0.971302	NA	0.933802	NA	0	NA	1.6822	NA	1.11968	NA	-0.700756	NA	-0.993811	NA	0.885954	NA
ANKRD65	NM_001243535	110.069	0.0573187	0.939705	0.37642	0.507818	0.531489	0.181455	0.212387	1	-0.203335	0.715811	0.0886849	0.902802	0.621681	0.0805428	0.329661	0.704237	1.70277	2.68e-11	-0.260419	0.845324
ANKRD66	NM_001162435	0.0753383	0	NA	0	NA	0	NA	0	NA	0	NA	1.68225	NA	0	NA	-1.66248	NA	-0.0322394	NA	-0.0754954	NA
ANKRD7	NM_019644	20.1572	-0.490753	0.537468	0.117401	NA	0.753698	NA	0.145544	1	-0.18492	0.898586	-0.751893	NA	-0.33469	NA	0.232283	0.999179	-1.17093	0.0105702	0.306009	0.905298
ANKRD9	NM_001348651	1269.96	0.00312741	0.991558	0.0533718	0.873608	0.0169414	0.952848	-0.0333029	1	-0.20535	0.276254	0.0151897	0.973184	0.170122	0.544085	-0.0504175	0.999179	-1.14265	2.03e-26	-0.208202	0.705916
ANKS1A	NM_015245	2047.01	0.0140088	0.946069	-0.118754	0.434493	-0.156738	0.170889	-0.0239748	1	0.0292178	0.901333	0.0201278	0.937145	-0.0101545	0.98387	-0.00106446	0.999686	0.232501	0.00375285	0.0155371	0.976865
ANKS1B	NM_001352216	3.44142	-0.843086	NA	-0.434469	NA	0.549008	NA	0.140394	NA	-0.843275	NA	-0.0992765	NA	1.16519	NA	0.421194	NA	0.563579	0.679922	8.33e-05	NA
ANKS3	NM_001324129	1056.34	0.0109626	0.953098	0.0218952	0.926211	0.00988822	0.957127	-0.00104441	1	-0.118417	0.318032	0.0888425	0.523966	0.177966	0.101369	-0.0292939	0.999179	0.0533402	0.53047	-0.129099	0.707743
ANKS4B	NM_145865	2.14866	-0.434222	NA	-1.93437	NA	-1.08794	NA	0.412199	NA	1.60356	NA	1.07923	NA	-3.80735	NA	-3.28301	NA	-0.687472	0.68067	2.03762	NA
ANKS6	NM_173551	764.36	-0.0125731	0.962192	-0.14616	0.437491	-0.133278	0.396608	0.000308939	1	-0.120131	0.686854	-0.0342809	0.936476	-0.0454148	0.951423	-0.131265	0.914896	-3.0084	1.31e-167	-0.107197	0.858311
ANKUB1	NM_001315506	0.169459	0	NA	0	NA	0.971319	NA	0.933818	NA	0.823267	NA	0	NA	1.11562	NA	2.11486	NA	-0.0323213	NA	0.886398	NA
ANKZF1	NM_018089	5615.24	-0.064263	0.830573	0.077357	0.839615	0.0451565	0.878833	-0.0964635	1	0.0627712	0.865546	0.078144	0.820976	0.0313588	0.968827	0.0159859	0.999179	0.247158	0.0823582	0.127387	0.85001
ANLN	NM_018685	5066.21	-0.118734	0.41691	0.0630795	0.774684	0.0795167	0.581355	-0.102296	0.834481	0.0988372	0.534019	0.238819	0.0295891	-0.00133037	0.999242	-0.141312	0.503316	-0.590076	4.72e-14	0.217866	0.61491
ANO1	NM_018043	10.0038	-0.557952	NA	0.409486	NA	0.460674	NA	-0.506762	1	-0.152047	NA	0.657775	NA	0.76558	NA	-0.0442412	0.999179	0.898285	0.252933	0.406016	NA
ANO10	NM_001204834	538.523	-0.0587971	0.846754	0.0531395	0.900927	0.129833	0.579118	0.0178967	1	0.0116801	0.980401	0.162889	0.562452	0.106933	0.838693	-0.0442767	0.999179	-0.774565	3.82e-09	0.0707328	0.933221
ANO2	NM_001364791	1.18742	0.102508	NA	0.594383	NA	0.797279	NA	0.305409	NA	1.38074	NA	-2.04484	NA	-0.435504	NA	2.99002	NA	-0.648023	0.792692	1.27812	NA
ANO3	NM_001313727	23.873	-0.386269	0.65427	-0.516081	NA	0.12016	0.904507	0.249971	1	-0.727603	0.425514	-0.457813	NA	0.00200421	NA	-0.267785	0.999179	-1.33342	0.00384243	-0.34103	0.897199
ANO3-AS1	NR_132968	0.0813888	-1.02442	NA	-0.986916	NA	0	NA	0	NA	0.823302	NA	0	NA	-0.803671	NA	0	NA	-0.993893	NA	1.84785	NA
ANO4	NM_001286616	1.82569	1.28578	NA	0.76283	NA	-0.782694	NA	-0.259753	NA	-2.35185	NA	-0.482613	NA	2.8874	NA	1.01819	NA	0.321653	0.872405	-3.63658	NA
ANO5	NM_001142649	1340.17	-0.0794295	0.844998	0.0967732	0.851678	0.275726	0.311211	0.0995229	1	0.302627	0.304074	0.234453	0.498557	-0.0114857	0.99057	0.0566881	0.999179	-0.679252	0.000122434	0.382324	0.673243
ANO6	NM_001025356	8695.72	-0.0510899	0.646685	-0.0688531	0.556261	-0.113345	0.15102	-0.0955818	0.533971	-0.0126208	0.943202	0.0259001	0.870714	-0.053389	0.774379	-0.0919098	0.538147	0.0254854	0.711939	0.0387525	0.900404
ANO7	NM_001370694	176.373	-0.0995036	0.805027	0.0641397	0.913325	0.145425	0.664895	-0.0182182	1	-0.0454918	0.937715	-0.17595	0.678967	-0.233058	0.662517	-0.1026	0.999179	-0.329402	0.0976006	0.0542355	0.966235
ANO8	NM_020959	826.225	-0.186364	0.43959	0.00622449	0.990549	-0.156163	0.486618	-0.348752	0.0951384	-0.156672	0.549708	0.0190609	0.970323	-0.00647448	0.99305	-0.182207	0.724805	-0.065773	0.689828	0.0299559	0.973576
ANO9	NM_001012302	2821.22	0.242201	0.281146	0.0784685	0.836309	-0.214149	0.29	-0.0504167	1	0.107696	0.728319	0.14041	0.623827	0.0181717	0.983772	-0.014542	0.999179	0.0811014	0.61473	-0.134174	0.838535
ANOS1	NM_000216	2.43373	3.01203	NA	3.27892	NA	-0.369385	NA	-0.636271	NA	0.39779	NA	-0.52477	NA	-2.54054	NA	-1.61799	NA	3.03525	0.0795029	-2.61384	NA
ANP32A	NM_006305	32091	-0.0444509	0.727488	0.0443358	0.787161	0.0301969	0.809644	-0.0585898	0.957481	-0.0327849	0.841232	0.0205103	0.913885	-0.0154118	0.966534	-0.068707	0.84399	-0.268715	5.41e-06	0.0119997	0.976606
ANP32A-IT1	NR_026808	54.7879	0.0282572	0.973359	-0.148107	0.870711	-0.0502587	0.947641	0.126106	1	0.701107	0.0904723	0.0988137	NA	-0.607333	NA	-0.00503953	0.999686	-0.219057	0.54894	0.673265	0.664467
ANP32AP1	NR_003144	79.515	-0.017102	0.981794	0.224587	0.736281	0.305484	0.478944	0.0637949	1	-0.0605702	0.942127	-0.119383	0.876922	-0.124726	0.923981	-0.0659136	0.999179	-0.0453558	0.89631	-0.043274	0.982524
ANP32B	NM_006401	47028.7	-0.0649058	0.647627	-0.00416979	0.988302	0.0274259	0.858146	-0.0333101	1	-0.0331646	0.86741	-0.000831506	0.997674	-0.0308364	0.929192	-0.0631695	0.945095	-0.468045	5.23e-12	0.0320437	0.943541
ANP32C	NM_012403	133.774	-0.357799	0.427784	0.149969	0.82952	0.363501	0.351372	-0.144267	1	-0.253226	0.62826	-0.00654575	0.993997	0.0622832	0.966661	-0.184397	0.983954	-0.103092	0.740876	0.104773	0.948677
ANP32D	NM_012404	0.120081	0	NA	0.936469	NA	0.971336	NA	-0.0277879	NA	0	NA	0	NA	1.11971	NA	1.15733	NA	-0.0324602	NA	-0.0751729	NA
ANP32E	NM_030920	21037.9	-0.180755	0.572561	0.0754852	0.881641	0.257258	0.311647	0.00101756	1	0.133492	0.730718	0.158188	0.671735	-0.0229996	0.983772	-0.0476962	0.999179	-0.15862	0.407682	0.314509	0.696344
ANPEP	NM_001150	17.9062	0.0885276	0.948169	0.425205	NA	-0.145116	NA	-0.481794	0.976684	-0.0508229	0.975481	-0.112529	NA	-0.0842306	NA	-0.0225243	0.999179	0.339153	0.592507	-0.138938	0.969287
ANTKMT	NM_023933	3176.7	0.109373	0.667995	0.0280229	0.94525	-0.103554	0.654065	-0.0222031	1	0.0271698	0.94635	0.0493774	0.894194	0.0252109	0.976589	0.00300338	0.999373	0.03159	0.845944	-0.0818236	0.910884
ANTXR1	NM_032208	2.78747	-1.60114	NA	-1.83542	NA	0.110683	NA	0.344955	NA	0.599975	NA	0.108908	NA	-0.604112	NA	-0.113046	NA	-0.119911	0.933977	2.2011	NA
ANTXR2	NM_001145794	461.62	-0.318964	0.169169	0.400344	0.0384572	0.575736	0.000635055	-0.143572	0.945919	-0.0350115	0.935864	0.20991	0.401827	0.287751	0.234532	0.04283	0.999179	0.546259	0.000126914	0.284247	0.690323
ANTXRL	NM_001354208	0.0525517	-1.02441	NA	-0.986899	NA	0	NA	0	NA	0	NA	0	NA	0	NA	0	NA	-0.993962	NA	0.88619	NA
ANTXRLP1	NR_103827	37.3333	0.12029	0.931379	0.743878	0.448274	0.575639	0.49012	-0.0479488	1	-0.0949878	0.92482	-0.146983	NA	-0.287928	NA	-0.235933	0.989185	3.2005	2.51e-13	-0.215083	0.938603
ANXA1	NM_000700	172.625	0.0746955	0.913788	-0.0239472	0.98192	0.218812	0.664753	0.317455	0.884893	0.0392361	0.962425	-0.0101381	0.991302	0.152028	0.900639	0.201402	0.978358	0.942121	0.000495092	-0.0350963	0.987269
ANXA10	NM_007193	0.29361	0	NA	0.936469	NA	0	NA	-0.989639	NA	-0.138404	NA	-0.176029	NA	1.74427	NA	1.78189	NA	0.929325	NA	-0.0751338	NA
ANXA11	NM_001278408	17464.7	0.0689919	0.577451	0.0539616	0.744869	-0.0106613	0.947641	0.00436899	1	-0.0455429	0.770299	-0.00607355	0.979878	0.0739644	0.693035	0.0344951	0.999179	-0.113868	0.0975231	-0.114214	0.710515
ANXA13	NM_004306	0.255267	-1.02449	NA	-0.986983	NA	0	NA	0	NA	2.56843	NA	0.785611	NA	-1.58688	NA	0.19566	NA	-0.993732	NA	3.5922	NA
ANXA2	NM_004039	16597.3	-0.0316957	0.852646	0.172166	0.110756	0.177909	0.0733119	-0.0259528	1	-0.0508655	0.781559	0.0886155	0.557629	0.144544	0.285327	0.00506273	0.999179	-0.61959	1.52e-18	-0.0188467	0.970958
ANXA2P1	NR_001562	20.0167	-0.329378	0.76628	0.0395411	NA	0.57021	NA	0.201291	1	0.218176	0.890342	0.130347	NA	0.0757134	NA	0.163542	0.999179	-0.802743	0.164652	0.547768	0.829419
ANXA2P2	NR_003573	613.545	-0.115806	0.504439	0.0212612	0.943751	0.170192	0.211155	0.0331245	1	-0.0317857	0.916198	0.10648	0.613834	0.0881112	0.802014	-0.0501549	0.999179	-0.775606	3.28e-17	0.0843944	0.866158
ANXA2P3	NR_001446	4.62708	-1.28958	NA	0.299762	NA	1.68807	NA	0.0987376	NA	-0.152247	NA	-0.538023	NA	0.00137126	NA	0.387145	NA	-0.334935	0.784156	1.13722	NA
ANXA2R	NM_001014279	768.492	0.898116	1.32e-13	0.955082	1.12e-14	0.867944	4.66e-13	0.810978	6.09e-12	1.25471	6.32e-22	0.915222	7.59e-11	0.389161	0.0184503	0.728652	2.82e-08	-1.34271	2.69e-26	0.356923	0.590579
ANXA3	NM_005139	12.5119	1.11672	NA	0.673503	NA	-0.561789	NA	-0.118571	1	0.487699	NA	0.20811	NA	0.672234	NA	0.951822	0.326715	0.535479	0.418618	-0.628624	0.804124
ANXA4	NM_001153	5664.07	-0.0409729	0.711097	0.0186499	0.913227	0.110908	0.130943	0.0512852	0.955675	5.1e-05	0.999899	0.0561817	0.605307	0.0591189	0.695206	0.00298812	0.999179	0.429333	3.96e-18	0.0413409	0.883881
ANXA5	NM_001154	14060.8	-0.0688997	0.338346	0.042786	0.655622	0.0938013	0.0980375	-0.0178844	1	-0.0609588	0.414035	-0.00131687	0.992681	0.0718602	0.397437	0.0122183	0.999179	-0.572289	1.91e-48	0.00824141	0.976667
ANXA6	NM_001155	117283	-0.0249824	0.87434	0.131633	0.218397	0.095672	0.359608	-0.0609434	0.976684	-0.0422908	0.80496	0.123873	0.25779	0.101501	0.510554	-0.0646631	0.91818	-0.101368	0.164999	-0.0169617	0.970958
ANXA7	NM_001156	19558.7	0.0993991	0.241125	0.0658023	0.534635	0.0195892	0.860381	0.053186	0.934423	0.0878381	0.294604	0.0159763	0.922138	0.00581131	0.985616	0.0776731	0.629251	0.0357233	0.559075	-0.0112321	0.974175
ANXA8	NM_001040084	8.13489	1.63735	NA	3.12019	NA	-0.728717	NA	-2.21154	NA	-0.609408	NA	-0.221359	NA	0.543255	NA	0.155207	NA	6.55357	2.27e-05	-2.24698	NA
ANXA8L1	NM_001098845	4.42273	2.20172	NA	0	NA	-1.29306	NA	0.933894	NA	0.975771	NA	0.625276	NA	0.195785	NA	0.546279	NA	4.72486	0.00263728	-1.2266	NA
ANXA9	NM_003568	10.4764	-0.56212	NA	0.163477	NA	0.366514	NA	-0.359082	1	0.288163	NA	0.183141	NA	-0.170926	NA	-0.0659035	0.999179	-0.593749	0.400582	0.850282	NA
AOAH	NM_001637	52.3438	-0.0221401	0.98286	0.0428159	0.972534	0.0497783	0.959082	-0.0151777	1	-0.207349	0.791622	-0.173053	NA	0.0824111	NA	0.0481151	0.999179	1.62115	1.49e-06	-0.184708	0.932116
AOAH-IT1	NR_046764	0.229747	-0.0782124	NA	-0.986978	NA	-0.936609	NA	0	NA	-2.55102	NA	-2.58864	NA	1.11967	NA	1.15729	NA	1.41824	NA	-2.47222	NA
AOC1	NM_001091	1.38357	-1.5099	NA	-1.46546	NA	0.0165561	NA	-0.0278835	NA	-0.0329521	NA	-0.172902	NA	0.771392	NA	0.911341	NA	1.00569	0.624529	1.47731	NA
AOC2	NM_009590	226.847	0.161417	0.56662	-0.0229602	0.962831	-0.199693	0.3867	-0.0153166	1	0.024505	0.959964	-0.269023	0.290309	-0.29839	0.280215	-0.00486223	0.999179	-0.238147	0.142778	-0.136676	0.854963
AOC3	NM_001277732	64.2395	0.0388581	0.957258	-0.131354	0.877355	0.0802273	0.897587	0.250439	0.98149	-0.132784	0.86201	-0.556268	0.214612	-0.373408	0.618734	0.0500755	0.999179	0.0606564	0.866575	-0.171472	0.918052
AOC4P	NR_002773	4.02008	-0.0869362	NA	-0.133388	NA	-0.648817	NA	-0.602366	NA	0.824287	NA	0.686001	NA	-0.596198	NA	-0.457913	NA	-0.17687	0.909133	0.911687	NA
AOPEP	NM_001193329	644.568	0.154813	0.366932	0.104528	0.640076	0.0755781	0.671928	0.125863	0.804577	-0.099606	0.593273	-0.0220857	0.942315	0.115951	0.643905	0.0384312	0.999179	0.650293	1.12e-12	-0.254112	0.611775
AOX1	NM_001159	10.0804	-0.308043	NA	-0.361434	NA	0.451435	NA	0.504825	1	-0.401832	NA	-0.14444	NA	0.203441	NA	-0.053951	0.999179	1.068	0.10249	-0.0936548	NA
AOX3P-AOX2P	NR_135012	0.482893	-1.21547	NA	-0.0281359	NA	0.0243379	NA	-1.1629	NA	2.4809	NA	0	NA	-0.707014	NA	1.94981	NA	-2.13142	NA	3.69633	NA
AP1AR	NM_018569	2108.83	-0.111172	0.497641	-0.0695918	0.769071	0.0147508	0.947641	-0.0268299	1	-0.00953671	0.97287	0.0160545	0.959485	-0.0265655	0.959948	-0.0521568	0.995306	-0.00536192	0.965965	0.101898	0.812592
AP1B1	NM_001127	40969.2	0.0998412	0.643931	-0.00330073	0.993884	-0.106423	0.576742	-0.00328069	1	0.0831111	0.747495	0.0491097	0.875939	-0.035662	0.952712	-0.00166067	0.999686	-0.29649	0.00708157	-0.0163571	0.984514
AP1B1P1	NR_040114	0.55749	2.97941	NA	0	NA	-3.03245	NA	0	NA	-1.2316	NA	-3.62764	NA	-2.20029	NA	0	NA	3.41905	NA	-4.2098	NA
AP1G1	NM_001128	16031.5	-0.0502675	0.682616	-0.0162516	0.933146	-0.0302081	0.807083	-0.064224	0.925425	-0.000883902	0.997154	-0.0105721	0.96106	-0.0891547	0.524017	-0.0794665	0.745228	-0.00800514	0.919491	0.0496511	0.875977
AP1G2	NM_003917	10437.1	0.180101	0.28731	0.0737171	0.787106	-0.0852825	0.639329	0.0211016	1	0.153998	0.373328	0.123284	0.539458	-0.000282274	0.999742	0.0304314	0.999179	-0.140716	0.203487	-0.0257241	0.970542
AP1M1	NM_032493	12283	-0.0130035	0.890143	0.011825	0.927601	0.00984284	0.916555	-0.0149856	1	-0.0867131	0.134897	-0.00330838	0.981299	0.0970231	0.118125	0.0136184	0.999179	-0.255972	1.99e-11	-0.0734063	0.70217
AP1M2	NM_001300887	1.98391	0.750263	NA	-0.987054	NA	1.49808	NA	3.23536	NA	-1.78951	NA	-0.814575	NA	1.65643	NA	0.681497	NA	3.67631	0.0664439	-2.53942	NA
AP1S1	NM_001283	5848.9	-0.0650373	0.409531	-0.0246672	0.848802	0.0197053	0.834426	-0.0206647	1	-0.0597044	0.461522	0.0484427	0.603243	0.0628151	0.564149	-0.045332	0.890405	-0.167906	0.000123662	0.00565944	0.98745
AP1S2	NM_003916	7332.59	-0.230197	0.208893	0.164765	0.448893	0.328135	0.022173	-0.066826	1	0.068334	0.817662	0.125552	0.599261	-0.0163963	0.983361	-0.0736148	0.99388	-0.270377	0.0219916	0.298795	0.620863
AP1S3	NM_001039569	4537.68	0.148128	0.040166	0.0271109	0.862784	0.0568693	0.52623	0.177886	0.0084134	0.0383251	0.750712	0.041218	0.732762	0.0691249	0.585877	0.066232	0.751175	0.944746	6.42e-85	-0.109517	0.673243
AP2A1	NM_130787	27101.9	0.0933518	0.399693	0.0390089	0.825391	-0.0645262	0.552211	-0.0101832	1	-0.0139499	0.943598	0.0230053	0.903481	0.0504711	0.82983	0.013516	0.999179	0.17776	0.0048826	-0.106997	0.719138
AP2A2	NM_001242837	10319.7	0.0557261	0.641688	0.0321842	0.853693	-0.025112	0.845135	-0.00157013	1	-0.0232642	0.895744	0.0612287	0.638921	0.0446807	0.848447	-0.0398122	0.989185	-0.0413626	0.561486	-0.0786687	0.782565
AP2B1	NM_001030006	27075.5	0.0551886	0.440758	0.082711	0.179001	0.00823729	0.932001	-0.0192851	1	0.0124218	0.917582	0.076127	0.232239	0.0334873	0.815197	-0.0302179	0.979985	0.176336	5.62e-06	-0.0424709	0.825769
AP2M1	NM_004068	31786.2	0.0648592	0.643931	0.0726235	0.655073	-0.0148529	0.93032	-0.0226171	1	0.0105302	0.96219	0.0615182	0.704965	0.0345618	0.920237	-0.0164262	0.999179	-0.074492	0.35207	-0.0539863	0.889016
AP2S1	NM_004069	7609.84	0.0465834	0.768613	0.0912915	0.548666	0.0381609	0.798634	-0.0065472	1	0.0399021	0.838886	0.0639209	0.704805	0.0497738	0.870999	0.025755	0.999179	-0.00664464	0.946923	-0.00633974	0.992833
AP3B1	NM_003664	11949.8	-0.0919125	0.473945	0.0177978	0.938673	0.0976179	0.377742	-0.0120923	1	0.0534787	0.749287	0.070924	0.644	-0.00124822	0.998806	-0.0186935	0.999179	0.206021	0.00371863	0.145656	0.675181
AP3B2	NM_004644	36.0273	0.323558	0.697255	0.269776	0.810573	0.206611	0.796953	0.260393	1	0.282187	0.816586	-0.267813	NA	-0.466846	NA	0.0831528	0.999179	-1.52368	0.000606506	-0.0410252	0.991947
AP3D1	NM_001261826	47855.4	0.119528	0.0978094	-0.0532434	0.6314	-0.116193	0.0800366	0.0565776	0.888295	0.0065624	0.966243	-0.0194983	0.893958	0.0320083	0.879643	0.058069	0.822015	0.346219	1.47e-13	-0.112666	0.660423
AP3M1	NM_207012	16599.8	-0.0206787	0.820222	-0.00310298	0.983848	0.0344399	0.63907	0.0168641	1	0.0132406	0.913096	0.0208749	0.849475	-0.017889	0.928726	-0.0255233	0.99388	0.217398	2.53e-08	0.0342131	0.87209
AP3M2	NM_006803	4340.9	-0.112433	0.119909	-0.0661216	0.489236	-0.0245359	0.805649	-0.0708479	0.706826	-0.173757	0.00227872	-0.00874656	0.959883	0.0321505	0.875605	-0.13286	0.063115	-0.0797058	0.126146	-0.0609811	0.794026
AP3S1	NM_001284	9070.98	-0.344703	0.250815	-0.226138	0.548857	0.137424	0.684477	0.0188583	1	-0.229909	0.494293	-0.296794	0.341664	0.00493506	0.997313	0.0718199	0.999179	0.428645	0.0223127	0.114991	0.914091
AP3S2	NM_005829	5313.98	0.0375098	0.71836	0.0218987	0.885654	-0.0212373	0.84027	-0.00562614	1	0.0136487	0.926365	0.0461784	0.67332	0.0218411	0.92795	-0.0106885	0.999179	0.249433	1.63e-07	-0.023551	0.938541
AP4B1	NM_001253852	5017.99	-0.0625835	0.459853	0.0708384	0.418413	0.0566718	0.460654	-0.0767501	0.578419	-0.0789316	0.300133	0.0615744	0.488198	0.0527671	0.700828	-0.0877389	0.396693	0.0398205	0.465444	-0.0160477	0.960684
AP4B1-AS1	NR_037864	27.5299	-0.677402	0.362755	-0.332846	NA	0.551723	0.425143	0.207167	1	0.8524	0.0775831	-0.137432	NA	0.111952	NA	1.10178	0.0196204	0.389095	0.380861	1.52995	0.262231
AP4E1	NM_007347	4210.43	-0.169762	0.40765	-0.0728715	0.822841	0.123436	0.530845	0.0265449	1	0.118341	0.619817	0.0722195	0.806827	-0.0922044	0.83065	-0.0460825	0.999179	-0.288035	0.0152512	0.288353	0.630628
AP4M1	NM_001363671	1074.76	0.0635051	0.74097	0.083851	0.703817	0.0534126	0.763647	0.0330667	1	-0.10222	0.570215	-0.0290317	0.918515	0.137126	0.510052	0.0639375	0.988021	0.062496	0.563571	-0.165373	0.704722
AP4S1	NM_001128126	1138.56	-0.0888951	0.68643	0.0812567	0.776985	0.118429	0.511766	-0.0517232	1	-0.00890336	0.979791	0.0518298	0.858977	-0.0149087	0.983361	-0.0756419	0.984255	0.464118	7.42e-06	0.0802818	0.891572
AP5B1	NM_138368	5264.14	0.0295973	0.851974	-0.0696284	0.666438	-0.119725	0.244059	-0.0204993	1	-0.0890768	0.491368	0.0103611	0.968653	0.0729594	0.740553	-0.0264785	0.999179	-0.398352	2.66e-09	-0.118343	0.719138
AP5M1	NM_018229	6284.67	-0.246044	0.300172	-0.0110507	0.983553	0.182685	0.413274	-0.0523084	1	0.0610076	0.877639	0.0664125	0.86803	-0.0681473	0.920672	-0.0735522	0.999179	0.0282858	0.876571	0.307287	0.670748
AP5S1	NM_001204446	2357.76	-0.00553665	0.980054	0.0517576	0.803363	0.0314749	0.844819	-0.0258194	1	-0.0436135	0.823416	0.0336518	0.87698	0.105935	0.562363	0.02867	0.999179	0.0387227	0.673321	-0.0377452	0.934622
AP5Z1	NM_014855	8671.06	0.144645	0.0938492	0.061276	0.653439	-0.0282582	0.81943	0.0551109	0.971703	-0.0370321	0.806451	0.0155494	0.934819	0.105388	0.35888	0.0528064	0.941424	0.261756	5.96e-06	-0.18138	0.539153
APAF1	NM_181861	5391.07	-0.080415	0.662524	0.0824652	0.713389	0.127899	0.370435	-0.0349815	1	0.109639	0.529388	0.168377	0.255552	0.0375281	0.933996	-0.0212099	0.999179	0.155973	0.112165	0.190328	0.675181
APBA1	NM_001163	4.24435	0.956724	NA	-0.146431	NA	0.126372	NA	1.22952	NA	-0.265742	NA	-0.58642	NA	0.638117	NA	0.958793	NA	1.28154	0.341845	-1.2225	NA
APBA2	NM_001353797	3.15643	-2.49789	NA	1.20914	NA	3.25081	NA	-0.456161	NA	-1.07615	NA	0.385808	NA	1.28529	NA	-0.176663	NA	2.28788	0.124137	1.42246	NA
APBA3	NM_004886	4160.97	0.122353	0.43715	-0.0720677	0.752586	-0.131096	0.331614	0.0633246	1	-0.0637865	0.759155	-0.102158	0.565215	0.0402698	0.924337	0.0786412	0.940056	0.275431	0.00165259	-0.185847	0.673243
APBB1	NM_001164	808.363	-0.191337	0.569822	0.0738613	0.892076	-0.00671763	0.988774	-0.271916	0.639919	-0.264589	0.396498	-0.121847	0.787132	0.00723947	0.994199	-0.135503	0.979985	-0.740797	1.77e-05	-0.07301	0.948719
APBB1IP	NM_019043	15597	-0.0731893	0.481419	0.10739	0.246777	0.0741856	0.414522	-0.106393	0.424494	-0.0614187	0.590996	0.0359183	0.803544	-0.00435834	0.988938	-0.101695	0.450881	0.399517	1.15e-13	0.0120952	0.974958
APBB2	NM_004307	1455.13	-0.0158972	0.973194	0.0940148	0.849054	0.00469339	0.992231	-0.105219	1	0.0531542	0.91918	0.185738	0.613834	0.0776273	0.92795	-0.0549562	0.999179	-1.52067	6.06e-21	0.0693536	0.950087
APBB3	NM_006051	1284.74	0.0956741	0.768613	0.0493804	0.919433	-0.0424236	0.902017	0.00387017	1	-0.0492348	0.913096	-0.0313744	0.953775	0.139835	0.781023	0.121975	0.965116	0.258278	0.109938	-0.144633	0.84868
APC	NM_001354905	5672.5	-0.030486	0.838793	-0.0299124	0.882777	-0.0328843	0.810857	-0.0334579	1	0.12815	0.204141	0.156724	0.103345	-0.0281685	0.931042	-0.0567431	0.952865	-0.0245667	0.769504	0.15894	0.650725
APC2	NM_001351273	67.4199	0.324905	0.501316	-0.356572	0.521616	-0.67243	0.054863	0.00904681	1	-0.0714671	0.924797	-0.183288	0.771434	-0.0604488	0.968143	0.0513725	0.999179	0.414769	0.140505	-0.396143	0.745673
APCDD1	NM_153000	0.699158	0.960073	NA	-0.914478	NA	0.800701	NA	2.67521	NA	-1.10022	NA	0.734128	NA	0	NA	-1.67629	NA	-0.922014	NA	-2.06012	NA
APCDD1L	NM_153360	1.82631	1.51415	NA	1.04964	NA	-0.862109	NA	-0.3976	NA	1.47977	NA	-1.75747	NA	-1.75759	NA	1.47962	NA	1.63225	0.431456	-0.0339999	NA
APCDD1L-DT	NR_034147	3.46045	0.0973299	NA	-1.13446	NA	-1.42699	NA	-0.195206	NA	-0.129563	NA	-0.968393	NA	-0.064169	NA	0.774656	NA	-1.51287	0.183531	-0.226061	NA
APCS	NM_001639	0	NA	NA	NA	NA	NA	NA	NA	NA	NA	NA	NA	NA	NA	NA	NA	NA	NA	NA	NA	NA
APEH	NM_001640	21028.6	0.129027	0.597144	0.145404	0.594236	-0.0258949	0.932238	-0.0422713	1	0.0426141	0.910943	0.179934	0.434092	0.101627	0.829496	-0.035693	0.999179	-0.239338	0.072658	-0.0860235	0.902497
APELA	NM_001297550	139.677	-0.663095	0.0982938	0.655521	0.0825271	0.889292	0.00695671	-0.429323	0.597758	-0.290001	0.671628	0.472464	0.372141	0.268173	0.813123	-0.494293	0.548046	-1.96406	1.48e-12	0.373432	0.792694
APEX1	NM_001641	35039.6	0.0203275	0.885703	0.0773902	0.525563	0.0757223	0.432238	0.0186596	1	0.0205274	0.910204	0.0991212	0.331507	0.0506666	0.814649	-0.0279272	0.999179	-0.136614	0.0271759	0.000545517	0.999057
APEX2	NM_014481	8927.05	0.0432862	0.677385	0.00647425	0.969759	-0.0435248	0.637901	-0.00671291	1	-0.0688028	0.461077	-0.0273114	0.842367	-0.0135543	0.966357	-0.0550457	0.87291	-0.199404	7.18e-05	-0.111768	0.671268
APH1A	NM_016022	17240.6	0.0477574	0.571757	-0.0179951	0.896659	-0.0798331	0.212976	-0.0140806	1	-0.0318947	0.76045	-0.0603412	0.460214	-0.0305889	0.8658	-0.00214243	0.999179	-0.0072605	0.899904	-0.0793506	0.707189
APH1B	NM_031301	1258.98	-0.155346	0.430032	-0.0443014	0.89882	-0.0210729	0.938048	-0.132117	0.856442	-0.131548	0.520495	-0.100025	0.680666	-0.0686824	0.88362	-0.100206	0.92826	0.45756	1.71e-05	0.0240759	0.973576
API5	NM_001142930	21512.2	-0.122575	0.478918	-0.000971405	0.998043	0.141425	0.333315	0.0198219	1	0.0675572	0.76786	0.0489809	0.85061	-0.035657	0.942299	-0.0170807	0.999179	0.0116467	0.925868	0.190394	0.681942
APIP	NM_015957	4400.96	0.00681727	0.960918	-0.0332265	0.820391	-0.0393099	0.683644	0.000733819	1	0.116223	0.107557	0.025152	0.862502	-0.0302518	0.896814	0.0608191	0.813013	0.0736146	0.193186	0.109728	0.673243
APLF	NM_173545	418.502	-0.292121	0.0752658	-0.0639819	0.846991	0.238382	0.140155	0.0102422	1	0.195572	0.304139	0.116859	0.647082	-0.107145	0.783252	-0.0284322	0.999179	-0.388857	0.000767521	0.487988	0.169312
APLN	NM_017413	48.2106	-1.48312	0.34311	-0.154958	0.949165	1.55378	0.242575	0.225626	1	0.19245	0.897315	0.593329	NA	0.428552	NA	0.0276733	0.999179	3.7394	8.72e-10	1.67583	0.660423
APLNR	NM_005161	0.331521	0	NA	0	NA	2.49969	NA	2.46219	NA	-0.148283	NA	-2.02813	NA	-0.722323	NA	1.15734	NA	1.81962	NA	-0.0850273	NA
APLP1	NM_001024807	177.894	-0.496561	0.544998	-0.496853	0.596145	-0.414827	0.59194	-0.414535	0.966786	-0.598374	0.427445	-0.693411	0.341664	-0.0523967	0.984307	0.0426396	0.999179	1.07352	0.0139642	-0.101701	0.971992
APLP2	NM_001642	4167.74	-0.0745742	0.650479	-0.125399	0.412313	-0.120084	0.345844	-0.0692595	0.998992	-0.0427603	0.848089	-0.0200907	0.940581	-0.0646257	0.834255	-0.0872953	0.874307	0.233911	0.0047669	0.0321175	0.952467
APMAP	NM_020531	6319.04	0.00628984	0.954108	0.0212289	0.863624	0.0214257	0.803252	0.0064866	1	-0.103607	0.0689949	0.0301131	0.772966	0.13523	0.0143158	0.00150964	0.999179	0.0191802	0.71215	-0.109598	0.622926
APOA1	NM_001318018	6.47144	1.69741	NA	0.59391	NA	-2.3263	NA	-1.2228	NA	-0.256474	NA	-0.496959	NA	0.0721275	NA	0.312612	NA	-0.0299637	0.982445	-1.95339	NA
APOA1-AS	NR_126362	0.535374	-1.59656	NA	-1.5839	NA	2.03674	NA	2.02409	NA	0.823298	NA	0	NA	0.956152	NA	1.95551	NA	-2.55287	NA	2.42054	NA
APOA2	NM_001643	0.162264	-1.02446	NA	-0.0251717	NA	0	NA	-0.989585	NA	0	NA	0.785643	NA	1.1197	NA	0.195692	NA	-0.994031	NA	0.886312	NA
APOA4	NM_000482	0.413346	0.924058	NA	0	NA	1.93431	NA	2.88361	NA	2.15191	NA	0.785685	NA	-1.17049	NA	0.195651	NA	-0.0322383	NA	1.22869	NA
APOA5	NM_001166598	0.152766	0.883424	NA	1.76316	NA	0.0252133	NA	-0.854375	NA	0	NA	0	NA	0	NA	0	NA	-0.0326173	NA	-1.02139	NA
APOB	NM_000384	2.21396	-0.0573497	NA	-1.06631	NA	-0.236908	NA	0.772039	NA	0.204924	NA	-4.22078	NA	-0.839443	NA	3.5862	NA	0.152081	0.934407	0.262806	NA
APOBEC1	NM_001644	0	NA	NA	NA	NA	NA	NA	NA	NA	NA	NA	NA	NA	NA	NA	NA	NA	NA	NA	NA	NA
APOBEC2	NM_006789	1.62857	-1.97535	NA	1.4822	NA	3.29324	NA	-0.164255	NA	-0.123038	NA	-0.201453	NA	-1.84154	NA	-1.76312	NA	1.92227	0.363604	1.85223	NA
APOBEC3A	NM_001270406	20.7898	-0.274614	0.815331	-0.200489	NA	0.578538	NA	0.504414	0.955675	0.303691	0.82731	0.662818	NA	0.0211878	NA	-0.337939	0.99044	-0.413105	0.509706	0.578553	0.823002
APOBEC3A_B	NM_001193289	263.217	-0.102516	0.726571	0.211993	0.402205	0.247126	0.221897	-0.0673826	1	-0.152906	0.582522	-0.0126435	0.98066	0.0895312	0.881433	-0.0507314	0.999179	0.00116974	0.995127	-0.0501363	0.95762
APOBEC3B	NM_004900	4623.61	0.00977252	0.954158	0.132247	0.195894	0.0536792	0.653406	-0.0687954	0.927575	-0.0856505	0.477015	-0.00986871	0.967659	0.11088	0.405531	0.0350985	0.999179	-0.095767	0.180683	-0.0951119	0.759457
APOBEC3B-AS1	NR_104187_dup1	8.66793	-1.04441	NA	-0.212922	NA	0.917105	NA	0.0856145	1	-0.101033	NA	-0.116853	NA	0.0430173	NA	0.0588367	0.999179	-0.62089	0.394121	0.943566	NA
APOBEC3C	NM_014508	40753.9	0.0505947	0.603816	0.149879	0.0194986	0.0876564	0.235331	-0.0116282	1	0.00769603	0.961336	0.0848664	0.31589	0.0860115	0.389867	0.0088412	0.999179	0.428428	7.81e-20	-0.0425731	0.86946
APOBEC3D	NM_152426	6381.84	0.15486	0.0883871	0.147951	0.102142	0.0669725	0.530517	0.0738814	0.867327	0.136033	0.12466	0.0776444	0.524515	-0.00974954	0.982688	0.0486393	0.973689	0.561589	1.18e-21	-0.018497	0.966235
APOBEC3F	NM_145298	5881.33	0.37507	1.98e-10	0.185604	0.0113817	-0.0141272	0.917325	0.175339	0.0267249	0.178452	0.0108751	0.00340686	0.986672	-0.0763447	0.599434	0.0987009	0.486754	0.860722	1.02e-57	-0.19627	0.42079
APOBEC3G	NM_021822	13920.1	0.24095	0.00115244	0.285843	5.62e-05	0.167063	0.0414953	0.12217	0.390744	0.131534	0.156773	0.126562	0.201206	0.0918637	0.538898	0.0968356	0.611365	0.759678	8.29e-38	-0.10908	0.717895
APOBEC3H	NM_181773	1000.79	-0.294075	0.40765	-0.164388	0.751062	-0.0280047	0.956953	-0.157692	1	-0.206875	0.608243	-0.296127	0.399958	-0.0425622	0.973095	0.0466897	0.999179	0.903977	2.77e-06	0.087477	0.945305
APOBEC4	NM_203454	3.03137	0.119229	NA	0.308791	NA	-0.192112	NA	-0.381673	NA	1.70076	NA	0.720968	NA	-0.94088	NA	0.038905	NA	0.759446	0.627312	1.58142	NA
APOBR	NM_018690	1574.16	-0.410689	0.0268027	0.0867371	0.826114	0.194926	0.376562	-0.3025	0.257207	-0.265997	0.23206	0.133947	0.674969	0.10691	0.84734	-0.293034	0.305205	-0.98889	1.68e-13	0.144941	0.83386
APOC1	NM_001645	57.8349	-0.431163	0.474618	-0.142497	0.886577	0.140877	0.844561	-0.147789	1	-0.228073	0.756584	0.092529	NA	0.143795	NA	-0.176807	0.996575	0.512711	0.132175	0.203373	0.913395
APOC1P1	NR_028414	0.440476	0	NA	0	NA	0.971322	NA	0.933819	NA	-2.0208	NA	1.82602	NA	0	NA	-3.68849	NA	1.85047	NA	-1.95818	NA
APOC2	NM_000483	33.8885	-0.139576	0.851735	-0.0749791	0.943158	0.20972	0.740853	0.145123	1	0.734266	0.882196	1.71748	NA	1.17801	NA	0.194818	0.999179	-7.54147	2.74e-09	0.874433	0.899153
APOC3	NM_000040	0	NA	NA	NA	NA	NA	NA	NA	NA	NA	NA	NA	NA	NA	NA	NA	NA	NA	NA	NA	NA
APOC4	NM_001646	5.92309	0.493025	NA	-0.993667	NA	-1.86164	NA	-0.374952	NA	0.18659	NA	0.79322	NA	0.0691826	NA	-0.537445	NA	-0.57551	0.678399	-0.305261	NA
APOC4-APOC2	NR_037932	45.4934	0.0113808	0.989604	0.00131839	0.999189	0.0113936	0.989045	0.021456	1	0.26871	0.875427	0.921198	NA	0.316691	NA	-0.335797	0.992714	-4.02498	2.75e-17	0.257915	0.93147
APOD	NM_001647	30.1815	-0.281686	0.830352	-0.204666	NA	0.23337	0.852454	0.156351	1	-0.344996	0.794933	-0.393677	NA	0.256618	NA	0.3053	0.996707	1.37112	0.0157437	-0.0634129	0.989775
APOE	NM_001302691	32.9119	0.136467	0.894412	0.000260959	0.999765	-0.383349	0.629695	-0.247143	1	-0.422418	0.558633	-0.726006	NA	-0.477313	NA	-0.173725	0.999179	1.68273	1.97e-05	-0.5586	0.768604
APOF	NM_001638	12.7098	0.518561	NA	-0.317091	NA	0.00795641	NA	0.843604	1	0.822333	NA	0.388485	NA	-0.534534	NA	-0.100689	0.999179	0.300486	0.854379	0.302924	0.971992
APOH	NM_000042	0	NA	NA	NA	NA	NA	NA	NA	NA	NA	NA	NA	NA	NA	NA	NA	NA	NA	NA	NA	NA
APOL1	NM_003661	5093.86	0.998844	1.08e-74	-0.0369237	0.826594	-0.152206	0.0393529	0.883562	5.67e-58	1.02934	7.24e-82	-0.0266624	0.874222	-0.180193	0.0165682	0.875814	7.6e-59	0.352216	4.6e-10	0.0308008	0.932265
APOL2	NM_030882	9607.82	1.26937	8.58e-154	0.0493202	0.69893	-0.232662	3.38e-05	0.987388	1.33e-92	1.10645	7.03e-122	-0.0326721	0.802312	-0.180995	0.00388751	0.958127	4.23e-91	0.835191	1.07e-66	-0.162605	0.506141
APOL3	NM_145639	8779.85	0.921354	3.74e-31	0.106152	0.538109	0.0654514	0.666701	0.880654	1.74e-28	0.728818	1.29e-19	0.226073	0.0445444	0.0697076	0.814649	0.572452	6.66e-12	0.771621	6.19e-23	-0.192241	0.655474
APOL4	NM_030643	44.9641	4.85831	2.02e-16	-0.435307	0.866126	-0.00182183	0.99797	5.29179	4.76e-15	3.82839	3.59e-20	-1.61573	NA	0.0339212	NA	5.47802	2.27e-18	1.22844	0.0986828	-1.0296	0.68804
APOL5	NM_030642	0.342747	0	NA	0	NA	2.69545	NA	2.65795	NA	2.72614	NA	0.785628	NA	-2.70641	NA	-0.766133	NA	-0.0320246	NA	2.78874	NA
APOL6	NM_030641	26964.2	2.38737	4.38e-142	0.157787	0.401045	-0.136673	0.392026	2.09291	5.21e-109	1.72858	1.29e-74	0.176069	0.30197	-0.145937	0.546118	1.40658	4.61e-49	1.07608	1.28e-29	-0.658492	0.000369543
APOLD1	NM_001130415	801.261	-0.0756149	0.773594	0.0250852	0.948633	0.0186969	0.951625	-0.0820031	1	0.12067	0.644823	0.123809	0.647642	-0.102992	0.818961	-0.10613	0.952532	-0.541181	6.03e-06	0.196579	0.738308
APOM	NR_045828	343.578	-0.151809	0.596381	0.0326428	0.944562	0.251186	0.24881	0.0667346	1	0.0211528	0.961253	-0.0863104	0.804243	0.0037312	0.997313	0.111194	0.965489	0.736532	8e-08	0.173278	0.799654
APOO	NM_024122	1337.34	0.00223475	0.992881	-0.0609626	0.811863	-0.0303534	0.880538	0.032844	1	0.0511146	0.830722	0.0810942	0.695462	0.0306977	0.94948	0.000718189	0.999686	0.0459996	0.679948	0.0492692	0.930593
APOOL	NM_198450	3414.84	-0.111721	0.693109	-0.0449299	0.919433	0.117109	0.63837	0.0503177	1	0.077975	0.829071	0.0418276	0.923721	-0.0291384	0.974134	0.00700903	0.999179	-0.161356	0.297199	0.189917	0.7705
APOOP5	NR_028471	3.34308	-0.135809	NA	0.240514	NA	-0.316304	NA	-0.692625	NA	-0.189111	NA	0.573577	NA	0.55867	NA	-0.204014	NA	-0.134253	0.930134	-0.0528462	NA
APP	NM_201413	11541.2	0.1035	0.893756	0.159552	0.867105	0.15205	0.820581	0.095998	1	0.0334491	0.966573	0.0449546	0.960997	-0.000448973	0.999845	-0.0119544	0.999179	8.59325	2.36e-219	-0.0696901	0.971992
APPBP2	NM_006380	4876.71	-0.201272	0.397464	-0.0936518	0.800281	0.0833043	0.750914	-0.0243158	1	0.0206469	0.961336	-0.0415299	0.922138	-0.0964939	0.855799	-0.0343171	0.999179	0.249066	0.0807267	0.222135	0.729245
APPL1	NM_012096	8281.72	-0.194427	0.191762	-0.0160872	0.957563	0.0588753	0.749017	-0.119464	0.820074	0.0459337	0.858918	0.0514216	0.837525	-0.0836274	0.796828	-0.0891153	0.923469	0.110284	0.298234	0.24064	0.625836
APPL2	NM_018171	1114.13	0.0362071	0.85988	-0.0474822	0.855033	-0.0619663	0.713596	0.021723	1	-0.0681468	0.753129	-0.165396	0.267632	-0.0204888	0.971351	0.0767606	0.961086	-0.355645	5.9e-05	-0.104054	0.810694
APRT	NM_001030018	15338.8	0.00157625	0.99355	0.0580235	0.780288	0.0849826	0.514468	0.0285353	1	0.0212147	0.928335	0.0575253	0.761084	0.060859	0.834458	0.0245483	0.999179	-0.15957	0.0494839	0.0199763	0.970155
APTR	NR_038361	801.263	0.207407	0.293502	0.325632	0.0345044	-0.0289564	0.915467	-0.147181	0.813643	0.190609	0.29126	0.123976	0.59073	0.110321	0.756458	0.176954	0.568979	0.729454	2.94e-11	-0.0165406	0.985352
APTX	NM_001195248	4822.19	0.0238216	0.815331	0.0438637	0.686479	0.0367002	0.660806	0.016658	1	0.0126369	0.925811	0.0613238	0.467609	0.0589888	0.618283	0.0103019	0.999179	0.15952	0.000426951	-0.0108763	0.971992
AQP1	NM_001329872	8.2694	-0.458886	NA	-0.22651	NA	0.539898	NA	0.307522	NA	0.0251582	NA	0.338992	NA	0.159764	NA	-0.154069	NA	-0.0264742	0.982877	0.48407	NA
AQP10	NM_080429	0.476645	0	NA	0	NA	0	NA	0	NA	-1.23494	NA	-3.0151	NA	1.73209	NA	3.51211	NA	2.80664	NA	-1.17138	NA
AQP11	NM_173039	49.7668	0.428201	0.326387	0.299103	0.590972	-0.204248	0.649371	-0.0751508	1	-0.0133209	0.988944	0.429507	NA	0.315612	NA	-0.127216	0.999179	0.109706	0.736566	-0.441356	0.715984
AQP12A	NM_198998	0	NA	NA	NA	NA	NA	NA	NA	NA	NA	NA	NA	NA	NA	NA	NA	NA	NA	NA	NA	NA
AQP12B	NM_001102467	0.0992633	0	NA	0	NA	0	NA	0	NA	0	NA	0	NA	2.2076	NA	2.24522	NA	-0.0324474	NA	-0.0751465	NA
AQP2	NM_000486	0.144268	0	NA	0	NA	0	NA	0	NA	1.5037	NA	0	NA	0.263872	NA	1.94345	NA	-0.032318	NA	1.56704	NA
AQP3	NM_004925	839.915	-0.173452	0.812092	0.580003	0.300706	0.610575	0.203115	-0.142879	1	-0.121302	0.905031	0.313682	0.677635	0.273937	0.826493	-0.161047	0.999179	-2.11284	2.96e-11	0.0525294	0.983746
AQP4	NM_001650	1.39745	-1.67271	NA	-1.30725	NA	0.323834	NA	-0.0416292	NA	-1.12844	NA	0.822149	NA	-1.70748	NA	-3.65803	NA	-1.26443	0.600463	0.543449	NA
AQP4-AS1	NR_026908	0.103925	1.42881	NA	0	NA	-0.520084	NA	0.933843	NA	0	NA	0	NA	0	NA	0	NA	-0.0324829	NA	-1.56705	NA
AQP5	NM_001651	0	NA	NA	NA	NA	NA	NA	NA	NA	NA	NA	NA	NA	NA	NA	NA	NA	NA	NA	NA	NA
AQP6	NM_001652	0.165808	0	NA	0	NA	0	NA	0	NA	-0.138355	NA	0.720595	NA	-0.803705	NA	-1.66252	NA	0.929488	NA	-0.075426	NA
AQP7	NR_134515	0.838719	0.922343	NA	0.664773	NA	-3.63125	NA	-3.37368	NA	-1.10022	NA	1.29361	NA	0	NA	-2.23577	NA	-1.72582	NA	-2.02274	NA
AQP7P1	NR_002817	16.2228	0.443998	0.633136	0.897055	NA	-0.26615	NA	-0.719207	0.624632	1.65012	0.506968	1.63099	NA	-1.06149	NA	-1.04237	0.940056	-5.07437	1.44e-05	1.20666	0.799654
AQP7P3	NR_026558	8.23984	0.805166	NA	0.964347	NA	-0.215676	NA	-0.374858	NA	-2.58831	NA	0.814378	NA	1.11979	NA	-2.28284	NA	-3.29309	0.00402915	-3.39281	NA
AQP8	NM_001169	2.06434	-1.73014	NA	-0.716894	NA	0.388954	NA	-0.624284	NA	-0.0917343	NA	0.536597	NA	-0.143519	NA	-0.771846	NA	-0.710949	0.652105	1.63886	NA
AQP9	NM_020980	29.468	0.440867	0.782103	1.27652	NA	-0.478305	0.739216	-1.31395	0.394162	0.085606	0.945185	0.0162814	NA	0.0468964	NA	0.116221	0.999179	3.91377	4.23e-11	-0.355221	0.919979
AQR	NM_014691	10953.6	-0.0455565	0.698152	0.0371003	0.81547	0.0521224	0.607735	-0.0305344	1	0.0343523	0.815563	0.0446065	0.745789	-0.0107789	0.977919	-0.0210331	0.999179	-0.141144	0.015346	0.0801922	0.765905
AR	NM_001011645	5.20572	1.40284	NA	1.70664	NA	-0.154848	NA	-0.458641	NA	0.0819127	NA	0.312289	NA	0.0125997	NA	-0.217776	NA	2.41505	0.0888465	-1.32023	NA
ARAF	NM_001654	12326.9	0.0847911	0.433029	-0.014697	0.939978	-0.105188	0.237655	-0.00569992	1	0.0127077	0.947108	-0.0180712	0.924169	0.00950207	0.982688	0.040281	0.989185	0.0898799	0.170332	-0.0717464	0.80363
ARAP1	NM_001040118	20976.5	-0.0216499	0.882003	0.0169744	0.932214	-0.0982744	0.295523	-0.136899	0.226928	-0.146101	0.0873214	0.025872	0.884332	0.0806123	0.619359	-0.0913609	0.643899	0.242886	6.26e-05	-0.124161	0.68087
ARAP1-AS2	NR_146780	11.7442	0.099402	NA	0.205921	NA	-0.0128991	NA	-0.119418	1	-0.771668	NA	-0.0690313	NA	0.638648	NA	-0.0639885	0.999179	0.457424	0.547984	-0.870868	0.777877
ARAP2	NM_015230	4260	0.218107	0.362438	-0.0233134	0.957958	0.222218	0.283502	0.463639	0.00779574	0.492186	0.0021532	-0.0494202	0.905794	-0.117805	0.808992	0.4238	0.021966	0.282461	0.0506811	0.274281	0.683854
ARAP3	NM_022481	5.44287	0.268668	NA	0.0897229	NA	0.213505	NA	0.392449	NA	-1.08908	NA	-1.40016	NA	0.620339	NA	0.931417	NA	-0.451147	0.675183	-1.35769	NA
ARC	NM_015193	6.10846	-0.685375	NA	-1.3126	NA	-1.46641	NA	-0.83919	NA	-0.593552	NA	-0.926342	NA	0.94514	NA	1.27793	NA	-0.17425	0.874966	0.0925427	NA
ARCN1	NM_001655	29015.9	0.0234308	0.821503	-0.0717482	0.399075	-0.0704672	0.319621	0.0247118	1	0.0176508	0.897315	-0.0256026	0.834058	-0.0419237	0.787673	0.00132966	0.999179	0.351378	8.41e-16	-0.00550686	0.988895
AREG	NM_001657	11.405	0.184329	NA	-0.748067	NA	-1.3359	NA	-0.40351	1	-0.399098	NA	-0.5754	NA	0.0142027	NA	0.190504	0.999179	0.88279	0.284725	-0.583109	NA
AREL1	NM_001039479	9018.76	0.0559553	0.464175	-0.00387934	0.979649	-0.109813	0.0451894	-0.0499783	0.866663	0.0413918	0.641047	-0.0106053	0.938007	-0.015709	0.94262	0.0362882	0.951888	0.0644439	0.159235	-0.0142628	0.961134
ARF1	NM_001658	52095.9	0.0641138	0.518824	-0.0778598	0.440757	-0.127088	0.073229	0.0148857	1	-0.018762	0.906411	-0.100189	0.243411	-0.0398139	0.844994	0.0416132	0.973689	0.134595	0.013019	-0.0825469	0.742056
ARF3	NM_001659	38403.5	0.073631	0.56686	0.0380738	0.84338	-1.11e-06	0.999986	0.035556	1	0.0669739	0.633081	0.0648747	0.66251	0.0329373	0.920237	0.0350366	0.999179	0.246908	0.00017928	-0.00633312	0.991813
ARF4	NM_001660	14245.2	-0.136502	0.425388	-0.0392548	0.896406	0.0933499	0.578107	-0.00389716	1	-0.103572	0.589671	-0.0955866	0.647766	0.0676283	0.860226	0.0596431	0.9939	0.751203	9.55e-17	0.0331642	0.959646
ARF4-AS1	NR_132369	63.54	-0.212372	0.724331	0.134364	0.873501	0.285985	0.563697	-0.0607513	1	-0.348867	0.530061	-0.281453	0.659211	0.571307	0.258928	0.503892	0.467081	-0.118092	0.740121	-0.136364	0.93934
ARF5	NM_001662	12173.3	0.0123069	0.936596	0.028346	0.873608	0.0532869	0.616571	0.0372478	1	-0.0220519	0.901333	0.0182049	0.923454	0.0705501	0.678064	0.0302933	0.999179	-0.0616271	0.362447	-0.0340138	0.92429
ARF6	NM_001663	28245.2	0.00968063	0.955621	0.0982053	0.444291	0.159383	0.077258	0.0708583	0.927869	0.0411165	0.813615	0.0439207	0.796693	0.0425358	0.884482	0.0397317	0.995306	-0.100079	0.174043	0.0317011	0.939813
ARFGAP1	NM_018209	11797	0.0710541	0.389031	0.0667612	0.459466	0.048458	0.547977	0.0527509	0.895076	-0.00488473	0.973311	0.131867	0.0319402	0.235527	4.15e-06	0.0987745	0.255967	0.470913	6.52e-27	-0.0756495	0.735073
ARFGAP2	NM_032389	14897.3	0.0993726	0.314028	0.145835	0.0685389	0.0507143	0.625659	0.00425198	1	-0.0120702	0.947777	0.0926533	0.353398	0.105849	0.329933	0.00112588	0.999435	0.135996	0.0222523	-0.111098	0.695068
ARFGAP3	NM_014570	9045.8	-0.235431	0.0558196	-0.16735	0.247068	-0.0420341	0.82209	-0.110115	0.838383	-0.191005	0.130926	-0.156442	0.282118	-0.0521755	0.895945	-0.0867385	0.908529	0.97241	6.34e-32	0.0446732	0.934227
ARFGEF1	NM_006421	10110.5	-0.128247	0.33839	-0.0618602	0.76298	0.0382405	0.811984	-0.0281461	1	0.0178154	0.941982	0.0368976	0.86803	-0.0448511	0.900639	-0.0639333	0.964829	-0.0514333	0.579469	0.146321	0.696344
ARFGEF2	NM_006420	14448.9	0.0504558	0.669482	0.0111473	0.953125	0.0426978	0.697889	0.0820062	0.74498	0.179214	0.0133777	0.173674	0.0231514	0.0527385	0.788998	0.0582781	0.902866	0.210608	0.000272832	0.129045	0.668262
ARFGEF3	NM_020340	36.9437	0.0524949	0.95852	-0.480917	0.569528	-0.052185	0.957829	0.481227	0.851368	0.110098	0.918078	-0.278341	NA	-0.323781	NA	0.0646579	0.999179	0.630726	0.115164	0.0578455	0.98401
ARFIP1	NM_001025593	1744.88	-0.100524	0.6428	-0.117814	0.628629	0.04895	0.831103	0.0662393	1	0.138769	0.49439	-0.0407964	0.901467	-0.113636	0.743117	0.0659301	0.994484	-0.478806	7.22e-06	0.239554	0.671268
ARFIP2	NR_163424	8240.39	0.0750111	0.53361	-0.0158699	0.939334	-0.0984617	0.312936	-0.00758072	1	-0.0726334	0.561843	0.0340824	0.840908	0.13218	0.223561	0.0254639	0.999179	0.327765	9.74e-08	-0.147338	0.657237
ARFRP1	NM_001267547	7260.73	-0.0202705	0.905915	0.29637	0.000215793	0.305807	0.000107162	-0.0108339	1	-0.101965	0.416411	0.219252	0.0163114	0.286652	0.000703174	-0.0345656	0.999179	0.00213957	0.984014	-0.0814026	0.812435
ARG1	NR_160934	0.464144	-1.02455	NA	-0.987039	NA	1.71006	NA	1.67256	NA	1.51421	NA	2.68182	NA	0.86995	NA	-0.297567	NA	-0.993861	NA	2.53901	NA
ARG2	NM_001172	78.9154	-0.676187	0.563405	-0.801059	0.515319	-0.396003	0.741064	-0.271131	1	-1.27566	0.155578	-1.32848	0.147304	0.0262463	0.993463	0.0790605	0.999179	0.0877415	0.912286	-0.599419	0.843984
ARGFX	NM_001012659	0.234655	-0.0782142	NA	-0.0252048	NA	-0.936619	NA	-0.989618	NA	-1.10017	NA	0.678782	NA	0	NA	-1.62078	NA	-0.0323778	NA	-1.02174	NA
ARGFXP2	NR_002222	0.183638	-1.02446	NA	-0.0251717	NA	0.971319	NA	-0.0278052	NA	0.823267	NA	0	NA	-0.803706	NA	0	NA	-0.993945	NA	1.8479	NA
ARGLU1	NM_018011	16835.5	0.0206137	0.899952	-0.0825518	0.564954	-0.098706	0.349699	0.00445959	1	0.0434211	0.801759	-0.025382	0.901335	-0.0897398	0.612444	-0.0209367	0.999179	-0.157353	0.0254285	0.0231158	0.961118
ARHGAP1	NM_004308	12072	0.0533103	0.643462	-0.0350874	0.829185	-0.0897927	0.308374	-0.00139494	1	-0.0720549	0.508342	0.0500428	0.708075	0.0609123	0.734499	-0.0611854	0.878716	-0.0938839	0.132888	-0.12504	0.673243
ARHGAP10	NM_024605	5340.6	0.0498226	0.712702	0.138483	0.155934	0.108353	0.260117	0.0196926	1	-0.0556843	0.692168	-0.00374859	0.986672	0.0490751	0.837684	-0.00286053	0.999179	0.818995	4.98e-43	-0.105231	0.730378
ARHGAP11A	NM_199357	5364.71	-0.0147882	0.952103	-0.0309513	0.919433	-0.0564804	0.76217	-0.0403173	1	0.160174	0.305651	0.14985	0.367884	-0.0414899	0.9291	-0.031166	0.999179	-0.47107	3.16e-07	0.175274	0.701235
ARHGAP11A-SCG5	NM_001368319	4763.68	-0.0244265	0.924765	-0.0287655	0.93097	-0.0450497	0.834162	-0.0407107	1	0.158707	0.359402	0.144559	0.436875	-0.0449561	0.928726	-0.0308084	0.999179	-0.464343	2.52e-06	0.183438	0.707189
ARHGAP11B	NM_001039841	1042.72	-0.0183577	0.956408	0.127474	0.674845	0.0624876	0.817238	-0.0833445	1	0.187698	0.41821	0.257572	0.2123	0.0199444	0.982951	-0.0499301	0.999179	-0.416975	0.00142626	0.206377	0.739276
ARHGAP12	NM_018287	1382.69	-0.279503	0.123489	0.135846	0.607726	0.2561	0.13052	-0.159249	0.790725	-0.120743	0.633381	0.0577382	0.866593	0.0187561	0.982688	-0.159725	0.743974	0.0693295	0.635211	0.159026	0.782664
ARHGAP15	NM_018460	6369.23	-0.0473062	0.838793	0.135767	0.514274	0.205169	0.160903	0.0220954	1	0.133368	0.482053	0.118454	0.574116	0.00439912	0.993463	0.0193131	0.999179	-0.175408	0.113551	0.180983	0.713338
ARHGAP17	NM_018054	29213.9	0.103876	0.463596	0.0998195	0.535037	-0.0306522	0.855557	-0.026596	1	-0.119985	0.374149	0.0605624	0.750639	0.0420695	0.910555	-0.138478	0.467726	-0.0643753	0.481197	-0.223515	0.578079
ARHGAP18	NM_033515	2896.21	-0.198236	0.291072	-0.0520727	0.876618	-0.0274054	0.916555	-0.173569	0.634606	-0.144918	0.470313	-0.115147	0.626109	-0.139046	0.641341	-0.168817	0.612897	0.545531	3.54e-07	0.0536298	0.938119
ARHGAP19	NM_032900	8761.95	-0.00859515	0.970494	0.0653739	0.775504	0.0524472	0.754154	-0.0215219	1	0.0707815	0.720381	0.228316	0.0529219	0.0947373	0.711515	-0.062797	0.983954	-0.455473	3.23e-08	0.0796976	0.853835
ARHGAP19-SLIT1	NR_037909	2668.4	0.0517586	0.820898	0.0848555	0.746897	0.00529124	0.984338	-0.0278056	1	0.0923096	0.682981	0.262846	0.0663835	0.0786807	0.838693	-0.091856	0.940056	-0.385801	0.000128389	0.0408928	0.950875
ARHGAP20	NM_001258417	29.9238	-0.317587	0.675582	-0.0160332	NA	0.177646	0.82209	-0.123908	1	-0.945521	0.0327993	-0.897511	NA	-0.180522	NA	-0.228531	0.993961	0.882558	0.0123406	-0.627785	0.713338
ARHGAP21	NM_001367455	5053.61	0.00948891	0.954158	0.206101	0.00880475	0.0814423	0.424366	-0.11517	0.462805	-0.0803213	0.511027	0.261021	0.000510964	0.206593	0.0156612	-0.134749	0.280919	-0.637931	2.53e-26	-0.0894837	0.766648
ARHGAP22	NM_001347738	38.6629	0.682018	0.642986	1.21324	0.316222	1.31052	0.0792917	0.779307	0.654829	0.0492634	0.956285	-0.0302552	NA	-0.047043	NA	0.0324756	0.999179	4.68888	6.01e-16	-0.632721	0.816003
ARHGAP22-IT1	NR_146782	0.261143	0	NA	0	NA	0	NA	0	NA	2.26905	NA	-1.13777	NA	-3.21076	NA	0	NA	0.929528	NA	2.33201	NA
ARHGAP23	NM_001199417	1122.5	-0.106746	0.773169	0.00538178	0.993504	-0.031407	0.941499	-0.143535	0.998992	-0.305868	0.249537	0.0081927	0.988959	0.0883127	0.91548	-0.225748	0.732586	0.720227	1.38e-05	-0.198877	0.807189
ARHGAP24	NM_001025616	343.678	-0.491272	0.0233212	0.116371	0.787288	0.136084	0.65957	-0.471559	0.0385427	-0.213683	0.381487	-0.0256974	0.959294	-0.199802	0.568914	-0.387788	0.0643108	1.57015	1.31e-28	0.277779	0.707189
ARHGAP25	NM_001364821	2043	-0.0933933	0.617469	0.508541	4.74e-07	0.450196	1.35e-05	-0.151737	0.594934	0.0376754	0.89101	0.210045	0.131831	0.200995	0.200289	0.028625	0.999179	0.252405	0.00882505	0.13139	0.769014
ARHGAP26	NM_001135608	7311.5	-0.246877	0.140012	0.0790569	0.792036	0.0974514	0.623825	-0.228482	0.301485	-0.347361	0.0110702	-0.0501831	0.875519	-0.0410708	0.943665	-0.338249	0.0250202	-0.743201	1.44e-12	-0.100188	0.858461
ARHGAP26-AS1	NR_046680	0	NA	NA	NA	NA	NA	NA	NA	NA	NA	NA	NA	NA	NA	NA	NA	NA	NA	NA	NA	NA
ARHGAP26-IT1	NR_046816	3.58327	-1.61193	NA	0.105277	NA	2.21922	NA	0.502021	NA	0.604893	NA	-0.671017	NA	-0.849432	NA	0.426472	NA	-1.04264	0.389282	2.21699	NA
ARHGAP27	NM_199282	7745.31	0.317337	6.13e-14	-0.148714	0.00447013	-0.263147	3.22e-09	0.202904	1.78e-05	0.30383	1.36e-12	-0.155263	0.00328816	-0.20845	1.51e-05	0.250643	3.07e-08	-0.181195	1.78e-05	-0.0131816	0.966235
ARHGAP27P1	NR_027487	665.714	0.126919	0.680479	-0.007865	0.989946	-0.149648	0.570415	-0.0148632	1	0.124783	0.717941	0.0113922	0.98375	-0.0131977	0.988536	0.100193	0.989185	0.0103898	0.960814	-0.00185855	0.999057
ARHGAP27P1-BPTFP1-KPNA2P3	NR_026899	658.536	0.0756685	0.805986	-0.106419	0.778222	-0.202595	0.353729	-0.0205075	1	0.0776232	0.83653	-0.0589628	0.884626	-0.127595	0.789411	0.00899135	0.999179	-0.158564	0.320041	0.00224964	0.999057
ARHGAP27P2	NR_027283	41.8565	0.246376	0.668252	0.108047	0.906228	-0.0502597	0.943136	0.08807	1	0.338137	0.598316	0.000226131	NA	-0.0753819	NA	0.262529	0.96347	-0.767747	0.0162157	0.0920415	0.966235
ARHGAP28	NM_001366231	1.97233	0.649369	NA	0.848966	NA	0.0333801	NA	-0.166216	NA	-1.55029	NA	-2.38606	NA	2.65262	NA	3.48837	NA	0.046159	0.984361	-2.1991	NA
ARHGAP29	NM_001328664	43.5152	-0.0142214	0.990468	0.517983	0.587873	0.583501	0.407796	0.0512976	1	0.0862798	0.950223	0.182559	NA	0.0116773	NA	-0.0846021	0.999179	0.397408	0.439889	0.100575	0.972461
ARHGAP30	NM_001025598	43477.9	-0.124774	0.0418859	0.0564518	0.545985	0.0759468	0.259545	-0.105279	0.174013	-0.0739121	0.32404	0.137469	0.0185935	0.141123	0.0185561	-0.0702585	0.59787	0.374079	1.77e-18	0.051162	0.816177
ARHGAP31	NM_020754	17611.9	0.0579947	0.769202	0.0484535	0.856079	0.0305571	0.880345	0.0400983	1	0.0234828	0.933722	0.0897984	0.656723	0.0489882	0.911089	-0.0173275	0.999179	0.159971	0.101512	-0.0341921	0.956464
ARHGAP31-AS1	NR_046748	142.821	0.522318	0.0205852	0.125416	0.797534	0.127577	0.677169	0.524478	0.0217067	0.200425	0.551905	-0.0792308	0.876259	-0.234892	0.593254	0.0447639	0.999179	0.105568	0.622965	-0.321711	0.699972
ARHGAP32	NM_001142685	10.2776	-1.14414	NA	-0.245169	NA	0.478527	NA	-0.420445	1	0.920084	NA	1.57696	NA	0.0774517	NA	-0.579422	0.941168	-2.27509	0.00142621	2.06438	NA
ARHGAP33	NM_001366178	1661.74	0.106408	0.805269	0.0599245	0.926156	-0.151833	0.677169	-0.10535	1	0.164594	0.717707	0.190024	0.666022	0.071482	0.945426	0.0460527	0.999179	-0.615531	0.00190097	0.0585313	0.966235
ARHGAP35	NM_004491	15849.7	-0.0214631	0.900144	0.0254468	0.91297	-0.0925618	0.416091	-0.139472	0.365753	-0.0422226	0.81935	0.0238968	0.914141	-0.0462048	0.879359	-0.112324	0.585863	-0.00205509	0.984468	-0.0204422	0.966582
ARHGAP36	NM_001282607	0.576883	-0.104759	NA	-2.47776	NA	0.380698	NA	2.75361	NA	1.5418	NA	0	NA	0.48805	NA	2.20587	NA	-2.48476	NA	1.64709	NA
ARHGAP39	NM_001308208	44.9503	-0.453316	0.4678	-0.419963	0.562176	-0.188489	0.795059	-0.221842	1	-0.411402	0.50103	-0.595741	NA	-0.069384	NA	0.114955	0.999179	0.359068	0.336448	0.0419426	0.98757
ARHGAP4	NM_001666	15907.4	0.109096	0.624037	0.129355	0.599488	-0.00786776	0.979386	-0.0281271	1	0.0557625	0.857617	0.177775	0.36957	0.108486	0.774379	-0.0135261	0.999179	-0.33103	0.00373352	-0.0529824	0.940508
ARHGAP40	NM_001164431	18.225	-0.442649	0.698152	-0.664888	NA	0.110528	NA	0.332767	1	-0.255336	0.868757	0.255625	NA	0.849183	NA	0.338222	0.99388	-0.220993	0.746253	0.187369	0.961295
ARHGAP42	NM_152432	492.851	-0.154044	0.441778	-0.00873184	0.983553	0.095165	0.638303	-0.0501468	1	0.102999	0.698653	0.172694	0.416455	-0.086435	0.852879	-0.15613	0.744261	-0.841537	1.67e-14	0.257282	0.664467
ARHGAP44	NM_001321166	4230.46	-0.0148372	0.987307	0.421902	0.552905	0.335309	0.574451	-0.101429	1	-0.0540143	0.961056	0.279755	0.730309	0.276865	0.82814	-0.0569044	0.999179	-2.22555	7.54e-12	-0.0388782	0.98967
ARHGAP45	NM_012292	34665.1	-0.0216311	0.86205	-0.101513	0.248596	-0.0975117	0.215208	-0.0176299	1	-0.137963	0.0558864	-0.14309	0.0548996	-0.0550448	0.748088	-0.0499175	0.928359	-0.402246	3.08e-15	-0.116041	0.673243
ARHGAP5	NM_001030055	3779.73	0.335872	0.46951	-0.0961398	0.906172	0.113184	0.834643	0.545196	0.27089	0.448641	0.268503	-0.0150751	0.986672	-0.162391	0.88212	0.301325	0.811378	2.4878	2.95e-25	0.112958	0.945064
ARHGAP5-AS1	NR_027263	34.2567	0.289889	0.787255	-0.91433	0.40979	-1.11736	0.165443	0.0868607	1	-0.02219	0.98217	-0.287482	NA	-0.408954	NA	-0.143662	0.999179	3.07868	1.12e-14	-0.311799	0.888668
ARHGAP6	NM_001287242	978.937	-0.467462	0.0961462	-0.0633773	0.916239	0.403229	0.134341	-0.000856061	1	0.00454712	0.99289	0.13485	0.683179	-0.0198893	0.983772	-0.150192	0.890405	3.89181	6.11e-139	0.472301	0.594643
ARHGAP8	NM_181335	4.75758	1.07563	NA	0.923665	NA	-0.489489	NA	-0.337522	NA	-0.319563	NA	0.0821923	NA	-0.832659	NA	-1.23441	NA	0.82421	0.480109	-1.39446	NA
ARHGAP9	NM_001080156	8719.08	-0.0405857	0.794794	-0.0868237	0.567795	-0.180579	0.0561333	-0.134341	0.431598	-0.154604	0.144937	-0.139751	0.227398	-0.119995	0.431545	-0.134848	0.418359	-0.759213	3.43e-29	-0.113682	0.740235
ARHGDIA	NM_004309	102751	0.119018	0.326753	0.00637945	0.980018	-0.0647544	0.608757	0.0478837	1	0.0102723	0.96267	-0.0308001	0.881822	0.0159191	0.971351	0.0569916	0.968587	-0.451909	1.96e-11	-0.108408	0.748799
ARHGDIB	NM_001175	115454	0.0673623	0.72328	0.200916	0.133885	0.0810739	0.617223	-0.0524803	1	-0.0106913	0.97052	0.15261	0.321347	0.09505	0.735287	-0.068251	0.980641	-0.761962	3.82e-19	-0.077667	0.868336
ARHGDIG	NM_001176	2.75853	0.925727	NA	2.12983	NA	-0.308314	NA	-1.51241	NA	0.822082	NA	0.129212	NA	-0.262317	NA	0.430551	NA	2.202	0.208437	-0.103415	NA
ARHGEF1	NM_004706	23955.3	0.0533059	0.642499	0.0670852	0.590047	-0.0132017	0.923075	-0.026981	1	-0.04072	0.770987	0.0255146	0.879811	0.0717313	0.649248	0.00549662	0.999179	-0.140612	0.0179509	-0.0937039	0.734969
ARHGEF10	NM_001308152	98.393	0.15289	0.7917	0.131763	0.867105	-0.247051	0.607075	-0.225923	0.999587	0.238379	0.644938	-0.0319501	0.973184	-0.0814147	0.950119	0.188914	0.976743	0.877331	0.000675887	0.0858023	0.961854
ARHGEF10L	NM_001319838	22.3025	-1.16914	0.20892	-0.227894	NA	1.20977	0.133804	0.268527	1	-0.448008	0.652734	-0.438049	NA	0.125013	NA	0.115054	0.999179	1.26055	0.0125441	0.721294	0.772051
ARHGEF11	NM_198236	2701.64	0.392149	0.0520104	-0.0223626	0.963725	-0.210352	0.353767	0.20416	0.749888	0.303046	0.166473	-0.13844	0.678167	-0.144992	0.76422	0.296494	0.33155	-0.995393	1.17e-12	-0.0888688	0.919979
ARHGEF12	NM_001198665	13290.3	-0.0490227	0.76076	0.0807008	0.633304	0.0426611	0.776677	-0.0870623	0.881161	0.1112	0.399999	0.131463	0.298748	-0.0134535	0.979885	-0.0337164	0.999179	-0.0847947	0.31929	0.16051	0.673243
ARHGEF15	NM_025014	0.159197	0	NA	0.936452	NA	0	NA	-0.989585	NA	-0.138356	NA	-1.13776	NA	0.158073	NA	1.15732	NA	0.929215	NA	-0.0749995	NA
ARHGEF16	NM_014448	0.84004	-2.93834	NA	-2.90083	NA	0	NA	0	NA	2.02866	NA	2.01315	NA	0.43019	NA	0.445694	NA	-1.9457	NA	4.96699	NA
ARHGEF17	NM_014786	4933.6	-0.112548	0.712402	0.323854	0.134078	0.241744	0.268182	-0.194658	0.783007	-0.183184	0.515534	0.385657	0.0613051	0.395852	0.0667033	-0.172989	0.825178	-2.14505	2.08e-55	-0.0703245	0.938589
ARHGEF18	NM_001367824	15995.5	0.0258271	0.875372	0.135254	0.229961	0.116703	0.265028	0.00727572	1	-0.0290388	0.886048	0.148819	0.161876	0.183929	0.0737996	0.00607178	0.999179	-0.16388	0.0234396	-0.0545613	0.886355
ARHGEF19	NM_153213	429.591	-0.098369	0.707714	-0.209886	0.347868	-0.139367	0.51623	-0.0278501	1	-0.346331	0.0244577	-0.215528	0.273985	0.171275	0.564027	0.0404721	0.999179	0.557284	2.96e-06	-0.247666	0.680872
ARHGEF2	NM_001162383	26422.9	-0.097655	0.441928	0.0245071	0.914314	-0.0697238	0.574787	-0.191886	0.0687177	-0.137957	0.199497	-0.0998227	0.444694	-0.0815984	0.692189	-0.119733	0.515245	0.12538	0.0968034	-0.0399822	0.925947
ARHGEF25	NM_182947	234.58	-0.224576	0.316436	-0.140854	0.629783	-0.0961795	0.699329	-0.179902	0.76807	0.0921494	0.825723	-0.0681522	0.88396	-0.178258	0.711515	-0.017956	0.999179	-1.70959	1.49e-35	0.317011	0.673243
ARHGEF26	NM_015595	5.59818	0.916031	NA	0.90856	NA	-0.260563	NA	-0.253093	NA	-0.0317875	NA	-0.667103	NA	-0.399373	NA	0.235942	NA	1.54187	0.107905	-0.947572	NA
ARHGEF26-AS1	NR_037901	0.139979	0	NA	0.936467	NA	0	NA	-0.989569	NA	0	NA	0	NA	2.20759	NA	2.2452	NA	-0.0325514	NA	-0.0749904	NA
ARHGEF28	NM_001177693	67.9986	0.0879502	0.943691	0.153776	0.921944	-0.0978087	0.933622	-0.163634	1	-0.231814	0.849702	-0.173173	0.89507	0.0641484	0.983361	0.0055071	0.999686	1.76186	0.000123002	-0.319642	0.901512
ARHGEF3	NM_019555	2809.11	0.502532	1.1e-14	0.110963	0.352245	0.313636	4.44e-06	0.705206	2.53e-30	0.549448	1.46e-22	0.145986	0.0779646	0.160259	0.0482147	0.563721	4.86e-24	1.65523	6.05e-175	0.0471898	0.890883
ARHGEF33	NM_001145451	15.0478	-0.172518	NA	-0.453625	NA	-0.139428	NA	0.141679	1	0.516502	NA	0.303338	NA	-0.17541	NA	0.0377533	0.999179	-0.306088	0.627501	0.689416	0.77759
ARHGEF34P	NR_033942_dup1	362.326	-0.0532839	0.900732	0.134378	0.777273	0.0987818	0.781036	-0.0888796	1	-0.071747	0.893078	0.392128	0.145583	0.263232	0.539905	-0.200642	0.847737	-0.472057	0.0101314	-0.0180288	0.991416
ARHGEF35	NM_001003702	217.758	-0.276665	0.460059	0.0953549	0.87769	0.199559	0.58553	-0.172461	0.999517	0.0721613	0.910319	0.345941	0.331899	0.239689	0.693276	-0.0340913	0.999179	-0.4879	0.0241108	0.349158	0.725531
ARHGEF37	NM_001001669	181.006	-0.647105	0.0327436	0.374603	0.332375	0.568994	0.0555666	-0.452714	0.319779	-0.385672	0.389051	-0.323724	0.518041	0.278744	0.725895	0.216795	0.961015	-1.84552	3.43e-16	0.261679	0.824765
ARHGEF38	NM_001242729	9.92352	-1.10843	NA	-0.333239	NA	-0.259121	NA	-1.03431	0.946523	1.32274	NA	0.796762	NA	-0.411779	NA	0.114199	0.999179	1.52308	0.0339616	2.43137	NA
ARHGEF38-IT1	NR_046840	0	NA	NA	NA	NA	NA	NA	NA	NA	NA	NA	NA	NA	NA	NA	NA	NA	NA	NA	NA	NA
ARHGEF39	NM_032818	2663.12	0.0245651	0.920867	0.178349	0.267782	0.0732211	0.685208	-0.0805626	1	0.00736873	0.982625	0.211723	0.152061	0.0739064	0.844952	-0.130448	0.738093	-0.600748	1.31e-10	-0.0168024	0.980108
ARHGEF3-AS1	NR_046572	0	NA	NA	NA	NA	NA	NA	NA	NA	NA	NA	NA	NA	NA	NA	NA	NA	NA	NA	NA	NA
ARHGEF4	NM_001367493	7.06435	0.190882	NA	-0.499714	NA	-1.29389	NA	-0.603297	NA	-0.512271	NA	-0.0330868	NA	-0.153387	NA	-0.63257	NA	-0.697959	0.370491	-0.702841	NA
ARHGEF40	NM_018071	45.7316	-0.407383	0.683755	0.0275566	0.988302	-0.0727882	0.955562	-0.507727	0.933994	-0.518505	0.480789	-0.0759779	NA	-0.0739724	NA	-0.516499	0.765871	2.21203	1.78e-07	-0.111186	0.971389
ARHGEF5	NM_005435	1296.81	-0.000686592	0.997762	0.109625	0.642455	0.0370249	0.871531	-0.0732869	1	-0.188339	0.274995	0.101379	0.670423	0.26939	0.0974286	-0.0203288	0.999179	-0.688751	7.92e-12	-0.187302	0.710989
ARHGEF6	NM_004840	8714.05	-0.0192862	0.89047	0.101526	0.321559	0.0948602	0.290166	-0.0259523	1	0.165037	0.0313872	0.157944	0.0532999	-0.0113472	0.977919	-0.00425431	0.999179	-0.184527	0.0019323	0.184647	0.518966
ARHGEF7	NM_001354052	18520.6	-0.0806979	0.110653	0.0457422	0.503094	0.00165024	0.985505	-0.12479	0.00272442	-0.114888	0.00465193	-0.00859869	0.937881	-0.0393357	0.692105	-0.145625	0.000186916	0.195901	2.04e-09	-0.0338697	0.841119
ARHGEF7-AS1	NR_046516	0.0376691	0	NA	0	NA	0	NA	0	NA	0	NA	0.785695	NA	0	NA	-0.766036	NA	-0.0323041	NA	-0.0753984	NA
ARHGEF7-AS2	NR_046667	0.0977563	1.42881	NA	0	NA	-1.48186	NA	0	NA	0	NA	0	NA	1.11972	NA	1.15734	NA	-0.0325696	NA	-1.5669	NA
ARHGEF9	NM_015185	4177.1	0.014301	0.943432	0.0858678	0.617904	0.000489799	0.998336	-0.071077	0.976684	0.0198251	0.933867	0.125268	0.352339	-0.00284915	0.994705	-0.108292	0.696591	0.0263265	0.789589	0.00587747	0.99346
ARHGEF9-IT1	NR_138419	0.508659	0.88569	NA	0.936496	NA	0.777178	NA	0.726369	NA	-1.49062	NA	-1.49753	NA	-1.68663	NA	-1.67972	NA	3.16495	NA	-2.37649	NA
ARID1A	NM_006015	46222.1	0.0852241	0.566365	0.0422651	0.850192	-0.106178	0.382545	-0.0632194	1	-0.0458968	0.819824	-0.0171046	0.949735	-0.0682273	0.80043	-0.0970194	0.783237	-0.191594	0.0156683	-0.130784	0.719138
ARID1B	NM_001363725	19535.3	-0.064987	0.606327	0.0449148	0.801086	0.000912113	0.99513	-0.10899	0.548359	-0.0643345	0.636081	0.0749409	0.570738	-0.0455137	0.863504	-0.184789	0.0447406	-0.201394	0.00186173	0.000967192	0.999057
ARID2	NM_001347839	4834.06	0.0502026	0.768161	-0.0893211	0.604756	-0.163114	0.139657	-0.02359	1	0.068886	0.699821	0.0651562	0.729073	-0.127641	0.454257	-0.123911	0.598788	-0.49071	7.93e-11	0.0190131	0.971992
ARID3A	NM_005224	31605.6	0.160708	0.125674	0.011614	0.959363	-0.0504877	0.702643	0.0986068	0.74167	0.0349375	0.855523	-0.0791519	0.584362	-0.0208581	0.960238	0.0932313	0.74008	0.25364	0.000251979	-0.12547	0.708428
ARID3B	NM_006465	13839.4	0.157041	0.318604	0.0024448	0.995045	-0.128253	0.371701	0.0263438	1	0.143289	0.359196	0.120107	0.495507	0.0448188	0.920237	0.0680012	0.983693	0.365665	4.83e-05	-0.0133824	0.985352
ARID3C	NM_001017363	6.98014	0.0267871	NA	-0.0777214	NA	-0.397765	NA	-0.293257	NA	-0.839392	NA	0.0772551	NA	1.10165	NA	0.185005	NA	-0.793395	0.288813	-0.865756	NA
ARID4A	NM_002892	3537.85	-0.230911	0.094254	0.000538933	0.999173	0.0820016	0.632672	-0.149448	0.623384	-0.0928055	0.642134	-0.0592292	0.806076	-0.0530481	0.903431	-0.0866245	0.932046	0.0219002	0.858045	0.138364	0.759457
ARID4B	NM_016374	6757.06	0.012833	0.966706	-0.074201	0.80918	-0.0126473	0.964136	0.0743868	1	0.217413	0.191141	-0.0778935	0.778101	-0.18339	0.420089	0.111916	0.894645	0.0115753	0.937345	0.204833	0.699972
ARID5A	NM_212481	26510.4	0.233956	0.167329	0.0678843	0.825391	0.0434836	0.852454	0.209556	0.3929	0.240534	0.123368	-0.141542	0.503002	-0.0621513	0.902812	0.319925	0.0361807	-0.724708	2.9e-12	0.00689751	0.995055
ARID5B	NM_001244638	5198.84	0.201966	0.255052	0.341113	0.0107901	0.441968	0.000238589	0.302822	0.0464206	0.269051	0.0591015	0.300139	0.0350096	0.196153	0.325018	0.165065	0.599301	0.778878	1.67e-14	0.0674073	0.914091
ARIH1	NM_005744	11112.9	-0.0452363	0.841762	-0.0296012	0.927878	0.0854629	0.637251	0.0698278	1	0.134516	0.459002	-0.0188615	0.959153	-0.102269	0.747887	0.0511083	0.999179	0.0989597	0.388409	0.179992	0.707743
ARIH2	NM_001317333	12094.9	0.107327	0.0889075	-0.0501754	0.596432	-0.121754	0.0276012	0.0357486	1	0.028584	0.792136	-0.00960358	0.949887	-0.0276509	0.883766	0.0105367	0.999179	-0.00848685	0.880916	-0.0784128	0.707189
ARIH2OS	NR_161301	116.478	0.22351	0.539008	0.230951	0.571782	-0.193231	0.5614	-0.200671	0.928205	-0.194699	0.577198	-0.301333	0.310959	0.126353	0.857415	0.232986	0.746283	0.766047	2.52e-05	-0.417826	0.661336
ARL1	NM_001177	6254.47	-0.0573207	0.602442	0.0381199	0.808144	0.068459	0.459907	-0.0269815	1	-0.0459588	0.718856	-0.0074183	0.972473	0.0762681	0.580802	0.0377277	0.989185	0.542832	6.8e-25	0.0116432	0.975948
ARL10	NM_173664	2133.12	-0.00304187	0.990239	0.0101577	0.973873	-0.0733359	0.675058	-0.0865354	0.976684	-0.0438689	0.867609	0.0216318	0.946996	0.0353279	0.942594	-0.0301728	0.999179	0.014365	0.908279	-0.0404907	0.947214
ARL11	NM_138450	1195.82	-0.0973156	0.31444	-0.0375825	0.811863	-0.0383595	0.724451	-0.0980926	0.520226	-0.0440343	0.781515	0.014179	0.949735	-0.0374912	0.901489	-0.0957045	0.643899	-1.05781	1.87e-78	0.0535864	0.864903
ARL13A	NR_103709	0.55715	0.223382	NA	-0.658714	NA	-2.70963	NA	-1.82758	NA	-0.138433	NA	1.31741	NA	-0.803776	NA	-2.25955	NA	-1.50438	NA	-0.360333	NA
ARL13B	NM_001174150	1560.73	0.0547425	0.704886	-0.15912	0.121001	-0.183625	0.0409081	0.030238	1	0.132796	0.225042	-0.0981987	0.458525	-0.151418	0.202756	0.0795767	0.850549	-0.367526	6.19e-08	0.0783187	0.817626
ARL14	NM_025047	14.4026	-0.799425	NA	0.194561	NA	0.511678	NA	-0.482308	0.938707	-0.346738	NA	-1.1762	NA	-1.64355	NA	-0.814097	0.996976	-3.48978	4.05e-07	0.453172	0.918052
ARL14EP	NM_152316	3960.89	-0.14422	0.171212	-0.0260174	0.904456	0.0812917	0.464512	-0.0369109	1	0.0110892	0.959827	-0.0127321	0.959219	-0.0662279	0.76654	-0.0424066	0.9939	-0.239433	0.000364588	0.15559	0.660423
ARL14EPL	NM_001195581	1.23897	2.7686	NA	1.4849	NA	-1.61114	NA	-0.32748	NA	-1.10024	NA	-0.176072	NA	1.11976	NA	0.195626	NA	-0.921308	0.82062	-3.86723	NA
ARL15	NM_019087	361.764	-0.265419	0.442291	-0.0281822	0.965014	0.164661	0.637381	-0.0725753	1	-0.0146853	0.982255	-0.0372699	0.958397	-0.00831762	0.993463	0.014267	0.999179	-0.434449	0.0306378	0.250948	0.786634
ARL16	NM_001040025	2073.01	-0.0925034	0.399784	0.0278868	0.882533	0.0644511	0.547583	-0.0559392	0.977148	-0.06216	0.620801	-0.019763	0.917488	0.0340885	0.903431	-0.00830849	0.999179	0.185851	0.00265598	0.0306343	0.934846
ARL17A	NM_001113738_dup1	737.925	0.119415	0.691726	0.0565839	0.904266	0.0053478	0.988998	0.0681789	1	0.32098	0.109788	0.321255	0.127645	-0.014772	0.986411	-0.0150465	0.999179	0.527786	0.000234222	0.20195	0.766648
ARL17B	NM_001103154_dup1	87.7372	-0.025736	0.967568	0.290106	0.532479	0.0597458	0.911123	-0.256096	0.89321	0.0914385	0.906091	-0.0546924	0.953601	0.119903	0.923066	0.266034	0.888079	-1.05683	1.12e-05	0.117545	0.938122
ARL2	NM_001667	7461.02	0.0195358	0.918825	0.0287244	0.905773	0.0753337	0.571874	0.0661451	0.991253	-0.0111987	0.962425	0.0506211	0.790562	0.0772089	0.748942	0.0153891	0.999179	0.0956709	0.259896	-0.0303814	0.951148
ARL2BP	NM_012106	5041.67	-0.0780033	0.526201	0.0898211	0.483331	0.137259	0.133058	-0.030565	1	-0.122359	0.237565	0.13126	0.206035	0.2541	0.00167462	0.000481148	0.999686	-0.443857	1.26e-12	-0.0440849	0.905323
ARL2-SNX15	NR_037650	6351.15	-0.0275122	0.835071	0.00730483	0.970175	0.0320698	0.787009	-0.00274728	1	-0.0437449	0.755645	0.0252331	0.88245	0.0582186	0.760746	-0.0107594	0.999179	-0.0382726	0.585921	-0.0158957	0.968493
ARL3	NM_004311	3127.03	-0.134691	0.296209	0.15061	0.207784	0.30084	0.000491007	0.0155387	1	-0.0813457	0.588232	0.0729306	0.65789	0.0974962	0.618676	-0.0567802	0.978368	0.466814	9.2e-11	0.0536243	0.899136
ARL4A	NM_001037164	230.003	-0.178321	0.531762	0.209639	0.462342	0.178722	0.471647	-0.209238	0.728446	-0.104544	0.753473	0.0798441	0.8247	0.289387	0.219128	0.104999	0.977057	0.52226	0.00026614	0.074002	0.933595
ARL4C	NM_005737	1752.92	-0.329572	0.235193	0.58534	0.00414138	0.907412	5.34e-07	-0.00749945	1	-0.357291	0.155578	0.289976	0.314643	0.460508	0.0619283	-0.186759	0.859041	-0.572392	0.000731809	-0.0274745	0.982867
ARL4D	NM_001661	91.4863	-0.142472	0.780829	0.070969	0.926156	-0.00871197	0.988987	-0.222153	0.966786	-0.203647	0.716041	0.207824	0.704566	0.366265	0.509658	-0.0452058	0.999179	-0.340647	0.19297	-0.0609151	0.970853
ARL5A	NM_012097	12387.5	-0.304479	0.315263	0.0359373	0.949758	0.291271	0.272576	-0.0491451	1	0.0520242	0.922363	0.0544336	0.923122	-0.0616312	0.946896	-0.0640406	0.999179	-0.120373	0.568513	0.356716	0.68087
ARL5B	NM_178815	4128.69	0.0921405	0.861521	-0.137101	0.830982	0.0400734	0.943767	0.269315	0.867327	0.617296	0.0379222	-0.00997618	0.990048	-0.29032	0.634396	0.336953	0.643899	0.27319	0.286536	0.525343	0.660423
ARL5C	NM_001143968	0.610239	2.73735	NA	2.07004	NA	-1.08977	NA	-0.422505	NA	1.51436	NA	2.72211	NA	-0.533066	NA	-1.74072	NA	-0.0324198	NA	-1.22172	NA
ARL6	NR_136601	241.425	-0.194292	0.33151	-0.16097	0.479319	-0.0998342	0.644851	-0.133155	0.900811	0.0751664	0.783821	-0.0861625	0.752532	-0.0254043	0.970699	0.135925	0.798581	0.0471813	0.740749	0.269721	0.650725
ARL6IP1	NM_015161	17117.3	-0.160397	0.243624	0.109208	0.518971	0.220302	0.041004	-0.0493027	1	-0.0552255	0.789924	0.0253334	0.923721	0.0345474	0.933854	-0.0460115	0.999179	0.103869	0.266972	0.105414	0.794026
ARL6IP4	NM_001278379	13655.2	-0.0108493	0.943964	0.061082	0.659458	0.101281	0.256853	0.0293499	1	-0.01714	0.924532	0.0663843	0.594174	0.105269	0.373227	0.0217447	0.999179	0.0486036	0.4876	-0.00595595	0.991473
ARL6IP5	NM_006407	16695.7	-0.0936514	0.553476	0.0719669	0.731333	0.151051	0.211676	-0.014567	1	0.00488114	0.986756	-0.0743162	0.695462	-0.0367784	0.928726	0.0424189	0.999179	-0.135189	0.131343	0.0988045	0.80363
ARL6IP6	NR_146430	2015.04	-0.114549	0.536692	-0.118457	0.567509	0.0347821	0.871941	0.0386903	1	0.0429907	0.877642	-0.134364	0.46807	-0.144851	0.535211	0.0325039	0.999179	-0.345999	0.000398256	0.157817	0.738545
ARL8A	NM_138795	4066.46	0.0674713	0.595683	-0.0648636	0.67431	-0.0785599	0.46572	0.053775	1	-0.0617918	0.653109	-0.141716	0.140843	-0.0188785	0.962309	0.061046	0.923469	0.54804	4.08e-19	-0.128966	0.683854
ARL8B	NM_018184	11992.4	-0.228581	0.414695	0.0457161	0.929406	0.306554	0.173085	0.0322571	1	-0.0135231	0.979791	-0.0652845	0.886216	-0.0318912	0.976539	0.0198702	0.999179	0.11753	0.527588	0.21522	0.773195
ARL9	NM_001363794	6.58262	0.309846	NA	-0.0462793	NA	0.238271	NA	0.594396	NA	-0.762787	NA	-0.355455	NA	1.02755	NA	0.620221	NA	-0.253247	0.78271	-1.07236	NA
ARLNC1	NR_131948	369.657	-0.0647632	0.828435	0.153308	0.592264	0.221113	0.263241	0.00304208	1	0.385941	0.564773	-0.0764649	0.952991	-0.409484	0.672858	0.0529213	0.999179	-5.59455	1.67e-107	0.451091	0.713338
ARMC1	NM_018120	6237.8	-0.217632	0.321207	0.0039919	0.993605	0.187765	0.342347	-0.0338598	1	-0.00743493	0.986844	0.0683617	0.841903	-0.013568	0.986334	-0.0893646	0.989185	-0.1274	0.384372	0.21043	0.73202
ARMC10	NM_031905	2639.24	-0.151541	0.213657	-0.0505124	0.811372	0.0577831	0.681899	-0.0432455	1	-0.0389368	0.851435	-0.0882277	0.567862	-0.13698	0.350335	-0.0876886	0.834906	-0.151032	0.0590022	0.112883	0.75603
ARMC12	NM_145028	61.6413	-0.370455	0.543082	-0.396981	0.556288	-0.0537387	0.948879	-0.0272122	1	0.146427	0.853049	-0.300472	0.637129	-0.473848	0.451608	-0.0269491	0.999179	0.721659	0.0211521	0.517096	0.719138
ARMC2	NM_032131	27.044	0.112632	0.886502	-0.0372397	NA	0.388694	0.453491	0.538566	0.564394	0.200876	0.834202	0.304589	NA	0.619339	NA	0.515626	0.594463	-0.50679	0.195649	0.0885197	0.970767
ARMC2-AS1	NR_104137	0	NA	NA	NA	NA	NA	NA	NA	NA	NA	NA	NA	NA	NA	NA	NA	NA	NA	NA	NA	NA
ARMC3	NM_001282746	0.968652	-2.5833	NA	-0.514255	NA	0	NA	-2.0594	NA	0.427727	NA	-1.51588	NA	-1.08157	NA	0.861991	NA	0.64508	NA	3.01064	NA
ARMC4	NM_001290021	0.639464	0	NA	0	NA	0.971345	NA	0.93384	NA	-0.577657	NA	0.330827	NA	-0.510633	NA	-1.41907	NA	2.86247	NA	-0.514866	NA
ARMC4P1	NR_138082	3.65652	-2.17007	NA	-0.678766	NA	-0.867139	NA	-2.35844	NA	-0.449551	NA	-0.00459508	NA	0.320942	NA	-0.124013	NA	-0.101473	0.932682	1.7202	NA
ARMC5	NM_001288767	3462.83	0.0956511	0.476892	-0.243146	0.00812693	-0.203079	0.0309627	0.135718	0.457312	-0.0601033	0.726411	-0.278613	0.00185375	-0.110311	0.523924	0.108199	0.662398	-0.158101	0.0411022	-0.155474	0.673243
ARMC6	NM_001199196	7983.73	0.0598886	0.689161	-0.0953853	0.519255	-0.146548	0.156259	0.00872583	1	-0.0817804	0.575193	-0.0209521	0.927374	0.0429961	0.897221	-0.0178323	0.999179	-0.166139	0.0278249	-0.141339	0.694275
ARMC7	NM_001304272	812.619	0.111905	0.630924	-0.100951	0.738267	-0.207784	0.230603	0.00507213	1	-0.187261	0.345783	-0.105669	0.693249	0.00512885	0.993316	-0.0764624	0.993148	0.0898061	0.51749	-0.298847	0.626998
ARMC8	NM_015396	4771.13	-0.0292698	0.80015	-0.0409994	0.774684	-0.0159765	0.894349	-0.0042469	1	0.148624	0.028411	-0.0348683	0.792751	-0.12768	0.116661	0.055813	0.879688	0.091339	0.110019	0.178188	0.438298
ARMC9	NM_025139	1202.05	-0.0715494	0.789741	0.121578	0.675012	0.0711199	0.77222	-0.122007	0.950876	-0.117011	0.673508	0.108901	0.710208	0.122037	0.774379	-0.103875	0.965116	-0.872061	2.57e-13	-0.0451608	0.957662
ARMCX1	NM_016608	191.461	-0.600732	0.343256	0.0059267	0.996666	0.543434	0.336379	-0.0632236	1	-0.083466	0.920262	0.0506838	0.959294	0.0106556	0.994705	-0.123494	0.999179	3.40997	7.82e-31	0.517302	0.7388
ARMCX2	NM_177949	1917.69	-0.163971	0.397504	-0.208687	0.242251	-0.154591	0.369638	-0.109875	0.948395	0.0515411	0.855523	-0.0708885	0.786367	-0.129461	0.643517	-0.00703115	0.999179	1.66992	2.14e-64	0.215756	0.679225
ARMCX3	NM_016607	5659.22	-0.206664	0.241433	-0.131963	0.557891	0.0209649	0.936238	-0.0537357	1	-0.057394	0.840721	-0.145034	0.46518	-0.110721	0.741415	-0.023081	0.999179	0.980169	1.87e-22	0.149498	0.766648
ARMCX4	NM_001256155	347.605	0.05806	0.857572	0.0294984	0.948151	0.0170841	0.961404	0.0456457	1	-0.0432114	0.917962	-0.141283	0.64031	-0.00546173	0.994553	0.0926098	0.989185	0.111025	0.499159	-0.100997	0.896947
ARMCX5	NM_001168478	1646.1	-0.151574	0.10653	-0.0523664	0.750407	0.0450086	0.709699	-0.0541991	0.994992	-0.0998535	0.349412	-0.029762	0.868601	0.0122056	0.977919	-0.0578859	0.930999	0.0297233	0.703693	0.0520014	0.877173
ARMCX5-GPRASP2	NR_146584	675.578	0.0647954	0.770208	-0.0474487	0.879444	-0.139952	0.38656	-0.0277078	1	0.100151	0.638036	0.123336	0.541823	-0.0134036	0.983772	-0.0365888	0.999179	0.0740727	0.541123	0.0356669	0.959085
ARMCX6	NR_033669	1445.48	0.00743465	0.978009	-0.109798	0.599157	-0.0288187	0.894118	0.0884137	0.974931	0.0484617	0.850312	0.0472292	0.855926	0.00668915	0.989359	0.00792171	0.999179	0.377499	4.95e-05	0.041395	0.945344
ARMH1	NM_001145636	660.124	0.660985	2.77e-07	0.258026	0.178674	-0.0409067	0.878367	0.362052	0.0310679	0.692151	5.25e-08	0.174138	0.447697	-0.00247857	0.998004	0.515535	0.000222732	-0.0165459	0.920239	0.0314927	0.970536
ARMH2	NM_001282492	5.4698	0.320324	NA	0.925426	NA	0.70748	NA	0.102381	NA	2.00611	NA	2.28901	NA	0.359428	NA	0.0765302	NA	-1.42713	0.307863	1.68608	NA
ARMH3	NM_024541	7715.99	-0.0259194	0.847425	0.0693696	0.585018	0.0507404	0.634946	-0.0445486	1	-0.0462357	0.736438	0.151014	0.0638743	0.103159	0.369966	-0.0940914	0.561653	0.414123	1.18e-13	-0.0199994	0.960972
ARMH4	NM_001320173	2.7576	-1.36849	NA	-1.30931	NA	1.18272	NA	1.12354	NA	-0.820745	NA	-0.483089	NA	0.149494	NA	-0.18816	NA	-0.162414	0.915498	0.547356	NA
ARMS2	NM_001099667	0.0753383	0	NA	0	NA	0	NA	0	NA	0	NA	1.68225	NA	0	NA	-1.66248	NA	-0.0322394	NA	-0.0754954	NA
ARMT1	NM_024573	3979.07	-0.165248	0.392554	-0.00502451	0.990549	0.121744	0.507433	-0.0384793	1	0.0375194	0.910204	0.00833501	0.983701	-0.0376153	0.947668	-0.00843095	0.999179	-0.186811	0.111773	0.20303	0.699972
ARNT	NM_001668	10214.2	0.132216	0.0180314	0.0700442	0.369685	0.0674063	0.304521	0.129578	0.0284867	0.0394336	0.672553	0.00792611	0.959294	0.0394088	0.784686	0.0709163	0.535437	0.360718	1.38e-18	-0.0924878	0.673243
ARNT2	NM_014862	17.11	-0.254716	0.797487	-0.46187	NA	-0.553473	NA	-0.346319	1	-0.464034	0.577057	0.0623513	NA	0.231878	NA	-0.294507	0.985307	0.58951	0.212404	-0.208899	0.938589
ARNTL	NM_001351814	1730.48	-0.00757511	0.974453	-0.0439679	0.857649	-0.0671847	0.662943	-0.0307919	1	-0.0360426	0.878861	0.0200795	0.942189	0.0087328	0.986398	-0.0473893	0.996976	0.0225824	0.833259	-0.0281403	0.96138
ARNTL2	NM_020183	13546.7	0.191328	0.0377905	-0.0722719	0.640873	-0.0121789	0.943289	0.251421	0.00237701	0.385123	4.58e-08	0.00324355	0.989185	-0.0907831	0.60161	0.291097	0.000183673	0.351827	9.31e-08	0.194078	0.579255
ARNTL2-AS1	NR_109975	3.0152	-0.444619	NA	-0.0708503	NA	1.14671	NA	0.772941	NA	0.779692	NA	0.411039	NA	0.116645	NA	0.485297	NA	-0.498555	0.75812	1.22485	NA
ARPC1A	NM_006409	9172.03	0.0635694	0.540975	0.0597978	0.624901	0.0102977	0.939327	0.0140693	1	-0.0470804	0.699828	-0.0157429	0.926486	0.0463363	0.812285	0.0149988	0.999179	0.455184	7.81e-19	-0.110349	0.679225
ARPC1B	NM_005720	77570.9	-0.0153912	0.938222	0.114373	0.421556	0.124207	0.275157	-0.00555729	1	-0.00749643	0.97545	0.127362	0.323805	0.151121	0.258928	0.016263	0.999179	0.00627766	0.952147	0.00824662	0.98991
ARPC2	NM_152862	109388	0.0349909	0.749319	0.194614	0.00137742	0.184648	0.00239602	0.0250252	1	0.0826726	0.344264	0.152767	0.0252524	0.122352	0.132008	0.0522572	0.898413	0.062838	0.278893	0.0480157	0.854023
ARPC3	NM_001278556	29637.6	-0.0524251	0.639614	0.0843319	0.424784	0.163279	0.0205759	0.0265217	1	0.0841732	0.391126	0.00769989	0.97221	0.023612	0.932786	0.100085	0.462973	-0.183507	0.00112214	0.13691	0.646574
ARPC4	NM_001024960	38665.2	0.0140298	0.943432	0.184713	0.090088	0.167363	0.11234	-0.00332004	1	0.0325242	0.882704	0.162324	0.16469	0.116427	0.508147	-0.0133732	0.999179	-0.220177	0.00445056	0.0188233	0.971798
ARPC4-TTLL3	NM_001198793	15634.9	0.0230925	0.867016	0.169184	0.029855	0.146039	0.0622983	-5.21e-05	1	0.0411549	0.776636	0.110772	0.248982	0.0128727	0.972611	-0.0567449	0.91818	-0.0841046	0.197197	0.0183472	0.966235
ARPC5	NM_001270439	45678.3	-0.123636	0.597241	0.194614	0.370259	0.347131	0.0220511	0.0288814	1	0.106745	0.691408	0.163297	0.473343	0.115606	0.774397	0.0590538	0.999179	-0.0530794	0.723179	0.23064	0.695125
ARPC5L	NM_030978	19447.2	-0.0678084	0.414695	-0.0568961	0.563457	0.0622612	0.402357	0.0513489	0.911806	-0.0442932	0.658604	-0.0852055	0.264859	0.0106739	0.970699	0.0515861	0.857565	-0.0241801	0.672537	0.0237941	0.933595
ARPIN	NM_001282380	4.42903	-0.0850676	NA	0.598262	NA	-0.280895	NA	-0.964222	NA	0.398528	NA	0.0179124	NA	0.0782252	NA	0.45884	NA	0.662765	0.585589	0.48371	NA
ARPIN-AP3S2	NM_001199058	4699.62	0.0220109	0.831057	0.0191587	0.894863	-0.0128906	0.902338	-0.0100383	1	0.0176811	0.894296	0.0576196	0.512198	0.0246465	0.908327	-0.015292	0.999179	0.238909	5.91e-08	-0.00402552	0.992735
ARPP19	NM_006628	23518.1	-0.121491	0.625173	0.0701554	0.848994	0.169468	0.398674	-0.0221776	1	0.0369063	0.923133	0.0784061	0.808368	-0.0151891	0.984362	-0.0566888	0.999179	-0.0380749	0.813404	0.158621	0.794799
ARPP21	NM_001267617	0.756335	-1.93597	NA	1.36697	NA	0	NA	-3.29324	NA	1.41218	NA	0.687287	NA	0.678707	NA	1.40358	NA	-0.943444	NA	3.348	NA
ARR3	NM_004312	0.995913	0.868605	NA	-2.8745	NA	-1.85163	NA	1.89138	NA	-2.97205	NA	-0.151607	NA	2.04735	NA	-0.773009	NA	-0.0488471	NA	-3.83884	NA
ARRB1	NM_004041	903.628	-0.361049	0.250815	-0.147287	0.771984	-0.171123	0.617844	-0.384885	0.332208	-0.465372	0.0692872	0.0338885	0.959883	-0.0960989	0.916901	-0.595359	0.0180319	0.434895	0.0260041	-0.104034	0.928861
ARRB2	NM_004313	6980.39	0.0213814	0.856984	0.0400683	0.771494	-0.0339079	0.733885	-0.0525948	0.937232	-0.108189	0.161712	-0.0175345	0.914141	-0.0178814	0.948445	-0.108536	0.295716	-0.507572	1.89e-25	-0.129247	0.630628
ARRDC1	NM_152285	2026.17	0.0440306	0.841562	-0.0437401	0.883478	-0.102929	0.537477	-0.0151579	1	-0.0963638	0.64124	-0.137654	0.446236	-0.00627283	0.99057	0.0350172	0.999179	-0.19915	0.0526787	-0.140076	0.762641
ARRDC1-AS1	NR_122035	2149.4	0.101443	0.602484	0.143179	0.457236	-0.0369487	0.864949	-0.0786846	1	-0.00135829	0.997357	0.0705441	0.778165	0.024654	0.966661	-0.0472484	0.999179	0.0116812	0.929949	-0.102417	0.83386
ARRDC2	NM_001025604	1033.31	-0.154395	0.479525	-0.292159	0.0850531	-0.225941	0.194971	-0.088178	1	-0.4329	0.0035607	-0.424223	0.00657186	-0.125037	0.764858	-0.133715	0.881913	-1.14226	2.25e-23	-0.278215	0.661745
ARRDC3	NR_138072	1735.09	-0.559641	0.00861199	0.29171	0.318959	0.567318	0.00568402	-0.284032	0.557244	-0.0209809	0.968397	0.516373	0.0164115	0.405495	0.114287	-0.131859	0.973482	1.21592	3.23e-14	0.538909	0.50158
ARRDC3-AS1	NR_027435	162.201	-0.244942	0.526201	0.0416827	0.949019	0.158559	0.67743	-0.128066	1	0.156427	0.729735	-0.0296849	0.967608	-0.210172	0.725895	-0.02406	0.999179	0.335705	0.118952	0.401625	0.681492
ARRDC4	NM_183376	5.60981	-2.45166	NA	-0.914226	NA	0.0126124	NA	-1.52479	NA	-0.533841	NA	-0.368973	NA	-0.0716794	NA	-0.236547	NA	2.76479	0.00510628	1.91845	NA
ARRDC5	NM_001080523	47.6272	-0.133309	0.899555	0.201199	0.875827	0.232319	0.790425	-0.102189	1	0.303429	0.680072	-0.195136	NA	-0.446352	NA	0.0522131	0.999179	2.10519	2.04e-08	0.437138	0.816967
ARSA	NM_000487	3823.23	0.155995	0.321609	0.150833	0.352978	0.0482537	0.795723	0.0534162	1	0.155231	0.291329	0.183188	0.195631	0.0797181	0.80043	0.0517613	0.996976	0.54473	4.76e-10	-0.000442644	0.999057
ARSB	NM_000046	3064.19	0.152762	0.529906	0.221669	0.318959	0.108555	0.642312	0.0396478	1	0.186476	0.407515	0.291599	0.122771	0.0738991	0.900639	-0.0312241	0.999179	0.591471	2.2e-06	0.0340536	0.969287
ARSD	NM_001669	632.519	-0.0606901	0.74932	0.0124994	0.966076	0.0124136	0.956953	-0.060776	1	0.0552616	0.806255	0.10615	0.545415	0.04204	0.922218	-0.0088489	0.999179	0.049435	0.648343	0.116262	0.783653
ARSD-AS1	NR_144459	0.654434	-0.0487245	NA	1.86209	NA	1.76089	NA	-0.149876	NA	-0.0497339	NA	-0.151412	NA	-1.77662	NA	-1.67494	NA	0.851859	NA	-0.000762556	NA
ARSE	NM_001369079	1.6216	0.890304	NA	0	NA	1.39077	NA	2.30633	NA	1.23419	NA	1.11874	NA	0.323527	NA	0.438969	NA	2.85287	0.244307	0.343705	NA
ARSF	NM_004042	0.0387951	0	NA	0	NA	0	NA	0	NA	0	NA	0.785695	NA	0	NA	-0.766036	NA	-0.0323041	NA	-0.0753984	NA
ARSG	NM_001267727	586.665	0.0878781	0.658005	0.0217394	0.945555	-0.106225	0.525332	-0.0400862	1	0.00430978	0.989168	-0.0550418	0.811145	-0.00193041	0.99781	0.0574212	0.99388	0.798859	5.96e-19	-0.0832534	0.864903
ARSH	NM_001011719	0.133582	1.4288	NA	0	NA	-1.48188	NA	0	NA	0	NA	1.70236	NA	0	NA	-1.68264	NA	-0.0323994	NA	-1.56716	NA
ARSI	NM_001012301	0.725364	0	NA	1.71474	NA	2.90061	NA	1.12313	NA	2.0298	NA	0.733654	NA	-0.121431	NA	1.17469	NA	0.929487	NA	2.093	NA
ARSJ	NM_024590	4.27657	-0.198355	NA	-1.47614	NA	-2.26744	NA	-0.989685	NA	-0.952779	NA	-0.611017	NA	0.747475	NA	0.405714	NA	3.37151	0.00578913	-0.754633	NA
ARSK	NM_198150	639.461	-0.226758	0.0483475	-0.164261	0.215045	-0.0286815	0.878797	-0.0911781	0.920833	0.0325561	0.89116	0.0139144	0.962921	-0.0636388	0.837511	-0.0449971	0.999179	-0.00569569	0.96059	0.259563	0.512164
ART1	NM_004314	0.0864804	-1.90896	NA	-1.87145	NA	0	NA	0	NA	0	NA	0	NA	0	NA	0	NA	-1.87913	NA	1.77126	NA
ART3	NM_001130017	3.60281	2.97101	NA	0.833682	NA	1.23112	NA	3.36843	NA	1.74814	NA	0.227884	NA	-0.166768	NA	1.35348	NA	2.46571	0.178521	-1.22231	NA
ART4	NM_021071	0.608953	-3.43693	NA	-1.59742	NA	2.75833	NA	0.918904	NA	-2.00673	NA	-1.08257	NA	0	NA	-0.766146	NA	-1.53787	NA	1.43011	NA
ART5	NR_123732	0.192682	0	NA	0	NA	0	NA	0	NA	1.70243	NA	2.30798	NA	-1.68275	NA	-2.2882	NA	-0.0320615	NA	1.76524	NA
ARTN	NM_057090	84.856	-0.732811	0.0719084	0.223401	0.74603	0.401519	0.38303	-0.554693	0.325345	-1.05612	8.13e-05	-0.154415	0.791967	0.212276	0.814677	-0.689425	0.0461417	1.47478	1.21e-09	-0.323119	0.799689
ARV1	NM_022786	2709.75	-0.109436	0.437494	-0.0529797	0.808144	0.00632254	0.975483	-0.0501338	1	-0.0779061	0.637428	-0.0320655	0.888233	-0.069554	0.80043	-0.115395	0.652115	-0.123112	0.148479	0.0317969	0.94985
ARVCF	NM_001670	223.545	-0.390667	0.712929	-0.187176	0.908543	-0.111202	0.927994	-0.314694	1	-0.977714	0.201452	-0.823759	0.340577	0.259331	0.915908	0.105376	0.999179	1.24907	0.015895	-0.586964	0.809425
ARX	NM_139058	6.70734	-0.759015	NA	-0.632226	NA	-0.211689	NA	-0.338477	NA	-0.305238	NA	-0.328729	NA	0.848451	NA	0.871942	NA	-2.08701	0.0116414	0.454066	NA
AS3MT	NM_020682	724.001	-0.152714	0.354041	0.0986298	0.645401	0.222658	0.0791463	-0.0286855	1	-0.167535	0.324617	-0.0170453	0.963708	0.144227	0.564149	-0.006262	0.999179	-0.87803	2.71e-21	-0.0145178	0.985352
ASAH1	NM_177924	6219.19	-0.124938	0.412404	0.070447	0.751202	0.147595	0.246031	-0.0477895	1	-0.145655	0.292485	0.00492101	0.987396	0.119502	0.566942	-0.0310739	0.999179	0.448808	5.3e-08	-0.0204506	0.971992
ASAH2	NM_001143974	220.143	-0.0598359	0.889949	0.128339	0.795978	0.212131	0.480271	0.0239564	1	0.23008	0.47654	0.173466	0.655846	-0.181078	0.745104	-0.124464	0.988021	0.250436	0.209282	0.29017	0.737034
ASAH2B	NR_135904	375.462	-0.00938973	0.97731	-0.0689916	0.838622	0.067954	0.769841	0.127556	0.919684	0.170156	0.382465	-0.00585613	0.988649	-0.20915	0.323636	-0.0331382	0.999179	0.283926	0.0176565	0.179798	0.742231
ASAP1	NM_001362924	7304.44	-0.07404	0.671164	0.207504	0.0898853	0.101807	0.473504	-0.179736	0.292118	-0.0838267	0.644669	0.104502	0.542839	0.0100331	0.984978	-0.178295	0.293007	0.353593	2.59e-05	-0.00948253	0.989831
ASAP1-IT1	NR_002765	0.236552	0.720002	NA	-0.0252108	NA	-0.772994	NA	-0.0278429	NA	0.823286	NA	0	NA	-0.80374	NA	0	NA	-0.994126	NA	0.103746	NA
ASAP1-IT2	NR_045385	10.9944	-0.0702538	NA	-0.172134	NA	-0.262219	NA	-0.160339	1	-0.507317	NA	-0.0664186	NA	0.504677	NA	0.0637788	0.999179	-0.0242891	0.980904	-0.436589	NA
ASAP2	NM_001135191	18.7883	0.179469	0.879246	-0.472888	NA	-0.0218204	NA	0.630536	0.851124	-0.296697	0.820106	-0.429841	NA	-0.331255	NA	-0.198111	0.999179	0.172433	0.786264	-0.476054	0.850213
ASAP3	NM_017707	16.4466	-0.523154	0.586555	-0.0402106	NA	0.779094	NA	0.296151	1	-0.749226	0.396661	-0.762405	NA	0.197514	NA	0.210693	0.999179	-0.0263045	0.969692	-0.225801	0.943541
ASB1	NM_001040445	6012.34	0.021806	0.820582	-0.0215135	0.864424	-0.0891407	0.137343	-0.0458212	0.925178	-0.0778076	0.247359	-0.0333167	0.748107	-0.0132617	0.957756	-0.0577526	0.726575	0.0205012	0.695901	-0.0993382	0.654537
ASB10	NM_080871	0.471627	-0.987179	NA	-1.8989	NA	1.56053	NA	2.47221	NA	0.245727	NA	-2.02895	NA	-1.11719	NA	1.1574	NA	-0.052858	NA	1.23331	NA
ASB11	NM_001012428	0.779577	0	NA	2.2669	NA	0	NA	-2.32003	NA	-0.728766	NA	0.414998	NA	0.828253	NA	-0.315479	NA	2.79976	NA	-0.664817	NA
ASB12	NM_130388	8.18196	0.335724	NA	0.427036	NA	-0.352382	NA	-0.443694	NA	-1.82333	NA	-0.524645	NA	1.47997	NA	0.181289	NA	-0.66477	0.350918	-2.15849	NA
ASB13	NM_024701	66.6494	-0.419865	0.433781	-0.0912612	0.924769	0.0967314	0.886237	-0.231872	1	-0.330248	0.595862	0.103126	0.912467	0.496206	0.445965	0.0628314	0.999179	-0.43307	0.186346	0.0899081	0.966235
ASB14	NM_130387	6.25355	-0.334875	NA	0.603811	NA	0.559018	NA	-0.379666	NA	-0.274104	NA	0.614857	NA	-0.104653	NA	-0.993612	NA	0.48801	0.622516	0.0604978	NA
ASB15	NM_001290258	0	NA	NA	NA	NA	NA	NA	NA	NA	NA	NA	NA	NA	NA	NA	NA	NA	NA	NA	NA	NA
ASB16	NM_080863	38.319	-0.255193	0.753366	-0.311686	0.757902	-0.222339	0.777022	-0.165845	1	0.0114949	0.992771	0.00501423	NA	0.339008	NA	0.345489	0.91818	0.220115	0.624604	0.266799	0.89895
ASB16-AS1	NR_049729	1806.91	0.0747525	0.743912	0.0919556	0.739414	-0.0407513	0.861739	-0.0579544	1	0.00606231	0.987702	0.131881	0.543187	0.0359439	0.951602	-0.0898747	0.96285	-0.14057	0.244301	-0.0683543	0.914091
ASB17	NM_080868	7.06019	-0.857076	NA	0.315026	NA	0.17482	NA	-0.997281	NA	0	NA	0	NA	0	NA	0	NA	-6.46296	3.82e-06	0.718655	NA
ASB18	NM_212556	0.150429	0	NA	1.66065	NA	0	NA	-1.71369	NA	-0.138352	NA	-1.13776	NA	-0.803702	NA	0	NA	0.929171	NA	-0.0749514	NA
ASB2	NM_016150	2525.61	0.102118	0.918823	1.25971	0.0112786	1.39924	0.00278286	0.241645	1	0.0679075	0.958359	0.748147	0.244462	0.731635	0.329027	0.0513964	0.999179	-0.0223466	0.968701	-0.0339441	0.992957
ASB3	NM_016115	2405.45	-0.0560904	0.74932	-0.078268	0.694866	-0.0221507	0.908709	2.68e-05	1	0.0988411	0.53089	-0.0575571	0.781402	-0.143728	0.378576	0.0126707	0.999179	0.136424	0.127288	0.155212	0.696946
ASB4	NM_145872	0.134375	0.467169	NA	-0.0251639	NA	-1.48188	NA	-0.989577	NA	0	NA	0	NA	0	NA	0	NA	-0.994228	NA	-0.605311	NA
ASB5	NM_080874	0.805738	0.191169	NA	-1.77239	NA	0.0807184	NA	2.04423	NA	0.82333	NA	2.23445	NA	1.08429	NA	-0.326788	NA	-2.74143	NA	0.632922	NA
ASB6	NM_017873	4083.05	0.150597	0.183337	-0.0335183	0.87769	-0.172225	0.0728279	0.01189	1	-0.0661231	0.676166	-0.0499402	0.784403	-0.0454878	0.884533	-0.0616706	0.955058	-0.106782	0.174413	-0.216397	0.557804
ASB7	NM_024708	1407.14	0.50003	1.96e-08	-0.0900468	0.658321	-0.158927	0.201558	0.431149	4.76e-06	0.261388	0.0124733	-0.169533	0.206991	-0.0406387	0.921343	0.390282	3.72e-05	0.450768	6.65e-08	-0.238348	0.586367
ASB8	NM_024095	4225.95	0.035349	0.782204	-0.000627594	0.998042	-0.118138	0.160251	-0.0821619	0.756744	-0.0374155	0.804947	-0.0642184	0.60788	-0.114963	0.287908	-0.0881601	0.643735	-0.121387	0.051256	-0.0724154	0.799428
ASB9	NM_024087	15.7819	0.524829	NA	0.663102	NA	-0.331037	NA	-0.46931	0.957481	0.609387	NA	0.762387	NA	0.116581	NA	-0.0364186	0.999179	0.247079	0.697378	0.0848569	0.979985
ASB9P1	NR_033769	0.198634	0	NA	0.936436	NA	0	NA	-0.9896	NA	-1.97732	NA	-1.05317	NA	1.11968	NA	0.195676	NA	1.80637	NA	-1.91385	NA
ASCC1	NM_001198800	5452.63	-0.115283	0.090554	0.1777	0.00112009	0.186487	0.000458526	-0.106496	0.19124	-0.113943	0.0710122	0.0902214	0.217464	0.114306	0.10712	-0.0898577	0.361839	0.165568	0.000327335	0.00165147	0.997834
ASCC2	NM_001369923	12401.9	0.134772	0.0876999	-0.0457122	0.746621	-0.155769	0.0236582	0.0247155	1	-0.00734971	0.966097	-0.0593949	0.6067	-0.0102901	0.97797	0.0417551	0.978534	-0.0887872	0.132888	-0.141788	0.623755
ASCC3	NM_006828	16217.2	-0.0842563	0.659726	-0.0589642	0.826112	0.0396637	0.845298	0.0143716	1	0.140694	0.39814	0.0867385	0.685804	-0.0464426	0.920237	0.00751267	0.999179	0.111573	0.296558	0.225227	0.650725
ASCL1	NM_004316	163.369	-0.193118	0.764467	0.278	0.696555	0.29007	0.579961	-0.181048	1	-0.285385	0.653122	0.0336462	0.97647	0.208211	0.865379	-0.11082	0.999179	0.141294	0.699878	-0.0919065	0.966235
ASCL2	NM_005170	1.85247	0.58428	NA	0.0820459	NA	1.83786	NA	2.34009	NA	2.18825	NA	-2.04838	NA	0.761589	NA	4.99817	NA	0.0799513	0.97841	1.6047	NA
ASCL3	NM_020646	0.106411	0.883438	NA	0.936469	NA	0.0252248	NA	-0.0277876	NA	0	NA	0	NA	0	NA	0	NA	-0.0325279	NA	-1.02152	NA
ASCL4	NM_203436	0.736801	-0.0111547	NA	0.96341	NA	0.499264	NA	-0.475268	NA	0.836921	NA	-2.04406	NA	-2.68528	NA	0	NA	-0.122586	NA	0.847263	NA
ASCL5	NM_001270601	0.602765	-1.02455	NA	-0.987046	NA	3.06331	NA	3.0258	NA	-0.33472	NA	-3.00017	NA	-0.709112	NA	1.95618	NA	1.82983	NA	0.69075	NA
ASDURF	NM_001353493	2666.6	-0.147705	0.392378	-0.0883907	0.711969	0.0537267	0.784706	-0.0055881	1	-0.0591277	0.815563	-0.105549	0.608159	-0.0927647	0.778116	-0.0463432	0.999179	-0.134925	0.211068	0.0888188	0.85834
ASF1A	NM_014034	5247.83	-0.0601344	0.753366	0.177354	0.216502	0.277886	0.0123385	0.0403972	1	0.097959	0.592145	0.0778378	0.71051	0.0124122	0.983772	0.0325334	0.999179	-0.291652	0.00126916	0.15837	0.713338
ASF1B	NM_018154	14380.7	0.0480996	0.733846	-0.0699034	0.648626	-0.170365	0.0525004	-0.0523621	1	-0.0856873	0.493067	-0.0597258	0.701116	-0.0618767	0.785519	-0.0878382	0.754757	-0.542659	1.24e-17	-0.133425	0.683854
ASGR1	NM_001671	7.41771	0.225532	NA	-1.83644	NA	-1.44548	NA	0.616482	NA	0.0163367	NA	-0.683192	NA	-0.778064	NA	-0.0785363	NA	1.11147	0.214506	-0.208915	NA
ASGR2	NM_080912	5.71174	1.01733	NA	0.271065	NA	-1.376	NA	-0.629739	NA	0.506275	NA	1.24286	NA	0.195179	NA	-0.541402	NA	1.73859	0.133341	-0.510445	NA
ASH1L	NM_018489	7836.47	0.0264563	0.877142	-0.0546632	0.779531	-0.135637	0.199471	-0.0545176	1	0.12821	0.268196	0.00974652	0.972473	-0.138823	0.293899	-0.02036	0.999179	0.101768	0.202673	0.102079	0.766128
ASH1L-AS1	NR_147963	486.081	0.0402098	0.864031	-0.0965109	0.69391	-0.130617	0.423117	0.00610339	1	0.144787	0.421583	-0.0591076	0.825051	-0.0927138	0.785519	0.111181	0.8653	-0.140357	0.214652	0.104856	0.83058
ASH2L	NM_004674	8060.21	0.0430834	0.711503	0.010871	0.951834	-0.0314302	0.776677	0.000782162	1	-0.0201082	0.905292	-0.0399495	0.773984	-0.0282993	0.917217	-0.00845799	0.999179	-0.302986	1.55e-08	-0.0628687	0.816651
ASIC1	NM_001095	27.9575	0.0404357	0.972266	-0.237268	NA	-0.520066	0.464294	-0.242363	1	-0.429716	0.613689	-0.481966	NA	-0.0987377	NA	-0.0464878	0.999179	0.310167	0.526797	-0.470055	0.816967
ASIC2	NM_001094	0.0375527	0	NA	0.936504	NA	0	NA	-0.989533	NA	0	NA	0	NA	0	NA	0	NA	-0.0324775	NA	-0.0751382	NA
ASIC3	NM_004769	98.1136	0.156597	0.817672	-0.334712	0.631883	-0.395859	0.42123	0.09545	1	0.131701	0.86741	0.00866373	0.992912	0.200518	0.858417	0.323555	0.835003	0.919695	0.00193443	-0.0246936	0.993073
ASIC4	NM_018674	2.61548	1.53589	NA	0.932148	NA	-0.71599	NA	-0.112254	NA	1.66778	NA	0.74003	NA	-2.11013	NA	-1.18238	NA	2.85885	0.112931	0.132862	NA
ASIC5	NM_017419	0.319927	-3.11122	NA	-1.337	NA	0	NA	-1.76445	NA	-1.10018	NA	-1.1378	NA	0	NA	0	NA	-2.11892	NA	2.01111	NA
ASIP	NM_001672	1.03582	1.11839	NA	2.12971	NA	0.71885	NA	-0.29246	NA	1.75789	NA	-0.176057	NA	0.987052	NA	2.92096	NA	-0.0323476	0.992691	0.638963	NA
ASL	NM_000048	4527.18	0.0371906	0.747358	0.0627662	0.594208	0.0375034	0.715697	0.0119278	1	-0.018251	0.912032	0.0349438	0.802312	0.0724689	0.609991	0.0192741	0.999179	-0.280716	1.01e-07	-0.055099	0.836604
ASMT	NM_004043	116.58	0.172689	0.689161	0.151859	0.790087	0.0175156	0.9736	0.0383457	1	-0.0244618	0.978012	0.169478	0.800882	0.313284	0.675872	0.119345	0.999179	-1.97059	9.91e-18	-0.196862	0.877569
ASMTL	NM_004192	8367.44	-0.0253079	0.900144	-0.0254722	0.926211	-0.00925095	0.965758	-0.00908664	1	-0.203269	0.0743033	-0.0765801	0.684214	0.0909572	0.719276	-0.0357314	0.999179	0.496789	5.42e-10	-0.17768	0.673243
ASMTL-AS1	NR_026710	538.521	0.197566	0.71152	0.172242	0.808144	-0.102352	0.851664	-0.0770285	1	0.379359	0.40016	0.144296	0.832579	-0.0271345	0.986334	0.207928	0.966704	-0.585081	0.0282167	0.182164	0.899136
ASNS	NM_001178077	6362.51	-0.109778	0.687154	-0.0702224	0.856701	0.0467955	0.873226	0.00724011	1	-0.16121	0.524785	-0.240506	0.270685	-0.0124235	0.988111	0.0668727	0.999179	0.13846	0.360835	-0.0512119	0.953484
ASNSD1	NM_019048	6537.81	-0.197214	0.240151	-0.107203	0.644829	0.0758903	0.691207	-0.0141209	1	-0.0600697	0.821522	-0.113199	0.595351	-0.105855	0.743117	-0.052726	0.999179	-0.238271	0.0244569	0.137376	0.77759
ASNSP1	NR_146077	0.264619	0	NA	1.92772	NA	1.86371	NA	-0.126624	NA	0	NA	0.785664	NA	1.11973	NA	0.195664	NA	-0.0324018	NA	-0.0752667	NA
ASPA	NM_001128085	29.1575	0.659364	0.693375	0.139439	NA	-1.20084	0.399086	-0.680916	1	0.114013	0.915105	-0.257924	NA	0.0325592	NA	0.404497	0.843749	4.50967	3.83e-12	-0.545194	0.866158
ASPDH	NM_001024656	0.212697	0	NA	0	NA	0.971301	NA	0.9338	NA	1.70242	NA	0	NA	0.366896	NA	2.24517	NA	-0.0322626	NA	1.76555	NA
ASPG	NM_001080464	0.455871	0.926042	NA	0.93646	NA	-0.97926	NA	-0.989664	NA	1.10433	NA	-1.98596	NA	-0.855169	NA	2.23487	NA	1.77696	NA	0.17985	NA
ASPH	NM_004318	556.861	-0.00565284	0.989348	-0.0265972	0.956627	-0.105514	0.71687	-0.0845694	1	0.377244	0.0441253	0.247217	0.302813	-0.136669	0.772281	-0.00664151	0.999179	1.041	1.49e-13	0.383192	0.623755
ASPHD1	NM_181718	11.7162	-0.431526	NA	-0.130161	NA	0.370349	NA	0.0689837	1	-0.146115	NA	-0.577548	NA	-0.41019	NA	0.0212419	0.999179	0.451196	0.482145	0.285884	0.933595
ASPHD2	NM_020437	2503.75	0.613687	1.48e-25	0.0353936	0.844402	-0.268661	5.55e-05	0.309633	2.98e-06	0.457521	2.2e-15	-0.0723275	0.542044	-0.138224	0.125824	0.391624	5.71e-11	0.659499	6.16e-31	-0.155825	0.62089
ASPM	NM_018136	17685.5	-0.264461	0.522985	0.0741202	0.917308	0.323848	0.34259	-0.0147332	1	0.289745	0.473034	0.335877	0.39043	-0.0258027	0.984978	-0.0719348	0.999179	-0.676004	0.00227952	0.554442	0.62716
ASPN	NM_001193335	0.882716	-0.912137	NA	0.166802	NA	-0.365892	NA	-1.44481	NA	1.63991	NA	2.27688	NA	0.177823	NA	-0.459132	NA	-3.13051	NA	2.55259	NA
ASPRV1	NM_152792	48.4497	0.392141	0.412346	0.195285	0.793766	-0.416954	0.308643	-0.220099	1	0.469009	0.261701	-0.0444884	NA	-0.454327	NA	0.059171	0.999179	0.0615173	0.863724	0.0772506	0.966235
ASPSCR1	NM_024083	3512.52	0.0836008	0.568426	-0.0849226	0.614621	-0.146731	0.180797	0.0217922	1	-0.0149296	0.951447	-0.0290355	0.89788	0.00730629	0.987988	0.0214122	0.999179	0.0189413	0.846746	-0.0981783	0.787643
AS-PTPRE	NR_136149	37.5586	-0.0708334	0.941876	-0.503143	0.531827	-0.403712	0.549278	0.0285974	1	-0.135227	0.877179	-0.361332	NA	-0.19058	NA	0.035525	0.999179	1.38302	3.8e-05	-0.0643195	0.978062
ASRGL1	NM_001083926	1372.14	0.145082	0.689161	0.0851325	0.870969	-0.0430658	0.917325	0.0168836	1	0.10786	0.81647	0.0827123	0.87189	0.000206012	0.999862	0.0253534	0.999179	-0.920158	8.39e-08	-0.0368478	0.975948
ASS1	NM_054012	41.2656	-0.287066	0.829085	-1.12781	0.293598	-0.518494	0.647592	0.322251	1	-0.473855	0.665858	-0.689378	NA	-0.128925	NA	0.0865979	0.999179	2.51079	2.25e-06	-0.186607	0.96138
ASTE1	NM_014065	990.189	-0.0776855	0.62248	-0.197078	0.0842494	-0.147674	0.211039	-0.0282814	1	-0.096138	0.532789	-0.160996	0.201696	-0.11459	0.563834	-0.0497324	0.994484	-0.0759357	0.41125	-0.0181598	0.972741
ASTL	NM_001002036	43.9963	0.154006	0.864729	-0.383049	0.690579	-0.638912	0.293395	-0.101857	1	-0.632469	0.275124	-1.0293	NA	-0.370547	NA	0.0262856	0.999179	1.28434	0.000576521	-0.786333	0.674929
ASTN1	NM_207108	0.594653	-1.20492	NA	-2.69807	NA	1.87584	NA	3.36893	NA	0.823321	NA	0	NA	1.09224	NA	2.09161	NA	-2.70444	NA	2.02747	NA
ASTN2	NM_198187	604.92	-0.159309	0.584118	-0.137554	0.709871	-0.130814	0.634177	-0.152569	0.944827	-0.123345	0.717832	-0.199482	0.478482	0.00549824	0.994705	0.081636	0.999179	0.347847	0.0245593	0.0362451	0.971992
ASTN2-AS1	NR_033973	0.0429421	0	NA	0	NA	0	NA	0	NA	-1.10008	NA	-1.13771	NA	0	NA	0	NA	0.929284	NA	-1.03688	NA
ASXL1	NM_015338	27973.2	0.0336427	0.853033	0.337622	0.000155896	0.246275	0.0110491	-0.0577042	1	0.0596398	0.753123	0.179596	0.127138	0.0639119	0.829989	-0.0560446	0.988021	-1.00371	5.6e-42	0.026334	0.962365
ASXL2	NM_018263	6355.25	-0.133333	0.0571988	0.0112839	0.944562	-0.014915	0.896102	-0.159531	0.0163457	-0.018868	0.900338	0.107956	0.155047	-0.0442652	0.802661	-0.17109	0.00801396	-0.139016	0.00651847	0.114762	0.660423
ASXL3	NM_030632	4.67659	-0.333127	NA	0.0940254	NA	0.551944	NA	0.124793	NA	0.0463759	NA	-0.188456	NA	-0.177103	NA	0.0577282	NA	-0.602304	0.610466	0.379447	NA
ASZ1	NM_130768	1.4005	-2.72935	NA	-0.140944	NA	2.64645	NA	0.058089	NA	-0.837725	NA	-0.947769	NA	-0.515134	NA	-0.405091	NA	-0.462951	0.838382	1.89122	NA
ATAD1	NM_001321967	8804.59	-0.0230328	0.936269	0.0111832	0.975924	0.11411	0.550937	0.0798937	1	0.170019	0.369163	0.0580797	0.845942	-0.0765775	0.86609	0.0353622	0.999179	0.162985	0.177761	0.193297	0.713338
ATAD2	NM_014109	13998.6	-0.0385181	0.824478	-0.216968	0.0344202	-0.159782	0.141693	0.0186681	1	0.055169	0.768452	-0.141174	0.267736	-0.258233	0.0102106	-0.0618902	0.972505	-0.497467	1.83e-11	0.0939826	0.80076
ATAD2B	NM_017552	5621.86	-0.0995485	0.532376	-0.0506603	0.831183	-0.0105419	0.960827	-0.0594301	1	0.0761804	0.682917	0.0867995	0.635147	-0.0703127	0.81932	-0.0809317	0.91818	-0.159344	0.0756327	0.176019	0.675181
ATAD3A	NM_001170535	15706.6	0.0929117	0.724808	0.0517493	0.89569	-0.136014	0.522468	-0.0948515	1	-0.0322442	0.933722	0.113748	0.690688	0.0434336	0.947606	-0.102559	0.965116	-0.24898	0.0596792	-0.124834	0.840802
ATAD3B	NM_031921	10621.4	0.132065	0.388152	-0.132993	0.40979	-0.293333	0.00459779	-0.0282744	1	-0.0406473	0.866908	0.0442224	0.85362	0.0898055	0.74322	0.00493584	0.999179	-0.0820724	0.411245	-0.172399	0.683854
ATAD3C	NM_001039211	307.031	-0.193014	0.579531	-0.13896	0.774684	0.0328888	0.942219	-0.021165	1	-0.218443	0.597965	-0.0812799	0.890598	-0.0519971	0.966534	-0.18916	0.930906	-1.94003	5.67e-27	-0.0251038	0.987173
ATAD5	NM_024857	4882.89	-0.0876125	0.799962	-0.108766	0.805078	0.0608201	0.85987	0.0819738	1	0.22731	0.421093	-0.00902652	0.987841	-0.200359	0.642494	0.0359779	0.999179	-0.252603	0.144031	0.315118	0.685893
ATAT1	NM_001031722	910.928	0.0988036	0.617987	0.156745	0.396977	0.0697444	0.71398	0.0118028	1	-0.030092	0.921027	0.0668929	0.79037	0.237796	0.125333	0.140811	0.681225	0.0847012	0.471911	-0.128584	0.790524
ATCAY	NM_033064	32.0602	-0.145818	0.90146	-0.274453	0.848994	0.510894	0.533086	0.639529	0.790725	0.0425535	0.976814	0.0455193	NA	-0.134209	NA	-0.137175	0.999179	0.925546	0.0602598	0.188419	0.950516
ATE1	NM_007041	3418.64	-0.12194	0.467969	-0.0383274	0.894907	-0.0174143	0.939327	-0.101027	0.914202	0.0307248	0.912032	0.102105	0.596015	-0.0708021	0.839638	-0.142182	0.610422	-0.142783	0.155915	0.15294	0.729805
ATE1-AS1	NR_120495	67.3404	-0.515713	0.452982	0.102864	0.931723	0.144454	0.863952	-0.474122	0.825436	-0.208854	0.809362	0.0355094	0.978898	-0.17411	0.915908	-0.418473	0.786664	1.35504	9.89e-05	0.306932	0.86946
ATF1	NM_005171	2652.66	0.0217896	0.902149	-0.305767	0.000295717	-0.290678	0.000579519	0.0368785	1	-0.102108	0.444148	-0.304911	0.000412612	-0.197562	0.0693029	0.00524081	0.999179	-0.157485	0.0417657	-0.123603	0.724942
ATF2	NM_001880	7802.24	-0.0281024	0.795963	0.0256983	0.861407	0.00632336	0.960448	-0.0474773	0.966786	0.0597558	0.527261	-0.00662648	0.972473	-0.0817975	0.427883	-0.0154152	0.999179	0.429821	8.26e-20	0.0881532	0.712693
ATF3	NM_001674	2657.65	0.893123	0.00245709	-0.503556	0.197347	-0.569652	0.0879885	0.827026	0.00954269	0.316167	0.484156	-0.493378	0.200211	-0.24836	0.750585	0.561185	0.193481	2.32785	1.31e-23	-0.576731	0.654537
ATF4	NM_182810	41875.4	0.0830501	0.392925	-0.052406	0.689541	-0.0816168	0.335616	0.0538392	0.95392	-0.00049488	0.998259	-0.0503575	0.685175	0.0370816	0.873689	0.0869442	0.585544	0.0690284	0.262652	-0.0832268	0.752726
ATF5	NM_001193646	30249.1	-0.0934219	0.74991	-0.385859	0.0357766	-0.420729	0.0139563	-0.128292	0.974483	-0.224373	0.334362	-0.598667	0.000161903	-0.445805	0.0148325	-0.0715108	0.999179	-0.838113	2.58e-10	-0.130672	0.851389
ATF6	NM_007348	12245	0.00026555	0.998066	-0.0289232	0.827221	-0.091856	0.170881	-0.0626673	0.784199	-0.00440886	0.976847	0.026193	0.830516	-0.0248654	0.911413	-0.0554673	0.808243	0.438277	1.57e-23	-0.00437087	0.991947
ATF6B	NM_004381	15411.9	0.108891	0.394516	0.0904646	0.545985	-0.0211433	0.897094	-0.00271731	1	-0.0250803	0.908472	0.00994137	0.971938	0.0372184	0.915908	0.00219667	0.999179	0.0537593	0.528751	-0.133624	0.700285
ATF7	NR_073163	1863.97	0.147724	0.336635	0.0108491	0.970914	-0.103886	0.480439	0.0329884	1	0.0587055	0.788279	0.103248	0.564912	0.0294498	0.951068	-0.0150922	0.999179	0.190159	0.0407185	-0.0886458	0.838712
ATF7IP	NM_001286515	7084.45	-0.10218	0.522194	0.00515317	0.987682	-0.00802183	0.970838	-0.115355	0.770008	-0.157509	0.236668	-0.0728189	0.712878	-0.0142227	0.981144	-0.0989123	0.829092	-0.0628877	0.530803	-0.0550387	0.910884
ATF7IP2	NR_147927	2019.12	-0.0137968	0.943837	0.126369	0.342504	0.223535	0.0173582	0.0833694	0.90635	0.0313715	0.886048	0.0862565	0.574603	0.0465359	0.889175	-0.00834911	0.999179	0.0385756	0.677776	0.0454387	0.919979
ATF7-NPFF	NM_001366559	1540.01	0.190097	0.195396	0.0243199	0.935585	-0.140706	0.320323	0.0250713	1	0.0519766	0.829214	0.0848005	0.681829	0.0571511	0.886218	0.0243272	0.999179	0.201758	0.0364087	-0.137745	0.753621
ATG10	NM_001131028	833.184	-0.0188575	0.939873	0.016171	0.957983	0.136141	0.357088	0.101112	0.925425	0.223888	0.0968806	0.158082	0.342815	-0.0878225	0.786983	-0.0220164	0.999179	-0.348192	0.000283687	0.243064	0.62716
ATG101	NM_021934	5162.49	0.0755526	0.51781	-0.153423	0.0829501	-0.0968287	0.309517	0.132147	0.281525	0.0320514	0.851375	-0.0436726	0.780602	0.0807058	0.622098	0.15643	0.113926	0.0148682	0.853555	-0.0431968	0.900404
ATG12	NM_004707	5427.66	0.0144218	0.917355	-0.0260835	0.876618	0.00173989	0.990792	0.0422452	1	0.0604689	0.582108	-0.0397028	0.771993	-0.0415014	0.842811	0.0586703	0.874307	0.251648	2.96e-06	0.0463162	0.873603
ATG13	NM_014741	10329.7	0.0050788	0.978252	-0.0841925	0.531974	-0.112382	0.249122	-0.0231103	1	-0.033988	0.849549	-0.0627419	0.666022	-0.00716408	0.985895	0.0215899	0.999179	0.318402	5.2e-07	-0.0387508	0.921345
ATG14	NM_014924	1908.89	-0.0372871	0.822977	0.10056	0.493191	0.0685311	0.604764	-0.0693156	0.968394	-0.010782	0.96254	0.000696284	0.998175	-0.0332744	0.927504	-0.0447526	0.994484	0.00131686	0.99077	0.0267714	0.95762
ATG16L1	NM_030803	4148.86	0.0484427	0.698308	0.193889	0.00985467	0.155701	0.0466645	0.0102549	1	-0.0642645	0.610939	0.0549685	0.695462	0.0979112	0.464097	-0.0213218	0.999179	-0.469314	4.14e-16	-0.112401	0.700668
ATG16L2	NM_033388	1868.5	-0.155006	0.584739	-0.10225	0.801828	-0.031859	0.928752	-0.0846153	1	-0.150652	0.621141	-0.0650955	0.880392	0.0297422	0.976553	-0.0558148	0.999179	-0.142635	0.399711	0.0046165	0.997834
ATG2A	NM_001367972	5421.32	0.0535276	0.749274	0.00766432	0.977694	-0.0694126	0.626754	-0.0235493	1	-0.118999	0.387405	-0.0583579	0.765532	0.0738194	0.781037	0.0131786	0.999179	-0.0405082	0.675938	-0.172216	0.673243
ATG2B	NM_018036	5546.26	-0.0504995	0.733846	-0.0134334	0.953125	0.00849985	0.96205	-0.0285663	1	0.17863	0.0574226	0.112306	0.358309	-0.0854058	0.664189	-0.0190821	0.999179	0.0147918	0.871873	0.229443	0.475719
ATG3	NM_022488	7161.85	0.0908119	0.242204	-0.0904751	0.240037	-0.170593	0.00200451	0.0106938	1	0.0353126	0.756401	-0.126115	0.0557563	-0.127459	0.0658317	0.033969	0.988021	-0.28312	4.22e-10	-0.0551503	0.807593
ATG4A	NM_052936	2356.16	-0.0275559	0.80497	-0.0582007	0.600068	-0.0190287	0.862913	0.0116162	1	0.051361	0.613671	-0.0886172	0.281632	-0.055663	0.703833	0.0843152	0.51238	0.17727	0.000402138	0.0791981	0.740235
ATG4B	NM_178326	7498.67	0.0197226	0.873046	-0.0897935	0.327746	-0.0691409	0.411519	0.0403752	1	-0.0502257	0.658515	-0.117955	0.135355	-0.0148867	0.963749	0.0528424	0.904284	-0.189413	0.000296655	-0.0696507	0.781484
ATG4C	NM_178221	1655.19	-0.363257	0.25955	-0.0425532	0.945357	0.293622	0.32415	-0.0270821	1	0.0878289	0.870434	0.108646	0.830925	-0.053771	0.964345	-0.0745879	0.999179	0.246167	0.254142	0.451309	0.654537
ATG4D	NM_032885	2647.07	0.0179366	0.932008	-0.125266	0.40979	-0.211594	0.0468754	-0.0683915	1	-0.117094	0.423155	-0.102248	0.531607	-0.0396517	0.922218	-0.0544974	0.99044	-0.278077	0.000642848	-0.134721	0.73202
ATG5	NM_004849	3018.46	-0.0878051	0.543218	-0.0183172	0.940497	0.126596	0.26534	0.0571079	1	0.0528772	0.775641	0.0111438	0.969075	-0.0104748	0.983772	0.0312586	0.999179	-0.0944559	0.267665	0.140931	0.699972
ATG7	NM_001349238	1972.9	0.0377283	0.856455	0.0810551	0.718729	-0.0117654	0.959412	-0.0550922	1	0.0811336	0.686056	-0.0301159	0.91482	-0.0211266	0.969336	0.0901229	0.904987	-0.0870191	0.403837	0.0437097	0.938122
ATG9A	NM_001077198	6440.79	0.0167511	0.878471	-0.0158626	0.915863	-0.124686	0.037031	-0.0920719	0.357364	-0.0853449	0.234026	-0.0368686	0.736973	-0.0341443	0.849148	-0.0826205	0.451931	0.255217	9.94e-09	-0.101799	0.670748
ATG9B	NR_073169	22.5003	-0.208076	0.855747	-0.0124211	NA	-0.106805	0.929865	-0.302459	1	-0.0387705	0.98097	0.0366108	NA	-0.228862	NA	-0.304243	0.99388	0.163615	0.791425	0.169516	0.959646
ATIC	NM_004044	31036.2	0.00723865	0.980054	0.0762999	0.772361	0.0609354	0.751147	-0.00812589	1	0.067142	0.780877	0.114511	0.56795	0.000324542	0.999677	-0.0470447	0.999179	-0.230179	0.0235416	0.0602389	0.918722
ATL1	NM_015915	58.4214	0.00316843	0.996374	0.195412	0.787757	0.0109586	0.988384	-0.181285	1	0.417285	0.33092	0.205897	NA	-0.183197	NA	0.0281904	0.999179	0.137215	0.677628	0.414473	0.740235
ATL2	NM_001135673	5138.32	-0.165118	0.443146	-0.0839492	0.799568	0.0875581	0.697889	0.00638933	1	-0.00423893	0.991994	-0.015255	0.973679	-0.0742678	0.889143	-0.0632517	0.999179	-0.182281	0.163861	0.161097	0.77759
ATL3	NM_015459	8965.28	0.0188322	0.90108	0.119679	0.242693	0.210257	0.00514617	0.10941	0.513064	0.0844748	0.459076	0.142657	0.124467	0.0868744	0.574938	0.0286918	0.999179	0.115035	0.0875267	0.0659157	0.828111
ATM	NM_001351834	9694.81	-0.158393	0.425894	0.0827918	0.783141	0.215405	0.175516	-0.0257798	1	0.21315	0.208494	0.180089	0.34643	-0.0347422	0.956602	-0.00168087	0.999686	0.272774	0.0169771	0.371807	0.438628
ATMIN	NM_015251	7842.67	-0.0565661	0.473358	-0.0321543	0.784452	-0.0479269	0.511986	-0.0723387	0.561964	-0.107615	0.0674936	-0.0423771	0.659151	-0.0378473	0.806578	-0.103085	0.158818	-0.0897393	0.0490092	-0.0507522	0.807385
ATN1	NM_001007026	20463.7	0.19975	0.0812343	-0.190526	0.0954503	-0.373998	1.99e-05	0.0162781	1	-0.0226133	0.92482	-0.111972	0.449592	-0.0999972	0.646185	-0.0106382	0.999179	-0.0925264	0.303131	-0.222007	0.588747
ATOH1	NM_005172	0.345499	-0.0780533	NA	1.27523	NA	1.33622	NA	-0.0168931	NA	0	NA	0	NA	1.11967	NA	1.15729	NA	-0.994201	NA	-0.0601262	NA
ATOH7	NM_145178	0.495249	3.16364	NA	0	NA	-0.429331	NA	2.75933	NA	0.823243	NA	0	NA	0.947444	NA	1.94674	NA	-0.0324895	NA	-2.33924	NA
ATOH8	NM_032827	4.86324	-2.11523	NA	1.18379	NA	3.15551	NA	-0.143476	NA	0.941835	NA	0.885477	NA	-0.438626	NA	-0.382268	NA	0.442175	0.725765	3.0568	NA
ATOX1	NM_004045	5025.91	-0.0119499	0.957663	0.0610249	0.794327	0.0856528	0.568263	0.012678	1	-0.0147594	0.958021	0.0390379	0.874222	0.044764	0.91548	-0.00903328	0.999179	0.263926	0.00220152	-0.00249887	0.997952
ATP10A	NM_024490	104.331	0.297095	0.579832	0.278794	0.668186	0.512251	0.19658	0.530552	0.379539	0.938545	0.0241818	0.568679	0.310404	0.232758	0.838321	0.602623	0.356123	-2.00805	2.95e-11	0.641816	0.673243
ATP10B	NM_001366652	3.88956	3.10491	NA	1.93453	NA	-3.66594	NA	-2.49557	NA	-0.138268	NA	-0.289493	NA	-0.0247024	NA	0.126521	NA	2.26665	0.194722	-3.2425	NA
ATP10D	NM_020453	4200.19	-0.0298802	0.821503	0.0881032	0.424458	0.0238087	0.850935	-0.0941747	0.603982	0.0530459	0.662045	0.0685959	0.543029	-0.0867036	0.497047	-0.102254	0.439318	0.890916	8.5e-62	0.0832321	0.76148
ATP11A	NM_032189	15249.4	-0.0933391	0.719644	0.109213	0.726059	0.105177	0.639821	-0.0973753	1	-0.0453013	0.904258	0.0955763	0.752237	0.0335606	0.965363	-0.107317	0.952532	-1.47622	4.1e-37	0.0483393	0.952482
ATP11A-AS1	NR_046661	0.0544425	0.929153	NA	0	NA	-0.982147	NA	0	NA	0	NA	0	NA	0	NA	0	NA	-0.0324807	NA	-1.06661	NA
ATP11AUN	NM_207440	0.0285589	0.883472	NA	0	NA	-0.936527	NA	0	NA	0	NA	0	NA	0	NA	0	NA	-0.0324759	NA	-1.02157	NA
ATP11B	NM_014616	13936.8	-0.0805929	0.734741	-0.0852628	0.778222	0.0142315	0.960448	0.0189014	1	0.130324	0.554601	-0.0254943	0.948128	-0.114807	0.748088	0.0410119	0.999179	0.184353	0.131232	0.211151	0.698427
ATP11C	NM_173694	5814.94	-0.161078	0.485941	0.130959	0.650123	0.296365	0.080266	0.00432803	1	0.136562	0.592145	0.223573	0.286456	0.0437339	0.947606	-0.0432762	0.999179	-0.162772	0.247513	0.297876	0.651574
ATP12A	NM_001676	12.9554	-0.361777	NA	0.539466	NA	-0.156638	NA	-1.05788	0.664236	0.452332	NA	0.981151	NA	0.320903	NA	-0.207915	0.999179	0.838477	0.247418	0.814618	0.795227
ATP13A1	NM_020410	21525.8	0.195042	0.103912	0.0323989	0.901149	-0.0910954	0.506239	0.0715482	0.988778	0.133647	0.325403	0.0764524	0.677635	-0.0101675	0.984307	0.0470275	0.996707	0.251635	0.00209982	-0.0610395	0.892794
ATP13A2	NM_022089	7222.03	-0.00411195	0.97626	0.033796	0.800281	-0.0697801	0.354033	-0.107688	0.220776	0.0329121	0.781598	0.0904517	0.247022	0.101598	0.214703	0.0440585	0.933088	-0.0359912	0.528995	0.0373472	0.888364
ATP13A3	NM_001367549	19432.7	-0.129104	0.675376	-0.143854	0.690579	0.0552862	0.867336	0.0700359	1	0.0628547	0.886048	-0.0878728	0.824557	-0.181747	0.672858	-0.03102	0.999179	0.0218281	0.912954	0.192151	0.792449
ATP13A4	NM_032279	61.5811	0.552895	0.33228	0.219374	0.816204	-0.0175059	0.983288	0.316015	0.956797	-0.00127082	0.999197	0.0564348	0.961746	-0.131644	0.937008	-0.189349	0.996195	0.388468	0.300417	-0.55373	0.719138
ATP13A4-AS1	NR_046726	0.329037	-3.18149	NA	-2.1822	NA	0	NA	-0.989621	NA	0	NA	0	NA	1.93559	NA	1.97321	NA	-3.15037	NA	3.04248	NA
ATP13A5	NM_198505	0.711773	-1.48185	NA	-1.32326	NA	-1.75319	NA	-1.91178	NA	1.09346	NA	-0.169872	NA	-2.8987	NA	-1.63539	NA	-1.38989	NA	2.57637	NA
ATP13A5-AS1	NR_046758	0.0407157	0	NA	0.936504	NA	0	NA	-0.989533	NA	0	NA	0	NA	0	NA	0	NA	-0.0324775	NA	-0.0751382	NA
ATP1A1	NM_000701	123128	-0.00769984	0.949725	0.0339093	0.794173	-0.0169482	0.871531	-0.0585573	0.846885	-0.145265	0.0146902	-0.0342374	0.773984	0.00910253	0.977919	-0.101925	0.261417	-0.0693113	0.182978	-0.137256	0.575807
ATP1A1-AS1	NR_027646	185.495	0.0713594	0.849361	-0.109405	0.813335	-0.0306402	0.939491	0.150124	0.976684	0.056296	0.910427	0.0228233	0.971781	-0.105412	0.88362	-0.0719388	0.999179	-0.0901086	0.654595	-0.0147326	0.992601
ATP1A2	NM_000702	1.72095	0.348831	NA	0.27127	NA	-2.16507	NA	-2.08751	NA	-2.35907	NA	-4.20178	NA	0.75165	NA	2.59432	NA	0.342497	0.85086	-2.70781	NA
ATP1A3	NM_152296	202.954	-0.22103	0.611328	-0.0799934	0.911986	0.182707	0.653406	0.0416701	1	-0.145957	0.800741	0.20655	0.68545	0.0682116	0.960172	-0.284295	0.783014	-0.55321	0.0167477	0.0753779	0.962055
ATP1A4	NM_001001734	11.7769	-0.530347	NA	-0.144208	NA	0.44493	NA	0.058792	1	-0.610758	NA	0.340545	NA	0.638536	NA	-0.312766	0.999179	0.245827	0.740876	-0.0802647	0.987173
ATP1B1	NM_001677	1476.88	-0.311467	0.0848967	-0.31356	0.073306	-0.136536	0.522885	-0.134443	0.925425	-0.349945	0.0336516	-0.326743	0.0655914	-0.238582	0.320114	-0.261784	0.311603	-0.572155	3.02e-06	-0.0382741	0.966235
ATP1B2	NM_001303263	95.5546	0.0556622	0.932767	-0.372642	0.455394	-0.429289	0.26808	-0.00098535	1	-0.328515	0.54756	-0.71946	0.0763243	-0.138967	0.921979	0.251978	0.953805	-0.998015	0.000155839	-0.383836	0.76346
ATP1B3	NM_001679	15138.4	-0.0666607	0.453078	-0.0431363	0.728627	0.0262617	0.794	0.00273736	1	-0.0739576	0.389202	-0.0409274	0.725064	-0.0194697	0.938419	-0.0524999	0.8764	-0.0823174	0.122228	-0.00701102	0.985475
ATP1B4	NM_012069	0.248705	0	NA	0.93642	NA	2.01343	NA	1.01431	NA	1.50366	NA	0.785612	NA	-1.48407	NA	-0.766119	NA	-0.0321813	NA	1.56677	NA
ATP23	NM_033276	971.325	-0.185311	0.09293	-0.118606	0.391621	0.0219534	0.89914	-0.0447518	1	-0.118509	0.373316	-0.124337	0.353329	-0.0400149	0.915908	-0.0341871	0.999179	-0.307013	4.1e-05	0.0670606	0.866091
ATP2A1	NM_001286075	196.286	-0.131425	0.768613	0.000301897	0.999644	0.0900099	0.837575	-0.0417174	1	-0.147553	0.758397	-0.111593	0.834192	0.0284087	0.983705	-0.00755176	0.999179	0.29565	0.185076	-0.0159	0.99346
ATP2A1-AS1	NR_046289	495.582	0.252888	0.396673	0.229614	0.490318	0.0286256	0.945305	0.0518987	1	0.238306	0.444245	0.27649	0.357011	0.048615	0.963525	0.0104315	0.999179	-0.650901	0.000121158	-0.0141993	0.993073
ATP2A2	NM_001681	39015.6	0.136946	0.105849	0.022535	0.902578	-0.0367102	0.744287	0.0777008	0.774229	0.0381011	0.788897	-0.0651188	0.581648	-0.0775334	0.596985	0.0256865	0.999179	0.30896	2.27e-08	-0.0985476	0.719138
ATP2A3	NM_005173	29367.6	-0.085806	0.577451	-0.0057886	0.984604	-0.0423764	0.79454	-0.122394	0.65222	-0.160893	0.178842	0.0239064	0.924369	0.0527928	0.875359	-0.132007	0.537826	0.143405	0.0927712	-0.0747513	0.853175
ATP2B1	NM_001366521	11507.2	-0.265525	0.0300952	-0.0107059	0.971896	0.152109	0.270088	-0.10271	0.901306	-0.126235	0.446184	0.0539158	0.820349	-0.0313672	0.94834	-0.211518	0.185483	0.285412	0.00199039	0.139555	0.752726
ATP2B1-AS1	NR_028138	230.388	-0.332954	0.212657	-0.229746	0.477023	-0.116313	0.719601	-0.21952	0.802586	-0.137606	0.698853	-0.202829	0.510496	-0.206832	0.628736	-0.141608	0.948874	0.349992	0.0372545	0.195631	0.802619
ATP2B2	NM_001001331	1.59832	-0.840197	NA	1.0073	NA	1.4467	NA	-0.400761	NA	-2.33013	NA	-0.853088	NA	1.1184	NA	-0.35862	NA	2.76249	0.163074	-1.48889	NA
ATP2B2-IT2	NR_046766	0	NA	NA	NA	NA	NA	NA	NA	NA	NA	NA	NA	NA	NA	NA	NA	NA	NA	NA	NA	NA
ATP2B3	NM_001001344	2.99791	-1.60356	NA	-3.20815	NA	-1.63245	NA	-0.0278938	NA	-0.453461	NA	-0.728818	NA	-0.249347	NA	0.026009	NA	0.936709	0.498975	1.14996	NA
ATP2B4	NM_001684	746.983	-0.353086	5.51e-05	0.0384709	0.867105	0.0785783	0.577965	-0.312979	0.00075338	-0.204459	0.147247	0.318889	0.00537014	0.0883641	0.788998	-0.434984	2.98e-05	-1.67984	4.29e-95	0.148959	0.720429
ATP2C1	NM_001001486	14296.7	-0.103983	0.488584	0.172853	0.165372	0.26994	0.00594022	-0.00689598	1	0.0271332	0.912067	0.130054	0.362106	0.0592425	0.854256	-0.0436782	0.999179	-4.71e-05	0.999549	0.13137	0.738482
ATP2C2	NM_001291454	1.47338	1.79778	NA	0.555267	NA	-0.803557	NA	0.438941	NA	0.9307	NA	-2.64231	NA	-1.57653	NA	1.99641	NA	0.0356053	0.990756	-0.866416	NA
ATP2C2-AS1	NR_146503	49.2745	0.0852716	0.905915	0.232427	0.769119	0.10105	0.877081	-0.0461059	1	0.376652	0.549852	0.27555	NA	0.0146696	NA	0.115772	0.999179	-0.800651	0.014095	0.291773	0.852804
ATP4A	NM_000704	64.4319	-0.107859	0.947193	-1.2467	0.234695	-0.570898	0.62024	0.567941	0.991253	-0.870628	0.443061	-0.918261	0.420934	0.0526852	0.988536	0.100318	0.999179	0.832135	0.234745	-0.762489	0.802619
ATP4B	NM_000705	19.1761	0.0343739	0.980233	0.11641	NA	-0.128723	NA	-0.210759	1	-0.399	0.653122	-0.552762	NA	-0.445575	NA	-0.291813	0.991434	1.08063	0.0185053	-0.433123	0.846423
ATP5F1A	NM_001001937	75491	0.0425735	0.817857	0.0631988	0.776466	0.0362717	0.836609	0.0156465	1	0.0702292	0.709163	0.0808235	0.659211	0.0234589	0.963525	0.0128646	0.999179	-0.110674	0.226526	0.0279978	0.961295
ATP5F1B	NM_001686	116245	0.0560634	0.773765	0.0707863	0.767738	0.0158075	0.943767	0.00108462	1	0.0594704	0.790185	0.0922527	0.636513	0.0485088	0.910036	0.0157265	0.999179	-0.16197	0.0909482	0.00374972	0.997544
ATP5F1C	NM_001001973	20778.4	-0.0732884	0.586008	0.0437144	0.82409	0.130796	0.196554	0.0137937	1	0.0496799	0.767556	0.0459147	0.793448	0.0183158	0.966468	0.022081	0.999179	-0.0559764	0.493336	0.123279	0.711555
ATP5F1D	NM_001001975	14774.5	0.0244492	0.906642	0.10112	0.584452	0.0955564	0.50892	0.0188854	1	0.00792007	0.977592	0.0585503	0.788231	0.0410946	0.922941	-0.00953569	0.999179	-0.120515	0.203176	-0.0162233	0.978029
ATP5F1E	NM_006886	27059.6	-0.0660906	0.624037	0.0981171	0.455591	0.205708	0.0153073	0.0415005	1	0.035221	0.851375	0.00273421	0.991302	0.053362	0.836714	0.0858488	0.783014	0.152102	0.0332034	0.101637	0.756297
ATP5IF1	NM_016311	19699.8	-0.0352933	0.858934	0.0760493	0.725146	0.16002	0.202628	0.0486773	1	0.0250028	0.923638	0.0396876	0.872652	0.0816359	0.778116	0.0669512	0.974511	0.0465973	0.655586	0.0606617	0.899136
ATP5MC1	NM_001002027	11508.3	0.0799636	0.771348	0.156764	0.557132	0.0773717	0.755909	0.000571033	1	0.115206	0.680958	0.174736	0.461548	0.0799414	0.884548	0.0204112	0.999179	-0.133504	0.356534	0.0356386	0.967808
ATP5MC2	NM_005176	25127.9	-0.00560561	0.970494	0.0739585	0.507258	0.0959275	0.244059	0.0163634	1	0.0176266	0.916088	0.0206595	0.901467	0.0392286	0.862564	0.0361958	0.992714	-0.173069	0.00189504	0.0235652	0.947772
ATP5MC3	NM_001689	35527.5	-0.00878189	0.971259	0.0966728	0.62872	0.112405	0.435953	0.00695082	1	0.0629709	0.771648	0.0604638	0.789257	0.0647783	0.853753	0.0672853	0.980698	-0.112189	0.260353	0.0720954	0.880137
ATP5MD	NM_001206426	6693.52	-0.0916633	0.334747	0.135239	0.0798912	0.210254	0.000870425	-0.016648	1	0.0149168	0.929139	0.0185701	0.913885	0.0641624	0.6862	0.060509	0.858334	-0.030507	0.647017	0.106877	0.693675
ATP5ME	NM_007100	10002.6	0.0195053	0.906642	0.115526	0.335403	0.0768515	0.504331	-0.0191691	1	0.0311119	0.870773	0.104537	0.387865	0.0923525	0.597123	0.0189278	0.999179	0.120003	0.102485	0.0119532	0.979985
ATP5MF	NM_004889	17085.3	0.0745938	0.701002	0.118408	0.539595	0.0562459	0.759523	0.0124318	1	0.0736295	0.739265	0.0950589	0.641551	0.0931137	0.759384	0.0716843	0.978358	-0.133262	0.194974	-0.000576016	0.999057
ATP5MF-PTCD1	NM_001198879	5167.81	0.079306	0.568426	0.0875236	0.567065	0.0327099	0.829982	0.0244923	1	-0.0855413	0.544078	0.026592	0.903757	0.125774	0.384668	0.013641	0.999179	-0.111993	0.15538	-0.164512	0.661745
ATP5MG	NM_006476	23338.2	0.0480541	0.758852	0.0625368	0.738267	0.0296798	0.850935	0.0151972	1	0.0624449	0.708187	0.0602499	0.729073	0.0457427	0.886218	0.0479377	0.992507	-0.0416669	0.638038	0.0147636	0.976476
ATP5MGL	NM_001165877	29.9432	-0.220255	0.78124	-0.243686	NA	-0.198423	0.794782	-0.174991	1	0.105486	0.924797	0.32205	NA	0.0176259	NA	-0.198939	0.999179	-0.366042	0.386732	0.326125	0.864556
ATP5MPL	NM_004894	9827.65	5.22e-05	1	0.105249	0.518213	0.105105	0.41297	-9.14e-05	1	0.0829094	0.616019	0.0697608	0.70675	0.0261973	0.953393	0.039346	0.999179	-0.063942	0.497112	0.0832229	0.83011
ATP5PB	NM_001688	33749.2	0.0273486	0.858722	0.0749604	0.608039	0.0660496	0.571383	0.0184377	1	0.0562883	0.712507	0.0834113	0.526029	0.0493818	0.849148	0.0222587	0.999179	-0.144032	0.0380243	0.029292	0.945305
ATP5PD	NM_006356	7654.26	0.00505518	0.981246	0.0170655	0.944301	0.0424691	0.777741	0.0304588	1	0.00322935	0.990623	0.00507728	0.985836	0.0351166	0.923981	0.0332686	0.999179	-0.0806498	0.346073	-0.00148821	0.999057
ATP5PF	NM_001003697	11399.6	0.0414569	0.779948	0.090235	0.512545	0.0598752	0.626754	0.0110971	1	0.00804367	0.97052	0.0401151	0.819017	0.0190035	0.964261	-0.0130679	0.999179	-0.155643	0.0273742	-0.0330576	0.937652
ATP5PO	NM_001697	21586.6	-0.0090808	0.947829	0.0969354	0.294696	0.118926	0.113026	0.0129095	1	0.010406	0.952766	0.00542579	0.979744	0.0515417	0.777683	0.0565218	0.885772	0.0581004	0.346073	0.0198527	0.95762
ATP6AP1	NM_001183	9516.83	-0.0129377	0.92904	-0.00559893	0.9765	-0.0207485	0.865223	-0.0280872	1	-0.141022	0.061446	-0.0353284	0.804243	0.106313	0.303171	0.000619062	0.999686	0.261325	1.62e-06	-0.127808	0.660423
ATP6AP1L	NM_001349372	969.951	-0.0221316	0.94548	0.254197	0.189328	0.296736	0.0745771	0.0204081	1	-0.00312832	0.99424	0.0849802	0.789257	0.0785573	0.885805	-0.00955122	0.999179	-0.196625	0.149845	0.0193029	0.984116
ATP6AP2	NM_005765	9593.72	-0.0760233	0.606327	0.0321192	0.890873	0.186939	0.0605048	0.0787962	0.929323	0.0123676	0.95925	-0.015806	0.953714	0.0388924	0.915908	0.0670661	0.942383	0.42194	5.84e-09	0.0886429	0.807189
ATP6V0A1	NM_001130020	8285.78	-0.132021	0.412101	0.02318	0.937451	-0.0119282	0.959412	-0.16713	0.443969	-0.19698	0.125773	0.0299745	0.914315	0.118364	0.612399	-0.10859	0.79897	0.778079	5.15e-20	-0.0646437	0.897786
ATP6V0A2	NM_012463	8735.34	0.0737435	0.477477	-0.0533258	0.697773	-0.0762357	0.399879	0.0508335	0.984548	-0.0162304	0.924532	0.0168037	0.924713	0.0220858	0.938472	-0.0109482	0.999179	0.267977	1.16e-06	-0.0896862	0.739512
ATP6V0A4	NM_130840	1.5898	1.7138	NA	3.05316	NA	1.67779	NA	0.338448	NA	-0.436397	NA	0.0548858	NA	0.953499	NA	0.462219	NA	3.41507	0.0929522	-2.15008	NA
ATP6V0B	NM_004047	8944	0.0397116	0.72298	-0.134066	0.0714187	-0.14166	0.03906	0.0321181	1	-0.0947091	0.265299	-0.124049	0.111872	0.0208081	0.938472	0.0501477	0.926111	-0.0175649	0.794431	-0.134099	0.62716
ATP6V0C	NM_001694	21196.9	0.135882	0.371085	-0.12331	0.463604	-0.203777	0.08086	0.0554157	1	-0.112	0.483899	-0.202472	0.111796	-0.0497044	0.90242	0.0407672	0.999179	0.0834285	0.402659	-0.247563	0.579255
ATP6V0CP3	NR_037141	4.76809	0.972501	NA	0.758987	NA	-1.01396	NA	-0.80045	NA	-0.351696	NA	-0.489288	NA	-0.0579484	NA	0.0796433	NA	0.562107	0.612394	-1.3239	NA
ATP6V0D1	NM_004691	14651.2	0.093979	0.348793	-0.0163966	0.93097	-0.0874027	0.324305	0.0229729	1	-0.0220148	0.897343	-0.0504627	0.704055	0.0111831	0.977919	0.039631	0.989185	0.2314	4.18e-05	-0.115656	0.680872
ATP6V0D2	NM_152565	0.253386	-1.90902	NA	-0.909735	NA	1.89076	NA	0.89164	NA	0	NA	0	NA	1.11966	NA	1.15728	NA	-1.87916	NA	1.77128	NA
ATP6V0E1	NM_003945	10953.6	-0.0122176	0.933736	-0.0164063	0.929512	0.0465975	0.653406	0.0507862	0.982884	-0.0896159	0.348453	-0.169272	0.0221833	-0.041428	0.852465	0.0382283	0.989185	0.332945	8.83e-10	-0.0771015	0.774496
ATP6V0E2	NM_001367794	7319.78	-0.0300879	0.894171	0.0960118	0.663845	0.0784027	0.652323	-0.0476969	1	-0.019524	0.949167	0.144542	0.395827	0.108927	0.696518	-0.0551391	0.996699	-0.540066	3.71e-09	0.0109055	0.989609
ATP6V0E2-AS1	NR_027040	533.278	-0.140626	0.56662	0.0550535	0.88795	0.0935519	0.696605	-0.102128	1	-0.235202	0.251673	0.141993	0.594773	0.17879	0.583204	-0.198405	0.606541	-0.287008	0.0314877	-0.0942375	0.895522
ATP6V1A	NM_001690	9326.7	-0.104294	0.452982	0.00294042	0.991723	0.0440317	0.774605	-0.0632026	1	0.139879	0.242299	0.070486	0.682085	-0.0687786	0.789887	0.000613903	0.999686	0.911042	6.44e-37	0.244453	0.50158
ATP6V1B1	NM_001692	0.264637	0	NA	1.88303	NA	0	NA	-1.93606	NA	-1.63215	NA	-2.63155	NA	-0.803733	NA	0	NA	2.42343	NA	-1.56909	NA
ATP6V1B1-AS1	NR_110273	0.772731	1.92743	NA	2.9939	NA	-1.98058	NA	-3.04702	NA	1.24665	NA	-0.153868	NA	-0.738347	NA	0.662125	NA	1.83594	NA	-0.679973	NA
ATP6V1B2	NM_001693	9339.55	0.264983	7.5e-08	-0.0298992	0.82409	-0.0751904	0.294958	0.219692	2.91e-05	0.236207	2.69e-06	-0.0934002	0.213627	-0.0826411	0.377138	0.246966	1.26e-06	0.0734469	0.155102	-0.0284874	0.919979
ATP6V1C1	NM_001695	3212.79	-0.0777293	0.747656	-0.114707	0.663845	0.0485245	0.840706	0.0855017	1	0.0176882	0.961235	-0.0693923	0.811145	-0.0747653	0.875359	0.0123151	0.999179	0.232665	0.0512342	0.0956338	0.872559
ATP6V1C2	NM_144583	180.601	0.0633155	0.878539	0.163517	0.697773	0.0365976	0.930457	-0.063604	1	-0.00679882	0.991322	0.245724	0.422935	0.276538	0.439839	0.0240156	0.999179	0.18193	0.360715	-0.0697802	0.950625
ATP6V1D	NM_015994	3205.34	-0.0441947	0.816	-0.046552	0.850192	-0.00416645	0.98514	-0.00180916	1	-0.108012	0.490391	-0.186362	0.141054	-0.0456943	0.910036	0.0326559	0.999179	0.176274	0.0480927	-0.0635555	0.89304
ATP6V1E1	NM_001696	8849.32	0.00310547	0.978498	-0.00714013	0.955781	0.046574	0.485692	0.0568196	0.739414	-0.00576513	0.963267	-0.0727333	0.268643	-0.0153355	0.94011	0.0516327	0.764861	0.114861	0.00467174	-0.00855871	0.974958
ATP6V1E2	NM_001371282	425.612	0.0849138	0.701592	-0.0225614	0.948164	-0.195785	0.211039	-0.0883095	1	-0.0237513	0.94332	-0.0202416	0.958397	-0.048926	0.924524	-0.0524357	0.999179	0.0499699	0.7049	-0.108339	0.834511
ATP6V1F	NM_004231	11326.3	0.0959569	0.35073	0.0166312	0.931321	0.0502506	0.6395	0.129576	0.2392	-0.0180391	0.919746	-0.0405193	0.787795	0.0425095	0.857902	0.0649897	0.860795	-0.0758013	0.250222	-0.113659	0.695068
ATP6V1FNB	NM_001195150	102.418	0.00507895	0.991664	-0.172083	0.708323	-0.0550026	0.89586	0.12216	1	-0.257414	0.435672	-0.445912	0.0978999	-0.342607	0.369676	-0.154109	0.973689	0.104769	0.638601	-0.262228	0.765758
ATP6V1G1	NM_004888	5273.09	-0.0304117	0.84927	-0.0712877	0.65958	-0.0326696	0.824175	0.00820635	1	-0.0799615	0.560734	-0.0446414	0.801862	-0.037826	0.909435	-0.073146	0.883742	0.0595277	0.465049	-0.0492445	0.899153
ATP6V1G2	NM_130463	137.192	-0.100212	0.787308	0.0272858	0.960787	0.129446	0.682735	0.00194748	1	-0.125529	0.7496	-0.0495915	0.923721	0.20184	0.660173	0.125903	0.976743	0.181321	0.341287	-0.0250885	0.984832
ATP6V1G2-DDX39B	NR_037853	33904.4	0.097565	0.260188	-0.0518885	0.670242	-0.118685	0.093177	0.0307683	1	-0.00311664	0.986474	-0.0924116	0.286456	-0.067965	0.61984	0.0213299	0.999179	0.0170732	0.797163	-0.100363	0.695068
ATP6V1G3	NM_133326	0.811441	-2.07403	NA	-1.09385	NA	0.863684	NA	-0.11646	NA	-0.691968	NA	0.282606	NA	0.108569	NA	-0.865974	NA	-0.594043	NA	1.3827	NA
ATP6V1H	NM_015941	4526.21	-0.0831904	0.539008	-0.0857622	0.572372	0.00553304	0.976502	0.00810485	1	0.0769702	0.591024	-0.13136	0.256772	-0.0901175	0.636981	0.118212	0.533929	0.192197	0.00810721	0.16044	0.663596
ATP7A	NM_000052	3904.6	-0.0638402	0.773765	0.108721	0.637791	0.163822	0.290592	-0.00873943	1	0.118062	0.545507	0.178478	0.282734	0.041926	0.932786	-0.0184895	0.999179	1.09638	1.07e-30	0.182152	0.708327
ATP7B	NM_001243182	69.8518	-0.105848	0.831057	0.194715	0.719212	0.113515	0.801456	-0.187048	0.991253	0.247109	0.658941	0.155034	0.818785	-0.399458	0.516164	-0.307383	0.835003	-1.27063	9.46e-08	0.353259	0.759457
ATP8A1	NM_001105529	12918.6	-0.195287	0.428466	0.19137	0.47638	0.433582	0.00991908	0.0469246	1	0.203285	0.400067	0.225858	0.340478	0.0352423	0.966534	0.0126688	0.999179	-0.341622	0.0158394	0.398834	0.575807
ATP8A2	NM_016529	23.2906	-0.184979	0.844927	0.260789	NA	0.166563	0.851664	-0.279204	1	0.0120785	0.994098	0.119487	NA	-0.104873	NA	-0.212282	0.999179	-0.602606	0.201668	0.197343	0.941404
ATP8B1	NM_005603	166.431	0.794171	0.594392	2.44768	0.00262944	1.49569	0.0353746	-0.157807	1	0.0953	0.883662	0.643751	0.0309987	0.49249	0.181761	-0.0559611	0.999179	6.72097	1.54e-29	-0.698644	0.798041
ATP8B2	NM_001370597	7454.45	-0.0790945	0.631368	-0.0462786	0.848994	-0.0534821	0.742831	-0.086298	0.933994	-0.0619831	0.753895	0.0746552	0.692483	0.0122564	0.983361	-0.124382	0.630013	0.605038	1.72e-14	0.0174332	0.975948
ATP8B3	NM_138813	206.806	0.012842	0.983557	-0.0385132	0.959075	-0.127387	0.783936	-0.0760316	1	0.0110957	0.989408	0.223284	0.674248	0.150939	0.88362	-0.0612492	0.999179	-0.681308	0.00410646	-0.00138397	0.999057
ATP8B4	NR_073598	24.0437	0.230456	0.882944	-0.0239632	NA	0.0579198	0.972107	0.312338	1	-0.283149	0.847355	-0.319323	NA	-0.29455	NA	-0.258376	0.999179	2.5121	2.72e-05	-0.513719	0.871015
ATP8B5P	NR_003582	14.044	-0.230669	NA	0.375754	NA	0.434935	NA	-0.171488	1	-0.0818552	NA	0.287398	NA	0.461707	NA	0.0924545	0.999179	-0.94419	0.175833	0.148994	0.971992
ATP9A	NM_006045	101	-0.207781	0.770229	0.164528	0.863624	0.247571	0.685863	-0.124738	1	0.0595095	0.954856	0.594061	0.251782	0.337328	0.734499	-0.197223	0.993961	0.0861882	0.837311	0.267579	0.876945
ATP9B	NM_198531	3283.46	-0.00609446	0.963007	-0.00417747	0.98192	0.0136594	0.902102	0.0117424	1	-0.0103348	0.94635	0.048164	0.643717	-0.0213529	0.928726	-0.0798518	0.529109	0.134451	0.00607272	-0.00395691	0.993183
ATPAF1	NM_022745	6228.92	-0.00993599	0.947183	0.0518026	0.721385	0.0261906	0.831369	-0.035548	1	0.0831256	0.418531	0.032306	0.833798	-0.0160101	0.964599	0.0348095	0.994484	0.0347343	0.619978	0.0933708	0.738308
ATPAF2	NM_145691	2482	-0.0289492	0.858068	-0.0521249	0.784452	-0.00322088	0.986368	0.0199548	1	0.0200261	0.924532	0.00871665	0.974543	0.0300133	0.929862	0.0413227	0.995306	-0.0209416	0.814689	0.0493422	0.899153
ATPSCKMT	NM_199133	1266.96	-0.173209	0.409555	0.0465172	0.902471	0.179885	0.320531	-0.0398412	1	0.0591064	0.855523	0.0738237	0.806872	0.0088272	0.989259	-0.00589006	0.999179	-0.231138	0.0644873	0.23263	0.688129
ATR	NM_001184	8256.23	0.0146767	0.960044	-0.0148942	0.967615	0.072157	0.735344	0.101728	0.974483	0.306365	0.0311903	0.174835	0.362106	-0.0522084	0.922941	0.0793223	0.985712	-0.0750815	0.566527	0.291996	0.614092
ATRAID	NM_016085	5667.05	0.0564916	0.662034	0.107459	0.338404	0.0524753	0.653406	0.00150759	1	-0.0627109	0.64018	0.0407216	0.800882	0.0925323	0.538987	-0.0109002	0.999179	0.303729	9.64e-07	-0.118877	0.699924
ATRIP	NM_130384	7556.23	0.130416	0.434794	0.0137111	0.965014	-0.120064	0.420608	-0.00335974	1	0.0549977	0.820633	0.0476294	0.852062	0.0046119	0.992857	0.0119803	0.999179	-0.1552	0.121027	-0.0750688	0.880137
ATRIP-TREX1	NR_153405	7194.32	0.129601	0.447726	0.0200529	0.948151	-0.116288	0.453905	-0.00673991	1	0.0467522	0.857731	0.0559774	0.819945	0.0122144	0.98387	0.00298929	0.999179	-0.169966	0.0937733	-0.0824995	0.866158
ATRN	NM_139322	2620.23	0.0965166	0.397504	0.115596	0.286824	0.00721291	0.964747	-0.0118665	1	-0.0209608	0.913567	0.122778	0.227398	0.074383	0.689306	-0.069356	0.865097	0.0679854	0.353794	-0.117166	0.703383
ATRNL1	NM_001276282	301.519	-0.503805	0.0636705	0.066875	0.914059	0.365147	0.193459	-0.205533	0.923561	-0.315557	0.415724	0.0335098	0.966882	0.135166	0.89119	-0.213901	0.909711	-2.08025	2.54e-27	0.188568	0.857351
ATRX	NM_000489	13444.4	-0.200468	0.395674	-0.0351498	0.935112	0.180438	0.391391	0.0151197	1	0.109369	0.722371	0.0970916	0.770356	-0.0313534	0.968827	-0.0190759	0.999179	-0.018356	0.91684	0.310066	0.65537
ATXN1	NM_001128164	8283.2	-0.333468	3.85e-06	0.294889	9.19e-05	0.356501	8.55e-07	-0.271856	0.000506549	-0.22673	0.00470705	0.374787	1.73e-07	0.293228	0.000167795	-0.308289	3.56e-05	0.295459	6.39e-06	0.107054	0.7388
ATXN10	NM_013236	14597.3	-0.0413137	0.837274	0.0573763	0.819822	0.0952974	0.532223	-0.00339261	1	0.0529939	0.820253	0.106032	0.558632	0.0125673	0.983705	-0.0404708	0.999179	-0.443995	2.85e-07	0.0946201	0.826348
ATXN1L	NM_001137675	7848.41	0.0955119	0.162024	-0.00562333	0.969533	-0.0656113	0.33287	0.0355239	1	0.157199	0.00196808	-0.013034	0.924369	-0.0564734	0.620941	0.11376	0.0878913	0.232194	4.89e-08	0.0619962	0.765905
ATXN2	NM_001310121	7214.07	0.105385	0.381449	-0.0490855	0.792341	-0.19668	0.0220588	-0.0422095	1	0.0200218	0.922443	-0.00667927	0.979744	-0.101822	0.520565	-0.0751208	0.859248	-0.0183973	0.833484	-0.0850202	0.795227
ATXN2-AS	NR_146497	48.5557	0.140227	0.812427	0.348863	0.51048	0.194594	0.685863	-0.0140412	1	-0.188091	0.776313	-0.0515476	NA	0.2856	NA	0.149056	0.998214	0.00600718	0.988304	-0.327933	0.79956
ATXN2L	NM_148415	44547.7	0.18923	0.0644105	-0.0320886	0.885846	-0.168743	0.0856525	0.0525762	1	0.00548651	0.982349	-0.0038055	0.988633	-0.00352045	0.99305	0.00577156	0.999179	-0.0762626	0.356735	-0.183403	0.62716
ATXN3	NM_004993	2259.55	-0.177618	0.265761	-0.060533	0.82201	0.0721782	0.686056	-0.0449072	1	-0.119103	0.507014	-0.0051295	0.988532	0.0255577	0.965799	-0.0884158	0.928359	-0.0146072	0.907788	0.0587745	0.918643
ATXN3L	NM_001135995	0.0933213	0.88344	NA	0	NA	-0.936547	NA	0	NA	1.50372	NA	0	NA	-1.48403	NA	0	NA	-0.0323574	NA	0.620652	NA
ATXN7	NM_001177387	4838.16	0.224799	0.000388823	-0.023212	0.894924	-0.184909	0.0055573	0.0631019	0.896326	0.324411	1.58e-08	0.00615499	0.977939	-0.190858	0.00708614	0.127397	0.193476	-0.0444874	0.497585	0.0999372	0.707743
ATXN7L1	NM_001318229	233.875	0.0628078	0.913239	0.486966	0.165571	0.0336937	0.955197	-0.390464	0.538839	-0.22163	0.644257	0.0635162	0.929004	0.0225978	0.987302	-0.262549	0.82921	0.611631	0.00895125	-0.284093	0.79598
ATXN7L2	NM_001350175	1182.02	0.0436324	0.815211	-0.330305	0.000791117	-0.446213	8.77e-07	-0.0722755	0.998992	-0.159517	0.229719	-0.308977	0.00311565	-0.172469	0.258928	-0.0230093	0.999179	-0.292558	0.000493258	-0.202835	0.650333
ATXN7L3	NM_020218	12562.6	0.0808234	0.101946	-0.183242	4.29e-07	-0.239502	4.04e-12	0.024564	1	-0.0631737	0.224564	-0.176225	1.44e-06	-0.107756	0.0157302	0.00529616	0.999179	0.0790203	0.023618	-0.143695	0.160784
ATXN7L3B	NM_001136262	10298.8	-0.0351317	0.653152	-0.0605969	0.39797	-0.081664	0.134344	-0.0561988	0.720931	-0.100463	0.0527883	-0.101294	0.0613051	-0.0737478	0.307691	-0.0729171	0.40928	0.00289637	0.957562	-0.0650401	0.72584
ATXN8OS	NR_002717	0.0742737	0	NA	0	NA	1.69948	NA	1.66197	NA	0	NA	0	NA	0	NA	0	NA	-0.032282	NA	-0.0754772	NA
AUH	NM_001698	519.906	-0.0322964	0.885441	-0.0693826	0.787288	-0.0867318	0.610955	-0.0496455	1	-0.118994	0.539347	-0.247072	0.0859733	-0.0786927	0.838083	0.0493855	0.999179	-0.530735	1.58e-08	-0.0863576	0.864556
AUNIP	NM_001287490	981.26	-0.053677	0.740666	-0.151785	0.215357	-0.19799	0.0496142	-0.0998818	0.809676	-0.182849	0.104045	-0.120741	0.394722	-0.0289811	0.945426	-0.0910886	0.846022	-0.491514	4.75e-11	-0.128834	0.73202
AUP1	NM_181575	18139.2	0.12132	0.190555	-0.0290101	0.866626	-0.124914	0.125603	0.0254162	1	-0.0377608	0.79827	-0.0453727	0.750639	-0.00311066	0.992506	0.0045013	0.999179	0.0440678	0.524	-0.158747	0.604042
AURKA	NM_198437	9800.5	0.0447478	0.826887	0.0592657	0.816239	-0.0579692	0.744993	-0.0724871	1	0.0850283	0.668694	0.223388	0.0880386	-0.0112092	0.984307	-0.149569	0.547663	-0.66572	1.51e-14	0.0406453	0.943964
AURKAIP1	NM_017900	14068.7	0.0786759	0.643462	0.0400997	0.876351	-0.0257025	0.894118	0.0128737	1	-0.00409373	0.989168	0.01305	0.967608	0.072316	0.814649	0.0551722	0.99388	-0.289947	0.00062187	-0.0824035	0.847068
AURKAP1	NR_001587	217.066	-0.348636	0.243297	-0.270605	0.426778	0.0720281	0.85484	-0.00600297	1	-0.294923	0.325803	-0.317577	0.289892	-0.157549	0.810332	-0.134895	0.983954	-0.0135581	0.956481	0.0539058	0.966235
AURKB	NM_001284526	12567.3	0.0344043	0.871609	0.0314935	0.91427	-0.035057	0.857948	-0.0321462	1	0.0339952	0.900729	0.1393	0.387439	0.0798423	0.802661	-0.025462	0.999179	-0.616623	1.01e-12	-4.58e-05	0.999751
AURKC	NM_001015879	56.482	0.0309038	0.963824	-0.0229576	0.980018	0.130459	0.794375	0.18432	1	-0.171115	0.742662	-0.558535	NA	0.074782	NA	0.462203	0.32508	0.751957	0.00150146	-0.201668	0.86946
AUTS2	NM_015570	12833.9	0.342835	0.0973245	-0.0576674	0.897924	-0.188086	0.404056	0.212416	0.67814	0.254131	0.261726	-0.0982773	0.78541	-0.121888	0.810332	0.230521	0.556599	-1.44751	1.45e-27	-0.0883755	0.916126
AVEN	NM_020371	2405.03	0.00581911	0.980757	0.0230023	0.931321	0.00443014	0.98347	-0.012753	1	-0.0264626	0.914876	0.0776277	0.671819	0.0592333	0.854532	-0.044857	0.999179	-0.0126685	0.906936	-0.0319691	0.952482
AVIL	NM_006576	82.6077	-0.431423	0.392925	-0.0470581	0.959075	0.234403	0.655412	-0.149961	1	3.82e-05	1	-0.403026	0.474427	-0.459708	0.50508	-0.0566435	0.999179	-0.633019	0.0351743	0.431647	0.755354
AVL9	NM_015060	7480.28	0.0206631	0.798987	-0.0525201	0.47196	-0.0920749	0.0631372	-0.0188918	1	0.0432279	0.547113	0.0147237	0.891607	-0.0386111	0.738131	-0.0101069	0.999179	0.175733	1.16e-06	0.0228478	0.918052
AVP	NM_000490	0.171769	0	NA	0	NA	0	NA	0	NA	-3.00898	NA	-3.04661	NA	0	NA	0	NA	2.83867	NA	-2.94613	NA
AVPI1	NM_021732	122.443	-0.150557	0.713978	-0.105183	0.853612	-0.17083	0.635927	-0.216204	0.917187	-0.148775	0.7607	0.0931915	0.871957	-0.0811234	0.938472	-0.32309	0.590504	-0.439071	0.0352475	0.0020648	0.999057
AVPR1A	NM_000706	1.17168	-0.896119	NA	0.267902	NA	0.171452	NA	-0.992551	NA	0.790913	NA	0.548403	NA	0.0285773	NA	0.271084	NA	-0.0260766	0.993216	1.68751	NA
AVPR1B	NM_000707	0.330017	0.926729	NA	1.66704	NA	0.811528	NA	0.071282	NA	-2.03238	NA	-2.07001	NA	1.11972	NA	1.15734	NA	1.86155	NA	-2.95822	NA
AVPR2	NM_001146151	1.91138	-1.40538	NA	0.0762071	NA	0.297836	NA	-1.18374	NA	-4.00399	NA	0.135037	NA	2.96241	NA	-1.17657	NA	-0.0976526	0.95798	-2.59892	NA
AWAT1	NM_001013579	0.0856027	0	NA	0	NA	0.971353	NA	0.933853	NA	0	NA	0.785677	NA	0	NA	-0.766053	NA	-0.0322521	NA	-0.0755025	NA
AWAT2	NM_001002254	0.70523	1.16554	NA	-0.987055	NA	-0.326799	NA	1.82567	NA	2.70324	NA	0.785657	NA	0.90063	NA	2.8181	NA	-0.99405	NA	1.53866	NA
AXDND1	NM_144696	25.3834	0.487706	0.501657	0.57837	NA	-0.00845692	0.992971	-0.0991204	1	0.177668	0.857024	-0.271047	NA	0.060878	NA	0.509593	0.696591	0.575128	0.177283	-0.30995	0.876361
AXIN1	NM_181050	6659.8	-0.0380137	0.790765	-0.106277	0.373349	-0.127318	0.180299	-0.0590548	0.98417	-0.221324	0.0055481	-0.112366	0.318367	0.0378212	0.902938	-0.0711373	0.874307	-0.24908	0.000136076	-0.183013	0.593503
AXIN2	NM_001363813	58.9319	-0.115371	0.868629	0.401448	0.489013	0.296464	0.56657	-0.220354	1	-0.696331	0.262228	0.290578	NA	0.994135	NA	0.00722561	0.999373	-1.75865	5.51e-08	-0.580533	0.72518
AXL	NM_021913	16.2942	-2.35422	0.164522	-1.24076	NA	-0.350255	NA	-1.46371	0.851368	-1.43455	0.27405	-1.61656	NA	0.301451	NA	0.483465	0.996152	2.61878	0.00221056	0.919783	0.85001
AZGP1	NM_001185	2.25244	-0.295664	NA	-2.02522	NA	0.557407	NA	2.28694	NA	0.803253	NA	0.820532	NA	1.09609	NA	1.07881	NA	-1.46892	0.393597	1.1	NA
AZGP1P1	NR_036679	0.27222	0.883481	NA	0.936421	NA	0.0250862	NA	-0.0278503	NA	0	NA	2.30779	NA	1.11967	NA	-1.32631	NA	-0.0323774	NA	-1.02181	NA
AZI2	NM_001134432	1652.29	-0.0226434	0.899929	-0.129475	0.315401	-0.083537	0.506075	0.0232949	1	0.124914	0.29126	-0.0955811	0.497765	-0.160074	0.184235	0.0604215	0.964829	0.245306	0.000893235	0.147829	0.682097
AZIN1	NM_148174	23816.2	-0.215246	0.23108	-0.0686958	0.824891	0.15602	0.363167	0.00947002	1	-0.0731566	0.788279	-0.01985	0.959883	-0.0217428	0.97708	-0.0750494	0.989185	0.364304	0.000919865	0.142319	0.787643
AZIN1-AS1	NR_126339	164.647	0.0109268	0.981354	0.0734247	0.884611	0.190825	0.473297	0.128327	1	-0.286605	0.206955	-0.0784826	0.841224	0.281379	0.307496	0.0732567	0.999179	0.756366	6.4e-07	-0.29731	0.696344
AZIN2	NM_001301825	16.2852	0.260667	0.789787	0.314909	NA	-0.238929	NA	-0.293171	1	0.0409525	0.97859	0.346891	NA	0.347138	NA	0.0411997	0.999179	-0.084894	0.889173	-0.219572	0.938129
AZU1	NM_001700	3.62886	0.70737	NA	-3.24703	NA	-1.55483	NA	2.39951	NA	-1.75514	NA	-0.815549	NA	0.922238	NA	-0.0173516	NA	2.42581	0.0398567	-2.46316	NA
B2M	NM_004048	311546	0.0317613	0.867688	0.000306922	0.999388	0.14275	0.238481	0.174205	0.273232	0.11183	0.45089	-0.0567945	0.784038	-0.0189863	0.9697	0.149638	0.431522	0.633411	3.54e-16	0.0803403	0.844796
B3GALNT1	NM_003781	491.025	0.128497	0.76387	0.0755627	0.905491	0.156632	0.667306	0.209566	0.925425	0.330933	0.326365	-0.0329708	0.964916	-0.230186	0.696446	0.133718	0.990535	-0.725542	0.000274125	0.202687	0.836604
B3GALNT2	NM_152490	3570.81	-0.207281	0.0778233	-0.00453634	0.988836	0.162125	0.166585	-0.0406191	1	-0.0191736	0.939956	0.0708911	0.70675	0.0307854	0.942174	-0.0592794	0.984116	0.0400869	0.69106	0.188366	0.660423
B3GALT1	NM_020981	0.155553	0.883421	NA	0	NA	-0.936568	NA	0	NA	-0.138356	NA	-0.17598	NA	-0.803706	NA	-0.766087	NA	0.929321	NA	-1.0216	NA
B3GALT2	NM_003783	0.633891	2.13855	NA	2.6061	NA	-3.15335	NA	-3.62088	NA	-1.10022	NA	-1.13784	NA	1.11976	NA	1.15738	NA	-0.0325804	NA	-3.23752	NA
B3GALT4	NM_003782	694.413	-0.177582	0.381713	-0.0965067	0.744959	0.0746554	0.740375	-0.0064204	1	-0.156197	0.455001	-0.0783589	0.787795	0.0804157	0.866043	0.00257749	0.999373	-0.0931047	0.489541	0.0216646	0.978062
B3GALT5	NM_001356339	1.66531	0	NA	0	NA	2.93136	NA	2.89386	NA	0.378364	NA	0.487624	NA	-0.0164829	NA	-0.125742	NA	3.04533	0.12944	0.441679	NA
B3GALT5-AS1	NR_026543	0.918241	0.561888	NA	-0.848968	NA	1.07964	NA	2.49046	NA	0.127889	NA	-2.63326	NA	-0.0586711	NA	2.70242	NA	0.0537444	NA	-0.431891	NA
B3GALT6	NM_080605	3433.74	0.0508151	0.772666	-0.134171	0.351247	-0.160642	0.165085	0.0243448	1	-0.0635822	0.743186	-0.0891891	0.604897	-0.0521573	0.88362	-0.0265504	0.999179	-0.395215	5.67e-07	-0.114087	0.766648
B3GAT1	NM_018644	3.14615	0.516349	NA	-1.06005	NA	-0.513589	NA	1.0628	NA	-0.545233	NA	0.28265	NA	1.71126	NA	0.883384	NA	-0.0437888	0.980005	-1.06093	NA
B3GAT2	NM_080742	35.3035	-0.397781	0.517408	-0.00630691	0.996666	0.2064	0.749767	-0.185074	1	-0.108266	0.913567	-0.136728	NA	0.0801119	NA	0.108574	0.999179	-0.28431	0.452465	0.289742	0.865665
B3GAT3	NM_012200	4435.78	0.0434034	0.725597	-0.0794399	0.499957	-0.0256113	0.837579	0.097232	0.573783	-0.0647099	0.579957	-0.0657771	0.585354	-0.00804548	0.983772	-0.00697828	0.999179	0.168454	0.00459663	-0.107806	0.702396
B3GLCT	NM_194318	102.574	-0.0671993	0.882756	-0.296728	0.421044	-0.214448	0.517989	0.0150813	1	-0.0747264	0.899818	0.0145211	0.984881	-0.119233	0.897032	-0.208481	0.888079	-0.29511	0.168413	-0.00719862	0.997834
B3GNT10	NR_027442	1198.72	-0.123764	0.564176	0.0479346	0.888763	0.127672	0.490617	-0.0440272	1	-0.0184033	0.95863	-0.128208	0.567862	-0.101009	0.785519	0.0087955	0.999179	0.224968	0.0536731	0.105608	0.85001
B3GNT2	NM_006577	13336.8	-0.0349916	0.817817	-0.0538736	0.765382	0.0207189	0.892286	0.0396009	1	0.0244571	0.904882	-0.059451	0.702923	-0.0865499	0.631529	-0.00264181	0.999179	0.315964	1.7e-06	0.0597232	0.865665
B3GNT3	NM_014256	4.12992	-0.690291	NA	-0.173008	NA	1.34766	NA	0.830382	NA	0.79492	NA	-0.0837011	NA	-0.695988	NA	0.18263	NA	0.94688	0.468064	1.48491	NA
B3GNT4	NM_001330492	36.8017	0.069065	0.939873	-0.179008	0.864736	-0.135297	0.858225	0.112776	1	-0.222363	0.80522	0.220237	NA	0.153763	NA	-0.288837	0.961715	0.0158634	0.97543	-0.290975	0.875977
B3GNT5	NM_032047	1.90039	0.171679	NA	0.443652	NA	-0.269319	NA	-0.541287	NA	0.234907	NA	-1.91003	NA	-0.09265	NA	2.05226	NA	2.2318	0.280748	0.0627498	NA
B3GNT6	NM_138706	1.16635	-0.0500383	NA	1.3843	NA	2.38455	NA	0.950255	NA	-1.22197	NA	-2.17835	NA	0.191602	NA	1.14797	NA	2.85422	0.249958	-1.17125	NA
B3GNT7	NM_145236	2878.09	-0.108252	0.692252	0.256766	0.229799	0.33358	0.0555666	-0.0314386	1	-0.503015	0.00114381	0.211737	0.362527	0.41337	0.0218217	-0.301381	0.203042	-0.458185	0.000537615	-0.394474	0.568335
B3GNT8	NM_198540	67.1889	-0.816445	0.048406	-0.0309137	0.972933	0.899616	0.0148903	0.114085	1	-0.484103	0.186226	0.161845	0.785455	0.365072	0.520084	-0.280876	0.81223	1.13183	7.65e-06	0.332579	0.799654
B3GNT9	NM_033309	1376.82	-0.0874656	0.590128	-0.188285	0.131695	-0.133772	0.296904	-0.0329533	1	-0.147567	0.270191	-0.0164535	0.957566	0.0780388	0.781023	-0.0530745	0.99388	0.0725864	0.455387	-0.0598158	0.898816
B3GNTL1	NM_001009905	498.231	0.0740013	0.792435	-0.0989131	0.777762	-0.0889724	0.719601	0.0839419	1	-0.0110455	0.98097	0.0884961	0.793675	0.163757	0.665164	0.0642151	0.999179	-0.635901	8.51e-07	-0.0847572	0.912754
B4GALNT1	NM_001478	43.8007	-0.0401089	0.970494	-0.807919	0.246174	-0.604194	0.3525	0.163615	1	-0.505931	0.39814	-0.128558	NA	-0.0446363	NA	-0.42201	0.793423	1.62988	5.72e-06	-0.465481	0.79467
B4GALNT2	NM_001159388	0.366328	-1.90948	NA	-0.910186	NA	1.70238	NA	0.703221	NA	-1.10021	NA	-1.13783	NA	2.51981	NA	2.55743	NA	-0.917958	NA	0.81022	NA
B4GALNT3	NM_173593	1335.2	0.0474523	0.78159	-0.0523408	0.813743	-0.11176	0.365169	-0.011967	1	-0.109186	0.389051	-0.143691	0.212051	-0.0425247	0.900639	-0.00801936	0.999179	1.05032	1.53e-49	-0.15636	0.675669
B4GALNT4	NM_178537	20.8325	0.300877	0.816	-0.0197414	NA	-0.672594	NA	-0.351976	1	0.258858	0.790167	0.356276	NA	0.190384	NA	0.0929659	0.999179	2.16706	1.54e-05	-0.0419023	0.992957
B4GALT1	NM_001497	26313.9	-0.207	0.00023544	-0.0940029	0.250704	-0.0417105	0.648036	-0.154708	0.0208451	-0.158422	0.00946144	-0.113326	0.124248	-0.0157906	0.9557	-0.0608869	0.795247	0.427949	9.49e-20	0.0488739	0.844796
B4GALT1-AS1	NR_108109	65.2145	-0.441416	0.279674	0.0829967	0.9126	0.150196	0.757852	-0.374217	0.624232	0.307818	0.398745	-0.0492209	0.946346	-0.14676	0.858417	0.210279	0.902866	0.418733	0.0788525	0.749485	0.452987
B4GALT2	NM_001005417	6056.44	0.0713879	0.547157	-0.0920722	0.436396	-0.140614	0.0971379	0.0228462	1	-0.0658844	0.607234	0.0122201	0.957821	0.0398138	0.88362	-0.0382907	0.994484	-0.157344	0.0138281	-0.136933	0.670748
B4GALT3	NM_003779	6472.23	0.191689	0.0222694	-0.0973596	0.420518	-0.209777	0.00660392	0.0792715	0.845546	-0.0181764	0.924532	-0.069345	0.603243	0.0198526	0.956795	0.0710212	0.850549	0.514892	1.45e-17	-0.209518	0.465128
B4GALT4	NM_003778	2338.54	0.161413	0.262771	-0.0333016	0.905147	0.0441242	0.802679	0.238839	0.0591139	0.296966	0.00302516	-0.0222597	0.935239	-0.0529525	0.885433	0.266273	0.019084	0.448847	7.11e-08	0.135811	0.739512
B4GALT4-AS1	NR_046574	2.17182	2.26256	NA	1.18676	NA	-1.36157	NA	-0.285782	NA	2.77423	NA	1.29692	NA	-0.0847895	NA	1.3925	NA	-1.60764	0.511537	0.512196	NA
B4GALT5	NM_004776	7054.24	0.327451	1.38e-18	0.197856	1.8e-06	0.15632	0.000227658	0.285915	2.24e-14	0.107623	0.028175	0.0738442	0.223135	0.14806	0.0013258	0.181839	1.28e-05	0.0702994	0.0878614	-0.219529	0.00428592
B4GALT6	NM_004775	5096.64	-0.244096	0.0966736	-0.110542	0.61992	-0.00505968	0.984632	-0.138614	0.76164	-0.0590536	0.820719	-0.0561356	0.832579	-0.134421	0.601518	-0.137339	0.717356	0.266273	0.00922587	0.185302	0.701235
B4GALT7	NM_007255	2994.83	0.0798709	0.37977	-0.00469596	0.980018	-0.00192315	0.988774	0.0826438	0.606971	0.0442478	0.693483	0.119169	0.101014	0.121044	0.117816	0.0461225	0.928359	0.293322	2.34e-09	-0.0353101	0.900404
B4GAT1	NM_006876	845.328	-0.117186	0.40131	-0.0249564	0.922445	-0.00341041	0.987789	-0.0956401	0.851368	-0.143315	0.240268	0.260619	0.00582102	0.158106	0.243435	-0.245828	0.0143791	0.0524159	0.573548	-0.0258304	0.96257
B9D1	NM_001330149	271.14	0.194234	0.607303	0.00325499	0.996741	-0.0814699	0.842646	0.109509	1	-0.119485	0.792928	-0.121793	0.79037	0.00329442	0.998806	0.00560158	0.999179	1.01956	2.15e-08	-0.313278	0.727045
B9D2	NM_030578	651.283	-0.054922	0.829134	-0.130858	0.596145	-0.0861033	0.684455	-0.0101669	1	-0.0620871	0.838886	-0.123224	0.60788	0.0263944	0.969908	0.0875312	0.977429	-0.145337	0.250805	-0.00683047	0.995219
BAALC	NM_024812	2.61486	-0.0441212	NA	-0.782332	NA	-0.0603556	NA	0.677843	NA	1.06611	NA	-1.03209	NA	-0.220449	NA	1.87773	NA	1.44484	0.419798	1.11036	NA
BAALC-AS1	NR_109954	0.959664	-0.631132	NA	-0.212491	NA	0.620097	NA	0.201467	NA	-2.03182	NA	-2.06945	NA	0.158003	NA	0.195626	NA	-0.160999	NA	-1.40181	NA
BAALC-AS2	NR_027071	0.130965	0	NA	0.936469	NA	0	NA	-0.989567	NA	0	NA	0.78566	NA	1.11971	NA	0.195709	NA	-0.0324428	NA	-0.0751729	NA
BAAT	NM_001701	11.3312	0.358079	NA	0.151428	NA	0.102616	NA	0.309267	1	0.720773	NA	0.170166	NA	-0.549577	NA	0.00102974	1	-0.154651	0.840662	0.362918	NA
BABAM1	NM_014173	13618.5	0.0318007	0.889949	0.113633	0.588848	0.0593328	0.755247	-0.0224996	1	0.0658623	0.783743	0.143486	0.413559	0.0780305	0.829989	0.000406973	0.999926	-0.240943	0.015977	0.0344169	0.95851
BABAM2	NM_001329112	4091.93	0.0324995	0.7535	0.0475096	0.680759	0.0577629	0.471286	0.0427528	0.988712	-0.0153348	0.915814	-0.00394869	0.981458	0.0898858	0.318285	0.0784997	0.548624	0.164159	0.000677182	-0.0475173	0.844105
BABAM2-AS1	NR_028308	27.2084	0.281247	0.717766	-0.187442	NA	-0.535689	0.362954	-0.0670003	1	-0.353255	0.6506	-0.387969	NA	0.233754	NA	0.268468	0.983954	0.339899	0.426387	-0.634166	0.718914
BACE1	NM_012104	76.9589	-0.14809	0.74327	-0.491027	0.131357	-0.562559	0.0568903	-0.219623	0.964527	-0.472913	0.150853	-0.415861	0.249091	0.068646	0.961094	0.011593	0.999179	-0.245587	0.312697	-0.324541	0.756297
BACE1-AS	NR_037803	143.016	-0.243899	0.423773	-0.153761	0.711296	-0.00998155	0.982133	-0.10012	1	0.0740367	0.876662	-0.112033	0.792751	-0.211505	0.650333	-0.0254352	0.999179	-0.144572	0.463147	0.318275	0.696344
BACE2	NM_012105	13.6814	1.08748	NA	-0.0720934	NA	-1.03748	NA	0.122087	1	-0.445649	NA	-0.574924	NA	-0.194403	NA	-0.0651274	0.999179	0.845412	0.186581	-1.53271	0.60385
BACH1	NM_001186	3171.67	-0.197155	0.293541	-0.104318	0.695204	0.072353	0.738028	-0.0204843	1	0.0692234	0.80453	-0.0986224	0.693886	-0.0602405	0.906963	0.107605	0.909973	0.0271462	0.848773	0.266612	0.648238
BACH1-IT2	NR_046564	7.32293	0.139429	NA	-1.49991	NA	0.0530946	NA	1.69243	NA	0.780161	NA	0.472914	NA	-0.394793	NA	-0.0875463	NA	-0.245983	0.799942	0.640888	NA
BACH1-IT3	NR_146594	1.03655	-1.04317	NA	0.154281	NA	-0.719117	NA	-1.91654	NA	3.15391	NA	0	NA	-3.1343	NA	0	NA	-4.17819	0.171495	4.19995	NA
BACH2	NM_021813	106.674	-0.386547	0.37003	0.667793	0.0336115	0.808561	0.00538481	-0.245779	0.927869	0.190546	0.775275	0.201141	0.765171	-0.0172123	0.99057	-0.0278073	0.999179	-1.32524	1.62e-07	0.577326	0.667487
BAD	NM_032989	2993.62	-0.00116344	0.995875	-0.0129407	0.964141	-0.045069	0.796416	-0.0332918	1	-0.108112	0.49439	-0.0639823	0.758429	0.0205437	0.967842	-0.0235862	0.999179	0.134099	0.14835	-0.106651	0.794942
BAG1	NM_001172415	11787.7	0.0633345	0.564659	-0.0573768	0.666968	-0.0722786	0.433478	0.0484327	0.997385	-0.00599707	0.973511	-0.0499971	0.7045	-0.00565832	0.987302	0.0383418	0.989185	0.00505865	0.948377	-0.0689941	0.801513
BAG2	NM_004282	4425.9	-0.10311	0.263041	-0.0848754	0.408161	-0.0352286	0.745118	-0.0534628	0.957634	-0.0821502	0.400067	-0.066695	0.5512	-0.0839356	0.516289	-0.0993908	0.461689	-0.219265	5.48e-05	0.0212756	0.953484
BAG3	NM_004281	653.951	0.1012	0.824677	0.0545004	0.934421	-0.075625	0.863971	-0.0289254	1	-0.101818	0.862401	-0.202298	0.672721	-0.0169904	0.988876	0.0834893	0.999179	-1.74621	7.52e-19	-0.202823	0.846218
BAG4	NM_004874	3700.54	-0.10415	0.581148	-0.0448158	0.880555	-0.00540876	0.983037	-0.0647427	1	0.0660754	0.783912	0.0295337	0.923947	-0.0727306	0.848946	-0.0361888	0.999179	-0.0906747	0.422858	0.170483	0.715768
BAG5	NM_001015048	6804.47	-0.0389371	0.750761	-0.0313017	0.851678	0.0425182	0.695426	0.0348827	1	-0.00569362	0.97589	0.00716832	0.974543	0.00913183	0.982688	-0.00373011	0.999179	-0.341026	9.85e-10	0.0335267	0.923488
BAG6	NM_080703	41876.2	0.137214	0.233662	0.0464945	0.813075	-0.0822703	0.480546	0.0084488	1	-0.0188663	0.930011	0.00221246	0.992681	0.0356824	0.917172	0.0146037	0.999179	-0.0199921	0.824492	-0.155751	0.667487
BAGE	NM_001187	0	NA	NA	NA	NA	NA	NA	NA	NA	NA	NA	NA	NA	NA	NA	NA	NA	NA	NA	NA	NA
BAGE2	NM_182482	1.26302	-1.44479	NA	0.43686	NA	1.96948	NA	0.0878612	NA	-1.03153	NA	-1.41281	NA	0.488516	NA	0.869785	NA	0.70235	0.746518	0.413608	NA
BAGE3	NM_182481	1.26302	-1.44479	NA	0.43686	NA	1.96948	NA	0.0878612	NA	-1.03153	NA	-1.41281	NA	0.488516	NA	0.869785	NA	0.70235	0.746518	0.413608	NA
BAGE4	NM_181704	1.26302	-1.44479	NA	0.43686	NA	1.96948	NA	0.0878612	NA	-1.03153	NA	-1.41281	NA	0.488516	NA	0.869785	NA	0.70235	0.746518	0.413608	NA
BAGE5	NM_182484	0	NA	NA	NA	NA	NA	NA	NA	NA	NA	NA	NA	NA	NA	NA	NA	NA	NA	NA	NA	NA
BAHCC1	NM_001291324	26.6859	-0.471526	0.438798	-0.148407	NA	-0.0955211	0.905719	-0.41864	0.851124	0.464252	0.707347	-0.0329195	NA	-0.882975	NA	-0.385804	0.99388	-3.13006	4.56e-12	0.93598	0.675181
BAHD1	NM_014952	7043.5	-0.00277867	0.985642	-0.0961193	0.352589	-0.10263	0.232371	-0.00928926	1	-0.145243	0.0669007	-0.0950302	0.345164	-0.0395739	0.873579	-0.0897869	0.612492	-0.0966249	0.123789	-0.142181	0.644889
BAIAP2	NM_017450	187.65	-0.0806639	0.819439	-0.272895	0.324547	-0.0958148	0.758062	0.096416	1	-0.00526009	0.992411	-0.0578457	0.903873	-0.161446	0.750672	-0.108861	0.989185	-0.116257	0.534471	0.0757358	0.938129
BAIAP2-DT	NR_026857	41.102	-0.738512	0.215284	-0.499308	0.486962	-0.0887738	0.922792	-0.327978	0.992102	-1.16536	0.00710998	-0.585621	NA	-0.00493689	NA	-0.584678	0.571233	0.52097	0.169284	-0.426746	0.807189
BAIAP2L1	NM_018842	5882.78	-0.00206387	0.995938	0.0787803	0.867513	-0.0206315	0.960193	-0.101476	1	-0.0956801	0.820719	-0.0831232	0.852062	-0.0150613	0.988111	-0.0276181	0.999179	-1.05748	6.93e-12	-0.0933238	0.923488
BAIAP2L2	NM_025045	35.1435	-0.206752	0.831705	0.128858	0.926211	0.478125	0.501529	0.142515	1	-0.21356	0.82594	-0.233624	NA	-0.0940945	NA	-0.0740301	0.999179	1.30302	0.0011035	-0.00640962	0.999057
BAIAP3	NM_001199096	88.5395	-0.192133	0.717766	-0.00304342	0.997607	0.19919	0.668715	0.010101	1	-0.331914	0.405873	-0.185157	0.728191	0.0946296	0.934567	-0.0521273	0.999179	0.929734	7.37e-05	-0.139497	0.922729
BAK1	NM_001188	10060.3	0.256008	3.32e-05	0.191743	0.00553152	0.114916	0.147476	0.179181	0.0157573	0.106791	0.224381	-0.00438765	0.983197	0.0575506	0.749905	0.16873	0.03183	-0.239808	1.64e-05	-0.148897	0.61957
BAMBI	NM_012342	20.2592	-0.964135	0.13643	-1.02783	NA	-0.563798	NA	-0.500102	0.914924	-0.724945	0.584214	-0.242445	NA	-0.337757	NA	-0.820257	0.839052	-3.06507	9.96e-10	0.239514	0.946297
BANCR	NR_047671	4.96836	6.19427	NA	0	NA	0.0864243	NA	6.30591	NA	5.18348	NA	0	NA	-0.971179	NA	4.38832	NA	-0.03233	0.991537	-1.01052	NA
BANF1	NM_003860	11357.5	0.0874459	0.705667	0.0950995	0.737095	0.0202902	0.941917	0.0126366	1	0.0447663	0.890719	0.0762767	0.787481	0.0667086	0.895036	0.0351982	0.999179	-0.30184	0.00761125	-0.0423015	0.954513
BANF2	NM_001159495	0	NA	NA	NA	NA	NA	NA	NA	NA	NA	NA	NA	NA	NA	NA	NA	NA	NA	NA	NA	NA
BANK1	NM_017935	2260.2	0.0646621	0.768613	0.128851	0.53837	0.12978	0.426611	0.0655912	1	0.184228	0.264379	0.0286135	0.931032	-0.118565	0.694195	0.0370495	0.999179	-0.791837	4.57e-16	0.11988	0.807593
BANP	NM_001173540	2421.29	0.216347	0.0446878	-0.00793721	0.976243	-0.169048	0.121144	0.0552366	1	0.0355313	0.8723	-0.0456645	0.82584	-0.0133489	0.981144	0.0678469	0.953805	-0.13863	0.102345	-0.180456	0.660423
BAP1	NM_004656	15210.5	0.0451832	0.649381	0.0523542	0.642455	-0.0126496	0.914096	-0.0198205	1	-0.0223027	0.872169	0.0438148	0.701689	0.0549639	0.711515	-0.0111536	0.999179	0.00842406	0.897254	-0.0671826	0.776259
BARD1	NM_000465	4612.18	-0.143085	0.338346	0.099826	0.594451	0.18307	0.128501	-0.0598411	1	0.0455306	0.848482	0.159986	0.259676	0.0113105	0.983772	-0.103145	0.813013	-0.485647	6.18e-09	0.1889	0.673243
BARHL1	NM_020064	0	NA	NA	NA	NA	NA	NA	NA	NA	NA	NA	NA	NA	NA	NA	NA	NA	NA	NA	NA	NA
BARHL2	NM_020063	0.226561	0.88339	NA	0	NA	-0.936592	NA	0	NA	-0.104286	NA	-1.98286	NA	-0.72099	NA	1.15728	NA	1.77381	NA	-0.986762	NA
BARX1	NM_021570	0.829133	-1.5746	NA	-2.3419	NA	-0.795156	NA	-0.0278771	NA	-3.58138	NA	-1.76141	NA	2.52587	NA	0.705941	NA	0.131995	NA	-2.00637	NA
BARX1-DT	NR_144455	0	NA	NA	NA	NA	NA	NA	NA	NA	NA	NA	NA	NA	NA	NA	NA	NA	NA	NA	NA	NA
BARX2	NM_003658	5.65207	-0.542012	NA	0.593401	NA	0.69258	NA	-0.44283	NA	-0.697752	NA	-1.06662	NA	0.539291	NA	0.90816	NA	0.755385	0.432731	-0.155829	NA
BASP1	NM_006317	40143.7	0.0449311	0.857516	0.233532	0.153373	0.166723	0.31483	-0.0218778	1	-0.0118663	0.972396	0.0598168	0.83534	0.026078	0.967842	-0.0456051	0.999179	0.195294	0.0911577	-0.0565021	0.933221
BASP1-AS1	NR_027253	9.25846	-0.408502	NA	0.047903	NA	0.561214	NA	0.10481	1	0.139194	NA	0.157254	NA	0.502241	NA	0.484181	0.953805	0.340775	0.655415	0.547887	NA
BASP1P1	NR_033774	0.965369	-0.0398634	NA	1.39923	NA	0.0594829	NA	-1.3796	NA	-1.03151	NA	1.13795	NA	2.38831	NA	0.218876	NA	0.0690573	NA	-0.991162	NA
BATF	NM_006399	11728.7	-0.0438358	0.821622	0.134657	0.396873	0.169439	0.170213	-0.00905344	1	-0.0893939	0.615262	-0.248017	0.0314471	-0.0569634	0.875705	0.101659	0.822419	0.17933	0.0483893	-0.0452726	0.933221
BATF2	NM_138456	107.879	2.83503	9.47e-21	0.0175194	0.990112	-0.551689	0.168359	2.26582	5.03e-13	2.75783	1.41e-17	-0.238925	0.801862	-0.316703	0.711515	2.68005	6.8e-16	-0.521077	0.183681	-0.0768633	0.971992
BATF3	NM_018664	3860.37	0.643021	1.51e-09	0.0599902	0.842127	-0.0224167	0.928835	0.560614	4.11e-07	0.570047	1.7e-07	0.0256517	0.941217	-0.0370311	0.945426	0.507364	9.46e-06	0.0562451	0.659023	-0.0726344	0.900211
BAX	NM_138761	13387.2	-0.0669352	0.586191	-0.0222843	0.91404	0.0070528	0.965758	-0.0375981	1	-0.0682321	0.59535	-0.0962953	0.393804	0.0348241	0.907224	0.0628873	0.90657	0.284346	4.52e-06	-0.00098994	0.999057
BAZ1A	NM_013448	22694.8	0.474131	1.66e-10	-0.257907	0.00368603	-0.223077	0.0139563	0.50896	5.71e-12	0.60822	3.02e-17	-0.150949	0.185826	-0.258823	0.00514665	0.500347	2.03e-11	0.0435546	0.623113	0.134373	0.702396
BAZ1B	NM_032408	32008.3	0.0437756	0.668783	-0.0616337	0.564674	-0.142463	0.0266094	-0.0370537	1	-0.0162594	0.915157	0.00209899	0.990816	-0.0872933	0.393283	-0.105652	0.293322	-0.224419	5.33e-06	-0.0597193	0.806164
BAZ2A	NM_001300905	26394.1	0.224158	0.000153371	-0.0894272	0.335403	-0.232044	8.57e-05	0.0815408	0.648698	0.069663	0.470313	-0.0578252	0.602572	-0.0985491	0.318646	0.0289391	0.999179	0.439222	1.4e-18	-0.154173	0.575807
BAZ2B	NM_001329857	4073.41	0.0350805	0.854902	-0.0187909	0.944426	-0.0633883	0.682323	-0.00951689	1	0.205078	0.0673219	0.0402576	0.864454	-0.229214	0.0518316	-0.064394	0.974511	0.197828	0.0208275	0.170285	0.676657
BBC3	NM_001127240	1946.84	-0.0298554	0.940836	-0.248975	0.366963	-0.261374	0.253437	-0.0422544	1	-0.203747	0.45669	-0.372486	0.082729	-0.0492157	0.953393	0.119523	0.973482	1.26217	1.55e-18	-0.173667	0.8146
BBIP1	NM_001195305	1074.18	-0.101551	0.485941	-0.116008	0.444916	0.0247095	0.89083	0.0391669	1	0.0879742	0.55363	-0.0695598	0.687677	-0.0664839	0.804474	0.0910502	0.809119	0.354478	3.09e-06	0.189799	0.645323
BBOF1	NM_025057	206.997	-0.120403	0.741964	0.206559	0.564321	0.379814	0.101212	0.0528519	1	-0.293586	0.228715	0.0218164	0.970603	0.395423	0.0940378	0.0800199	0.999179	0.863651	4.92e-08	-0.173062	0.827132
BBOX1	NM_003986	0.120677	0	NA	0	NA	0.971336	NA	0.933835	NA	0.823285	NA	0	NA	0.15809	NA	1.15733	NA	-0.0322867	NA	0.886329	NA
BBOX1-AS1	NR_125768	2.7325	0.804971	NA	-0.636395	NA	-0.40398	NA	1.03738	NA	-0.746003	NA	-1.75463	NA	0.895627	NA	1.90424	NA	0.228312	0.882143	-1.55066	NA
BBS1	NM_024649	1726.81	0.0131562	0.952763	0.160169	0.256001	0.0744661	0.630859	-0.0725467	0.996172	-0.0695787	0.718255	0.0211002	0.938007	0.079636	0.778116	-0.0110429	0.999179	0.503143	7.05e-10	-0.0824704	0.846423
BBS10	NM_024685	1036.55	-0.3105	0.181074	0.0817698	0.848802	0.317652	0.120739	-0.0746171	1	-0.0090436	0.985904	0.174869	0.550819	0.037029	0.966534	-0.146883	0.898413	0.251242	0.110847	0.30167	0.677259
BBS12	NM_152618	203.631	-0.333953	0.123489	-0.0764773	0.853458	0.185745	0.429972	-0.0717309	1	-0.235293	0.292485	-0.157356	0.572897	0.0583675	0.932786	-0.0195694	0.999179	0.250162	0.0924976	0.0988688	0.899959
BBS2	NM_031885	1549.82	-0.0245811	0.903366	-0.0274738	0.919433	0.00210876	0.992742	0.00500147	1	-0.00815385	0.976345	0.000242963	0.999431	-0.00583922	0.98959	-0.014236	0.999179	-0.0767265	0.430154	0.0167356	0.976476
BBS4	NM_033028	1137.98	0.0087628	0.963216	0.0572673	0.755338	-0.0189911	0.907178	-0.0674956	0.958261	-0.0435144	0.802475	-0.0127128	0.959294	-0.00371488	0.992197	-0.0345165	0.999179	0.214409	0.00219741	-0.0520011	0.892972
BBS5	NM_152384	515.954	-0.126773	0.521339	-0.0787944	0.781144	0.0184434	0.943853	-0.0295352	1	-0.122922	0.565846	0.0133938	0.974462	0.114615	0.73207	-0.0217001	0.999179	-0.345243	0.00115905	0.00411525	0.997834
BBS7	NM_018190	1088.75	-0.150124	0.320846	0.00250933	0.994396	0.138518	0.299171	-0.0141161	1	-0.0723054	0.722693	0.0398446	0.875296	0.149459	0.400874	0.0373089	0.999179	-0.143603	0.131456	0.0780745	0.864783
BBS9	NM_198428	422.107	0.0115368	0.97713	0.134925	0.693181	0.126641	0.620077	0.00325271	1	-0.170939	0.484513	-0.125982	0.67062	0.106817	0.829989	0.0618601	0.999179	1.01819	9.34e-15	-0.182249	0.781743
BBX	NM_001142568	8905.36	0.204126	0.0672289	0.0561887	0.794275	0.0238196	0.894118	0.171757	0.248592	0.492198	8.13e-10	0.0913996	0.56997	-0.141181	0.351379	0.259617	0.0110726	0.373861	1.1e-06	0.288361	0.330386
BCAM	NM_005581	1.08766	-1.02457	NA	1.71086	NA	1.81246	NA	-0.922867	NA	-0.162724	NA	-0.740095	NA	2.08107	NA	2.65842	NA	1.46003	0.700361	0.861853	NA
BCAN	NM_021948	10.5537	-0.654113	NA	-0.443003	NA	-0.242311	NA	-0.45342	1	-1.46998	NA	0.079937	NA	1.00436	NA	-0.545544	0.973689	-0.407955	0.614281	-0.815419	NA
BCAP29	NM_001371357	1083.03	-0.162829	0.629356	0.0216003	0.969759	0.20267	0.470483	0.0182404	1	0.0823733	0.862401	0.0622292	0.905485	-0.00538673	0.996396	0.0147574	0.999179	-0.781738	2.88e-06	0.245401	0.76346
BCAP31	NM_001256447	10741.5	-0.0623481	0.573474	0.0250875	0.887636	0.0971584	0.257965	0.00972271	1	-0.00695384	0.970059	-0.00580187	0.979744	0.00387123	0.989931	0.00271925	0.999179	-0.0839458	0.183958	0.0557054	0.847924
BCAR1	NM_001170718	6937.62	-0.0588873	0.681639	0.0589225	0.744959	-0.0439336	0.748664	-0.161743	0.186866	-0.324467	2.38e-05	0.0805934	0.575564	0.222276	0.0184571	-0.182784	0.0933411	-0.295419	1.74e-05	-0.265299	0.292569
BCAR3	NM_003567	2276.86	0.114877	0.725472	0.529933	0.00515536	0.368846	0.0759499	-0.0462098	1	-0.0825428	0.844182	0.381133	0.0844317	0.437114	0.04648	-0.0265611	0.999179	0.216417	0.207631	-0.197051	0.792694
BCAR4	NR_131216	1.32727	-1.77513	NA	-0.302653	NA	0.158833	NA	-1.31363	NA	-1.17784	NA	-1.16988	NA	2.51995	NA	2.51199	NA	-0.576955	0.747501	0.597385	NA
BCAS1	NM_001323347	1522.24	0.0103552	0.980233	0.0395272	0.932092	0.0066231	0.986185	-0.0225488	1	0.0341104	0.938289	-0.119526	0.720491	-0.108237	0.84191	0.0453991	0.999179	0.381027	0.00878837	0.0240877	0.981172
BCAS2	NM_005872	4577.5	-0.122019	0.586008	-0.00966821	0.982752	0.135623	0.48049	0.0232723	1	-0.0544152	0.866466	-0.089709	0.750639	-0.0460278	0.938325	-0.010734	0.999179	-0.0159852	0.91684	0.0678527	0.921941
BCAS3	NM_001320470	993.881	0.104421	0.614581	0.0431875	0.897924	-0.079702	0.685863	-0.0184688	1	0.116731	0.556359	0.0867498	0.712961	0.0526679	0.915845	0.0826494	0.965116	0.707605	9.64e-13	0.0126108	0.988273
BCAS4	NM_198799	5393.96	-0.120266	0.388152	0.0961454	0.563457	0.0831914	0.54037	-0.13322	0.548068	-0.182408	0.103916	0.0800626	0.647051	0.149873	0.314187	-0.112598	0.686186	-0.663484	8.58e-19	-0.0618304	0.886386
BCAT1	NM_005504	16608.1	-0.382301	0.0573887	-0.0821871	0.843521	0.218452	0.325077	-0.0816625	1	-0.0397599	0.92812	0.097003	0.79037	0.00261775	0.998806	-0.134145	0.928359	0.19797	0.215571	0.342763	0.650725
BCAT2	NM_001190	8192.42	0.0477612	0.788606	-0.0280001	0.915863	-0.0633235	0.677169	0.0124378	1	0.0366213	0.87423	-0.00414823	0.98876	0.0211122	0.966534	0.0618817	0.981554	-0.231753	0.00526547	-0.0107979	0.987126
BCCIP	NM_078468	8657.53	-0.0547764	0.705282	-0.0271649	0.903109	0.0695051	0.566642	0.0418937	1	0.0882583	0.49439	0.0550892	0.742357	-0.0444011	0.88362	-0.011232	0.999179	-0.192935	0.00628131	0.143316	0.675181
BCDIN3D	NM_181708	1036.97	0.0121753	0.947035	0.0628048	0.725446	-0.0304924	0.84037	-0.0811219	0.888813	0.0107733	0.961909	-0.156815	0.146279	-0.133551	0.323478	0.0340379	0.999179	-0.0928069	0.245127	-0.00110202	0.999057
BCDIN3D-AS1	NR_027499	37.6897	0.154488	0.841886	0.00560608	0.996849	-0.415926	0.466007	-0.267043	1	-0.116938	0.910319	-0.293862	NA	-0.0570725	NA	0.119852	0.999179	0.0669807	0.88115	-0.271011	0.883174
BCHE	NR_137635	0.413233	-2.04507	NA	0.0974347	NA	1.89041	NA	-0.251823	NA	-2.59388	NA	-2.6315	NA	0	NA	0	NA	0.441306	NA	-0.548995	NA
BCKDHA	NM_000709	11197.1	0.00116481	0.995201	0.0333963	0.884765	0.00605227	0.975438	-0.0261792	1	-0.16302	0.129448	-0.118216	0.364289	0.0600586	0.829989	0.0152552	0.999179	0.154541	0.0491841	-0.163903	0.671268
BCKDHB	NM_000056	2359.89	-0.0724432	0.674694	0.00210182	0.995364	0.0692237	0.655412	-0.00532131	1	0.0752393	0.691708	0.160182	0.243566	0.0189597	0.971533	-0.0659833	0.974972	-0.252259	0.00319601	0.147998	0.713626
BCKDK	NM_005881	7659.56	0.055648	0.759516	-0.0397028	0.87769	-0.0804539	0.594113	0.0148968	1	-0.114458	0.459998	-0.0799482	0.677175	0.0319878	0.942587	-0.00252231	0.999179	0.0210752	0.847724	-0.169773	0.683854
BCL10	NM_003921	4205.83	-0.0318965	0.780261	-0.0511007	0.682302	-0.0241594	0.828088	-0.00495518	1	-0.0537051	0.614336	-0.0716621	0.456684	-0.00782979	0.983361	0.0101272	0.999179	0.256106	4.05e-07	-0.0215349	0.948719
BCL11A	NM_001363864	2698.36	0.130904	0.526013	0.378918	0.00413686	0.277661	0.050258	0.0296473	1	0.122403	0.545964	0.417837	0.000600064	0.357237	0.00705677	0.0618031	0.994484	1.82394	7.36e-75	-0.00815563	0.99346
BCL11B	NM_138576	70.6012	-0.303721	0.578757	-0.284005	0.667261	-0.278134	0.583511	-0.29785	0.934001	-0.820221	0.215907	-0.146891	0.902693	-1.25028	0.193031	-1.92361	0.00571749	-3.0506	5.71e-21	-0.516212	0.765905
BCL2	NM_000657	3142.26	-0.218713	0.189513	0.309287	0.0228881	0.460184	8.84e-05	-0.0678158	1	-0.208294	0.185268	0.159263	0.387488	0.353092	0.00837907	-0.0144653	0.999179	0.518918	3.3e-07	0.010638	0.991174
BCL2A1	NM_001114735	7709.46	0.212412	0.226817	-0.0420852	0.903675	0.0333261	0.891532	0.287823	0.0775138	0.124359	0.55603	-0.239348	0.138139	-0.21876	0.244401	0.144947	0.730513	0.381058	0.000372172	-0.0877917	0.878654
BCL2L1	NM_001322242	14766.2	0.174707	0.280371	-0.0173217	0.955549	-0.0741579	0.677332	0.117871	0.848286	0.00889863	0.977255	-0.00606881	0.986337	0.080803	0.814829	0.0957705	0.903577	0.844397	1.19e-20	-0.165498	0.718914
BCL2L10	NM_001306168	516.881	-0.0696202	0.810853	0.117858	0.714712	0.032105	0.917325	-0.155373	0.863967	-0.337124	0.0442558	-0.0601775	0.867718	-0.0825679	0.882428	-0.359515	0.0511882	0.567911	6e-06	-0.267179	0.675181
BCL2L11	NM_138621	2319.56	-0.133511	0.831057	0.31655	0.602379	0.628408	0.0969272	0.178347	1	-0.215107	0.74283	0.0187361	0.985836	0.303019	0.717233	0.0691761	0.999179	1.65318	5.39e-10	-0.0813983	0.966235
BCL2L12	NM_138639	5828.8	0.111864	0.561076	0.139754	0.474331	-0.0249531	0.915871	-0.0528433	1	-0.0107683	0.973063	0.0934582	0.680666	0.14744	0.534502	0.0432134	0.999179	-0.303504	0.00260415	-0.122278	0.799654
BCL2L13	NM_015367	7355.59	0.0111263	0.923845	0.0374505	0.75295	0.015158	0.880911	-0.0111662	1	-0.0245478	0.839002	-0.0422122	0.677635	0.0116694	0.966474	0.0293338	0.992714	0.323981	6.08e-14	-0.0353603	0.886355
BCL2L14	NM_138722	703.667	3.51789	2.7e-57	-0.309655	0.617904	-0.684631	0.00245894	3.14291	2.35e-41	2.36389	4.38e-41	-0.296447	0.37603	-0.445612	0.11064	2.21473	1.6e-35	3.44312	5.77e-56	-1.15354	0.00935055
BCL2L15	NM_001010922	113.629	-0.115733	0.826887	-0.233756	0.67431	0.0115865	0.98514	0.129609	1	0.249421	0.598316	0.0560775	0.94291	-0.316411	0.597204	-0.123068	0.999179	-0.143675	0.613097	0.365403	0.742511
BCL2L2	NM_004050	3457.83	0.0171223	0.926478	0.00678709	0.978819	-0.107364	0.333666	-0.0970291	0.777618	0.020159	0.924999	0.0080875	0.976924	-0.0410291	0.902224	-0.0289576	0.999179	0.129904	0.0906245	0.00331412	0.997211
BCL2L2-PABPN1	NM_001199864	22654.3	0.163464	0.329696	0.141742	0.444916	-0.0138353	0.956045	0.0078862	1	0.0606667	0.809393	0.0815324	0.722586	-0.0436733	0.927917	-0.0645389	0.989185	-0.109985	0.316999	-0.102439	0.827132
BCL3	NM_005178	8756.94	0.671563	5.82e-08	0.0310288	0.935976	-0.025549	0.929177	0.614985	1.59e-06	0.268012	0.111411	-0.173846	0.420934	-0.0597324	0.918849	0.382125	0.0154008	0.767678	1.61e-11	-0.40329	0.428394
BCL6	NM_001706	225.029	3.23891	4.26e-35	0.278617	0.706243	-0.61843	0.0452355	2.34186	5.99e-19	1.49511	7.67e-10	-0.809253	0.0108243	-0.498073	0.204818	1.80629	2.49e-13	2.25329	1.73e-17	-1.74361	0.000139083
BCL6B	NM_181844	56.5878	-0.448142	0.32799	-0.0695515	0.934972	0.0665594	0.916613	-0.312031	0.869779	0.0880114	0.927427	-0.139618	NA	-0.0477212	NA	0.179908	0.999179	-1.65997	4.52e-09	0.536545	0.702787
BCL7A	NM_020993	4878.64	-0.0237656	0.945698	0.532691	0.000628895	0.492344	0.00169995	-0.0641122	1	-0.382151	0.0266501	0.445299	0.0079904	0.589866	0.000150808	-0.237583	0.465585	0.664954	3.3e-07	-0.358113	0.613519
BCL7B	NM_001707	8174.61	0.0643648	0.607303	-0.158472	0.0795147	-0.178367	0.0288285	0.04447	1	-0.12046	0.225043	-0.216831	0.00672821	-0.0678679	0.732627	0.0285021	0.999179	0.0741828	0.304219	-0.184507	0.575807
BCL7C	NM_004765	2829.83	-0.0771522	0.584476	0.105166	0.45209	0.11578	0.296904	-0.0665378	0.976684	-0.188384	0.061446	-0.068599	0.68356	0.0499086	0.87528	-0.0698761	0.927021	-0.546925	6.24e-15	-0.110912	0.753598
BCL9	NM_004326	5196.55	-0.015714	0.937806	0.0909434	0.57921	0.00746876	0.969671	-0.0991886	0.806769	-0.018104	0.939307	0.154851	0.195889	0.0624146	0.826731	-0.11054	0.664184	-0.0155554	0.876057	-0.00207994	0.998225
BCL9L	NM_182557	5814.21	-0.0628495	0.759034	-0.0163821	0.957563	-0.0440852	0.828088	-0.0905526	0.966786	-0.221438	0.0968806	-0.1231	0.506474	0.0211817	0.971547	-0.0771557	0.968587	0.343595	0.000290182	-0.158305	0.729962
BCLAF1	NM_014739	27784.7	-0.0595866	0.692252	-0.126896	0.31279	-0.0117576	0.949717	0.055552	1	0.0803076	0.585052	-0.0110437	0.967608	-0.0906594	0.652832	0.000691934	0.999686	-0.201372	0.00673901	0.14016	0.695068
BCLAF3	NM_001367774	927.209	-0.11188	0.716417	0.113922	0.771984	0.244736	0.265088	0.0189331	1	0.0875975	0.819824	0.0758779	0.851686	-0.0158083	0.986217	-0.00408881	0.999179	-0.313582	0.042328	0.199738	0.77622
BCO1	NM_017429	12.2762	-1.18016	NA	-1.35317	NA	1.12346	NA	1.29647	0.809676	0.204109	NA	-0.021842	NA	-0.44895	NA	-0.222999	0.999179	2.35517	0.00147556	1.38435	0.719138
BCO2	NM_001256400	74.2647	0.101652	0.878285	-0.0682584	0.940641	0.083874	0.893752	0.253785	0.978406	0.430435	0.316291	0.0130812	0.988876	-0.334477	0.625174	0.0828769	0.999179	0.538325	0.0640301	0.329079	0.799654
BCOR	NM_001123385	10182.9	0.140248	0.281246	0.0555128	0.792748	0.0546287	0.708909	0.139364	0.474777	-0.0262316	0.910943	0.0259295	0.914315	0.106707	0.578765	0.0545457	0.988021	0.0654089	0.4684	-0.166165	0.673243
BCORL1	NM_001184772	1227.02	-0.0332719	0.898831	-0.262481	0.0919998	-0.310246	0.024723	-0.0810374	1	-0.0947584	0.704387	-0.286637	0.0632134	-0.279491	0.0975881	-0.0876116	0.973689	-0.421072	9.53e-05	-0.0612203	0.927462
BCORP1	NR_033732	202.289	-0.0415829	0.954208	0.25299	0.701231	0.165103	0.759109	-0.12947	1	0.163642	0.701368	0.435289	0.114738	0.159416	0.814417	-0.112231	0.994484	3.10122	8.16e-44	0.205525	0.867749
BCR	NM_004327	9429.28	-0.0739447	0.642986	0.0381663	0.873608	-0.0725775	0.613088	-0.184689	0.18478	-0.212103	0.0527883	0.0852994	0.629324	0.113106	0.580802	-0.184297	0.207803	-2.0206	4.37e-161	-0.137828	0.719138
BCRP2	NR_037566	3.13995	-0.98836	NA	-0.678865	NA	0.777994	NA	0.468499	NA	-2.35123	NA	-0.489675	NA	1.03093	NA	-0.830597	NA	-2.05239	0.0765568	-1.36268	NA
BCRP3	NR_024494	14.8856	-0.146276	NA	-0.428412	NA	-0.188506	NA	0.0936294	1	-0.118646	NA	-0.146377	NA	-0.467875	NA	-0.440144	0.987133	-0.0645241	0.934892	0.0276941	0.997211
BCS1L	NM_001079866	2687.77	0.0691629	0.694022	0.0586523	0.803829	-0.0153084	0.942982	-0.00479777	1	0.0586895	0.782065	0.103374	0.552015	0.0114714	0.983772	-0.0332134	0.999179	-0.509423	6.39e-10	-0.0101139	0.988996
BCYRN1	NR_001568	354.031	1.24012	0.207832	0.950911	0.401383	-1.01229	0.271157	-0.723081	0.86869	-0.513643	0.717586	-0.615996	0.649605	0.627314	0.748088	0.729666	0.815989	0.0354217	0.967873	-1.75327	0.579255
BDH1	NM_004051	5797.89	-0.0538193	0.819132	-0.0373237	0.913227	-0.0792006	0.685863	-0.0956962	0.976684	-0.0974744	0.672931	0.0322426	0.923721	0.00255821	0.99781	-0.127159	0.804808	-0.864862	3.52e-18	-0.0433038	0.948851
BDH2	NM_020139	1952.88	0.0269219	0.870922	0.0579852	0.752657	0.0912805	0.418683	0.0602171	0.993159	0.170125	0.0731031	0.0701313	0.645937	-0.0111669	0.981992	0.0888273	0.769846	0.131593	0.0791588	0.143532	0.679069
BDKRB1	NM_000710	1.9822	-1.15091	NA	-0.928894	NA	0.731701	NA	0.509686	NA	-0.244882	NA	-0.856203	NA	1.17	NA	1.78132	NA	0.980002	0.610346	0.906135	NA
BDKRB2	NM_000623	0.731608	0	NA	0.936516	NA	0	NA	-0.989668	NA	-2.61571	NA	-0.178391	NA	1.98471	NA	-0.452548	NA	3.40682	NA	-2.55266	NA
BDNF	NM_001709	16.0536	-0.640035	0.612439	0.636484	NA	0.870706	NA	-0.405811	1	-0.386618	0.844182	0.578174	NA	-1.27944	NA	-2.24423	0.0670117	-1.32074	0.0635703	0.253488	0.957176
BDNF-AS	NR_033314	69.0776	-0.160716	0.830444	0.0741486	0.944562	0.199371	0.759903	-0.0354942	1	0.111007	0.897343	-0.0204585	0.985117	0.00507207	0.998806	0.136538	0.999179	1.20287	9.59e-05	0.271995	0.866158
BDP1	NM_018429	7847.08	-0.0681876	0.747936	-0.109706	0.621327	-0.0104636	0.966877	0.0310551	1	0.121682	0.523466	0.0673354	0.789565	-0.0847504	0.814649	-0.0304037	0.999179	-0.19696	0.0621308	0.190149	0.696344
BEAN1	NM_001178020	0.441677	3.49168	NA	0	NA	-3.54453	NA	0	NA	-2.59395	NA	-2.63158	NA	1.11964	NA	1.15726	NA	2.42315	NA	-6.08429	NA
BEAN1-AS1	NR_109960	0.0895019	0	NA	0	NA	0.971353	NA	0.933853	NA	0.823302	NA	0	NA	-0.803671	NA	0	NA	-0.0322521	NA	0.88626	NA
BECN1	NM_003766	12060	0.0495032	0.459853	0.0240406	0.817975	0.0277796	0.687359	0.0532422	0.720931	0.0865952	0.0902842	0.0197327	0.842018	-0.00979015	0.966357	0.0570724	0.604223	0.0830351	0.0318326	0.0374036	0.836989
BECN2	NM_001290693	0	NA	NA	NA	NA	NA	NA	NA	NA	NA	NA	NA	NA	NA	NA	NA	NA	NA	NA	NA	NA
BEGAIN	NM_020836	24.4965	-0.943132	0.252323	-0.218093	NA	0.807905	0.285955	0.0828669	1	-0.654457	0.362943	-0.435101	NA	0.180474	NA	-0.0388814	0.999179	1.04147	0.0207796	0.288813	0.915285
BEND2	NM_001184767	0.191666	0.883405	NA	0	NA	0.0251991	NA	0.933802	NA	-1.01554	NA	-2.01495	NA	-0.803722	NA	0	NA	1.80646	NA	-1.8987	NA
BEND3	NM_001367314	2463.3	-0.101517	0.515943	-0.112363	0.500231	-0.0923581	0.513156	-0.0815118	0.955874	-0.341793	0.000194719	-0.117389	0.431694	-0.0542586	0.876116	-0.278663	0.00844336	0.530941	1.56e-11	-0.239992	0.575807
BEND3P3	NR_027512	1.60612	-1.95884	NA	1.25525	NA	1.91732	NA	-1.29672	NA	0.505402	NA	0.314672	NA	0.522261	NA	0.71299	NA	1.24221	0.541695	2.4647	NA
BEND4	NM_207406	2446.9	-0.109064	0.634984	0.0748634	0.816239	-0.149562	0.428098	-0.33349	0.042584	-0.0681766	0.771673	0.0706962	0.768984	0.0339657	0.945676	-0.104907	0.86608	3.50796	1.52e-278	0.0411883	0.953484
BEND5	NM_001302082	384.584	-0.00744435	0.992769	0.421978	0.454379	0.574092	0.166727	0.144669	1	-0.208693	0.722259	0.248545	0.657505	0.404558	0.462864	-0.0526795	0.999179	3.43768	5.35e-40	-0.201008	0.897199
BEND6	NM_152731	186.28	-0.00340594	0.994177	0.156584	0.746897	-0.0763687	0.851306	-0.236359	0.828835	0.0833688	0.865005	0.0599962	0.913821	-0.0245461	0.983772	-0.00117352	0.999686	0.584177	0.00148263	0.0870928	0.938589
BEND7	NM_001370075	1.58241	-0.623655	NA	0.0635219	NA	1.66149	NA	0.974319	NA	0.674776	NA	-0.574655	NA	-2.54925	NA	-1.29983	NA	-0.26525	0.904708	1.29884	NA
BEST1	NM_001363591	1088.3	-0.0617123	0.86867	0.0116583	0.984445	-0.0399979	0.915871	-0.113369	1	-0.128019	0.731999	-0.100164	0.806192	0.176268	0.714133	0.148413	0.928359	0.0302014	0.884769	-0.0659346	0.948851
BEST2	NM_017682	27.3927	-0.178598	0.846754	0.160789	NA	0.677804	0.238368	0.338417	0.982025	-0.0457996	0.966668	-0.00591785	NA	-0.333093	NA	-0.372975	0.888079	0.804955	0.0412715	0.133081	0.959023
BEST3	NM_152439	0.882075	-0.897247	NA	-0.650107	NA	0.816384	NA	0.569248	NA	-0.143119	NA	-1.65173	NA	0.874155	NA	2.38273	NA	-0.0403519	NA	0.753772	NA
BEST4	NM_153274	85.8778	-0.308819	0.5073	-0.196616	0.767738	0.0887149	0.873496	-0.0234882	1	-0.285417	0.615462	-0.108537	0.892267	0.326637	0.680312	0.149756	0.999179	-1.02541	6.55e-05	0.0236038	0.99264
BET1	NM_005868	1406.23	-0.143127	0.532376	-0.0114661	0.978647	0.13985	0.487815	0.00818929	1	0.144004	0.532789	0.0277162	0.946907	-0.0221295	0.978772	0.0941581	0.973689	0.137458	0.31462	0.287365	0.650725
BET1L	NM_001098787	11212.9	0.0741654	0.354041	0.0576258	0.547105	-0.00201002	0.987434	0.0145296	1	-0.0518834	0.563468	0.1757	0.00109853	0.256331	1.8e-07	0.0287477	0.99388	0.509032	1.09e-32	-0.125725	0.595273
BEX1	NM_018476	2.80642	-0.803873	NA	-1.52186	NA	0.143306	NA	0.861274	NA	0.0721406	NA	0.269201	NA	-0.272371	NA	-0.46943	NA	2.17628	0.109133	0.875699	NA
BEX2	NM_032621	218.855	0.0782061	0.878084	0.145408	0.808295	-0.0660058	0.891532	-0.133208	1	0.110044	0.815563	-0.0146826	0.981655	-0.0714512	0.938458	0.0532754	0.999179	1.90035	8.54e-24	0.0321794	0.982867
BEX3	NM_206915	457.665	-0.210537	0.549904	-0.0320733	0.956627	0.0283338	0.952222	-0.15013	1	-0.0939106	0.852527	-0.110585	0.814686	-0.138837	0.844952	-0.122162	0.989185	0.0300993	0.9005	0.116862	0.913835
BEX4	NM_001080425	1372.18	-0.289205	0.0731256	-0.0355296	0.923625	0.196227	0.244096	-0.0574485	1	-0.0310647	0.932248	-0.0195313	0.964606	-0.0521483	0.929113	-0.0636816	0.999179	-1.60209	3.93e-49	0.258396	0.667487
BEX5	NM_001012978	48.2903	0.364168	0.549904	0.00169514	0.999173	-0.39099	0.453905	-0.0285175	1	0.155053	0.913096	0.106355	NA	0.417263	NA	0.465961	0.885293	-2.84293	5.09e-13	-0.20873	0.933221
BFAR	NM_016561	8314.35	0.0302096	0.759414	0.0633861	0.48522	-0.00935029	0.933716	-0.0425268	0.975159	-0.0837663	0.249109	0.0611188	0.486347	0.0555793	0.670575	-0.0893058	0.366839	0.0481657	0.358447	-0.11366	0.637347
BFSP1	NM_001195	15.8586	0.220424	NA	0.328777	NA	-0.226423	NA	-0.334775	1	-0.028194	NA	0.367752	NA	0.347637	NA	-0.0483085	0.999179	-2.43497	4.36e-05	-0.248379	0.948677
BFSP2	NM_003571	868.329	-0.146977	0.443857	0.0981838	0.702216	0.140902	0.408156	-0.104259	0.950876	-0.0462378	0.870819	0.116084	0.575965	0.00842741	0.988646	-0.153894	0.625696	0.594907	2.84e-09	0.101032	0.847068
BFSP2-AS1	NR_135277	136.625	-0.282364	0.429296	0.352765	0.267538	0.361891	0.210171	-0.273238	0.720931	0.0382477	0.949111	0.419687	0.121465	0.196606	0.730227	-0.184834	0.890405	0.257218	0.228481	0.320884	0.729095
BGLAP	NM_199173	61.2335	-0.129564	0.846754	-0.336171	0.606903	0.0181444	0.981331	0.224751	1	0.265255	0.680304	-0.21191	0.776778	-0.0344288	0.984605	0.442736	0.633451	-0.199452	0.571234	0.395092	0.776915
BGLT3	NR_121648	0	NA	NA	NA	NA	NA	NA	NA	NA	NA	NA	NA	NA	NA	NA	NA	NA	NA	NA	NA	NA
BGN	NM_001711	0	NA	NA	NA	NA	NA	NA	NA	NA	NA	NA	NA	NA	NA	NA	NA	NA	NA	NA	NA	NA
BHLHA15	NM_177455	1218.62	0.28129	0.250466	-0.0305684	0.949514	-0.0380729	0.911744	0.273786	0.443434	0.0902716	0.786235	0.17671	0.495458	0.189135	0.565686	0.102696	0.978368	2.43601	9.13e-76	-0.190653	0.777012
BHLHA9	NM_001164405	0	NA	NA	NA	NA	NA	NA	NA	NA	NA	NA	NA	NA	NA	NA	NA	NA	NA	NA	NA	NA
BHLHB9	NM_001142530	338.516	-0.299501	0.297804	-0.0141785	0.98255	0.109779	0.741613	-0.175543	0.931927	-0.176869	0.596891	-0.0563548	0.912498	-0.00442075	0.997313	-0.124935	0.980473	0.271604	0.131514	0.122803	0.895426
BHLHE22	NM_152414	3522.04	-0.164223	0.779702	0.848775	0.0121188	0.833481	0.0119193	-0.179516	1	-0.0246277	0.978153	0.128754	0.869249	0.0684205	0.966534	-0.0849615	0.999179	-2.36518	2.01e-20	0.139856	0.933448
BHLHE23	NM_080606	5.28677	-1.59089	NA	-0.942342	NA	-0.262734	NA	-0.911276	NA	-0.629639	NA	-1.59487	NA	-0.305047	NA	0.660175	NA	-0.671329	0.669337	0.960238	NA
BHLHE40	NM_003670	17377.7	-0.138913	0.387201	0.132559	0.444916	0.311411	0.00398594	0.0399395	1	0.125111	0.446908	0.294232	0.0108415	0.325157	0.00436798	0.156036	0.502261	0.0395887	0.725879	0.264355	0.575807
BHLHE40-AS1	NR_125916	106.938	-0.204104	0.671579	0.246261	0.642455	0.539414	0.0886082	0.0890491	1	-0.46642	0.251457	-0.0695042	0.930575	0.218335	0.818961	-0.178581	0.989185	-0.720427	0.00344911	-0.262002	0.826678
BHLHE41	NM_030762	395.697	0.0174767	0.981032	0.543733	0.15317	0.765639	0.0133781	0.239383	0.957481	0.139702	0.826466	0.724271	0.0223014	0.567844	0.136325	-0.0167243	0.999179	1.26164	1.78e-07	0.122555	0.936487
BHMG1	NM_001310124	13.6993	-0.522401	NA	0.142936	NA	0.362956	NA	-0.30238	1	-0.509345	NA	-1.06361	NA	-0.341663	NA	0.212605	0.999179	0.0119276	0.985695	0.0132823	0.998225
BHMT	NM_001713	1.00697	0	NA	0	NA	0.971397	NA	0.933891	NA	-1.15788	NA	-2.35289	NA	0.914524	NA	2.10951	NA	4.0023	NA	-1.09542	NA
BHMT2	NM_001178005	0.213307	-0.0782388	NA	-0.986984	NA	0.0251859	NA	0.933786	NA	0.823235	NA	1.64034	NA	-0.803739	NA	-1.62071	NA	-0.993812	NA	0.901308	NA
BICC1	NM_001080512	5.77087	-0.103476	NA	0.696505	NA	0.61058	NA	-0.1894	NA	-0.479021	NA	0.535077	NA	-0.725992	NA	-1.74009	NA	-0.308189	0.783288	-0.375475	NA
BICD1	NM_001354189	1667.67	0.0310363	0.903154	-0.00385092	0.991929	-0.0460973	0.837561	-0.0112101	1	-0.0277859	0.931944	0.116254	0.600195	0.0547638	0.915908	-0.0892759	0.960561	-0.202193	0.0719996	-0.0584415	0.928832
BICD2	NM_015250	6420.85	-0.0260818	0.849968	-0.0165135	0.932214	0.0176841	0.897051	0.00811583	1	-0.0771105	0.493456	0.00486382	0.981863	0.0629879	0.743117	-0.0189864	0.999179	-0.304767	2.01e-07	-0.0507625	0.873603
BICDL1	NM_207311	957.089	-0.365015	0.000104778	-0.0713417	0.736832	0.0784635	0.610955	-0.21521	0.105832	-0.237597	0.0142274	0.143924	0.24609	0.133514	0.396149	-0.248007	0.0148565	0.721026	1.75e-21	0.127697	0.740235
BICDL2	NM_001103175	4.46453	-0.104274	NA	-1.20577	NA	-0.489594	NA	0.611895	NA	-0.250245	NA	-2.24345	NA	-0.25591	NA	1.73728	NA	1.10015	0.310752	-0.145773	NA
BICRA	NM_015711	5541.65	0.332739	0.000105073	-0.0223937	0.929512	-0.221115	0.0227798	0.134018	0.520226	0.191222	0.069037	0.0155152	0.956812	-0.0271094	0.945676	0.148598	0.377648	-0.0758022	0.393177	-0.141188	0.702396
BICRAL	NM_015349	4566.01	-0.0617002	0.399363	0.0542048	0.515494	0.0880577	0.123999	-0.0278472	1	-0.0259992	0.809139	0.0509496	0.539539	0.0116354	0.964345	-0.0653134	0.59446	-0.218416	5.52e-08	0.0359959	0.866526
BID	NM_001196	13955.6	0.0136151	0.91724	0.0748855	0.455725	0.0764072	0.344657	0.0151368	1	-0.0747374	0.421532	0.0919533	0.293216	0.177781	0.00810901	0.0110899	0.999179	-0.152639	0.00370609	-0.0880211	0.719138
BIK	NM_001197	527.273	-0.449489	0.0305891	0.419227	0.0386177	0.805888	1.13e-06	-0.0628274	1	-0.286639	0.211667	0.268973	0.267478	0.362619	0.115779	-0.192992	0.75318	0.56654	0.000154299	0.163173	0.825769
BIN1	NM_001320634	3046.08	-0.201277	0.290977	-0.131667	0.587873	0.0450783	0.852553	-0.0245316	1	-0.253797	0.078989	-0.126237	0.551751	0.0476805	0.926193	-0.0798797	0.98016	2.59174	4.16e-146	-0.0522384	0.938589
BIN2	NM_016293	7944.94	-0.0367676	0.653152	0.070393	0.314788	0.0505269	0.446315	-0.0566337	0.752857	0.0424652	0.626765	0.0355583	0.716554	-0.0184745	0.928783	-0.0115676	0.999179	-0.770024	3.26e-90	0.0795571	0.695068
BIN3	NR_156436	3965.81	0.0521621	0.782669	-0.104331	0.576542	-0.180441	0.143044	-0.0239479	1	-0.17565	0.183134	-0.186232	0.163232	-0.00250422	0.997313	0.00807766	0.999179	-0.0591732	0.571029	-0.227484	0.623755
BIN3-IT1	NR_027715	8.43364	-0.599616	NA	-0.351905	NA	0.129779	NA	-0.117931	1	-0.270405	NA	0.0960216	NA	-0.15079	NA	-0.517216	0.983954	-0.114144	0.900439	0.329375	NA
BIRC2	NM_001256166	4438.1	-0.124246	0.658179	0.0311229	0.944562	0.296302	0.126963	0.140933	0.941122	0.186896	0.458981	0.0659409	0.868414	-0.000471296	0.999675	0.120484	0.951073	0.699788	2.13e-07	0.31135	0.664709
BIRC3	NM_182962	29070.9	-0.102267	0.758852	-0.281004	0.284598	-0.0428609	0.905175	0.135876	0.991253	0.19265	0.514411	-0.370388	0.101725	-0.49139	0.0178525	0.0716481	0.999179	0.832368	3.12e-08	0.295137	0.696344
BIRC5	NM_001168	15976.2	0.0531528	0.779702	0.129356	0.433511	0.0544804	0.749042	-0.0217232	1	0.09325	0.599406	0.224543	0.0671059	0.129718	0.523672	-0.00157512	0.999686	-0.495288	3.46e-09	0.0404467	0.941365
BIRC6	NM_016252	23015.5	-0.0513375	0.775514	-0.00330682	0.991723	-0.0304655	0.866211	-0.0784962	0.966786	0.157078	0.220595	0.096178	0.570839	-0.130481	0.476125	-0.0695808	0.961086	-0.0579872	0.55639	0.208738	0.62716
BIRC6-AS2	NR_125793	0.126108	0	NA	0	NA	1.9533	NA	1.9158	NA	0	NA	0.78566	NA	0	NA	-0.766071	NA	-0.032199	NA	-0.0756087	NA
BIRC7	NM_139317	21.224	-0.99675	0.597387	-0.83692	NA	0.239499	NA	0.0796691	1	-2.64706	0.0642694	-1.81068	NA	-0.355755	NA	-1.19213	0.879448	-0.949326	0.395238	-1.65023	0.735073
BIRC8	NR_159880	0.330311	-1.02452	NA	-0.0252247	NA	0	NA	-0.989643	NA	-0.216341	NA	-2.61063	NA	-2.1985	NA	0	NA	1.44068	NA	0.808519	NA
BISPR	NR_130766	1924.03	0.611984	1.54e-10	-7.7e-05	0.999708	-0.187845	0.158309	0.424215	6.41e-05	0.377931	0.000352891	-0.0913217	0.663571	-0.16418	0.374179	0.305073	0.0137879	0.307201	0.0012257	-0.233734	0.634431
BIVM	NM_017693	2992.78	-0.16532	0.291072	0.0763549	0.749348	0.11363	0.452829	-0.128044	0.756744	0.0665616	0.767047	0.182725	0.21483	-0.0395826	0.931339	-0.155746	0.527308	-0.463421	2.58e-07	0.23218	0.629187
BIVM-ERCC5	NM_001204425	10699.4	-0.0654827	0.444176	0.0819858	0.317712	0.0749153	0.300444	-0.0725532	0.656414	0.0218056	0.869377	0.136222	0.0309488	0.0435945	0.784924	-0.0708216	0.63498	0.0745831	0.149262	0.0875943	0.701279
BLACAT1	NR_103783	6.24967	-1.75386	NA	-0.43564	NA	-0.572106	NA	-1.89032	NA	0.842787	NA	-0.0662224	NA	-1.09418	NA	-0.185172	NA	0.162288	0.879702	2.59675	NA
BLACE	NR_103545	0	NA	NA	NA	NA	NA	NA	NA	NA	NA	NA	NA	NA	NA	NA	NA	NA	NA	NA	NA	NA
BLCAP	NM_006698	7588.68	-0.166903	0.00647629	0.102042	0.18425	0.143119	0.0223013	-0.125826	0.107982	-0.210451	0.0001306	0.026023	0.84578	0.113153	0.157073	-0.123321	0.119603	0.135805	0.00724561	-0.0432798	0.866158
BLID	NM_001001786	0.0429421	0	NA	0	NA	0	NA	0	NA	-1.10008	NA	-1.13771	NA	0	NA	0	NA	0.929284	NA	-1.03688	NA
BLK	NM_001715	16912.9	-0.130387	0.317228	0.182107	0.0928684	0.0909674	0.467472	-0.221526	0.0373449	-0.409595	3.51e-07	-0.0591626	0.750639	0.0899908	0.684366	-0.260441	0.00803262	-1.08473	1.23e-52	-0.278897	0.330801
BLM	NM_000057	8697.31	-0.114229	0.43715	0.00913651	0.972902	0.148653	0.213981	0.0252876	1	-0.029094	0.906411	0.0762186	0.68174	0.00313074	0.994705	-0.102182	0.786664	-0.581544	9.34e-14	0.0853921	0.829364
BLMH	NM_000386	10494.9	-0.0357906	0.719659	-0.0577997	0.564321	-0.0485268	0.557441	-0.0265176	1	-0.0652123	0.449074	-0.00352382	0.984729	-0.0185036	0.938787	-0.080192	0.519805	-0.147203	0.00203096	-0.0291148	0.918734
BLNK	NM_013314	17930.6	0.0665611	0.650306	0.233617	0.0106375	0.201497	0.0305959	0.0344412	1	0.0246654	0.91097	0.226588	0.0164001	0.211837	0.0373053	0.0099136	0.999179	0.344216	1.32e-06	-0.0415394	0.925947
BLOC1S1	NM_001487	4361.33	0.093107	0.565562	0.100789	0.572665	0.0681465	0.658567	0.0604646	1	0.0538521	0.800982	0.0608059	0.772711	0.0232641	0.964599	0.0163103	0.999179	-0.0851174	0.377202	-0.0388935	0.941365
BLOC1S1-RDH5	NR_037658	2788.88	0.100055	0.484715	0.065973	0.743486	0.0234204	0.894302	0.0575028	1	0.0430656	0.83653	0.0643864	0.728191	0.014523	0.978772	-0.00679775	0.999179	-0.0735206	0.415771	-0.0566408	0.896947
BLOC1S2	NM_173809	4492.4	-0.164266	0.327775	-0.0656501	0.809089	0.0918142	0.596411	-0.00680223	1	-0.0887157	0.676235	-0.0883339	0.687316	0.0182923	0.97797	0.0179105	0.999179	0.417091	1.18e-05	0.0758135	0.886386
BLOC1S3	NM_212550	2728.87	0.0279254	0.833077	-0.0154253	0.935755	0.00498335	0.973528	0.0483341	1	-0.0975157	0.317896	0.03046	0.849455	0.178745	0.0251675	0.050769	0.951073	0.045903	0.50886	-0.125136	0.673243
BLOC1S4	NM_018366	2019.09	-0.0583006	0.643931	0.0701138	0.614066	0.0486803	0.677598	-0.0797342	0.821947	-0.114632	0.249537	-0.0380745	0.814015	0.0532888	0.815197	-0.023269	0.999179	-0.0099948	0.904708	-0.0560449	0.864783
BLOC1S5	NM_201280	2139.86	-0.172564	0.0537407	-0.0228595	0.913227	0.0432341	0.728912	-0.106471	0.572236	-0.125896	0.194316	-0.0327114	0.852062	-0.091317	0.563295	-0.184502	0.0438829	0.00977701	0.908111	0.0469387	0.895668
BLOC1S5-TXNDC5	NR_037616	82715.2	0.0355171	0.894632	0.020866	0.953926	0.0400836	0.871531	0.0547348	1	-0.0193873	0.958021	0.0531914	0.869249	0.0749417	0.875359	0.00236303	0.999373	1.0083	2.7e-21	-0.0545685	0.938122
BLOC1S6	NM_012388	8090.41	-0.0874696	0.580982	-0.0548685	0.811863	0.0858715	0.545559	0.0532704	1	0.0364197	0.875427	-0.048663	0.818675	-0.046153	0.903431	0.0389297	0.999179	0.0266273	0.799419	0.124154	0.752726
BLVRA	NM_000712	6593.32	0.0217628	0.905425	0.126423	0.342489	0.144037	0.18733	0.0393764	1	0.105827	0.419936	0.098446	0.485503	0.0689281	0.781023	0.0763094	0.889148	1.2429	1.38e-71	0.0844216	0.816967
BLVRB	NM_000713	2375.77	-0.202779	0.415289	-0.177944	0.536112	-0.0376661	0.907708	-0.062501	1	-0.356169	0.0504294	-0.302989	0.138849	0.0900215	0.876116	0.036841	0.999179	1.4371	1.59e-28	-0.153135	0.819379
BLZF1	NM_001320973	1624.72	-0.100216	0.638292	-0.107163	0.667896	-0.0255128	0.919601	-0.0185657	1	0.16535	0.359902	0.0204767	0.958146	-0.100554	0.778116	0.0443195	0.999179	0.139643	0.239306	0.265789	0.630628
BM450697	NR_163945	12.4833	0.439605	NA	0.120465	NA	0.439809	NA	0.758948	0.901306	0.196841	NA	0.31543	NA	0.797902	NA	0.679313	0.881745	0.278881	0.753583	-0.242509	0.959085
BMERB1	NM_033201	183.163	-0.226031	0.638541	0.096401	0.897465	0.360317	0.325077	0.0378855	1	-0.356444	0.242063	-0.106296	0.83534	0.178488	0.785519	-0.0716607	0.999179	2.24101	2.9e-28	-0.130156	0.920598
BMF	NM_001003940	8164.33	-0.223084	0.381713	0.074495	0.860131	0.120272	0.648688	-0.177307	0.847782	-0.392488	0.0367459	0.0437141	0.923721	0.300581	0.223043	-0.135621	0.926111	1.09605	1.23e-15	-0.169084	0.807385
BMI1	NM_005180	4218.92	-0.253358	0.354041	-0.303133	0.233761	-0.0499733	0.887728	-0.000197996	1	-0.0101375	0.985185	-0.172991	0.598443	-0.161128	0.746966	0.00172638	0.999686	0.288505	0.0851216	0.243396	0.745673
BMP1	NR_033404	129.222	0.0529948	0.922288	0.0482202	0.944426	-0.163055	0.682434	-0.158281	1	-0.0201573	0.973909	0.00585001	0.992958	-0.228858	0.690453	-0.254866	0.759773	0.79507	8.44e-05	-0.0728605	0.958289
BMP10	NM_014482	2.65453	0.262556	NA	0.771991	NA	1.25989	NA	0.750458	NA	-1.51243	NA	0.814447	NA	2.54068	NA	0.213826	NA	1.38059	0.425667	-1.77503	NA
BMP15	NM_005448	0	NA	NA	NA	NA	NA	NA	NA	NA	NA	NA	NA	NA	NA	NA	NA	NA	NA	NA	NA	NA
BMP2	NM_001200	14.1362	-0.304008	NA	-0.125128	NA	0.963043	NA	0.784163	0.771745	-0.00172576	NA	0.44127	NA	-0.518895	NA	-0.961891	0.445203	0.896589	0.144498	0.302464	0.932937
BMP2K	NM_198892	4287.92	0.0650321	0.764303	0.30555	0.0169284	0.166615	0.267514	-0.0739034	1	0.0233425	0.938641	0.255613	0.0608012	0.142149	0.541951	-0.0901217	0.930407	1.48223	7.25e-58	-0.0412867	0.948677
BMP3	NM_001201	61.7838	-0.515494	0.388152	0.35	0.641915	0.718535	0.124608	-0.146958	1	-0.260429	0.85037	0.0738654	0.967608	0.531661	0.72368	0.197367	0.999179	-3.28006	2.72e-16	0.25531	0.920321
BMP4	NM_001347914	111.146	-0.128935	0.74892	-0.536956	0.0358786	-0.802883	0.000310429	-0.394862	0.357364	-0.152779	0.883436	-1.47024	0.00998099	-0.532639	0.609991	0.784821	0.55741	-4.00209	2.42e-50	-0.0234838	0.993296
BMP5	NM_021073	0.360684	0.885446	NA	0.936503	NA	0.914806	NA	0.863749	NA	0.0159424	NA	-1.98982	NA	-0.84826	NA	1.15739	NA	1.78094	NA	-0.869175	NA
BMP6	NM_001718	452.147	0.0197496	0.971122	0.355566	0.290424	0.432193	0.113246	0.0963759	1	-0.388785	0.19207	0.193027	0.654695	0.520623	0.0709972	-0.0611898	0.999179	0.491615	0.0159178	-0.408221	0.677259
BMP7	NM_001719	0.953541	-1.50883	NA	0.76847	NA	0.0171707	NA	-2.2601	NA	2.84462	NA	1.67216	NA	0.799972	NA	1.97242	NA	-2.43256	NA	4.35307	NA
BMP7-AS1	NR_110631	0	NA	NA	NA	NA	NA	NA	NA	NA	NA	NA	NA	NA	NA	NA	NA	NA	NA	NA	NA	NA
BMP8A	NM_181809	90.7624	-0.750646	0.0603169	-0.086275	0.92399	0.399028	0.380922	-0.265342	0.966786	-0.212253	0.740429	-0.0321602	0.975305	-0.0339488	0.984307	-0.214042	0.973689	0.23317	0.463637	0.538587	0.695068
BMP8B	NM_001720	211.948	-0.203329	0.572812	0.518584	0.0328338	0.728256	0.000559971	0.00634354	1	-0.922401	0.000411447	0.0875203	0.88765	0.636655	0.0607412	-0.373267	0.503316	-1.6293	1.45e-17	-0.718826	0.42079
BMPER	NM_001365308	2.12676	-1.43524	NA	-0.502379	NA	1.86405	NA	0.931213	NA	0.29259	NA	0.265024	NA	0.401684	NA	0.429251	NA	1.49304	0.383145	1.72827	NA
BMPR1A	NM_004329	1861.12	-0.0671714	0.533892	0.20115	0.0029098	0.22402	0.000511512	-0.0443008	1	-0.0155314	0.92482	0.0039929	0.985027	-0.025611	0.923981	-0.0451353	0.965013	0.308616	1.16e-08	0.0519186	0.854023
BMPR1B	NM_001203	0.9017	-0.0722581	NA	1.40817	NA	0.815028	NA	-0.66537	NA	1.09663	NA	0.546757	NA	-2.55214	NA	-2.00228	NA	1.44296	NA	1.16889	NA
BMPR1B-DT	NR_121610	0	NA	NA	NA	NA	NA	NA	NA	NA	NA	NA	NA	NA	NA	NA	NA	NA	NA	NA	NA	NA
BMPR2	NM_001204	6904.47	-0.0394631	0.792759	0.00546121	0.983553	-0.00811082	0.963317	-0.0530352	1	0.158954	0.0947003	0.116218	0.315662	-0.0587485	0.808992	-0.0160127	0.999179	0.700409	3.22e-27	0.198696	0.575807
BMS1	NM_014753	17034.5	0.0702532	0.453234	-0.0176978	0.915863	-0.0730405	0.368599	0.0149105	1	0.0460495	0.690731	0.0862338	0.331143	0.00679739	0.983772	-0.0333869	0.99388	-0.0027059	0.971251	-0.023874	0.941404
BMS1P1	NR_003611	181.815	-0.132926	0.716417	0.0278091	0.960829	-0.0213172	0.961782	-0.182052	0.929759	0.33803	0.17989	0.253092	0.400466	-0.0789226	0.922941	0.00601555	0.999179	0.0570072	0.795132	0.47126	0.5977
BMS1P14	NR_146106	3.77135	-0.943719	NA	-1.07742	NA	-0.617077	NA	-0.483379	NA	0.400605	NA	-0.566546	NA	-0.789517	NA	0.17763	NA	-0.397342	0.739976	1.3446	NA
BMS1P17	NR_073460	0.0381486	0	NA	0	NA	0	NA	0	NA	0.823319	NA	0	NA	-0.803654	NA	0	NA	-0.0323041	NA	0.886364	NA
BMS1P18	NR_073459	0.0381486	0	NA	0	NA	0	NA	0	NA	0.823319	NA	0	NA	-0.803654	NA	0	NA	-0.0323041	NA	0.886364	NA
BMS1P2	NR_024495	115.01	0.0482993	0.946536	0.054751	0.951766	0.170256	0.753358	0.163804	1	0.506043	0.239282	0.296026	0.612091	-0.192892	0.860226	0.0171249	0.999179	-0.0342831	0.925868	0.458263	0.729192
BMS1P20	NR_027293	15528	0.159278	0.755844	0.0288129	0.971438	-0.3398	0.366605	-0.209335	0.991253	0.0604858	0.935415	0.0982165	0.888871	0.0602168	0.966651	0.0224861	0.999179	-1.12267	1.69e-06	-0.0983767	0.949222
BMS1P21	NR_033857	5.17029	-2.10659	NA	-0.560822	NA	1.1896	NA	-0.356163	NA	-0.743677	NA	-0.650325	NA	0.192263	NA	0.0989104	NA	0.300867	0.721715	1.36317	NA
BMS1P22	NR_133911	0.0381486	0	NA	0	NA	0	NA	0	NA	0.823319	NA	0	NA	-0.803654	NA	0	NA	-0.0323041	NA	0.886364	NA
BMS1P2-AGAP9	NR_160414	905.538	0.0738611	0.800757	-0.0660635	0.867227	-0.0161919	0.962068	0.123733	0.976684	0.437464	0.00710998	0.216086	0.354443	-0.12249	0.784924	0.0988879	0.983954	-0.107296	0.498491	0.364012	0.604042
BMS1P4	NR_026592	710.294	0.106762	0.673489	0.0708597	0.844287	-0.0944517	0.684286	-0.0585491	1	0.281489	0.0971223	0.127781	0.626109	0.019881	0.981207	0.173589	0.672756	0.308883	0.0153736	0.175076	0.765679
BMS1P4-AGAP5	NR_160425	1596.46	0.122821	0.589163	0.0467077	0.901651	-0.0814757	0.71567	-0.00536247	1	0.241688	0.161087	0.115042	0.655203	0.030167	0.966468	0.156812	0.728319	0.219829	0.0783952	0.11922	0.834844
BMT2	NM_152556	1289.29	-0.417101	0.147038	-0.0188227	0.976243	0.156643	0.648436	-0.241635	0.809676	0.114867	0.811888	-0.0882337	0.869249	-0.240104	0.629671	-0.0370032	0.999179	0.15827	0.469015	0.532199	0.580178
BMX	NM_001721	0.212187	1.42877	NA	0	NA	0.922232	NA	2.37615	NA	0.823249	NA	0	NA	-0.803724	NA	0	NA	-0.0323354	NA	-0.605524	NA
BNC1	NM_001717	0.958183	0	NA	0.936527	NA	0.971403	NA	-0.0278758	NA	1.70232	NA	1.8146	NA	-0.397272	NA	-0.509546	NA	1.83963	NA	1.76557	NA
BNC2	NM_001317940	48.6431	-0.480155	0.581754	-0.418602	0.702539	-0.105512	0.922352	-0.167066	1	-0.132215	0.933722	0.0385431	NA	-0.387532	NA	-0.55829	0.87701	-2.23763	1.85e-06	0.348202	0.89754
BNC2-AS1	NR_151723	0	NA	NA	NA	NA	NA	NA	NA	NA	NA	NA	NA	NA	NA	NA	NA	NA	NA	NA	NA	NA
BNIP1	NM_001205	1657.44	0.119775	0.394655	-0.103512	0.526387	-0.177324	0.102053	0.0459631	1	0.0478074	0.816192	-0.0730617	0.683179	-0.023948	0.959363	0.0969211	0.795345	0.0318059	0.749672	-0.0716079	0.85956
BNIP2	NM_004330	10790.4	-0.215034	0.159255	-0.0358367	0.911806	0.113761	0.488211	-0.0654359	1	0.0474671	0.861676	-0.0270952	0.931964	-0.0864569	0.804156	-0.0118947	0.999179	-0.135765	0.214022	0.262735	0.614092
BNIP3	NM_004052	6188.98	-0.129238	0.625167	-0.321828	0.0937943	-0.107312	0.66383	0.0852773	1	-0.0767523	0.826769	-0.287605	0.154751	-0.142415	0.729895	0.0684376	0.999179	0.983164	1.15e-14	0.0527814	0.952467
BNIP3L	NM_004331	6923.9	-0.618748	0.283834	-0.588382	0.321559	0.143816	0.844819	0.11345	1	-0.301495	0.693552	-0.368308	0.612303	-0.044576	0.983772	0.0222374	0.999179	0.941565	0.00690907	0.317424	0.854023
BNIP5	NM_001010903	28.4918	-0.972187	0.232545	-1.45244	NA	0.646884	0.426732	1.12714	0.282743	-0.419958	0.64008	-0.15385	NA	0.153265	NA	-0.112842	0.999179	1.03511	0.0239133	0.552414	0.80363
BNIPL	NM_138278	42.4822	0.384283	0.468867	0.0718998	0.940524	-0.625114	0.130866	-0.31273	0.934328	0.341228	0.576158	0.262174	NA	-0.134602	NA	-0.0555478	0.999179	-0.362612	0.296558	-0.0427764	0.985475
BOC	NM_001301861	8.23118	-0.292117	NA	-0.0188694	NA	0.0213501	NA	-0.251897	NA	-0.106074	NA	0.357558	NA	0.218614	NA	-0.245017	NA	0.235875	0.841549	0.186687	NA
BOD1	NM_138369	2861.98	0.100707	0.30654	-0.0375271	0.818363	-0.0643887	0.505651	0.0738453	0.813902	-0.0356727	0.8104	-0.00923686	0.965195	0.0272155	0.923635	0.000779615	0.999686	0.0111412	0.88232	-0.136033	0.651574
BOD1L1	NM_148894	13308.5	0.00237974	0.990239	-0.0591018	0.763697	-0.116792	0.299928	-0.0553104	1	0.0568346	0.747495	0.051964	0.780602	-0.0442393	0.895065	-0.0393688	0.999179	-0.0534392	0.543236	0.0547796	0.894536
BOD1L2	NM_001257964	0.105103	-2.17478	NA	-2.13728	NA	0	NA	0	NA	0	NA	0	NA	0	NA	0	NA	-2.14362	NA	2.03573	NA
BOK	NM_032515	5.75016	0.206686	NA	0.0112287	NA	-0.555989	NA	-0.360532	NA	-1.27096	NA	-1.62976	NA	-0.203451	NA	0.15534	NA	-0.0265424	0.984323	-1.47752	NA
BOK-AS1	NR_033346	0.226601	0	NA	0	NA	0	NA	0	NA	-0.138376	NA	-0.176	NA	1.24593	NA	1.28355	NA	0.929349	NA	-0.0751812	NA
BOLA1	NM_016074	789.544	0.0923571	0.582882	0.0650146	0.784452	-0.0584889	0.726411	-0.0311464	1	-0.0530692	0.820719	0.0783043	0.702923	0.0807983	0.791349	-0.0505752	0.996976	-0.304377	0.000570953	-0.145031	0.732921
BOLA2	NM_001031827_dup1	320.214	0.582934	0.59475	0.34885	0.826946	-0.289936	0.802114	-0.055853	1	-1.05256	0.232549	-1.13732	0.199548	0.35773	0.884482	0.442489	0.973771	0.853012	0.166272	-1.63482	0.575807
BOLA2B	NM_001039182_dup1	262.676	0.566951	0.652984	0.333276	0.855876	-0.451827	0.702643	-0.218152	1	-1.14219	0.248132	-1.27217	0.194841	0.315419	0.918849	0.445407	0.988021	0.928455	0.175549	-1.70843	0.60385
BOLA2-SMG1P6	NM_001320627	458.184	-0.188011	0.317656	-0.180686	0.352978	0.141271	0.422833	0.133946	0.850719	-0.156061	0.439209	-0.231936	0.1822	0.147066	0.618468	0.222942	0.345991	-0.312257	0.0052301	0.0321998	0.966235
BOLA3	NM_212552	4119.27	0.181614	0.116875	0.100215	0.530357	0.00260894	0.990315	0.0840086	0.918879	0.149743	0.208168	0.100337	0.50557	0.0598514	0.838693	0.109258	0.689233	-0.057191	0.534769	-0.0314923	0.94985
BOLA3-AS1	NR_045637	77.016	0.20963	0.723668	0.325358	0.591697	0.404094	0.327819	0.288367	0.919852	0.224604	0.680808	0.348909	0.439828	0.129162	0.913098	0.00485716	0.999373	0.935246	0.000496631	0.0151805	0.995582
BOLL	NM_197970	1.18621	-1.8228	NA	-0.823497	NA	3.46799	NA	2.46871	NA	-0.532161	NA	-0.199844	NA	-0.0585238	NA	-0.390838	NA	1.66028	0.416902	1.29143	NA
BOP1	NM_015201	19978	0.0765068	0.750583	-0.00919158	0.98333	-0.0429531	0.861464	0.0427453	1	-0.0172969	0.96155	0.0502537	0.880493	0.0295994	0.966468	-0.0379513	0.999179	-0.324125	0.0048104	-0.0934816	0.876723
BORA	NM_024808	3986.9	-0.151051	0.435733	0.0113349	0.974421	0.149805	0.375189	-0.0125814	1	0.0655558	0.814737	0.149878	0.453707	0.0621705	0.900639	-0.0221517	0.999179	-0.107278	0.385417	0.216885	0.680872
BORCS5	NM_058169	2530.41	-0.0292074	0.836436	0.0563923	0.715629	0.0402984	0.742406	-0.0453013	1	-0.0155153	0.934767	0.05592	0.68834	0.0348801	0.903057	-0.0365551	0.995108	0.240136	8.98e-05	0.0140274	0.97295
BORCS6	NM_017622	3685.96	-0.117231	0.25352	0.0749996	0.564954	0.0153795	0.916555	-0.176851	0.044159	-0.174895	0.0283818	0.132751	0.153064	0.233779	0.00212644	-0.0738667	0.804808	-0.0182248	0.81756	-0.05734	0.854023
BORCS7	NM_001136200	1401.64	-0.0500287	0.801643	-0.138111	0.422291	-0.0550228	0.759109	0.0330597	1	-0.00360569	0.991322	-0.117584	0.508409	-0.0850344	0.782823	0.0289438	0.999179	-0.0881745	0.402515	0.0467164	0.933595
BORCS7-ASMT	NR_037644	972.024	-0.0624108	0.707449	0.0684222	0.733775	0.114714	0.35272	-0.0161186	1	-0.0662673	0.736371	-0.00511275	0.986672	0.0942882	0.702732	0.0331337	0.999179	-0.605599	7.36e-15	-0.00354713	0.997328
BORCS8	NM_001145784	2669.61	0.0408505	0.850479	0.11505	0.564798	0.0837489	0.623437	0.00954902	1	0.103092	0.589163	0.149284	0.365724	0.039279	0.933524	-0.00691327	0.999179	-0.0286749	0.812213	0.0625916	0.90787
BORCS8-MEF2B	NR_027307	6140.8	-0.0606505	0.676894	0.11229	0.387117	0.0873505	0.453632	-0.0855902	0.85543	-0.18737	0.0371992	0.128318	0.249716	0.199864	0.0374546	-0.115824	0.519805	1.47485	8.63e-115	-0.126404	0.707189
BPESC1	NR_026783	0.040976	0	NA	0	NA	0	NA	0	NA	-1.10008	NA	-1.13771	NA	0	NA	0	NA	0.929284	NA	-1.03688	NA
BPGM	NM_001724	2807.97	1.16948	5.06e-76	0.0888034	0.539595	0.0245552	0.861442	1.10523	1.06e-68	1.35776	1.84e-111	0.196311	0.0248466	-0.131999	0.220866	1.02945	1.24e-64	0.592017	8.73e-20	0.188577	0.580178
BPHL	NM_004332	1458.38	0.114621	0.546599	0.154657	0.401045	-0.0331537	0.880538	-0.0731903	1	-0.0109447	0.972396	0.116431	0.564406	0.0529892	0.912625	-0.0743869	0.98307	0.052059	0.669818	-0.125168	0.79467
BPI	NM_001725	0.15164	0	NA	0	NA	0	NA	0	NA	0.823277	NA	0	NA	1.52678	NA	2.52602	NA	-0.0323881	NA	0.886532	NA
BPIFA1	NM_016583	0.0730826	-1.70314	NA	-1.66564	NA	0	NA	0	NA	0	NA	0	NA	0	NA	0	NA	-1.67248	NA	1.56464	NA
BPIFA2	NM_080574	0.247616	0.883385	NA	1.66061	NA	0.0251848	NA	-0.751939	NA	2.06066	NA	0	NA	-2.04098	NA	0	NA	-0.0324476	NA	1.17802	NA
BPIFA3	NM_001042439	0	NA	NA	NA	NA	NA	NA	NA	NA	NA	NA	NA	NA	NA	NA	NA	NA	NA	NA	NA	NA
BPIFA4P	NR_026760	0	NA	NA	NA	NA	NA	NA	NA	NA	NA	NA	NA	NA	NA	NA	NA	NA	NA	NA	NA	NA
BPIFB1	NM_033197	0.111215	-1.02444	NA	-0.986934	NA	0	NA	0	NA	0.823285	NA	0.78566	NA	-0.803689	NA	-0.76607	NA	-0.993823	NA	1.84774	NA
BPIFB2	NM_025227	8.90409	1.04931	NA	0.215148	NA	-0.775658	NA	0.0585011	1	0.429441	NA	-0.121945	NA	-0.0690182	NA	0.482367	0.992605	1.2959	0.149743	-0.619372	NA
BPIFB3	NM_182658	0.102315	0	NA	0.936474	NA	0	NA	-0.989562	NA	1.50371	NA	0	NA	-1.48403	NA	0	NA	-0.0323591	NA	1.56708	NA
BPIFB4	NM_182519	0.332952	-0.0769881	NA	1.35556	NA	-0.937898	NA	-2.37036	NA	0.823307	NA	2.24057	NA	-0.803759	NA	-2.22093	NA	-0.994096	NA	0.900469	NA
BPIFB6	NM_174897	8.88179	0.513077	NA	-0.744444	NA	-0.7811	NA	0.476418	1	0.21637	NA	-0.0999546	NA	0.00466458	NA	0.320989	0.999179	1.04083	0.182789	-0.296164	NA
BPIFC	NM_174932	1.922	1.19819	NA	-1.0985	NA	-1.44972	NA	0.846951	NA	-1.46595	NA	-0.370937	NA	-1.18538	NA	-2.28038	NA	0.0836376	0.972259	-2.66376	NA
BPNT1	NM_006085	7946.02	0.186307	0.0628275	0.162919	0.11993	0.00875402	0.961377	0.0321416	1	0.123425	0.286524	0.102924	0.4295	0.0169452	0.968608	0.0374468	0.999179	-0.0986853	0.210552	-0.0625292	0.866091
BPTF	NM_182641	20889.3	-0.057997	0.520857	0.0410992	0.737348	-0.00184682	0.988774	-0.100943	0.28893	0.0273833	0.828701	0.0984351	0.188041	-0.0441737	0.785519	-0.115226	0.150931	-0.131126	0.0072071	0.0856904	0.708702
BPY2	NM_004678	0	NA	NA	NA	NA	NA	NA	NA	NA	NA	NA	NA	NA	NA	NA	NA	NA	NA	NA	NA	NA
BPY2B	NM_001002760	0	NA	NA	NA	NA	NA	NA	NA	NA	NA	NA	NA	NA	NA	NA	NA	NA	NA	NA	NA	NA
BPY2C	NM_001002761	0	NA	NA	NA	NA	NA	NA	NA	NA	NA	NA	NA	NA	NA	NA	NA	NA	NA	NA	NA	NA
BRAF	NM_001354609	5288.04	-0.117143	0.469196	-0.151776	0.326165	-0.0586521	0.734631	-0.0240187	1	0.0364842	0.886048	-0.0515483	0.820655	-0.107532	0.661718	-0.0194992	0.999179	0.757112	1.37e-19	0.153884	0.716529
BRAP	NM_006768	4987.37	0.00182941	0.987385	-0.00906659	0.947155	-0.00368473	0.972763	0.00721127	1	-0.0376774	0.687138	0.0173009	0.88765	0.015186	0.945426	-0.0397923	0.92526	0.0034868	0.952281	-0.0392073	0.854023
BRAT1	NM_152743	6733.42	0.0340347	0.828974	-0.0598118	0.738267	-0.153978	0.110074	-0.0601311	0.993159	-0.116528	0.31942	-0.0260934	0.902491	0.00071689	0.999573	-0.0897176	0.775419	-0.367271	5.72e-08	-0.15023	0.673243
BRCA1	NM_007298	5334.49	-0.00418895	0.981027	-0.0674349	0.617904	-0.125413	0.144693	-0.062167	0.938707	0.00168854	0.994098	-0.0442001	0.773984	-0.165678	0.0646129	-0.119789	0.368221	-0.391517	2.25e-11	0.00622682	0.990981
BRCA2	NM_000059	6734.55	-0.10897	0.712702	-0.07697	0.851065	0.0598515	0.842767	0.0278514	1	0.198904	0.429961	0.0972642	0.786635	-0.10778	0.841141	-0.00613963	0.999179	-0.0674463	0.698835	0.308131	0.673243
BRCC3	NM_001242640	6521.61	-0.18288	0.109979	-0.0635859	0.751963	0.0949559	0.453371	-0.0243383	1	-0.0332397	0.880016	0.0604661	0.748378	-0.0110358	0.983361	-0.104742	0.726575	-0.191596	0.0160426	0.149928	0.694883
BRD1	NR_146334	7605.49	0.00840581	0.930183	-0.0416264	0.614066	-0.0573364	0.316476	-0.00730422	1	-0.0435838	0.549802	-0.0409718	0.599812	-0.0184849	0.920237	-0.0210969	0.997999	-0.042038	0.318881	-0.0517125	0.769689
BRD2	NM_001199456	39127	0.176647	0.00610215	-0.21337	0.000396852	-0.2648	3.08e-06	0.125216	0.15601	0.054489	0.613671	-0.187852	0.00342544	-0.142044	0.0605562	0.100296	0.384263	0.112879	0.0399129	-0.121837	0.656172
BRD3	NM_007371	5120.19	-0.120489	0.212542	-0.110472	0.268161	-0.158748	0.0414379	-0.168764	0.0526667	-0.183671	0.0168867	-0.102274	0.326008	-0.158432	0.0856526	-0.239829	0.00108525	-0.689802	3.6e-34	-0.0628645	0.829936
BRD3OS	NR_149319	1710.57	-0.130441	0.284779	-0.108613	0.424458	-0.00958639	0.959412	-0.031414	1	-0.209116	0.021878	-0.155091	0.149799	0.0242586	0.950082	-0.029767	0.999179	0.104089	0.186813	-0.0783854	0.824178
BRD4	NM_058243	25391.2	0.162817	0.119909	-0.0819331	0.589639	-0.244501	0.00322143	0.000249287	1	-0.0295806	0.88374	-0.0653087	0.680666	-0.0359958	0.915908	-0.000267747	0.99998	0.00421824	0.966172	-0.192069	0.601658
BRD7	NM_001173984	10952.8	-0.00334673	0.97713	-0.0684269	0.357686	-0.078176	0.19822	-0.0130958	1	0.0231349	0.836102	-0.00376225	0.980988	-0.107303	0.0875773	-0.0804057	0.380123	-0.194786	1.57e-06	0.0267954	0.912272
BRD7P3	NR_002730	0.0839445	0	NA	0	NA	1.86402	NA	1.82652	NA	0	NA	0	NA	0	NA	0	NA	-0.0322732	NA	-0.075495	NA
BRD8	NM_006696	7044.62	0.0450576	0.633467	0.0435055	0.708689	-0.0760265	0.293174	-0.0744743	0.634606	-0.0150865	0.916528	-0.00871099	0.959485	-0.0476277	0.759618	-0.0540032	0.846238	-0.162373	0.000651506	-0.0598284	0.794799
BRD9	NM_023924	6709.53	0.0359294	0.720426	-0.0504886	0.642455	-0.0667955	0.371891	0.0196225	1	-0.04293	0.689345	-0.00464102	0.979859	0.0455205	0.778664	0.00723152	0.999179	-0.292452	2.07e-10	-0.0785502	0.733715
BRDT	NM_001242807	0.85758	-1.02455	NA	-0.0252489	NA	0.971391	NA	-0.0278792	NA	0.286941	NA	1.70011	NA	-1.7249	NA	-3.13804	NA	1.42521	NA	1.31192	NA
BRDTP1	NR_003539	0.0397528	0	NA	0	NA	0	NA	0	NA	0	NA	0	NA	1.11975	NA	1.15737	NA	-0.0324081	NA	-0.075225	NA
BREA2	NR_015445	20.7429	0.151377	0.873661	-0.11534	NA	-0.00642243	NA	0.260295	1	0.657279	0.418912	0.247263	NA	-0.634599	NA	-0.224583	0.999179	-1.07813	0.0206681	0.506278	0.807385
BRF1	NM_001242789	4399.46	-0.00986366	0.954233	-0.0478139	0.793766	-0.0922621	0.381234	-0.0543119	1	-0.192785	0.0255009	-0.107603	0.358947	-0.050362	0.848428	-0.135544	0.331421	-0.207832	0.00203533	-0.182629	0.60385
BRF2	NM_018310	1831.21	-0.0479879	0.748887	0.0889983	0.53908	0.0753656	0.53014	-0.0616206	0.98846	-0.179202	0.0477997	0.0042797	0.986337	0.154988	0.161519	-0.0284937	0.999179	0.454414	8.02e-12	-0.130904	0.696839
BRI3	NM_015379	3013.56	0.0378941	0.858068	0.0104874	0.9726	-0.000947162	0.996465	0.0264596	1	-0.17481	0.212295	-0.151174	0.332803	0.0790285	0.807733	0.0553924	0.994484	0.306786	0.000785296	-0.212415	0.656827
BRI3BP	NM_080626	20157.5	-0.0768342	0.629077	0.0084338	0.974421	-0.0527532	0.735569	-0.138021	0.530925	-0.134353	0.311985	0.0497914	0.808942	-0.0605246	0.844952	-0.24467	0.0262132	-0.311871	8.28e-05	-0.0572013	0.899136
BRICD5	NM_182563	331.137	0.0233297	0.955832	0.185041	0.600234	0.213431	0.407796	0.0517199	1	0.128806	0.743565	0.32703	0.208752	-0.00165805	0.999573	-0.199881	0.797616	-0.411564	0.0154216	0.105824	0.912219
BRINP1	NM_014618	0.829152	-1.02455	NA	-0.0252469	NA	0	NA	-0.989671	NA	-0.249966	NA	-0.969637	NA	-2.42893	NA	-1.70927	NA	2.66646	NA	0.774922	NA
BRINP2	NM_021165	2.21147	4.08492	NA	2.35439	NA	-2.27448	NA	-0.543965	NA	0.578922	NA	-1.16806	NA	0.159324	NA	1.90629	NA	3.82774	0.0357344	-3.50542	NA
BRINP3	NM_199051	0.515264	-0.0378758	NA	1.32262	NA	2.03665	NA	0.676247	NA	-0.988881	NA	-1.9883	NA	-0.803774	NA	0	NA	0.817603	NA	-0.949811	NA
BRIP1	NM_032043	4129.28	-0.257273	0.123489	0.227084	0.190638	0.331615	0.0170885	-0.152742	0.764775	0.0642328	0.826978	0.326755	0.0275854	0.0887987	0.83374	-0.173724	0.601576	-0.471382	1.69e-05	0.321754	0.577627
BRIX1	NM_018321	6893.2	-0.0353447	0.886934	-0.234613	0.129907	-0.0378233	0.869384	0.161445	0.646739	0.0402172	0.897315	-0.191964	0.264138	-0.157941	0.515896	0.0742402	0.988021	-0.362277	0.000510293	0.0758205	0.897199
BRK1	NM_018462	12138.5	-0.117062	0.09941	0.057119	0.582968	0.169451	0.00310384	-0.00473049	1	-0.0651607	0.45669	-0.0283568	0.819945	0.0289582	0.894662	-0.00784564	0.999179	0.249847	9.76e-08	0.0522068	0.825091
BRMS1	NM_015399	8779.62	-0.0116263	0.946105	0.0493752	0.784452	0.0418856	0.74728	-0.0191159	1	-0.115975	0.282924	-0.0441478	0.792679	0.0821677	0.659572	0.0103407	0.999179	-0.236434	0.000348479	-0.104056	0.742033
BRMS1L	NM_032352	1733.4	-0.0380002	0.871347	-0.0469105	0.876665	0.132098	0.406334	0.141008	0.737138	0.122363	0.496477	0.0577857	0.81696	0.0270787	0.964049	0.0916555	0.923469	0.731004	5.95e-15	0.160622	0.733753
BROX	NM_144695	2496.81	-0.00946932	0.97713	0.0449671	0.905147	0.0333888	0.900973	-0.0210476	1	0.073473	0.806451	-0.11367	0.66251	-0.153251	0.618676	0.033892	0.999179	0.221214	0.0766326	0.0831713	0.899136
BRPF1	NM_001003694	6809.14	0.0681199	0.438673	-0.0988752	0.200014	-0.122747	0.0565997	0.044248	0.980771	-0.141979	0.0234599	-0.0735147	0.401355	0.00138192	0.997313	-0.0670829	0.720056	-0.0343656	0.555092	-0.20981	0.159901
BRPF3	NM_015695	5072.17	0.147796	0.15254	-0.127261	0.249477	-0.246896	0.00162375	0.0281616	1	0.0992293	0.387405	-0.0263935	0.891634	-0.0403225	0.89119	0.0853003	0.761967	0.641731	1.33e-24	-0.048259	0.89693
BRS3	NM_001727	0.701452	1.69304	NA	0	NA	1.57011	NA	3.28837	NA	-1.95717	NA	-0.137046	NA	3.50695	NA	1.68689	NA	1.78598	NA	-3.64951	NA
BRSK1	NM_032430	61.2188	0.161593	0.817422	-0.0837465	0.935585	-0.50739	0.298584	-0.262051	1	0.00379039	0.997154	-0.392031	0.407536	-0.63067	0.136867	-0.234849	0.952532	1.56997	2.15e-08	-0.157544	0.929132
BRSK2	NM_001256630	7.96865	0.258448	NA	-0.51122	NA	-0.785062	NA	-0.0153968	NA	0.211841	NA	0.433085	NA	-0.393412	NA	-0.614655	NA	0.418222	0.652848	-0.0461574	NA
BRWD1	NM_001007246	728.291	-0.275965	0.0831606	-0.158585	0.453637	-0.036111	0.884978	-0.153492	0.76037	-0.302302	0.0329996	-0.326937	0.022525	-0.031526	0.963448	-0.00689182	0.999179	-0.457422	1.96e-05	-0.0260608	0.971992
BRWD1-AS1	NR_046655	5.19646	-0.931004	NA	0.156519	NA	0.65101	NA	-0.436509	NA	-0.00778002	NA	0.0385927	NA	0.16173	NA	0.115358	NA	0.156822	0.892599	0.92465	NA
BRWD1-AS2	NR_111942	49.1386	-0.218322	0.762747	0.402917	0.552462	0.193326	0.772101	-0.427914	0.790725	0.180984	0.823416	0.126828	NA	-0.153261	NA	-0.0991049	0.999179	-0.184766	0.638121	0.39965	0.797581
BRWD3	NM_153252	4226.12	0.0179781	0.927787	-0.0995117	0.528752	-0.0946516	0.451501	0.0228382	1	0.30574	0.000352891	0.00631458	0.981299	-0.21165	0.0496307	0.0877752	0.833634	0.409515	3.01e-08	0.288064	0.292569
BSCL2	NM_032667	3732.53	0.0334454	0.775174	-0.019173	0.913227	-0.031404	0.767834	0.0212144	1	-0.0849929	0.344264	0.0223667	0.88396	0.109139	0.234937	0.00177972	0.999179	0.211384	5.79e-05	-0.118112	0.66822
BSDC1	NM_018045	4820.57	0.0297438	0.882944	-0.122383	0.459828	-0.183185	0.124154	-0.0310591	1	-0.162769	0.219078	-0.22193	0.0639795	-0.0278782	0.9536	0.0312836	0.999179	-0.0402545	0.703693	-0.192234	0.664467
BSG	NM_198589	49909.3	0.045555	0.792635	0.0496965	0.826114	-0.00743748	0.9713	-0.011579	1	-0.0526226	0.791942	0.0387897	0.865249	0.0814836	0.748923	-0.00992866	0.999179	0.0640338	0.494508	-0.0978499	0.799552
BSN	NM_003458	64.9103	0.0558335	0.939873	0.115053	0.89728	-0.258464	0.612755	-0.317683	0.900811	-0.0976057	0.91443	-0.293778	0.663082	0.21033	0.863305	0.406502	0.728319	-0.588852	0.0557471	-0.153153	0.932937
BSND	NM_057176	2.12579	1.57442	NA	3.54138	NA	1.91102	NA	-0.0559074	NA	-0.206515	NA	-0.3366	NA	0.10185	NA	0.231933	NA	4.15608	0.0376395	-1.78108	NA
BSN-DT	NR_038866	9.1614	0.279975	NA	0.179156	NA	0.255399	NA	0.356218	1	0.364627	NA	0.0289719	NA	-0.428741	NA	-0.093087	0.999179	-0.552442	0.510347	0.0847993	NA
BSPH1	NM_001128326	0.0397528	0	NA	0	NA	0	NA	0	NA	0	NA	0	NA	1.11975	NA	1.15737	NA	-0.0324081	NA	-0.075225	NA
BSPRY	NM_017688	596.697	-0.221723	0.536355	-0.0638632	0.916417	0.0960035	0.805686	-0.0618563	1	-0.00435853	0.99424	-0.0491648	0.927964	0.215319	0.645572	0.260125	0.626929	2.0366	1.96e-33	0.217719	0.802978
BST1	NM_004334	24.8994	-0.340811	0.728596	-0.495057	NA	-0.0283042	0.98191	0.125941	1	-0.155491	0.8995	0.196781	NA	0.486204	NA	0.133932	0.999179	0.790074	0.0884234	0.185874	0.948076
BST2	NM_004335	38904.3	0.306179	0.0100053	0.0723164	0.77656	0.0646898	0.721761	0.298552	0.0177115	0.270953	0.0258679	0.0794865	0.721806	0.0431751	0.925515	0.234642	0.125564	0.55932	7.65e-10	-0.0348869	0.957176
BSX	NM_001098169	0.301501	-0.077042	NA	-0.0252252	NA	0.0239575	NA	-0.0278564	NA	-1.1002	NA	-0.176032	NA	1.11976	NA	0.19566	NA	-0.0323634	NA	-1.02296	NA
BTAF1	NM_003972	20413	0.0950789	0.666964	-0.0722584	0.813101	-0.0595151	0.787884	0.107822	0.951322	0.2127	0.201817	-0.0340739	0.922138	-0.164917	0.513276	0.0818569	0.98307	0.463242	1.58e-05	0.117888	0.825091
BTBD1	NM_025238	14580.6	-0.0142252	0.946536	-0.0583581	0.794173	0.035679	0.83775	0.0798119	0.956239	0.139885	0.294878	-0.00905401	0.977939	-0.0990325	0.669504	0.0499062	0.994484	0.0350276	0.732252	0.154375	0.696517
BTBD10	NM_032320	4162.16	-0.0093366	0.956021	-0.0871116	0.508618	-0.0616372	0.596028	0.0161378	1	0.0533654	0.722836	-0.0631835	0.662861	-0.0849086	0.620141	0.0316404	0.999179	0.0378607	0.631413	0.0629623	0.84868
BTBD11	NM_001017523	1.13219	-0.367347	NA	-0.0257299	NA	0.795362	NA	0.453751	NA	0.908813	NA	1.16325	NA	0.389237	NA	0.134802	NA	-0.600616	0.840102	1.27571	NA
BTBD16	NM_144587	0.907955	-0.78024	NA	0.0134835	NA	-0.00694582	NA	-0.800639	NA	-3.0168	NA	-0.548713	NA	0.158018	NA	-2.31001	NA	2.11198	NA	-2.23596	NA
BTBD17	NM_001080466	0.161653	0	NA	0	NA	0.971319	NA	0.933818	NA	-0.138356	NA	-1.13776	NA	0.158073	NA	1.15732	NA	0.929371	NA	-0.0752596	NA
BTBD18	NM_001145101	2.46605	-2.45562	NA	0.907194	NA	2.4268	NA	-0.935976	NA	-3.15039	NA	-1.8616	NA	2.86317	NA	1.57439	NA	1.48369	0.308409	-0.694673	NA
BTBD19	NM_001136537	211.778	-0.225668	0.569568	-0.491621	0.107662	-0.466452	0.118979	-0.200499	0.976684	-0.159451	0.682202	-0.378814	0.159655	-0.182266	0.748088	0.0370975	0.999179	1.7283	6.41e-22	0.0664485	0.960132
BTBD2	NM_017797	10113.1	-0.0275614	0.870835	-0.105313	0.445509	-0.126419	0.237702	-0.0486676	1	-0.151919	0.15414	-0.0736254	0.64031	0.0238938	0.952412	-0.0543996	0.982484	-0.0851027	0.296765	-0.124029	0.719138
BTBD3	NM_181443	1067.86	-0.230171	0.220154	-0.133656	0.59517	-0.00602826	0.984394	-0.102543	0.986534	0.0210012	0.956285	-0.0958351	0.729489	-0.168251	0.551426	-0.0514145	0.999179	-0.34513	0.00320152	0.25148	0.673243
BTBD6	NM_033271	3598.35	-0.118977	0.142638	-0.0495437	0.700412	-0.0314723	0.764819	-0.100906	0.412141	-0.156296	0.0246829	-0.0109141	0.956397	0.0669155	0.661298	-0.078466	0.664184	-0.421655	1.39e-16	-0.0369979	0.902126
BTBD7	NM_001002860	4287.82	0.0810951	0.386355	0.0292214	0.850192	-0.0144242	0.906287	0.0374494	1	0.0810777	0.365565	-0.0013734	0.993997	-0.0721932	0.579389	0.0102579	0.999179	0.229982	8.57e-06	0.000277337	0.999057
BTBD8	NM_183242	6.01569	-0.969674	NA	-0.42848	NA	0.688566	NA	0.147372	NA	0.316247	NA	-0.252563	NA	0.244163	NA	0.812972	NA	-0.717474	0.453496	1.28569	NA
BTBD9	NM_001099272	2839.16	0.0378131	0.765382	-0.130754	0.137009	-0.177024	0.0154066	-0.00845671	1	0.0407917	0.77303	-0.0654448	0.58708	-0.128505	0.181761	-0.0222683	0.999179	0.112559	0.0692582	0.00328743	0.995582
BTBD9-AS1	NR_144472	0.0375527	0	NA	0.936504	NA	0	NA	-0.989533	NA	0	NA	0	NA	0	NA	0	NA	-0.0324775	NA	-0.0751382	NA
BTC	NM_001316963	0.289764	0	NA	0	NA	1.95258	NA	1.91508	NA	-1.9457	NA	-0.0852751	NA	1.11967	NA	-0.740491	NA	1.77447	NA	-1.88215	NA
BTD	NM_001281726	155.259	0.0224403	0.952763	-0.0941253	0.821545	-0.153367	0.546872	-0.0368018	1	-0.240778	0.27921	-0.157938	0.571802	0.107693	0.838693	0.0248528	0.999179	0.384792	0.00773756	-0.262883	0.700285
BTF3	NM_001207	62270.3	0.0459877	0.7214	0.0247059	0.899045	-0.00289486	0.985806	0.018387	1	0.00871681	0.963723	-0.0170725	0.930288	0.00706014	0.985177	0.0328495	0.999179	-0.211392	0.00053157	-0.0369273	0.919979
BTF3L4	NM_152265	3759.58	-0.156369	0.507708	-0.112279	0.725037	0.0308695	0.917858	-0.0132203	1	-0.0260327	0.949005	-0.16196	0.513615	-0.161737	0.635137	-0.0258098	0.999179	-0.0196811	0.906558	0.130575	0.833266
BTF3P11	NR_026983	0.292616	1.85985	NA	0	NA	-1.91293	NA	0	NA	2.48004	NA	1.68217	NA	-2.46031	NA	-1.66256	NA	-0.0322587	NA	0.619211	NA
BTG1	NM_001731	43905	0.359304	0.0169647	0.627784	5.47e-07	0.572834	6.55e-06	0.304354	0.0911096	0.293269	0.06325	0.270614	0.114738	0.326639	0.0490768	0.349294	0.0305918	0.718113	1.54e-10	-0.0657803	0.927119
BTG2	NM_006763	35442.7	-0.0917632	0.469493	0.0675641	0.68317	0.0766561	0.515538	-0.0826711	0.865336	-0.0819822	0.54502	-0.004526	0.986337	0.0717187	0.744417	-0.00573759	0.999179	0.854605	1.93e-39	0.0101142	0.985352
BTG3	NM_006806	4290.01	0.0664658	0.568425	-0.248816	0.000387968	-0.265503	9.16e-05	0.0497788	1	-0.065728	0.567125	-0.256163	0.000111292	-0.133095	0.154485	0.05734	0.909711	0.535683	1e-21	-0.131939	0.666181
BTG3-AS1	NR_149073	141.629	0.0470044	0.929074	0.023477	0.9726	-0.153263	0.691054	-0.129736	1	-0.201797	0.54321	-0.16556	0.661521	0.100831	0.898194	0.0645937	0.999179	0.873228	2.48e-06	-0.248512	0.782664
BTG4	NM_017589	0.65182	0.475832	NA	0.46791	NA	-2.82956	NA	-2.82164	NA	-2.97871	NA	-2.05454	NA	0	NA	-0.766152	NA	0.506915	NA	-3.45371	NA
BTK	NM_000061	22210.7	0.042281	0.647627	0.0591196	0.534077	-0.0185856	0.851664	-0.0354241	1	0.0165009	0.906054	0.0591096	0.510872	-0.000121174	0.999743	-0.0427298	0.928359	0.0445848	0.40105	-0.0254448	0.928832
BTLA	NM_181780	7421.69	-0.391873	0.019717	0.205435	0.382488	0.490846	0.00101513	-0.106462	1	-0.0753514	0.823309	0.157895	0.542044	0.112473	0.806578	-0.120773	0.926919	0.323488	0.0150158	0.316751	0.644889
BTN1A1	NM_001732	249.937	-0.254048	0.367101	0.467913	0.0221154	0.274736	0.250958	-0.447226	0.0477684	-0.308799	0.46496	0.453427	0.170181	0.474677	0.225962	-0.287549	0.726314	-2.90703	1.29e-56	-0.0543805	0.968493
BTN2A1	NM_007049	3785.33	0.175631	0.0686737	0.0709104	0.651306	-0.0560924	0.652323	0.0486279	1	0.121829	0.263064	0.0109799	0.965195	-0.0327441	0.922218	0.0781047	0.839058	-0.0576464	0.470829	-0.0534916	0.886101
BTN2A2	NM_001197237	5230.46	0.0845183	0.565759	0.0898447	0.585018	0.0271613	0.871531	0.0218349	1	0.0350986	0.869979	-0.0102816	0.972473	-0.0405277	0.913869	0.0048526	0.999179	-0.179735	0.0229481	-0.0491028	0.912219
BTN2A3P	NR_027795	406.22	0.0226305	0.942604	0.0224346	0.954399	0.0598099	0.811286	0.0600058	1	0.273559	0.107518	0.230323	0.234169	-0.125172	0.740121	-0.0819352	0.989185	-0.0903934	0.532996	0.251228	0.675181
BTN3A1	NM_007048	3233.77	0.437966	7.11e-12	0.198489	0.0148825	0.053178	0.641312	0.292655	2.91e-05	0.310203	2.29e-06	0.159427	0.0655914	0.0737599	0.671632	0.224536	0.00296916	0.651766	8.63e-28	-0.127445	0.67984
BTN3A2	NM_007047	9512.48	0.352675	2.19e-08	0.263602	0.000132698	0.124314	0.146715	0.213386	0.00484328	0.170478	0.0300339	0.153651	0.0735614	0.105135	0.385952	0.121962	0.330536	0.281541	2.25e-06	-0.181856	0.566102
BTN3A3	NM_006994	3088.57	0.467746	7.55e-17	0.229914	0.000591259	0.0576424	0.552213	0.295474	9.75e-07	0.323348	5.13e-09	0.0586132	0.60788	-0.00252316	0.99305	0.262212	8.61e-06	0.920902	5.46e-69	-0.144073	0.623755
BTNL10	NM_001287262	0	NA	NA	NA	NA	NA	NA	NA	NA	NA	NA	NA	NA	NA	NA	NA	NA	NA	NA	NA	NA
BTNL2	NM_001304561	12.1269	0.187781	NA	0.652033	NA	-0.169582	NA	-0.633834	0.857794	-0.46737	NA	-0.760513	NA	0.285666	NA	0.578809	0.871697	0.610718	0.30996	-0.654594	0.799033
BTNL3	NM_197975	0.644292	-1.45859	NA	-0.820027	NA	1.04877	NA	0.410222	NA	-0.138425	NA	-1.13784	NA	-0.803767	NA	0	NA	-2.2261	NA	1.32013	NA
BTNL8	NM_001159710	7.28156	0.00373065	NA	-0.0634206	NA	-0.679314	NA	-0.612163	NA	-1.15108	NA	-3.03411	NA	1.46607	NA	3.34908	NA	-3.46978	0.000403165	-1.15463	NA
BTNL9	NM_152547	2416.38	-0.0152379	0.974455	-0.0357574	0.948151	0.000806424	0.998827	0.0213259	1	-0.0744424	0.887843	-0.163417	0.693249	-0.0873611	0.922218	0.00161351	0.999686	-3.48181	2.29e-101	-0.0588655	0.961854
BTRC	NM_033637	3156.09	0.0216015	0.848349	-0.0191528	0.904266	-0.103216	0.136802	-0.0624618	0.829077	0.0653201	0.461522	0.0190167	0.894452	-0.0652971	0.60161	-0.0189937	0.999179	0.106579	0.0385183	0.0440044	0.861929
BUB1	NM_004336	24148.3	0.0771514	0.653152	0.174648	0.188905	0.211038	0.0620553	0.113542	0.78719	0.314586	0.00155611	0.2911	0.00628552	0.0650533	0.842309	0.088539	0.888079	-0.229584	0.00838427	0.237755	0.588747
BUB1B	NM_001211	16228.9	-0.0659412	0.698184	0.0644081	0.769239	0.028622	0.875385	-0.101727	0.839693	0.0434524	0.846284	0.200637	0.0885289	0.00592526	0.989359	-0.151259	0.426535	-0.428227	6.69e-08	0.109727	0.777988
BUB1B-PAK6	NM_001128629	360.959	-0.0345101	0.889576	0.155189	0.428681	-0.00571699	0.983287	-0.195416	0.420248	-0.358135	0.0144332	-0.0363301	0.919045	0.160876	0.599434	-0.160929	0.705752	-0.712577	1.25e-11	-0.323343	0.575807
BUB3	NM_001007793	23890	-0.0736538	0.449345	-0.0221913	0.896563	0.0702016	0.418679	0.0187391	1	-0.086571	0.345286	-0.0422671	0.748784	0.00373971	0.989841	-0.0405641	0.98341	-0.426211	9.57e-17	-0.0126259	0.971992
BUD13	NM_032725	5075.98	0.0437025	0.773511	-0.0886517	0.539595	-0.124152	0.227916	0.00820188	1	-0.058061	0.721308	-0.0720739	0.637003	-0.0326367	0.923981	-0.0186238	0.999179	-0.326868	1.63e-06	-0.101407	0.760205
BUD23	NM_017528	10812.7	0.0692099	0.623812	0.0579835	0.757482	0.00862427	0.962068	0.0198507	1	0.0432227	0.816483	0.019148	0.934702	-0.015811	0.971547	0.00826378	0.999179	-0.223105	0.00187111	-0.0256551	0.957737
BUD31	NM_001370407	8752.15	0.0693405	0.668783	-0.040038	0.866126	-0.118163	0.342204	-0.00878483	1	-0.0880719	0.586433	-0.153857	0.233075	-0.0599193	0.84839	0.00586629	0.999179	-0.0998652	0.2667	-0.157074	0.69063
BVES	NM_001199563	16.2243	-1.82731	0.0292463	-0.413343	NA	1.42355	NA	0.00958956	1	-0.0375521	0.98097	0.172384	NA	0.251483	NA	0.0415473	0.999179	0.589812	0.2763	1.78993	0.482102
BVES-AS1	NR_037157	0.194711	0	NA	0	NA	0.971306	NA	0.933805	NA	1.70243	NA	0	NA	0.0949614	NA	1.97324	NA	-0.0322528	NA	1.76554	NA
BYSL	NM_004053	4733.81	0.055727	0.719403	-0.101951	0.482441	-0.0520785	0.709324	0.105599	0.725624	-0.0428497	0.82594	-0.124439	0.326466	-0.0178197	0.967857	0.0637698	0.953805	-0.356594	7e-07	-0.0982656	0.780299
BZW1	NM_001207069	25140.8	-0.100963	0.428373	-0.00185609	0.995153	0.115678	0.280648	0.0165719	1	0.0593117	0.717109	0.051358	0.772407	-0.018448	0.966468	-0.0104943	0.999179	0.036793	0.672603	0.160545	0.663268
BZW2	NM_001159767	2251.84	-0.0400868	0.831057	-0.0551736	0.813075	0.0417476	0.808611	0.0568344	1	0.0765987	0.703364	0.0613164	0.785455	-0.0350652	0.938419	-0.019783	0.999179	-1.62105	1.3e-90	0.117002	0.77622
C10orf105	NM_001164375	8.50363	-0.488851	NA	0.0671652	NA	1.28941	NA	0.733391	0.911806	-1.04292	NA	-0.609912	NA	0.33132	NA	-0.101686	0.999179	0.95609	0.191664	-0.553725	NA
C10orf120	NM_001010912	0.0432402	-1.02441	NA	-0.986899	NA	0	NA	0	NA	0	NA	0	NA	0	NA	0	NA	-0.993962	NA	0.88619	NA
C10orf126	NM_001278522	0	NA	NA	NA	NA	NA	NA	NA	NA	NA	NA	NA	NA	NA	NA	NA	NA	NA	NA	NA	NA
C10orf142	NM_001258000	0.945968	-2.01322	NA	-1.97572	NA	0.971378	NA	0.933872	NA	-0.575706	NA	-0.688575	NA	0.540469	NA	0.653335	NA	1.42275	NA	1.43763	NA
C10orf143	NM_001355042	260.132	0.145953	0.593287	-0.0445998	0.923919	-0.0663819	0.82209	0.124171	0.988961	0.00741643	0.988944	-0.0988155	0.784733	0.133058	0.778664	0.23929	0.518351	-0.0862978	0.61574	-0.138187	0.845898
C10orf25	NM_001039380	82.3877	-0.161286	0.737851	-0.178663	0.771047	-0.0268117	0.963573	-0.00943484	1	-0.36685	0.321426	-0.263056	0.554561	-0.100158	0.9291	-0.203952	0.941504	0.230856	0.363604	-0.205319	0.857938
C10orf53	NM_182554	0.0856766	1.85993	NA	0	NA	-1.91285	NA	0	NA	0	NA	0	NA	0	NA	0	NA	-0.0325816	NA	-1.99847	NA
[truncated: 26,266 more rows]

## Sheet: Whole Blood RNAseq
All Detected Genes (CPM > 0.5 in at least 2 samples)
Gene symbol	Chromosome	Ensembl ID	Base Mean Control	Base Mean T21	Fold-change	Adjusted Fold-change	p-value	FDR q-value (BH)			Whole blood RNA-seq cohort demographics
POFUT2	chr21	ENSG00000186866.16	1306.9	1936.81	1.59467	1.59325	1.12793e-194	1.88805e-190			Characteristic	Control/D21, N = 961	T21, N = 3041	p-value2
VPS26C	chr21	ENSG00000157538.14	2579.36	3570.67	1.47346	1.47238	2.39195e-186	2.00194e-182			Age	28 (14, 39)	23 (15, 32)	0.025
SUMO3	chr21	ENSG00000184900.15	2401.95	3572.56	1.60385	1.60216	3.19889e-167	1.78487e-163			Sex			0.2
RCAN1	chr21	ENSG00000159200.18	431.52	633.412	1.57651	1.57454	1.04997e-134	4.39385e-131			Female	52 (54%)	141 (46%)
NDUFV3	chr21	ENSG00000160194.18	1281.74	1725.06	1.42374	1.42232	2.85001e-119	9.54125e-116			Male	44 (46%)	163 (54%)
DONSON	chr21	ENSG00000159147.18	240.365	357.98	1.60909	1.60639	7.58598e-107	2.11636e-103			1Median (IQR); n (%)
GART	chr21	ENSG00000159131.17	1658.44	2325.53	1.4981	1.49593	1.69734e-101	4.05883e-98			2Wilcoxon rank sum test; Fisher's exact test
PRMT2	chr21	ENSG00000160310.18	6798.07	9807.1	1.54129	1.53879	2.34969e-98	4.91643e-95
MRPS6	chr21	ENSG00000243927.6	1161.76	1715.29	1.59742	1.59454	7.66808e-98	1.42618e-94
IFNAR2	chr21	ENSG00000159110.19	3433.17	5072.11	1.58775	1.58472	3.08943e-91	5.05056e-88
AGPAT3	chr21	ENSG00000160216.20	3382.76	5039.11	1.60202	1.59887	3.31897e-91	5.05056e-88
YBEY	chr21	ENSG00000182362.14	267.881	495.333	2.05974	2.05301	4.33309e-91	6.04429e-88
EPHB6	chr7	ENSG00000106123.12	1197.43	746.396	0.569519	0.570936	4.81773e-91	6.20339e-88
UBE2G2	chr21	ENSG00000184787.19	3774.09	4903.57	1.3654	1.36388	1.36339e-89	1.63012e-86
SCARF1	chr17	ENSG00000074660.16	1410.02	3599.85	3.01648	3.00041	2.07368e-88	2.31409e-85
HMGN1	chr21	ENSG00000205581.11	4624.01	6526.18	1.50883	1.50624	2.46015e-87	2.46483e-84
AL512306.2	chr1	ENSG00000240219.1	255.05	153.215	0.542995	0.544561	2.50326e-87	2.46483e-84
CRYZL1	chr21	ENSG00000205758.12	613.853	863.902	1.50085	1.49828	5.61085e-86	5.21778e-83
CHAF1B	chr21	ENSG00000159259.8	107.871	178.689	1.82275	1.81759	1.23715e-85	1.08993e-82
MCM3AP	chr21	ENSG00000160294.11	3744.33	5073.23	1.43427	1.43215	1.85434e-84	1.55199e-81
VSIG2	chr11	ENSG00000019102.12	35.1788	86.0213	3.03318	3.01569	2.86825e-84	2.28627e-81
RWDD2B	chr21	ENSG00000156253.7	249.201	372.702	1.61982	1.61617	9.29693e-83	7.07369e-80
SETD4	chr21	ENSG00000185917.13	576.205	735.234	1.33667	1.33523	1.37272e-82	9.99042e-80
CFAP298	chr21	ENSG00000159079.19	437.835	619.263	1.51578	1.51299	1.95008e-82	1.3601e-79
CCT8	chr21	ENSG00000156261.13	4041.82	5569.41	1.46972	1.46725	4.91501e-82	3.2909e-79
PTTG1IP	chr21	ENSG00000183255.12	7321.1	11178.4	1.65152	1.64764	5.66832e-82	3.64931e-79
ATG9B	chr7	ENSG00000181652.19	337.397	175.362	0.453494	0.455444	5.49153e-80	3.40455e-77
MMP1	chr11	ENSG00000196611.5	3.90905	31.3863	13.8075	13.577	1.94378e-76	1.16203e-73
SON	chr21	ENSG00000159140.21	9630.51	13253.7	1.46968	1.467	1.57419e-75	9.08635e-73
PSMG1	chr21	ENSG00000183527.12	232.021	361.33	1.6889	1.68425	3.38145e-74	1.88673e-71
MEOX1	chr17	ENSG00000005102.14	73.6257	158.026	2.52956	2.51564	4.15531e-74	2.24373e-71
SLC37A1	chr21	ENSG00000160190.14	914.39	1209.88	1.39439	1.39229	4.84793e-74	2.53592e-71
PDXK	chr21	ENSG00000160209.19	3476.38	5125.82	1.58969	1.58586	1.24491e-72	6.31469e-70
HLCS	chr21	ENSG00000159267.14	402.529	606.872	1.63276	1.62847	1.29936e-72	6.39707e-70
GET1	chr21	ENSG00000182093.16	346.786	545.961	1.71553	1.7104	3.7011e-72	1.77008e-69
C21orf58	chr21	ENSG00000160298.17	206.742	312.851	1.63119	1.62689	5.16156e-72	2.39998e-69
AC010422.8	chr19	ENSG00000285589.1	661.156	880.673	1.40674	1.40447	3.31589e-71	1.50013e-68
AATBC	chr21	ENSG00000215458.8	812.041	1493.24	2.04271	2.03426	4.64769e-71	2.04731e-68
CPT1B	chr22	ENSG00000205560.12	363.691	608.033	1.84883	1.84221	8.21312e-71	3.52511e-68
DYRK1A	chr21	ENSG00000157540.21	3264.74	4323.22	1.3956	1.39337	7.0607e-70	2.95473e-67
BTG3	chr21	ENSG00000154640.14	153.578	246.021	1.75944	1.75345	1.84257e-66	7.52261e-64
LSS	chr21	ENSG00000160285.15	1444.13	2152.79	1.60676	1.60222	9.09001e-65	3.6228e-62
FAM207A	chr21	ENSG00000160256.13	532.121	776.252	1.57353	1.56932	7.23555e-64	2.81665e-61
CSTB	chr21	ENSG00000160213.7	3112.53	4918.35	1.72977	1.72386	6.91955e-63	2.63242e-60
CA1	chr8	ENSG00000133742.13	294.733	1571.01	8.77476	8.6246	8.93064e-62	3.322e-59
DUSP13	chr10	ENSG00000079393.20	15.6238	51.509	3.92636	3.88898	2.58468e-61	9.40544e-59
ADRA2A	chr10	ENSG00000150594.7	28.0121	89.5378	4.11673	4.07432	2.77462e-60	9.88179e-58
AC015813.1	chr17	ENSG00000264112.1	585.375	422.714	0.680395	0.681949	4.6316e-60	1.61517e-57
AL844908.1	chr21	ENSG00000272825.1	108.632	183.292	1.84805	1.84036	3.23606e-59	1.10548e-56
SAMSN1	chr21	ENSG00000155307.18	1088.82	1851.88	1.85538	1.8474	4.22428e-58	1.4142e-55
CELSR3	chr3	ENSG00000008300.17	157.055	85.5213	0.48784	0.490383	9.13946e-58	2.99972e-55
CHKB-CPT1B	chr22	ENSG00000254413.8	120.357	196.547	1.80298	1.79503	5.3296e-55	1.71562e-52
TMEM50B	chr21	ENSG00000142188.17	1533.08	2307.15	1.62306	1.61741	7.8737e-54	2.48675e-51
PFKL	chr21	ENSG00000141959.17	5422.54	7567.67	1.49087	1.48677	4.51436e-53	1.39937e-50
LANCL3	chrX	ENSG00000147036.11	39.599	73.5053	2.08937	2.07696	1.00812e-52	3.06817e-50
MSR1	chr8	ENSG00000038945.15	84.8419	228.011	3.1265	3.09614	3.01819e-52	9.02168e-50
SERPINE2	chr2	ENSG00000135919.13	183.974	86.5582	0.398413	0.40154	3.56734e-52	1.04761e-49
MIS18A	chr21	ENSG00000159055.4	173.121	240.146	1.47565	1.47161	3.54874e-51	1.02418e-48
PDGFRB	chr5	ENSG00000113721.14	79.8684	190.728	2.79115	2.7668	3.94956e-51	1.12054e-48
CERCAM	chr9	ENSG00000167123.19	95.7763	224.75	2.79069	2.76617	4.13087e-50	1.15244e-47
LINC01547	chr21	ENSG00000183250.12	50.9949	77.8853	1.65691	1.65038	6.53277e-50	1.79266e-47
XKRX	chrX	ENSG00000182489.9	70.1679	26.656	0.307854	0.311308	2.79391e-49	7.54312e-47
PTPRM	chr18	ENSG00000173482.16	121.582	218.493	2.03518	2.02242	7.33325e-49	1.94843e-46
ADM5	chr19	ENSG00000224420.3	50.8143	93.1096	2.07569	2.06235	3.11576e-48	8.14918e-46
CNTNAP3	chr9	ENSG00000106714.17	436.658	145.844	0.268565	0.271897	8.13342e-48	2.09454e-45
BCAM	chr19	ENSG00000187244.12	40.0591	152.745	5.89473	5.78466	9.76959e-48	2.47778e-45
USP25	chr21	ENSG00000155313.15	2179.92	3077.3	1.49929	1.49446	3.44038e-47	8.5953e-45
ABCC13	chr21	ENSG00000243064.8	73.795	240.074	4.60596	4.53681	3.87277e-47	9.53329e-45
TMEM158	chr3	ENSG00000249992.2	138.735	443.631	4.22225	4.1656	5.18168e-47	1.25705e-44
AP001062.1	chr21	ENSG00000184441.4	393.766	543.366	1.46883	1.46446	5.28127e-47	1.2629e-44
XK	chrX	ENSG00000047597.7	196.216	551.655	3.66495	3.61782	5.42976e-47	1.26749e-44
FAM83H	chr8	ENSG00000180921.7	209.591	282.564	1.42877	1.42497	5.45191e-47	1.26749e-44
ACACB	chr12	ENSG00000076555.15	514.194	362.41	0.658278	0.660511	7.80639e-47	1.76583e-44
SPACA9	chr9	ENSG00000165698.16	81.3498	125.999	1.6807	1.67318	7.75904e-47	1.76583e-44
MAMDC4	chr9	ENSG00000177943.14	168.818	254.327	1.62252	1.61586	2.38527e-46	5.32359e-44
GNG7	chr19	ENSG00000176533.13	1379.89	908.118	0.607296	0.609921	3.4448e-46	7.58717e-44
COL4A3	chr2	ENSG00000169031.20	57.2241	23.769	0.339982	0.343684	4.61864e-46	1.00404e-43
FAM71F2	chr7	ENSG00000205085.11	69.6713	40.9151	0.526621	0.529754	1.34289e-45	2.88188e-43
STX1B	chr16	ENSG00000099365.11	38.0988	21.3782	0.498572	0.501817	1.6237e-45	3.4404e-43
AMH	chr19	ENSG00000104899.8	23.0753	54.5104	2.74111	2.71532	2.07398e-45	4.33955e-43
TNNT3	chr11	ENSG00000130595.19	152.262	77.4583	0.45873	0.462071	3.15243e-45	6.51464e-43
IL10RB	chr21	ENSG00000243646.10	621.196	923.127	1.59889	1.5925	3.31497e-45	6.76698e-43
PIGP	chr21	ENSG00000185808.13	272.752	373.401	1.44765	1.44345	4.63505e-45	9.34773e-43
N4BP3	chr5	ENSG00000145911.6	599.551	371.397	0.56073	0.563839	6.22817e-45	1.24111e-42
NUAK1	chr12	ENSG00000074590.13	16.3963	54.8755	4.10779	4.04599	7.70395e-45	1.51713e-42
LRRC3	chr21	ENSG00000160233.8	89.8238	139.456	1.68017	1.67242	8.85897e-45	1.72431e-42
GRM2	chr3	ENSG00000164082.15	18.2167	37.5685	2.33341	2.31447	1.1941e-44	2.29747e-42
PRSS16	chr6	ENSG00000112812.16	14.3797	29.6064	2.41312	2.39225	1.60834e-44	3.05931e-42
AMY2B	chr1	ENSG00000240038.6	515.646	369.523	0.671863	0.67412	5.07783e-44	9.55032e-42
OXTR	chr3	ENSG00000180914.10	33.3797	84.6999	2.96815	2.9351	6.59008e-44	1.22568e-41
LINC01422	chr22	ENSG00000223704.2	113.849	64.4924	0.509675	0.512969	8.49507e-44	1.56263e-41
C21orf91	chr21	ENSG00000154642.11	1516.75	2337.03	1.66092	1.65326	9.66732e-44	1.75893e-41
NRG1	chr8	ENSG00000157168.20	151.235	343.372	2.71776	2.69111	1.0349e-43	1.86272e-41
TTC9	chr14	ENSG00000133985.3	1714.72	1074.96	0.568789	0.571877	1.41827e-43	2.52557e-41
KCNAB3	chr17	ENSG00000170049.9	130.215	182.091	1.48428	1.4794	1.80162e-43	3.17446e-41
CD248	chr11	ENSG00000174807.4	606.218	261.246	0.352418	0.356627	4.87203e-43	8.49509e-41
FCMR	chr1	ENSG00000162894.12	14263.9	10213.3	0.669646	0.672036	1.22449e-42	2.11307e-40
PCNT	chr21	ENSG00000160299.17	1502.94	2030.48	1.42979	1.42555	1.84752e-42	3.15568e-40
RHAG	chr6	ENSG00000112077.17	6.91702	21.8067	4.40713	4.33129	2.56008e-42	4.3286e-40
PKNOX1	chr21	ENSG00000160199.15	796.129	985.763	1.28824	1.28603	3.17858e-42	5.32063e-40
RRP1	chr21	ENSG00000160214.13	754.896	995.325	1.39481	1.39104	4.53071e-42	7.50887e-40
LINC00671	chr17	ENSG00000213373.7	93.9786	192.41	2.31736	2.29758	7.88411e-42	1.29385e-39
TRIM71	chr3	ENSG00000206557.6	9.7095	23.2192	2.94571	2.91013	1.0394e-41	1.68917e-39
KIAA0355	chr19	ENSG00000166398.13	1179.97	869.966	0.694974	0.697169	1.51576e-41	2.43964e-39
UBXN10	chr1	ENSG00000162543.6	83.9925	147.113	1.94505	1.93183	1.93501e-41	3.08477e-39
RASGEF1A	chr10	ENSG00000198915.11	222.421	332.472	1.61402	1.60676	2.31623e-41	3.65768e-39
SSBP2	chr5	ENSG00000145687.16	990.032	778.722	0.75081	0.752451	2.60474e-41	4.07483e-39
FOLR2	chr11	ENSG00000165457.14	116.519	205.842	1.9499	1.93692	2.76311e-41	4.28257e-39
GHRL	chr3	ENSG00000157017.16	201.868	334.231	1.81429	1.8034	3.67939e-41	5.6504e-39
ISL2	chr15	ENSG00000159556.10	147.768	73.4208	0.450052	0.453776	5.60204e-41	8.52478e-39
RAB11FIP5	chr2	ENSG00000135631.17	318.75	558.32	1.94031	1.92683	7.61047e-41	1.14767e-38
CFAP161	chr15	ENSG00000156206.14	37.9396	89.5088	2.85262	2.82067	8.49575e-41	1.26974e-38
RHOC	chr1	ENSG00000155366.16	1590.82	2401.94	1.64045	1.63258	1.30351e-40	1.93093e-38
OPN3	chr1	ENSG00000054277.14	773.017	581.088	0.711928	0.713993	1.96775e-40	2.88931e-38
CDHR3	chr7	ENSG00000128536.16	68.1951	35.6548	0.468075	0.471818	3.3491e-40	4.87484e-38
AC005394.2	chr19	ENSG00000283403.1	21.3336	57.3297	3.37717	3.3318	3.61731e-40	5.21984e-38
GLYCTK	chr3	ENSG00000168237.18	645.265	826.813	1.34389	1.34077	3.71115e-40	5.30948e-38
ALPK3	chr15	ENSG00000136383.6	44.8287	24.5733	0.485474	0.489265	6.40568e-40	9.08684e-38
TRAPPC10	chr21	ENSG00000160218.13	1931.27	2587.6	1.42546	1.421	7.50208e-40	1.05527e-37
LIPH	chr3	ENSG00000163898.10	16.7685	43.9852	3.14805	3.10701	7.87171e-40	1.09804e-37
CFAP410	chr21	ENSG00000160226.16	1214.37	1660.73	1.45893	1.45388	1.44955e-39	2.00529e-37
HBG1	chr11	ENSG00000213934.8	1094.19	5201.34	7.6171	7.39844	2.76317e-39	3.7912e-37
EVA1C	chr21	ENSG00000166979.13	130.761	192.698	1.58907	1.58164	6.48443e-39	8.82462e-37
FCRL2	chr1	ENSG00000132704.16	1269.62	591.116	0.396655	0.401028	7.34029e-39	9.90881e-37
LINC02019	chr3	ENSG00000273356.1	85.6479	58.3213	0.635853	0.63873	1.09741e-38	1.46956e-36
COL6A2	chr21	ENSG00000142173.16	1416.79	2676.3	2.09182	2.0748	2.05793e-38	2.73394e-36
ANKRD55	chr5	ENSG00000164512.18	251.084	137.505	0.481064	0.485153	2.33435e-38	3.07675e-36
LGALS3	chr14	ENSG00000131981.16	2325.03	4155.07	2.02245	2.00667	2.88466e-38	3.77237e-36
IL10RB-DT	chr21	ENSG00000223799.1	249.102	381.22	1.68943	1.68005	5.00879e-38	6.49939e-36
APOBEC3G	chr22	ENSG00000239713.9	2485.42	3478.18	1.48405	1.47836	8.34244e-38	1.07419e-35
VEPH1	chr3	ENSG00000197415.12	28.2341	64.4019	2.81784	2.78224	1.43622e-37	1.83518e-35
HLA-DOA	chr6	ENSG00000204252.14	2851.94	1866.88	0.601776	0.605111	1.88771e-37	2.39381e-35
CRELD1	chr3	ENSG00000163703.18	183.071	142.711	0.744389	0.746284	2.06555e-37	2.59965e-35
SOD1	chr21	ENSG00000142168.14	1767.29	2573.75	1.57765	1.57024	2.53354e-37	3.16485e-35
TPCN1	chr12	ENSG00000186815.12	1869.1	1490.48	0.763776	0.765444	3.65252e-37	4.52886e-35
BTG1	chr12	ENSG00000133639.6	22776.4	19059.1	0.809026	0.81019	4.46552e-37	5.46471e-35
VENTX	chr10	ENSG00000151650.8	459.43	715.16	1.67666	1.66742	4.47258e-37	5.46471e-35
ATP5PF	chr21	ENSG00000154723.12	463.213	796.973	1.90696	1.89335	5.91335e-37	7.17272e-35
CRIP2	chr14	ENSG00000182809.10	412.646	217.278	0.451784	0.456221	6.18082e-37	7.44322e-35
P2RX5	chr17	ENSG00000083454.22	1071.58	660.022	0.561881	0.565588	9.39328e-37	1.1231e-34
RRP1B	chr21	ENSG00000160208.13	1970.87	2539.01	1.35687	1.35311	9.62538e-37	1.14269e-34
TSPAN17	chr5	ENSG00000048140.18	1507.66	1889.81	1.30771	1.30486	9.91977e-37	1.16934e-34
CYYR1	chr21	ENSG00000166265.13	22.9562	47.3834	2.33888	2.31476	1.3031e-36	1.52535e-34
CNKSR2	chrX	ENSG00000149970.16	180.013	99.4013	0.490745	0.49507	1.43956e-36	1.67339e-34
HOXC4	chr12	ENSG00000198353.8	56.1546	105.281	2.12153	2.10261	1.52386e-36	1.75917e-34
MROH6	chr8	ENSG00000204839.9	340.948	561.223	1.79077	1.77893	2.24808e-36	2.57744e-34
AQP10	chr1	ENSG00000143595.13	125.033	280.671	2.738	2.705	2.4205e-36	2.75625e-34
IFNAR1	chr21	ENSG00000142166.13	5472.93	7919.38	1.55412	1.54681	2.44854e-36	2.76933e-34
P2RY12	chr3	ENSG00000169313.9	96.0822	170.919	2.00078	1.98449	2.49423e-36	2.80207e-34
HRK	chr12	ENSG00000135116.9	121.479	43.2556	0.288439	0.293195	2.77989e-36	3.10217e-34
AVIL	chr12	ENSG00000135407.10	566.469	336.135	0.538753	0.54265	5.2299e-36	5.79436e-34
TP73-AS1	chr1	ENSG00000227372.12	768.852	621.99	0.775025	0.776635	5.26162e-36	5.79436e-34
ATP5PO	chr21	ENSG00000241837.7	657.125	1060.93	1.76778	1.75643	5.48085e-36	5.99634e-34
TPST2	chr22	ENSG00000128294.16	3437.03	4342.45	1.32102	1.31789	8.40072e-36	9.13115e-34
AEBP1	chr7	ENSG00000106624.11	570.444	333.836	0.534808	0.538868	1.26517e-35	1.35239e-33
STOM	chr9	ENSG00000148175.13	2844.58	4272.67	1.60843	1.59987	1.27273e-35	1.35239e-33
AHSP	chr16	ENSG00000169877.10	412.626	1209.57	4.08914	4.01305	1.27406e-35	1.35239e-33
MCEMP1	chr19	ENSG00000183019.7	771.398	1730.73	2.5363	2.50712	1.27653e-35	1.35239e-33
FP565260.6	chr21	ENSG00000280433.1	286.421	406.5	1.53082	1.52389	1.36527e-35	1.43731e-33
CD200	chr3	ENSG00000091972.18	349.645	177.075	0.446671	0.45125	1.41519e-35	1.48055e-33
FOXO1	chr13	ENSG00000150907.10	1922.6	1495.62	0.74032	0.742403	2.09195e-35	2.17498e-33
MRPL39	chr21	ENSG00000154719.13	265.205	393.957	1.59348	1.5853	2.1688e-35	2.24095e-33
PMEPA1	chr20	ENSG00000124225.16	442.162	268.344	0.555251	0.559243	2.37229e-35	2.43618e-33
TNFRSF13C	chr22	ENSG00000159958.6	2533.29	1359.9	0.476811	0.481323	2.52892e-35	2.58119e-33
NRCAM	chr7	ENSG00000091129.21	301.1	110.775	0.265061	0.270029	2.69797e-35	2.73705e-33
C2CD2	chr21	ENSG00000157617.17	453.164	585.726	1.35813	1.35427	3.38108e-35	3.40939e-33
AJM1	chr9	ENSG00000232434.2	286.043	475.033	1.81077	1.79819	3.53679e-35	3.54505e-33
BACH2	chr6	ENSG00000112182.15	2153.79	1374.96	0.584875	0.588668	3.70996e-35	3.69649e-33
BATF	chr14	ENSG00000156127.8	405.143	600.356	1.59426	1.58608	4.24357e-35	4.19717e-33
MCM3AP-AS1	chr21	ENSG00000215424.10	196.891	281.258	1.53298	1.52584	4.26262e-35	4.19717e-33
TNF	chr6	ENSG00000232810.4	351.2	471.379	1.41465	1.40971	9.39866e-35	9.20024e-33
GYPB	chr4	ENSG00000250361.8	51.0397	159.584	4.80297	4.69367	9.58372e-35	9.32686e-33
NBEA	chr13	ENSG00000172915.18	89.663	51.8931	0.513592	0.517968	1.09581e-34	1.06027e-32
AXIN2	chr17	ENSG00000168646.13	406.158	254.084	0.569341	0.573269	1.74193e-34	1.66654e-32
LINC02295	chr14	ENSG00000258511.1	107.391	49.9592	0.403837	0.408773	1.74231e-34	1.66654e-32
SYPL1	chr7	ENSG00000008282.8	1959.17	1612.29	0.792896	0.794358	1.77276e-34	1.68604e-32
ETS2	chr21	ENSG00000157557.13	2067.39	3173.16	1.66138	1.6514	2.15364e-34	2.03671e-32
PPM1H	chr12	ENSG00000111110.12	104.922	66.1822	0.577382	0.581221	2.25508e-34	2.12067e-32
OSM	chr22	ENSG00000099985.4	246.078	459.508	2.0879	2.0682	2.51205e-34	2.34912e-32
BEND5	chr1	ENSG00000162373.13	144.94	87.313	0.547085	0.551316	4.48029e-34	4.16642e-32
LRRN3	chr7	ENSG00000173114.13	1788.78	757.477	0.335359	0.340816	5.02911e-34	4.65096e-32
AFF3	chr2	ENSG00000144218.19	1023.32	603.651	0.533218	0.53762	6.46529e-34	5.94629e-32
SLC9A3R2	chr16	ENSG00000065054.14	112.832	164.259	1.55568	1.54792	8.17291e-34	7.39493e-32
SNCA	chr4	ENSG00000145335.16	2483.35	6653.11	3.63336	3.56588	8.13796e-34	7.39493e-32
HBD	chr11	ENSG00000223609.11	16.1073	53.8532	4.8351	4.72315	8.15741e-34	7.39493e-32
AL591895.1	chr1	ENSG00000242861.1	405.614	301.139	0.702954	0.705586	9.17005e-34	8.25256e-32
CR2	chr1	ENSG00000117322.17	868.92	482.928	0.497331	0.502072	1.17691e-33	1.05349e-31
OSBP2	chr22	ENSG00000184792.16	886.122	2143.9	3.26966	3.2129	2.36238e-33	2.1034e-31
CDKN2C	chr1	ENSG00000123080.12	149.089	207.082	1.4716	1.46542	2.52428e-33	2.23566e-31
GCNA	chrX	ENSG00000147174.11	152.311	109.854	0.678638	0.681566	3.4018e-33	2.99698e-31
BCL11A	chr2	ENSG00000119866.22	1033.21	726.029	0.657262	0.660489	3.79442e-33	3.32538e-31
WDR4	chr21	ENSG00000160193.12	358.382	449.49	1.30649	1.30331	3.82044e-33	3.33075e-31
B3GAT1	chr11	ENSG00000109956.13	282.926	651.08	2.67569	2.64047	3.85263e-33	3.34141e-31
DOP1B	chr21	ENSG00000142197.12	1328.39	1696.04	1.34401	1.34011	5.17598e-33	4.46602e-31
SMIM5	chr17	ENSG00000204323.5	246.733	446.776	2.10643	2.08529	5.38656e-33	4.62388e-31
HVCN1	chr12	ENSG00000122986.13	4157.56	3114.54	0.713261	0.715804	5.98695e-33	5.11304e-31
PLOD2	chr3	ENSG00000152952.12	13.9731	33.1821	2.7677	2.72933	6.90166e-33	5.86431e-31
HEMGN	chr9	ENSG00000136929.13	291.494	739.617	3.1745	3.12362	8.04475e-33	6.80106e-31
APOBEC3H	chr22	ENSG00000100298.15	70.4497	124.063	1.92653	1.91035	9.04724e-33	7.61013e-31
AC107884.1	chr11	ENSG00000251364.7	243.365	147.795	0.550975	0.555246	9.50783e-33	7.95758e-31
BPGM	chr7	ENSG00000172331.12	727.48	1820.35	3.16714	3.11466	1.36141e-32	1.13377e-30
ITGB2-AS1	chr21	ENSG00000227039.6	3202.53	4663.03	1.57055	1.562	1.61133e-32	1.33525e-30
CBR1	chr21	ENSG00000159228.13	867.345	1182.2	1.44009	1.43425	1.76068e-32	1.45182e-30
NUMBL	chr19	ENSG00000105245.9	231.877	302.203	1.37138	1.36686	2.24785e-32	1.84445e-30
AC004865.2	chr1	ENSG00000239636.1	169.171	236.634	1.4833	1.47667	2.28912e-32	1.86915e-30
AC100861.1	chr8	ENSG00000246582.3	207.909	149.974	0.676503	0.679585	2.97095e-32	2.41411e-30
ZDHHC8	chr22	ENSG00000099904.15	1526.44	1296.29	0.822777	0.823933	3.12678e-32	2.52846e-30
ACOT7	chr1	ENSG00000097021.19	267.049	388.619	1.57032	1.56176	3.45523e-32	2.76733e-30
AL161785.1	chr9	ENSG00000224307.2	168.909	96.6796	0.51881	0.523382	3.45439e-32	2.76733e-30
ZSCAN18	chr19	ENSG00000121413.12	1102.35	814.954	0.693506	0.696415	3.51015e-32	2.79792e-30
PPARD	chr6	ENSG00000112033.14	1620.99	1382.03	0.826158	0.827279	3.7005e-32	2.93567e-30
NCAM1	chr11	ENSG00000149294.16	288.689	462.715	1.76167	1.74884	3.83109e-32	3.02494e-30
CXCR5	chr11	ENSG00000160683.5	1936.27	1261.71	0.598199	0.602246	3.91384e-32	3.07576e-30
CLEC10A	chr17	ENSG00000132514.13	552.613	883.09	1.73432	1.72221	4.22428e-32	3.30422e-30
IFI27	chr14	ENSG00000165949.12	131.789	836.14	7.10786	6.87684	4.28009e-32	3.3323e-30
IFNGR2	chr21	ENSG00000159128.14	7729.67	11153.4	1.54071	1.53274	5.62756e-32	4.3611e-30
COBLL1	chr2	ENSG00000082438.17	329.63	194.249	0.530857	0.535572	6.13415e-32	4.73178e-30
ERBB2	chr17	ENSG00000141736.13	457.625	747.842	1.77837	1.76499	6.74009e-32	5.17534e-30
FECH	chr18	ENSG00000066926.11	720.256	1506.53	2.46247	2.431	9.14561e-32	6.99034e-30
CACHD1	chr1	ENSG00000158966.16	163.705	74.2142	0.370975	0.376682	9.91706e-32	7.54553e-30
PATZ1	chr22	ENSG00000100105.18	1966.84	1680.15	0.828287	0.829404	1.09337e-31	8.28144e-30
OSBPL10	chr3	ENSG00000144645.14	553.496	303.95	0.487893	0.492913	1.18059e-31	8.90176e-30
C12orf75	chr12	ENSG00000235162.8	673.615	983.589	1.56562	1.55714	1.41656e-31	1.06331e-29
TRAPPC3L	chr6	ENSG00000173626.10	21.2353	44.0988	2.35178	2.3241	1.52255e-31	1.13777e-29
RIPOR3	chr20	ENSG00000042062.13	39.2658	77.4537	2.26395	2.23778	1.60141e-31	1.19138e-29
SERPINE1	chr7	ENSG00000106366.9	35.395	73.3325	2.38735	2.35757	1.8464e-31	1.36756e-29
CHMP7	chr8	ENSG00000147457.14	6006.78	4792.92	0.762654	0.764697	1.94317e-31	1.43289e-29
ITPKB	chr1	ENSG00000143772.9	6921.24	5911.76	0.827847	0.828982	2.55537e-31	1.87607e-29
PRAG1	chr8	ENSG00000275342.5	1290.45	914.458	0.659462	0.662929	3.01367e-31	2.20287e-29
ICAM5	chr19	ENSG00000105376.5	32.706	58.1402	1.97504	1.95657	3.04225e-31	2.21409e-29
CX3CR1	chr3	ENSG00000168329.13	5808.55	8939.93	1.65981	1.64903	3.61166e-31	2.61713e-29
[truncated: 16,510 more rows]

## Sheet: Gene Expression-DESeq2 dataset2
GeneID	baseMean	log2FoldChange	padj
[truncated: 28,265 more rows]

## Sheet: Gene Expression-DESeq2 dataset3
GeneID	baseMean	log2FoldChange	padj
[truncated: 28,265 more rows]
