# Supplementary material for: Mediator kinase inhibition suppresses hyperactive interferon signaling in Down syndrome
Source: bioRxiv preprint, doi:10.1101/2023.07.05.547813, version 4 (2024-11-20)
Supplement: Fig1_sourceData2 [file 547813_file03.xlsx]

## Sheet: Data Key & Explanation
	Data Key & Explanation
	Chemical Annotation Descriptions
PATHWAY SORTORDER	An internally-generated number intended for sorting compounds by biochemical SUPER PATHWAY and SUB PATHWAY
BIOCHEMICAL NAME	The name of the identified biochemical
Biochemical Name	Indicates a compound that has been confirmed based on an authentic chemical standard and we are highly confident in its identity. (Metabolomics Standards Initiative Tier 1 identification)
Biochemical Name*	Indicates a compound that has not been confirmed based on a standard, but we are confident in its identity. (Not Tier 1)
Biochemical Name**	Indicates a compound for which a standard is not available, but we are reasonably confident in its identity or the information provided. (Not Tier 1)
Biochemical Name (#) or [#]	Indicates a compound that is a structural isomer of another compound in the Metabolon spectral library. For example, a steroid that may be sulfated at one of several positions that are indistinguishable by the mass spectrometry data or a diacylglycerol for which more than one stereospecific molecule exists.
SUPER PATHWAY	The general biochemical class assigned to the identified biochemical (e.g. lipid, amino acid, carbohydrate, etc.) intended for sorting compounds by broad biochemical classes
SUB PATHWAY	A more specific biochemical class assigned to the identified biochemical (e.g. TCA cycle, monoacylglycerols, etc.) intended for grouping/sorting compounds by biochemical pathway/class
PLATFORM	The Metabolon untargeted metabolomics platform consists of four different methods (i.e. Pos Late, Pos Early, Polar, and Neg). This column indicates which method was used to report the values associated with the detected biochemical.
COMP ID	An internally-generated Metabolon compound identifier
KEGG	An alphanumeric compound identifier and link to compound information in the Kyoto Encyclopedia of Genes and Genomes (KEGG)
HMDB	An alphanumeric compound identifier and link to compound information maintained by the Human Metabolome Database (HMDB)
PUBCHEM	A unique numerical identifier assigned by the National Center for Biotechnology Information (NCBI) and searchable in the PubChem database
CHEM ID	Unique identifier for each biochemical. CHEM IDs are listed in the top row of the data tabs of the accompanying client data table (CDT) file.
CAS	A unique numerical identifier assigned by the Chemical Abstracts Service (CAS) to every chemical substance described in the open scientific literature
	Statistical Analysis/Descriptors
FOLD CHANGE	Indicates the ratio of the mean scaled intesity for a metabolite between two experimental groups.
0.55	Green: indicates significant difference (p≤0.05) between the groups shown, metabolite ratio of < 1.00
0.76	Light Green: narrowly missed statistical cutoff for significance 0.05<p<0.10, metabolite ratio of < 1.00
1.71	Red: indicates significant difference (p≤0.05) between the groups shown; metabolite ratio of ≥ 1.00
1.32	Light Red: narrowly missed statistical cutoff for significance 0.05<p<0.10, metabolite ratio of ≥ 1.00
1.2	Non-colored text and cell: mean values are not significantly different for that comparison
	Blue: indicates significant (p≤0.05) ANOVA effect.
	Light Blue: indicates 0.05<p<0.10 ANOVA effect
P-VALUE	p-values for each comparison is derived from the Natural Log-Transformed Data using the corresponding statistical analysis (for eg. t-Test, ANOVA, etc.)
Q-VALUE	Q-values for each comparison is derived from the Natural Log-Transformed Data using False Discovery Rate (FDR) method.
Mean Values	Represents the mean scaled intensity for a metabolite in a particular experimental group.
% FILL	Represents the total percent of samples in a experimental group a metabolite was detected.
© Metabolon, Inc. All rights reserved. The Metabolon name, logo and related trademarks and service marks, owned by Metabolon, Inc. are registered and/or used in the United States and many foreign countries. Any use, copying or reproduction of the trademarks, logos, information, images or designs contained in this document is strictly prohibited without the prior written permission of Metabolon, I…

## Sheet: Summary Statistics
Within-Genotype Comparisons	Anova Contrast	IFN vs Ctrl		CA vs Ctrl		IFN + CA vs IFN		IFN + CA vs CA		IFN + CA vs CA
		D21	T21	D21	T21	D21	T21	D21	T21	D21	T21
	Total biochemicals p≤0.05	153	110	105	72	111	29	140	13
	Biochemicals ↑ | ↓	52 | 101	47 | 63	60 | 45	41 | 31	52 | 59	13 | 16	17 | 123	3 | 10	34 | 89	39 | 68
	Total biochemicals 0.05<p<0.1	31	35	34	55	54	38	55	12
	Biochemicals ↑ | ↓	16 | 15	20 | 15	23 | 11	25 | 30	19 | 35	14 | 24	4 | 51	5 | 7	10 | 39	17 | 21
Cross-Genotype Comparisons	Anova Contrast	T21 vs D21
		Ctrl	IFN	CA	IFN + CA
	Total biochemicals p≤0.05	366	365	326	325
	Biochemicals ↑ | ↓	172 | 194	180 | 185	141 | 185	179 | 146
	Total biochemicals 0.05<p<0.1	44	45	55	44
	Biochemicals ↑ | ↓	24 | 20	24 | 21	31 | 24	22 | 22

## Sheet: Heatmap
										Fold of Change																																	Statistical Values
Heat map of statistically significant biochemicals profiled in this study. Red and green shaded cells indicate p≤0.05 (red indicates that the mean values are significantly higher for that comparison; green values significantly lower). Light red and light green shaded cells indicate 0.05<p<0.10 (light red indicates that the mean values trend higher for that comparison; light green values trend low…										Outliers Included																	No Outliers																Outliers Included
										2W ANOVA Main Effects			2W ANOVA Contrast														2W ANOVA Main Effects			2W ANOVA Contrast													2W ANOVA Main Effects						2W ANOVA Contrast
										Genotype	Treatment	Genotype : Treatment	D21_CA_V	D21_V_IFN	T21_V_V	D21_CA_IFN	T21_CA_V	D21_CA_IFN	T21_V_IFN	T21_CA_IFN	T21_CA_V	T21_V_IFN	T21_CA_IFN	T21_CA_IFN	D21_CA_IFN	T21_CA_IFN	Genotype	Treatment	Genotype : Treatment	D21_CA_V	D21_V_IFN	T21_V_V	D21_CA_IFN	T21_CA_V	D21_CA_IFN	T21_V_IFN	T21_CA_IFN	T21_CA_V	T21_V_IFN	T21_CA_IFN	T21_CA_IFN		Genotype		Treatment		Genotype : Treatment		D21_CA_V
																																																	D21_V_V
Pathway Sort Order	Super Pathway	Sub Pathway	Biochemical Name	Platform	Comp ID	KEGG	HMDB	PUBCHEM	X				D21_V_V	D21_V_V	D21_V_V	D21_CA_V	D21_CA_V	D21_V_IFN	D21_V_IFN	D21_CA_IFN	T21_V_V	T21_V_V	T21_CA_V	T21_V_IFN	D21_V_V	T21_V_V				D21_V_V	D21_V_V	D21_V_V	D21_CA_V	D21_CA_V	D21_V_IFN	D21_V_IFN	D21_CA_IFN	T21_V_V	T21_V_V	T21_CA_V	T21_V_IFN	X	p-value	q-value	p-value	q-value	p-value	q-value	p-value
1	Amino Acid	Glycine, Serine and Threonine Metabolism	glycine	LC/MS pos early	58	C00037	HMDB0000123	750					1.14	1.05	1.13	0.81	1.04	0.88	1.13	1.24	1.06	1.04	0.95	0.97	0.92	1.01				1.14	1.05	1.19	0.81	1.1	0.88	1.21	1.24	1.06	1.06	0.91	0.9		0.0156	0.005	0.2474	0.1625	0.5566	0.6641	0.148
2			N-acetylglycine	LC/MS pos early	27710		HMDB0000532	10972					0.94	1.03	1	0.88	1.15	0.81	0.93	1.29	1.08	0.95	0.99	1.12	0.83	1.07				0.94	1.03	1.04	0.88	1.19	0.81	0.99	1.29	1.08	0.98	0.96	1.05		0.2691	0.0698	0.8182	0.3262	0.2686	0.5031	0.6588
6			dimethylglycine	LC/MS pos early	5086	C03626	HMDB0000092	673					1.07	1.04	1.16	0.91	0.86	0.93	0.99	0.85	0.8	0.89	0.9	0.8	0.97	0.71				1.07	1.04	1.26	0.91	0.91	0.93	1.05	0.85	0.77	0.87	0.85	0.76		0.5166	0.1242	0.2251	0.1577	0.347	0.5629	0.5173
7			betaine	LC/MS pos early	3141	C00719	HMDB0000043	247					1.03	1	1.06	0.91	1.03	0.93	1.1	1.13	1	1.04	0.99	0.96	0.93	0.99				1.03	1	1.12	0.91	1.1	0.93	1.18	1.13	1.01	1.05	0.93	0.9		0.1092	0.031	0.8119	0.3254	0.8205	0.7184	0.7074
10			serine	LC/MS pos early	1648	C00065	HMDB0000187	5951					1.16	1.11	0.77	0.92	0.77	0.97	0.74	0.91	1.16	1.06	1.1	1.2	1.07	1.27				1.16	1.11	0.79	0.92	0.8	0.97	0.8	0.91	1.18	1.13	1.05	1.1		0.0002	8.3368e-05	0.2293	0.1577	0.5436	0.6622	0.1836
11			N-acetylserine	LC/MS pos early	37076		HMDB0002931	65249					1.27	1.03	0.77	0.78	0.65	0.96	0.8	0.8	1.07	1.08	0.96	0.95	0.99	1.03				1.27	1.03	0.81	0.78	0.69	0.96	0.86	0.8	1.07	1.1	0.91	0.89		3.0525e-08	2.5084e-08	0.0481	0.0685	0.2169	0.4642	0.0063
17			threonine	LC/MS pos early	1284	C00188	HMDB0000167	6288					1.11	1.11	0.79	0.93	0.79	0.94	0.76	0.86	1.12	1.07	1.01	1.05	1.04	1.13				1.11	1.11	0.82	0.93	0.84	0.94	0.82	0.86	1.14	1.11	0.96	0.98		3.0912e-05	1.5545e-05	0.4369	0.2256	0.81	0.7184	0.2593
18			N-acetylthreonine	LC/MS neg	33939		HMDB0062557	152204					1.18	0.9	0.73	0.83	0.69	1.08	0.81	0.82	1.11	0.99	0.98	1.1	0.97	1.09				1.18	0.9	0.76	0.83	0.73	1.08	0.87	0.82	1.13	1.02	0.93	1.03		1.9962e-07	1.4617e-07	0.0296	0.0471	0.4465	0.6256	0.0779
19			allo-threonine	LC/MS polar	15142	C05519	HMDB0004041	99289					1.03	1.17	1.08	0.77	0.58	0.68	0.68	0.61	0.55	0.74	0.81	0.61	0.8	0.45				1.03	1.17	1.08	0.77	0.65	0.68	0.77	0.61	0.62	0.83	0.72	0.54		0.2703	0.0699	0.3154	0.1893	0.8262	0.7184	0.7802
29		Alanine and Aspartate Metabolism	alanine	LC/MS pos early	1126	C00041	HMDB0000161	5950					1.16	1.12	0.87	0.9	0.83	0.93	0.84	0.86	1.12	1.08	0.92	0.95	1.04	1.03				1.16	1.12	0.91	0.9	0.87	0.93	0.9	0.86	1.12	1.11	0.88	0.88		0.0012	0.0005	0.2414	0.1604	0.979	0.7469	0.1205
31			N-acetylalanine	LC/MS neg	1585	C02847	HMDB0000766	88064					1.08	1.11	0.73	0.94	0.76	0.91	0.79	0.81	1.13	1.21	1	0.93	1.01	1.13				1.08	1.11	0.76	0.94	0.8	0.91	0.85	0.81	1.14	1.24	0.95	0.87		3.9183e-07	2.6605e-07	0.1526	0.128	0.7683	0.718	0.368
36			aspartate	LC/MS pos early	443	C00049	HMDB0000191	5960					1.05	1.12	0.96	0.98	1.04	0.92	0.99	0.99	1.15	1.16	0.94	0.92	1.04	1.07				1.05	1.12	1	0.98	1.11	0.92	1.06	0.99	1.17	1.2	0.88	0.86		0.8641	0.1941	0.2281	0.1577	0.9526	0.7395	0.5227
37			N-acetylaspartate (NAA)	LC/MS polar	22185	C01042	HMDB0000812	65065					1.18	0.82	0.4	0.79	0.39	1.14	0.44	0.41	1.17	0.9	0.83	1.08	0.94	0.97				1.18	0.82	0.42	0.79	0.42	1.14	0.47	0.41	1.18	0.91	0.78	1.01		0	0	0.0002	0.0009	0.8088	0.7184	0.0674
40			asparagine	LC/MS pos early	512	C00152	HMDB0000168	6267					1.05	1.11	0.83	0.95	0.85	0.9	0.84	0.82	1.07	1.11	0.93	0.89	1	0.99				1.05	1.11	0.87	0.95	0.9	0.9	0.9	0.82	1.08	1.13	0.87	0.83		0.0002	0.0001	0.3375	0.1956	1	0.7547	0.5433
42			N-acetylasparagine	LC/MS pos early	33942		HMDB0006028	99715					1.49	1.06	0.83	0.74	0.57	1.04	0.8	0.74	1.02	1.02	0.96	0.96	1.11	0.98				1.49	1.06	0.89	0.74	0.6	1.04	0.85	0.74	1.01	1.02	0.91	0.9		8.2644e-08	6.4428e-08	0.0163	0.0317	0.0407	0.2135	0.0002
46		Glutamate Metabolism	glutamate	LC/MS pos early	57	C00025 C00217	HMDB0000148	33032					1.02	1.03	0.89	0.93	0.91	0.92	0.9	0.94	1.03	1.05	0.97	0.95	0.95	1				1.02	1.03	0.94	0.93	0.96	0.92	0.97	0.94	1.05	1.07	0.91	0.89		0.0248	0.0077	0.7239	0.3053	0.9457	0.7395	0.7945
47			glutamine	LC/MS pos early	53	C00064	HMDB0000641	5961					1	1.09	0.7	0.95	0.7	0.87	0.67	0.72	0.99	1.04	0.97	0.92	0.95	0.96				1	1.09	0.74	0.95	0.74	0.87	0.72	0.72	1	1.06	0.92	0.86		2.5723e-10	2.9154e-10	0.4189	0.2212	0.9315	0.7369	0.9972
49			N-acetylglutamate	LC/MS pos early	15720	C00624	HMDB0001138	70914					1.13	0.95	1.04	0.83	0.97	0.99	1.12	1.11	1.05	1.01	0.95	0.99	0.94	1				1.13	0.95	1.1	0.83	1.03	0.99	1.2	1.11	1.05	1.03	0.9	0.92		0.2119	0.0559	0.1982	0.1455	0.5501	0.6622	0.1574
50			N-acetylglutamine	LC/MS pos early	33943	C02716	HMDB0006029	182230					1.18	1	0.88	0.76	0.77	0.9	0.9	0.98	1.04	1.03	0.98	0.99	0.91	1.02				1.18	1	0.92	0.76	0.81	0.9	0.96	0.98	1.04	1.04	0.93	0.92		0.0078	0.0027	0.1837	0.1402	0.2585	0.497	0.0718
53			4-hydroxyglutamate	LC/MS pos early	40499	C03079	HMDB0001344	439902					1.03	1.03	2.08	0.93	1.85	0.93	1.96	1.95	0.91	0.97	0.98	0.93	0.96	0.9				1.03	1.03	2.19	0.93	1.95	0.93	2.08	1.95	0.92	0.98	0.93	0.87		1e-14	2.2e-14	0.7803	0.3203	0.8755	0.7194	0.6964
56			glutamate, gamma-methyl ester	LC/MS pos early	33487		HMDB0061715	68662					0.68	0.62	0.66	1.08	0.83	1.17	0.51	0.64	0.85	0.48	0.83	1.47	0.73	0.71				0.68	0.62	0.72	1.08	0.93	1.17	0.55	0.64	0.87	0.47	0.74	1.37		0.0003	0.0001	0.0041	0.0115	0.501	0.6547	0.044
57			N-acetyl-aspartyl-glutamate (NAAG)	LC/MS pos early	35665	C12270	HMDB0001067	188803					1.12	0.87	0.37	0.79	0.38	1.01	0.5	0.45	1.13	1.17	0.94	0.91	0.88	1.07				1.12	0.87	0.4	0.79	0.39	1.01	0.54	0.45	1.11	1.18	0.91	0.85		0	0	0.1181	0.1135	0.0629	0.2613	0.2259
58			beta-citrylglutamate	LC/MS neg	54923	C20775		189741					0.98	1.1	0.52	0.98	0.56	0.88	0.49	0.57	1.07	1.04	0.99	1.02	0.96	1.06				0.98	1.1	0.54	0.98	0.6	0.88	0.53	0.57	1.08	1.06	0.93	0.95		0	0	0.7813	0.3203	0.5985	0.6746	0.9349
60			carboxyethyl-GABA	LC/MS pos early	40007		HMDB0002201	2572					1.14	0.91	1.12	0.76	0.99	0.94	1.08	1.23	1.01	0.88	0.94	1.08	0.86	0.95				1.14	0.91	1.22	0.76	1.05	0.94	1.15	1.23	0.98	0.87	0.89	1.01		0.1223	0.0343	0.0996	0.1024	0.5346	0.6622	0.2401
64			S-1-pyrroline-5-carboxylate	LC/MS pos early	42370	C04322	HMDB0001301	11966181					1.02	1.1	1.87	0.82	2.2	0.76	1.83	2.93	1.2	1.08	1.1	1.22	0.84	1.32				1.02	1.1	2	0.82	2.33	0.76	1.94	2.93	1.19	1.07	1.03	1.15		7e-15	1.7e-14	0.7024	0.2987	0.0383	0.2135	0.8645
72		Histidine Metabolism	histidine	LC/MS neg	59	C00135	HMDB0000177	6274					1.4	1.33	0.87	0.89	0.75	0.94	0.79	0.82	1.22	1.2	0.97	0.98	1.24	1.18				1.4	1.33	0.91	0.89	0.78	0.94	0.85	0.82	1.21	1.24	0.94	0.91		0.0008	0.0003	0.0101	0.0223	0.8139	0.7184	0.0054
73			1-methylhistidine	LC/MS pos early	30460	C01152	HMDB0000001	92105					1.21	1.4	0.98	0.81	0.8	0.7	0.97	0.88	0.98	1.38	0.89	0.63	0.98	0.87				1.21	1.4	1.1	0.81	0.79	0.7	1.01	0.88	0.87	1.29	0.9	0.6		0.4937	0.1203	0.1069	0.1065	0.9463	0.7395	0.3493
74			3-methylhistidine	LC/MS neg	15677	C01152	HMDB0000479	64969					1.07	1.12	0.91	0.98	0.77	0.94	0.82	0.76	0.91	1.01	0.96	0.87	1.05	0.88				1.07	1.12	0.96	0.98	0.81	0.94	0.88	0.76	0.9	1.02	0.92	0.82		4.1443e-05	2.0422e-05	0.533	0.2512	0.5862	0.6725	0.4263
75			N-acetylhistidine	LC/MS pos early	33946	C02997	HMDB0032055	75619					0.78	0.91	0.78	0.91	1	0.78	0.99	1.27	1.01	1.16	1.15	1	0.71	1.16				0.78	0.91	0.85	0.91	1.03	0.78	1.08	1.27	0.96	1.15	1.11	0.92		0.8388	0.1895	0.3477	0.1994	0.0415	0.2135	0.0589
80			trans-urocanate	LC/MS pos early	607	C00785	HMDB0000301	736715					0.91	0.63	1.14	1.12	1.03	1.62	12.56	0.66	0.82	6.91	0.71	0.08	1.02	0.58				0.91	0.63	1.28	1.12	1.01	1.62	14.56	0.66	0.72	7.16	0.73	0.07		0.1829	0.0488	0.6181	0.2735	0.1247	0.3568	0.9824
82			imidazole propionate	LC/MS pos early	40730		HMDB0002271	70630					0.78	0.93	0.8	0.89	0.89	0.74	0.89	1.01	0.87	1.03	1.01	0.85	0.69	0.88				0.78	0.93	0.86	0.89	0.95	0.74	0.96	1.01	0.86	1.03	0.95	0.79		0.0371	0.0112	0.0061	0.0156	0.4512	0.6256	0.0347
83			formiminoglutamate	LC/MS pos early	43493	C00439	HMDB0000854	439233					0.93	0.89	1.82	1.08	1.31	1.13	1.17	1.09	0.67	0.58	0.9	1.05	1.01	0.61				0.93	0.89	1.98	1.08	1.43	1.13	1.26	1.09	0.68	0.57	0.82	0.98		0.0027	0.001	0.0545	0.0727	0.248	0.4905	0.6635
85			imidazole lactate	LC/MS pos early	15716	C05568	HMDB0002320	793					1.01	0.91	0.78	0.72	0.72	0.79	0.9	1	0.93	1.06	1	0.88	0.73	0.93				1.01	0.91	0.84	0.72	0.74	0.79	0.98	1	0.89	1.07	0.97	0.81		0.0039	0.0014	0.0766	0.0879	0.2057	0.4531	0.9268
86			carnosine	LC/MS pos early	1768	C00386	HMDB0000033	439224					1.07	0.98	1.47	1.01	1.12	1.1	1.12	0.98	0.82	0.75	0.88	0.96	1.08	0.72				1.07	0.98	1.6	1.01	1.2	1.1	1.2	0.98	0.81	0.74	0.82	0.89		0.0439	0.0131	0.4474	0.2282	0.297	0.5261	0.5576
93			1-methyl-4-imidazoleacetate	LC/MS pos early	32350	C05828	HMDB0002820	75810					0.97	0.86	1.34	0.9	1.14	1.02	1.23	1.14	0.82	0.78	0.9	0.94	0.87	0.74				0.97	0.86	1.47	0.9	1.23	1.02	1.33	1.14	0.81	0.78	0.83	0.87		0.0134	0.0044	0.1451	0.1247	0.8418	0.7184	0.9367
94			1-methyl-5-imidazoleacetate	LC/MS pos early	62946		HMDB04988	6451814					0.91	0.97	1.06	0.94	0.98	0.88	0.88	1.02	0.84	0.8	0.98	1.02	0.85	0.82				0.91	0.97	1.15	0.94	1.03	0.88	0.93	1.02	0.82	0.79	0.92	0.96		0.6118	0.1452	0.1867	0.1402	0.5976	0.6746	0.4733
95			1-methyl-5-imidazolelactate	LC/MS pos early	64596								1.02	0.9	0.8	0.84	0.7	0.95	0.75	0.72	0.9	0.85	0.87	0.92	0.86	0.78				1.02	0.9	0.86	0.84	0.74	0.95	0.8	0.72	0.88	0.83	0.82	0.86		1.6635e-05	8.8804e-06	0.1682	0.1331	0.9574	0.7395	0.8097
98			1-ribosyl-imidazoleacetate*	LC/MS pos early	61868	C05131	HMDB0002331	440569					0.42	0.71	1.02	1.22	1.65	0.73	0.83	0.84	0.69	0.58	0.62	0.74	0.52	0.43				0.42	0.71	1.16	1.22	1.82	0.73	0.9	0.84	0.67	0.55	0.56	0.69		0.9087	0.2026	0.0015	0.0048	0.2279	0.4682	0.0019
99			4-imidazoleacetate	LC/MS pos early	32349	C02835	HMDB0002024	96215					1.04	1.03	0.92	0.76	0.82	0.77	0.85	1.04	0.93	0.95	0.96	0.94	0.79	0.9				1.04	1.03	1.02	0.76	0.85	0.77	0.88	1.04	0.87	0.89	0.93	0.91		0.1753	0.047	0.393	0.2134	0.8728	0.7194	0.8795
104			histidine methyl ester	LC/MS pos early	32493			92893					0.51	0.6	0.4	1.29	0.79	1.09	0.67	0.61	1	1	1	1	0.65	1				0.51	0.6	0.4	1.29	0.79	1.09	0.67	0.61	1	1	1	1		4.7997e-09	4.4477e-09	0.0068	0.0169	0.0068	0.0617	7.8362e-06
107		Lysine Metabolism	lysine	LC/MS pos early	1301	C00047 C00739	HMDB0003405	5962					1.16	1.02	0.72	0.85	0.7	0.96	0.71	0.85	1.13	1	1.02	1.15	0.98	1.16				1.16	1.02	0.74	0.85	0.73	0.96	0.77	0.85	1.15	1.05	0.98	1.06		2.5723e-06	1.516e-06	0.266	0.1695	0.5523	0.6622	0.1802
109			N6-acetyllysine	LC/MS neg	36752	C02727	HMDB0000206	92832					1.17	1.4	0.6	0.95	0.54	0.79	0.51	0.61	1.05	1.19	1.07	0.95	1.1	1.13				1.17	1.4	0.63	0.95	0.55	0.79	0.55	0.61	1.02	1.21	1.05	0.88		1.3291e-11	1.8651e-11	0.0495	0.0694	0.6326	0.6922	0.1969
116			N6-methyllysine	LC/MS pos early	62860	C02728	HMDB0002038	164795					0.93	1.01	0.8	0.95	0.66	0.87	0.57	0.58	0.77	0.72	0.83	0.89	0.89	0.65				0.93	1.01	0.86	0.95	0.7	0.87	0.61	0.58	0.75	0.72	0.79	0.84		1.2809e-08	1.1101e-08	0.0458	0.0661	0.3599	0.5766	0.623
118			N6,N6,N6-trimethyllysine	LC/MS pos early	1498	C03793	HMDB0001325	440120					1.06	1.09	0.99	1.02	0.82	0.99	0.77	0.75	0.88	0.85	0.93	0.97	1.08	0.82				1.06	1.09	1.07	1.02	0.87	0.99	0.82	0.75	0.86	0.84	0.88	0.9		0.0008	0.0003	0.915	0.3524	0.3305	0.552	0.5669
119			hydroxy-N6,N6,N6-trimethyllysine*	LC/MS pos early	62959								1.08	1.13	1.36	0.9	1.39	0.86	1.45	1.49	1.1	1.21	0.97	0.89	0.98	1.07				1.08	1.13	1.42	0.9	1.45	0.86	1.56	1.49	1.1	1.25	0.93	0.82		8.7078e-08	6.7174e-08	0.1905	0.1421	0.9271	0.7358	0.3707
121			5-hydroxylysine	LC/MS pos early	15685	C16741	HMDB0000450	3032849					1.09	1.03	0.72	0.92	0.6	0.98	0.59	0.52	0.92	0.85	0.8	0.86	1.01	0.73				1.09	1.03	0.76	0.92	0.67	0.98	0.64	0.52	0.96	0.86	0.72	0.81		1.1212e-07	8.4719e-08	0.5879	0.265	0.7165	0.7142	0.5602
122			5-(galactosylhydroxy)-lysine	LC/MS pos early	43582			66995551					1.43	0.84	1.98	1.02	1.04	1.74	2	0.9	0.75	0.84	0.88	0.78	1.45	0.66				1.43	0.84	2.23	1.02	1.12	1.74	2.08	0.9	0.71	0.78	0.82	0.75		0.0248	0.0077	0.757	0.3131	0.3003	0.5275	0.3004
123			fructosyllysine	LC/MS pos early	46227		HMDB0034879	9839580					1.01	0.97	1.14	1.08	0.97	1.12	0.8	0.64	0.86	0.68	0.71	0.9	1.09	0.61				1.01	0.97	1.26	1.08	1.04	1.12	0.86	0.64	0.84	0.66	0.66	0.83		0.0208	0.0066	0.2083	0.15	0.0869	0.2971	0.8894
125			2-aminoadipate	LC/MS polar	6146	C00956	HMDB0000510	92136					1.11	1.01	1.59	0.92	1.26	1.02	1.31	1.31	0.89	0.83	0.95	1.02	1.03	0.84				1.11	1.01	1.7	0.92	1.35	1.02	1.41	1.31	0.88	0.83	0.89	0.94		5.1695e-06	2.9072e-06	0.5627	0.259	0.4712	0.641	0.3108
133			pipecolate	LC/MS pos early	1444		HMDB0000070						0.94	1.09	1.1	0.97	1.04	0.84	1.14	1.02	0.9	1.14	0.95	0.75	0.92	0.85				0.94	1.09	1.17	0.97	1.09	0.84	1.22	1.02	0.87	1.14	0.91	0.7		0.1396	0.0384	0.0055	0.0144	0.8564	0.7184	0.5576
135			6-oxopiperidine-2-carboxylate	LC/MS neg	43231		HMDB0061705	3014237					0.95	0.91	1.14	0.9	1.04	0.93	1.09	1.14	0.87	0.88	0.98	0.97	0.85	0.85				0.95	0.91	1.22	0.9	1.13	0.93	1.17	1.14	0.87	0.88	0.91	0.91		0.117	0.033	0.2523	0.1644	0.8959	0.7269	0.6057
138			5-aminovalerate	LC/MS pos early	18319	C00431	HMDB0003355	138					0.97	0.98	0.81	0.87	0.84	0.86	0.84	0.96	1	1.01	0.99	0.98	0.84	0.99				0.97	0.98	0.86	0.87	0.89	0.86	0.89	0.96	1	1.01	0.93	0.92		0.0013	0.0005	0.4666	0.2332	0.4921	0.6514	0.7474
140			N,N,N-trimethyl-5-aminovalerate	LC/MS pos early	57687			14274897					1.08	0.98	0.9	0.9	0.89	0.99	0.92	0.94	1.07	1	0.94	1.02	0.97	1.01				1.08	0.98	0.95	0.9	0.95	0.99	0.98	0.94	1.07	1.01	0.89	0.95		0.0317	0.0097	0.4469	0.2282	0.9566	0.7395	0.3266
142		Phenylalanine Metabolism	phenylalanine	LC/MS pos early	64	C00079	HMDB0000159	6140					1.18	1.1	0.78	0.87	0.76	0.93	0.78	0.91	1.14	1.09	1.04	1.09	1.02	1.19				1.18	1.1	0.81	0.87	0.8	0.93	0.84	0.91	1.15	1.13	1	1.01		0.0002	7.825e-05	0.2466	0.1624	0.5371	0.6622	0.1162
144			N-acetylphenylalanine	LC/MS neg	33950	C03519	HMDB0000512	74839					0.9	0.99	0.63	0.95	0.64	0.86	0.6	0.71	0.9	0.95	1.06	1.01	0.85	0.96				0.9	0.99	0.67	0.95	0.67	0.86	0.65	0.71	0.89	0.96	1.01	0.94		2.6638e-07	1.869e-07	0.587	0.265	0.7572	0.717	0.39
155			phenylpyruvate	LC/MS neg	566	C00166	HMDB0000205	997					1.12	1.53	1.75	1.18	1.67	0.87	1	1.46	1.07	0.87	1.03	1.27	1.32	1.1				1.12	1.53	1.86	1.18	1.79	0.87	1.1	1.46	1.08	0.9	0.96	1.15		0.0005	0.0002	0.7745	0.3191	0.1978	0.4516	0.8917
156			phenyllactate (PLA)	LC/MS neg	22130	C05607	HMDB0000779 HMDB0000563	3848					0.94	0.48	0.37	0.46	0.41	0.9	0.7	0.81	1.02	0.89	0.91	1.04	0.43	0.93				0.94	0.48	0.38	0.46	0.42	0.9	0.77	0.81	1.04	0.96	0.87	0.94		3.6594e-09	3.5241e-09	3.0388e-05	0.0002	0.0073	0.0617	0.6132
167		Tyrosine Metabolism	tyrosine	LC/MS pos early	1299	C00082	HMDB0000158	6057					1.11	1.11	0.77	0.98	0.82	0.98	0.78	0.94	1.19	1.13	1.11	1.17	1.08	1.33				1.11	1.11	0.79	0.98	0.87	0.98	0.84	0.94	1.21	1.18	1.06	1.09		0.0008	0.0003	0.1631	0.1315	0.5943	0.6736	0.3117
168			N-acetyltyrosine	LC/MS neg	32390		HMDB0000866	68310					0.74	0.77	1.41	1.17	1.35	1.13	1.5	1.01	0.71	0.82	0.88	0.76	0.87	0.62				0.74	0.77	1.46	1.17	1.46	1.13	1.63	1.01	0.74	0.86	0.81	0.7		0.0184	0.0059	0.2639	0.169	0.6738	0.7049	0.2726
180			4-hydroxyphenylpyruvate	LC/MS neg	1669	C01179	HMDB0000707	979					1.22	2.47	2.06	1.54	1.76	0.76	0.87	1.15	1.05	1.04	1	1.01	1.88	1.05				1.22	2.47	2.18	1.54	1.9	0.76	0.94	1.15	1.06	1.07	0.93	0.93		1.9207e-05	1.0071e-05	9.7308e-05	0.0005	0.0002	0.0043	0.1636
186			3-(4-hydroxyphenyl)lactate	LC/MS neg	32197	C03672	HMDB0000755	9378					0.93	0.76	0.59	0.73	0.62	0.9	0.79	0.8	0.98	1.03	0.94	0.9	0.69	0.93				0.93	0.76	0.61	0.73	0.66	0.9	0.85	0.8	1	1.06	0.89	0.84		3.664e-10	3.9504e-10	0.0053	0.0141	0.0345	0.2076	0.4806
195			phenol sulfate	LC/MS neg	32553	C02180	HMDB0060015	74426					0.99	0.93	1.49	1.01	1.21	1.06	1.21	1.1	0.8	0.76	0.92	0.97	0.99	0.74				0.99	0.93	1.62	1.01	1.31	1.06	1.29	1.1	0.79	0.74	0.85	0.91		0.0034	0.0012	0.3444	0.1982	0.6368	0.6922	0.9219
221			o-tyrosine	LC/MS pos early	43392		HMDB0006050	91482					1.34	1.2	1.01	1.04	1.12	1.15	0.96	0.86	1.47	1.14	0.8	1.03	1.39	1.17				1.34	1.2	1.09	1.04	1.15	1.15	1.02	0.86	1.4	1.12	0.78	0.97		0.9426	0.2084	0.1731	0.1353	0.7301	0.7153	0.1793
222			tyrosine methyl ester	LC/MS pos early	37451		HMDB0029217	76957					0.98	0.75	0.45	0.92	0.46	1.21	0.5	0.48	1.01	0.83	0.96	1.16	0.91	0.97				0.98	0.75	0.48	0.92	0.5	1.21	0.52	0.48	1.01	0.81	0.89	1.11		3e-15	8e-15	0.0333	0.0507	0.9505	0.7395	0.9144
232			N-formylphenylalanine	LC/MS neg	48433		HMDB0240317	7064571;759256					1.35	1.24	1.07	1.01	1.33	1.1	0.92	0.83	1.67	1.06	0.63	1	1.37	1.06				1.35	1.24	1.07	1.01	1.43	1.1	1	0.83	1.8	1.16	0.59	0.92		0.8207	0.1866	0.0333	0.0507	0.3919	0.59	0.0967
259		Tryptophan Metabolism	tryptophan	LC/MS pos early	54	C00078	HMDB0000929	6305					1.18	1.22	0.75	0.94	0.74	0.9	0.71	0.81	1.16	1.14	1.03	1.04	1.1	1.19				1.18	1.22	0.78	0.94	0.77	0.9	0.76	0.81	1.17	1.2	0.99	0.96		6.7576e-06	3.7431e-06	0.1641	0.1315	0.8039	0.7184	0.1423
260			N-acetyltryptophan	LC/MS neg	33959	C03137	HMDB0013713	439917;700653					1.06	0.97	2.73	1.26	1.44	1.37	1.22	0.8	0.56	0.43	0.7	0.9	1.34	0.39				1.06	0.97	3.13	1.26	1.56	1.37	1.3	0.8	0.53	0.41	0.65	0.84		0.077	0.0222	0.4635	0.2331	0.1327	0.3661	0.9069
266			C-glycosyltryptophan	LC/MS pos early	48782		HMDB0240296	10981970					1.1	0.95	1.6	0.85	1.4	0.98	1.56	1.47	0.96	0.93	0.89	0.92	0.93	0.85				1.1	0.95	1.7	0.85	1.48	0.98	1.66	1.47	0.95	0.92	0.84	0.87		4.6468e-10	4.9257e-10	0.2057	0.1487	0.7439	0.716	0.2956
268			oxindolylalanine	LC/MS pos early	64568			20977764					1.36	1.42	1	0.97	0.84	0.94	0.92	0.94	1.14	1.3	1.1	0.97	1.33	1.25				1.36	1.42	1.03	0.97	0.87	0.94	0.93	0.94	1.14	1.27	1.06	0.95		0.1453	0.0397	0.0008	0.0027	0.6663	0.7044	0.004
269			tryptophan betaine	LC/MS pos early	37097	C09213	HMDB0061115	442106					0.8	0.79	1.82	1.12	1.51	1.14	1.67	1.14	0.67	0.73	0.85	0.78	0.9	0.57				0.8	0.79	1.94	1.12	1.64	1.14	1.83	1.14	0.68	0.74	0.79	0.72		0.0004	0.0002	0.0966	0.1009	0.3374	0.5562	0.4109
272			kynurenine	LC/MS pos early	15140	C00328	HMDB0000684	161166					1.12	1.42	0.91	1.18	0.84	0.93	0.78	0.72	1.03	1.21	1.01	0.86	1.33	1.05				1.12	1.42	0.98	1.18	0.87	0.93	0.83	0.72	1	1.21	0.97	0.8		0.0004	0.0002	0.0066	0.0168	0.5771	0.6703	0.2994
277			kynurenate	LC/MS neg	1417	C01717	HMDB0000715	3845					0.97	0.89	1.98	1.11	1.26	1.21	1.31	0.97	0.62	0.59	0.86	0.9	1.08	0.53				0.97	0.89	2.2	1.11	1.37	1.21	1.41	0.97	0.61	0.57	0.78	0.83		0.007	0.0024	0.1079	0.107	0.1245	0.3568	0.8838
292			serotonin	LC/MS pos early	2342	C00780	HMDB0000259	5202					1.01	0.93	1.2	0.87	1.25	0.94	1.18	1.32	1.05	0.91	0.91	1.06	0.88	0.96				1.01	0.93	1.26	0.87	1.32	0.94	1.27	1.32	1.06	0.93	0.86	0.98		5.5536e-05	2.6917e-05	0.1438	0.1246	0.7523	0.716	0.8625
295			5-hydroxyindoleacetate	LC/MS neg	437	C05635	HMDB0000763	1826					0.85	0.81	1.43	0.96	1.23	1	1.22	1.26	0.73	0.69	0.98	1.03	0.81	0.72				0.85	0.81	1.56	0.96	1.29	1	1.31	1.26	0.7	0.68	0.93	0.96		0.001	0.0004	0.0208	0.0367	0.8568	0.7184	0.2772
303			indolelactate	LC/MS neg	18349	C02043	HMDB0000671	92904					0.97	0.75	0.68	0.71	0.61	0.91	0.78	0.86	0.87	0.85	0.99	1.01	0.68	0.86				0.97	0.75	0.72	0.71	0.63	0.91	0.84	0.86	0.85	0.88	0.96	0.93		8.3049e-07	5.3669e-07	0.0043	0.0118	0.2061	0.4531	0.8066
327			3-indoxyl sulfate	LC/MS neg	27672		HMDB0000682	10258					0.86	0.83	1.84	1.08	1.49	1.11	1.36	1.07	0.69	0.61	0.78	0.88	0.93	0.54				0.86	0.83	2.03	1.08	1.61	1.11	1.45	1.07	0.68	0.6	0.72	0.82		0.0001	5.2743e-05	0.0188	0.0341	0.2148	0.4642	0.3113
337		Leucine, Isoleucine and Valine Metabolism	leucine	LC/MS pos early	60	C00123	HMDB0000687	6106					1.07	1.1	0.89	0.94	0.87	0.92	0.81	0.94	1.04	1.01	1.03	1.06	1.01	1.07				1.07	1.1	0.92	0.94	0.91	0.92	0.88	0.94	1.05	1.04	0.98	0.99		0.0078	0.0027	0.8901	0.3446	0.696	0.7131	0.5024
341			N-acetylleucine	LC/MS neg	1587	C02710	HMDB0011756	70912					0.89	1.06	0.69	1.01	0.76	0.85	0.7	0.75	0.98	1.07	0.98	0.9	0.9	0.96				0.89	1.06	0.73	1.01	0.8	0.85	0.75	0.75	0.97	1.08	0.94	0.84		1.7315e-08	1.4833e-08	0.1338	0.1203	0.8046	0.7184	0.2245
348			4-methyl-2-oxopentanoate	LC/MS neg	22116	C00233	HMDB0000695	70					0.82	0.87	0.71	1.02	0.77	0.95	1.16	0.98	0.88	1.42	1.31	0.81	0.83	1.15				0.82	0.87	0.75	1.02	0.8	0.95	1.28	0.98	0.88	1.5	1.25	0.73		0.0599	0.0175	0.2634	0.169	0.296	0.5261	0.2172
352			alpha-hydroxyisocaproate	LC/MS neg	22132	C03264	HMDB0000665 HMDB0000624 HMDB00746	92779;83697;439960					1.41	1.33	1.54	0.98	0.67	1.04	1.17	0.89	0.62	1.01	1.29	0.79	1.39	0.8				1.41	1.33	1.58	0.98	0.73	1.04	1.17	0.89	0.65	0.98	1.2	0.79		0.741	0.1709	0.7574	0.3131	0.2671	0.5022	0.2587
358			isovalerylglycine	LC/MS neg	35107		HMDB00678	546304					0.84	0.94	1.28	1.13	1.35	1.02	1.08	0.89	0.89	0.79	0.75	0.84	0.95	0.66				0.84	0.94	1.39	1.13	1.43	1.02	1.16	0.89	0.87	0.78	0.7	0.78		0.1403	0.0386	0.2254	0.1577	0.2987	0.5265	0.2461
359			isovalerylcarnitine (C5)	LC/MS pos early	34407	C20826	HMDB0000688	169235					1.09	1.01	0.34	0.88	0.31	0.95	0.32	0.23	0.97	0.94	0.65	0.67	0.96	0.63				1.09	1.01	0.36	0.88	0.31	0.95	0.34	0.23	0.94	0.95	0.63	0.63		0	0	0.0221	0.0376	0.1827	0.427	0.511
368			beta-hydroxyisovalerate	LC/MS polar	12129		HMDB0000754	69362					0.98	0.93	0.91	0.86	0.83	0.92	0.92	0.9	0.9	0.94	0.94	0.9	0.85	0.84				0.98	0.93	0.97	0.86	0.87	0.92	0.99	0.9	0.89	0.95	0.89	0.83		0.0113	0.0038	0.1731	0.1353	0.8715	0.7194	0.9168
369			beta-hydroxyisovaleroylcarnitine	LC/MS pos early	35433								1.01	0.94	0.8	0.9	0.8	0.97	0.8	0.88	1	0.93	0.99	1.06	0.9	0.99				1.01	0.94	0.86	0.9	0.87	0.97	0.84	0.88	1.02	0.92	0.91	1.01		0.0007	0.0003	0.807	0.324	0.8681	0.7194	0.8818
372			3-methylglutaconate	LC/MS polar	57747		HMDB0000522	1551553					1.01	0.98	1.58	0.89	1.78	0.92	2.1	1.88	1.14	1.29	0.94	0.83	0.9	1.07				1.01	0.98	1.67	0.89	1.9	0.92	2.25	1.88	1.16	1.32	0.88	0.77		6e-15	1.5e-14	0.2286	0.1577	0.2292	0.4682	0.8515
390			isoleucine	LC/MS pos early	1125	C16424 C00407 C06418	HMDB0000172	6306					1.03	1.04	0.98	0.91	0.93	0.9	0.93	1.01	0.97	0.98	0.99	0.99	0.94	0.97				1.03	1.04	1.04	0.91	0.98	0.9	1	1.01	0.97	1	0.94	0.92		0.3656	0.0914	0.8041	0.3237	0.8532	0.7184	0.7441
392			N-acetylisoleucine	LC/MS neg	33967		HMDB0061684	306109					0.67	0.95	0.65	1.28	0.66	0.91	0.63	0.74	0.69	0.91	1.43	1.07	0.86	0.98				0.67	0.95	0.73	1.28	0.69	0.91	0.66	0.74	0.64	0.87	1.37	1.01		2.8465e-05	1.4462e-05	0.0126	0.0264	0.8084	0.7184	0.0366
399			3-methyl-2-oxovalerate	LC/MS neg	15676	C00671 C06008 C03465	HMDB0000491	440877;439286					0.73	1.13	0.87	1.02	1.85	0.66	0.63	0.83	1.54	0.81	0.46	0.87	0.75	0.71				0.73	1.13	0.94	1.02	2.11	0.66	0.68	0.83	1.64	0.82	0.4	0.8		0.4679	0.1151	0.6104	0.271	0.8478	0.7184	0.3978
402			2-methylbutyrylcarnitine (C5)	LC/MS pos early	45095		HMDB0000378	6426901					1.11	0.95	0.6	0.84	0.64	0.98	0.66	0.91	1.19	1.05	1.19	1.34	0.94	1.42				1.11	0.95	0.64	0.84	0.7	0.98	0.72	0.91	1.21	1.07	1.1	1.24		1.2817e-07	9.5375e-08	0.1387	0.1228	0.0551	0.2485	0.3662
404			2-methylbutyrylglycine	LC/MS neg	31928		HMDB0000339	193872					0.95	0.92	1.31	0.93	1.1	0.96	1.14	1.04	0.8	0.8	0.88	0.88	0.89	0.71				0.95	0.92	1.42	0.93	1.18	0.96	1.22	1.04	0.79	0.79	0.82	0.82		0.0529	0.0156	0.0918	0.0968	0.7059	0.7142	0.6843
405			tiglylcarnitine (C5:1-DC)	LC/MS pos early	35428		HMDB0002366	22833596					0.89	0.91	0.64	1.02	0.87	0.99	0.91	0.8	1.21	1.3	0.93	0.87	0.91	1.13				0.89	0.91	0.64	1.02	0.9	0.99	0.98	0.8	1.26	1.41	0.9	0.81		0.0006	0.0002	0.7399	0.3094	0.2898	0.5235	0.4181
415			methylsuccinate	LC/MS polar	15745		HMDB0001844	10349					0.93	0.84	1.28	0.82	1.01	0.91	1.2	1.22	0.74	0.79	0.99	0.92	0.76	0.72				0.93	0.84	1.38	0.82	1.07	0.91	1.3	1.22	0.72	0.79	0.93	0.85		0.0276	0.0085	0.0315	0.0491	0.6362	0.6922	0.6653
421			valine	LC/MS pos early	1649	C00183	HMDB0000883	6287					1.14	1.11	0.82	0.96	0.8	0.99	0.76	0.86	1.11	1.03	1.04	1.12	1.1	1.15				1.14	1.11	0.85	0.96	0.84	0.99	0.83	0.86	1.13	1.08	0.99	1.03		0.001	0.0004	0.5149	0.2456	0.8962	0.7269	0.2786
422			N-acetylvaline	LC/MS neg	1591		HMDB0011757	66789					1.04	1.1	0.82	0.93	0.86	0.88	0.88	0.93	1.09	1.18	1	0.92	0.96	1.09				1.04	1.1	0.85	0.93	0.91	0.88	0.95	0.93	1.1	1.22	0.95	0.86		0.002	0.0008	0.1981	0.1455	0.6921	0.7123	0.6554
428			3-methyl-2-oxobutyrate	LC/MS polar	44526	C00141	HMDB0000019	49					0.86	0.94	0.74	1.07	0.85	0.98	0.78	0.79	0.99	0.99	1	1	0.92	0.99				0.86	0.94	0.73	1.07	0.85	0.98	0.78	0.79	1	1	1	1		0.0012	0.0005	0.9329	0.3557	0.9484	0.7395	0.4101
429			alpha-hydroxyisovalerate	LC/MS polar	46537		HMDB0000407	99823					0.89	0.94	1.11	0.96	0.97	0.92	1.04	0.94	0.78	0.88	0.94	0.83	0.86	0.73				0.89	0.94	1.2	0.96	1.04	0.92	1.13	0.94	0.77	0.88	0.88	0.77		0.975	0.2134	0.0539	0.0723	0.8149	0.7184	0.3629
431			isobutyrylcarnitine (C4)	LC/MS pos early	33441		HMDB0000736	168379					1.4	0.69	1.27	0.64	0.75	1.28	1.43	1.23	0.83	0.79	1.04	1.1	0.89	0.86				1.4	0.69	1.39	0.64	0.81	1.28	1.56	1.23	0.82	0.78	0.96	1.01		0.1471	0.0401	0.0909	0.0968	0.1483	0.3854	0.0714
432			isobutyrylglycine	LC/MS neg	35437		HMDB0000730	10855600					1.17	1.24	1.23	0.69	0.9	0.66	0.97	1.52	0.86	0.97	1.17	1.03	0.81	1.01				1.17	1.24	1.33	0.69	0.94	0.66	1.02	1.52	0.82	0.95	1.13	0.97		0.2736	0.0705	0.4539	0.2296	0.2239	0.4682	0.3962
433			3-hydroxyisobutyrate	LC/MS polar	1549	C01188 C06001	HMDB0000023 HMDB0000336	11966314					0.98	0.99	0.89	0.94	0.79	0.93	0.96	0.82	0.87	1.07	0.97	0.79	0.92	0.84				0.98	0.99	0.94	0.94	0.84	0.93	1.04	0.82	0.87	1.1	0.92	0.73		0.0313	0.0096	0.4368	0.2256	0.8387	0.7184	0.8884
434			2,3-dihydroxy-2-methylbutyrate	LC/MS polar	57547		HMDB0029576	301941					0.88	0.88	1.61	0.93	1.78	0.93	1.75	1.88	0.97	0.96	0.98	1	0.82	0.96				0.88	0.88	1.73	0.93	1.9	0.93	1.86	1.88	0.97	0.95	0.92	0.93		1.067e-12	1.767e-12	0.5028	0.2417	0.747	0.716	0.2605
440		Methionine, Cysteine, SAM and Taurine Metabolism	methionine	LC/MS pos early	1302	C00073	HMDB0000696	6137					1.17	1.19	0.69	0.9	0.67	0.89	0.68	0.76	1.14	1.17	1.02	1	1.05	1.17				1.17	1.19	0.72	0.9	0.69	0.89	0.73	0.76	1.13	1.2	0.99	0.92		2.525e-08	2.1019e-08	0.139	0.1228	0.7522	0.716	0.138
441			N-acetylmethionine	LC/MS neg	1589	C02712	HMDB0011745	448580					1.13	1.19	0.66	0.97	0.66	0.92	0.65	0.7	1.13	1.17	1.02	0.98	1.1	1.15				1.13	1.19	0.69	0.97	0.7	0.92	0.7	0.7	1.16	1.21	0.96	0.92		1.7444e-10	2.0398e-10	0.1287	0.1178	0.942	0.7395	0.212
443			N-formylmethionine	LC/MS neg	2829	C03145	HMDB0001015	439750					0.99	1.11	0.96	1	1.02	0.88	1.02	1.02	1.05	1.18	1	0.89	0.99	1.05				0.99	1.11	1.01	1	1.09	0.88	1.09	1.02	1.07	1.2	0.94	0.83		0.9641	0.2114	0.1594	0.1307	0.9492	0.7395	0.9767
444			S-methylmethionine	LC/MS pos early	38127	C05319	HMDB0038670	458					0.93	1.11	0.95	1.09	0.7	0.92	0.61	0.59	0.68	0.72	0.93	0.89	1.02	0.64				0.93	1.11	1.04	1.09	0.74	0.92	0.66	0.59	0.67	0.71	0.87	0.82		1.5834e-06	9.7616e-07	0.1812	0.1396	0.1735	0.4092	0.6448
445			methionine sulfone	LC/MS pos early	44878		HMDB0062174	69961					0.98	1.11	0.93	0.95	0.91	0.85	0.87	0.84	0.96	1.03	0.88	0.82	0.94	0.84				0.98	1.11	1	0.95	0.96	0.85	0.93	0.84	0.95	1.03	0.83	0.77		0.0097	0.0033	0.0616	0.0773	0.8975	0.7269	0.9185
446			methionine sulfoxide	LC/MS pos early	18374	C02989	HMDB0002005	158980					1.02	1.02	0.9	0.89	0.92	0.89	0.82	1.11	1.05	0.93	1.08	1.22	0.91	1.14				1.02	1.02	0.93	0.89	0.95	0.89	0.88	1.11	1.04	0.96	1.05	1.14		0.2175	0.0572	0.8784	0.3428	0.341	0.5586	0.78
447			N-acetylmethionine sulfoxide	LC/MS pos early	45428			11902949					0.96	0.91	0.63	0.76	0.7	0.81	0.64	1.12	1.07	0.93	1.23	1.41	0.74	1.31				0.96	0.91	0.66	0.76	0.72	0.81	0.68	1.12	1.05	0.93	1.19	1.33		0.002	0.0007	0.8761	0.3424	0.0849	0.2968	0.981
451			S-adenosylmethionine (SAM)	LC/MS pos early	15915	C00019	HMDB0001185	34755					0.92	1.04	0.51	0.93	0.53	0.82	0.46	0.52	0.96	0.95	0.92	0.93	0.85	0.88				0.92	1.04	0.54	0.93	0.55	0.82	0.5	0.52	0.95	0.96	0.87	0.87		0	0	0.1625	0.1315	0.7669	0.718	0.4634
452			S-adenosylhomocysteine (SAH)	LC/MS neg	42382	C00021	HMDB0000939	439155					0.71	1.06	0.65	1.16	0.85	0.78	0.54	0.65	0.93	0.88	0.9	0.94	0.83	0.83				0.71	1.06	0.69	1.16	0.91	0.78	0.57	0.65	0.94	0.88	0.84	0.89		1.7596e-09	1.7518e-09	0.0098	0.0223	0.0321	0.2021	0.0016
454			2,3-dihydroxy-5-methylthio-4-pentenoate (DMTPA)*	LC/MS neg	62805		HMDB0240388						0.97	0.98	1.19	1	1.04	0.99	0.98	0.89	0.85	0.81	0.85	0.9	0.97	0.73				0.97	0.98	1.29	1	1.11	0.99	1.05	0.89	0.84	0.8	0.8	0.84		0.9172	0.2041	0.2553	0.1655	0.4849	0.6467	0.7898
455			2-hydroxy-4-(methylthio)butanoic acid	LC/MS polar	63739		HMDB0037115	11427					0.81	0.69	0.5	0.78	0.57	0.92	0.68	0.59	0.91	0.93	0.81	0.8	0.64	0.74				0.81	0.69	0.54	0.78	0.6	0.92	0.73	0.59	0.9	0.93	0.77	0.74		1.534e-12	2.43e-12	0.0004	0.0014	0.317	0.5379	0.084
456			homocysteine	LC/MS pos early	15128	C00155	HMDB0000742	778					1.05	0.88	0.82	0.58	0.81	0.7	1.21	1.32	1.03	1.3	0.95	0.76	0.61	0.98				1.05	0.88	0.85	0.58	0.83	0.7	1.31	1.32	1.03	1.35	0.92	0.7		0.6818	0.16	0.0208	0.0367	0.0585	0.2548	0.4093
459			cystathionine	LC/MS pos early	15705	C02291	HMDB0000099	439258					0.89	1.04	0.24	0.85	0.29	0.73	0.27	0.31	1.07	1.16	0.92	0.85	0.75	0.98				0.89	1.04	0.25	0.85	0.3	0.73	0.29	0.31	1.07	1.2	0.87	0.78		0	0	0.0129	0.0268	0.2368	0.4738	0.2633
461			cysteine	LC/MS pos early	1868	C00097	HMDB0000574	5862					0.61	0.59	1.04	0.78	1.8	0.81	2.41	2.43	1.05	1.36	1.05	0.82	0.48	1.11				0.61	0.59	1.08	0.78	1.87	0.81	2.59	2.43	1.06	1.41	1.01	0.76		2.3039e-08	1.9398e-08	0.3814	0.213	0.076	0.2868	0.1658
462			N-acetylcysteine	LC/MS pos early	1586	C06809	HMDB0001890	12035					0.88	0.91	1.71	0.94	1.68	0.91	1.71	1.87	0.87	0.91	1.04	0.99	0.83	0.91				0.88	0.91	1.82	0.94	1.81	0.91	1.82	1.87	0.88	0.91	0.97	0.93		3.92e-13	6.96e-13	0.2497	0.1631	0.8692	0.7194	0.3107
463			S-methylcysteine	LC/MS pos early	39592		HMDB0002108	88180;7058174;24417					1.53	1.92	0.9	0.74	0.68	0.59	1.06	1.06	1.15	2.24	1.15	0.59	1.12	1.32				1.53	1.92	1.02	0.74	0.63	0.59	1.11	1.06	0.95	2.08	1.23	0.56		0.5278	0.1267	0.0135	0.0278	0.5603	0.6654	0.0913
464			S-methylcysteine sulfoxide	LC/MS pos early	43378		HMDB0029432	82142					0.91	1.04	0.83	0.98	0.89	0.85	0.81	0.7	0.97	1.02	0.77	0.73	0.89	0.75				0.91	1.04	0.87	0.98	0.95	0.85	0.87	0.7	0.99	1.04	0.72	0.68		0.0003	0.0001	0.0222	0.0376	0.5469	0.6622	0.4033
474			cysteine sulfinic acid	LC/MS pos early	37443	C00606	HMDB0000996	109					1.23	1.15	3.01	0.79	2.76	0.85	3.24	4.12	1.13	1.24	1.18	1.08	0.98	1.33				1.23	1.15	3.23	0.79	2.86	0.85	3.47	4.12	1.09	1.24	1.14	1.01		0	0	0.3191	0.1902	0.3843	0.59	0.2638
476			hypotaurine	LC/MS pos early	590	C00519	HMDB0000965	107812					1.01	1	1.04	0.88	1.07	0.89	1.13	1.21	1.04	1.09	1	0.95	0.89	1.04				1.01	1	1.1	0.88	1.13	0.89	1.21	1.21	1.03	1.1	0.95	0.89		0.0264	0.0082	0.6206	0.2741	0.5256	0.6622	0.8817
477			taurine	LC/MS neg	2125	C00245	HMDB0000251	1123					1.02	1	1.08	0.89	1.06	0.92	1.14	1.3	1.01	1.06	1.09	1.04	0.91	1.1				1.02	1	1.14	0.89	1.13	0.92	1.22	1.3	1.01	1.07	1.03	0.97		0.0083	0.0028	0.9835	0.3656	0.3155	0.5375	0.7947
479			N-acetyltaurine	LC/MS neg	48187		HMDB0240253	159864					1.07	1.01	1.62	0.79	1.43	0.84	1.65	1.68	0.95	1.03	0.93	0.85	0.85	0.88				1.07	1.01	1.73	0.79	1.48	0.84	1.77	1.68	0.91	1.03	0.9	0.79		1.1173e-10	1.3494e-10	0.1212	0.1152	0.7013	0.7131	0.4926
487			3-sulfo-alanine	LC/MS polar	47089	C00506	HMDB0002757	72886					1.05	0.93	1.73	0.77	1.8	0.87	1.83	1.95	1.09	0.98	0.84	0.93	0.81	0.91				1.05	0.93	1.83	0.77	1.88	0.87	1.98	1.95	1.08	1.01	0.8	0.86		1.68e-13	3.21e-13	0.0502	0.07	0.8847	0.7234	0.5257
490		Urea cycle; Arginine and Proline Metabolism	arginine	LC/MS pos early	1638	C00062	HMDB0000517	6322					1.05	0.99	0.89	0.9	0.8	0.95	0.76	0.84	0.95	0.85	0.94	1.05	0.94	0.89				1.05	0.99	0.94	0.9	0.85	0.95	0.82	0.84	0.95	0.86	0.89	0.98		0.0002	9.0966e-05	0.3829	0.213	0.7077	0.7142	0.5953
491			argininosuccinate	LC/MS pos early	15497	C03406	HMDB0000052	60150382					1.31	1.41	0.63	0.78	0.52	0.72	0.64	0.67	1.08	1.42	1.01	0.76	1.02	1.09				1.31	1.41	0.69	0.78	0.52	0.72	0.68	0.67	0.97	1.39	1.02	0.72		2.1294e-05	1.1086e-05	0.0425	0.0624	0.7772	0.718	0.1263
492			urea	LC/MS pos early	1670	C00086	HMDB0000294	1176					0.91	1.02	1.83	1.09	1.4	0.97	1.38	1.13	0.69	0.77	0.88	0.8	0.98	0.61				0.91	1.02	2.02	1.09	1.49	0.97	1.48	1.13	0.67	0.74	0.82	0.74		0.0002	7.3182e-05	0.182	0.1396	0.3819	0.59	0.5557
494			ornithine	LC/MS pos early	1493	C00077	HMDB0000214	6262					1.24	0.99	0.85	0.93	0.6	1.16	0.72	0.53	0.88	0.84	0.82	0.86	1.15	0.72				1.24	0.99	0.92	0.93	0.64	1.16	0.78	0.53	0.86	0.85	0.77	0.79		3.5501e-08	2.8899e-08	0.3023	0.1841	0.1263	0.3586	0.0858
496			3-amino-2-piperidone	LC/MS pos early	62853		HMDB0000323	5200225					1.12	0.92	0.93	0.9	0.96	1.1	1.96	1	1.15	1.93	0.94	0.56	1.01	1.09				1.12	0.92	0.99	0.9	1	1.1	2.2	1	1.14	2.05	0.9	0.5		0.6821	0.16	0.7295	0.3063	0.4795	0.6445	0.523
498			2-oxoarginine*	LC/MS pos early	55072	C03771	HMDB0004225	558					1.19	0.91	0.74	0.8	0.51	1.05	0.63	0.53	0.82	0.78	0.85	0.89	0.96	0.7				1.19	0.91	0.79	0.8	0.54	1.05	0.68	0.53	0.81	0.79	0.8	0.83		1.2344e-11	1.7489e-11	0.0219	0.0376	0.1151	0.3455	0.1199
499			citrulline	LC/MS pos early	2132	C00327	HMDB0000904	9750					0.99	1.08	0.88	0.92	0.84	0.84	0.84	0.89	0.95	1.03	0.97	0.9	0.91	0.92				0.99	1.08	0.93	0.92	0.89	0.84	0.9	0.89	0.94	1.04	0.92	0.83		0.0022	0.0008	0.2484	0.1627	0.9228	0.7357	0.9692
502			proline	LC/MS pos early	1898	C00148 C000763	HMDB0000162 HMDB0003411	145742;614;8988					1.05	1.08	1.03	0.92	1.01	0.89	1.05	1.04	1.02	1.1	0.95	0.88	0.96	0.97				1.05	1.08	1.1	0.92	1.06	0.89	1.12	1.04	1.02	1.11	0.9	0.82		0.5312	0.1273	0.3388	0.1959	0.9817	0.7469	0.5615
505			dimethylarginine (SDMA + ADMA)	LC/MS pos early	36808	C21189 C03626	HMDB0003334 HMDB0001539	123831;169148					1.21	1	0.62	0.86	0.64	1.04	0.68	0.81	1.24	1.1	1.09	1.23	1.04	1.36				1.21	1	0.64	0.86	0.67	1.04	0.74	0.81	1.26	1.16	1.05	1.13		6.1635e-08	4.8305e-08	0.0515	0.0708	0.3888	0.59	0.1109
506			N-acetylarginine	LC/MS pos early	33953	C02562	HMDB0004620	67427					1.04	0.97	0.92	0.92	0.91	0.99	0.84	0.93	1.02	0.89	0.95	1.09	0.96	0.97				1.04	0.97	0.98	0.92	0.96	0.99	0.89	0.93	1.02	0.88	0.89	1.04		0.0369	0.0112	0.4861	0.2385	0.9025	0.7284	0.5635
515			N-delta-acetylornithine	LC/MS neg	43249	C00437	HMDB0003357	9920500					1.04	1	0.87	0.92	0.78	0.96	0.86	0.8	0.94	1	0.94	0.88	0.96	0.88				1.04	1	0.91	0.92	0.82	0.96	0.92	0.8	0.93	1.01	0.9	0.83		2.666e-05	1.3612e-05	0.4396	0.2265	0.7372	0.716	0.5918
520			trans-4-hydroxyproline	LC/MS pos early	32306	C01157	HMDB0000725	5810					1.06	1.12	0.86	0.95	0.85	0.9	0.85	0.79	1.05	1.12	0.89	0.83	1.01	0.93				1.06	1.12	0.91	0.95	0.9	0.9	0.91	0.79	1.05	1.12	0.84	0.78		0.0002	9.9887e-05	0.1514	0.128	0.9555	0.7395	0.5084
522			pro-hydroxy-pro	LC/MS pos early	35127		HMDB0006695	11902893					1.03	0.77	2.24	1.05	1.35	1.4	1.57	0.98	0.62	0.54	0.77	0.88	1.09	0.48				1.03	0.77	2.49	1.05	1.47	1.4	1.7	0.98	0.61	0.53	0.71	0.81		0.0014	0.0005	0.0526	0.0718	0.1471	0.3844	0.9728
525			N-methylproline	LC/MS pos early	37431		HMDB0094696	643474					0.93	1.08	1.23	1.02	1.23	0.88	0.94	0.93	0.94	0.82	0.77	0.87	0.95	0.72				0.93	1.08	1.29	1.02	1.28	0.88	1	0.93	0.93	0.84	0.74	0.82		0.2901	0.074	0.3023	0.1841	0.2493	0.4905	0.6799
526			N,N,N-trimethyl-alanylproline betaine (TMAP)	LC/MS pos early	62947		HMDB0240365						1.06	0.85	1.39	0.91	1.13	1.13	1.38	1.26	0.86	0.84	1.01	1.04	0.96	0.87				1.06	0.85	1.49	0.91	1.2	1.13	1.5	1.26	0.85	0.85	0.95	0.95		0.0003	0.0001	0.2104	0.1504	0.6349	0.6922	0.6376
528			N-monomethylarginine	LC/MS pos early	43586	C03884	HMDB0029416	132862					1.1	1.08	0.71	0.93	0.73	0.94	0.69	0.8	1.13	1.05	1.02	1.1	1.02	1.15				1.1	1.08	0.75	0.93	0.77	0.94	0.74	0.8	1.14	1.07	0.97	1.03		9.5738e-07	6.111e-07	0.4698	0.2343	0.7258	0.7142	0.3449
529			argininate*	LC/MS pos early	57461		HMDB0003148	160437					1.07	0.77	0.32	0.67	0.28	0.92	0.4	0.28	0.93	0.97	0.66	0.64	0.71	0.62				1.07	0.77	0.33	0.67	0.29	0.92	0.43	0.28	0.94	1	0.63	0.6		0	0	7.834e-05	0.0004	0.2168	0.4642	0.596
535		Creatine Metabolism	guanidinoacetate	LC/MS pos early	43802	C00581	HMDB0000128	763					2.01	1.04	0.83	0.75	0.58	1.45	0.84	0.7	1.4	1.05	0.91	1.21	1.51	1.27				2.01	1.04	0.89	0.75	0.6	1.45	0.9	0.7	1.34	1.05	0.88	1.13		9.5808e-07	6.111e-07	2.9398e-08	5.2686e-07	0.0744	0.2829	9.8556e-08
536			creatine	LC/MS pos early	27718	C00300	HMDB0000064	586					1.08	0.95	1.4	0.85	1.3	0.96	1.35	1.41	1	0.92	0.92	1	0.91	0.92				1.08	0.95	1.47	0.85	1.38	0.96	1.45	1.41	1.01	0.94	0.87	0.93		4.1316e-08	3.3266e-08	0.1785	0.1382	0.8829	0.7231	0.3864
537			creatinine	LC/MS pos early	513	C00791	HMDB0000562	588					1	0.96	1.07	0.92	0.96	0.95	0.97	0.98	0.9	0.88	0.93	0.95	0.91	0.84				1	0.96	1.14	0.92	1.02	0.95	1.04	0.98	0.89	0.88	0.87	0.89		0.7568	0.1737	0.3314	0.1943	0.9048	0.7284	0.9958
538			creatine phosphate	LC/MS polar	33951	C02305	HMDB0001511	587;9548602					1.09	0.46	1.4	0.51	1.18	1.19	2.67	3.39	0.92	0.89	1.45	1.51	0.55	1.34				1.09	0.46	1.51	0.51	1.26	1.19	2.76	3.39	0.91	0.84	1.35	1.46		1.0042e-06	6.3775e-07	0.0729	0.0862	0.0421	0.2135	0.4099
545		Polyamine Metabolism	putrescine	LC/MS pos early	1408	C00134	HMDB0001414	1045					0.67	1.2	0.84	1.19	1.35	0.67	0.71	0.95	1.08	1.01	0.84	0.89	0.8	0.9				0.67	1.2	0.87	1.19	1.45	0.67	0.76	0.95	1.11	1.04	0.78	0.83		0.2512	0.0655	0.0052	0.014	0.0027	0.0295	0.0009
546			N-acetylputrescine	LC/MS pos early	37496	C02714	HMDB0002064	122356					0.78	1.56	0.58	1.4	0.96	0.71	0.57	0.72	1.29	1.52	1.06	0.9	1.1	1.36				0.78	1.56	0.6	1.4	1.03	0.71	0.61	0.72	1.34	1.58	0.99	0.84		2.2285e-07	1.6017e-07	1.3209e-05	0.0001	0.0134	0.1049	0.06
553			spermidine	LC/MS pos early	485	C00315	HMDB0001257	1102					1.09	0.96	0.69	0.81	0.67	0.92	0.61	0.66	1.06	0.85	0.79	0.99	0.88	0.84				1.09	0.96	0.73	0.81	0.71	0.92	0.65	0.66	1.06	0.85	0.75	0.93		1.3093e-09	1.3396e-09	0.0228	0.0381	0.8611	0.7191	0.349
554			N('1)-acetylspermidine	LC/MS pos early	57689	C00612	HMDB0001276	496					1	1.06	3.75	1.13	2.8	1.07	2.72	2.87	0.75	0.76	1.15	1.13	1.13	0.86				1	1.06	4.12	1.13	2.96	1.07	2.94	2.87	0.72	0.75	1.09	1.04		0	1e-15	0.6669	0.289	0.6158	0.6895	0.9723
560			spermine	LC/MS pos early	603	C00750	HMDB0001256	1103					1.19	0.81	0.55	0.79	0.56	1.16	0.53	0.59	1.2	0.79	0.84	1.28	0.94	1.01				1.19	0.81	0.57	0.79	0.59	1.16	0.57	0.59	1.23	0.81	0.79	1.2		2.0602e-09	2.0372e-09	0.0076	0.0183	0.9715	0.7454	0.1654
564			5-methylthioadenosine (MTA)	LC/MS pos early	1419	C00170	HMDB0001173	439176					0.97	1.02	0.6	0.94	0.57	0.89	0.62	0.54	0.92	1.05	0.9	0.78	0.91	0.83				0.97	1.02	0.66	0.94	0.61	0.89	0.66	0.54	0.89	1.02	0.84	0.73		7.003e-12	1.0217e-11	0.2276	0.1577	0.9209	0.7353	0.8351
568			4-acetamidobutanoate	LC/MS polar	1558	C02946	HMDB0003681	18189					0.93	0.87	1.39	1.01	1.22	1.06	1.2	1.08	0.81	0.75	0.89	0.96	0.93	0.72				0.93	0.87	1.52	1.01	1.31	1.06	1.3	1.08	0.8	0.74	0.83	0.89		0.0052	0.0018	0.1048	0.1056	0.6482	0.6997	0.5648
570		Guanidino and Acetamido Metabolism	1-methylguanidine	LC/MS pos early	48114	C02294	HMDB0001522	10111					0.97	1.03	1.11	0.97	1.08	0.92	1.06	1.09	0.95	0.99	0.98	0.94	0.95	0.93				0.97	1.03	1.19	0.97	1.15	0.92	1.13	1.09	0.94	0.99	0.92	0.88		0.1518	0.0412	0.7872	0.3211	0.9837	0.7469	0.9299
571			4-guanidinobutanoate	LC/MS pos early	15681	C01035	HMDB0003464	500					1.05	1.02	0.96	0.95	0.84	0.98	0.84	0.82	0.92	0.89	0.93	0.96	1	0.85				1.05	1.02	1.03	0.95	0.89	0.98	0.91	0.82	0.9	0.89	0.87	0.89		0.0037	0.0013	0.7068	0.2996	0.6994	0.7131	0.549
574		Glutathione Metabolism	glutathione, reduced (GSH)	LC/MS pos early	2127	D00014 C00051	HMDB0000125	124886					1.24	1.25	0.59	0.73	0.6	0.72	0.79	0.77	1.27	1.69	0.93	0.7	0.9	1.18				1.24	1.25	0.63	0.73	0.61	0.72	0.83	0.77	1.19	1.64	0.92	0.67		0.0003	0.0001	0.0172	0.0326	0.5214	0.6591	0.1718
575			glutathione, oxidized (GSSG)	LC/MS pos early	27727	D00031 C00127	HMDB0003337	65359					1.24	1.31	1.95	0.95	1.64	0.9	1.5	1.72	1.04	1.01	0.99	1.03	1.18	1.04				1.24	1.31	2.1	0.95	1.72	0.9	1.62	1.72	1.02	1.01	0.95	0.96		4.046e-12	6.083e-12	0.1856	0.1402	0.3822	0.59	0.0403
581			cysteine-glutathione disulfide	LC/MS pos early	35159	R00900	HMDB0000656	3080690					0.21	0.23	0.84	0.52	5.03	0.46	8.44	11.62	1.23	2.31	1.19	0.64	0.11	1.47				0.21	0.23	0.89	0.52	5.11	0.46	8.93	11.62	1.18	2.31	1.17	0.6		4.05e-13	7.11e-13	0.0331	0.0507	0.0007	0.0118	0.0049
582			S-methylglutathione	LC/MS pos early	33944	C11347		115260					0.99	0.85	0.66	0.9	0.61	1.05	0.72	0.67	0.92	0.93	0.98	0.97	0.89	0.9				0.99	0.85	0.71	0.9	0.64	1.05	0.77	0.67	0.89	0.92	0.94	0.91		3.8503e-09	3.66e-09	0.4522	0.2292	0.7121	0.7142	0.9795
583			S-lactoylglutathione	LC/MS neg	15731	C03451	HMDB0001066	440018					2.37	2.92	0.9	1.57	0.39	1.28	0.13	0.17	1.04	0.41	0.69	1.73	3.72	0.72				2.37	2.92	0.92	1.57	0.42	1.28	0.14	0.17	1.07	0.44	0.66	1.59		0.0005	0.0002	0.0165	0.0319	0.0002	0.0043	0.0002
584			cysteinylglycine	LC/MS pos early	35637	C01419	HMDB0000078	439498					0.94	0.9	0.63	0.84	0.75	0.87	0.79	0.79	1.12	1.13	0.88	0.87	0.79	0.98				0.94	0.9	0.66	0.84	0.79	0.87	0.84	0.79	1.13	1.15	0.84	0.82		2.2861e-07	1.6351e-07	0.1413	0.1239	0.3459	0.5629	0.5732
587			5-oxoproline	LC/MS neg	1494	C01879 C02237	HMDB0000267	439685;7405					1.06	1.11	1.05	0.86	0.92	0.82	1.02	1.01	0.92	1.08	0.95	0.81	0.92	0.87				1.06	1.11	1.13	0.86	0.95	0.82	1.1	1.01	0.89	1.08	0.92	0.76		0.9439	0.2084	0.1041	0.1056	0.8211	0.7184	0.5264
590			2-hydroxybutyrate/2-hydroxyisobutyrate	LC/MS polar	52281	C21297 C05984	HMDB0000729 HMDB00008	4277439;440864					0.94	0.97	1.08	0.99	0.95	0.95	0.99	0.94	0.83	0.89	0.97	0.9	0.93	0.8				0.94	0.97	1.16	0.99	1.03	0.95	1.06	0.94	0.84	0.89	0.9	0.84		0.7618	0.1746	0.2465	0.1624	0.7546	0.716	0.6316
592			ophthalmate	LC/MS pos early	34592		HMDB0005765	7018721					1.03	1.19	0.17	0.99	0.16	0.86	0.22	0.17	0.98	1.53	1	0.65	1.02	0.99				1.03	1.19	0.18	0.99	0.17	0.86	0.23	0.17	0.98	1.52	0.95	0.61		0	0	0.0006	0.0023	0.1408	0.3815	0.7555
597			S-nitrosoglutathione (GSNO)	LC/MS pos early	47127		HMDB0004645	104858;7059524					0.97	1.02	1.82	0.76	1.55	0.72	1.4	1.77	0.83	0.79	0.87	0.92	0.74	0.72				0.97	1.02	2.01	0.76	1.71	0.72	1.58	1.77	0.83	0.8	0.79	0.81		0.0002	7.1846e-05	0.3374	0.1956	0.7951	0.7184	0.9708
598			S-(1,2-dicarboxyethyl)glutathione	LC/MS neg	63009			9802383					0.75	0.86	0.61	0.96	0.83	0.84	0.61	0.81	1.02	0.87	0.95	1.11	0.72	0.96				0.75	0.86	0.64	0.96	0.9	0.84	0.65	0.81	1.05	0.88	0.87	1.04		2.5556e-07	1.8017e-07	0.153	0.128	0.1333	0.3661	0.0194
599			4-hydroxy-nonenal-glutathione	LC/MS neg	48504		HMDB0240578	92970719					1.41	1.2	1.21	0.92	0.81	1.08	0.86	0.91	0.93	0.85	1.04	1.15	1.3	0.97				1.41	1.2	1.28	0.92	0.86	1.08	0.93	0.91	0.95	0.87	0.97	1.06		0.2743	0.0705	0.237	0.1599	0.0728	0.2809	0.0055
600			3'-dephospho-CoA-glutathione*	LC/MS neg	62807								1	3.11	1.71	2.01	2.71	0.65	1.1	1.38	1.58	1.99	1.02	0.81	2.01	1.62				1	3.11	1.83	2.01	3.06	0.65	1.19	1.38	1.67	2.02	0.91	0.75		2.197e-05	1.1398e-05	5.8366e-07	7.322e-06	0.0357	0.2105	0.7014
601			CoA-glutathione*	LC/MS neg	62804	C00920		46873828					1.22	1.12	0.82	0.86	0.52	0.93	0.57	0.62	0.78	0.79	1.02	1.01	1.05	0.79				1.22	1.12	0.89	0.86	0.55	0.93	0.61	0.62	0.76	0.77	0.97	0.95		2.2774e-09	2.2223e-09	0.7254	0.3054	0.0776	0.29	0.1012
648	Peptide	Gamma-glutamyl Amino Acid	gamma-glutamylalanine	LC/MS pos early	37063	C03738	HMDB0029142	440103					1.26	1.09	1.61	0.83	1.38	0.96	1.75	1.51	1.08	1.19	0.91	0.83	1.05	0.98				1.26	1.09	1.7	0.83	1.43	0.96	1.87	1.51	1.07	1.21	0.88	0.77		3.0117e-10	3.3873e-10	0.0897	0.0968	0.4995	0.6547	0.0254
649			gamma-glutamylcysteine	LC/MS pos early	1778	C00669	HMDB0001049	123938					0.99	1.07	1.13	0.89	1.12	0.82	1.4	1.29	0.98	1.33	1.03	0.76	0.88	1.01				0.99	1.07	1.2	0.89	1.15	0.82	1.51	1.29	0.96	1.36	1	0.7		0.0026	0.001	0.1085	0.107	0.7536	0.716	0.8922
650			gamma-glutamylglutamate	LC/MS pos early	36738	C05282	HMDB0011737	92865					1.06	1.02	1.53	0.86	1.36	0.89	1.7	1.59	0.94	1.14	1	0.83	0.91	0.94				1.06	1.02	1.61	0.86	1.4	0.89	1.84	1.59	0.92	1.17	0.97	0.77		4.6884e-11	6.1132e-11	0.2101	0.1504	0.4475	0.6256	0.5024
651			gamma-glutamylglutamine	LC/MS pos early	2730	C05283	HMDB0011738	150914					1.04	1.02	1.28	0.85	1.13	0.87	1.42	1.32	0.92	1.13	1	0.81	0.89	0.91				1.04	1.02	1.35	0.85	1.18	0.87	1.52	1.32	0.9	1.14	0.96	0.76		1.3341e-06	8.329e-07	0.0755	0.0879	0.31	0.5353	0.6002
652			gamma-glutamylglycine	LC/MS pos early	33949		HMDB0011667	100099					1.25	0.98	3.12	0.68	2.17	0.86	3.17	3.65	0.87	1	1.14	0.99	0.85	0.99				1.25	0.98	3.24	0.68	2.21	0.86	3.38	3.65	0.85	1.03	1.12	0.93		0	0	0.6464	0.2831	0.0631	0.2613	0.0809
653			gamma-glutamylhistidine	LC/MS pos early	18245		HMDB0029151	7017195					1.1	1.2	1.54	1.05	1.39	0.96	1.64	1.43	0.99	1.27	1.08	0.84	1.15	1.07				1.1	1.2	1.62	1.05	1.41	0.96	1.81	1.43	0.96	1.33	1.06	0.76		2.9667e-05	1.5019e-05	0.3721	0.2097	0.943	0.7395	0.5535
654			gamma-glutamylisoleucine*	LC/MS pos early	34456		HMDB0011170	22885096					0.95	1.12	0.65	0.99	0.63	0.85	0.58	0.61	0.92	0.99	0.96	0.89	0.94	0.88				0.95	1.12	0.68	0.99	0.65	0.85	0.63	0.61	0.91	1.04	0.93	0.81		1.0011e-08	8.7283e-09	0.5505	0.2562	0.9061	0.7284	0.7711
655			gamma-glutamylleucine	LC/MS pos early	18369		HMDB0011171	151023					0.97	1.2	0.87	1.04	0.92	0.84	0.79	0.9	1.01	1.09	1.02	0.95	1	1.04				0.97	1.2	0.91	1.04	0.93	0.84	0.86	0.9	0.98	1.13	1.01	0.88		0.0484	0.0144	0.5386	0.2531	0.838	0.7184	0.8048
656			gamma-glutamyl-alpha-lysine	LC/MS pos early	55015			65254					1.25	1.06	1.52	0.9	1.04	1.07	1.44	1.53	0.86	1	1.33	1.14	1.14	1.14				1.25	1.06	1.55	0.9	1.14	1.07	1.58	1.53	0.93	1.08	1.21	1.04		0.0039	0.0014	0.8855	0.3444	0.3095	0.5353	0.1861
657			gamma-glutamyl-epsilon-lysine	LC/MS pos early	33934		HMDB0003869	7015685					1.11	0.94	1.75	1.05	1.41	1.25	1.72	1.3	0.9	0.92	0.97	0.94	1.17	0.87				1.11	0.94	1.86	1.05	1.52	1.25	1.84	1.3	0.91	0.93	0.9	0.88		4.2838e-06	2.4465e-06	0.8563	0.336	0.458	0.6323	0.2836
658			gamma-glutamylmethionine	LC/MS pos early	44872		HMDB0029155	7009567					1.21	1.25	1.41	0.93	1.35	0.9	1.51	1.57	1.15	1.34	1.08	0.93	1.12	1.24				1.21	1.25	1.46	0.93	1.35	0.9	1.64	1.57	1.12	1.4	1.08	0.86		2.7367e-06	1.6045e-06	0.0749	0.0879	0.8781	0.7204	0.1536
659			gamma-glutamylphenylalanine	LC/MS neg	33422		HMDB0000594	111299					1.18	1.11	1.61	0.97	1.3	1.04	1.49	1.55	0.95	1.03	1.16	1.08	1.15	1.1				1.18	1.11	1.66	0.97	1.3	1.04	1.63	1.55	0.93	1.09	1.16	0.99		1.9348e-05	1.0109e-05	0.8552	0.336	0.8087	0.7184	0.3033
660			gamma-glutamylthreonine	LC/MS pos early	33364		HMDB0029159	76078708					1.03	1.12	0.54	0.97	0.55	0.89	0.57	0.57	1.05	1.19	1.01	0.89	1	1.06				1.03	1.12	0.57	0.97	0.56	0.89	0.62	0.57	1.01	1.22	0.99	0.82		2.253e-12	3.457e-12	0.3879	0.2134	0.9707	0.7454	0.7338
661			gamma-glutamyltryptophan	LC/MS neg	33947		HMDB0029160	3989307					1.23	1.09	0.58	1.04	0.45	1.18	0.48	0.41	0.97	0.9	0.93	1.01	1.28	0.9				1.23	1.09	0.61	1.04	0.49	1.18	0.51	0.41	0.98	0.92	0.87	0.93		0	1e-15	0.4797	0.2376	0.1623	0.4015	0.0744
662			gamma-glutamyltyrosine	LC/MS neg	2734		HMDB0011741	94340					1.28	1.27	1.87	1.06	1.45	1.06	1.67	1.57	1	1.14	1.14	1	1.35	1.14				1.28	1.27	1.95	1.06	1.47	1.06	1.83	1.57	0.96	1.19	1.13	0.91		5.663e-07	3.7927e-07	0.3925	0.2134	0.7923	0.7184	0.1704
663			gamma-glutamylvaline	LC/MS pos early	43829		HMDB0011172	7015683					0.82	0.79	0.83	0.97	0.82	1.02	0.88	0.92	0.81	0.83	1.09	1.06	0.8	0.88				0.82	0.79	0.86	0.97	0.85	1.02	0.97	0.92	0.81	0.88	1.05	0.96		0.1702	0.0458	0.5719	0.2614	0.9609	0.7406	0.3416
679		Dipeptide	alanylleucine	LC/MS pos early	37093		HMDB0028691	259583					0.93	0.68	0.68	0.97	0.73	1.34	1	0.75	1	1	1	1	0.91	1				0.93	0.68	0.68	0.97	0.73	1.34	1	0.75	1	1	1	1		0.007	0.0024	0.3984	0.2154	0.3984	0.59	0.4305
834			glycylisoleucine	LC/MS neg	36659		HMDB0028844	259613					1.15	1.3	0.2	0.94	0.27	0.83	0.24	0.34	1.56	1.55	1.17	1.17	1.08	1.82				1.15	1.3	0.2	0.94	0.28	0.83	0.25	0.34	1.59	1.61	1.15	1.13		0	0	0.0117	0.0251	0.1938	0.4484	0.3548
835			glycylleucine	LC/MS pos early	34398	C02155	HMDB0000759	92843					1.11	1.25	0.22	0.92	0.26	0.82	0.26	0.32	1.31	1.5	1.15	1.01	1.02	1.51				1.11	1.25	0.22	0.92	0.26	0.82	0.28	0.32	1.3	1.56	1.14	0.95		0	0	0.018	0.0335	0.3151	0.5375	0.3774
845			glycylvaline	LC/MS pos early	18357		HMDB0028854	2724807					1.15	1.27	0.26	0.93	0.3	0.84	0.32	0.36	1.35	1.58	1.1	0.94	1.07	1.48				1.15	1.27	0.26	0.93	0.3	0.84	0.34	0.36	1.33	1.65	1.08	0.87		0	0	0.0039	0.0112	0.4135	0.5968	0.2096
869			isoleucylglycine	LC/MS neg	40008		HMDB0028907	342532					0.91	1.11	0.24	0.98	0.29	0.8	0.21	0.31	1.12	0.99	1.06	1.19	0.89	1.18				0.91	1.11	0.24	0.98	0.3	0.8	0.23	0.31	1.14	1.03	1.01	1.12		0	0	0.9647	0.3607	0.2255	0.4682	0.5575
888			leucylglycine	LC/MS pos early	40045		HMDB0028929	79070					1	1.08	0.4	0.89	0.43	0.82	0.37	0.48	1.08	1.01	0.99	1.06	0.88	1.07				1	1.08	0.42	0.89	0.47	0.82	0.4	0.48	1.1	1.03	0.92	0.98		1e-15	2e-15	0.9426	0.3567	0.5028	0.6547	0.9982
937			phenylalanylalanine	LC/MS neg	41374		HMDB0028988	5488196					1.62	1.99	0.4	1.41	0.27	1.15	0.13	0.17	1.1	0.67	0.89	1.46	2.28	0.98				1.62	1.99	0.41	1.41	0.28	1.15	0.15	0.17	1.12	0.71	0.85	1.35		0	0	0.0042	0.0117	1.3635e-05	0.0006	0.0017
942			phenylalanylglycine	LC/MS pos early	41370		HMDB0028995	6992304					1.1	1.16	0.04	0.9	0.05	0.85	0.03	0.06	1.43	0.92	1.12	1.72	0.99	1.59				1.1	1.16	0.04	0.9	0.05	0.85	0.03	0.06	1.41	0.93	1.07	1.61		0	0	0.068	0.0826	0.018	0.1356	0.495
963			prolylglycine	LC/MS pos early	40703		HMDB0011178	6426709					1.2	1.41	0.39	1.01	0.46	0.86	0.4	0.5	1.41	1.42	1.1	1.09	1.21	1.55				1.2	1.41	0.39	1.01	0.47	0.86	0.43	0.5	1.42	1.54	1.08	1		6.4e-14	1.3e-13	0.0121	0.0257	0.5867	0.6725	0.2229
1002			threonylphenylalanine	LC/MS neg	31530		HMDB0029068	7010580					1.23	1.03	0.31	0.68	0.31	0.82	0.36	0.38	1.22	1.19	0.84	0.86	0.84	1.03				1.23	1.03	0.31	0.68	0.31	0.82	0.37	0.38	1.22	1.23	0.84	0.83		1e-15	2e-15	0.0914	0.0968	0.7547	0.716	0.166
1014			tryptophylglycine	LC/MS neg	43028		HMDB0029083	263471					1.03	1.13	0.15	0.83	0.14	0.76	0.1	0.22	1.02	0.74	1.25	1.73	0.86	1.28				1.03	1.13	0.13	0.83	0.13	0.76	0.1	0.22	1.03	0.86	1.36	1.63		0	0	0.9378	0.3565	0.171	0.4085	0.839
1050			valylglycine	LC/MS neg	40475		HMDB0029127	136487					1.03	1.2	0.14	1.03	0.14	0.89	0.13	0.21	1.04	1.17	1.55	1.38	1.07	1.61				1.03	1.2	0.14	1.03	0.13	0.89	0.15	0.21	0.99	1.24	1.59	1.26		0	0	0.5265	0.2488	0.6706	0.7044	0.8386
1063			leucylglutamine*	LC/MS pos early	48189		HMDB0028927	4305457					1.12	1.13	0.57	0.79	0.56	0.78	0.5	0.67	1.11	1	0.93	1.04	0.88	1.04				1.12	1.13	0.57	0.79	0.58	0.78	0.5	0.67	1.14	1	0.91	1.04		1.4906e-08	1.2843e-08	0.5491	0.2561	0.6694	0.7044	0.446
1207		Acetylated Peptides	phenylacetylglycine	LC/MS neg	33945	C05598	HMDB0000821	68144					0.93	0.92	1.23	0.92	1.08	0.93	1.08	1.03	0.81	0.8	0.88	0.88	0.85	0.71				0.93	0.92	1.33	0.92	1.15	0.93	1.16	1.03	0.8	0.8	0.82	0.82		0.1357	0.0377	0.0291	0.0468	0.7811	0.718	0.5137
1236		Modified Peptides	N,N-dimethyl-pro-pro	LC/MS pos early	64571								1.12	0.95	1.22	0.88	1.15	1.04	1.29	1.27	1.05	1.01	0.98	1.03	0.99	1.03				1.12	0.95	1.31	0.88	1.21	1.04	1.39	1.27	1.04	1.01	0.93	0.95		0.0001	5.5431e-05	0.3537	0.202	0.8006	0.7184	0.2098
1240	Carbohydrate	Glycolysis, Gluconeogenesis, and Pyruvate Metabolism	glucose	LC/MS polar	20488	C00031	HMDB0000122	5793					1.1	0.96	2.46	1.11	1.77	1.28	1.5	1.35	0.79	0.58	0.85	1.16	1.22	0.67				1.1	0.96	2.71	1.11	1.93	1.28	1.62	1.35	0.79	0.57	0.78	1.07		5.8069e-07	3.8715e-07	0.165	0.1315	0.253	0.492	0.5962
1241			glucose 6-phosphate	LC/MS polar	31260	C00092	HMDB0001401	5958					2.58	2.26	3.52	0.87	1.47	0.99	1.95	2.27	1.07	1.25	1.34	1.15	2.24	1.44				2.58	2.26	3.65	0.87	1.56	0.99	2.11	2.27	1.1	1.3	1.26	1.07		8.7088e-09	7.7299e-09	0.0004	0.0017	0.0196	0.1433	5.1311e-05
1247			fructose 1,6-diphosphate/glucose 1,6-diphosphate/myo-inositol diphosphates	LC/MS neg	46896	C05378 C00354 C01231	HMDB0003514 HMDB0001058	10404962;3934;90658350;124383956;4453;445557;718;82400					2.53	3.57	1.4	1.36	0.53	0.96	0.31	0.37	0.96	0.8	0.93	1.13	3.44	0.9				2.53	3.57	1.47	1.36	0.53	0.96	0.34	0.37	0.92	0.83	0.94	1.04		2.1177e-07	1.5371e-07	0.0001	0.0006	1.3724e-06	9.9881e-05	1.7416e-06
1249			dihydroxyacetone phosphate (DHAP)	LC/MS pos early	15522	C00111	HMDB0001473	668					1.91	2.19	1.45	1.08	0.75	0.95	0.64	0.71	1	0.96	1.02	1.05	2.07	1.02				1.91	2.19	1.48	1.08	0.77	0.95	0.69	0.71	0.99	1.02	1	0.98		0.0211	0.0067	0.0003	0.0011	0.0001	0.0033	4.3042e-06
1253			2-phosphoglycerate	LC/MS polar	35629	C00631	HMDB0000362	59					2.21	0.41	0.13	0.29	0.03	1.59	0.36	0.16	0.53	1.15	1.55	0.71	0.65	0.82				2.21	0.41	0.15	0.29	0.03	1.59	0.4	0.16	0.5	1.1	1.44	0.65		3.3038e-10	3.6601e-10	0.1191	0.1141	0.0024	0.0269	0.0503
1254			3-phosphoglycerate	LC/MS neg	1414	C00597	HMDB0000807	724					1.38	0.18	0.16	0.26	0.07	2.04	0.3	0.19	0.58	0.34	0.76	1.29	0.36	0.44				1.38	0.18	0.17	0.26	0.07	2.04	0.33	0.19	0.55	0.35	0.75	1.19		0	0	2.367e-12	2.9696e-10	8.5538e-05	0.0024	0.0312
1255			phosphoenolpyruvate (PEP)	LC/MS neg	597	C00074	HMDB0000263	1005					1.45	0.18	0.17	0.29	0.06	2.26	0.28	0.16	0.57	0.31	0.73	1.31	0.42	0.41				1.45	0.18	0.18	0.29	0.07	2.26	0.3	0.16	0.54	0.31	0.71	1.23		0	0	6.92e-12	4.3517e-10	0.0003	0.0048	0.0226
1256			pyruvate	LC/MS polar	22250	C00022	HMDB0000243	1060					0.93	1.02	0.56	0.96	0.65	0.87	0.59	0.57	1.09	1.09	0.84	0.84	0.89	0.92				0.93	1.02	0.58	0.96	0.68	0.87	0.64	0.57	1.1	1.13	0.8	0.78		7.6272e-11	9.5237e-11	0.3679	0.2084	0.8861	0.7235	0.6841
1257			lactate	LC/MS neg	527	C00186	HMDB0000190	612					0.86	0.99	0.85	0.96	0.8	0.84	0.76	0.76	0.81	0.88	0.91	0.84	0.83	0.74				0.86	0.99	0.91	0.96	0.85	0.84	0.8	0.76	0.8	0.87	0.86	0.79		0.0001	4.8641e-05	0.0216	0.0374	0.9093	0.7284	0.1866
1260			glycerate	LC/MS polar	1572	C00258	HMDB0006372 HMDB0000139	752;439194					1.36	0.34	0.38	0.38	0.2	1.51	0.74	0.43	0.73	0.67	0.81	0.88	0.51	0.59				1.36	0.34	0.41	0.38	0.21	1.51	0.8	0.43	0.71	0.66	0.76	0.82		0	1e-15	1.6011e-10	7.8463e-09	9.5634e-07	9.4022e-05	0.0129
1263		Pentose Phosphate Pathway	6-phosphogluconate	LC/MS neg	15442	C00345	HMDB0001316	91493					1.97	0.65	0.23	0.3	0.1	0.92	0.24	0.23	0.86	0.67	0.69	0.89	0.6	0.59				1.97	0.65	0.24	0.3	0.11	0.92	0.26	0.23	0.87	0.7	0.66	0.83		1.96e-13	3.66e-13	0.0039	0.0112	0.0529	0.2426	0.0011
1271			5-phosphoribosyl diphosphate (PRPP)	LC/MS neg	36840	C00119	HMDB0000280	7339					0.18	0.58	0.08	0.76	0.41	0.24	0.13	0.54	1	1	1	1	0.14	1				0.18	0.58	0.08	0.76	0.41	0.24	0.13	0.54	1	1	1	1		2.4822e-10	2.8351e-10	3.8643e-05	0.0003	3.8643e-05	0.0013	1.2459e-06
1274			sedoheptulose-7-phosphate	LC/MS neg	35649	C05382	HMDB0001068	616					1.38	1.07	1.47	0.82	1.45	1.05	1.86	1.9	1.36	1.36	1.07	1.08	1.13	1.46				1.38	1.07	1.52	0.82	1.57	1.05	2	1.9	1.42	1.42	1	1		1.5832e-09	1.5869e-09	0.0076	0.0183	0.382	0.59	0.0114
1278		Pentose Metabolism	ribose	LC/MS polar	1471	C00121	HMDB0000283	5779					0.77	0.65	1.08	0.85	2.11	1	2.83	1.96	1.5	1.7	0.79	0.69	0.65	1.18				0.77	0.65	1.17	0.85	2.18	1	3.12	1.96	1.43	1.74	0.76	0.63		1.9792e-06	1.2001e-06	0.4277	0.2236	0.0401	0.2135	0.4096
1279			ribitol	LC/MS polar	15772	C00532 C01904 C00474 C00379	HMDB0002917 HMDB0000508 HMDB0001851 HMDB0000568	6912					1.01	1.19	0.72	0.81	0.77	0.69	0.81	1.02	1.08	1.34	1.08	0.87	0.82	1.16				1.01	1.19	0.73	0.81	0.78	0.69	0.88	1.02	1.08	1.44	1.06	0.79		0.0042	0.0015	0.0534	0.0721	0.2766	0.509	0.9575
1280			ribonate	LC/MS polar	27731	C01685	HMDB0000867	5460677					1.03	0.95	0.99	0.88	1	0.94	1.07	1.13	1.04	1.03	0.99	1	0.9	1.03				1.03	0.95	1.06	0.88	1.06	0.94	1.14	1.13	1.03	1.03	0.94	0.94		0.3862	0.096	0.7502	0.3121	0.6452	0.6979	0.7601
1294			arabitol/xylitol	LC/MS polar	48885	C00542 C01904 C00379	HMDB0002917 HMDB0001851 HMDB0000568	6912;94154					1.06	0.99	0.68	0.86	0.64	0.92	0.8	0.79	0.99	1.17	1.06	0.9	0.91	1.05				1.06	0.99	0.71	0.86	0.66	0.92	0.86	0.79	0.99	1.2	1.02	0.84		6.7937e-07	4.4488e-07	0.6697	0.2897	0.3391	0.5573	0.5124
1300			arabonate/xylonate	LC/MS polar	48255	C00502 C05411	HMDB0000539	122045;6602431					1.27	0.85	1.18	0.72	0.94	1.08	1.23	1.42	1	0.88	1.09	1.24	0.91	1.1				1.27	0.85	1.31	0.72	0.97	1.08	1.29	1.42	0.93	0.84	1.06	1.18		0.0942	0.0269	0.1881	0.1409	0.3966	0.59	0.1863
1305			sedoheptulose	LC/MS polar	53237	C02076	HMDB0003219	5459879					1.26	0.81	1.2	0.92	1.39	1.42	1.89	1.84	1.46	1.28	1.22	1.39	1.16	1.78				1.26	0.81	1.24	0.92	1.46	1.42	2.09	1.84	1.48	1.37	1.16	1.26		0.0001	5.5431e-05	0.0138	0.0281	0.3562	0.5746	0.2517
1307			lyxonate	LC/MS polar	61858		HMDB0060255						0.99	0.88	1.87	1.03	1.33	1.16	1.34	1.16	0.71	0.63	0.89	1.01	1.02	0.63				0.99	0.88	2.07	1.03	1.46	1.16	1.44	1.16	0.7	0.61	0.81	0.93		0.0005	0.0002	0.1175	0.1135	0.4114	0.5962	0.9606
1343		Disaccharides and Oligosaccharides	sucrose	LC/MS polar	1519	C00089	HMDB0000258	5988					1.38	1	1.28	0.74	0.72	1.02	1	12.65	0.78	0.78	12.93	12.93	1.02	10.1				1.38	1	1.34	0.74	0.72	1.02	1	12.65	0.75	0.75	12.93	12.93		0.4007	0.0991	0.555	0.2574	0.3804	0.59	0.5724
1364		Fructose, Mannose and Galactose Metabolism	fructose	LC/MS polar	577	C00095	HMDB0000660	2723872					1.03	0.91	2.11	1.24	1.63	1.41	1.53	1.39	0.79	0.66	1.06	1.29	1.28	0.84				1.03	0.91	2.31	1.24	1.79	1.41	1.64	1.39	0.79	0.64	0.97	1.2		4.2062e-07	2.8429e-07	0.0508	0.0705	0.5632	0.6657	0.9009
1369			mannitol/sorbitol	LC/MS polar	46142	C00392 C00794	HMDB0000247 HMDB0000765	6251;5780					1.03	0.96	1.36	1.05	1.1	1.12	1.04	0.94	0.83	0.74	0.9	1.01	1.08	0.75				1.03	0.96	1.48	1.05	1.19	1.12	1.12	0.94	0.83	0.73	0.83	0.94		0.2034	0.0539	0.3342	0.1948	0.3298	0.552	0.7921
1380			galactitol (dulcitol)	LC/MS polar	1117	C01697	HMDB0000107	11850					1.06	0.92	1.39	0.93	1.15	1.08	1.36	1.15	0.88	0.9	0.93	0.91	0.99	0.82				1.06	0.92	1.53	0.93	1.23	1.08	1.43	1.15	0.86	0.86	0.87	0.87		0.0031	0.0011	0.7922	0.3213	0.7118	0.7142	0.586
1397		Nucleotide Sugar	UDP-glucose	LC/MS polar	32344	C00029	HMDB0000286	8629					0.38	0.9	0.18	1.7	0.57	0.71	0.15	0.21	1.2	0.74	0.64	1.03	0.64	0.76				0.38	0.9	0.19	1.7	0.64	0.71	0.15	0.21	1.26	0.72	0.56	0.98		2.2841e-08	1.9341e-08	0.4313	0.2241	0.0214	0.1472	0.011
1401			UDP-galactose	LC/MS polar	15860	C00052	HMDB0000302	18068					0.92	1.09	0.5	0.98	0.5	0.83	0.41	0.42	0.92	0.89	0.83	0.85	0.9	0.76				0.92	1.09	0.54	0.98	0.55	0.83	0.43	0.42	0.93	0.86	0.75	0.82		3.7e-10	3.9504e-10	0.5455	0.2549	0.7393	0.716	0.735
1402			UDP-glucuronate	LC/MS neg	2763	C00167	HMDB0000935	17473					0.92	1.09	0.87	0.99	0.97	0.84	0.81	1.03	1.02	1.01	1.06	1.08	0.91	1.08				0.92	1.09	0.91	0.99	1.03	0.84	0.87	1.03	1.04	1.04	1	1		0.0812	0.0233	0.7951	0.3213	0.2615	0.4975	0.4736
1405			guanosine 5'-diphospho-fucose	LC/MS neg	15903								1.12	1	1.16	0.8	0.98	0.89	1.17	1.17	0.95	1.01	0.95	0.88	0.89	0.9				1.12	1	1.24	0.8	1.02	0.89	1.26	1.17	0.92	1.02	0.92	0.82		0.0419	0.0125	0.2334	0.1596	0.5408	0.6622	0.2353
1409			UDP-N-acetylglucosamine/galactosamine	LC/MS polar	46148	C00203 C00043	HMDB0000304 HMDB0000290	44576;1167					1.08	1.04	1.04	0.82	0.95	0.86	1.11	1.3	0.98	1.11	1.13	1	0.89	1.11				1.08	1.04	1.04	0.82	0.94	0.86	1.21	1.3	0.98	1.21	1.13	0.92		0.5438	0.1299	0.8849	0.3444	0.8227	0.7184	0.6435
1410			cytidine 5'-monophospho-N-acetylneuraminic acid	LC/MS polar	36831	C00128	HMDB0001176	448209					0.96	1.04	0.78	1.02	0.79	0.94	1.02	0.89	0.97	1.36	1.15	0.83	0.98	1.12				0.96	1.04	0.87	1.02	0.88	0.94	1.08	0.89	0.97	1.29	1.04	0.78		0.165	0.0446	0.4169	0.2212	0.7755	0.718	0.5725
1424		Aminosugar Metabolism	glucuronate	LC/MS polar	15443	C16245	HMDB0000127	441478;94715;23677976;65041;444791					0.88	0.9	1.04	1.02	1.08	1	1.02	1.07	0.92	0.88	1.01	1.05	0.9	0.93				0.88	0.9	1.12	1.02	1.17	1	1.09	1.07	0.93	0.88	0.93	0.98		0.5166	0.1242	0.4475	0.2282	0.982	0.7469	0.3054
1429			N-acetylglucosamine 6-phosphate	LC/MS polar	15107	C00357	HMDB0002817	439219					1.64	0.92	0.75	0.55	0.49	0.98	0.93	0.99	1.08	1.15	1.11	1.04	0.9	1.2				1.64	0.92	0.79	0.55	0.52	0.98	1	0.99	1.08	1.18	1.06	0.97		1.8087e-05	9.5861e-06	0.002	0.0061	0.0002	0.0042	5.6811e-05
1430			N-acetyl-glucosamine 1-phosphate	LC/MS polar	15741	C04256	HMDB0001367	440364					1.69	0.91	0.67	0.53	0.45	0.99	0.87	0.91	1.14	1.17	1.07	1.04	0.9	1.22				1.69	0.91	0.71	0.53	0.48	0.99	0.93	0.91	1.14	1.19	1.01	0.97		1.2009e-06	7.5296e-07	0.0029	0.0085	0.0011	0.0134	0.0002
1436			N-acetylneuraminate	LC/MS pos early	32377	C00270	HMDB0000230	439197					1.01	1.05	1.11	0.93	1.08	0.89	1.12	1.27	0.98	1.05	1.09	1.01	0.93	1.06				1.01	1.05	1.17	0.93	1.15	0.89	1.21	1.27	0.99	1.08	1.03	0.94		0.0106	0.0035	0.903	0.3486	0.5626	0.6657	0.8765
1448			N-acetylglucosaminylasparagine	LC/MS pos early	48149	C04540	HMDB0000489	123826					1.14	1.05	1.43	0.86	1.31	0.93	1.52	1.54	1.04	1.11	1.01	0.95	0.98	1.05				1.14	1.05	1.49	0.86	1.38	0.93	1.63	1.54	1.05	1.14	0.96	0.88		5.2137e-10	5.4482e-10	0.4881	0.2385	0.5138	0.6561	0.1464
1449			erythronate*	LC/MS polar	42420		HMDB0000613	2781043					0.94	0.97	0.99	0.92	0.98	0.89	1.04	1.06	0.93	1.01	1	0.92	0.86	0.93				0.94	0.97	1.05	0.92	1.04	0.89	1.11	1.06	0.93	1.02	0.94	0.86		0.8459	0.1909	0.3108	0.187	0.8452	0.7184	0.5217
1451			N-acetylglucosamine/N-acetylgalactosamine	LC/MS polar	46539	C01074	HMDB0000212 HMDB0000215	84265;439174					1.19	1.22	1.26	0.96	1.21	0.93	1.17	1.45	1.14	1.13	1.15	1.16	1.13	1.31				1.19	1.22	1.3	0.96	1.26	0.93	1.27	1.45	1.16	1.2	1.1	1.06		0.0022	0.0008	0.1718	0.1353	0.595	0.6736	0.1922
1452			N-glycolylneuraminate	LC/MS polar	37123	C03410	HMDB0000833	123802					0.88	0.87	1.19	0.94	1.2	0.94	1.03	1.27	0.88	0.76	0.99	1.16	0.82	0.88				0.88	0.87	1.29	0.94	1.29	0.94	1.09	1.27	0.87	0.74	0.92	1.09		0.0218	0.0069	0.1242	0.1154	0.6788	0.7086	0.2922
1457	Energy	TCA Cycle	citrate	LC/MS neg	1564	C00158	HMDB0000094	311					0.64	0.71	8.41	0.87	12.6	0.78	11.96	14.64	0.96	1.01	1.01	0.96	0.56	0.97				0.64	0.71	8.89	0.87	13.46	0.78	12.82	14.64	0.97	1.02	0.94	0.89		0	0	0.0022	0.0065	0.0073	0.0617	0.0003
1459			aconitate [cis or trans]	LC/MS neg	46173	C02341 C004174	HMDB0000958 HMDB000072	643757;444212					0.7	0.53	13.23	0.64	17.47	0.85	23.9	26.22	0.92	0.95	0.96	0.93	0.45	0.89				0.7	0.53	14.13	0.64	18.69	0.85	25.51	26.22	0.92	0.95	0.9	0.87		0	0	6.1754e-06	5.7386e-05	0.0002	0.0045	0.0022
1463			alpha-ketoglutarate	LC/MS polar	528	C00026	HMDB0000208	51					1.03	0.98	1.04	0.91	0.99	0.96	1.03	1.03	0.98	0.97	0.95	0.96	0.94	0.94				1.03	0.98	1.12	0.91	1.07	0.96	1.1	1.03	0.99	0.97	0.88	0.9		0.8627	0.1941	0.9207	0.3529	0.9782	0.7469	0.6927
1466			succinate	LC/MS polar	1437	C00042	HMDB0000254	1110					0.47	0.36	0.22	0.62	0.42	0.8	0.48	0.63	0.89	0.8	0.93	1.04	0.29	0.83				0.47	0.36	0.23	0.62	0.44	0.8	0.51	0.63	0.89	0.8	0.88	0.98		0	0	1.7356e-09	5.2846e-08	4.6214e-06	0.0003	4.305e-07
1467			fumarate	LC/MS polar	1643	C00122	HMDB0000134	444972					0.89	0.85	0.89	0.89	0.91	0.93	0.79	0.96	0.91	0.76	0.95	1.13	0.8	0.86				0.89	0.85	0.94	0.89	0.97	0.93	0.86	0.96	0.92	0.78	0.89	1.05		0.0338	0.0103	0.0434	0.0629	0.6558	0.7022	0.3764
1469			malate	LC/MS neg	1303	C00497 C00149 C00711	HMDB0000744 HMDB0031518 HMDB0000156	525					0.9	0.87	0.84	0.94	0.86	0.98	0.87	0.88	0.93	0.9	0.97	1	0.85	0.9				0.9	0.87	0.9	0.94	0.93	0.98	0.92	0.88	0.93	0.89	0.89	0.93		0.0068	0.0024	0.3882	0.2134	0.9852	0.7469	0.3749
1473			itaconate	LC/MS polar	18373	C00490	HMDB0002092	811					1.17	0.69	2.78	1.12	1.14	1.89	1.42	1.05	0.48	0.35	1.03	1.4	1.31	0.5				1.17	0.69	3.23	1.12	1.26	1.89	1.53	1.05	0.46	0.33	0.93	1.3		0.0244	0.0077	0.053	0.0718	0.3619	0.5779	0.7556
1478			2-methylcitrate/homocitrate	LC/MS neg	52282	C01251	HMDB0003518 HMDB0000379	515;439459					0.93	1.64	0.82	1.37	0.92	0.77	0.4	0.6	1.04	0.81	0.9	1.15	1.27	0.93				0.93	1.64	0.86	1.37	0.98	0.77	0.43	0.6	1.06	0.82	0.84	1.07		1.8625e-08	1.5862e-08	0.2115	0.1508	0.0001	0.0029	0.5627
1484		Oxidative Phosphorylation	acetylphosphate	LC/MS polar	15488	C00227	HMDB0001494	186					1.52	0.79	1.15	0.56	0.75	1.09	1.38	1.29	0.99	0.94	0.97	1.02	0.85	0.96				1.52	0.79	1.22	0.56	0.78	1.09	1.48	1.29	0.98	0.95	0.92	0.95		0.167	0.0451	0.0189	0.0341	0.0503	0.2402	0.0029
1486			phosphate	LC/MS pos early	42109	C00009	HMDB0001429	1061					1	0.87	0.76	0.8	0.73	0.92	0.69	0.84	0.97	0.79	0.91	1.12	0.8	0.88				1	0.87	0.79	0.8	0.78	0.92	0.74	0.84	0.98	0.81	0.86	1.05		6.8847e-07	4.4885e-07	0.0079	0.0187	0.5838	0.6725	0.9775
1490	Lipid	Fatty Acid Synthesis	malonate	LC/MS polar	15872	C00383	HMDB0000691	867					0.87	0.73	0.95	0.87	0.87	1.03	0.89	1.04	0.8	0.69	1.04	1.21	0.76	0.83				0.87	0.73	1	0.87	0.95	1.03	0.96	1.04	0.83	0.7	0.95	1.12		0.3427	0.0862	0.0155	0.0306	0.7448	0.716	0.3767
1491		Fatty Acid Metabolism	acetyl CoA	LC/MS neg	43840	C00024	HMDB0001206	444493					0.66	0.63	0.2	0.75	0.31	0.78	0.32	0.41	1	1	1	1	0.49	1				0.66	0.63	0.2	0.75	0.31	0.78	0.32	0.41	1	1	1	1		2.18e-13	3.96e-13	0.1486	0.1268	0.1563	0.3942	0.0201
1505		Short Chain Fatty Acid	butyrate/isobutyrate (4:0)	LC/MS neg	40605	C00246	HMDB0000039	264					1	1	1.32	1.06	1.8	1.06	1	0.99	1.37	0.76	0.58	1.04	1.06	0.79				1	1	1.38	1.06	1.96	1.06	1	0.99	1.42	0.73	0.53	1.04		0.0973	0.0277	0.505	0.2423	0.3721	0.59	1
1522		Medium Chain Fatty Acid	5-dodecenoate (12:1n7)	LC/MS neg	33968		HMDB0000529	5312378					1.39	1.45	1.15	0.94	1.25	0.9	0.78	1.03	1.51	0.99	0.77	1.19	1.31	1.17				1.39	1.45	1.1	0.94	1.39	0.9	0.88	1.03	1.75	1.16	0.7	1.05		0.9332	0.2074	0.1305	0.1188	0.3689	0.5872	0.1989
1525		Long Chain Saturated Fatty Acid	myristate (14:0)	LC/MS neg	1365	C06424	HMDB0000806	11005					0.85	0.83	0.83	1.12	1.14	1.15	1.11	0.85	1.17	1.11	0.84	0.88	0.95	0.98				0.85	0.83	0.89	1.12	1.25	1.15	1.18	0.85	1.2	1.1	0.76	0.83		0.5101	0.1238	0.956	0.3585	0.2009	0.4531	0.1838
1528			palmitate (16:0)	LC/MS neg	1336	C00249	HMDB0000220	985					0.87	0.75	0.92	1.04	1.12	1.2	1.2	0.91	1.06	0.99	0.84	0.91	0.91	0.89				0.87	0.75	0.98	1.04	1.22	1.2	1.28	0.91	1.09	0.99	0.77	0.85		0.7926	0.1808	0.2409	0.1604	0.2342	0.4735	0.193
1530			margarate (17:0)	LC/MS neg	1121		HMDB0002259	10465					0.87	0.71	0.99	1.04	1.26	1.27	1.4	1.04	1.1	1	0.85	0.94	0.9	0.94				0.87	0.71	1.06	1.04	1.39	1.27	1.49	1.04	1.14	1	0.77	0.89		0.0342	0.0104	0.2243	0.1577	0.2044	0.4531	0.2255
1532			stearate (18:0)	LC/MS neg	1358	C01530	HMDB0000827	5281					0.9	0.69	0.86	1	1.03	1.3	1.21	0.86	1.08	0.97	0.83	0.92	0.9	0.89				0.9	0.69	0.92	1	1.14	1.3	1.28	0.86	1.11	0.96	0.75	0.87		0.5133	0.124	0.0598	0.0761	0.116	0.3455	0.3015
1534			nonadecanoate (19:0)	LC/MS neg	1356	C16535	HMDB0000772	12591					0.88	0.71	0.91	1.08	1.25	1.36	1.35	0.93	1.21	1.04	0.81	0.94	0.96	0.98				0.88	0.71	0.98	1.08	1.37	1.36	1.42	0.93	1.24	1.03	0.74	0.89		0.2091	0.0553	0.1998	0.1457	0.0721	0.2809	0.2803
1535			arachidate (20:0)	LC/MS neg	1118	C06425	HMDB0002212	10467					0.91	0.7	0.87	1.03	1.03	1.35	1.24	0.84	1.08	0.99	0.84	0.92	0.94	0.91				0.91	0.7	0.93	1.03	1.13	1.35	1.3	0.84	1.11	0.97	0.76	0.87		0.5111	0.1239	0.1231	0.1154	0.0848	0.2968	0.4181
1547		Long Chain Monounsaturated Fatty Acid	palmitoleate (16:1n7)	LC/MS neg	33447	C08362	HMDB0003229	445638					0.86	0.75	0.75	1.18	1.27	1.36	1.18	0.83	1.46	1.18	0.77	0.95	1.02	1.12				0.86	0.75	0.81	1.18	1.4	1.36	1.26	0.83	1.49	1.17	0.7	0.89		0.6303	0.1493	0.3947	0.2139	0.0364	0.2105	0.2702
1549			10-heptadecenoate (17:1n7)	LC/MS neg	33971		HMDB0060038	5312435					0.82	0.7	0.94	1.16	1.52	1.36	1.48	1.06	1.32	1.1	0.81	0.97	0.95	1.07				0.82	0.7	1.01	1.16	1.67	1.36	1.58	1.06	1.35	1.09	0.74	0.91		0.0134	0.0044	0.3921	0.2134	0.0626	0.2613	0.1476
1551			oleate/vaccenate (18:1)	LC/MS neg	52285	C01712 C08367 C00712 C21944	HMDB0000207 HMDB0000573 HMDB0003231 HMDB0240219	637517;445639;5281127;5282761					0.84	0.69	0.92	1.16	1.48	1.41	1.44	1.02	1.36	1.08	0.8	1	0.98	1.08				0.84	0.69	1	1.16	1.63	1.41	1.53	1.02	1.38	1.07	0.73	0.94		0.0345	0.0105	0.236	0.1599	0.0727	0.2809	0.2211
1558			10-nonadecenoate (19:1n9)	LC/MS neg	33972		HMDB0013622	5312513					0.86	0.71	0.94	1.16	1.5	1.41	1.48	1.06	1.37	1.11	0.82	1.01	1	1.13				0.86	0.71	1.01	1.16	1.65	1.41	1.58	1.06	1.41	1.1	0.75	0.95		0.0143	0.0046	0.2306	0.1581	0.078	0.29	0.2765
1561			eicosenoate (20:1)	LC/MS neg	33587	C16526	HMDB0002231 HMDB0062436	5282769;5282768;94159					0.93	0.71	0.94	1.14	1.38	1.5	1.47	1	1.37	1.11	0.83	1.02	1.07	1.14				0.93	0.71	1.01	1.14	1.51	1.5	1.57	1	1.4	1.11	0.76	0.96		0.0494	0.0146	0.1212	0.1152	0.1073	0.3338	0.6073
1565			erucate (22:1n9)	LC/MS neg	1552	C08316	HMDB0002068	8216;5281116					0.96	0.72	0.86	1.12	1.19	1.51	1.3	0.87	1.33	1.08	0.82	1.01	1.08	1.1				0.96	0.72	0.92	1.12	1.3	1.51	1.38	0.87	1.36	1.07	0.75	0.95		0.7199	0.167	0.0824	0.0915	0.1108	0.336	0.7593
1578		Long Chain Polyunsaturated Fatty Acid (n3 and n6)	eicosapentaenoate (EPA; 20:5n3)	LC/MS neg	18467	C06428	HMDB0001999	446284					0.76	0.71	0.97	1.25	1.68	1.35	1.6	1.04	1.32	1.17	0.77	0.88	0.96	1.02				0.76	0.71	1.06	1.25	1.87	1.35	1.69	1.04	1.35	1.13	0.7	0.83		0.0065	0.0023	0.805	0.3237	0.052	0.2424	0.1021
1579			heneicosapentaenoate (21:5n3)	LC/MS neg	57658			11998573					0.85	0.65	1.07	1.33	1.87	1.75	1.85	1.09	1.48	1.12	0.78	1.03	1.13	1.15				0.85	0.65	1.16	1.33	2.08	1.75	1.94	1.09	1.51	1.08	0.7	0.98		0.0018	0.0007	0.1351	0.1206	0.1077	0.3338	0.3775
1580			docosapentaenoate (n3 DPA; 22:5n3)	LC/MS neg	32504	C16513	HMDB0001976 HMDB0006528	6441454					0.79	0.72	1.26	1.23	2.07	1.35	1.83	1.38	1.3	1.04	0.82	1.02	0.97	1.06				0.79	0.72	1.37	1.23	2.28	1.35	1.94	1.38	1.32	1.02	0.74	0.96		6.6536e-07	4.3765e-07	0.4084	0.2204	0.145	0.3844	0.1355
1581			docosahexaenoate (DHA; 22:6n3)	LC/MS neg	44675	C06429	HMDB0002183	445580					0.83	0.69	1.19	1.21	1.81	1.44	1.68	1.21	1.25	0.98	0.81	1.04	1	1.02				0.83	0.69	1.29	1.21	2	1.44	1.78	1.21	1.27	0.96	0.73	0.98		7.8883e-05	3.7493e-05	0.2283	0.1577	0.229	0.4682	0.2392
1583			nisinate (24:6n3)	LC/MS neg	57810		HMDB0013025	11792612					0.83	0.69	0.69	1.14	1.11	1.37	1.03	0.76	1.34	1.04	0.78	1	0.95	1.04				0.83	0.69	0.75	1.14	1.23	1.37	1.1	0.76	1.37	1.02	0.7	0.94		0.0703	0.0204	0.2451	0.1623	0.1336	0.3661	0.2495
1584			hexadecadienoate (16:2n6)	LC/MS neg	57652		HMDB0000477	13932172					0.95	0.91	0.72	1.04	1.16	1.09	0.94	0.9	1.53	1.18	0.81	1.04	0.99	1.23				0.95	0.91	0.77	1.04	1.27	1.09	0.99	0.9	1.56	1.17	0.74	0.99		0.1132	0.032	0.1996	0.1457	0.0901	0.3039	0.6795
1585			linoleate (18:2n6)	LC/MS neg	1105	C01595	HMDB0000673 HMDB0006270	5280450					0.85	0.71	0.75	1.22	1.21	1.45	1.14	0.78	1.37	1.09	0.78	0.99	1.03	1.08				0.85	0.71	0.81	1.22	1.34	1.45	1.21	0.78	1.4	1.07	0.71	0.93		0.3284	0.083	0.2731	0.1722	0.0691	0.2794	0.2446
1590			dihomo-linolenate (20:3n3 or n6)	LC/MS neg	35718	C03242	HMDB0002925	5280581					0.82	0.7	0.95	1.23	1.51	1.43	1.46	0.98	1.3	1.08	0.8	0.96	1	1.04				0.82	0.7	1.04	1.23	1.66	1.43	1.54	0.98	1.32	1.05	0.73	0.91		0.0365	0.0111	0.3891	0.2134	0.0797	0.2902	0.1816
1591			arachidonate (20:4n6)	LC/MS neg	1110	C00219	HMDB0001043	444899					0.78	0.67	1.09	1.21	1.85	1.41	1.78	1.2	1.33	1.1	0.79	0.95	0.95	1.05				0.78	0.67	1.19	1.21	2.05	1.41	1.89	1.2	1.35	1.07	0.71	0.9		0.0001	4.9829e-05	0.4492	0.2282	0.0743	0.2829	0.134
1592			docosatrienoate (22:3n6)*	LC/MS neg	57467			75955220					1.03	0.62	0.85	1.02	1.34	1.7	1.46	0.99	1.62	1.06	0.75	1.15	1.05	1.22				1.03	0.62	0.91	1.02	1.48	1.7	1.55	0.99	1.67	1.06	0.68	1.08		0.1502	0.0408	0.0007	0.0027	0.0565	0.2502	0.8756
1593			adrenate (22:4n6)	LC/MS neg	32980	C16527	HMDB0002226	5497181;5282844					0.88	0.63	1.58	1.12	3.06	1.55	2.94	1.94	1.7	1.18	0.71	1.02	0.98	1.2				0.88	0.63	1.71	1.12	3.35	1.55	3.13	1.94	1.71	1.16	0.65	0.96		5.8657e-11	7.5153e-11	0.0682	0.0826	0.0411	0.2135	0.4607
1594			docosapentaenoate (n6 DPA; 22:5n6)	LC/MS neg	37478	C16513	HMDB0001976	6441454					0.91	0.67	1.42	1.01	2.15	1.38	2.22	1.65	1.38	1.04	0.77	1.03	0.92	1.07				0.91	0.67	1.54	1.01	2.39	1.38	2.35	1.65	1.42	1.02	0.7	0.97		5.7264e-09	5.2082e-09	0.1045	0.1056	0.2044	0.4531	0.6019
1595			docosadienoate (22:2n6)	LC/MS neg	32415	C16533	HMDB0061714	5282807					0.99	0.72	0.89	1.11	1.29	1.53	1.38	0.9	1.43	1.11	0.78	1	1.1	1.11				0.99	0.72	0.96	1.11	1.41	1.53	1.46	0.9	1.46	1.1	0.71	0.94		0.3082	0.0784	0.0588	0.0753	0.0931	0.3099	0.8929
1597			mead acid (20:3n9)	LC/MS neg	35174		HMDB0010378	5312531					0.92	0.65	0.88	1.12	1.63	1.58	1.53	1.06	1.7	1.12	0.72	1.1	1.03	1.23				0.92	0.65	0.94	1.12	1.81	1.58	1.63	1.06	1.77	1.12	0.65	1.03		0.0216	0.0068	0.0187	0.0341	0.0508	0.2402	0.5998
1666		Fatty Acid, Branched	(16 or 17)-methylstearate (a19:0 or i19:0)	LC/MS neg	38296		HMDB0037397	3083779					0.88	0.71	0.87	1.11	1.28	1.36	1.33	0.91	1.28	1.09	0.79	0.94	0.97	1.02				0.88	0.71	0.93	1.11	1.4	1.36	1.41	0.91	1.33	1.08	0.72	0.89		0.322	0.0818	0.2978	0.1827	0.0598	0.258	0.2733
1677		Fatty Acid, Dicarboxylate	glutarate (C5-DC)	LC/MS polar	396	C00489	HMDB0000661	743;4418048					0.9	0.85	1.15	0.84	1.04	0.89	1.13	1.29	0.81	0.84	1.05	1.01	0.76	0.85				0.9	0.85	1.24	0.84	1.11	0.89	1.21	1.29	0.81	0.83	0.98	0.95		0.026	0.0081	0.0652	0.0801	0.5779	0.6703	0.4262
1681			2-hydroxyglutarate	LC/MS polar	37253	C02630	HMDB0059655	43					0.78	0.65	1.04	0.69	1.09	0.83	1.39	1.88	0.82	0.87	1.19	1.12	0.53	0.97				0.78	0.65	1.1	0.69	1.14	0.83	1.5	1.88	0.81	0.88	1.13	1.04		0.0007	0.0003	0.0293	0.0469	0.0623	0.2613	0.169
1685			2-hydroxyadipate	LC/MS polar	31934	C02360	HMDB0000321	193530					0.71	0.93	0.94	1	1.24	0.76	1.08	1.19	0.93	1.07	0.96	0.83	0.71	0.89				0.71	0.93	1.01	1	1.26	0.76	1.18	1.19	0.88	1.09	0.94	0.76		0.1389	0.0383	0.0754	0.0879	0.5336	0.6622	0.0243
1686			3-hydroxyadipate	LC/MS polar	62069		HMDB0000345	151913					0.98	0.98	0.89	0.73	0.82	0.74	0.95	1.1	0.91	1.06	0.98	0.84	0.72	0.89				0.98	0.98	0.93	0.73	0.85	0.74	1.03	1.1	0.9	1.09	0.95	0.78		0.4784	0.1173	0.1237	0.1154	0.5488	0.6622	0.9348
1689			maleate	LC/MS polar	20676	C01384	HMDB0000176	444266					0.82	0.77	0.64	0.86	0.76	0.91	0.67	0.86	0.97	0.81	0.97	1.16	0.7	0.94				0.82	0.77	0.68	0.86	0.81	0.91	0.71	0.86	0.97	0.81	0.9	1.09		5.2491e-07	3.5315e-07	0.0169	0.0324	0.3066	0.5349	0.0859
1697			azelate (C9-DC)	LC/MS polar	18362	C08261	HMDB0000784	2266					0.82	0.55	3.12	0.94	1.19	1.38	0.91	1.09	0.31	0.16	0.85	1.65	0.77	0.27				0.82	0.55	3.6	0.94	1.27	1.38	0.99	1.09	0.29	0.15	0.8	1.52		0.1894	0.0505	1.7703e-05	0.0001	0.0857	0.2968	0.4613
1707			dodecadienoate (12:2)*	LC/MS neg	62276			25480					0.98	0.88	1.1	0.81	1.15	0.9	1.07	1.33	1.02	0.86	0.93	1.11	0.79	0.95				0.98	0.88	1.13	0.81	1.19	0.9	1.15	1.33	1.03	0.89	0.9	1.03		0.0599	0.0175	0.1983	0.1455	0.7124	0.7142	0.9546
1762		Fatty Acid, Amide	oleamide	LC/MS pos late	32458	C19670	HMDB0002117	5283387					1.06	0.68	0.65	1.39	1.85	2.15	0.16	0.6	3.02	0.17	0.45	8.21	1.47	1.36				1.06	0.68	0.71	1.39	1.72	2.15	0.19	0.6	2.56	0.18	0.49	6.94		0.0012	0.0005	3.004e-06	3.0148e-05	0.003	0.0307	0.8691
1786		Fatty Acid Metabolism (also BCAA Metabolism)	butyrylcarnitine (C4)	LC/MS pos early	32412	C02862	HMDB0002013	439829					0.83	1	0.46	1.01	0.58	0.84	0.44	0.51	1.05	0.95	0.89	0.98	0.84	0.94				0.83	1	0.49	1.01	0.63	0.84	0.46	0.51	1.06	0.94	0.82	0.93		0	0	0.392	0.2134	0.2844	0.5156	0.0704
1789			propionylcarnitine (C3)	LC/MS pos early	32452	C03017	HMDB0000824	107738					1	0.94	0.29	0.86	0.33	0.91	0.27	0.32	1.12	0.87	0.83	1.08	0.86	0.94				1	0.94	0.31	0.86	0.36	0.91	0.29	0.32	1.15	0.87	0.77	1.01		0	0	0.097	0.1009	0.6187	0.6896	0.9914
1792			methylmalonate (MMA)	LC/MS polar	1496	C02170	HMDB0000202	487					0.89	0.94	0.86	1	0.77	0.95	0.75	0.77	0.8	0.82	1	0.98	0.89	0.8				0.89	0.94	0.91	1	0.83	0.95	0.81	0.77	0.82	0.84	0.93	0.91		0.0002	7.9032e-05	0.1656	0.1315	0.8195	0.7184	0.3986
1849		Fatty Acid Metabolism (Acyl Glycine)	3-hydroxybutyroylglycine**	LC/MS pos early	62064								0.98	1.1	1.09	0.97	0.87	0.86	0.99	1	0.77	1	1.13	0.87	0.95	0.87				0.98	1.1	1.14	0.97	0.9	0.86	1.09	1	0.77	1.06	1.09	0.79		0.7174	0.1667	0.2413	0.1604	0.5939	0.6736	0.9463
1858		Fatty Acid Metabolism (Acyl Carnitine, Short Chain)	acetylcarnitine (C2)	LC/MS pos early	32198	C02571	HMDB0000201	7045767					1	0.96	0.86	0.88	0.94	0.92	0.86	0.94	1.1	0.97	0.88	1	0.88	0.97				1	0.96	0.92	0.88	1.02	0.92	0.92	0.94	1.11	0.96	0.81	0.94		0.0292	0.009	0.3222	0.1907	0.8435	0.7184	0.9496
1862		Fatty Acid Metabolism (Acyl Carnitine, Medium Chain)	hexanoylcarnitine (C6)	LC/MS pos early	32328		HMDB0000756	6426853					0.62	0.65	0.59	0.95	0.91	0.9	0.76	0.95	0.96	0.84	0.99	1.12	0.59	0.95				0.62	0.65	0.63	0.95	0.96	0.9	0.74	0.95	0.93	0.76	0.94	1.15		0.0446	0.0133	0.2159	0.1534	0.5278	0.6622	0.0312
1882		Fatty Acid Metabolism (Acyl Carnitine, Long Chain Saturated)	palmitoylcarnitine (C16)	LC/MS pos late	44681	C02990	HMDB0000222	461					0.9	0.87	1.67	0.85	1.73	0.88	1.58	2.48	0.93	0.82	1.21	1.38	0.76	1.13				0.9	0.87	1.82	0.85	1.79	0.88	1.72	2.48	0.88	0.82	1.18	1.26		1.418e-09	1.431e-09	0.5207	0.2474	0.1297	0.3641	0.4656
1884			stearoylcarnitine (C18)	LC/MS pos late	34409		HMDB0000848	3006797					0.87	0.78	2.46	0.89	2.36	0.99	2.29	2.91	0.83	0.73	1.1	1.26	0.77	0.91				0.87	0.78	2.7	0.89	2.49	0.99	2.5	2.91	0.8	0.72	1.04	1.16		2.4172e-11	3.3285e-11	0.2991	0.1831	0.7612	0.7176	0.5125
1885			arachidoylcarnitine (C20)*	LC/MS pos late	57513		HMDB0006460	53477833					0.78	0.75	3.62	0.96	2.56	1	3.28	3.67	0.55	0.68	1.37	1.12	0.75	0.76				0.78	0.75	4.09	0.96	2.62	1	3.61	3.67	0.5	0.66	1.34	1.02		2.131e-07	1.5391e-07	0.5337	0.2512	0.8665	0.7194	0.6174
1886			behenoylcarnitine (C22)*	LC/MS pos late	57514		HMDB0062468	71464577					0.55	0.46	4.47	0.83	3.57	1	4.53	5.44	0.44	0.47	1.27	1.2	0.46	0.56				0.55	0.46	5.05	0.83	3.73	1	5.01	5.44	0.41	0.46	1.22	1.09		3.4275e-09	3.3225e-09	0.0946	0.0993	0.8305	0.7184	0.3493
1906		Fatty Acid Metabolism (Acyl Carnitine, Monounsaturated)	erucoylcarnitine (C22:1)*	LC/MS pos late	57525								0.85	0.85	7.82	1	4.44	1	4.38	5.36	0.48	0.47	1.21	1.22	0.85	0.58				0.85	0.85	8.97	1	4.58	1	4.84	5.36	0.43	0.46	1.17	1.11		9.9026e-10	1.0203e-09	0.4477	0.2282	0.771	0.718	0.7293
1907			nervonoylcarnitine (C24:1)*	LC/MS pos late	57531		HMDB0006509						0.82	0.82	8.25	1	4.12	1	3.65	5.19	0.41	0.36	1.26	1.42	0.82	0.51				0.82	0.82	9.42	1	4.26	1	4.07	5.19	0.37	0.35	1.22	1.28		8.3532e-10	8.6674e-10	0.1561	0.13	0.4353	0.616	0.6771
1937		Fatty Acid Metabolism (Acyl Carnitine, Hydroxy)	(R)-3-hydroxybutyrylcarnitine	LC/MS pos early	43264		HMDB0013127	53481617					0.88	0.83	1	0.8	1.09	0.84	1.13	1.51	0.96	0.95	1.1	1.12	0.7	1.06				0.88	0.83	1.09	0.8	1.15	0.84	1.21	1.51	0.93	0.93	1.04	1.04		0.0265	0.0082	0.5428	0.2541	0.1722	0.4085	0.497
1938			(S)-3-hydroxybutyrylcarnitine	LC/MS pos early	52984		HMDB0013127	71464477					0.95	0.81	1.11	0.82	1.14	0.97	1.33	1.34	0.98	0.96	0.95	0.97	0.78	0.93				0.95	0.81	1.21	0.82	1.22	0.97	1.42	1.34	0.96	0.95	0.9	0.91		0.0014	0.0005	0.2263	0.1577	0.5492	0.6622	0.7706
1949		Carnitine Metabolism	deoxycarnitine	LC/MS pos early	36747	C01181	HMDB0001161	22620					1.12	1.05	1	0.9	1.02	0.95	1.1	1.13	1.15	1.15	0.99	0.99	1	1.14				1.12	1.05	1.05	0.9	1.09	0.95	1.17	1.13	1.16	1.17	0.93	0.92		0.1992	0.0529	0.2407	0.1604	0.6515	0.7018	0.1917
1950			carnitine	LC/MS pos early	15500	C00487 C00308	HMDB0000062	288					1.15	1.03	0.65	0.9	0.6	1.01	0.66	0.66	1.06	1.04	0.99	1.02	1.04	1.06				1.15	1.03	0.69	0.9	0.64	1.01	0.7	0.66	1.07	1.06	0.94	0.95		9.05e-13	1.532e-12	0.3829	0.213	0.8124	0.7184	0.0936
1961		Fatty Acid Metabolism (Acyl Choline)	palmitoylcholine	LC/MS pos late	52944		HMDB0240592	151731					1.06	1	1.02	0.87	1.2	0.93	1.18	1.33	1.25	1.16	0.97	1.05	0.92	1.21				1.06	1	1.04	0.87	1.22	0.93	1.23	1.33	1.24	1.17	0.95	1.01		0.0085	0.0029	0.3901	0.2134	0.3366	0.5562	0.7415
1962			oleoylcholine	LC/MS pos late	53260		HMDB0240596	59040790					1.24	1	1.86	0.89	1.29	1.09	1.65	1.29	0.85	0.89	0.89	0.86	1.09	0.76				1.24	1	1.94	0.89	1.31	1.09	1.78	1.29	0.84	0.92	0.87	0.8		0.0004	0.0002	0.822	0.3263	0.4913	0.6514	0.3443
1988		Fatty Acid, Monohydroxy	2-hydroxyoleate	LC/MS neg	54920			9796304					0.7	0.32	0.25	0.55	0.26	1.23	0.55	0.21	0.75	0.7	0.43	0.46	0.39	0.32				0.7	0.32	0.27	0.55	0.3	1.23	0.59	0.21	0.79	0.69	0.38	0.43		3e-15	7e-15	7.812e-08	1.153e-06	0.0075	0.0624	0.0813
1997			3-hydroxyhexanoate	LC/MS neg	53230		HMDB0061652 HMDB0010718	151492					1.24	1.3	1.07	0.81	0.84	0.77	0.86	1.06	0.97	1.04	1.03	0.96	1.01	1				1.24	1.3	1.12	0.81	0.9	0.77	0.91	1.06	1	1.06	0.96	0.9		0.7143	0.1664	0.7168	0.3028	0.7112	0.7142	0.3366
1998			3-hydroxyoctanoate	LC/MS neg	22001	C20793	HMDB0001954	26613					0.93	1.1	1.19	1.53	1.32	1.29	1.16	0.87	1.03	1.08	1.01	0.97	1.42	1.04				0.93	1.1	1.19	1.53	1.37	1.29	1.28	0.87	1.08	1.19	0.97	0.88		0.2654	0.069	0.5645	0.2594	0.8587	0.7184	0.5753
2008			3-hydroxyoleate*	LC/MS neg	61843								0.94	0.94	0.97	1.26	1.09	1.25	1.09	0.74	1.05	1.06	0.85	0.85	1.18	0.9				0.94	0.94	1.04	1.26	1.2	1.25	1.14	0.74	1.08	1.04	0.77	0.81		0.3818	0.095	0.9368	0.3565	0.218	0.4647	0.6159
2051		Fatty Acid, Dihydroxy	2S,3R-dihydroxybutyrate	LC/MS polar	62950		HMDB0002453	10964471					1.15	1.28	1.37	1.33	1.14	1.19	0.66	0.51	0.96	0.62	0.6	0.92	1.54	0.57				1.15	1.28	1.47	1.33	1.26	1.19	0.64	0.51	0.99	0.56	0.53	0.94		0.1322	0.0369	0.9407	0.3565	0.0661	0.2693	0.5864
2052			2R,3R-dihydroxybutyrate	LC/MS polar	63109		HMDB0000498	13120901					0.96	0.88	1.02	0.92	1	1	1.08	0.95	0.94	0.92	0.87	0.89	0.88	0.82				0.96	0.88	1.1	0.92	1.08	1	1.14	0.95	0.94	0.91	0.81	0.83		0.9506	0.2094	0.2615	0.1687	0.89	0.7255	0.7491
2054			2,4-dihydroxybutyrate	LC/MS polar	62951		HMDB0000360	192742					0.82	0.76	1.01	0.92	0.91	0.99	1.13	1	0.74	0.86	1.01	0.87	0.75	0.74				0.82	0.76	1.08	0.92	0.96	0.99	1.23	1	0.72	0.87	0.96	0.8		0.935	0.2075	0.0087	0.0202	0.6821	0.7092	0.1064
2177		Endocannabinoid	oleoyl ethanolamide	LC/MS pos late	38102		HMDB0002088	5283454					1.18	1.06	1.43	0.79	1.37	0.88	1.55	1.83	1.14	1.15	1.05	1.04	0.93	1.2				1.18	1.06	1.5	0.79	1.43	0.88	1.67	1.83	1.13	1.18	1.01	0.97		9.9739e-11	1.2246e-10	0.1742	0.1358	0.1457	0.3844	0.0799
2180			palmitoyl ethanolamide	LC/MS pos late	38165	C16512	HMDB0002100	4671					1.14	1.18	1.25	0.87	1.12	0.84	1.35	1.42	1.02	1.28	1.1	0.88	0.99	1.12				1.14	1.18	1.32	0.87	1.16	0.84	1.45	1.42	1.01	1.31	1.06	0.82		2.7562e-06	1.6051e-06	0.0214	0.0372	0.2768	0.509	0.1331
2181			stearoyl ethanolamide	LC/MS pos late	38625		HMDB0013078	27902					1.17	1.26	1.19	0.94	0.97	0.87	1.34	1.35	0.95	1.42	1.31	0.88	1.1	1.25				1.17	1.26	1.25	0.94	1.02	0.87	1.44	1.35	0.95	1.45	1.25	0.82		0.0003	0.0001	0.0003	0.0014	0.0423	0.2135	0.0725
2189			N-arachidonoyltaurine	LC/MS neg	54748			42607331					0.92	0.73	1.39	1.3	2.17	1.63	2.18	1.24	1.43	1.15	0.75	0.93	1.19	1.07				0.92	0.73	1.48	1.3	2.41	1.63	2.23	1.24	1.5	1.11	0.67	0.91		9.6203e-08	7.3444e-08	0.2254	0.1577	0.056	0.2501	0.7084
2190			N-oleoyltaurine	LC/MS neg	39732			6437033					1.05	0.73	1.1	0.99	1.42	1.42	1.8	1.19	1.35	1.19	0.83	0.94	1.03	1.11				1.05	0.73	1.18	0.99	1.57	1.42	1.89	1.19	1.39	1.17	0.75	0.89		0.0005	0.0002	0.2294	0.1577	0.1072	0.3338	0.7747
2191			N-stearoyltaurine	LC/MS neg	39730			168274					0.93	0.75	0.84	1.11	1.09	1.38	1.29	0.86	1.2	1.15	0.88	0.92	1.03	1.06				0.93	0.75	0.9	1.11	1.2	1.38	1.35	0.86	1.24	1.13	0.8	0.88		0.8795	0.1966	0.5753	0.262	0.0858	0.2968	0.5458
2192			N-palmitoyltaurine	LC/MS neg	39835			14504290					0.97	0.79	0.97	1.09	1.38	1.34	1.59	1.05	1.38	1.3	0.83	0.89	1.06	1.15				0.97	0.79	1.04	1.09	1.52	1.34	1.67	1.05	1.42	1.27	0.75	0.84		0.0186	0.0059	0.6453	0.2831	0.1104	0.336	0.81
2195			N-linoleoyltaurine*	LC/MS neg	61826			52922081					1.04	0.69	1.05	1.08	1.41	1.62	1.67	0.93	1.4	1.1	0.71	0.9	1.13	0.99				1.04	0.69	1.13	1.08	1.57	1.62	1.76	0.93	1.44	1.08	0.64	0.86		0.0319	0.0097	0.126	0.1162	0.0963	0.3105	0.8151
2200			linoleoyl ethanolamide	LC/MS neg	52608		HMDB0012252	5283446					0.92	0.67	1.03	1.17	1.78	1.61	1.81	1.12	1.58	1.17	0.74	0.99	1.07	1.16				0.92	0.67	1.1	1.17	1.98	1.61	1.91	1.12	1.65	1.15	0.66	0.94		0.0003	0.0001	0.0715	0.0853	0.0387	0.2135	0.5479
2209			palmitoleoyl ethanolamide*	LC/MS pos late	57541		HMDB0013648	9835868					1.03	1.17	0.86	0.96	1.25	0.84	1.13	1.37	1.48	1.52	1.05	1.02	0.98	1.55				1.03	1.17	0.9	0.96	1.3	0.84	1.22	1.37	1.49	1.6	1.01	0.94		0.1114	0.0315	0.0483	0.0685	0.1199	0.353	0.8924
2214			N-oleoylserine	LC/MS neg	57664			44190514					0.79	0.58	0.65	1.17	0.95	1.61	1.2	0.66	1.16	1.07	0.82	0.88	0.93	0.94				0.79	0.58	0.72	1.17	1.07	1.61	1.29	0.66	1.18	1.04	0.72	0.82		0.0405	0.0121	0.3054	0.1852	0.0822	0.2953	0.1964
2219		Inositol Metabolism	myo-inositol	LC/MS polar	1124	C00137	HMDB0000211	892					1.07	0.77	1.18	0.77	1.07	1.06	1.25	1.19	0.96	0.82	0.86	1.01	0.82	0.83				1.07	0.77	1.28	0.77	1.15	1.06	1.33	1.19	0.96	0.8	0.79	0.95		0.018	0.0058	0.007	0.0172	0.7541	0.716	0.5372
2228			inositol 1-phosphate (I1P)	LC/MS polar	43849	C01177	HMDB0000213	440194					1.02	0.55	0.31	0.51	0.37	0.93	0.75	0.77	1.2	1.34	1.06	0.95	0.51	1.27				1.02	0.55	0.31	0.51	0.38	0.93	0.84	0.77	1.26	1.5	1.02	0.85		6.5555e-07	4.3314e-07	0.1247	0.1155	0.0795	0.2902	0.9683
2250		Phospholipid Metabolism	choline	LC/MS pos early	15506	C00114	HMDB0000097	305					0.97	0.91	1.31	0.85	1.34	0.91	1.35	1.59	0.99	0.93	1.01	1.07	0.83	1				0.97	0.91	1.38	0.85	1.43	0.91	1.45	1.59	1	0.95	0.95	1		4.2463e-09	3.9598e-09	0.3056	0.1852	0.3576	0.5746	0.7678
2251			choline phosphate	LC/MS pos early	34396	C00588	HMDB0001565	1014					1.02	1.02	0.76	0.9	0.78	0.9	0.75	0.88	1.04	1.01	1.01	1.05	0.92	1.06				1.02	1.02	0.8	0.9	0.83	0.9	0.81	0.88	1.05	1.03	0.96	0.98		2.2044e-06	1.3262e-06	0.8924	0.345	0.4945	0.6527	0.8329
2252			cytidine 5'-diphosphocholine	LC/MS pos early	34418	C00307	HMDB0001413	13804					0.91	1.15	0.6	0.96	0.67	0.76	0.61	0.75	1.01	1.16	1.08	0.94	0.87	1.09				0.91	1.15	0.64	0.96	0.69	0.76	0.65	0.75	0.98	1.16	1.04	0.88		9.2499e-07	5.9515e-07	0.2531	0.1645	0.6857	0.7114	0.4871
2254			glycerophosphorylcholine (GPC)	LC/MS pos early	15990	C00670	HMDB0000086	71920					0.75	1.02	1.75	0.98	2.24	0.71	1.53	2.4	0.95	0.89	1.05	1.11	0.73	0.99				0.75	1.02	1.85	0.98	2.41	0.71	1.65	2.4	0.97	0.91	0.97	1.03		1.16e-13	2.32e-13	0.107	0.1065	0.05	0.2402	0.0201
2256			phosphoethanolamine	LC/MS pos early	1600	C00346	HMDB0000224	1015					0.93	0.75	3.23	0.7	3.13	0.87	3.72	4.92	0.9	0.87	1.1	1.15	0.65	0.99				0.93	0.75	3.42	0.7	3.29	0.87	3.99	4.92	0.9	0.88	1.04	1.07		0	0	0.0156	0.0307	0.0181	0.1356	0.5975
2257			cytidine-5'-diphosphoethanolamine	LC/MS polar	34410	C00570	HMDB0001564	123727					1.01	0.9	1	0.77	0.94	0.85	1.09	1.31	0.95	0.99	1.07	1.02	0.77	1.01				1.01	0.9	1.07	0.77	0.99	0.85	1.17	1.31	0.93	0.99	1.01	0.96		0.2207	0.058	0.4801	0.2376	0.2099	0.4589	0.8643
2258			glycerophosphoethanolamine	LC/MS polar	37455	C01233	HMDB0000114	123874					0.56	0.98	2.18	1	3.65	0.57	2.08	3.5	0.93	0.94	0.96	0.96	0.56	0.9				0.56	0.98	2.34	1	3.96	0.57	2.23	3.5	0.94	0.93	0.89	0.89		0	0	0.0001	0.0006	0.0028	0.0295	2.7703e-05
2259			glycerophosphoserine*	LC/MS pos early	57404			3081457					0.94	1.08	1	0.94	1.01	0.82	0.92	1.08	0.96	1	1	0.96	0.89	0.96				0.94	1.08	1.05	0.94	1.08	0.82	0.99	1.08	0.97	1.02	0.94	0.89		0.9367	0.2075	0.3727	0.2097	0.6821	0.7092	0.5607
2260			glycerophosphoinositol*	LC/MS polar	47155			167572					0.89	1.06	0.91	0.96	0.89	0.81	1.12	1.1	0.88	1.31	1.2	0.8	0.86	1.05				0.89	1.06	0.99	0.96	0.99	0.81	1.19	1.1	0.89	1.27	1.07	0.75		0.657	0.1549	0.238	0.1601	0.7937	0.7184	0.5867
2261			trimethylamine N-oxide	LC/MS pos early	40406	C01104	HMDB0000925	1145					1.05	0.93	1.28	0.84	1.12	0.95	1.21	1.16	0.92	0.88	0.87	0.9	0.88	0.8				1.05	0.93	1.38	0.84	1.18	0.95	1.3	1.16	0.89	0.87	0.82	0.84		0.0072	0.0025	0.1593	0.1307	0.933	0.7369	0.7109
2280		Phosphatidylcholine (PC)	1-myristoyl-2-palmitoyl-GPC (14:0/16:0)	LC/MS pos late	19258		HMDB0007869	129657					0.98	0.95	1.04	0.86	0.99	0.88	1.05	1.21	0.93	0.97	1.05	1.01	0.84	0.98				0.98	0.95	1.1	0.86	1.04	0.88	1.13	1.21	0.93	0.98	1	0.94		0.1806	0.0483	0.556	0.2574	0.4518	0.6256	0.9105
2284			1-myristoyl-2-arachidonoyl-GPC (14:0/20:4)*	LC/MS pos late	53195		HMDB0007883	24778634					1.08	1	1.29	0.85	1.36	0.91	1.33	1.67	1.14	1.04	1.04	1.14	0.91	1.18				1.08	1	1.35	0.85	1.43	0.91	1.44	1.67	1.14	1.07	0.99	1.05		2.8792e-08	2.3833e-08	0.4272	0.2236	0.2146	0.4642	0.3943
2296			1,2-dipalmitoyl-GPC (16:0/16:0)	LC/MS pos late	19130	D03585	HMDB0000564	452110					0.98	0.88	1.18	0.8	1.1	0.89	1.24	1.38	0.91	0.92	1	0.99	0.78	0.91				0.98	0.88	1.25	0.8	1.16	0.89	1.34	1.38	0.91	0.94	0.95	0.92		0.0002	0.0001	0.0993	0.1024	0.39	0.59	0.9169
2299			1-palmitoyl-2-stearoyl-GPC (16:0/18:0)	LC/MS pos late	52616	C03889	HMDB0007970	24778686					0.99	0.93	1.26	0.82	1.11	0.88	1.32	1.44	0.88	0.97	1.06	0.96	0.82	0.93				0.99	0.93	1.35	0.82	1.17	0.88	1.42	1.44	0.86	0.98	1.02	0.89		7.7474e-05	3.7053e-05	0.3828	0.213	0.3817	0.59	0.9551
2301			1-palmitoyl-2-oleoyl-GPC (16:0/18:1)	LC/MS pos late	52461	C13875	HMDB0007972	6436017					1.03	0.97	1.03	0.86	1	0.92	1.03	1.18	1	0.97	1.02	1.05	0.89	1.02				1.03	0.97	1.09	0.86	1.05	0.92	1.11	1.18	1	0.99	0.97	0.98		0.2538	0.0661	0.6827	0.2948	0.5447	0.6622	0.6566
2304			1-palmitoyl-2-linoleoyl-GPC (16:0/18:2)	LC/MS pos late	42446		HMDB0007973	5287971					1.07	1.02	0.92	0.86	0.91	0.91	0.89	1.04	1.06	0.98	0.98	1.06	0.92	1.04				1.07	1.02	0.97	0.86	0.96	0.91	0.95	1.04	1.07	1	0.93	0.99		0.172	0.0462	0.5534	0.2571	0.5733	0.6703	0.4175
2307			1-palmitoyl-2-gamma-linolenoyl-GPC (16:0/18:3n6)*	LC/MS pos late	54812		HMDB0007974	24778699					1.14	1.03	1.29	0.82	1.3	0.91	1.31	1.47	1.14	1.04	0.93	1.02	0.93	1.06				1.14	1.03	1.36	0.82	1.37	0.91	1.4	1.47	1.15	1.06	0.88	0.95		5.8586e-07	3.8884e-07	0.1578	0.1304	0.7295	0.7153	0.1558
2315			1-palmitoyl-2-arachidonoyl-GPC (16:0/20:4n6)	LC/MS pos late	52462	C05208	HMDB0007982	10747814					1.08	0.98	1.39	0.8	1.38	0.88	1.44	1.7	1.07	1.01	0.99	1.04	0.87	1.06				1.08	0.98	1.46	0.8	1.45	0.88	1.55	1.7	1.07	1.04	0.94	0.97		1.3247e-09	1.3461e-09	0.3692	0.2086	0.3445	0.5626	0.3746
2321			1-palmitoyl-2-docosahexaenoyl-GPC (16:0/22:6)	LC/MS pos late	52610		HMDB0007991	6441886					0.98	1	1.29	0.86	1.29	0.84	1.32	1.55	0.98	1.03	1.04	0.99	0.85	1.02				0.98	1	1.36	0.86	1.35	0.84	1.42	1.55	0.98	1.05	0.99	0.92		3.8988e-07	2.6595e-07	0.5906	0.2651	0.4506	0.6256	0.9576
2339			1,2-distearoyl-GPC (18:0/18:0)	LC/MS pos late	19132		HMDB0008036	94190					0.77	0.76	1.35	1.12	1.54	1.13	1.34	1.85	0.88	0.75	1.34	1.57	0.86	1.18				0.77	0.76	1.38	1.12	1.71	1.13	1.48	1.85	0.95	0.81	1.21	1.42		0.005	0.0017	0.2859	0.1784	0.7965	0.7184	0.2885
2340			1-stearoyl-2-oleoyl-GPC (18:0/18:1)	LC/MS pos late	52438		HMDB0008038	24778825					1.07	1.02	1.2	0.87	1.07	0.91	1.19	1.31	0.96	1.02	1.07	1.01	0.93	1.02				1.07	1.02	1.27	0.87	1.13	0.91	1.29	1.31	0.95	1.03	1.02	0.93		0.0016	0.0006	0.9213	0.3529	0.5038	0.6547	0.4438
2351			1-stearoyl-2-arachidonoyl-GPC (18:0/20:4)	LC/MS pos late	42450		HMDB0008048	16219824					1.06	0.97	1.5	0.82	1.39	0.9	1.45	1.8	0.98	0.94	1.07	1.11	0.87	1.04				1.06	0.97	1.58	0.82	1.45	0.9	1.56	1.8	0.97	0.96	1.02	1.03		2.2584e-10	2.5997e-10	0.5994	0.268	0.2361	0.4738	0.5373
2357			1-stearoyl-2-docosahexaenoyl-GPC (18:0/22:6)	LC/MS pos late	52611		HMDB0008057	24778876					1.02	0.96	1.56	0.81	1.41	0.87	1.58	1.76	0.92	0.97	1.02	0.97	0.83	0.94				1.02	0.96	1.64	0.81	1.48	0.87	1.7	1.76	0.92	1	0.97	0.9		1.9785e-10	2.2954e-10	0.4172	0.2212	0.4636	0.6366	0.7333
2376			1-oleoyl-2-docosahexaenoyl-GPC (18:1/22:6)*	LC/MS pos late	52697		HMDB0008123	24778955					1.06	1.02	1.19	0.84	1.15	0.88	1.21	1.41	1.03	1.04	1.03	1.02	0.89	1.06				1.06	1.02	1.25	0.84	1.21	0.88	1.3	1.41	1.03	1.07	0.98	0.95		7.7707e-05	3.7053e-05	0.6984	0.2978	0.393	0.59	0.4449
2422		Phosphatidylethanolamine (PE)	1,2-dipalmitoyl-GPE (16:0/16:0)*	LC/MS pos late	57341		HMDB0008923	445468					0.99	0.88	0.79	0.77	0.71	0.88	0.82	0.87	0.89	0.91	0.95	0.93	0.77	0.85				0.99	0.88	0.84	0.77	0.75	0.88	0.89	0.87	0.88	0.92	0.9	0.86		3.127e-05	1.5671e-05	0.0227	0.0381	0.5133	0.6561	0.961
2425			1-palmitoyl-2-stearoyl-GPE (16:0/18:0)*	LC/MS pos late	57388		HMDB08925	5326793					1.2	1.07	1.06	0.64	0.96	0.72	1.35	1.33	1.09	1.36	0.89	0.71	0.77	0.96				1.2	1.07	1.15	0.64	0.95	0.72	1.43	1.33	0.99	1.33	0.9	0.67		0.1434	0.0394	0.1337	0.1203	0.5537	0.6622	0.333
2426			1-palmitoyl-2-oleoyl-GPE (16:0/18:1)	LC/MS pos late	19263		HMDB0005320	5283496					1.01	0.98	0.85	0.84	0.78	0.86	0.83	0.9	0.93	0.96	0.97	0.94	0.84	0.9				1.01	0.98	0.89	0.84	0.82	0.86	0.89	0.9	0.93	0.98	0.92	0.87		0.0006	0.0002	0.2027	0.1473	0.7134	0.7142	0.838
2428			1-palmitoyl-2-linoleoyl-GPE (16:0/18:2)	LC/MS pos late	42449		HMDB0005322	9546747					1.1	1.06	0.65	0.84	0.58	0.87	0.63	0.7	0.97	1.01	1.01	0.97	0.92	0.98				1.1	1.06	0.7	0.84	0.6	0.87	0.67	0.7	0.95	1.02	0.97	0.91		3.0628e-11	4.1402e-11	0.6384	0.2805	0.5474	0.6622	0.348
2434			1-palmitoyl-2-arachidonoyl-GPE (16:0/20:4)*	LC/MS pos late	52464	C05210	HMDB0005323	9546800					0.99	0.96	1.25	0.81	1.23	0.84	1.32	1.49	0.98	1.02	0.98	0.94	0.8	0.96				0.99	0.96	1.32	0.81	1.3	0.84	1.43	1.49	0.98	1.04	0.92	0.87		3.3647e-06	1.9442e-06	0.2371	0.1599	0.4725	0.641	0.9872
2436			1-palmitoyl-2-docosahexaenoyl-GPE (16:0/22:6)*	LC/MS pos late	52465		HMDB0008946	9546799					0.97	0.96	1.63	0.79	1.6	0.8	1.7	2.06	0.95	0.99	1.02	0.97	0.77	0.97				0.97	0.96	1.73	0.79	1.68	0.8	1.82	2.06	0.94	1	0.97	0.91		1.432e-12	2.294e-12	0.2615	0.1687	0.3034	0.5312	0.8942
2438			1-palmitoleoyl-2-oleoyl-GPE (16:1/18:1)*	LC/MS pos late	52469		HMDB0009056	52924899					0.95	1.05	0.72	0.96	0.82	0.86	0.64	0.75	1.09	0.94	0.87	1	0.9	0.94				0.95	1.05	0.76	0.96	0.87	0.86	0.69	0.75	1.08	0.95	0.82	0.93		3.1021e-06	1.7995e-06	0.6349	0.2795	0.5132	0.6561	0.6627
2443			1-stearoyl-2-oleoyl-GPE (18:0/18:1)	LC/MS pos late	42448		HMDB0008993	9546742					1.15	1.13	0.98	0.73	0.9	0.75	1.13	1.14	1.06	1.3	0.92	0.75	0.84	0.98				1.15	1.13	1.05	0.73	0.9	0.75	1.21	1.14	0.99	1.3	0.93	0.7		0.604	0.1435	0.1056	0.106	0.6574	0.7022	0.335
2456			1-stearoyl-2-arachidonoyl-GPE (18:0/20:4)	LC/MS pos late	52447	C05210	HMDB0009003	5289133					0.98	0.93	1.14	0.89	1.12	0.94	1.16	1.3	0.96	0.95	1.04	1.04	0.87	1				0.98	0.93	1.2	0.89	1.18	0.94	1.25	1.3	0.97	0.97	0.98	0.97		0.0019	0.0007	0.6629	0.2877	0.6199	0.6896	0.8359
2460			1-stearoyl-2-docosahexaenoyl-GPE (18:0/22:6)*	LC/MS pos late	52466		HMDB0009012	9546798					0.95	0.92	1.22	0.88	1.17	0.91	1.19	1.44	0.91	0.9	1.08	1.1	0.84	0.98				0.95	0.92	1.28	0.88	1.24	0.91	1.28	1.44	0.92	0.92	1.02	1.02		4.9731e-05	2.4263e-05	0.3791	0.2128	0.3884	0.59	0.6122
2465			1-oleoyl-2-arachidonoyl-GPE (18:1/20:4)*	LC/MS pos late	55041		HMDB0009069	348281223					1.05	0.96	1.33	0.81	1.23	0.89	1.35	1.54	0.97	0.97	1.01	1.01	0.86	0.99				1.05	0.96	1.41	0.81	1.3	0.89	1.45	1.54	0.97	0.99	0.96	0.94		3.3039e-07	2.3071e-07	0.4855	0.2385	0.404	0.5936	0.5571
2469			1-oleoyl-2-docosahexaenoyl-GPE (18:1/22:6)*	LC/MS pos late	53209		HMDB0009078	52922113					1.08	0.96	1.42	0.8	1.32	0.9	1.47	1.68	1	1	1.02	1.03	0.86	1.02				1.08	0.96	1.49	0.8	1.37	0.9	1.58	1.68	0.99	1.01	0.98	0.96		4.9048e-09	4.5168e-09	0.4802	0.2376	0.3372	0.5562	0.4105
2517		Phosphatidylserine (PS)	1-palmitoyl-2-oleoyl-GPS (16:0/18:1)	LC/MS pos late	19261	C13880	HMDB0012357	5283499					1.03	1.01	0.73	0.86	0.72	0.88	0.77	0.79	1.01	1.06	0.94	0.9	0.89	0.96				1.03	1.01	0.77	0.86	0.76	0.88	0.83	0.79	1.01	1.09	0.9	0.84		1.5566e-07	1.1525e-07	0.2799	0.176	0.8502	0.7184	0.6784
2523			1-stearoyl-2-oleoyl-GPS (18:0/18:1)	LC/MS pos late	19265		HMDB0010163	9547087					1.05	0.93	1.01	0.83	0.95	0.93	1.06	1.15	0.98	0.98	1.01	1.01	0.87	0.99				1.05	0.93	1.06	0.83	0.99	0.93	1.14	1.15	0.98	1	0.96	0.94		0.4689	0.1151	0.417	0.2212	0.4516	0.6256	0.5815
2526			1-stearoyl-2-arachidonoyl-GPS (18:0/20:4)	LC/MS pos late	52235		HMDB0012383	24779545					1.12	0.92	1.35	0.77	1.13	0.94	1.38	1.59	0.94	0.94	1.08	1.08	0.86	1.02				1.12	0.92	1.42	0.77	1.21	0.94	1.47	1.59	0.95	0.95	1.01	1.01		7.564e-07	4.9097e-07	0.4197	0.2212	0.124	0.3568	0.249
2533		Phosphatidylglycerol (PG)	1,2-dipalmitoyl-GPG (16:0/16:0)	LC/MS polar	52625		HMDB0010570	11846227					0.98	1.02	0.72	0.89	0.75	0.85	0.66	0.82	1.02	0.94	0.98	1.06	0.87	1				0.98	1.02	0.75	0.89	0.79	0.85	0.7	0.82	1.03	0.96	0.92	1		2.4378e-07	1.7352e-07	0.73	0.3063	0.5159	0.657	0.9208
2537			1-palmitoyl-2-oleoyl-GPG (16:0/18:1)	LC/MS pos late	52448			70789105					0.99	1.08	0.79	0.94	0.78	0.86	0.8	0.88	0.99	1.1	1.05	0.94	0.94	1.04				0.99	1.08	0.83	0.94	0.83	0.86	0.87	0.88	0.99	1.13	1	0.87		8.8961e-05	4.2012e-05	0.4478	0.2282	0.7895	0.7184	0.9949
2544			1,2-distearoyl-GPG (18:0/18:0)	LC/MS polar	52624			11846229					0.99	0.87	0.78	0.82	0.74	0.94	0.72	0.89	0.94	0.81	0.99	1.16	0.82	0.93				0.99	0.87	0.82	0.82	0.78	0.94	0.76	0.89	0.94	0.81	0.95	1.1		4.3909e-06	2.4979e-06	0.0304	0.0479	0.412	0.5962	0.9924
2549		Phosphatidylinositol (PI)	1,2-dipalmitoyl-GPI (16:0/16:0)*	LC/MS pos late	57375		HMDB0009778						0.79	0.82	0.4	0.73	0.44	0.71	0.6	0.69	0.87	1.22	1.13	0.81	0.58	0.99				0.79	0.82	0.44	0.73	0.49	0.71	0.65	0.69	0.88	1.21	1.03	0.75		4.0492e-06	2.3215e-06	0.3246	0.1916	0.4093	0.5957	0.2076
2557			1-palmitoyl-2-arachidonoyl-GPI (16:0/20:4)*	LC/MS pos late	52467		HMDB0009789						0.95	0.95	1.51	0.96	1.47	0.97	1.5	1.65	0.93	0.94	1.07	1.06	0.91	1				0.95	0.95	1.58	0.96	1.55	0.97	1.62	1.65	0.94	0.97	1.02	0.98		3.5008e-10	3.8208e-10	0.8209	0.3263	0.8383	0.7184	0.7183
2560			1-stearoyl-2-oleoyl-GPI (18:0/18:1)*	LC/MS pos late	52726		HMDB0240667						1.04	1.02	0.5	0.88	0.46	0.9	0.48	0.52	0.97	0.99	1	0.98	0.92	0.97				1.04	1.02	0.51	0.88	0.49	0.9	0.53	0.52	0.99	1.04	0.95	0.9		0	1e-15	0.7929	0.3213	0.8422	0.7184	0.6171
2563			1,2-dioleoyl-GPI (18:1/18:1)	LC/MS polar	52619		HMDB0009837	5771759					1.08	1.04	0.69	0.82	0.62	0.85	0.61	0.76	0.96	0.91	1.01	1.07	0.88	0.97				1.08	1.04	0.72	0.82	0.65	0.85	0.65	0.76	0.97	0.93	0.96	1		1.0575e-10	1.2877e-10	0.4646	0.2331	0.2621	0.4975	0.4118
2574			1-stearoyl-2-arachidonoyl-GPI (18:0/20:4)	LC/MS pos late	52449		HMDB0009815						1.06	1.01	1.21	0.9	1.19	0.94	1.21	1.37	1.04	1.01	1.04	1.07	0.95	1.08				1.06	1.01	1.26	0.9	1.25	0.94	1.3	1.37	1.05	1.04	0.99	1		7.2993e-05	3.5147e-05	0.8507	0.3351	0.6555	0.7022	0.4709
2579			1-oleoyl-2-arachidonoyl-GPI (18:1/20:4)*	LC/MS polar	54994								1.03	0.96	1.32	0.82	1.24	0.88	1.34	1.54	0.97	0.97	1.02	1.02	0.85	0.99				1.03	0.96	1.39	0.82	1.31	0.88	1.43	1.54	0.97	0.99	0.97	0.95		1.1147e-07	8.4658e-08	0.4895	0.2385	0.3851	0.59	0.6869
2618		Lysophospholipid	1-palmitoyl-GPC (16:0)	LC/MS pos late	33955	C04102	HMDB0010382	86554					0.96	1.35	1	1.08	1.14	0.76	1.09	1.1	1.09	1.48	1.04	0.77	1.03	1.13				0.96	1.35	1.05	1.08	1.19	0.76	1.18	1.1	1.08	1.53	1	0.71		0.1452	0.0397	0.0002	0.0008	0.8369	0.7184	0.7302
2619			2-palmitoyl-GPC (16:0)*	LC/MS neg	35253		HMDB0061702	15061532					0.82	0.73	0.94	1.29	1.61	1.45	1.87	1.08	1.4	1.45	0.86	0.83	1.05	1.21				0.82	0.73	1	1.29	1.77	1.45	1.99	1.08	1.44	1.45	0.79	0.78		0.0029	0.0011	0.7384	0.3093	0.0202	0.1433	0.2292
2629			1-stearoyl-GPC (18:0)	LC/MS pos late	33961		HMDB0010384	497300					0.96	1.17	1.21	0.96	1.3	0.79	1.32	1.45	1.03	1.26	1.07	0.87	0.92	1.1				0.96	1.17	1.27	0.96	1.36	0.79	1.42	1.45	1.03	1.3	1.02	0.81		2.4479e-06	1.4602e-06	0.0263	0.0437	0.5946	0.6736	0.7621
2631			1-oleoyl-GPC (18:1)	LC/MS pos late	48258	C03916	HMDB0002815	16081932					1.03	1.31	0.94	1.08	1.08	0.85	1.09	1.09	1.18	1.51	1.09	0.86	1.12	1.29				1.03	1.31	0.98	1.08	1.12	0.85	1.19	1.09	1.17	1.58	1.06	0.79		0.467	0.1151	0.0017	0.0053	0.7468	0.716	0.7236
2634			1-linoleoyl-GPC (18:2)	LC/MS pos late	34419	C04100	HMDB0010386	11988421					1.02	1.24	0.79	1.07	0.89	0.88	0.82	0.8	1.15	1.29	0.96	0.86	1.09	1.11				1.02	1.24	0.81	1.07	0.94	0.88	0.88	0.8	1.17	1.35	0.92	0.8		0.0003	0.0001	0.0192	0.0344	0.8386	0.7184	0.83
2653			1-arachidonoyl-GPC (20:4n6)*	LC/MS neg	34061	C05208	HMDB0010395	24779476					0.82	0.69	1.06	1.22	1.89	1.44	2.32	1.49	1.45	1.5	0.96	0.92	0.99	1.39				0.82	0.69	1.14	1.22	2.03	1.44	2.49	1.49	1.46	1.51	0.89	0.86		8.5383e-06	4.6942e-06	0.5798	0.2631	0.0411	0.2135	0.3303
2667			1-lignoceroyl-GPC (24:0)	LC/MS pos late	49617		HMDB0010405	24779481					1.03	1.12	2.1	1.05	1.88	0.97	2.18	2.17	0.93	1.16	1.21	0.97	1.09	1.13				1.03	1.12	2.23	1.05	1.97	0.97	2.38	2.17	0.91	1.19	1.16	0.89		4.8e-14	1e-13	0.4172	0.2212	0.8581	0.7184	0.8043
2680			1-palmitoyl-GPE (16:0)	LC/MS pos late	35631		HMDB0011503	9547069					0.93	1.09	1.08	0.95	1.18	0.8	1.14	1.21	1.01	1.16	0.97	0.85	0.88	0.98				0.93	1.09	1.13	0.95	1.24	0.8	1.24	1.21	1.02	1.2	0.92	0.78		0.0129	0.0043	0.1177	0.1135	0.8512	0.7184	0.5081
2687			1-stearoyl-GPE (18:0)	LC/MS pos late	42398		HMDB0011130	9547068					0.97	1.08	1.17	0.95	1.24	0.85	1.22	1.34	1.03	1.13	1.02	0.93	0.92	1.05				0.97	1.08	1.22	0.95	1.31	0.85	1.32	1.34	1.04	1.17	0.97	0.86		0.0003	0.0001	0.4861	0.2385	0.7942	0.7184	0.8212
2688			2-stearoyl-GPE (18:0)*	LC/MS neg	41220		HMDB0011129	90658453;53480667					0.76	0.66	0.9	1.27	1.51	1.44	1.48	0.85	1.27	1.1	0.72	0.83	0.96	0.91				0.76	0.66	0.96	1.27	1.7	1.44	1.57	0.85	1.34	1.09	0.64	0.78		0.1283	0.0359	0.765	0.3157	0.1048	0.3336	0.1554
2689			1-oleoyl-GPE (18:1)	LC/MS neg	35628		HMDB0011506	9547071					0.79	0.68	0.67	1.24	1.18	1.44	1.28	0.68	1.4	1.29	0.71	0.77	0.98	0.99				0.79	0.68	0.72	1.24	1.32	1.44	1.36	0.68	1.45	1.28	0.64	0.72		0.3467	0.087	0.9718	0.3623	0.0401	0.2135	0.2076
2691			1-linoleoyl-GPE (18:2)*	LC/MS neg	32635		HMDB0011507	52925130					0.9	0.71	0.52	1.18	0.81	1.5	1.19	0.49	1.41	1.61	0.7	0.62	1.06	0.99				0.9	0.71	0.56	1.18	0.91	1.5	1.31	0.49	1.47	1.66	0.63	0.56		0.0032	0.0012	0.9454	0.3569	0.0708	0.2809	0.6308
2704			1-arachidonoyl-GPE (20:4n6)*	LC/MS neg	35186		HMDB0011517	42607465					0.77	0.56	0.84	1.05	1.52	1.42	1.84	1.07	1.39	1.23	0.73	0.83	0.8	1.02				0.77	0.56	0.9	1.05	1.66	1.42	1.97	1.07	1.41	1.23	0.67	0.77		0.0239	0.0075	0.6991	0.2978	0.0952	0.3105	0.2612
2719			1-palmitoyl-GPS (16:0)*	LC/MS neg	46130			9547100					0.94	0.76	0.48	1.04	0.78	1.27	1.02	0.57	1.52	1.62	0.75	0.71	0.97	1.15				0.94	0.76	0.51	1.04	0.86	1.27	1.06	0.57	1.57	1.57	0.69	0.68		0.0019	0.0007	0.7575	0.3131	0.0823	0.2953	0.5906
2720			1-stearoyl-GPS (18:0)*	LC/MS neg	45966		HMDB0061698	74819135					1	0.83	0.77	1.03	0.97	1.25	1.24	0.73	1.27	1.33	0.78	0.74	1.04	0.99				1	0.83	0.82	1.03	1.05	1.25	1.3	0.73	1.28	1.32	0.72	0.7		0.3374	0.085	0.7575	0.3131	0.1524	0.3885	0.9523
2721			1-oleoyl-GPS (18:1)	LC/MS neg	19260		HMDB0061694	85036846					1.02	0.78	0.7	1.05	1.07	1.38	1.38	0.85	1.57	1.53	0.83	0.85	1.07	1.3				1.02	0.78	0.76	1.05	1.17	1.38	1.44	0.85	1.57	1.47	0.77	0.82		0.8245	0.1872	0.5589	0.2583	0.1375	0.3747	0.9419
2726			1-palmitoyl-GPG (16:0)*	LC/MS neg	45970		HMDB0240601	3300276					0.81	0.77	0.56	1.18	0.83	1.24	0.93	0.58	1.22	1.29	0.83	0.78	0.96	1.01				0.81	0.77	0.6	1.18	0.92	1.24	0.97	0.58	1.25	1.26	0.75	0.75		7.3756e-05	3.5398e-05	0.968	0.3614	0.0698	0.2801	0.1594
2729			1-stearoyl-GPG (18:0)	LC/MS neg	34437								0.9	0.77	0.7	1.1	0.89	1.29	1.08	0.64	1.14	1.18	0.78	0.76	0.99	0.89				0.9	0.77	0.76	1.1	0.97	1.29	1.14	0.64	1.15	1.15	0.72	0.72		0.0141	0.0046	0.9589	0.3591	0.1063	0.3338	0.5028
2731			1-oleoyl-GPG (18:1)*	LC/MS neg	45968		HMDB0240602						1.04	0.71	1.39	1.05	1.95	1.53	2.43	1.67	1.45	1.24	0.9	1.05	1.08	1.3				1.04	0.71	1.51	1.05	2.14	1.53	2.56	1.67	1.47	1.2	0.81	1		8.9205e-09	7.8704e-09	0.1307	0.1188	0.1267	0.3586	0.8326
2733			1-linoleoyl-GPG (18:2)*	LC/MS neg	54885		HMDB0240600						1.27	0.85	1.82	1.24	2.23	1.84	2.6	1.29	1.55	1.22	0.71	0.91	1.56	1.11				1.27	0.85	2.02	1.24	2.52	1.84	2.79	1.29	1.58	1.17	0.63	0.85		8.7228e-06	4.7768e-06	0.221	0.1566	0.2925	0.526	0.3467
2735			1-palmitoyl-GPI (16:0)	LC/MS neg	35305		HMDB0061695	71296207					0.86	0.68	0.7	1.01	1.12	1.28	1.46	0.89	1.4	1.43	0.79	0.78	0.87	1.11				0.86	0.68	0.75	1.01	1.23	1.28	1.55	0.89	1.43	1.41	0.72	0.73		0.8313	0.1884	0.929	0.3553	0.1213	0.3552	0.4672
2739			1-stearoyl-GPI (18:0)	LC/MS neg	19324		HMDB0240261	71581135;42607495					0.91	0.76	0.77	1.1	1.1	1.32	1.26	0.8	1.31	1.25	0.8	0.83	1	1.04				0.91	0.76	0.81	1.1	1.2	1.32	1.34	0.8	1.34	1.25	0.73	0.78		0.5959	0.1418	0.8495	0.3351	0.0954	0.3105	0.5518
2741			1-oleoyl-GPI (18:1)	LC/MS neg	36602		HMDB0061693	86289645					0.91	0.67	0.59	1.02	0.94	1.38	1.21	0.69	1.44	1.36	0.75	0.79	0.93	1.08				0.91	0.67	0.64	1.02	1.04	1.38	1.27	0.69	1.48	1.34	0.68	0.75		0.1001	0.0285	0.8	0.3227	0.1301	0.3641	0.6348
2743			1-linoleoyl-GPI (18:2)*	LC/MS neg	36594		HMDB0240597	11124828					0.98	0.77	0.39	1.1	0.64	1.4	0.71	0.43	1.61	1.42	0.74	0.84	1.08	1.19				0.98	0.77	0.41	1.1	0.7	1.4	0.77	0.43	1.68	1.45	0.67	0.77		2.2391e-06	1.3411e-06	0.8155	0.3262	0.2637	0.4975	0.701
2749			1-arachidonoyl-GPI (20:4)*	LC/MS neg	34214		HMDB0061690	121596217					0.96	0.73	0.75	1.09	1.05	1.43	1.24	0.84	1.34	1.21	0.87	0.97	1.04	1.17				0.96	0.73	0.8	1.09	1.13	1.43	1.33	0.84	1.35	1.22	0.81	0.9		0.4678	0.1151	0.575	0.262	0.2932	0.526	0.7259
2818		Plasmalogen	1-(1-enyl-palmitoyl)-2-oleoyl-GPE (P-16:0/18:1)*	LC/MS pos late	52477		HMDB0011342	52925128					1.07	0.97	0.84	0.86	0.77	0.94	0.83	0.88	0.98	0.97	0.99	1.01	0.92	0.97				1.07	0.97	0.88	0.86	0.81	0.94	0.89	0.88	0.98	0.99	0.94	0.93		0.0002	9.3368e-05	0.5884	0.265	0.724	0.7142	0.4576
2819			1-(1-enyl-palmitoyl)-2-linoleoyl-GPE (P-16:0/18:2)*	LC/MS pos late	52677		HMDB0011343	52925127					0.93	0.96	0.68	0.97	0.67	0.95	0.68	0.76	0.91	0.95	1.11	1.07	0.91	1.01				0.93	0.96	0.71	0.97	0.7	0.95	0.72	0.76	0.93	0.98	1.05	1		2.3497e-08	1.9671e-08	0.7828	0.3204	0.7869	0.7184	0.517
2820			1-(1-enyl-palmitoyl)-2-palmitoyl-GPC (P-16:0/16:0)*	LC/MS pos late	52716		HMDB0011206	11146967					1.02	0.98	0.87	0.86	0.8	0.9	0.91	0.95	0.93	1.02	1.02	0.93	0.88	0.95				1.02	0.98	0.92	0.86	0.83	0.9	0.97	0.95	0.92	1.03	0.97	0.87		0.0125	0.0041	0.5425	0.2541	0.6085	0.6843	0.7733
2821			1-(1-enyl-palmitoyl)-2-palmitoleoyl-GPC (P-16:0/16:1)*	LC/MS pos late	52713		HMDB0011207	52923882					1.04	1.01	0.69	0.85	0.66	0.88	0.68	0.77	1	0.99	0.99	1	0.89	0.99				1.04	1.01	0.73	0.85	0.7	0.88	0.73	0.77	1	1.01	0.94	0.93		6.3755e-09	5.763e-09	0.6126	0.2716	0.6311	0.6922	0.5983
2822			1-(1-enyl-palmitoyl)-2-arachidonoyl-GPE (P-16:0/20:4)*	LC/MS pos late	52673		HMDB0011352	52925126					1.02	0.97	1	0.82	0.99	0.87	0.99	1.16	1	0.96	0.97	1.01	0.84	0.98				1.02	0.97	1.05	0.82	1.03	0.87	1.07	1.16	1	0.98	0.93	0.94		0.4956	0.1205	0.2934	0.1813	0.4842	0.6467	0.7754
2824			1-(1-enyl-palmitoyl)-2-oleoyl-GPC (P-16:0/18:1)*	LC/MS pos late	52478		HMDB0007996	34779384					1.06	1.02	0.81	0.88	0.72	0.92	0.78	0.85	0.95	0.98	1.03	1	0.94	0.98				1.06	1.02	0.85	0.88	0.76	0.92	0.83	0.85	0.95	1	0.98	0.93		1.6399e-05	8.7862e-06	0.8656	0.3388	0.6677	0.7044	0.4982
2827			1-(1-enyl-stearoyl)-2-oleoyl-GPE (P-18:0/18:1)	LC/MS pos late	52614		HMDB0011375	42607457					1.09	1	0.85	0.88	0.76	0.95	0.85	0.89	0.97	1	1.02	0.99	0.95	0.99				1.09	1	0.9	0.88	0.81	0.95	0.92	0.89	0.98	1.02	0.96	0.92		0.0005	0.0002	0.8471	0.3347	0.6894	0.7123	0.3591
2831			1-(1-enyl-palmitoyl)-2-arachidonoyl-GPC (P-16:0/20:4)*	LC/MS pos late	52689		HMDB0011220						1.1	0.81	1.17	0.77	1.02	1.04	1.16	1.38	0.96	0.8	1.04	1.24	0.84	0.99				1.1	0.81	1.23	0.77	1.09	1.04	1.24	1.38	0.98	0.81	0.97	1.16		0.0068	0.0024	0.0101	0.0223	0.2028	0.4531	0.3566
2832			1-(1-enyl-palmitoyl)-2-linoleoyl-GPC (P-16:0/18:2)*	LC/MS pos late	52682		HMDB0011211	24779386					1.02	0.93	0.5	0.81	0.49	0.88	0.47	0.63	0.99	0.87	1.04	1.18	0.82	1.03				1.02	0.93	0.52	0.81	0.54	0.88	0.52	0.63	1.06	0.93	0.94	1.07		4.2939e-11	5.6488e-11	0.59	0.2651	0.4769	0.6428	0.841
2836			1-(1-enyl-stearoyl)-2-arachidonoyl-GPE (P-18:0/20:4)*	LC/MS pos late	52475		HMDB0005779	9547058					1.05	0.98	1.07	0.82	1	0.88	1.09	1.24	0.98	0.99	1.02	1	0.86	1				1.05	0.98	1.13	0.82	1.05	0.88	1.17	1.24	0.97	1.01	0.97	0.94		0.0599	0.0175	0.4863	0.2385	0.3812	0.59	0.567
2852		Lysoplasmalogen	1-(1-enyl-palmitoyl)-GPC (P-16:0)*	LC/MS pos late	52474		HMDB0010407	10917802					1.08	1.15	0.79	0.91	0.76	0.85	0.83	0.86	1.04	1.21	1.03	0.88	0.98	1.07				1.08	1.15	0.83	0.91	0.79	0.85	0.89	0.86	1.02	1.23	0.99	0.82		0.0002	7.8734e-05	0.1526	0.128	0.7709	0.718	0.4336
2853			1-(1-enyl-palmitoyl)-GPE (P-16:0)*	LC/MS pos late	39270		HMDB0011152						1.05	1.23	0.72	0.97	0.77	0.82	0.72	0.75	1.11	1.24	0.95	0.85	1.01	1.06				1.05	1.23	0.75	0.97	0.8	0.82	0.78	0.75	1.12	1.29	0.91	0.79		2.5032e-06	1.4813e-06	0.0585	0.0753	0.9581	0.7395	0.6287
2855			1-(1-enyl-oleoyl)-GPE (P-18:1)*	LC/MS pos late	44621								1.09	1.32	0.89	1	0.94	0.83	0.88	0.95	1.16	1.32	1.01	0.89	1.09	1.17				1.09	1.32	0.93	1	0.99	0.83	0.95	0.95	1.16	1.36	0.96	0.82		0.1325	0.0369	0.0147	0.0295	0.9186	0.7347	0.4027
2857			1-(1-enyl-stearoyl)-GPE (P-18:0)*	LC/MS pos late	39271		HMDB0240598						1.04	1.29	0.7	1.02	0.79	0.82	0.73	0.79	1.18	1.34	1.02	0.9	1.06	1.2				1.04	1.29	0.73	1.02	0.83	0.82	0.79	0.79	1.19	1.4	0.97	0.83		6.7015e-06	3.7261e-06	0.0148	0.0295	0.7838	0.7182	0.63
2861		Glycerolipid Metabolism	glycerol	LC/MS neg	15122	C00116	HMDB0000131	753					1.2	0.9	1.04	0.87	0.9	1.16	1.19	1.18	1.04	1.03	1.14	1.15	1.04	1.18				1.2	0.9	1.17	0.87	0.92	1.16	1.3	1.18	0.94	1	1.12	1.05		0.6446	0.1525	0.3628	0.206	0.4724	0.641	0.2739
2862			glycerol 3-phosphate	LC/MS pos early	43847	C0093	HMDB0000126	754					1.37	0.44	0.37	0.38	0.26	1.2	0.83	0.67	0.95	0.98	0.99	0.96	0.52	0.94				1.37	0.44	0.39	0.38	0.27	1.2	0.88	0.67	0.95	0.98	0.93	0.9		1e-15	3e-15	1.7732e-08	3.7075e-07	2.7579e-08	4.6834e-06	0.0039
2867			glycerophosphoglycerol	LC/MS polar	48857	C03274	HMDB0240316	54575349					0.84	1	0.79	0.97	0.89	0.82	0.83	0.9	0.95	1.05	0.97	0.88	0.82	0.93				0.84	1	0.84	0.97	0.95	0.82	0.89	0.9	0.95	1.05	0.91	0.82		0.0009	0.0003	0.0609	0.0771	0.7199	0.7142	0.0782
2868		Monoacylglycerol	1-myristoylglycerol (14:0)	LC/MS neg	35625	C01885	HMDB0011561	10957631					1.08	0.95	0.62	0.79	0.72	0.89	0.85	0.87	1.25	1.3	0.95	0.92	0.85	1.19				1.08	0.95	0.65	0.79	0.77	0.89	0.9	0.87	1.27	1.31	0.89	0.86		0.0131	0.0043	0.6842	0.295	0.5533	0.6622	0.7846
2871			1-palmitoylglycerol (16:0)	LC/MS neg	21127		HMDB0011564	14900					0.49	0.43	0.54	1.37	1.28	1.57	2.09	0.74	1.18	1.68	0.79	0.56	0.67	0.93				0.49	0.43	0.57	1.37	1.44	1.57	2.25	0.74	1.24	1.69	0.71	0.52		0.7455	0.1714	0.819	0.3262	0.1591	0.3972	0.138
2872			1-palmitoleoylglycerol (16:1)*	LC/MS neg	52431		HMDB0011565						0.92	0.91	1.75	1.28	1.25	1.3	1.83	0.86	0.66	0.95	0.88	0.62	1.18	0.58				0.92	0.91	1.83	1.28	1.36	1.3	2.04	0.86	0.68	1.01	0.81	0.55		0.3263	0.0826	0.9315	0.3557	0.5033	0.6547	0.839
2875			1-oleoylglycerol (18:1)	LC/MS neg	21184		HMDB0011567	5283468					0.88	0.83	1	1.25	1.28	1.33	1.2	0.89	1.13	0.99	0.86	0.98	1.1	0.97				0.88	0.83	1.05	1.25	1.4	1.33	1.33	0.89	1.18	1.05	0.79	0.89		0.4884	0.1195	0.7103	0.3005	0.6264	0.6922	0.3874
2876			1-linoleoylglycerol (18:2)	LC/MS neg	27447		HMDB0011568	5283469					0.94	0.82	1	1.59	1.03	1.83	1	1.08	0.97	0.82	1.67	1.98	1.5	1.62				0.94	0.82	1.06	1.59	1.12	1.83	1.07	1.08	1	0.83	1.53	1.85		0.8737	0.1957	0.3212	0.1905	0.9983	0.7546	0.7958
2882			1-arachidonylglycerol (20:4)	LC/MS neg	34397	C13857	HMDB11578	16019980;5282281					0.92	0.71	1.2	0.98	1.36	1.27	1.66	1.43	1.04	0.98	1.03	1.09	0.9	1.07				0.92	0.71	1.27	0.98	1.46	1.27	1.81	1.43	1.05	1	0.96	1		0.0006	0.0002	0.3347	0.1948	0.5765	0.6703	0.7254
2886			1-docosahexaenoylglycerol (22:6)	LC/MS neg	35153		HMDB0011587	53480995					0.87	0.57	1.06	0.82	1.25	1.25	1.48	1.43	1.03	0.8	0.93	1.2	0.71	0.96				0.87	0.57	1.1	0.82	1.37	1.25	1.59	1.43	1.09	0.82	0.85	1.12		0.0139	0.0045	0.0313	0.049	0.5461	0.6622	0.42
2888			2-palmitoylglycerol (16:0)	LC/MS neg	33419		HMDB0011533	123409					0.44	0.46	1.9	1.16	3.02	1.11	1.74	1.3	0.7	0.42	0.5	0.83	0.51	0.35				0.44	0.46	2.16	1.16	1.98	1.11	1.92	1.3	0.4	0.41	0.77	0.76		0.0392	0.0118	0.4231	0.2221	0.3568	0.5746	0.0657
2891			2-oleoylglycerol (18:1)	LC/MS neg	21232		HMDB0011537	5319879					0.91	0.8	0.76	1.2	1.06	1.37	1.04	0.89	1.27	1.1	1.01	1.17	1.09	1.28				0.91	0.8	0.83	1.2	1.18	1.37	1.12	0.89	1.3	1.08	0.9	1.09		0.2704	0.0699	0.4295	0.2236	0.4717	0.641	0.4732
2893			2-arachidonoylglycerol (20:4)	LC/MS neg	19266	C13856	HMDB0004666	5282280					0.71	0.47	0.73	1.15	1.32	1.72	1.99	1.12	1.27	1.28	0.98	0.97	0.81	1.24				0.71	0.47	0.79	1.15	1.48	1.72	2.17	1.12	1.33	1.3	0.87	0.89		0.1337	0.0372	0.3413	0.1969	0.0291	0.1902	0.1473
2909		Diacylglycerol	diacylglycerol (16:1/18:2 [2], 16:0/18:3 [1])*	LC/MS pos late	54966								1.14	1.17	0.69	1.18	1.41	1.16	0.9	1.2	2.35	1.53	1	1.53	1.35	2.35				1.14	1.17	0.73	1.18	1.54	1.16	1	1.2	2.42	1.61	0.92	1.39		0.945	0.2084	0.1133	0.1102	0.6307	0.6922	0.6061
2925			palmitoyl-oleoyl-glycerol (16:0/18:1) [2]*	LC/MS pos late	54942	C13861	HMDB0007102	5282283					0.99	1.19	0.85	0.93	1.08	0.78	0.92	1.11	1.26	1.29	0.96	0.93	0.92	1.2				0.99	1.19	0.88	0.93	1.1	0.78	1	1.11	1.24	1.35	0.94	0.86		0.7446	0.1714	0.0775	0.0884	0.2627	0.4975	0.9468
2933			palmitoyl-arachidonoyl-glycerol (16:0/20:4) [1]*	LC/MS pos late	54957		HMDB0007112	9543736					1.14	1.11	1.75	0.62	2.44	0.64	3.04	3.7	1.59	1.93	0.94	0.78	0.71	1.5				1.14	1.11	1.72	0.62	2.37	0.64	3.26	3.7	1.57	2.11	0.97	0.73		3.8635e-06	2.2236e-06	0.2086	0.15	0.2974	0.5261	0.7103
2934			palmitoyl-arachidonoyl-glycerol (16:0/20:4) [2]*	LC/MS pos late	54958		HMDB0007112	9543736					1	0.93	1.43	0.81	1.68	0.87	1.72	2.09	1.18	1.12	1.01	1.06	0.82	1.19				1	0.93	1.51	0.81	1.75	0.87	1.87	2.09	1.16	1.15	0.97	0.98		6.81e-13	1.167e-12	0.4608	0.2323	0.0861	0.2968	0.8966
2947			oleoyl-linoleoyl-glycerol (18:1/18:2) [2]	LC/MS pos late	46799		HMDB0007219	71433693					1.62	1.35	1.25	0.64	1.06	0.78	1.17	1.4	1.39	1.26	0.85	0.93	1.05	1.17				1.62	1.35	1.38	0.64	1.05	0.78	1.23	1.4	1.24	1.2	0.86	0.88		0.2857	0.0731	0.4208	0.2214	0.9791	0.7469	0.3219
2958			stearoyl-arachidonoyl-glycerol (18:0/20:4) [2]*	LC/MS pos late	57449		HMDB0007170	6438587					0.93	0.81	2.02	0.79	2.58	0.92	2.94	3.03	1.19	1.17	0.93	0.95	0.74	1.11				0.93	0.81	2.12	0.79	2.73	0.92	3.16	3.03	1.2	1.2	0.88	0.88		0	0	0.1758	0.1365	0.0372	0.2129	0.5522
2960			oleoyl-arachidonoyl-glycerol (18:1/20:4) [2]*	LC/MS pos late	54961		HMDB0007228	9543786					1.02	0.97	1.67	0.82	1.93	0.85	1.87	2.15	1.17	1.09	0.91	0.98	0.83	1.07				1.02	0.97	1.8	0.82	2	0.85	2.04	2.15	1.13	1.1	0.88	0.89		2.16e-13	3.96e-13	0.308	0.1862	0.4731	0.641	0.7811
3020		Sphingolipid Synthesis	sphinganine	LC/MS pos late	17769	C00836	HMDB0000269	3126					1.22	0.96	1.23	0.79	1.17	1	1.39	1.44	1.15	1.08	0.97	1.04	0.96	1.12				1.22	0.96	1.27	0.79	1.23	1	1.5	1.44	1.18	1.13	0.92	0.96		2.7441e-06	1.6045e-06	0.0473	0.0678	0.3189	0.5379	0.0395
3022			sphingadienine	LC/MS pos late	57426			6449795					1.4	1.24	1.16	0.91	1.19	1.02	1.11	1.32	1.44	1.19	1.01	1.23	1.27	1.45				1.4	1.24	1.2	0.91	1.26	1.02	1.2	1.32	1.47	1.23	0.95	1.13		0.011	0.0037	0.0019	0.006	0.7621	0.7176	0.0081
3023			phytosphingosine	LC/MS pos late	1510	C12144	HMDB0004610	122121					1.24	1.26	0.73	0.93	0.86	0.91	0.71	0.9	1.46	1.23	0.97	1.15	1.15	1.42				1.24	1.26	0.74	0.93	0.9	0.91	0.76	0.9	1.51	1.29	0.92	1.08		7.964e-05	3.7731e-05	0.0013	0.0042	0.311	0.5353	0.0417
3029		Dihydroceramides	N-palmitoyl-sphinganine (d18:0/16:0)	LC/MS pos late	52604		HMDB11760	5283572					1.09	0.78	4.94	0.67	3.87	0.93	5.52	6.02	0.86	0.88	1.04	1.02	0.73	0.89				1.09	0.78	5.26	0.67	4.04	0.93	6.01	6.02	0.84	0.9	1	0.93		0	0	0.0903	0.0968	0.1461	0.3844	0.3185
3041		Ceramides	N-palmitoyl-sphingosine (d18:1/16:0)	LC/MS pos late	44877		HMDB0004949	5283564					1.09	0.98	1.63	0.81	1.45	0.91	1.56	1.83	0.97	0.94	1.02	1.06	0.89	0.99				1.09	0.98	1.71	0.81	1.52	0.91	1.68	1.83	0.97	0.96	0.98	0.98		2.7065e-11	3.6924e-11	0.4873	0.2385	0.398	0.59	0.3545
3043			N-(2-hydroxypalmitoyl)-sphingosine (d18:1/16:0(2OH))	LC/MS pos late	57697			72715801					1	1	5.04	1.03	5.19	1.03	4.49	4.92	1.03	0.89	0.97	1.12	1.03	1				1	1	5.35	1.03	5.26	1.03	4.84	4.92	0.98	0.91	0.96	1.04		0	0	0.5688	0.2604	0.6372	0.6922	1
3051			N-palmitoyl-sphingadienine (d18:2/16:0)*	LC/MS pos late	57416		HMDB0240686						0.87	0.89	1.78	1.04	1.74	1.02	1.38	1.91	0.86	0.69	1.14	1.4	0.91	0.97				0.87	0.89	1.83	1.04	1.89	1.02	1.52	1.91	0.91	0.74	1.05	1.27		1.0706e-06	6.7476e-07	0.1865	0.1402	0.5105	0.6561	0.4438
3053			N-behenoyl-sphingadienine (d18:2/22:0)*	LC/MS pos late	57372								0.47	0.44	0.76	1.49	1.05	1.6	1.25	0.82	0.64	0.72	1.16	1.04	0.7	0.75				0.47	0.44	0.8	1.49	1.16	1.6	1.22	0.82	0.68	0.67	1.06	1.07		0.3882	0.0963	0.0713	0.0853	0.5015	0.6547	0.0074
3054			N-nervonoyl-sphingadiene (d18:2/24:1)*	LC/MS pos late	57442								1.04	0.99	1.26	0.86	1.19	0.91	1.19	1.49	0.98	0.93	1.08	1.13	0.9	1.06				1.04	0.99	1.33	0.86	1.25	0.91	1.29	1.49	0.97	0.96	1.03	1.05		2.5262e-05	1.2969e-05	0.8293	0.3282	0.3083	0.5353	0.628
3063			N-palmitoyl-heptadecasphingosine (d17:1/16:0)*	LC/MS pos late	57430		HMDB0240685						1.11	1.03	1.99	0.84	1.77	0.9	1.83	2.21	0.99	0.95	1.05	1.09	0.93	1.03				1.11	1.03	2.1	0.84	1.86	0.9	1.98	2.21	0.98	0.97	1	1.01		1e-15	2e-15	0.7482	0.3118	0.3822	0.59	0.2916
3067			ceramide (d18:1/14:0, d16:1/16:0)*	LC/MS pos late	57432		HMDB0011773 HMDB0240681						0.97	0.86	1.54	0.93	1.38	1.04	1.26	1.7	0.87	0.71	1.14	1.4	0.89	0.99				0.97	0.86	1.59	0.93	1.49	1.04	1.37	1.7	0.9	0.74	1.06	1.28		1.4271e-05	7.7022e-06	0.0858	0.0949	0.415	0.5972	0.8278
3068			ceramide (d18:1/17:0, d17:1/18:0)*	LC/MS pos late	57434		HMDB0240678 HMDB0240683						1.06	0.94	2.04	0.84	1.91	0.95	2.09	2.53	1	0.96	1.1	1.15	0.89	1.1				1.06	0.94	2.16	0.84	2	0.95	2.27	2.53	0.99	0.98	1.06	1.06		0	1e-15	0.6982	0.2978	0.3186	0.5379	0.4988
3071			ceramide (d16:1/24:1, d18:1/22:1)*	LC/MS pos late	57437								0.96	0.84	1.31	0.6	1.22	0.68	1.04	2.42	0.89	0.67	1.19	1.59	0.57	1.06				0.96	0.84	1.36	0.6	1.33	0.68	1.14	2.42	0.94	0.71	1.09	1.45		0.0103	0.0035	0.1633	0.1315	0.0303	0.1954	0.9055
3076		Hexosylceramides (HCER)	glycosyl-N-stearoyl-sphinganine (d18:0/18:0)*	LC/MS pos late	57418			6321364					0.97	0.68	1.55	0.65	1.42	0.93	2.14	2.5	0.89	0.93	1.14	1.09	0.63	1.02				0.97	0.68	1.63	0.65	1.52	0.93	2.29	2.5	0.91	0.95	1.07	1.02		4.1716e-11	5.5374e-11	0.1504	0.1279	0.0406	0.2135	0.7442
3078			glycosyl-N-palmitoyl-sphingosine (d18:1/16:0)	LC/MS pos late	53013								1.04	0.98	1.15	0.89	1.19	0.94	1.21	1.3	1.08	1.03	0.97	1.01	0.92	1.05				1.04	0.98	1.2	0.89	1.25	0.94	1.31	1.3	1.08	1.07	0.93	0.94		0.0003	0.0001	0.6625	0.2877	0.7822	0.718	0.6177
3102			glycosyl ceramide (d18:1/23:1, d17:1/24:1)*	LC/MS pos late	57448								1.17	1.01	0.64	0.84	0.73	0.97	0.79	0.87	1.33	1.25	1	1.06	0.98	1.33				1.17	1.01	0.65	0.84	0.77	0.97	0.86	0.87	1.39	1.33	0.94	0.98		8.7535e-06	4.7768e-06	0.0558	0.0729	0.2283	0.4682	0.162
3103			glycosyl ceramide (d18:2/24:1, d18:1/24:2)*	LC/MS pos late	57453								1	1.01	0.75	0.98	0.99	0.97	0.89	1.06	1.32	1.2	1.06	1.16	0.98	1.39				1	1.01	0.78	0.98	1.05	0.97	0.97	1.06	1.35	1.27	1	1.06		0.2258	0.0592	0.3848	0.2131	0.2601	0.4975	0.9487
3108		Lactosylceramides (LCER)	lactosyl-N-palmitoyl-sphingosine (d18:1/16:0)	LC/MS pos late	53010		HMDB0006750	53477895					1.06	1.04	0.59	0.83	0.54	0.85	0.59	0.64	0.98	1.04	0.99	0.93	0.88	0.97				1.06	1.04	0.62	0.83	0.56	0.85	0.63	0.64	0.96	1.05	0.94	0.86		4.232e-12	6.298e-12	0.4491	0.2282	0.663	0.7044	0.4918
3112			lactosyl-N-nervonoyl-sphingosine (d18:1/24:1)*	LC/MS pos late	57370		HMDB0004872						1.05	0.98	0.43	0.85	0.42	0.91	0.48	0.51	1.02	1.08	1.04	0.98	0.89	1.06				1.05	0.98	0.45	0.85	0.44	0.91	0.52	0.51	1.02	1.13	0.99	0.9		0	0	0.7846	0.3206	0.4611	0.6349	0.5761
3119		Dihydrosphingomyelins	myristoyl dihydrosphingomyelin (d18:0/14:0)*	LC/MS pos late	57365		HMDB0012085	44260138					1.11	0.75	3.16	0.62	2.56	0.93	4.12	4.15	0.9	0.97	1.01	0.93	0.69	0.91				1.11	0.75	3.34	0.62	2.71	0.93	4.42	4.15	0.9	0.99	0.95	0.87		0	0	0.0099	0.0223	0.0096	0.0775	0.2275
3120			palmitoyl dihydrosphingomyelin (d18:0/16:0)*	LC/MS pos late	52434		HMDB0010168	9939965					1.11	0.75	2.68	0.64	2.17	0.93	3.3	3.24	0.89	0.93	0.95	0.92	0.7	0.85				1.11	0.75	2.86	0.64	2.27	0.93	3.56	3.24	0.88	0.94	0.91	0.85		0	0	0.0056	0.0145	0.0447	0.2233	0.2587
3121			behenoyl dihydrosphingomyelin (d18:0/22:0)*	LC/MS pos late	57331		HMDB0012091	44260132					0.89	0.53	2.08	0.74	1.86	1.22	2.67	3.28	0.79	0.69	1.3	1.5	0.65	1.03				0.89	0.53	2.18	0.74	2.05	1.22	2.96	3.28	0.83	0.73	1.18	1.36		1.1285e-07	8.4835e-08	0.1122	0.1096	0.5815	0.6717	0.7008
3122			sphingomyelin (d18:0/18:0, d19:0/17:0)*	LC/MS pos late	57473		HMDB0012087	44260130					0.98	0.7	1.42	0.64	1.29	0.89	1.94	2.05	0.89	0.96	1.01	0.94	0.62	0.9				0.98	0.7	1.5	0.64	1.34	0.89	2.09	2.05	0.87	0.98	0.97	0.87		8.3221e-11	1.0304e-10	0.0055	0.0144	0.0201	0.1433	0.9714
3123			sphingomyelin (d18:0/20:0, d16:0/22:0)*	LC/MS pos late	57476		HMDB0012090						1.21	0.86	1.94	0.56	1.66	0.79	3.07	2.83	1.03	1.36	0.96	0.73	0.68	0.99				1.21	0.86	2.1	0.56	1.65	0.79	3.3	2.83	0.95	1.35	0.96	0.68		1.201e-12	1.966e-12	0.0493	0.0694	0.0346	0.2076	0.1508
3124		Sphingomyelins	palmitoyl sphingomyelin (d18:1/16:0)	LC/MS pos late	37506		HMDB0010169	9939941					1.07	0.92	1.04	0.83	0.96	0.96	1.07	1.18	0.99	0.95	1.02	1.06	0.89	1				1.07	0.92	1.09	0.83	1.02	0.96	1.16	1.18	0.99	0.97	0.96	0.98		0.2421	0.0633	0.3324	0.1944	0.4236	0.6033	0.451
3126			stearoyl sphingomyelin (d18:1/18:0)	LC/MS pos late	19503	C00550	HMDB0001348	6453725					1.05	0.93	0.53	0.79	0.51	0.9	0.57	0.63	1	0.99	0.98	0.99	0.83	0.98				1.05	0.93	0.57	0.79	0.53	0.9	0.61	0.63	0.98	1	0.94	0.93		4.1e-14	8.8e-14	0.2706	0.171	0.3973	0.59	0.5484
3127			behenoyl sphingomyelin (d18:1/22:0)*	LC/MS pos late	48492		HMDB0012103	44260125					0.92	0.85	0.68	1.03	0.75	1.11	0.66	0.86	1	0.83	1.18	1.43	0.94	1.18				0.92	0.85	0.7	1.03	0.82	1.11	0.72	0.86	1.07	0.88	1.08	1.31		0.0014	0.0005	0.4114	0.221	0.7759	0.718	0.6178
3128			tricosanoyl sphingomyelin (d18:1/23:0)*	LC/MS pos late	52436		HMDB0012105						1.01	0.98	0.86	1.09	0.94	1.12	0.92	1.01	1.11	1.05	1.17	1.24	1.1	1.3				1.01	0.98	0.88	1.09	1.02	1.12	1	1.01	1.18	1.11	1.08	1.14		0.3539	0.0887	0.4111	0.221	0.8745	0.7194	0.9393
3129			lignoceroyl sphingomyelin (d18:1/24:0)	LC/MS pos late	57330		HMDB0011697						1.03	0.97	0.65	0.89	0.63	0.96	0.74	0.74	1	1.1	1.05	0.96	0.92	1.06				1.03	0.97	0.68	0.89	0.67	0.96	0.81	0.74	1.01	1.15	1	0.88		3.0644e-08	2.5084e-08	0.9502	0.3574	0.6225	0.691	0.7184
3131			sphingomyelin (d18:2/23:1)*	LC/MS pos late	57482		HMDB0240668						1.19	0.99	0.85	0.77	0.6	0.92	0.85	0.96	0.84	0.98	1.23	1.04	0.91	1.03				1.19	0.99	0.87	0.77	0.61	0.92	0.92	0.96	0.84	1.04	1.2	0.97		0.0159	0.0051	0.8877	0.3446	0.1686	0.4085	0.2812
3133			sphingomyelin (d17:1/14:0, d16:1/15:0)*	LC/MS pos late	62152								1.13	1.05	1.14	0.89	1.16	0.97	1.27	1.45	1.16	1.16	1.11	1.11	1.01	1.28				1.13	1.05	1.18	0.89	1.23	0.97	1.36	1.45	1.19	1.21	1.05	1.03		0.0001	5.2743e-05	0.2689	0.1708	0.3145	0.5375	0.222
3134			sphingomyelin (d18:1/14:0, d16:1/16:0)*	LC/MS pos late	42463		HMDB0012097	11433862					1.11	0.97	1.05	0.87	0.99	0.99	1.13	1.23	1.05	1.05	1.08	1.07	0.96	1.13				1.11	0.97	1.1	0.87	1.06	0.99	1.21	1.23	1.07	1.08	1.01	1		0.0564	0.0166	0.6519	0.2839	0.3237	0.5442	0.259
3135			sphingomyelin (d18:2/14:0, d18:1/14:1)*	LC/MS pos late	47154		HMDB0240637 HMDB0240612						1.19	1.06	1.13	0.89	1.18	1	1.31	1.37	1.25	1.23	1.04	1.05	1.06	1.29				1.19	1.06	1.17	0.89	1.25	1	1.41	1.37	1.28	1.28	0.98	0.98		0.0002	7.825e-05	0.0553	0.0729	0.4923	0.6514	0.0835
3136			sphingomyelin (d17:1/16:0, d18:1/15:0, d16:1/17:0)*	LC/MS pos late	52433		HMDB0240608 HMDB0240617						1.09	1.04	1.13	0.85	1.12	0.89	1.19	1.32	1.07	1.09	1	0.99	0.92	1.07				1.09	1.04	1.19	0.85	1.18	0.89	1.27	1.32	1.08	1.1	0.94	0.92		0.001	0.0004	0.4934	0.2394	0.5597	0.6654	0.3386
3137			sphingomyelin (d17:2/16:0, d18:2/15:0)*	LC/MS pos late	57483		HMDB0240677						1.07	1.07	1.07	0.91	1.11	0.91	1.04	1.35	1.11	1.04	1.11	1.18	0.97	1.23				1.07	1.07	1.12	0.91	1.2	0.91	1.13	1.35	1.14	1.08	1.03	1.09		0.0188	0.006	0.6479	0.2832	0.2565	0.4969	0.5312
3138			sphingomyelin (d18:2/16:0, d18:1/16:1)*	LC/MS pos late	42459		HMDB0240613 HMDB0240638						1.11	1.05	1.16	0.9	1.07	0.94	1.13	1.26	1.03	1.03	1.05	1.06	0.99	1.08				1.11	1.05	1.21	0.9	1.14	0.94	1.21	1.26	1.04	1.05	0.99	0.98		0.0069	0.0024	0.8238	0.3265	0.6738	0.7049	0.2802
3139			sphingomyelin (d18:1/17:0, d17:1/18:0, d19:1/16:0)	LC/MS pos late	52615		HMDB0240609 HMDB0240622 HMDB0240620	46891763					1.24	1.09	1.48	0.74	1.18	0.85	1.44	1.58	0.99	1.05	0.99	0.93	0.92	0.98				1.24	1.09	1.58	0.74	1.24	0.85	1.55	1.58	0.97	1.06	0.95	0.87		5.4244e-05	2.6378e-05	0.5103	0.2439	0.5123	0.6561	0.1082
3140			sphingomyelin (d18:1/18:1, d18:2/18:0)	LC/MS pos late	37529		HMDB0012101	6443882					1.02	0.8	0.91	0.8	0.9	1.01	1.02	1.09	1.02	0.91	0.96	1.08	0.82	0.98				1.02	0.8	0.96	0.8	0.94	1.01	1.09	1.09	1.01	0.92	0.92	1.01		0.562	0.134	0.0269	0.0441	0.3876	0.59	0.7313
3141			sphingomyelin (d18:1/19:0, d19:1/18:0)*	LC/MS pos late	57475								1.08	0.95	0.54	0.77	0.56	0.88	0.65	0.7	1.12	1.15	0.97	0.94	0.84	1.08				1.08	0.95	0.57	0.77	0.59	0.88	0.7	0.7	1.13	1.18	0.91	0.87		7.0744e-11	8.909e-11	0.2819	0.1764	0.2833	0.5154	0.4617
3142			sphingomyelin (d18:1/20:0, d16:1/22:0)*	LC/MS pos late	48490		HMDB0012102	44260124					1.1	0.98	0.57	0.83	0.54	0.93	0.64	0.66	1.04	1.09	1.01	0.96	0.91	1.05				1.1	0.98	0.6	0.83	0.57	0.93	0.69	0.66	1.03	1.12	0.97	0.89		3.562e-12	5.41e-12	0.6075	0.2703	0.4081	0.5957	0.3197
3145			sphingomyelin (d18:1/21:0, d17:1/22:0, d16:1/23:0)*	LC/MS pos late	52495		HMDB0240621 HMDB0240611 HMDB0240619						1.03	0.99	0.86	0.99	0.86	1.03	0.83	1.02	1.02	0.95	1.17	1.26	1.02	1.2				1.03	0.99	0.9	0.99	0.95	1.03	0.92	1.02	1.08	1.02	1.07	1.14		0.1043	0.0296	0.6912	0.2965	0.7859	0.7184	0.8292
3149			sphingomyelin (d18:2/23:0, d18:1/23:1, d17:1/24:1)*	LC/MS pos late	52435		HMDB0240634 HMDB0011696 HMDB0240614	134757653					1.04	0.94	0.73	0.94	0.75	1.04	0.8	0.89	1.07	1.03	1.11	1.16	0.97	1.19				1.04	0.94	0.75	0.94	0.81	1.04	0.86	0.89	1.11	1.08	1.04	1.07		0.001	0.0004	0.7927	0.3213	0.7211	0.7142	0.7835
3150			sphingomyelin (d18:1/24:1, d18:2/24:0)*	LC/MS pos late	47153		HMDB0012107	44260126					0.86	0.75	0.73	1.12	0.86	1.29	0.69	0.92	1.02	0.7	1.19	1.73	0.96	1.22				0.86	0.75	0.73	1.12	0.98	1.29	0.76	0.92	1.14	0.77	1.06	1.56		0.0767	0.0221	0.2934	0.1813	0.9067	0.7284	0.5725
3151			sphingomyelin (d18:2/24:1, d18:1/24:2)*	LC/MS pos late	52437		HMDB0240636 HMDB0240615	85336023					1.09	0.97	0.73	0.84	0.7	0.95	0.76	0.86	1.04	1.01	1.03	1.06	0.92	1.07				1.09	0.97	0.77	0.84	0.74	0.95	0.82	0.86	1.05	1.03	0.97	0.99		1.8738e-06	1.1409e-06	0.6055	0.2698	0.4511	0.6256	0.3315
3152			sphingomyelin (d18:1/25:0, d19:0/24:1, d20:1/23:0, d19:1/24:0)*	LC/MS pos late	57478		HMDB0240671 HMDB0240675 HMDB0240673 HMDB0240674						1.17	0.94	0.56	0.6	0.64	0.75	1.01	1.07	1.33	1.71	1.01	0.79	0.7	1.35				1.17	0.94	0.55	0.6	0.66	0.75	1.11	1.07	1.4	1.9	0.98	0.72		0.0446	0.0133	0.0975	0.1011	0.1081	0.3338	0.453
3155		Ceramide PEs	palmitoyl-sphingosine-phosphoethanolamine (d18:1/16:0)	LC/MS pos late	62984								1.22	0.89	1.05	0.74	0.86	1.02	1.11	1.09	1	0.94	0.93	1	0.9	0.94				1.22	0.89	1.11	0.74	0.89	1.02	1.2	1.09	0.98	0.96	0.9	0.92		0.7149	0.1664	0.0355	0.0534	0.2724	0.5048	0.0532
3180		Sphingosines	sphingosine	LC/MS pos late	17747	C00319	HMDB0000252	5280335					1.28	1.22	0.84	0.96	0.98	1.01	0.89	1.07	1.51	1.3	1.04	1.21	1.23	1.57				1.28	1.22	0.86	0.96	1.03	1.01	0.96	1.07	1.54	1.37	0.99	1.12		0.2296	0.0601	0.0002	0.001	0.3852	0.59	0.0224
3196		Mevalonate Metabolism	3-hydroxy-3-methylglutarate	LC/MS polar	531	C03761	HMDB0000355	1662;5459993					0.93	1.06	1.18	1	1.21	0.88	1.12	1.31	0.96	1.01	1.08	1.03	0.93	1.04				0.93	1.06	1.26	1	1.29	0.88	1.2	1.31	0.95	1.01	1.02	0.96		0.0006	0.0002	0.7059	0.2996	0.6118	0.6865	0.5146
3212		Sterol	desmosterol	LC/MS pos late	6065	C01802	HMDB0002719	439577					1.88	1.13	1.11	0.82	0.9	1.35	1.09	1.1	1.53	1.11	0.99	1.36	1.53	1.52				1.88	1.13	1.13	0.82	0.95	1.35	1.17	1.1	1.58	1.17	0.94	1.27		0.4938	0.1203	5.9225e-05	0.0004	0.6692	0.7044	0.0003
3213			cholesterol	LC/MS pos late	63	C00187	HMDB0000067	6432564;11025495;5997					0.98	0.97	1.02	0.9	1.14	0.91	1.19	1.38	1.1	1.13	1.08	1.05	0.88	1.19				0.98	0.97	1.06	0.9	1.22	0.91	1.27	1.38	1.13	1.16	1.02	0.99		0.0021	0.0008	0.9396	0.3565	0.1678	0.4085	0.8589
3214			cholesterol sulfate	LC/MS polar	35324	C18043	HMDB00653 HMDB0000653	65076					1.03	1	1.02	0.87	0.98	0.9	0.99	1.23	0.99	0.96	1.09	1.12	0.9	1.08				1.03	1	1.07	0.87	1.04	0.9	1.05	1.23	1	0.98	1.03	1.05		0.3971	0.0983	0.9468	0.3569	0.2584	0.497	0.701
3216			7-dehydrocholesterol	LC/MS pos late	1099	C01164	HMDB0000032	439423					1	0.82	0.8	0.74	0.72	0.9	0.74	0.87	0.89	0.76	0.89	1.05	0.74	0.8				1	0.82	0.82	0.74	0.74	0.9	0.78	0.87	0.9	0.79	0.87	1		0.0007	0.0003	0.0177	0.0331	0.7332	0.716	0.9631
3240			4-cholesten-3-one	LC/MS pos late	38125	C00599	HMDB0000921	91477					0.79	0.91	0.52	0.95	0.76	0.82	0.73	0.9	1.16	1.29	1.12	1.01	0.74	1.3				0.79	0.91	0.53	0.95	0.78	0.82	0.74	0.9	1.15	1.26	1.1	1		0.0034	0.0012	0.8895	0.3446	0.2371	0.4738	0.2182
3262			7-hydroxycholesterol (alpha or beta)	LC/MS pos late	47890	C15610	HMDB0006119	15571093					1.1	1	0.95	0.61	0.78	0.67	0.97	1.3	0.91	1.02	1	0.9	0.67	0.91				1.1	1	1.03	0.61	0.81	0.67	1.09	1.3	0.87	1.06	0.97	0.8		0.7754	0.1774	0.1228	0.1154	0.2161	0.4642	0.6001
3475		Primary Bile Acid Metabolism	glycocholate	LC/MS neg	18476	C01921	HMDB0000138	10140					1	0.77	3.35	1.33	2.44	1.73	3.04	1.55	0.73	0.7	0.84	0.88	1.34	0.62				1	0.77	3.71	1.33	2.67	1.73	3.26	1.55	0.72	0.68	0.77	0.82		9.841e-12	1.4077e-11	0.2416	0.1604	0.0797	0.2902	0.9995
3476			taurocholate	LC/MS neg	18497	C05122	HMDB0000036	46783527;6675					1.18	0.81	2.88	1.16	1.7	1.68	2.52	1.25	0.7	0.71	0.85	0.84	1.36	0.59				1.18	0.81	3.23	1.16	1.87	1.68	2.66	1.25	0.68	0.67	0.78	0.79		1.24e-07	9.2743e-08	0.4706	0.2343	0.0639	0.2624	0.4545
3482			glycochenodeoxycholate	LC/MS neg	32346	C05466	HMDB0000637	12544					1.17	0.84	2.69	1.17	1.92	1.63	2.49	1.45	0.83	0.78	0.89	0.95	1.37	0.74				1.17	0.84	2.98	1.17	2.12	1.63	2.65	1.45	0.83	0.75	0.8	0.89		1.4251e-10	1.6933e-10	0.2897	0.1803	0.0907	0.3039	0.3116
3483			taurochenodeoxycholate	LC/MS neg	18494	C05465	HMDB0000951	387316					1.09	0.77	2.25	1.22	1.69	1.72	2.37	1.17	0.82	0.82	0.85	0.85	1.33	0.69				1.09	0.77	2.49	1.22	1.87	1.72	2.53	1.17	0.82	0.79	0.77	0.8		3.6403e-07	2.4948e-07	0.4887	0.2385	0.0536	0.2437	0.5236
3508		Secondary Bile Acid Metabolism	glycodeoxycholate	LC/MS neg	18477	C05464	HMDB00631	3035026					1.43	0.84	3.55	1.16	2.28	1.96	3.86	1.76	0.92	0.92	0.89	0.89	1.65	0.82				1.43	0.84	3.93	1.16	2.49	1.96	4.11	1.76	0.9	0.88	0.82	0.84		1.609e-12	2.522e-12	0.1564	0.13	0.0181	0.1356	0.0725
3510			taurodeoxycholate	LC/MS neg	12261	C05463	HMDB0000896	2733768					1.67	1.15	3.88	1.04	1.83	1.52	2.75	1.57	0.79	0.81	0.9	0.87	1.75	0.71				1.67	1.15	4.3	1.04	2.01	1.52	2.96	1.57	0.78	0.79	0.82	0.81		3.1366e-10	3.5012e-10	0.5655	0.2594	0.0317	0.2016	0.0135
4135	Nucleotide	Purine Metabolism, (Hypo)Xanthine/Inosine containing	AICA ribonucleotide	LC/MS pos early	38325	C04677	HMDB0001517	65110					0.31	1.44	0.14	2.29	0.33	0.5	0.2	0.1	0.73	1.99	0.7	0.26	0.72	0.51				0.31	1.44	0.15	2.29	0.35	0.5	0.21	0.1	0.74	2.04	0.66	0.24		0	0	5.37e-09	1.2249e-07	0.007	0.0617	1.5886e-05
4139			inosine 5'-monophosphate (IMP)	LC/MS polar	2133	C00130	HMDB0000175	8582					0.28	2	2.77	4.01	7.34	0.56	1.7	2.62	0.74	1.23	1.43	0.86	1.12	1.06				0.28	2	2.88	4.01	7.48	0.56	1.85	2.62	0.72	1.29	1.4	0.79		3.8518e-08	3.1183e-08	2.2291e-05	0.0002	0.0038	0.0383	0.0003
4140			inosine	LC/MS pos early	1123	C00294	HMDB0000195	6021					1.18	0.77	0.63	0.85	0.71	1.32	0.7	0.74	1.33	0.85	0.89	1.39	1.01	1.19				1.18	0.77	0.66	0.85	0.77	1.32	0.75	0.74	1.37	0.86	0.83	1.31		4.6942e-08	3.7386e-08	2.2837e-05	0.0002	0.8463	0.7184	0.1031
4141			hypoxanthine	LC/MS neg	3127	C00262	HMDB0000157	790;135398638					1.13	0.84	0.76	0.8	0.72	1.08	0.82	0.88	1.06	0.9	0.98	1.16	0.91	1.05				1.13	0.84	0.8	0.8	0.76	1.08	0.88	0.88	1.07	0.92	0.93	1.08		4.628e-06	2.6227e-06	0.0067	0.0169	0.4201	0.6012	0.1739
4142			xanthine	LC/MS neg	3147	C00385	HMDB0000292	1188					0.99	0.9	2.22	0.96	2.29	1.05	2.45	2.45	1.02	0.99	1.02	1.05	0.95	1.05				0.99	0.9	2.29	0.96	2.39	1.05	2.66	2.45	1.03	1.04	0.98	0.97		0	0	0.7903	0.3213	0.9084	0.7284	0.9639
4143			xanthosine 5'-monophosphate (xmp)	LC/MS neg	12024	C00655	HMDB0001554	73323					0.43	0.31	0.11	0.54	0.22	0.76	0.31	0.32	0.83	0.84	0.8	0.78	0.23	0.66				0.43	0.31	0.12	0.54	0.23	0.76	0.34	0.32	0.82	0.86	0.76	0.72		0	0	6.938e-12	4.3517e-10	1.8867e-06	0.0001	5.2594e-08
4144			xanthosine	LC/MS neg	15136	C01762	HMDB0000299	64959					1.32	0.32	0.05	0.17	0.04	0.68	0.15	0.17	1	0.97	0.75	0.78	0.22	0.75				1.32	0.32	0.05	0.17	0.04	0.68	0.16	0.17	0.95	1.02	0.77	0.71		0	0	1.8764e-10	7.8463e-09	1.331e-07	1.6953e-05	0.1462
4147			N1-methylinosine	LC/MS pos early	48351		HMDB0002721	650095					1.07	1.13	1.81	1.05	1.61	0.99	1.54	1.56	0.95	0.96	1.02	1.01	1.12	0.97				1.07	1.13	1.93	1.05	1.74	0.99	1.66	1.56	0.96	0.97	0.94	0.94		3.4528e-10	3.7965e-10	0.9158	0.3524	0.7172	0.7142	0.4696
4148			2'-deoxyinosine	LC/MS neg	15076	C05512	HMDB0000071	135398593					1.18	1.05	0.43	0.69	0.42	0.78	0.54	0.67	1.14	1.3	1.12	0.98	0.82	1.27				1.18	1.05	0.44	0.69	0.43	0.78	0.58	0.67	1.15	1.37	1.08	0.9		1.2e-14	2.7e-14	0.1348	0.1206	0.026	0.1717	0.1747
4152			urate	LC/MS neg	1604	C00366	HMDB0000289	1175					1.17	1.2	1.13	0.85	0.84	0.83	0.92	0.84	0.87	0.97	0.85	0.76	1	0.74				1.17	1.2	1.23	0.85	0.88	0.83	0.98	0.84	0.84	0.95	0.81	0.71		0.2905	0.074	0.1865	0.1402	0.5502	0.6622	0.2811
4154			allantoin	LC/MS polar	1107	C02350 C02348 C01551	HMDB0000462	204;439714;439713					0.95	0.93	1.06	0.99	1.03	1.01	0.99	0.96	0.92	0.87	0.93	0.98	0.95	0.86				0.95	0.93	1.14	0.99	1.1	1.01	1.06	0.96	0.92	0.87	0.86	0.92		0.986	0.2152	0.4186	0.2212	0.9406	0.7395	0.6643
4155			allantoic acid	LC/MS polar	33434	C00499	HMDB0001209	203					1.08	0.83	2.11	1.27	1.54	1.64	1.52	0.94	0.79	0.6	0.77	1.01	1.36	0.6				1.08	0.83	2.32	1.27	1.74	1.64	1.62	0.94	0.81	0.58	0.68	0.95		0.007	0.0024	0.1952	0.1445	0.1155	0.3455	0.9141
4158		Purine Metabolism, Adenine containing	adenosine 5'-triphosphate (ATP)	LC/MS neg	33449	C00002	HMDB0000538	5957					1.15	0.58	0.33	0.44	0.29	0.87	0.57	0.66	1	1	1	1	0.5	1				1.15	0.58	0.33	0.44	0.29	0.87	0.57	0.66	1	1	1	1		4e-15	8e-15	4.4954e-05	0.0003	4.4954e-05	0.0013	0.2709
4159			adenosine 5'-diphosphate (ADP)	LC/MS neg	3108	C00008	HMDB0001341	6022					0.62	1.13	0.32	1.08	0.46	0.59	0.28	0.39	0.92	1	0.89	0.82	0.67	0.82				0.62	1.13	0.35	1.08	0.49	0.59	0.29	0.39	0.88	0.95	0.84	0.78		5.4373e-11	7.0275e-11	0.0582	0.0753	0.3354	0.5562	0.0611
4160			adenosine 5'-monophosphate (AMP)	LC/MS pos early	32342	C00020	HMDB0000045	6083					0.26	1.75	1.94	2.83	6.36	0.43	1.27	2.3	0.86	1.14	1.03	0.77	0.75	0.88				0.26	1.75	2.06	2.83	6.75	0.43	1.35	2.3	0.86	1.14	0.97	0.73		3.832e-09	3.66e-09	2.4361e-06	2.6575e-05	0.0002	0.0038	5.2074e-06
4162			adenosine 2'-monophosphate (2'-AMP)	LC/MS neg	36815	C00946	HMDB0011617	94136					1.46	2.32	5.8	1.3	4.34	0.82	3.24	3.88	1.1	1.29	1.16	0.98	1.9	1.27				1.46	2.32	5.83	1.3	4.4	0.82	3.58	3.88	1.1	1.42	1.14	0.89		4.2e-14	8.8e-14	0.032	0.0496	0.4063	0.5948	0.057
4163			adenosine 3',5'-cyclic monophosphate (cAMP)	LC/MS neg	2831	C00575	HMDB0000058	6076					0.9	0.99	0.96	0.89	1.09	0.81	1.07	1.24	1.03	1.1	1.01	0.94	0.8	1.04				0.9	0.99	1.01	0.89	1.16	0.81	1.14	1.24	1.03	1.12	0.95	0.88		0.0656	0.0191	0.1609	0.1315	0.1892	0.4401	0.2361
4166			adenylosuccinate	LC/MS neg	57838	C03794	HMDB0000536	440122					0.19	1.74	1.13	2.99	4.76	0.32	0.75	1.57	0.79	1.16	0.99	0.68	0.56	0.78				0.19	1.74	1.2	2.99	4.99	0.32	0.8	1.57	0.78	1.15	0.94	0.64		0.0002	8.9318e-05	1.3281e-06	1.5868e-05	0.0002	0.0044	4.5849e-06
4167			adenosine	LC/MS pos early	555	C00212	HMDB0000050	60961					0.54	0.69	0.96	1.57	1.56	1.23	0.53	0.79	0.88	0.38	0.79	1.82	0.85	0.7				0.54	0.69	1.07	1.57	1.77	1.23	0.57	0.79	0.9	0.37	0.7	1.69		0.6529	0.1542	0.0432	0.0629	0.1325	0.3661	0.013
4168			adenine	LC/MS pos early	554	C00147	HMDB0000034	190					1.01	1.21	0.87	1.02	0.8	0.85	0.85	0.75	0.93	1.18	0.95	0.75	1.03	0.88				1.01	1.21	0.92	1.02	0.85	0.85	0.9	0.75	0.94	1.19	0.9	0.71		0.05	0.0148	0.143	0.1246	0.7713	0.718	0.8038
4174			N1-methyladenosine	LC/MS pos early	15650	C02494	HMDB0003331	27476					1.23	1.07	0.59	0.84	0.49	0.96	0.58	0.56	1.04	1.06	0.95	0.93	1.03	0.99				1.23	1.07	0.62	0.84	0.52	0.96	0.63	0.56	1.02	1.09	0.91	0.85		8.349e-12	1.2061e-11	0.4294	0.2236	0.7231	0.7142	0.0895
4175			N6-methyladenosine	LC/MS pos early	37114		HMDB0004044	102175					1.29	0.56	0.23	0.63	0.19	1.43	0.41	0.29	1.04	1	0.96	1	0.81	1				1.29	0.56	0.23	0.63	0.19	1.43	0.41	0.29	1.05	1	0.95	1		1e-15	2e-15	0.0173	0.0326	0.0337	0.2066	0.0075
4185			N6-carbamoylthreonyladenosine	LC/MS neg	35157		HMDB0041623	161466					1.12	1.09	1.22	0.87	0.98	0.89	1	1.08	0.91	0.9	0.95	0.96	0.98	0.86				1.12	1.09	1.31	0.87	1.04	0.89	1.08	1.08	0.89	0.89	0.9	0.9		0.2757	0.0708	0.5865	0.265	0.5292	0.6622	0.2522
4188			2'-deoxyadenosine 5'-monophosphate	LC/MS neg	46333	C00360	HMDB0000905	12599					0.63	0.96	0.82	1.17	0.99	0.77	0.78	0.91	0.76	0.91	1.07	0.9	0.74	0.82				0.63	0.96	0.87	1.17	1.04	0.77	0.82	0.91	0.75	0.9	1.02	0.85		0.0017	0.0006	2.1757e-06	2.4812e-05	0.2241	0.4682	6.1827e-06
4193			cyclic adenosine diphosphate-ribose	LC/MS polar	45992	C13050		123847					0.99	0.64	0.58	0.58	0.54	0.9	0.84	0.93	0.92	0.92	1	1	0.58	0.92				0.99	0.64	0.59	0.58	0.54	0.9	0.84	0.93	0.91	0.91	1	1		4.5752e-08	3.6636e-08	0.0001	0.0006	0.0009	0.0124	0.8324
4195			N6-succinyladenosine	LC/MS neg	48130		HMDB0000912	165243					0.85	1.7	1.02	1.24	1.03	0.62	0.62	0.9	0.86	1.04	1.07	0.89	1.05	0.92				0.85	1.7	1.02	1.24	1.01	0.62	0.7	0.9	0.84	1.17	1.1	0.79		0.6798	0.16	0.2944	0.1815	0.6636	0.7044	0.5605
4198		Purine Metabolism, Guanine containing	guanosine 5'-monophosphate (5'-GMP)	LC/MS pos early	2849	C00144	HMDB0001397	6804					0.32	1.54	1.59	2.66	4.21	0.56	1.11	1.66	0.86	1.08	1.05	0.83	0.86	0.9				0.32	1.54	1.68	2.66	4.39	0.56	1.19	1.66	0.85	1.1	1.01	0.78		5.0187e-06	2.8332e-06	7.1294e-05	0.0004	0.0011	0.0134	3.5838e-05
4199			guanosine 3'-monophosphate (3'-GMP)	LC/MS neg	39786			135398727					0.27	1.81	1.66	2.87	5.87	0.43	1.15	1.87	0.96	1.25	0.92	0.7	0.78	0.88				0.27	1.81	1.77	2.87	6.16	0.43	1.22	1.87	0.94	1.24	0.87	0.66		3.5006e-07	2.4215e-07	2.9468e-05	0.0002	0.0008	0.0123	0.0003
4203			guanosine	LC/MS neg	1573	C00387	HMDB0000133	6802					1.32	0.75	0.53	0.75	0.52	1.33	0.6	0.61	1.3	0.84	0.88	1.35	1	1.14				1.32	0.75	0.56	0.75	0.56	1.33	0.64	0.61	1.32	0.85	0.82	1.27		7.9e-14	1.58e-13	4.8809e-07	6.4453e-06	0.6423	0.6962	0.0054
4204			guanine	LC/MS pos early	32352	C00242	HMDB0000132	135398634					1.42	0.73	0.38	0.62	0.35	1.21	0.48	0.49	1.3	0.92	0.87	1.23	0.88	1.13				1.42	0.73	0.4	0.62	0.37	1.21	0.51	0.49	1.29	0.92	0.83	1.17		0	0	2.7586e-08	5.2686e-07	0.0363	0.2105	0.0004
4207			7-methylguanine	LC/MS pos early	35114	C02242	HMDB0000897	135398679					1.23	1.1	1.11	0.93	0.86	1.04	1.02	0.81	0.95	1.01	0.88	0.82	1.14	0.83				1.23	1.1	1.22	0.93	0.9	1.04	1.09	0.81	0.91	0.98	0.83	0.77		0.2728	0.0704	0.5606	0.2586	0.4239	0.6033	0.1093
4213			N2,N2-dimethylguanosine	LC/MS pos early	35137		HMDB0004824	135501639					0.96	1.22	0.47	1	0.5	0.78	0.44	0.54	1.02	1.14	1.08	0.97	0.95	1.1				0.96	1.22	0.5	1	0.53	0.78	0.47	0.54	1.02	1.15	1.01	0.9		1.22e-13	2.39e-13	0.2697	0.1709	0.6937	0.7125	0.7269
4221			2'-deoxyguanosine	LC/MS neg	1411	C00330	HMDB0000085	135398592					1.28	0.93	0.26	0.61	0.23	0.84	0.31	0.4	1.12	1.12	1.09	1.09	0.78	1.23				1.28	0.93	0.27	0.61	0.24	0.84	0.33	0.4	1.13	1.16	1.05	1.02		0	0	0.144	0.1246	0.0242	0.1625	0.0751
4226		Pyrimidine Metabolism, Orotate containing	N-carbamoylaspartate	LC/MS pos early	1594	C00438	HMDB0000828	93072					0.22	0.07	0.72	0.08	1.01	0.24	4.47	25.22	0.31	0.45	1.98	1.36	0.02	0.62				0.22	0.07	0.81	0.08	1.03	0.24	4.9	25.22	0.28	0.44	1.93	1.24		2.67e-05	1.3612e-05	3.5803e-05	0.0002	0.0013	0.0159	0.0064
4227			dihydroorotate	LC/MS polar	601	C00337	HMDB03349	648					0.21	0.11	0.6	0.13	1.06	0.24	2.62	15.51	0.36	0.49	1.88	1.4	0.03	0.69				0.21	0.11	0.68	0.13	1.12	0.24	2.89	15.51	0.34	0.48	1.79	1.27		0.0006	0.0002	2.8399e-05	0.0002	0.0019	0.0223	0.0007
4228			orotate	LC/MS polar	1505	C00295	HMDB0000226	967					0.65	0.57	0.9	0.5	0.99	0.57	1.26	2.39	0.71	0.8	1.21	1.08	0.33	0.86				0.65	0.57	0.97	0.5	1.04	0.57	1.36	2.39	0.7	0.8	1.15	1		0.0076	0.0026	0.0002	0.0009	0.0032	0.0321	0.0178
4230			orotidine	LC/MS polar	35172		HMDB0000788	92751					0.78	1.13	0.57	1.1	0.72	0.76	0.58	0.66	0.99	1.16	1	0.86	0.86	0.99				0.78	1.13	0.59	1.1	0.77	0.76	0.62	0.66	1.01	1.18	0.94	0.8		2.49e-13	4.48e-13	0.001	0.0033	0.2064	0.4531	0.008
4233		Pyrimidine Metabolism, Uracil containing	uridine 5'-triphosphate (UTP)	LC/MS neg	33448	C00075	HMDB0000285	6133					2.27	1.23	0.28	0.5	0.12	0.93	0.23	0.25	1	1	1	1	1.14	1				2.27	1.23	0.28	0.5	0.12	0.93	0.23	0.25	1	1	1	1		0	0	0.0081	0.019	0.0081	0.0665	9.1359e-06
4234			uridine 5'-diphosphate (UDP)	LC/MS neg	5345	C00015	HMDB0000295	6031					0.45	0.86	0.11	1.12	0.15	0.59	0.08	0.19	0.6	0.66	1.45	1.34	0.5	0.88				0.45	0.86	0.12	1.12	0.15	0.59	0.09	0.19	0.56	0.62	1.46	1.31		0	0	0.066	0.0808	0.2202	0.4655	0.0219
4235			uridine 5'-monophosphate (UMP)	LC/MS polar	2856	C00105	HMDB0000288	6030					0.38	1.59	1.02	2.37	2.54	0.56	0.67	1.09	0.93	1.05	1.01	0.9	0.89	0.95				0.38	1.59	1.09	2.37	2.73	0.56	0.71	1.09	0.94	1.04	0.94	0.86		0.0437	0.0131	0.0001	0.0007	0.0009	0.0123	7.7182e-05
4237			uridine 3'-monophosphate (3'-UMP)	LC/MS polar	39764	C01368	HMDB0060282	101543					0.73	1.34	0.57	1.18	0.78	0.65	0.43	0.66	1	1	1	1	0.87	1				0.73	1.34	0.57	1.18	0.78	0.65	0.43	0.66	1	1	1	1		0.001	0.0004	0.5266	0.2488	0.5266	0.6622	0.3851
4239			uridine-2',3'-cyclic monophosphate	LC/MS neg	37137	C02355	HMDB0011640	439715					1.54	1.05	2.13	0.81	2.35	1.19	2.41	2.77	1.7	1.2	0.96	1.36	1.25	1.63				1.54	1.05	2.23	0.81	2.26	1.19	2.7	2.77	1.56	1.27	0.99	1.22		5.6081e-09	5.1323e-09	0.0211	0.037	0.5669	0.6686	0.168
4240			uridine	LC/MS neg	606	C00299	HMDB0000296	6029					1.11	0.94	0.81	0.82	0.73	0.98	0.88	0.94	1.01	1.02	1.06	1.05	0.91	1.07				1.11	0.94	0.84	0.82	0.78	0.98	0.95	0.94	1.03	1.05	1	0.97		9.5133e-05	4.464e-05	0.5242	0.2486	0.1794	0.4211	0.2094
4241			uracil	LC/MS polar	605	C00106	HMDB0000300	1174					1.22	0.88	0.54	0.79	0.52	1.09	0.72	0.65	1.16	1.16	0.99	0.99	0.95	1.15				1.22	0.88	0.56	0.79	0.54	1.09	0.78	0.65	1.16	1.22	0.95	0.91		1.3847e-10	1.6587e-10	0.1235	0.1154	0.2499	0.4905	0.096
4242			pseudouridine	LC/MS neg	33442	C02067	HMDB0000767	15047					1.11	1.25	0.92	0.88	0.82	0.78	0.85	0.9	0.99	1.15	0.97	0.83	0.98	0.96				1.11	1.25	0.99	0.88	0.86	0.78	0.9	0.9	0.97	1.13	0.92	0.79		0.0794	0.0229	0.1654	0.1315	0.9547	0.7395	0.5371
4243			5,6-dihydrouridine	LC/MS neg	61833		HMDB0000497	94312					1.02	1.28	1.2	1.16	0.99	0.92	0.88	0.9	0.84	0.94	1.05	0.94	1.18	0.89				1.02	1.28	1.28	1.16	1.03	0.92	0.96	0.9	0.82	0.96	1.01	0.86		0.9525	0.2095	0.4996	0.2414	0.4167	0.598	0.8701
4244			2'-O-methyluridine	LC/MS neg	57655		HMDB0240328	102212					0.91	1.04	0.89	0.96	0.87	0.84	0.95	0.99	0.89	1.11	1.09	0.87	0.88	0.97				0.91	1.04	0.96	0.96	0.91	0.84	1.02	0.99	0.86	1.11	1.05	0.82		0.1917	0.051	0.1436	0.1246	0.7793	0.718	0.3354
4245			5-methyluridine (ribothymidine)	LC/MS neg	35136		HMDB0000884	445408					0.86	1	0.79	0.92	0.76	0.79	0.92	0.92	0.82	1.17	1.12	0.79	0.79	0.92				0.86	1	0.81	0.92	0.76	0.79	1	0.92	0.8	1.23	1.12	0.73		0.0107	0.0036	0.0266	0.044	0.5762	0.6703	0.2906
4256			2'-deoxyuridine	LC/MS neg	52602	C00526	HMDB0000012	13712					1.74	0.79	0.23	0.39	0.16	0.85	0.33	0.37	1.17	1.13	0.92	0.95	0.67	1.08				1.74	0.79	0.24	0.39	0.16	0.85	0.35	0.37	1.16	1.14	0.88	0.9		0	0	2.7239e-06	2.8476e-05	4.17e-05	0.0013	3.3637e-05
4259			3-ureidopropionate	LC/MS pos early	3155	C02642	HMDB0000026	111					1.11	0.94	1.51	0.83	1.17	0.98	1.34	1.4	0.86	0.83	0.99	1.02	0.92	0.85				1.11	0.94	1.63	0.83	1.24	0.98	1.45	1.4	0.85	0.83	0.93	0.95		3.8721e-05	1.9274e-05	0.326	0.192	0.5196	0.6585	0.3814
4265			3-(3-amino-3-carboxypropyl)uridine*	LC/MS neg	62924			171198					1.01	1.02	1.56	0.93	1.49	0.91	1.56	1.61	0.97	1.03	1	0.94	0.94	0.97				1.01	1.02	1.65	0.93	1.59	0.91	1.67	1.61	0.97	1.04	0.94	0.88		3.0943e-11	4.1447e-11	0.7953	0.3213	0.9244	0.7358	0.858
4267		Pyrimidine Metabolism, Cytidine containing	cytidine diphosphate	LC/MS neg	2841	C00112	HMDB0001546	6132					0.25	0.24	0.21	0.84	0.84	0.86	0.86	1	1	1	1	1	0.21	1				0.25	0.24	0.21	0.84	0.84	0.86	0.86	1	1	1	1	1		0.0003	0.0001	4.105e-05	0.0003	4.105e-05	0.0013	3.1817e-07
4268			cytidine 5'-monophosphate (5'-CMP)	LC/MS pos early	2372	C00055	HMDB0000095	6131					0.62	1.1	0.58	1.47	1.04	0.82	0.45	0.6	1.1	0.84	0.84	1.1	0.9	0.93				0.62	1.1	0.61	1.47	1.12	0.82	0.47	0.6	1.13	0.85	0.78	1.04		1.5695e-06	9.7167e-07	0.158	0.1304	0.001	0.0128	0.0008
4272			cytidine	LC/MS pos early	514	C00475	HMDB0000089	6175					1.2	1.09	0.82	0.81	0.75	0.89	0.93	0.94	1.09	1.24	1.02	0.89	0.97	1.11				1.2	1.09	0.86	0.81	0.78	0.89	1.01	0.94	1.09	1.28	0.98	0.83		0.0006	0.0002	0.0556	0.0729	0.1962	0.4502	0.0377
4273			cytosine	LC/MS pos early	573	C00380	HMDB0000630	597					1.57	1.5	1.29	0.89	0.91	0.93	0.82	1.04	1.11	0.95	1.02	1.18	1.39	1.13				1.57	1.5	1.41	0.89	0.97	0.93	0.84	1.04	1.08	0.89	0.95	1.15		0.9562	0.21	0.0517	0.0708	0.4349	0.616	0.0075
4275			3-methylcytidine	LC/MS pos early	35132		HMDB0240577	14237477					1.78	0.65	0.66	0.53	0.38	1.46	0.85	0.67	1.02	0.85	0.95	1.15	0.95	0.97				1.78	0.65	0.71	0.53	0.4	1.46	0.9	0.67	1.01	0.83	0.89	1.09		8.3536e-08	6.4781e-08	1.6828e-05	0.0001	0.002	0.0226	5.4422e-05
4276			5-methylcytidine	LC/MS pos early	22119		HMDB0000982	92918					0.93	1.25	0.52	1.01	0.51	0.75	0.43	0.53	0.92	1.03	1.04	0.93	0.94	0.95				0.93	1.25	0.55	1.01	0.54	0.75	0.47	0.53	0.91	1.05	0.99	0.85		4.12e-13	7.14e-13	0.2031	0.1473	0.5874	0.6725	0.5821
4283			2'-deoxycytidine	LC/MS pos early	15949	C00881	HMDB0000014	13711					0.97	0.95	1.61	0.89	1.52	0.91	1.79	1.71	0.92	1.05	1	0.87	0.87	0.92				0.97	0.95	1.73	0.89	1.63	0.91	1.91	1.71	0.91	1.05	0.94	0.82		5.96e-12	8.782e-12	0.3843	0.2131	0.6193	0.6896	0.8174
4285			2'-O-methylcytidine	LC/MS pos early	57554			150971					0.99	1.06	1.18	1	1.09	0.94	1.07	1.08	0.92	0.96	0.99	0.95	0.99	0.91				0.99	1.06	1.28	1	1.17	0.94	1.14	1.08	0.91	0.95	0.93	0.89		0.0906	0.026	0.8571	0.336	0.9272	0.7358	0.9802
4291		Pyrimidine Metabolism, Thymine containing	thymidine 5'-monophosphate	LC/MS neg	12023	C00364	HMDB0001227	9700					0.34	1.17	0.74	1.92	1.9	0.56	0.71	0.98	0.88	1.12	0.99	0.78	0.66	0.87				0.34	1.17	0.79	1.92	1.99	0.56	0.75	0.98	0.86	1.1	0.95	0.74		0.5129	0.124	1.5523e-05	0.0001	0.0009	0.0123	6.9985e-07
4295			thymidine	LC/MS neg	2183	C00214	HMDB0000273	5789					1.06	0.47	0.2	0.36	0.17	0.81	0.37	0.4	0.94	0.88	0.83	0.89	0.38	0.78				1.06	0.47	0.2	0.36	0.18	0.81	0.39	0.4	0.95	0.9	0.79	0.83		0	0	1.6673e-07	2.3241e-06	0.0003	0.0048	0.3675
4298			thymine	LC/MS neg	604	C00178	HMDB0000262	1135					1.18	1.25	0.71	0.9	0.59	0.85	0.68	0.71	0.98	1.21	1.1	0.89	1.06	1.07				1.18	1.25	0.74	0.9	0.61	0.85	0.74	0.71	0.98	1.26	1.04	0.82		8.4492e-09	7.545e-09	0.0903	0.0968	0.5789	0.6703	0.1336
4301			5,6-dihydrothymine	LC/MS neg	1418	C00906	HMDB0000079	93556					1.29	0.68	0.33	0.6	0.47	1.13	0.51	0.42	1.86	1.05	0.54	0.95	0.77	1				1.29	0.68	0.34	0.6	0.5	1.13	0.48	0.42	1.9	0.96	0.5	1		2.004e-07	1.4617e-07	0.0122	0.0258	0.6275	0.6922	0.2865
4305		Purine and Pyrimidine Metabolism	methylphosphate	LC/MS pos early	37070		HMDB61711	13130					0.95	0.61	0.92	0.81	0.93	1.26	0.79	0.99	0.96	0.53	0.87	1.58	0.77	0.83				0.95	0.61	0.98	0.81	1.05	1.26	0.85	0.99	1.02	0.53	0.77	1.48		0.1387	0.0383	0.0004	0.0017	0.8656	0.7194	0.8672
4308		Dinucleotide	(3'-5')-adenylyluridine	LC/MS neg	52740			145459093					3.43	1.55	6.6	0.9	1.81	1.99	3.9	1.88	0.94	0.91	0.93	0.96	3.07	0.88				3.43	1.55	6.92	0.9	1.85	1.99	4.31	1.88	0.92	0.96	0.91	0.87		3.1e-14	6.7e-14	7.9569e-05	0.0004	2.0169e-05	0.0008	5.2117e-08
4313			(3'-5')-cytidylyluridine*	LC/MS neg	62399			145459097					2.03	1.19	3.86	0.82	1.88	1.39	3.04	2.54	0.99	0.94	1.1	1.16	1.65	1.09				2.03	1.19	4.18	0.82	1.88	1.39	3.42	2.54	0.91	0.97	1.1	1.03		4.1145e-09	3.8614e-09	0.1088	0.107	0.4043	0.5936	0.0111
4317			(3'-5')-uridylylcytidine*	LC/MS neg	62398			145459103					1.11	2.39	0.6	0.94	0.54	0.44	0.25	0.57	1	1	1	1	1.05	1				1.11	2.39	0.6	0.94	0.54	0.44	0.25	0.57	1	1	1	1		6.2098e-06	3.4789e-06	0.0862	0.0949	0.0862	0.2968	0.4686
4319			(3'-5')-uridylyluridine	LC/MS neg	52741			145459105					1.84	1.46	1.39	0.93	0.83	1.17	1.01	0.88	1.1	1.06	0.99	1.02	1.71	1.08				1.84	1.46	1.41	0.93	0.84	1.17	1.12	0.88	1.09	1.16	0.97	0.92		0.8484	0.1911	0.0614	0.0773	0.28	0.5112	0.0033
4320			(3'-5')-uridylyladenosine	LC/MS neg	52739			92951					1.79	1.31	0.63	0.77	0.45	1.06	0.64	0.51	1.28	1.34	0.87	0.83	1.39	1.12				1.79	1.31	0.71	0.77	0.46	1.06	0.74	0.51	1.15	1.36	0.86	0.73		1.086e-05	5.9046e-06	0.0767	0.0879	0.9313	0.7369	0.0446
4321	Cofactors and Vitamins	Nicotinate and Nicotinamide Metabolism	quinolinate	LC/MS polar	1899	C03722	HMDB0000232	1066					0.86	1.12	1.14	1.01	1.26	0.78	1.26	1.27	0.96	1.24	1.02	0.78	0.87	0.97				0.86	1.12	1.19	1.01	1.37	0.78	1.35	1.27	0.99	1.27	0.94	0.73		0.0003	0.0001	0.0043	0.0117	0.8665	0.7194	0.214
4325			nicotinamide	LC/MS pos early	594	C00153	HMDB0001406	936					1.07	0.94	0.88	0.78	0.85	0.88	0.94	1.01	1.03	1.01	0.92	0.94	0.83	0.95				1.07	0.94	0.93	0.78	0.89	0.88	1.01	1.01	1.02	1.03	0.88	0.88		0.0566	0.0166	0.062	0.0774	0.4834	0.6467	0.4098
4327			nicotinamide ribonucleotide (NMN)	LC/MS pos early	22152	C00455	HMDB0000229	14180					0.68	0.29	0.31	0.42	0.42	1	1	1	0.93	0.93	1	1	0.29	0.93				0.68	0.29	0.31	0.42	0.42	1	1	1	0.92	0.92	1	1		3.6875e-10	3.9504e-10	5.7155e-10	2.0486e-08	4.5126e-09	1.1495e-06	0.0011
4328			nicotinamide riboside	LC/MS pos early	33013	C03150	HMDB0000855	439924					1.62	0.56	0.65	0.39	0.37	1.15	0.86	0.83	0.93	0.73	0.88	1.11	0.64	0.81				1.62	0.56	0.69	0.39	0.4	1.15	0.91	0.83	0.94	0.73	0.81	1.04		5.4248e-08	4.2743e-08	4.2768e-08	7.1537e-07	0.0001	0.003	0.0003
4329			nicotinamide adenine dinucleotide (NAD+)	LC/MS neg	5278	C00003		5892					0.69	0.37	0.39	0.48	0.54	0.88	0.91	0.96	0.97	0.88	0.85	0.93	0.33	0.82				0.69	0.37	0.41	0.48	0.58	0.88	0.97	0.96	0.98	0.89	0.8	0.87		1.058e-12	1.767e-12	6.7e-14	1.6887e-11	1.1993e-09	6.1096e-07	7.1126e-05
4343			trigonelline (N'-methylnicotinate)	LC/MS pos early	32401	C01004	HMDB0000875	5570					1.06	0.92	1.11	0.83	0.81	0.95	1.02	0.95	0.78	0.85	0.97	0.89	0.88	0.76				1.06	0.92	1.18	0.83	0.85	0.95	1.08	0.95	0.76	0.84	0.93	0.84		0.8353	0.1891	0.6913	0.2965	0.8488	0.7184	0.8364
4353		Riboflavin Metabolism	riboflavin (vitamin B2)	LC/MS neg	1827	C00255	HMDB0000244	493570					1.09	1.01	1.11	0.86	0.85	0.93	0.99	0.97	0.83	0.89	0.99	0.91	0.94	0.82				1.09	1.01	1.2	0.86	0.88	0.93	1.06	0.97	0.8	0.89	0.95	0.85		0.7248	0.1677	0.6243	0.2753	0.5692	0.6697	0.4733
4354			flavin adenine dinucleotide (FAD)	LC/MS neg	2134	C00016	HMDB0001248	643975					1.08	1	0.98	0.84	0.94	0.9	1.06	1.09	1.03	1.08	0.98	0.93	0.9	1				1.08	1	1.03	0.84	0.98	0.9	1.13	1.09	1.03	1.1	0.93	0.87		0.7951	0.1811	0.3102	0.187	0.5189	0.6585	0.3722
4355			flavin mononucleotide (FMN)	LC/MS neg	15797	C00061	HMDB0001520	643976					1.09	0.83	1.01	0.79	0.82	1.03	1.13	1.04	0.87	0.94	1.01	0.95	0.86	0.89				1.09	0.83	1.08	0.79	0.86	1.03	1.2	1.04	0.87	0.93	0.96	0.89		0.7403	0.1709	0.0797	0.09	0.0721	0.2809	0.3623
4357		Pantothenate and CoA Metabolism	pantoate	LC/MS polar	63061	C00522	HMDB0240389	5289105					0.87	0.94	1.16	0.88	1.15	0.81	1.1	1.13	0.86	0.89	0.87	0.84	0.77	0.75				0.87	0.94	1.24	0.88	1.24	0.81	1.18	1.13	0.87	0.9	0.81	0.78		0.215	0.0567	0.1909	0.1421	0.9941	0.7525	0.3891
4358			pantothenate	LC/MS pos early	1508	C00864	HMDB0000210	6613					0.99	1	1.03	0.89	1	0.88	0.98	1.08	0.97	0.96	0.96	0.97	0.88	0.93				0.99	1	1.08	0.89	1.06	0.88	1.06	1.08	0.98	0.98	0.91	0.9		0.6887	0.1613	0.5004	0.2414	0.8383	0.7184	0.9617
4360			pantetheine	LC/MS neg	57555	C00831	HMDB0003426	439322					1.38	1.13	0.57	0.59	0.55	0.72	0.63	1.13	1.34	1.25	1.2	1.29	0.82	1.61				1.38	1.13	0.56	0.59	0.57	0.72	0.69	1.13	1.41	1.38	1.16	1.19		9.8608e-05	4.6124e-05	0.0888	0.0968	0.0229	0.1554	0.0749
4361			phosphopantetheine	LC/MS neg	15504	C01134	HMDB0001416	987					1.33	0.92	1.34	0.78	1.11	1.13	1.56	1.28	1.1	1.08	0.9	0.92	1.04	1				1.33	0.92	1.4	0.78	1.17	1.13	1.65	1.28	1.12	1.09	0.85	0.87		2.4996e-06	1.4813e-06	0.0182	0.0336	0.123	0.3568	0.0037
4362			3'-dephosphocoenzyme A	LC/MS neg	18289	C00882	HMDB0001373	444485					0.92	2.23	0.5	1.57	0.87	0.65	0.46	0.52	1.61	2.04	0.93	0.73	1.44	1.49				0.92	2.23	0.52	1.57	0.97	0.65	0.48	0.52	1.72	2.08	0.83	0.69		3.5494e-07	2.4438e-07	4.32e-06	4.1688e-05	0.1522	0.3885	0.9117
4363			3'-dephospho-acetyl-CoA	LC/MS neg	54675			193680					0.49	1.18	0.34	1.06	0.78	0.44	0.28	0.65	1.14	1	0.88	1	0.52	1				0.49	1.18	0.34	1.06	0.8	0.44	0.28	0.65	1.17	1	0.85	1		0.0003	0.0001	0.2964	0.1823	0.1644	0.4026	0.0892
4364			coenzyme A	LC/MS neg	46322	C00010	HMDB0001423	87642					0.88	0.87	0.29	1.02	0.29	1.03	0.31	0.28	0.86	0.92	1.01	0.94	0.9	0.87				0.88	0.87	0.31	1.02	0.31	1.03	0.32	0.28	0.88	0.93	0.94	0.89		0	0	0.3543	0.202	0.9674	0.7445	0.2301
4374		Ascorbate and Aldarate Metabolism	2-O-methylascorbic acid	LC/MS polar	63990		HMDB0240294	54726398					1.01	0.85	1.46	1.03	1.02	1.23	1.05	0.83	0.7	0.61	0.84	0.97	1.04	0.59				1.01	0.85	1.62	1.03	1.11	1.23	1.13	0.83	0.69	0.59	0.77	0.9		0.6961	0.1628	0.0798	0.09	0.2503	0.4905	0.9325
4375			threonate	LC/MS polar	27738	C01620	HMDB0000943 HMDB0062620	5460407;151152					0.91	0.7	1.34	0.9	1.53	1.17	1.71	1.07	1.05	0.9	0.63	0.73	0.82	0.66				0.91	0.7	1.5	0.9	1.67	1.17	1.6	1.07	1.01	0.75	0.58	0.79		0.0206	0.0066	0.5016	0.2416	0.6904	0.7123	0.3829
4382		Tocopherol Metabolism	alpha-tocopherol	LC/MS pos late	1561	C02477	HMDB0001893	86472					1.03	1.03	1.19	0.85	1.33	0.85	1.19	1.47	1.15	1.02	0.94	1.05	0.87	1.07				1.03	1.03	1.28	0.85	1.4	0.85	1.25	1.47	1.13	1.01	0.89	0.99		2.2425e-05	1.1553e-05	0.461	0.2323	0.4015	0.5928	0.7319
4393			alpha-CEHC sulfate	LC/MS neg	47666								1.14	0.78	3.35	1.2	1.64	1.75	2	1.07	0.56	0.47	0.78	0.93	1.37	0.44				1.14	0.78	3.77	1.2	1.79	1.75	2.15	1.07	0.54	0.45	0.71	0.87		6.6424e-05	3.2088e-05	0.1397	0.123	0.0963	0.3105	0.7296
4406		Biotin Metabolism	biotin	LC/MS pos early	568	C00120	HMDB0000030	171548					0.97	1.02	1.37	0.94	1.34	0.9	1.24	1.38	0.95	0.92	0.97	1	0.91	0.92				0.97	1.02	1.47	0.94	1.43	0.9	1.33	1.38	0.94	0.92	0.91	0.93		1.0716e-06	6.7476e-07	0.6863	0.2953	0.837	0.7184	0.8119
4411		Folate Metabolism	5-methyltetrahydrofolate (5MeTHF)	LC/MS neg	18330	C00440	HMDB0001396	3729					1.13	0.87	0.47	0.81	0.39	1.05	0.28	0.31	0.94	0.53	0.66	1.17	0.92	0.62				1.13	0.87	0.5	0.81	0.42	1.05	0.3	0.31	0.96	0.53	0.61	1.1		1e-15	2e-15	0.0008	0.0029	0.1642	0.4026	0.4197
4430		Hemoglobin and Porphyrin Metabolism	bilirubin (Z,Z)	LC/MS pos late	43807	C00486	HMDB0000054	5280352					0.92	0.82	0.84	0.77	0.78	0.86	1.08	1	0.85	1.05	0.98	0.8	0.71	0.83				0.92	0.82	0.9	0.77	0.82	0.86	1.17	1	0.84	1.07	0.94	0.73		0.1585	0.0429	0.0289	0.0468	0.2699	0.5038	0.5973
4442		Thiamine Metabolism	thiamin (vitamin B1)	LC/MS pos early	5341	DG00125 C00378 D08580	HMDB0000235	1130					1.29	1.11	0.88	0.88	0.74	1.02	0.75	0.82	1.08	0.94	0.97	1.11	1.13	1.04				1.29	1.11	0.93	0.88	0.77	1.02	0.81	0.82	1.06	0.97	0.93	1.02		0.0003	0.0001	0.1649	0.1315	0.6321	0.6922	0.0325
4443			thiamin monophosphate	LC/MS pos early	15798	C01081	HMDB0002666	1131;3382778					1.95	0.58	1.25	0.61	0.78	2.05	2.14	1.08	1.21	0.99	0.85	1.03	1.19	1.03				1.95	0.58	1.33	0.61	0.83	2.05	2.29	1.08	1.22	1	0.79	0.96		0.0014	0.0005	3.5622e-09	8.9377e-08	5.3018e-06	0.0003	9.227e-07
4444			thiamin diphosphate	LC/MS neg	35670	C00068	HMDB0001372	1132					0.93	1.1	0.63	1.02	0.63	0.86	0.58	0.67	0.93	1.02	1.08	0.98	0.94	1.01				0.93	1.1	0.66	1.02	0.66	0.86	0.62	0.67	0.92	1.04	1.03	0.92		6.3721e-11	8.0937e-11	0.3625	0.206	0.7723	0.718	0.4049
4445			5-(2-hydroxyethyl)-4-methylthiazole	LC/MS pos early	27673	C04294	HMDB0032985	1136					1.21	0.93	0.63	0.9	0.72	1.18	1.07	0.57	1.38	1.56	0.72	0.64	1.1	0.99				1.21	0.93	0.61	0.9	0.75	1.18	1.16	0.57	1.51	1.77	0.69	0.59		0.0122	0.004	0.1336	0.1203	0.2958	0.5261	0.1054
4451		Vitamin A Metabolism	retinol (vitamin A)	LC/MS pos late	1806	C00473	HMDB0000305	445354					1.1	0.94	1.09	0.82	1.03	0.95	1.11	1.2	1.04	0.96	0.95	1.03	0.89	0.99				1.1	0.94	1.16	0.82	1.08	0.95	1.19	1.2	1.02	0.96	0.91	0.97		0.0703	0.0204	0.319	0.1902	0.7782	0.718	0.3341
4453			carotene diol (1)	LC/MS pos late	57635								1	1	1.62	1	2.09	1	2.33	1.71	1.28	1.43	0.82	0.74	1	1.05				1	1	1.75	1	2.27	1	2.47	1.71	1.3	1.41	0.75	0.69		1.7192e-10	2.0265e-10	0.1451	0.1247	0.1451	0.3844	1
4467		Vitamin B6 Metabolism	pyridoxine (vitamin B6)	LC/MS neg	608	D08454	HMDB0000239	1054					0.82	0.99	1.21	1.01	1.09	0.84	1.03	1.09	0.74	0.84	1.01	0.89	0.83	0.75				0.82	0.99	1.3	1.01	1.17	0.84	1.1	1.09	0.74	0.83	0.94	0.83		0.1215	0.0341	0.0101	0.0223	0.8248	0.7184	0.0987
4469			pyridoxamine	LC/MS pos early	2150	C00534	HMDB0001431	1052					1.23	1.21	1.21	0.96	1.05	0.98	0.99	1.17	1.07	0.99	1.07	1.15	1.18	1.14				1.23	1.21	1.26	0.96	1.11	0.98	1.06	1.17	1.08	1.02	1.01	1.07		0.0931	0.0266	0.1863	0.1402	0.5067	0.6551	0.0435
4470			pyridoxamine phosphate	LC/MS pos early	3138	C00647	HMDB0001555	1053					1.24	1.24	0.78	0.78	0.67	0.78	0.77	0.89	1.06	1.22	1.03	0.89	0.96	1.09				1.24	1.24	0.82	0.78	0.66	0.78	0.82	0.89	1	1.24	1.04	0.84		0.0011	0.0004	0.1364	0.1214	0.5376	0.6622	0.1069
4471			pyridoxal phosphate	LC/MS neg	5331	C00018	HMDB0001491	1051					0.79	0.22	0.7	0.4	0.72	1.41	3.7	1.86	0.82	1.19	1.03	0.71	0.32	0.84				0.79	0.22	0.79	0.4	0.72	1.41	3.93	1.86	0.73	1.12	1.03	0.67		0.0132	0.0043	0.0002	0.0009	1.1073e-06	9.4022e-05	0.3524
4472			pyridoxal	LC/MS pos early	1651	C00250	HMDB0001545	1050					1.13	1.18	1.51	0.94	1.3	0.9	1.31	1.35	0.98	1.02	0.97	0.92	1.06	0.95				1.13	1.18	1.61	0.94	1.38	0.9	1.41	1.35	0.97	1.03	0.91	0.86		1.7563e-06	1.0737e-06	0.5188	0.247	0.8033	0.7184	0.2306
4473			pyridoxate	LC/MS polar	31555	C00847	HMDB0000017	6723					0.93	0.88	1.77	1.17	1.33	1.23	1.26	1	0.7	0.63	0.88	0.98	1.08	0.61				0.93	0.88	1.94	1.17	1.45	1.23	1.35	1	0.69	0.61	0.81	0.91		0.0025	0.0009	0.0768	0.0879	0.161	0.4001	0.6331
4484	Xenobiotics	Benzoate Metabolism	hippurate	LC/MS neg	15753	C01586	HMDB0000714	464					1	0.89	1.89	1.04	1.36	1.18	1.38	1.09	0.72	0.65	0.84	0.93	1.04	0.6				1	0.89	2.09	1.04	1.47	1.18	1.48	1.09	0.71	0.63	0.77	0.87		0.0002	9.0966e-05	0.1106	0.1084	0.1986	0.4516	0.9954
4488			2-hydroxyhippurate (salicylurate)	LC/MS neg	18281	C07588	HMDB0000840	10253					0.98	0.83	2.05	1.18	1.42	1.39	1.44	0.95	0.68	0.59	0.79	0.92	1.16	0.54				0.98	0.83	2.29	1.18	1.58	1.39	1.54	0.95	0.68	0.56	0.71	0.86		0.0024	0.0009	0.1234	0.1154	0.1467	0.3844	0.8576
4490			3-hydroxyhippurate	LC/MS neg	39600		HMDB0006116	450268					0.97	0.75	3.02	1.23	1.83	1.6	1.95	1.15	0.59	0.48	0.78	0.94	1.19	0.46				0.97	0.75	3.38	1.23	2.03	1.6	2.07	1.15	0.58	0.46	0.7	0.89		6.9228e-06	3.8203e-06	0.0556	0.0729	0.154	0.3903	0.7486
4499			benzoate	LC/MS neg	15778	C00180	HMDB0001870	243					1.18	0.87	1.19	0.9	0.76	1.22	1.16	0.94	0.75	0.85	1.11	0.99	1.06	0.84				1.18	0.87	1.29	0.9	0.82	1.22	1.27	0.94	0.75	0.86	1.03	0.9		0.9039	0.2018	0.3927	0.2134	0.0887	0.3011	0.2452
4521			catechol sulfate	LC/MS neg	35320		HMDB0059724	3083879					0.94	0.88	1.76	1.13	1.26	1.21	1.23	0.9	0.67	0.61	0.8	0.88	1.06	0.54				0.94	0.88	1.96	1.13	1.36	1.21	1.32	0.9	0.66	0.59	0.74	0.82		0.0219	0.0069	0.0821	0.0915	0.1525	0.3885	0.7017
4524			guaiacol sulfate	LC/MS neg	46111		HMDB0060013	22473					0.91	1	1.28	1.05	1.25	0.95	1.12	1.14	0.88	0.88	0.96	0.96	0.95	0.85				0.91	1	1.38	1.05	1.34	0.95	1.2	1.14	0.88	0.87	0.89	0.9		0.0067	0.0023	0.5981	0.268	0.8962	0.7269	0.4382
4528			4-methylcatechol sulfate	LC/MS neg	46146		HMDB0240459	54104170					0.98	0.92	1.74	1.07	1.27	1.14	1.29	0.98	0.71	0.68	0.83	0.87	1.05	0.59				0.98	0.92	1.93	1.07	1.38	1.14	1.39	0.98	0.7	0.66	0.76	0.81		0.0061	0.0021	0.2354	0.1599	0.2196	0.4655	0.891
4546			4-ethylphenylsulfate	LC/MS neg	36099	C13637	HMDB0062551	20822574					0.97	0.73	2.77	1.09	1.64	1.45	1.87	1.11	0.58	0.5	0.74	0.86	1.06	0.43				0.97	0.73	3.1	1.09	1.82	1.45	2.02	1.11	0.57	0.48	0.67	0.8		4.4998e-05	2.21e-05	0.0402	0.0593	0.1724	0.4085	0.8348
4575			p-cresol sulfate	LC/MS neg	36103		HMDB0011635	4615423					0.98	0.85	2.05	1.04	1.42	1.2	1.5	1.09	0.68	0.62	0.8	0.87	1.02	0.54				0.98	0.85	2.27	1.04	1.54	1.2	1.6	1.09	0.67	0.6	0.74	0.82		0.0002	7.8464e-05	0.1024	0.1049	0.252	0.4919	0.8647
4652		Food Component/Plant	maltol sulfate	LC/MS neg	48696								1.39	0.86	0.59	0.79	0.45	1.28	0.74	0.64	1.06	1.07	1.11	1.1	1.09	1.18				1.39	0.86	0.61	0.79	0.47	1.28	0.8	0.64	1.07	1.12	1.06	1.01		1.34e-13	2.6e-13	0.0024	0.0071	0.0072	0.0617	0.0011
4808			3-formylindole	LC/MS pos early	62863	C08493	HMDB29737	10256					1.19	1.64	1.7	1.14	1.52	0.83	1.16	1.33	1.06	1.13	1	0.94	1.36	1.06				1.19	1.64	1.78	1.14	1.59	0.83	1.28	1.33	1.07	1.18	0.95	0.86		1.8551e-05	9.7618e-06	0.0383	0.0569	0.2297	0.4682	0.1845
4851			beta-guanidinopropanoate	LC/MS pos early	35101	C03065	HMDB0013222	67701					1.18	1.04	0.64	0.95	0.62	1.07	0.7	0.68	1.14	1.14	1.05	1.05	1.11	1.2				1.18	1.04	0.68	0.95	0.65	1.07	0.74	0.68	1.13	1.13	0.99	0.99		1.7818e-11	2.4767e-11	0.0801	0.09	0.7401	0.716	0.0756
4918			erythritol	LC/MS polar	20699	C00503	HMDB0002994	222285					0.89	0.97	1.1	1.13	1.08	1.03	1	0.93	0.87	0.88	0.97	0.96	1	0.84				0.89	0.97	1.2	1.13	1.18	1.03	1.06	0.93	0.87	0.86	0.89	0.9		0.7845	0.1792	0.4971	0.2408	0.8417	0.7184	0.3091
4928			quinate	LC/MS polar	18335	C00296	HMDB0003072	6508					1.58	4.13	1.94	0.71	0.63	0.27	0.24	1.06	0.52	0.52	1.19	1.19	1.13	0.62				1.58	4.13	2.13	0.71	0.63	0.27	0.24	1.06	0.47	0.47	1.19	1.19		0.5402	0.1292	0.9527	0.3578	0.2249	0.4682	0.3125
4982			mannonate*	LC/MS polar	62864			3246006					1.06	1.01	1.05	0.93	1.07	0.97	1.02	1.1	1.09	0.99	0.95	1.05	0.99	1.04				1.06	1.01	1.12	0.93	1.15	0.97	1.1	1.1	1.1	0.99	0.89	0.98		0.329	0.083	0.6938	0.297	0.9361	0.7383	0.5543
5087			stachydrine	LC/MS pos early	34384	C10172	HMDB0004827	115244					1.06	0.96	1.25	1.15	1.09	1.26	1.16	0.88	0.92	0.9	0.93	0.96	1.21	0.86				1.06	0.96	1.35	1.15	1.17	1.26	1.25	0.88	0.92	0.89	0.86	0.89		0.1673	0.0451	0.7763	0.3193	0.3916	0.59	0.6545
5499		Drug - Antibiotic	penicillin G	LC/MS neg	37468	C05551	HMDB0015186	5904					1.01	0.88	1.33	1.03	1.01	1.19	0.98	0.83	0.77	0.64	0.84	1	1.04	0.65				1.01	0.88	1.46	1.03	1.1	1.19	1.05	0.83	0.77	0.63	0.77	0.94		0.9811	0.2145	0.0645	0.0797	0.2389	0.4753	0.9282
5990		Drug - Topical Agents	salicylate	LC/MS polar	1515	C00805	HMDB0001895	338					1.02	0.91	1.4	0.98	1.13	1.09	1.05	1.1	0.83	0.69	0.95	1.14	1	0.79				1.02	0.91	1.45	0.98	1.22	1.09	1.1	1.1	0.85	0.69	0.88	1.09		0.0373	0.0112	0.1723	0.1353	0.5409	0.6622	0.7482
6118		Chemical	sulfate*	LC/MS neg	46960	C00059	HMDB01448	5152822					0.84	0.84	1.03	0.97	0.91	0.97	0.8	0.82	0.74	0.65	0.88	1	0.82	0.65				0.84	0.84	1.12	0.97	0.98	0.97	0.86	0.82	0.74	0.65	0.82	0.93		0.0554	0.0163	0.0093	0.0215	0.657	0.7022	0.2154
6121			O-sulfo-tyrosine	LC/MS neg	45413		HMDB0155722	514186					1.94	1.47	2.53	0.8	0.81	1.05	1.15	1.27	0.62	0.67	1.24	1.16	1.55	0.77				1.94	1.47	2.86	0.8	0.81	1.05	1.18	1.27	0.55	0.61	1.24	1.13		0.0152	0.0049	0.7453	0.3111	0.0205	0.1433	0.0074
6184			dimethyl sulfone	LC/MS pos early	43424	C11142	HMDB0004983	6213					0.9	0.59	0.39	0.38	0.29	0.58	0.44	0.65	0.67	0.68	0.86	0.85	0.34	0.58				0.9	0.59	0.41	0.38	0.29	0.58	0.46	0.65	0.65	0.66	0.84	0.82		1.8e-13	3.4e-13	5.9322e-08	9.3024e-07	0.0042	0.0409	0.5092
6195			HEPES	LC/MS neg	21248			23831					1.03	0.89	1.4	0.97	1.11	1.13	1.15	1.04	0.82	0.73	0.92	1.02	1	0.75				1.03	0.89	1.51	0.97	1.2	1.13	1.23	1.04	0.81	0.72	0.85	0.96		0.025	0.0078	0.103	0.1051	0.4759	0.6428	0.7968
6209			2,4-di-tert-butylphenol	LC/MS neg	64328								1.04	0.97	0.99	1.23	1.41	1.32	1.38	0.87	1.47	1.35	0.76	0.83	1.28	1.12				1.04	0.97	1.07	1.23	1.56	1.32	1.42	0.87	1.51	1.28	0.69	0.81		0.1217	0.0341	0.2641	0.169	0.1031	0.3304	0.8399
6220			phenol red	LC/MS neg	36817	C12600		4766					1.07	0.82	2.48	1.07	1.55	1.4	1.83	1.18	0.67	0.61	0.81	0.9	1.15	0.55				1.07	0.82	2.76	1.07	1.7	1.4	1.96	1.18	0.66	0.58	0.74	0.84		6.3824e-06	3.5621e-06	0.152	0.128	0.1463	0.3844	0.7501
6237			trizma acetate	LC/MS pos early	20710	C07182		16218782					1.03	0.93	1.53	1.04	1.14	1.15	1.21	1.08	0.77	0.74	0.99	1.03	1.07	0.76				1.03	0.93	1.69	1.04	1.22	1.15	1.3	1.08	0.74	0.72	0.92	0.96		0.0139	0.0045	0.4655	0.2331	0.5713	0.6703	0.8219
6270			4-acetamidobenzoate	LC/MS neg	57585	D03836		6918889					0.85	0.89	1.31	0.9	1.15	0.86	1.09	1.22	0.75	0.74	0.95	0.95	0.76	0.71				0.85	0.89	1.42	0.9	1.23	0.86	1.16	1.22	0.73	0.73	0.89	0.9		0.0089	0.003	0.0077	0.0183	0.7592	0.7176	0.2012
6271			thioproline	LC/MS pos early	53231		HMDB0062164	93176					0.95	0.96	1.54	0.88	1.59	0.87	1.74	1.77	0.98	1.08	0.98	0.89	0.84	0.96				0.95	0.96	1.64	0.88	1.67	0.87	1.87	1.77	0.97	1.1	0.94	0.83		1.226e-12	1.986e-12	0.3481	0.1994	0.6988	0.7131	0.7034
6484	Partially Characterized Molecules	Partially Characterized Molecules	glutamine_degradant*	LC/MS pos early	46225								1.02	1	0.82	0.89	0.71	0.91	0.72	0.73	0.89	0.88	0.91	0.92	0.91	0.81				1.02	1	0.87	0.89	0.75	0.91	0.77	0.73	0.89	0.89	0.86	0.86		9.5298e-08	7.3132e-08	0.165	0.1315	0.7261	0.7142	0.7952
	N/A	N/A	X-10445	LC/MS neg	25638								1.09	0.65	0.34	0.65	0.33	1.09	0.45	0.47	1.07	0.87	0.92	1.14	0.71	0.99				1.09	0.65	0.37	0.65	0.35	1.09	0.48	0.47	1.05	0.85	0.87	1.07		0	0	8.9855e-05	0.0005	0.0466	0.2285	0.3266
			X-11381	LC/MS pos early	32698								1.02	1.05	0.88	0.96	0.92	0.94	0.93	1.04	1.06	1.1	1.09	1.05	0.98	1.16				1.02	1.05	0.94	0.96	0.98	0.94	1	1.04	1.07	1.11	1.02	0.98		0.1493	0.0407	0.6491	0.2832	0.5401	0.6622	0.7241
			X-11580	LC/MS neg	47479								1.94	1.22	5.59	0.64	2.9	1.03	3.84	4.24	1.01	0.84	0.94	1.13	1.25	0.95				1.94	1.22	5.96	0.64	3.06	1.03	4.1	4.24	0.99	0.84	0.89	1.06		0	0	0.1277	0.1174	0.1711	0.4085	0.003
			X-11677	LC/MS pos early	47607								1.02	1.19	0.76	0.89	0.94	0.77	0.76	1.01	1.26	1.2	0.96	1.01	0.91	1.21				1.02	1.19	0.77	0.89	1	0.77	0.85	1.01	1.32	1.31	0.9	0.91		0.137	0.0379	0.5769	0.2622	0.5063	0.6551	0.9549
			X-11787	LC/MS pos early	33132								0.98	1.15	1	1	0.99	0.85	0.93	0.9	0.96	1.07	0.91	0.82	0.98	0.87				0.98	1.15	1.08	1	1.05	0.85	1	0.9	0.95	1.06	0.86	0.76		0.2792	0.0715	0.0883	0.0967	0.9051	0.7284	0.847
			X-11979	LC/MS neg	47508								1.16	0.83	1.38	0.83	1.05	1.17	1.64	1.25	0.89	0.99	0.99	0.89	0.97	0.88				1.16	0.83	1.48	0.83	1.1	1.17	1.75	1.25	0.87	0.98	0.94	0.83		3.7074e-05	1.8517e-05	0.4136	0.2212	0.0523	0.2424	0.1692
			X-12013	LC/MS neg	46611								0.94	0.97	1.7	1.02	1.22	1	1.24	1.03	0.68	0.7	0.86	0.83	0.96	0.58				0.94	0.97	1.88	1.02	1.31	1	1.32	1.03	0.66	0.68	0.8	0.78		0.005	0.0018	0.0918	0.0968	0.28	0.5112	0.7063
			X-12015	LC/MS neg	47390								0.85	1.09	1.38	1.03	1.42	0.8	1.21	1.35	0.88	0.96	0.97	0.89	0.87	0.85				0.85	1.09	1.48	1.03	1.52	0.8	1.29	1.35	0.87	0.95	0.91	0.83		1.4738e-06	9.1624e-07	0.0363	0.0542	0.7243	0.7142	0.1184
			X-12026	LC/MS neg	47905								0.75	1.15	1.47	1.19	1.47	0.78	1.35	1.17	0.75	1.05	0.94	0.67	0.9	0.71				0.75	1.15	1.6	1.19	1.58	0.78	1.42	1.17	0.74	1.03	0.88	0.64		1.5786e-05	8.489e-06	0.0001	0.0006	0.5899	0.6736	0.0207
			X-12100	LC/MS pos early	47687								1.26	1.36	1.36	0.97	1.3	0.9	1.44	1.58	1.2	1.44	1.18	0.98	1.22	1.42				1.26	1.36	1.43	0.97	1.35	0.9	1.51	1.58	1.19	1.44	1.13	0.93		4.016e-09	3.7931e-09	4.0376e-05	0.0003	0.3962	0.59	0.0133
			X-12101	LC/MS pos early	47642								0.81	0.74	1.34	0.84	1.3	0.91	1.51	1.55	0.78	0.84	1.01	0.94	0.68	0.79				0.81	0.74	1.46	0.84	1.36	0.91	1.61	1.55	0.75	0.82	0.96	0.88		1.6799e-05	8.9359e-06	0.0685	0.0826	0.7701	0.718	0.2544
			X-12117	LC/MS pos early	47695								0.97	0.84	2.22	1.23	1.53	1.41	1.36	0.95	0.67	0.51	0.76	0.98	1.19	0.5				0.97	0.84	2.48	1.23	1.68	1.41	1.44	0.95	0.65	0.49	0.69	0.93		0.0032	0.0012	0.1462	0.1252	0.1091	0.3348	0.7813
			X-12127	LC/MS pos early	47702								1.01	2.07	0.97	1.35	0.87	0.66	1.1	0.91	0.9	2.34	1.42	0.55	1.36	1.28				1.01	2.07	1.03	1.35	0.9	0.66	1.2	0.91	0.87	2.4	1.37	0.5		0.5146	0.1241	1.8956e-09	5.2846e-08	0.7411	0.716	0.7957
			X-12216	LC/MS neg	46613								0.83	0.96	2.08	1.09	1.6	0.94	1.47	1.33	0.64	0.68	0.91	0.86	0.91	0.58				0.83	0.96	2.3	1.09	1.74	0.94	1.57	1.33	0.63	0.66	0.84	0.8		1.6043e-06	9.849e-07	0.0344	0.052	0.4519	0.6256	0.2314
			X-12462	LC/MS pos early	46620								0.73	1.4	1.29	1.17	2.21	0.61	1.92	2.34	1.25	2.07	1.24	0.75	0.85	1.55				0.73	1.4	1.33	1.17	2.26	0.61	2.07	2.34	1.25	2.17	1.21	0.69		4.8082e-08	3.8088e-08	0.0005	0.002	0.2725	0.5048	0.3002
			X-12729	LC/MS neg	46623								1.02	0.93	1.93	1.06	1.22	1.16	1.3	1.03	0.64	0.63	0.89	0.91	1.08	0.57				1.02	0.93	2.11	1.06	1.35	1.16	1.39	1.03	0.65	0.61	0.81	0.85		0.0048	0.0017	0.1933	0.1435	0.1945	0.4484	0.9987
			X-13507	LC/MS pos early	47439								1.04	0.98	1.02	0.93	0.84	0.99	0.86	0.83	0.86	0.83	0.92	0.95	0.97	0.79				1.04	0.98	1.11	0.93	0.91	0.99	0.93	0.83	0.85	0.83	0.85	0.88		0.0271	0.0084	0.4933	0.2394	0.7002	0.7131	0.7244
			X-13553	LC/MS neg	47959								0.98	0.85	1.91	1.03	1.27	1.18	1.48	1.14	0.65	0.66	0.93	0.91	1	0.6				0.98	0.85	2.1	1.03	1.38	1.18	1.58	1.14	0.64	0.64	0.85	0.85		0.0001	4.6998e-05	0.0803	0.09	0.2334	0.4735	0.82
			X-14056	LC/MS pos early	46632								0.51	0.3	0.96	0.61	1.45	1.02	2.63	2.35	0.77	0.83	0.98	0.91	0.31	0.76				0.51	0.3	1.04	0.61	1.54	1.02	2.88	2.35	0.76	0.84	0.93	0.83		2.2052e-06	1.3262e-06	0.0002	0.0008	0.012	0.0955	0.0038
			X-15161	LC/MS pos early	47620								0.91	2.52	1.85	1.4	2.31	0.5	1.11	2.41	1.14	1.51	1.45	1.09	1.27	1.65				0.91	2.52	1.89	1.4	2.38	0.5	1.22	2.41	1.14	1.63	1.42	0.99		3.4624e-07	2.4064e-07	0.0003	0.0012	0.0461	0.228	0.6841
			X-15220	LC/MS neg	46658								0.77	0.78	1.2	0.9	1.75	0.89	1.51	1.82	1.12	0.98	0.94	1.07	0.69	1.05				0.77	0.78	1.31	0.9	1.81	0.89	1.63	1.82	1.06	0.98	0.91	0.99		6.6039e-09	5.9331e-09	0.3275	0.1924	0.0411	0.2135	0.0351
			X-15806	LC/MS neg	47263								0.94	1.55	0.31	1.3	0.4	0.79	0.23	0.35	1.21	1.15	1.13	1.19	1.23	1.37				0.94	1.55	0.33	1.3	0.45	0.79	0.25	0.35	1.29	1.17	1.02	1.13		0	0	0.0039	0.0112	0.0509	0.2402	0.7001
			X-17010	LC/MS neg	47993								0.99	0.8	1.29	0.86	1.31	1.05	1.4	1.53	1.01	0.88	1	1.15	0.85	1.01				0.99	0.8	1.37	0.86	1.38	1.05	1.48	1.53	0.99	0.86	0.95	1.09		3.9007e-05	1.9339e-05	0.2815	0.1764	0.7254	0.7142	0.9594
			X-18345	LC/MS neg	47342								1.11	1	1.23	0.84	1.17	0.94	1.27	1.28	1.06	1.03	0.92	0.95	0.93	0.98				1.11	1	1.26	0.84	1.23	0.94	1.34	1.28	1.09	1.06	0.87	0.9		1.8377e-05	9.7051e-06	0.2359	0.1599	0.8186	0.7184	0.1759
			X-21351	LC/MS neg	46396								1.32	3.47	2.17	0.66	2.05	0.25	0.41	4.45	1.25	0.65	1.44	2.76	0.88	1.79				1.32	3.47	2.03	0.66	1.81	0.25	0.44	4.45	1.18	0.75	1.63	2.56		0.0001	5.4273e-05	0.3202	0.1904	5.5141e-06	0.0003	0.3094
			X-21740	LC/MS neg	46909								1.05	1.05	1.41	0.92	1.36	0.92	1.5	1.44	1.01	1.11	0.97	0.88	0.96	0.98				1.05	1.05	1.49	0.92	1.46	0.92	1.6	1.44	1.02	1.12	0.91	0.83		4.7357e-10	4.984e-10	0.4145	0.2212	0.8582	0.7184	0.5795
			X-22498	LC/MS neg	47762								0.82	0.73	0.59	1.15	0.71	1.29	0.63	0.63	0.99	0.77	1.02	1.31	0.94	1.01				0.82	0.73	0.61	1.15	0.8	1.29	0.69	0.63	1.08	0.83	0.91	1.19		0.0025	0.0009	0.4328	0.2244	0.9833	0.7469	0.3974
			X-22771	LC/MS neg	48076								0.93	0.93	1.14	0.88	1.3	0.88	1.47	1.43	1.06	1.2	0.97	0.86	0.82	1.03				0.93	0.93	1.21	0.88	1.37	0.88	1.57	1.43	1.06	1.21	0.92	0.81		2.5103e-07	1.7782e-07	0.2662	0.1695	0.203	0.4531	0.5286
			X-22772	LC/MS neg	48077								0.84	1.16	1.07	0.98	1.73	0.71	1.06	1.56	1.36	1.15	0.89	1.05	0.82	1.21				0.84	1.16	1.14	0.98	1.79	0.71	1.14	1.56	1.32	1.16	0.86	0.98		2.2359e-05	1.1553e-05	0.2922	0.1813	0.0058	0.0536	0.1605
			X-22776	LC/MS neg	48081								1.06	0.73	1.08	0.7	0.84	1.01	1.14	1.28	0.82	0.77	1.07	1.14	0.74	0.88				1.06	0.73	1.14	0.7	0.91	1.01	1.23	1.28	0.84	0.79	0.99	1.06		0.3758	0.0937	0.0117	0.0251	0.1512	0.3885	0.525
			X-23171	LC/MS pos early	48851								0.98	1.02	0.71	0.96	0.83	0.92	0.75	0.87	1.16	1.08	1	1.07	0.94	1.16				0.98	1.02	0.74	0.96	0.89	0.92	0.81	0.87	1.18	1.12	0.94	0.99		1.3062e-05	7.0759e-06	0.8175	0.3262	0.3864	0.59	0.8962
			X-23739	LC/MS pos early	49637								1.13	1.14	1.33	0.91	1.18	0.89	1.37	1.29	1	1.17	0.98	0.84	1.02	0.98				1.13	1.14	1.4	0.91	1.21	0.89	1.48	1.29	0.98	1.21	0.96	0.77		0.0003	0.0001	0.3181	0.1902	0.8166	0.7184	0.198
			X-23782	LC/MS pos late	49681								1.01	1.18	0.84	0.95	0.87	0.81	0.68	0.99	1.03	0.96	1.08	1.17	0.95	1.12				1.01	1.18	0.87	0.95	0.89	0.81	0.74	0.99	1.03	1	1.05	1.08		0.0024	0.0009	0.9195	0.3529	0.1193	0.353	0.9776
			X-24035	LC/MS pos late	52064								0.97	0.97	1.01	0.95	1.01	0.95	1.01	1.16	0.98	0.98	1.09	1.09	0.92	1.07				0.97	0.97	1.04	0.95	1.06	0.95	1.08	1.16	0.99	1	1.04	1.02		0.3727	0.0931	0.9762	0.3634	0.6921	0.7123	0.8422
			X-24241	LC/MS pos early	52280								1.02	1.01	0.94	0.93	1	0.94	0.95	1.07	1.08	1.02	1	1.06	0.95	1.08				1.02	1.01	0.98	0.93	1.09	0.94	1	1.07	1.13	1.03	0.92	1.01		0.874	0.1957	0.9473	0.3569	0.7974	0.7184	0.8338
			X-24425	LC/MS pos early	52655								1.77	1.48	1.18	1.18	0.64	1.4	0.49	0.42	0.96	0.61	0.78	1.22	2.08	0.75				1.77	1.48	1.26	1.18	0.69	1.4	0.54	0.42	0.97	0.63	0.72	1.1		3.9114e-05	1.9339e-05	0.0273	0.0445	0.0007	0.0118	0.0006
			X-24518	LC/MS pos early	52839								0.87	0.47	2.36	1.51	1.7	2.79	2.65	0.74	0.63	0.53	0.65	0.77	1.31	0.41				0.87	0.47	2.62	1.51	1.88	2.79	2.81	0.74	0.62	0.5	0.59	0.73		0.0027	0.001	0.0643	0.0797	0.0205	0.1433	0.6756
			X-24728	LC/MS pos early	53157								0.53	0.48	0.89	0.6	1.81	0.67	2.48	3.04	1.08	1.33	1.01	0.82	0.32	1.09				0.53	0.48	0.94	0.6	1.88	0.67	2.65	3.04	1.06	1.34	0.97	0.77		2.2523e-09	2.2124e-09	0.0143	0.0289	0.0011	0.0134	0.0154
			X-25004	LC/MS neg	61526								1.65	1.82	1.05	0.99	0.72	0.9	0.62	0.69	1.14	1.08	0.95	1	1.63	1.08				1.65	1.82	1.07	0.99	0.76	0.9	0.67	0.69	1.16	1.13	0.9	0.93		9.0308e-05	4.2511e-05	0.0015	0.0048	0.0585	0.2548	0.0005
			X-25009	LC/MS pos early	61531								1.83	2.11	3.84	1.04	1.71	0.9	1.34	1.51	0.82	0.74	0.92	1.02	1.9	0.75				1.83	2.11	4.2	1.04	1.82	0.9	1.45	1.51	0.79	0.73	0.87	0.95		9.8611e-09	8.6485e-09	0.0758	0.0879	0.0004	0.0062	0.0003
			X-25026	LC/MS pos early	61590								1.49	1.72	1.41	1.15	0.98	0.99	0.68	0.95	1.03	0.83	1.12	1.39	1.71	1.15				1.49	1.72	1.45	1.15	1.05	0.99	0.69	0.95	1.07	0.83	1.04	1.36		0.7127	0.1664	0.0717	0.0853	0.0612	0.2613	0.0227
			X-25047	LC/MS neg	61611								1.51	1.34	2.46	1.08	1.29	1.22	0.94	1.1	0.79	0.51	0.92	1.42	1.63	0.73				1.51	1.34	2.68	1.08	1.41	1.22	1.03	1.1	0.8	0.51	0.84	1.31		0.0088	0.003	0.1844	0.1402	0.0043	0.0409	0.0164
			X-25060	LC/MS pos early	61624								0.63	0.61	0.86	1.44	1.24	1.49	0.82	0.84	0.91	0.59	0.98	1.52	0.91	0.89				0.63	0.61	0.89	1.44	1.42	1.49	0.92	0.84	1	0.63	0.86	1.36		0.7246	0.1677	0.1815	0.1396	0.8749	0.7194	0.2134
			X-25102	LC/MS neg	61675								1.6	1.92	0.89	0.97	0.64	0.81	0.53	0.64	1.15	1.14	0.97	0.98	1.56	1.12				1.6	1.92	0.9	0.97	0.66	0.81	0.57	0.64	1.18	1.22	0.95	0.91		1.5962e-07	1.1759e-07	0.0007	0.0024	0.0959	0.3105	0.0011
			X-25105	LC/MS neg	61678								1.64	1.78	1.95	1.16	1.25	1.07	0.88	0.98	1.06	0.8	0.9	1.19	1.89	0.96				1.64	1.78	2.01	1.16	1.32	1.07	0.96	0.98	1.08	0.85	0.86	1.09		0.0103	0.0035	0.0107	0.0233	0.0009	0.0123	0.0004
			X-25109	LC/MS pos early	61682								1.29	1.97	5.26	1.16	3.86	0.76	3.45	3.27	0.94	1.29	0.98	0.72	1.49	0.93				1.29	1.97	5.54	1.16	3.95	0.76	3.73	3.27	0.92	1.33	0.96	0.66		0	0	0.0007	0.0026	0.1699	0.4085	0.0987
			X-25111	LC/MS pos early	61684								1.73	1.6	1.67	0.92	1.15	0.99	1.35	1.18	1.19	1.3	0.95	0.87	1.59	1.13				1.73	1.6	1.8	0.92	1.2	0.99	1.47	1.18	1.15	1.31	0.91	0.8		0.0001	6.5923e-05	0.0003	0.0014	0.1575	0.3952	6.8599e-05
			X-25180	LC/MS pos early	62247								1.74	1.87	1.59	0.98	0.96	0.91	0.85	0.9	1.05	1	0.92	0.96	1.7	0.96				1.74	1.87	1.65	0.98	1.02	0.91	0.91	0.9	1.07	1.03	0.87	0.9		0.4923	0.1203	0.001	0.0035	0.0008	0.0123	1.3283e-05
			X-25794	LC/MS pos early	63564								0.95	0.97	0.83	0.92	0.81	0.9	0.77	0.89	0.94	0.91	1.01	1.04	0.87	0.94				0.95	0.97	0.87	0.92	0.87	0.9	0.82	0.89	0.96	0.92	0.94	0.97		0.0008	0.0003	0.6003	0.268	0.7508	0.716	0.6826
			X-25855	LC/MS pos early	63721								1.04	0.98	0.79	0.85	0.76	0.9	0.76	0.86	1	0.95	0.97	1.02	0.89	0.97				1.04	0.98	0.84	0.85	0.8	0.9	0.81	0.86	0.98	0.94	0.93	0.96		4.6546e-05	2.2784e-05	0.5081	0.2433	0.7385	0.716	0.6258
			X-25936	LC/MS pos early	63840								0.98	1.1	0.78	0.83	0.7	0.74	0.66	0.79	0.88	0.92	0.93	0.89	0.82	0.82				0.98	1.1	0.84	0.83	0.74	0.74	0.7	0.79	0.86	0.92	0.89	0.83		2.9765e-05	1.5019e-05	0.0893	0.0968	0.6592	0.7026	0.9523
			X-25940	LC/MS neg	63891								1.66	1.38	1.02	0.88	0.95	1.05	1.19	1.15	1.53	1.61	1.07	1.02	1.46	1.64				1.66	1.38	1.02	0.88	0.96	1.05	1.31	1.15	1.57	1.79	1.05	0.92		0.324	0.0822	0.0013	0.0043	0.8208	0.7184	0.0072
			X-25948	LC/MS pos early	63899								0.8	0.77	1.24	0.8	1.76	0.83	1.7	2.07	1.13	1.06	0.94	1.01	0.64	1.07				0.8	0.77	1.29	0.8	1.86	0.83	1.81	2.07	1.15	1.09	0.89	0.95		1.66e-12	2.574e-12	0.0583	0.0753	0.0054	0.0508	0.0369
			X-25984	LC/MS neg	63974								1.53	0.68	2.67	0.72	1.86	1.62	3.58	2.57	1.07	0.91	1	1.17	1.1	1.06				1.53	0.68	2.94	0.72	2.02	1.62	3.82	2.57	1.05	0.89	0.92	1.09		9e-15	2.1e-14	0.001	0.0034	0.0333	0.2066	0.0097
[truncated: 117 more columns]

## Sheet: Biochemicals Excluded from IPA
Biochemical Name
dodecadienoate (12:2)*
histidine methyl ester
(3'-5')-uridylyladenosine
3-(3-amino-3-carboxypropyl)uridine*		Biochemicals on this list did not have a PubChem, KEGG, HMDB, RefSeq, or other identifier that could be recognized by the IPA program, and were thus excluded from pathway and upstream regulator analysis; the majority are xenobiotics or unknown compounds
3'-dephospho-acetyl-CoA
glycerophosphoserine*
sphingadienine
4-acetamidobenzoate
2-hydroxyoleate
S-(1,2-dicarboxyethyl)glutathione
1,2-distearoyl-GPG (18:0/18:0)
heneicosapentaenoate (21:5n3)
N,N,N-trimethyl-5-aminovalerate
N-palmitoyltaurine
trizma acetate
oxindolylalanine
N-arachidonoyltaurine
N-oleoylserine
N-linoleoyltaurine*
1-palmitoyl-2-oleoyl-GPG (16:0/18:1)
N-(2-hydroxypalmitoyl)-sphingosine (d18:1/16:0(2OH))
docosatrienoate (22:3n6)*
guanosine 3'-monophosphate (3'-GMP)
(3'-5')-adenylyluridine
(3'-5')-cytidylyluridine*
(3'-5')-uridylylcytidine*
(3'-5')-uridylyluridine
1-methyl-5-imidazolelactate
hydroxy-N6,N6,N6-trimethyllysine*
beta-hydroxyisovaleroylcarnitine
3'-dephospho-CoA-glutathione*
N,N-dimethyl-pro-pro
guanosine 5'-diphospho-fucose
3-hydroxybutyroylglycine**
erucoylcarnitine (C22:1)*
nervonoylcarnitine (C24:1)*
3-hydroxyoleate*
1-oleoyl-2-arachidonoyl-GPI (18:1/20:4)*
1-stearoyl-GPG (18:0)
1-(1-enyl-oleoyl)-GPE (P-18:1)*
diacylglycerol (16:1/18:2 [2], 16:0/18:3 [1])*
N-behenoyl-sphingadienine (d18:2/22:0)*
N-nervonoyl-sphingadiene (d18:2/24:1)*
ceramide (d16:1/24:1, d18:1/22:1)*
glycosyl-N-palmitoyl-sphingosine (d18:1/16:0)
glycosyl ceramide (d18:1/23:1, d17:1/24:1)*
glycosyl ceramide (d18:2/24:1, d18:1/24:2)*
sphingomyelin (d17:1/14:0, d16:1/15:0)*
sphingomyelin (d18:1/19:0, d19:1/18:0)*
sphingomyelin (d18:1/21:0, d17:1/22:0, d16:1/23:0)*
palmitoyl-sphingosine-phosphoethanolamine (d18:1/16:0)
alpha-CEHC sulfate
carotene diol (1)
maltol sulfate
X-10445
X-11381
X-11580
X-11677
X-11787
X-11979
X-12013
X-12015
X-12026
X-12100
X-12101
X-12117
X-12127
X-12216
X-12462
X-12729
X-13507
X-13553
X-14056
X-15161
X-15220
X-15806
X-17010
X-18345
X-21351
X-21740
X-22498
X-22771
X-22772
X-22776
X-23171
X-23739
X-23782
X-24035
X-24241
X-24425
X-24518
X-24728
X-25004
X-25009
X-25026
X-25047
X-25060
X-25102
X-25105
X-25109
X-25111
X-25180
X-25794
X-25855
X-25936
X-25940
X-25948
X-25984
