# Supplementary material for: Mediator kinase inhibition suppresses hyperactive interferon signaling in Down syndrome
Source: bioRxiv preprint, doi:10.1101/2023.07.05.547813, version 4 (2024-11-20)
Supplement: Fig1_sourceData4 [file 547813_file05.xlsx]

## Sheet: Data key
Tab Name	Corresponding Figure	Description
Sibling T21 vs D21	Figure 1_S1E	GSEA Hallmarks analysis of differential gene expression in Sibling T21 lymphoblastoid cells compared to D21
Cohort GSEA	Figure 1_S2C	GSEA Hallmarks analysis of RNAseq data from whole blood transcriptome analysis of patients with and without Trisomy 21
D21 CAvsCtrl	Figure 3_S1C	GSEA Hallmarks analysis of differential gene expression in D21 cells treated with CA compared to control
Sibling T21 CAvsCtrl	Figure 3_S1D	GSEA Hallmarks analysis of differential gene expression in Sibling T21 cells treated with CA compared to control
D21 CAIFNvsIFN	Figure 3C	GSEA Hallmarks analysis of differential gene expression in D21 cells treated with CA + IFN compared to IFN alone
Sibling T21 CAIFNvsIFN	Figure 3D	GSEA Hallmarks analysis of differential gene expression in Sibling T21 cells treated with CA + IFN compared to IFN alone
D21 IFNvsCtrl	Not discussed	GSEA Hallmarks analysis of differential gene expression in D21 cells treated with IFN compared to control
Sibling T21 IFNvsCtrl	Not discussed	GSEA Hallmarks analysis of differential gene expression in Sibling T21 cells treated with IFN compared to control
Non-Sibling T21 CAvsCtrl	Figure 2_S2B	GSEA Hallmarks analysis of differential gene expression in Non-Sibling T21 cells treated for 4.5 hours with CA compared to control
C5all_NonSibT21 CAvsCtrl	Figure 2_S2C	GSEA C5.all analysis of differential gene expression in Non-Sibling T21 cells treated for 4.5 hours with CA compared to control
SiblingT21 CAvsCtrl 24hrs	Figure 2_S3B	GSEA Hallmarks analysis of differential gene expression in Sibling T21 cells treated for 24 hours with CA compared to control
GOBP D21 CAvsCtrl	Figure 2_S2H	GSEA GOBP analysis of differential gene expression in D21 cells treated with CA compared to control
GOBP D21 CAIFNvsIFN		GSEA GOBP analysis of differential gene expression in D21 cells treated with CAIFN compared to IFN alone
GOBP SibT21 CAvsCtrl 4hr	Figure 2_S2H	GSEA GOBP analysis of differential gene expression in Sibling T21 cells treated with CA for 4.5hrs compared to control
GOBP SibT21 CAIFNvsIFN		GSEA GOBP analysis of differential gene expression in SibT21 cells treated with CAIFN compared to IFN alone
GOBP NonSibT21 CAvsCtrl	Figure 2_S2H	GSEA GOBP analysis of differential gene expression in NonSibT21 cells treated with CA compared to control
DotPlot Pathways	Figure 2_S2C, Figure 2_S4D, Figure 3_S2E	Selected immune and lipid related pathways used to calculate average NES for +/- CA comparisons under basal or control conditions in all cell lines. Color of pathway names denotes grouping of pathways, containing one of the following terms: "lipid," "sterol," "fatty acid," "inflamm*," "immun*," "interferon," or "cytokine." Pathways with "negative regulation of" designation have been filtered out …

## Sheet: SiblingT21vsD21
NAME	SIZE	ES	NES	NOM p-val	FDR q-val	FWER p-val	RANK AT MAX	LEADING EDGE	Leading edge genes
HALLMARK_INTERFERON_ALPHA_RESPONSE	96	0.807028	1.72858	0	0	0	1966	tags=47%, list=10%, signal=52%	CASP1,GBP2,TENT5A,TRAFD1,TMEM140,IFI44,STAT2,CSF1,IFI44L,GBP4,USP18,LAMP3,PLSCR1,EPSTI1,TAP1,IFITM1,IFIT2,OAS1,IRF1,PARP9,MX1,HLA-C,OASL,CMTR1,UBE2L6,GMPR,TRIM5,LAP3,B2M,NUB1,ISG20,IFI35,LPAR6,IFIH1,RTP4,IRF9,DDX60,RNF31,IFI27,RSAD2,IFIT3,SAMD9L,BST2,ISG15,IRF7,
HALLMARK_MYC_TARGETS_V1	195	-0.707909	-1.86779	0	0	0	4376	tags=57%, list=22%, signal=73%	UBE2L3,APEX1,EIF4H,ERH,SYNCRIP,EIF2S2,DEK,ODC1,SNRPD2,PPM1G,YWHAQ,GNL3,EXOSC7,HNRNPD,PRPS2,KPNB1,TARDBP,PHB2,PRDX3,HDDC2,SF3B3,GOT2,SNRPA,SRSF3,SSBP1,CCT3,TXNL4A,CBX3,USP1,NME1,HNRNPU,DDX21,SERBP1,VDAC3,NHP2,FBL,SSB,SRPK1,HNRNPC,G3BP1,SNRPB2,ORC2,SMARCC1,SET,MCM4,KPNA2,CDC45,HSP90AB1,CTPS1,RUVBL2,RANBP1,NCBP1,CCT7,MRPL9,EIF4E,PABPC1,LSM7,CNBP,NPM1,LSM2,SRSF2,TUFM,PA2G4,RFC4,RRM1,TCP1,HNRNPA2B1,GS…
HALLMARK_INTERFERON_GAMMA_RESPONSE	195	0.726463	1.66835	0	0.00199335	0.004	1966	tags=41%, list=10%, signal=45%	CASP1,STAT3,CD86,SOCS3,IL10RA,CDKN1A,CD274,CD38,TRAFD1,XCL1,PDE4B,IFI44,STAT2,IFI44L,GBP4,CMKLR1,FGL2,USP18,PLSCR1,EPSTI1,TNFAIP2,TAP1,IFIT2,C1R,APOL6,IRF1,STAT4,MX2,SRI,GBP6,MX1,HLA-A,STAT1,TNFSF10,MVP,SOCS1,IL6,BPGM,OASL,OAS3,CD40,ZNFX1,EIF4E3,CMTR1,UBE2L6,IRF8,LAP3,B2M,ARID5B,IFIT1,NAMPT,CD69,ISG20,IFI35,IL18BP,ZBP1,OAS2,IFIH1,RTP4,TNFAIP3,IRF9,DDX60,RNF31,GCH1,IFI27,RSAD2,RNF213,CXCL9,SLAMF7,…
HALLMARK_E2F_TARGETS	198	-0.660439	-1.71498	0	0.00284606	0.005	3409	tags=64%, list=17%, signal=76%	TBRG4,DSCC1,LBR,PRPS1,USP1,ASF1A,ILF3,NME1,UBE2S,TIPIN,SPC25,CDC25A,NUP107,DCLRE1B,NCAPD2,ORC2,MMS22L,PSIP1,PRKDC,SMC4,CNOT9,PTTG1,MCM4,KPNA2,CENPE,CENPM,CTPS1,RNASEH2A,RFC3,PAICS,RANBP1,CDKN3,TACC3,RAD1,TFRC,UBE2T,SMC3,SRSF2,HMGA1,SNRPB,RAD21,PA2G4,CIT,WDR90,GSPT1,WEE1,CDC25B,JPT1,DLGAP5,MCM2,DUT,TOP2A,SPAG5,MAD2L1,DNMT1,MSH2,CDC20,SRSF1,MCM7,PLK4,ING3,CKS1B,SMC1A,BUB1B,CDK1,POLE,UNG,MCM3,SSRP1,…
HALLMARK_MYC_TARGETS_V2	57	-0.741133	-1.63594	0	0.00798919	0.023	3748	tags=72%, list=19%, signal=88%	PPRC1,GNL3,WDR74,NIP7,SUPV3L1,TBRG4,UTP20,CBX3,RABEPK,NOP2,RCL1,PPAN,MCM4,LAS1L,NPM1,NDUFAF4,PRMT3,TCOF1,WDR43,PA2G4,RRP9,HSPD1,HSPE1,AIMP2,SORD,BYSL,GRWD1,PLK4,PUS1,MYBBP1A,SLC19A1,UNG,NOP16,MCM5,PLK1,EXOSC5,TFB2M,MRTO4,NOP56,NOLC1,DCTPP1,IMP4,MAP3K6,
HALLMARK_G2M_CHECKPOINT	196	-0.594929	-1.54929	0	0.0204712	0.078	3247	tags=58%, list=16%, signal=69%	WRN,TTK,ILF3,HNRNPU,UBE2S,TLE3,CDC25A,CHMP1A,G3BP1,DTYMK,POLQ,SMARCC1,SMC4,PTTG1,STIL,HSPA8,KPNA2,CDC45,CENPE,RPS6KA5,HMGN2,PBK,GINS2,CDKN3,TACC3,CUL4A,SRSF2,HMGA1,SRSF10,E2F1,MTF2,RAD21,NDC80,GSPT1,CDC25B,JPT1,MCM2,TOP2A,NUP98,FBXO5,CCNA2,MAD2L1,CDC20,SRSF1,PLK4,CKS1B,SMC1A,NUP50,CENPF,CDC7,NSD2,CDK1,POLE,ODF2,MCM3,KIF11,UCK2,TROAP,PRC1,MCM5,PLK1,STMN1,SMC2,MKI67,SUV39H1,BARD1,TMPO,CHEK1,TPX2,KN…
HALLMARK_HYPOXIA	188	0.661215	1.5283	0	0.0293547	0.138	2024	tags=28%, list=10%, signal=31%	RORA,DPYSL4,SDC4,HSPA5,CDKN1A,RRAGD,TMEM45A,SIAH2,PDGFB,HDLBP,SLC2A5,STC2,KLF6,IER3,MT1E,XPNPEP1,ATP7A,VLDLR,MXI1,CHST2,S100A4,HS3ST1,GBE1,ATF3,NAGK,PLAUR,IDS,EFNA1,SLC2A3,IL6,CAV1,P4HA1,GYS1,CAVIN1,ISG20,KDELR3,PAM,DDIT3,TNFAIP3,GPC4,KLF7,TPBG,ADORA2B,PNRC1,EXT1,PDK1,BTG1,MT2A,PDK3,PGM1,SERPINE1,RBPJ,P4HA2,
HALLMARK_COMPLEMENT	183	0.660053	1.53451	0.00137931	0.0295242	0.113	2268	tags=26%, list=11%, signal=29%	CASP1,DOCK10,HSPA5,PRCP,DOCK9,CR2,DPP4,APOBEC3F,FYN,PDGFB,DUSP5,LIPA,APOBEC3G,PLSCR1,KCNIP2,C4BPB,XPNPEP1,C1R,FN1,IRF1,BRPF3,PIK3CG,PLAUR,CTSS,GZMB,IL6,CBLB,LAP3,LGALS3,LYN,CTSO,CTSB,CR1,HPCAL4,TNFAIP3,CTSD,CEBPB,MSRB1,TFPI2,LRP1,LTA4H,SERPINE1,IRF7,STX4,ME1,PLAT,F5,GPD2,
HALLMARK_P53_PATHWAY	192	0.669429	1.54356	0.00391645	0.033627	0.096	1937	tags=29%, list=10%, signal=31%	APP,CASP1,CDKN1A,TRAFD1,TM7SF3,KIF13B,CCND2,ABHD4,ISCU,WRAP73,PHLDA3,SEC61A1,RB1,DRAM1,BTG2,SLC7A11,PLXNB2,TAP1,AEN,IER3,GADD45A,STOM,TNFSF9,VDR,S100A4,MKNK2,ATF3,ADA,ZFP36L1,F2R,RGS16,MXD1,SOCS1,XPC,VWA5A,EI24,DDB2,PLK2,LIF,FBXW7,PLK3,GM2A,SAT1,NOTCH1,TCN2,DDIT3,TSPYL2,ZMAT3,TRIAP1,CD82,CTSD,BTG1,POLH,RAP2B,TAX1BP3,
HALLMARK_IL2_STAT5_SIGNALING	195	0.637375	1.48529	0.00796813	0.0498905	0.261	1249	tags=25%, list=6%, signal=26%	TIAM1,RORA,GUCY1B1,CD86,IL10RA,RRAGD,IL10,ABCB1,SNX9,CCND2,MAPKAPK2,XBP1,DHRS3,CSF1,IFNGR1,GBP4,SYT11,CKAP4,FGL2,KLF6,TLR7,PLSCR1,ADAM19,IL18R1,NFKBIZ,TNFRSF9,BMPR2,IL2RA,IGF2R,AHR,PTGER2,TNFSF10,RGS16,MXD1,SOCS1,SLC2A3,BCL2L1,TNFRSF1B,P4HA1,ANXA4,PLPP1,LIF,GLIPR2,IRF8,CD83,TNFRSF21,ALCAM,CD44,
HALLMARK_APOPTOSIS	155	0.638922	1.4466	0.0128388	0.0748392	0.418	2251	tags=33%, list=11%, signal=37%	APP,CASP1,PAK1,NEDD9,CDKN1A,CD38,FEZ1,CCND1,CCND2,IFNGR1,BTG2,CTH,ERBB2,TAP1,IER3,DNAJC3,GADD45A,IGF2R,IRF1,NEFH,ADD1,ATF3,TNFSF10,F2R,BTG3,BCL2L1,IL6,MCL1,CAV1,DAP,CD44,LGALS3,BMF,SAT1,HGF,CD69,ISG20,DDIT3,IL1B,GCH1,GPX1,TGFBR3,BCL2L11,ERBB3,FDXR,BIRC3,PLAT,PEA15,SMAD7,PDGFRB,SATB1,
HALLMARK_PROTEIN_SECRETION	94	0.6658	1.43381	0.0186246	0.0773957	0.472	3062	tags=33%, list=15%, signal=39%	SEC24D,DST,SEC31A,SEC22B,ARFGAP3,COPB2,TMED2,ATP7A,STX7,IGF2R,LMAN1,ARCN1,BNIP3,DOP1A,PAM,USO1,TMED10,STX16,COPE,COPB1,RAB5A,GBF1,OCRL,NAPA,GOSR2,AP2B1,ERGIC3,CLN5,CLTC,TOM1L1,SNX2,
HALLMARK_TNFA_SIGNALING_VIA_NFKB	198	0.60613	1.40579	0.0158311	0.0956969	0.588	2190	tags=37%, list=11%, signal=42%	SOCS3,SDC4,CDKN1A,KLF9,CCND1,TUBB2A,TRIB1,PDE4B,FOSL1,SMAD3,CSF1,DUSP5,KLF10,DRAM1,BTG2,KLF6,TNFAIP2,TAP1,IER3,GADD45A,IFIT2,ID2,TNFRSF9,TNFSF9,IRF1,ATF3,IL12B,PLAUR,ZBTB10,BTG3,MXD1,EFNA1,SLC2A3,IL6,LITAF,TNIP1,B4GALT1,MCL1,PLK2,G0S2,BCL6,JAG1,LIF,SIK1,CD83,CD44,SAT1,TRIP10,ZC3H12A,NAMPT,CD69,IFIH1,TNFAIP3,IL1B,GPR183,BCL3,SERPINB8,GCH1,PNRC1,CEBPB,MARCKS,BTG1,KDM6B,ICAM1,SERPINE1,DUSP2,MSC,DENN…
HALLMARK_ANGIOGENESIS	29	0.745423	1.3706	0.0840336	0.12748	0.728	1510	tags=24%, list=8%, signal=26%
HALLMARK_UNFOLDED_PROTEIN_RESPONSE	110	0.612843	1.34543	0.0475504	0.139664	0.816	1763	tags=27%, list=9%, signal=30%
HALLMARK_ALLOGRAFT_REJECTION	181	0.584974	1.33385	0.042953	0.14475	0.859	1966	tags=27%, list=10%, signal=29%
HALLMARK_INFLAMMATORY_RESPONSE	183	0.588195	1.3491	0.0249671	0.146767	0.805	2196	tags=34%, list=11%, signal=38%
HALLMARK_KRAS_SIGNALING_UP	173	0.568998	1.31001	0.0565276	0.167254	0.915	2527	tags=24%, list=13%, signal=28%
HALLMARK_PI3K_AKT_MTOR_SIGNALING	101	0.606917	1.28887	0.0697674	0.189755	0.957	1708	tags=15%, list=8%, signal=16%
HALLMARK_IL6_JAK_STAT3_SIGNALING	82	0.590613	1.24349	0.148311	0.262605	0.993	1808	tags=34%, list=9%, signal=37%
HALLMARK_MTORC1_SIGNALING	198	0.533593	1.23175	0.101078	0.27012	0.995	2366	tags=23%, list=12%, signal=26%
HALLMARK_ESTROGEN_RESPONSE_EARLY	182	0.529985	1.21606	0.120482	0.286724	0.999	1441	tags=17%, list=7%, signal=18%
HALLMARK_PANCREAS_BETA_CELLS	27	0.626703	1.15383	0.297297	0.353694	1	2476	tags=22%, list=12%, signal=25%
HALLMARK_KRAS_SIGNALING_DN	151	0.51303	1.15737	0.206612	0.362959	1	2927	tags=28%, list=15%, signal=32%
HALLMARK_ANDROGEN_RESPONSE	96	0.536493	1.16421	0.222857	0.364561	1	1406	tags=19%, list=7%, signal=20%
HALLMARK_GLYCOLYSIS	190	0.507696	1.16648	0.168449	0.378005	1	2203	tags=25%, list=11%, signal=28%
HALLMARK_MYOGENESIS	173	0.482945	1.09465	0.295946	0.473382	1	2124	tags=17%, list=11%, signal=19%
HALLMARK_EPITHELIAL_MESENCHYMAL_TRANSITION	176	-0.424159	-1.0993	0.235294	0.605671	0.989	784	tags=8%, list=4%, signal=8%
HALLMARK_XENOBIOTIC_METABOLISM	169	0.444243	1.00845	0.431788	0.625925	1	2129	tags=17%, list=11%, signal=18%
HALLMARK_APICAL_SURFACE	42	0.531571	1.0107	0.450704	0.645057	1	1261	tags=17%, list=6%, signal=18%
HALLMARK_DNA_REPAIR	149	0.452335	1.01587	0.418792	0.656651	1	1864	tags=9%, list=9%, signal=10%
HALLMARK_NOTCH_SIGNALING	32	-0.45293	-0.918296	0.57868	0.683266	1	1508	tags=22%, list=7%, signal=24%
HALLMARK_ESTROGEN_RESPONSE_LATE	176	0.423505	0.966013	0.534458	0.707709	1	1441	tags=17%, list=7%, signal=18%
HALLMARK_OXIDATIVE_PHOSPHORYLATION	198	-0.419674	-1.10185	0.225	0.717928	0.988	3967	tags=28%, list=20%, signal=34%
HALLMARK_PEROXISOME	98	0.437523	0.942316	0.57563	0.718291	1	1712	tags=16%, list=9%, signal=18%
HALLMARK_ADIPOGENESIS	191	-0.351287	-0.922262	0.67451	0.726315	1	1901	tags=12%, list=9%, signal=13%
HALLMARK_HEME_METABOLISM	183	0.417797	0.948775	0.560709	0.727567	1	2041	tags=20%, list=10%, signal=22%
HALLMARK_COAGULATION	116	0.416867	0.915262	0.62379	0.758085	1	2180	tags=19%, list=11%, signal=21%
HALLMARK_MITOTIC_SPINDLE	199	-0.359971	-0.928266	0.619048	0.771209	1	1616	tags=23%, list=8%, signal=25%
HALLMARK_HEDGEHOG_SIGNALING	34	-0.454697	-0.944259	0.553659	0.786502	1	596	tags=12%, list=3%, signal=12%
HALLMARK_TGF_BETA_SIGNALING	53	0.419779	0.847449	0.702703	0.83125	1	2435	tags=26%, list=12%, signal=30%
HALLMARK_APICAL_JUNCTION	182	0.360954	0.832385	0.826087	0.836777	1	2135	tags=15%, list=11%, signal=17%
HALLMARK_CHOLESTEROL_HOMEOSTASIS	70	0.423726	0.86876	0.701515	0.837483	1	2615	tags=34%, list=13%, signal=39%
HALLMARK_FATTY_ACID_METABOLISM	138	0.382349	0.856663	0.736477	0.837693	1	2324	tags=19%, list=12%, signal=21%
HALLMARK_BILE_ACID_METABOLISM	94	-0.352968	-0.83388	0.811145	0.843933	1	1198	tags=7%, list=6%, signal=8%
HALLMARK_REACTIVE_OXYGEN_SPECIES_PATHWAY	49	-0.431388	-0.95091	0.511936	0.848004	1	1198	tags=20%, list=6%, signal=22%
HALLMARK_UV_RESPONSE_UP	150	0.356002	0.805595	0.855246	0.862272	1	1967	tags=17%, list=10%, signal=18%
HALLMARK_UV_RESPONSE_DN	139	-0.390226	-0.98756	0.481061	0.927787	1	1061	tags=11%, list=5%, signal=11%
HALLMARK_SPERMATOGENESIS	110	-0.392079	-0.951782	0.553798	0.95056	1	1827	tags=18%, list=9%, signal=20%
HALLMARK_WNT_BETA_CATENIN_SIGNALING	41	0.347152	0.67549	0.923701	0.980241	1	2401	tags=22%, list=12%, signal=25%

## Sheet: Cohort GSEA
Pathway	p value	q value	log2(err)	ES	NES	Size	Leading_edge	Rank_metric
HALLMARK_INTERFERON_GAMMA_RESPONSE	1.97002e-26	9.65308e-25	1.3345	0.386572	8.5593	191	IFI27, BPGM, IFI44L, MX1, FCGR1A, IFITM3, GZMA, IFI44, CXCL10, RSAD2, USP18, ISG15, CXCL9, CMKLR1, CCL5, IFNAR2, CD274, MX2, IRF7, PLSCR1, CMPK2, IFIT1, ICAM1, MT2A, SOCS3, BATF2, OAS3, LY6E, IFIT3, SLAMF7, LAP3, TNFAIP6, SELP, MTHFD2, RTP4, PNP, TNFSF10, EPSTI1, ZBP1, GCH1, IL15RA, B2M, IFIT2, VAMP8, ARL4A, CDKN1A, IFI35, PSMA2, OAS2, FAS, DHX58, MYD88, NAMPT, CD69, IFITM2, PSMA3, DDX60, KLRK1, …	T21_vs_Control_FoldChange
HALLMARK_HEME_METABOLISM	2.66925e-20	6.53967e-19	1.16907	0.341988	7.54692	189	CA1, BCAM, HBD, GYPB, RHAG, AHSP, XK, SNCA, TSPO2, SELENBP1, OSBP2, RAP1GAP, BPGM, ALAS2, SLC4A1, ACKR1, TRIM58, KLF1, EPB42, TNS1, TRIM10, FECH, MYL4, SLC6A9, SLC6A8, TAL1, CTSE, HBB, RHCE, SPTA1, FBXO7, KEL, TMCC2, DMTN, BLVRB, TENT5C, GLRX5, SPTB, ADIPOR1, RBM38, SMOX, HBQ1, E2F2, ICAM4, MXI1, TSPAN5, HMBS, ABCG2, PDZK1IP1, GATA1, SLC25A37, HAGH, ARHGEF12, GYPC, ANK1, MKRN1, BSG, OPTN, RIOK3, …	T21_vs_Control_FoldChange
HALLMARK_INTERFERON_ALPHA_RESPONSE	2.7683e-19	4.52156e-18	1.13309	0.460077	7.3976	95	IFI27, GMPR, IFI44L, MX1, IFITM3, IFI44, CXCL10, RSAD2, USP18, ISG15, IRF7, PLSCR1, CMPK2, IFITM1, BATF2, CCRL2, LY6E, IFIT3, LAP3, RTP4, PROCR, EPSTI1, OAS1, B2M, LPAR6, IFIT2, IFI35, DHX58, IFITM2, PSMA3, DDX60, IFIH1, MOV10, PSME2, IL15, NMI, BST2, HERC6, CASP1, TRIM25, PSMB8, PARP9, UBE2L6, NCOA7, LAMP3, EIF2AK2, GBP4, PARP12, TRIM21, PARP14, TRAFD1, SAMD9L, STAT2, SAMD9, CSF1, CMTR1, OASL, H…	T21_vs_Control_FoldChange
HALLMARK_INFLAMMATORY_RESPONSE	7.62677e-18	9.34279e-17	1.08644	0.348999	7.17527	160	OLR1, MSR1, SCARF1, CXCL8, SERPINE1, OSM, IL10, GP1BA, CXCL10, TNFSF15, ICAM4, CXCL9, ITGB8, CMKLR1, CCL5, PROK2, SCN1B, MARCO, C3AR1, IFNAR1, IRF7, IFNGR2, TLR3, ADORA2B, IFITM1, ICAM1, FZD5, CCRL2, LY6E, ITGB3, TNFAIP6, SLC4A4, NMUR1, IL1B, CD70, TIMP1, ADM, HBEGF, RTP4, TNFSF10, LDLR, GCH1, IL15RA, CLEC5A, IL18RAP, PTGER2, CD14, SPHK1, CDKN1A, AXL, FFAR2, TLR2, CXCL6, NAMPT, CD69, IL18, IRAK2,…	T21_vs_Control_FoldChange
HALLMARK_OXIDATIVE_PHOSPHORYLATION	7.7087e-17	7.55453e-16	1.05746	0.307667	6.92486	199	ATP5PF, ATP5PO, NDUFA4, ATP5F1E, TIMM8B, UQCR11, ISCA1, NDUFS4, NDUFB3, COX6C, COX7B, COX7C, UQCRQ, COX7A2, NDUFA6, NDUFB2, UQCRB, ATP5F1C, ATP5ME, IDH2, NDUFA5, CYB5R3, ATP5MG, LDHA, ETFA, ACAT1, NDUFA1, ATP6V0C, NDUFB7, COX6A1, HTRA2, ATP5MF, TIMM10, ATP6V1G1, COX17, TCIRG1, ATP6V0E1, UQCRH, BDH2, COX6B1, MRPL15, MRPL11, ATP5PB, GPX4, COX7A2L, COX5A, TIMM17A, MRPS22, NDUFAB1, MDH1, VDAC3, ATP6V…	T21_vs_Control_FoldChange
HALLMARK_TNFA_SIGNALING_VIA_NFKB	8.10484e-12	6.61895e-11	0.875325	0.265761	5.73527	179	OLR1, SERPINE1, BMP2, G0S2, TUBB2A, BCL2A1, CXCL10, BTG3, MSC, ETS2, ATF3, CCL5, RCAN1, IFNGR2, SDC4, MARCKS, GFPT2, ICAM1, DUSP5, SOCS3, CCRL2, CXCL1, PHLDA1, TNF, TNFAIP6, IL1B, CCL4, HBEGF, DUSP4, LDLR, SAT1, GCH1, IL15RA, IFIT2, SPHK1, CDKN1A, CEBPB, KLF10, MAP2K3, SLC2A3, SIK1, TSC22D1, TLR2, CXCL6, KLF4, NAMPT, CD69, EGR1, LITAF, IL18, TNFSF9, IFIH1, EGR3, PTGS2, PLAUR, BHLHE40, TNFRSF9, JU…	T21_vs_Control_FoldChange
HALLMARK_ALLOGRAFT_REJECTION	2.42194e-10	1.69536e-09	0.814036	0.250903	5.33018	172	ACHE, IFNG, KRT1, IL10, C2, GZMA, DYRK3, CXCL9, CCL5, IFNAR2, PF4, F2R, IRF7, IFNGR2, TLR3, ITGB2, ELANE, RPS3A, ICAM1, GZMB, TNF, FASLG, RPL39, RPL9, IL1B, TIMP1, CCL4, CXCR3, CD8A, KLRD1, PRF1, CDKN2A, B2M, SRGN, IL18RAP, CCR5, GPR65, FGR, FAS, TLR2, IGSF6, TGFB1, NCR1, CCR1, IL18, IL12RB1, NME1, IL15, TLR1, CD3D, STAT4, PSMB10, CCR2, JAK2, FLNA, CD2, CD8B, NCF4, TLR6, ACVR2A, NLRP3, MRPL3, CD8…	T21_vs_Control_FoldChange
HALLMARK_IL6_JAK_STAT3_SIGNALING	1.42379e-09	8.72074e-09	0.788187	0.369244	5.06338	69	CXCL10, ACVRL1, CXCL9, IL10RB, PF4, IFNAR1, IFNGR2, SOCS3, CXCL1, TNF, ITGB3, IL1B, IL15RA, TNFRSF12A, CD14, CD36, FAS, TLR2, TGFB1, MYD88, CCR1, IL12RB1, PIM1, TNFRSF1B, HMOX1, LTBR, BAK1, PDGFC, CSF2RB, IL13RA1, IL2RG, STAT1, SOCS1, STAT2, CSF3R, CSF1, IFNGR1, IL18R1, HAX1, IL1R2, PTPN2, CSF2RA, CD38, IL7, TNFRSF1A, IRF9, MAP3K8, JUN, ITGA4, STAT3, TNFRSF21, IRF1, STAM2	T21_vs_Control_FoldChange
HALLMARK_MTORC1_SIGNALING	3.43812e-09	1.68468e-08	0.774939	0.225286	5.04848	196	PLOD2, PSMG1, HMBS, RRM2, ELOVL6, SLC1A5, ITGB2, CDC25A, PFKL, SLC7A5, DHCR24, EGLN3, GLRX, FADS2, MTHFD2, SLC1A4, SLC2A1, PSMA4, PNP, LDLR, IDI1, CDKN1A, GLA, INSIG1, EBP, MAP2K3, CTSC, SLC2A3, BUB1, SCD, NAMPT, PSMA3, PSMC6, PSME3, FADS1, GAPDH, LDHA, LTA4H, PSMC2, EEF1E1, BHLHE40, ARPC5L, CCNF, SEC11A, PPA1, TUBG1, PPIA, DDIT3, PLK1, PSMD14, AURKA, P4HA1, STARD4, SDF2L1, FDXR, XBP1, DAPP1, TM7…	T21_vs_Control_FoldChange
HALLMARK_IL2_STAT5_SIGNALING	2.86165e-09	1.55801e-08	0.774939	0.233029	5.0397	180	BCL2L1, BMP2, TGM2, IL10, IFITM3, CXCL10, SH3BGRL2, GUCY1B1, HOPX, BATF3, NCS1, GATA1, CDCP1, BATF, SLC1A5, EMP1, TNFRSF18, CST7, PLSCR1, SCN9A, TNFRSF4, MUC1, ST3GAL4, PHLDA1, SYT11, SELP, TIAM1, CDKN1C, PNP, TNFSF10, GSTO1, PTGER2, GPR65, ARL4A, TNFRSF8, ODC1, CISH, SLC2A3, EOMES, CDC6, GALM, PTCH1, FAH, CD48, IL10RA, RGS16, CASP3, PIM1, BHLHE40, AHNAK, TNFRSF9, TNFRSF1B, P4HA1, RHOB, MAFF, GLI…	T21_vs_Control_FoldChange
HALLMARK_ESTROGEN_RESPONSE_LATE	2.29744e-08	1.02341e-07	0.733762	0.251922	4.84947	141	LTF, BLVRB, GPER1, PRSS23, TMPRSS3, CCNA1, CHST8, OLFM1, MDK, BTG3, PRKAR2B, CHPT1, BATF, BAG1, PTGES, SLC27A2, CDC20, SLC7A5, SIAH2, TOP2A, CAV1, PAPSS2, PLAAT3, MYOF, KCNK5, CACNA2D2, RBBP8, DLG5, COX6C, FABP5, TIAM1, PERP, SLC1A4, GINS2, CKB, S100A9, PPIF, NRIP1, GLA, NBL1, CISH, LLGL2, ABCA3, KLF4, CDC6, RET, PLK4, IDH2, EGR3, TFF3, ATP2B4, STIL, TPBG, DNAJC1, JAK2, SERPINA1, ID2, TST, XBP1, …	T21_vs_Control_FoldChange
HALLMARK_APOPTOSIS	6.34451e-08	2.39139e-07	0.704976	0.242513	4.70251	144	PDGFRB, BCL2L1, BMP2, AVPR1A, GPX1, LGALS3, IFITM3, CCNA1, ERBB2, BTG3, ATF3, SOD1, EMP1, F2R, TOP2A, CAV1, BNIP3L, TNF, FASLG, IL1B, TGFBR3, ANXA1, TIMP1, APP, LMNA, TNFSF10, PRF1, SAT1, GCH1, BIK, TNFRSF12A, AIFM3, CD14, CDKN1A, PEA15, EBP, FAS, PMAIP1, PPP2R5B, CD69, IL18, HMGB2, EGR3, GNA15, CASP3, ANKH, CASP1, CD2, DDIT3, FEZ1, CLU, BCL2L11, HMOX1, DNAJA1, RHOB, CASP4, FDXR, BID, GPX4, TSPO,…	T21_vs_Control_FoldChange
HALLMARK_EPITHELIAL_MESENCHYMAL_TRANSITION	6.34451e-08	2.39139e-07	0.704976	0.260725	4.60001	116	MMP1, OXTR, PDGFRB, PLOD2, MYL9, CXCL8, SERPINE1, SLC6A8, CALD1, TGM2, COL6A2, MYLK, LOXL1, IGFBP3, COL5A1, SDC4, LGALS1, ITGB5, CXCL1, TPM1, ITGB3, TGFBR3, TIMP1, CADM1, GAS1, SAT1, DAB2, TNFRSF12A, TAGLN, FAS, CXCL6, TGFB1, FSTL3, BMP1, ITGB1, IL15, PLAUR, TPM4, PLOD1, FLNA, RHOB, ID2, EMP3, COL8A2, CAPG, THBS1, PCOLCE, COLGALT1, PPIB, IL32, DST, SPP1, GADD45B, QSOX1, GPC1, ACTA2, SPARC, SGCB, …	T21_vs_Control_FoldChange
HALLMARK_ADIPOGENESIS	7.53514e-07	2.6373e-06	0.659444	0.200939	4.30005	176	RETN, CMBL, ATP5PO, MYLK, SLC19A1, ELOVL6, RNF11, STOM, AGPAT3, SOD1, SLC1A5, ITSN1, CRAT, PFKL, CDKN2C, RIOK3, UQCR11, ADCY6, COX7B, UQCRQ, CAVIN2, ARL4A, CD36, CD151, PIM3, ITGA7, NDUFA5, FAH, COQ5, MGLL, DGAT1, NDUFB7, COX6A1, SCP2, SORBS1, SLC66A3, MRPL15, PFKFB3, GPX4, TST, TANK, RAB34, REEP5, NDUFAB1, BCL6, BCL2L13, UBC, MGST3, RMDN3, IFNGR1, SQOR, UQCR10, ACADM, IDH1, COX8A, RETSAT, CPT2, …	T21_vs_Control_FoldChange
HALLMARK_MYOGENESIS	1.15511e-06	3.77335e-06	0.643552	0.235033	4.26505	122	ACHE, MYL4, SLC6A8, DENND2B, COL6A2, FKBP1B, NCAM1, MYLK, IGFBP3, GNAO1, BAG1, CRAT, AK1, ITGB5, TNNT1, KIFC3, PPFIA4, HBEGF, APP, CKB, TNNC2, MRAS, IGFBP7, ACSL1, SPHK1, CDKN1A, CD36, TAGLN, MYBPC3, FOXO4, PYGM, TGFB1, SCD, PTP4A3, RYR1, ITGA7, NQO1, PDLIM7, GABARAPL2, MYL6B, ITGB1, KLF5, BHLHE40, SORBS1, EPHB3, CLU, CHRNB1, SMTN, FHL1	T21_vs_Control_FoldChange
HALLMARK_MYC_TARGETS_V1	4.4588e-06	1.36551e-05	0.610527	0.178605	4.01998	199	GSPT1, TYMS, RPL34, CDC20, CDC45, U2AF1, PSMA6, TFDP1, SNRPG, PSMA4, PRDX4, HDGF, ODC1, CCNA2, PSMA2, SNRPD2, EEF1B2, HDDC2, PSMC6, NME1, LDHA, ERH, YWHAQ, MAD2L1, RPS10, PPIA, PSMD14, ACP1, RPL6, H2AZ1, VBP1, COX5A, PGK1, NDUFAB1, VDAC3, KPNA2, PCNA, MCM4, HSPE1, PA2G4, PHB, CBX3, SRPK1, LSM7, PSMA7, CCT2, CLNS1A, PSMB3, GLO1, RAN, AP3S1, EIF2S2, DUT, PSMD8, SSB, UBE2E1, SNRPB2, SNRPD1, RPLP0, R…	T21_vs_Control_FoldChange
HALLMARK_REACTIVE_OXYGEN_SPECIES_PATHWAY	1.63363e-05	4.7087e-05	0.57561	0.338943	3.98654	49	SOD1, CDKN2D, GLRX, PRDX6, PRDX4, PRDX2, NDUFA6, SCAF4, FTL, NQO1, JUNB, GPX4, MPO, TXNRD2, PTPA, GLRX2, SRXN1, PRDX1, SELENOS, GCLM, PFKP, SBNO2, TXN, PDLIM1, GCLC, GSR, ATOX1, LSP1, ERCC2, G6PD, OXSR1, PRNP, HMOX2, NDUFB4, EGLN2, LAMTOR5, TXNRD1, GPX3	T21_vs_Control_FoldChange
HALLMARK_COMPLEMENT	2.35967e-05	6.08547e-05	0.57561	0.184061	3.86163	167	MMP8, OLR1, C1QC, SERPINE1, LTF, C1QA, LGALS3, DOCK4, C2, GZMA, GP1BA, GP9, FCER1G, CCL5, IRF7, USP16, PLSCR1, APOBEC3G, DUSP5, GZMB, CXCL1, CASP5, LAP3, TIMP1, F8, S100A13, CTSL, S100A9, S100A12, GNGT2, CD36, SRC, CEBPB, GZMK, CTSC, ADAM9, LTA4H, PLAUR, PRCP, CASP3, CTSB, CFH, PIM1, CTSH, JAK2, XPNPEP1, PLEK, CASP1, PLA2G4A, CLU, SERPINA1, MAFF, CASP4, KYNU, ANXA5, SERPING1, CSRP1, CASP7, PRKCD,…	T21_vs_Control_FoldChange
HALLMARK_KRAS_SIGNALING_UP	2.35967e-05	6.08547e-05	0.57561	0.19496	3.78042	144	TMEM158, BPGM, RETN, PLEK2, BMP2, G0S2, TFPI, PPBP, SLPI, PDCD1LG2, PLVAP, CXCL10, PCSK1N, FCER1G, GNG11, IGFBP3, CMKLR1, SCN1B, GYPC, EMP1, C3AR1, ITGB2, AKAP12, GFPT2, MAFB, GLRX, LY96, IL1B, HBEGF, ACE, HKDC1, GADD45G, F13A1, NAP1L2, KLF4, EPB41L3, PTGS2, IL10RA, RGS16, PLAUR, CLEC4A, CFH, PRDM1, ANKH, TNFRSF1B, PSMB8, USP12, ID2, NRP1, FBXO4, ADAM8, IL2RG, CAB39L, ENG, ARG1, CTSS, CA2, LAT2, …	T21_vs_Control_FoldChange
HALLMARK_FATTY_ACID_METABOLISM	7.27604e-05	0.000155011	0.538434	0.190653	3.61783	135	G0S2, CBR3, AOC3, CRAT, LGALS1, CBR1, DHCR24, PRDX6, IL4I1, IDI1, ACSL1, GPD1, HPGD, CD36, ODC1, YWHAH, PCBD1, UROD, BLVRA, LDHA, CRYZ, MGLL, GSTZ1, CA4, HSP90AA1, UBE2L6, NTHL1, H2AZ1, CEL, OSTC, UROS, MDH1, ACAA1, S100A10, ACAT2, CA2, PSME1, ACADM, IDH1, RETSAT, CPT2, REEP6, KMT5A, GRHPR, NBN, GLUL, ACOT8, CD1D, ACAA2, BPHL, EHHADH, RDH11, ACADS, SUCLG1, CCDC58, SUCLA2, MIF, RAP1GDS1, PTS, ECHS…	T21_vs_Control_FoldChange
HALLMARK_UV_RESPONSE_UP	7.95287e-05	0.000162371	0.538434	0.19302	3.59369	130	BMP2, SLC6A8, OLFM1, BTG3, CDC34, ATF3, BSG, HSPA13, GRINA, ICAM1, SLC6A12, HTR7, NAT1, CDKN1C, GCH1, PPIF, AP2S1, CREG1, UROD, RET, HYAL2, APOM, DGAT1, CASP3, JUNB, ARRB2, CLTB, BCL2L11, HMOX1, DNAJA1, RHOB, BAK1, BID, PSMC3, TST, PRKCD, SPR, ACAA1, GGH, FURIN, TUBA4A, PRKACA, SELENOW, CA2, TFRC, NR4A1, CYB5R1, TAP1, CEBPG, CNP, CYB5B, MGAT1, FOS, LYN, ATP6V1F, IGFBP2, TARS1, KCNH2, AQP3, PARP2,…	T21_vs_Control_FoldChange
HALLMARK_COAGULATION	0.000143972	0.000271332	0.518848	0.230524	3.54691	85	MMP1, MMP8, OLR1, SERPINE1, C1QA, CTSE, PRSS23, C2, GP1BA, GP9, C8G, PF4, ITGB3, ANXA1, TIMP1, F8, S100A13, PROS1, CAPN2, ADAM9, LTA4H, BMP1, CTSB, CFH, CTSH, PLEK, CLU, SERPINA1, MAFF, P2RY1, CAPN5, THBS1, SERPING1, SH2B2, CSRP1, FURIN, ARF4, CPQ, SPARC, MSRB2, F12, GNB2, FYN	T21_vs_Control_FoldChange
HALLMARK_E2F_TARGETS	5.3039e-05	0.000129946	0.557332	0.157027	3.51885	196	GSPT1, HMMR, CDK1, BIRC5, RRM2, MELK, DONSON, TK1, KIF4A, CDC20, PTTG1, CDC25A, CCNB2, MKI67, CKS2, DLGAP5, TOP2A, CDKN2C, CENPE, KIF18B, E2F8, CIT, SPC24, BUB1B, MTHFD2, CHEK1, CENPM, DSCC1, ESPL1, PRDX4, CDKN2A, CKS1B, BRCA2, CDCA3, TRIP13, CDKN1A, RAD51AP1, CDCA8, PHF5A, NAA38, SPAG5, GINS1, PLK4, AURKB, KIF2C, POLE4, UBE2T, NME1, HMGB2, HMGB3, MAD2L1, TUBG1, PLK1, AURKA, UBE2S, H2AZ1, ASF1B, …	T21_vs_Control_FoldChange
HALLMARK_HYPOXIA	6.82482e-05	0.000152007	0.538434	0.170655	3.46296	156	SELENBP1, SERPINE1, TGM2, MT1E, MXI1, IGFBP3, ATF3, COL5A1, ADORA2B, AKAP12, SDC4, PFKL, SIAH2, CAV1, MT2A, BNIP3L, CAVIN3, GLRX, PPFIA4, ADM, STBD1, SLC2A1, CDKN1C, TPST2, NEDD4L, SDC3, PRDX5, CDKN1A, SLC2A5, SLC2A3, PYGM, S100A4, WSB1, ANXA2, GAPDH, LDHA, PLAUR, TPBG, PIM1, BHLHE40, XPNPEP1, DDIT3, HMOX1, P4HA1, PFKFB3, MAFF, PGK1, NFIL3, SAP30, RORA, PFKP, DPYSL4, NDST1, IER3, PAM, GALK1, GPC1…	T21_vs_Control_FoldChange
HALLMARK_G2M_CHECKPOINT	6.3736e-05	0.000148717	0.538434	0.155917	3.44783	190	EGF, GSPT1, E2F2, HMMR, CDK1, BIRC5, TPX2, KIF4A, CDC20, PTTG1, CDC45, CDC25A, CCNB2, MKI67, CKS2, TROAP, SLC7A5, MARCKS, TOP2A, CDKN2C, CENPE, KIF11, MT2A, TTK, TFDP1, UBE2C, MEIS1, KIF15, CHEK1, GINS2, ESPL1, CKS1B, BRCA2, EXO1, E2F1, KNL1, ODC1, CCNA2, ATF5, PRC1, BUB1, MAPK14, CDC6, TGFB1, PLK4, AURKB, KIF2C, RAD54L, KIF23, HMGB3, NDC80, STIL, POLQ, PML, MAD2L1, CCNF, MNAT1, PLK1, AURKA, UBE2…	T21_vs_Control_FoldChange
HALLMARK_XENOBIOTIC_METABOLISM	0.000143972	0.000271332	0.518848	0.174486	3.37034	143	RAP1GAP, SERPINE1, BLVRB, SMOX, ETS2, SLC1A5, PTGES, GART, PAPSS2, MT2A, CBR1, SLC6A12, PTGDS, ARG2, DDAH2, PROS1, GSTO1, ABCC3, GCH1, PINK1, AKR1C3, HES6, CD36, ACP2, CYP2S1, FAS, PGRMC1, FAH, NQO1, UPP1, PYCR1, PSMB10, SERTAD1, SPINT2, HMOX1, ACP1, ID2, KYNU, AQP9, ASL, NPC1, ARG1, SSR3, CA2, CROT, SLC35B1, IDH1, CNDP2, HPRT1, CYB5A, RETSAT, TKFC, CASP6, GCLC, GSS, PDLIM5, JUP, ENTPD5, GCNT2, T…	T21_vs_Control_FoldChange
HALLMARK_CHOLESTEROL_HOMEOSTASIS	0.000609066	0.00106587	0.477271	0.233888	3.15565	67	AVPR1A, LGALS3, LSS, ATF3, PLSCR1, GLDC, FABP5, FADS2, FBXO6, LDLR, IDI1, ETHE1, TNFRSF12A, CXCL16, ATF5, EBP, SCD, PLAUR, ABCA2, CLU, STARD4, TM7SF2, ANXA5, NFIL3, S100A11, GUSB, PMVK, ACAT2, PCYT2, HMGCR, NIBAN1, MVD, CYP51A1, FDFT1, MVK	T21_vs_Control_FoldChange
HALLMARK_APICAL_JUNCTION	0.000526638	0.000955751	0.477271	0.15992	3.08898	143	CERCAM, MYL9, AMH, COL17A1, ICAM5, MDK, NRXN2, ICAM4, CD274, ADAMTS5, CRAT, CLDN5, ICAM1, TSPAN4, NEXN, BAIAP2, RRAS, CLDN9, SDC3, SRC, YWHAH, INSIG1, ADAM9, MAPK14, MAPK11, BMP1, ITGB1, CD209, MYL12B, ITGA9, VCL, PCDH1, NEGR1, TUBG1, ITGA10, ATP1A3, CD86, VASP, LAYN, ARPC2, LAMB3, LIMA1, IKBKG, NECTIN2, CD99, NECTIN3, CAP1, MAPK13, ITGB4, RHOF, MYH10, MAP3K20, ZYX, SKAP2, NECTIN1, MVD, PIK3R3, P…	T21_vs_Control_FoldChange
HALLMARK_ESTROGEN_RESPONSE_EARLY	0.00197942	0.00323305	0.431708	0.148967	2.91794	146	TGM2, FHL2, BLVRB, PRSS23, TMPRSS3, OLFM1, CHPT1, KRT8, BAG1, PTGES, SLC27A2, SLC7A5, SIAH2, PAPSS2, PLAAT3, MYOF, MUC1, KCNK5, SLC37A1, RBBP8, TIAM1, SLC1A4, SLC2A1, PPIF, NRIP1, GLA, NBL1, CISH, KLF10, WWC1, ABCA3, MYBL1, KLF4, PMAIP1, RET, SNX24, ENDOD1, EGR3, TFF3, TTC39A, TPBG, BHLHE40, JAK2, SYNGR1, MREG	T21_vs_Control_FoldChange
HALLMARK_GLYCOLYSIS	0.00102166	0.00172626	0.45506	0.137096	2.84936	164	PLOD2, B3GAT1, MXI1, HMMR, CDK1, IGFBP3, SOD1, COL5A1, ADORA2B, EGLN3, NDUFV3, GLRX, PPFIA4, CHST12, CLDN9, B4GALT2, SDC3, BIK, LDHA, TFF3, TPBG, SRD5A3, PLOD1, PPIA, NOL3, AURKA, P4HA1, CAPN5, CHPF, AKR1A1, IL13RA1, NANP, PGK1, SAP30, MDH1, GALK2, SLC16A3, MERTK, PFKP, DPYSL4, TXN, GUSB, GALE, PGLS, IER3, RARS1, PAM, GALK1, QSOX1, GPC1, BPNT1, ISG20, IDH1, TPI1, HAX1, CYB5A, ELF3, GOT1, CASP6, A…	T21_vs_Control_FoldChange
HALLMARK_PI3K_AKT_MTOR_SIGNALING	0.00290436	0.00459076	0.431708	0.172783	2.75821	91	CDK1, FASLG, MKNK1, TIAM1, DUSP3, SLC2A1, E2F1, CDKN1A, MAP2K3, AKT1S1, MYD88, ECSIT, PLA2G12A, DDIT3, AP2M1, DAPP1, IL2RG, TBK1, CAB39L, ARPC3, STAT2, PRKAG1, PIN1, RALB, ARHGDIA, UBE2N, CALR, UBE2D3, PIK3R3, PFN1, TNFRSF1A, SLA, PPP1CA, EIF4E, CFL1, TRIB3, GRK2, PTEN, ACTR2, RPS6KA1, NCK1, RIT1, TRAF2, NFKBIB, RAC1, ARF1, HSP90B1, HRAS, RIPK1, SQSTM1, CAB39, MKNK2, PRKAR2A, ACTR3, RPTOR, GRB2, …	T21_vs_Control_FoldChange
HALLMARK_P53_PATHWAY	0.00412711	0.00631963	0.407018	0.12283	2.64218	178	BMP2, PHLDA3, PDGFA, STOM, ATF3, H1-2, F2R, PRMT2, AK1, JAG2, STEAP3, H2AJ, ADA, PERP, BAIAP2, HBEGF, H2AW, APP, HINT1, ZNF365, PROCR, CDKN2A, SAT1, VDR, VAMP8, SPHK1, CDKN1A, FAS, TSC22D1, RALGDS, S100A4, KLF4, TGFB1, TNFSF9, TCN2, RGS16, TRIAP1, UPP1, RPS27L, SERTAD3, RHBDF2, CASP1, TPRKB, DDIT3, HMOX1, BAK1, FDXR, DDB2, RPS12, CGRRF1, PCNA, MAPKAPK3, TRAFD1, SOCS1, DRAM1, PLXNB2, S100A10, CD82…	T21_vs_Control_FoldChange
HALLMARK_DNA_REPAIR	0.00919171	0.0128684	0.38073	0.130768	2.56147	146	BCAM, GUK1, TYMS, AK1, RBX1, CMPK2, POLR2K, ADA, ADCY6, RAD51, PNP, POLL, PDE6G, POLE4, NME1, POLR1D, MRPL40, NT5C3A, COX17, GPX4, EIF1B, DDB2, POLR3GL, TAF13, CETN2, PCNA, GTF2A2, ZWINT, SUPT4H1, RPA3, GMPR2, GTF2B, TMED2, ARL6IP1, VPS28, RFC2, DUT, MPC2, HPRT1, SURF1, ITPA, POLR2J, DGCR8, DAD1, GTF2H5, SMAD5, ERCC8, MPG, NELFE, TAF10, VPS37B, POLR2G, POLB, POLR2I, FEN1, GTF2H1, ERCC2, POLR2H, T…	T21_vs_Control_FoldChange
HALLMARK_BILE_ACID_METABOLISM	0.00814552	0.0117391	0.38073	0.170352	2.52186	79	KLF1, SOD1, SLC27A2, OPTN, SOAT2, DHCR24, FADS2, BMP6, HSD3B7, IDI1, ACSL1, PRDX5, NEDD4, ABCA3, TFCP2L1, IDH2, FADS1, SCP2, ABCA2, PEX11G, FDXR, PEX11A, AQP9, PXMP2, NPC1, GCLM, ATXN1, CROT, IDH1, BCAR3, RETSAT, PAOX, SLC35B2, GSTK1, ABCD1, PEX7, NUDT12, ACSL5, PEX16, RXRA, HSD17B11, SLC22A18, PHYH, ABCD2, GNPAT, GNMT, PEX19, SULT1B1, PNPLA8	T21_vs_Control_FoldChange
HALLMARK_ANGIOGENESIS	0.0271854	0.0342657	0.352488	0.272718	2.33531	24	OLR1, PDGFA, PF4, JAG2, TIMP1, APP, S100A4, CXCL6, PGLYRP1, NRP1, SPP1, LRPAP1, VEGFA, VCAN, TNFRSF21, ITGAV, JAG1, FGFR1, CCND2, COL5A2	T21_vs_Control_FoldChange
HALLMARK_PROTEIN_SECRETION	0.027972	0.0342657	0.271289	0.141017	2.25113	91	SOD1, NAPA, GLA, AP2S1, CD63, CTSC, ICA1, AP2M1, TMX1, GNAS, VAMP3, GALC, VAMP7, TMED2, DST, YIPF6, PAM, KIF1B, AP3S1, BET1, CLTA, CAV2, COPE, AP2B1, M6PR, ANP32E, KRT18, RAB9A, TSG101, ARFGAP3, SEC24D, ARFIP1, NAPG, STX12, RAB22A, ARF1, VAMP4, VPS45, TMED10, ATP6V1H, COPB1, ERGIC3, YKT6, GOSR2, SEC22B, RER1, RAB5A, IGF2R, ADAM10, COPB2, LMAN1, PPT1, BNIP3, SGMS1, RAB2A, SNX2, CLCN3, ARCN1, SCAMP…	T21_vs_Control_FoldChange
HALLMARK_APICAL_SURFACE	0.027972	0.0342657	0.271289	0.231117	2.16547	29	GHRL, CD160, APP, GAS1, PLAUR, RTN4RL1, FLOT2, IL2RG, IL2RB, AKAP7, BRCA1, LYN, AFAP1L2, HSPB1, SULF2, B4GALT1, GATA3, MDGA1, ADAM10, CRYBG1, TMEM8B, ADIPOR2	T21_vs_Control_FoldChange
HALLMARK_PEROXISOME	0.0739261	0.0823268	0.161979	0.118835	1.86457	88	SOD1, SLC27A2, CRAT, TOP2A, DHCR24, FIS1, CADM1, HSD3B7, IDI1, ACSL1, PRDX5, YWHAH, IDH2, FADS1, SCP2, PEX11A, CEL, PEX2, TSPO, PRDX1, ACAA1, ATXN1, ITGB1BP1, ABCB9, MVP, IDH1, RETSAT, SLC25A19, SLC35B2, GSTK1, ACOT8, EHHADH, ABCD1, RDH11, CNBP, SLC25A4, NUDT19, HMGCL, ACSL5, HSD17B11, ECH1, HRAS, FDPS, ABCD2, ACSL4, GNPAT, PEX11B, STS, DHRS3, CTBP1, ACOX1, IDE, SOD2, ERCC1, ELOVL5, CDK7, CLN6	T21_vs_Control_FoldChange
HALLMARK_ANDROGEN_RESPONSE	0.0979021	0.106605	0.138805	0.114035	1.78925	88	ADAMTS1, KRT8, AKAP12, DHCR24, DBI, MAF, ABCC4, IDI1, SAT1, B2M, ELL2, HPGD, UBE2J1, INSIG1, TSC22D1, SCD, CENPN, FADS1, MYL12A, ANKH, UAP1, PA2G4, MERTK, STK39, RRP12, SRP19, H1-0, GNAI3, ABHD2, HMGCR, DNAJB9, PDLIM5, IQGAP2, STEAP4, RAB4A, GSR, CCND3, CDC14B, INPP4B, SPCS3, ADRM1, SEC24D, TMEM50A, VAPA, XRCC5, B4GALT1, ZMIZ1, ITGAV, SRF, LMAN1, PTK2B, ELOVL5, HMGCS1, NGLY1, NDRG1, NCOA4, GUCY1A…	T21_vs_Control_FoldChange
HALLMARK_SPERMATOGENESIS	0.122877	0.130891	0.122108	0.120663	1.67127	70	CCNA1, PCSK1N, PSMG1, CDK1, NCAPH, CCNB2, GFI1, TTK, ACE, SEPTIN4, ACRBP, ARL4A, CCT6B, SLC2A5, BUB1, KIF2C, PGS1, AURKA, RPL39L, PHF7, VDAC3, EZH2, NEFH	T21_vs_Control_FoldChange
HALLMARK_TGF_BETA_SIGNALING	0.132867	0.138521	0.116739	0.139841	1.62869	48	SERPINE1, BMP2, IFNGR2, LTBP2, CDKN1C, KLF10, TGFB1, JUNB, BMPR1A, ID2, PPM1A, THBS1, SMAD7, TGFBR1, ENG, FURIN, BCAR3, FKBP1A, UBE2D3, SLC20A1, PPP1CA, PPP1R15A	T21_vs_Control_FoldChange
HALLMARK_MITOTIC_SPINDLE	0.222777	0.222777	0.0852885	0.0620522	1.37393	191	DOCK4, CDK1, BIRC5, ANLN, SHROOM1, TPX2, ARHGEF12, KIF4A, ITSN1, CCNB2, DLGAP5, MARCKS, TOP2A, CENPE, CTTN, KIF11, TTK, CDC42BPA, PCNT, PIF1, TIAM1, KIF15, PCGF5, ESPL1, BRCA2, ECT2, OPHN1, ARHGAP10, PRC1, BUB1, CYTH2, KIF2C, KIF23, NDC80, PALLD, VCL, FGD4, FLNA, CDC42EP4, PLK1, BCL2L11, AURKA, CCDC88A, MAP3K11, TBCD, RACGAP1, TUBA4A, DST, LMNB1, KIF1B, ARHGEF3, RHOF, CLIP2, MYH10, CENPF, ARHGDIA…	T21_vs_Control_FoldChange
HALLMARK_NOTCH_SIGNALING	0.171828	0.175408	0.100279	-0.177259	-1.55704	27	HES1, CCND1, DTX1, DTX4, PRKCA, PPARD, NOTCH2, MAML2	T21_vs_Control_FoldChange
HALLMARK_MYC_TARGETS_V2	0.0689311	0.0785494	0.168238	-0.15131	-1.87489	58	SORD, HK2, SLC29A2, MYC, UTP20, RABEPK, NOLC1, PPRC1, NOP2, TCOF1, MYBBP1A, GRWD1, LAS1L, IPO4, DDX18, WDR43, PUS1, WDR74, RCL1, MPHOSPH10, TBRG4, DUSP2, FARSA, NOP56, HSPD1, PES1, CDK4, RRP9, EXOSC5, SUPV3L1	T21_vs_Control_FoldChange
HALLMARK_UNFOLDED_PROTEIN_RESPONSE	0.0659341	0.0769231	0.172324	-0.111722	-1.89814	107	DDIT4, EIF2AK3, TSPYL2, GEMIN4, WFS1, ASNS, NOLC1, DKC1, NOP14, CNOT4, FUS, EXOSC10, EEF2, DNAJC3, EDEM1, DCTN1, CNOT6, EDC4, NFYA, CXXC1, BAG3, TTC37, SLC30A5, DDX10, SEC31A, PARN, CNOT2, EXOSC2, NABP1, KHSRP, NOP56, HSPA9, DCP1A, ALDH18A1, RRP9, EXOSC5, IMP3, EIF4G1, EXOC2, ERN1, XPOT, IARS1, SDAD1, HERPUD1, MTREX, EIF4A3, EIF4A2, HYOU1, TATDN2, HSPA5, SRPRA, ERO1A, SRPRB, KIF5B, NPM1, BANF1, S…	T21_vs_Control_FoldChange
HALLMARK_UV_RESPONSE_DN	0.0519481	0.0620843	0.195789	-0.116761	-2.00508	110	VLDLR, SDC2, LAMC1, CDON, IRS1, PRKCA, KIT, VAV2, FBLN5, TOGARAM1, MYC, TGFBR2, PMP22, NOTCH2, DBP, YTHDC1, GRK5, PRKCE, PHF3, ATP2B1, NR1D2, CDK13, NIPBL, CACNA1A, ATRX, ATRN, NR3C1, AKT3, SYNJ2, SMAD3, MTA1, SIPA1L1, TENT4A, PRDM2, MAP2K5, RASA2, PIAS3, SCAF8, DLG1, SFMBT1, ATP2C1, CDKN1B, AGGF1, CELF2, BCKDHB, MIOS, NFKB1, WDR37, PIK3CD, ADD3	T21_vs_Control_FoldChange
HALLMARK_WNT_BETA_CATENIN_SIGNALING	0.0211777	0.0288252	0.352488	-0.219229	-2.26296	38	GNAI1, AXIN2, NKD1, LEF1, HEY1, TCF7, PPARD, MYC, DVL2, MAML1, CTNNB1, SKP2, NUMB, TP53, NCOR2, NOTCH4, FRAT1, PSEN2, KAT2A, ADAM17, HDAC2, CUL1, NCSTN	T21_vs_Control_FoldChange
HALLMARK_HEDGEHOG_SIGNALING	0.026973	0.0342657	0.276501	-0.257985	-2.26614	27	NRCAM, VLDLR, GLI1, SLIT1, HEY1, CDK5R1, NRP2, CELSR1, TLE1	T21_vs_Control_FoldChange
HALLMARK_KRAS_SIGNALING_DN	0.00702717	0.0104343	0.407018	-0.167683	-2.59002	86	EDAR, TCL1A, EDN1, EFHD1, SYNPO, CAMK1D, TAS2R4, TG, STAG3, PLAG1, LYPD3, UPK3B, ZBTB16, CCDC106, SLC5A5, CD40LG, NRIP2, DLK2, SLC25A23, NR6A1, SERPINB2, MYO15A, SIDT1, COQ8A, GAMT, TCF7L1, IDUA, SGK1	T21_vs_Control_FoldChange

## Sheet: D21 CAvsCtrl
NAME	SIZE	ES	NES	NOM p-val	FDR q-val	FWER p-val	RANK AT MAX	LEADING EDGE	Leading edge genes
HALLMARK_CHOLESTEROL_HOMEOSTASIS	66	0.907964	1.94434	0	0	0	629	tags=41%, list=4%, signal=43%	LDLR,SQLE,TMEM97,MVD,MVK,HMGCS1,CYP51A1,NSDHL,HMGCR,HSD17B7,LSS,ETHE1,FDFT1,SCD,DHCR7,GLDC,EBP,TM7SF2,ACAT2,IDI1,TP53INP1,PLAUR,ALCAM,PCYT2,FDPS,ANTXR2,NIBAN1
HALLMARK_ANDROGEN_RESPONSE	86	0.805189	1.79726	0	0	0	877	tags=21%, list=6%, signal=22%	SRF,PMEPA1,INSIG1,HMGCS1,HMGCR,SCD,MYL12A,IDI1,ELL2,ARID5B,DHCR24,RAB4A,ACSL3,FADS1,IQGAP2,SGK1,PDLIM5,SLC26A2
HALLMARK_MTORC1_SIGNALING	194	0.714571	1.70131	0	0.00312835	0.009	1195	tags=19%, list=8%, signal=20%	LDLR,SQLE,TMEM97,INSIG1,HMGCS1,CYP51A1,CXCR4,HMGCR,SCD,SLC1A4,IDH1,DHCR7,EBP,TM7SF2,IDI1,TES,RDH11,FGL2,DHCR24,ELOVL6,ACSL3,FADS1,NIBAN1,EDEM1,GGA2,GOT1,GSK3B,DDIT4,SC5D,ELOVL5,ADD3,DAPP1,BUB1,CYB5B,PNP,PIK3R3
HALLMARK_FATTY_ACID_METABOLISM	126	0.699398	1.62518	0.0012837	0.0137239	0.05	1105	tags=15%, list=8%, signal=16%	HMGCS1,NSDHL,HSD17B7,RETSAT,ACSL1,IDH1,MGLL,ACAT2,IDI1,RDH11,DHCR24,UGDH,ACADS,MDH1,ERP29,CPOX,ELOVL5,FASN,DECR1
HALLMARK_SPERMATOGENESIS	79	0.70513	1.54284	0.00857143	0.0521999	0.228	2054	tags=25%, list=14%, signal=29%	LPIN1,SLC2A5,GFI1,MAST2,PHF7,GRM8,TULP2,BUB1,CCNB2,STRBP,VDAC3,STAM2,HSPA1L,IL12RB2,PEBP1,PHKG2,POMC,NEK2,ARL4A,RFC4
HALLMARK_E2F_TARGETS	198	-0.548137	-1.54229	0.00588235	0.0551339	0.226	853	tags=10%, list=6%, signal=10%	TIPIN,NOLC1,SMC3,PPM1D,POLD3,UBR7,LYAR,ING3,NUP153,NOP56,ATAD2,GINS3,RRM2,CDC25A,PCNA,MYC,CCNE1,SLBP,TRA2B,
HALLMARK_MYC_TARGETS_V1	196	-0.601301	-1.72701	0	0.0551484	0.063	795	tags=6%, list=5%, signal=6%	RNPS1,GNL3,RSL1D1,NOLC1,DDX21,NOP56,ETF1,UBA2,NOP16,PCNA,MYC,TRA2B,SRSF7
HALLMARK_TNFA_SIGNALING_VIA_NFKB	182	-0.567286	-1.5727	0.0106383	0.0607511	0.187	641	tags=24%, list=4%, signal=25%	GCH1,IER3,SERPINB8,IL15RA,SERPINB2,FOS,TRAF1,CSF1,NFKBIE,DUSP1,RELB,RIPK2,G0S2,SIK1,SDC4,NINJ1,ZBTB10,NFKB2,FOSB,IFIT2,JUNB,CCL4,PFKFB3,ACKR3,IFNGR2,YRDC,ETS2,BTG3,MYC,NFKBIA,MAFF,NFKB1,ICAM1,CD83,PER1,SOCS3,NR4A1,NR4A3,FJX1,DUSP2,EGR3,NR4A2,KDM6B,EGR1,
HALLMARK_APICAL_JUNCTION	137	0.648885	1.50548	0.00806452	0.0726669	0.353	965	tags=16%, list=7%, signal=17%	MVD,INSIG1,CNN2,ZYX,LIMA1,MYL9,VCAN,CAP1,MPZL1,MAPK14,VCL,ARPC2,VASP,RSU1,SYK,LDLRAP1,IRS1,PTPRC,CTNND1,MSN,PTEN,MYH9
HALLMARK_UV_RESPONSE_UP	130	-0.57737	-1.59356	0.00917431	0.0759187	0.161	1469	tags=27%, list=10%, signal=30%	PDLIM3,TGFBRAP1,STARD3,FEN1,SLC6A8,PRKCD,FKBP4,PPAT,MARK2,POLR2H,SQSTM1,ATF3,MSX1,GRPEL1,DNAJB1,IL6ST,MGAT1,GCH1,DDX21,SPR,FOS,RRAD,NUP58,SLC25A4,EIF5,FOSB,CDC5L,JUNB,PPIF,BTG3,NFKBIA,DNAJA1,CCNE1,ICAM1,NR4A1
HALLMARK_DNA_REPAIR	145	-0.513859	-1.40487	0.029661	0.106846	0.457	1389	tags=14%, list=9%, signal=15%
HALLMARK_UV_RESPONSE_DN	115	0.628783	1.4408	0.0221643	0.113148	0.588	1195	tags=22%, list=8%, signal=23%
HALLMARK_KRAS_SIGNALING_UP	118	0.637986	1.44101	0.0233161	0.129026	0.588	894	tags=12%, list=6%, signal=13%
HALLMARK_BILE_ACID_METABOLISM	79	0.621341	1.36797	0.0783217	0.129931	0.864	1509	tags=28%, list=10%, signal=31%
HALLMARK_EPITHELIAL_MESENCHYMAL_TRANSITION	118	0.617292	1.41331	0.033241	0.134062	0.71	1023	tags=14%, list=7%, signal=14%
HALLMARK_ALLOGRAFT_REJECTION	156	0.586403	1.36895	0.0478036	0.138146	0.863	794	tags=14%, list=5%, signal=15%
HALLMARK_XENOBIOTIC_METABOLISM	132	0.592734	1.37617	0.0390625	0.139528	0.847	2097	tags=23%, list=14%, signal=26%
HALLMARK_APICAL_SURFACE	31	0.707382	1.39988	0.0710744	0.140941	0.765	459	tags=13%, list=3%, signal=13%
HALLMARK_GLYCOLYSIS	168	0.583594	1.38974	0.0277428	0.143066	0.807	989	tags=13%, list=7%, signal=14%
HALLMARK_TGF_BETA_SIGNALING	47	0.663577	1.38093	0.0816327	0.143812	0.833	821	tags=23%, list=6%, signal=25%
HALLMARK_PEROXISOME	90	0.591427	1.30407	0.108666	0.211718	0.969	1787	tags=27%, list=12%, signal=30%
HALLMARK_MYC_TARGETS_V2	58	-0.489259	-1.19104	0.209524	0.302277	0.872	872	tags=22%, list=6%, signal=24%
HALLMARK_INFLAMMATORY_RESPONSE	148	0.518548	1.21433	0.158098	0.337424	0.998	1058	tags=18%, list=7%, signal=19%
HALLMARK_INTERFERON_ALPHA_RESPONSE	95	0.55335	1.22758	0.145161	0.345788	0.997	1283	tags=13%, list=9%, signal=14%
HALLMARK_MITOTIC_SPINDLE	192	0.510786	1.21614	0.130326	0.352497	0.998	2339	tags=24%, list=16%, signal=28%
HALLMARK_HEDGEHOG_SIGNALING	26	0.611763	1.18705	0.262166	0.375275	1	1000	tags=19%, list=7%, signal=21%
HALLMARK_HEME_METABOLISM	157	0.487932	1.15947	0.20403	0.401838	1	2409	tags=22%, list=16%, signal=26%
HALLMARK_IL2_STAT5_SIGNALING	174	0.497404	1.16523	0.206211	0.406122	1	1066	tags=21%, list=7%, signal=22%
HALLMARK_HYPOXIA	160	0.480669	1.13471	0.240152	0.436368	1	1108	tags=14%, list=8%, signal=15%
HALLMARK_WNT_BETA_CATENIN_SIGNALING	36	-0.471696	-1.07167	0.360335	0.475759	0.969	2546	tags=25%, list=17%, signal=30%
HALLMARK_MYOGENESIS	119	0.472052	1.08753	0.329897	0.5278	1	1591	tags=17%, list=11%, signal=19%
HALLMARK_P53_PATHWAY	178	-0.357925	-0.99402	0.39823	0.592173	0.997	1324	tags=17%, list=9%, signal=18%
HALLMARK_ESTROGEN_RESPONSE_LATE	136	0.417569	0.977805	0.496783	0.607557	1	1060	tags=15%, list=7%, signal=16%
HALLMARK_ESTROGEN_RESPONSE_EARLY	149	0.435882	1.01352	0.451531	0.613336	1	1086	tags=20%, list=7%, signal=22%
HALLMARK_COAGULATION	75	0.445315	0.983188	0.49564	0.615621	1	795	tags=7%, list=5%, signal=7%
HALLMARK_ADIPOGENESIS	172	0.415531	0.99189	0.485149	0.61771	1	1135	tags=7%, list=8%, signal=7%
HALLMARK_COMPLEMENT	150	0.438772	1.02681	0.441624	0.628066	1	1600	tags=17%, list=11%, signal=19%
HALLMARK_OXIDATIVE_PHOSPHORYLATION	198	0.417841	1.01662	0.436725	0.628776	1	4176	tags=48%, list=28%, signal=66%
HALLMARK_INTERFERON_GAMMA_RESPONSE	186	0.415294	0.994859	0.475472	0.632565	1	921	tags=11%, list=6%, signal=12%
HALLMARK_NOTCH_SIGNALING	30	0.490684	0.952045	0.535714	0.641109	1	2073	tags=17%, list=14%, signal=19%
HALLMARK_ANGIOGENESIS	18	0.555801	1.02918	0.45641	0.646967	1	752	tags=17%, list=5%, signal=18%
HALLMARK_IL6_JAK_STAT3_SIGNALING	68	-0.369706	-0.912915	0.6	0.676778	0.999	750	tags=13%, list=5%, signal=14%
HALLMARK_G2M_CHECKPOINT	192	0.366813	0.890323	0.683292	0.740695	1	276	tags=2%, list=2%, signal=2%
HALLMARK_UNFOLDED_PROTEIN_RESPONSE	108	-0.3419	-0.914813	0.606426	0.745152	0.999	1646	tags=19%, list=11%, signal=22%
HALLMARK_PI3K_AKT_MTOR_SIGNALING	92	0.378213	0.839076	0.746499	0.790555	1	1195	tags=14%, list=8%, signal=15%
HALLMARK_PROTEIN_SECRETION	91	0.366882	0.819504	0.769124	0.802942	1	177	tags=2%, list=1%, signal=2%
HALLMARK_KRAS_SIGNALING_DN	86	0.380193	0.839391	0.727763	0.812634	1	1202	tags=14%, list=8%, signal=15%
HALLMARK_APOPTOSIS	139	0.337129	0.791628	0.827225	0.823253	1	1912	tags=19%, list=13%, signal=22%
HALLMARK_REACTIVE_OXYGEN_SPECIES_PATHWAY	48	-0.327211	-0.756598	0.843195	0.920785	1	765	tags=10%, list=5%, signal=11%

## Sheet: SiblingT21 CAvsCtrl
NAME	SIZE	ES	NES	NOM p-val	FDR q-val	FWER p-val	RANK AT MAX	LEADING EDGE	Leading edge genes
HALLMARK_CHOLESTEROL_HOMEOSTASIS	63	0.921139	2.10463	0	0	0	525	tags=46%, list=4%, signal=48%	TMEM97,MVD,SQLE,MVK,LDLR,NSDHL,HMGCS1,HMGCR,CYP51A1,ACAT2,DHCR7,SCD,LSS,HSD17B7,EBP,TM7SF2,FDFT1,ETHE1,PCYT2,GLDC,IDI1,ACSS2,FASN,FDPS,TP53INP1,FADS2,SC5D,NIBAN1,ALCAM,
HALLMARK_UV_RESPONSE_UP	127	-0.70275	-1.99995	0	0	0	1832	tags=32%, list=13%, signal=37%	SLC25A4,PDLIM3,MGAT1,IL6ST,POLR2H,IRF1,FOSB,DLG4,GCH1,FEN1,CEBPG,ASNS,LYN,CHKA,CYB5R1,AGO2,NAT1,ATF3,CDC34,STARD3,SLC6A8,CYP1A1,GRPEL1,RRAD,SPR,ENO2,MARK2,CDC5L,EIF5,PPIF,HMOX1,DNAJB1,SQSTM1,JUNB,ICAM1,DNAJA1,BTG3,NFKBIA,CCNE1,NR4A1,MSX1,
HALLMARK_TNFA_SIGNALING_VIA_NFKB	176	-0.622683	-1.82213	0	0.00761658	0.015	954	tags=28%, list=7%, signal=30%	JAG1,SERPINB8,NAMPT,ATF3,NFKBIE,ZBTB10,TRIP10,TRAF1,BCL2A1,SAT1,B4GALT1,IL15RA,G0S2,BIRC3,CCL4,SPHK1,IER2,NFKB2,PLK2,PPP1R15A,EIF1,DUSP1,GADD45B,NINJ1,RELB,MAFF,ACKR3,BCL6,IFNGR2,YRDC,NFKB1,SQSTM1,SOCS3,JUN,SERPINB2,NR4A3,KDM6B,JUNB,ETS2,ICAM1,NR4A2,BTG3,MYC,NFKBIA,EGR3,FJX1,NR4A1,PFKFB3,DUSP2,EGR1,
HALLMARK_MTORC1_SIGNALING	193	0.702819	1.8326	0	0.0088793	0.018	526	tags=15%, list=4%, signal=15%	TMEM97,SQLE,LDLR,HMGCS1,HMGCR,CYP51A1,DHCR7,SCD,ELOVL6,EBP,TM7SF2,RDH11,IDI1,DHCR24,IDH1,ACSL3,FADS1,FGL2,BUB1,INSIG1,BHLHE40,ACLY,ACACA,ELOVL5,FADS2,PNP,SC5D,NIBAN1,CYB5B,
HALLMARK_XENOBIOTIC_METABOLISM	125	0.677534	1.70691	0.00142653	0.0238122	0.116	1071	tags=16%, list=8%, signal=17%	TMEM97,NPC1,IDH1,CYFIP2,GCNT2,RETSAT,HES6,PDLIM5,CASP6,CROT,ELOVL5,PYCR1,LPIN2,PGD,ID2,ABCD2,SLC12A4,POR,CAT,JUP,
HALLMARK_FATTY_ACID_METABOLISM	125	0.686927	1.72007	0.00291545	0.0249459	0.099	440	tags=11%, list=3%, signal=11%	NSDHL,HMGCS1,ACAT2,HSD17B7,ACSL1,RDH11,IDI1,DHCR24,IDH1,FASN,RETSAT,MGLL,ELOVL5,MDH1,
HALLMARK_ANDROGEN_RESPONSE	85	0.718772	1.73256	0.00149477	0.0277665	0.083	759	tags=21%, list=6%, signal=22%	HMGCS1,HMGCR,SRF,SCD,PMEPA1,IDI1,DHCR24,ACSL3,IQGAP2,PDLIM5,FADS1,INSIG1,MYL12A,ELOVL5,ARID5B,UAP1,ABHD2,UBE2J1,
HALLMARK_MYC_TARGETS_V1	196	-0.559092	-1.66292	0	0.0295026	0.082	453	tags=4%, list=3%, signal=4%	NOLC1,RNPS1,PSMD7,SRSF3,RSL1D1,UBA2,NOP56,NOP16,MYC,PCNA,TRA2B,SRSF7,
HALLMARK_BILE_ACID_METABOLISM	76	0.692244	1.62478	0.00592593	0.0476973	0.253	1028	tags=21%, list=7%, signal=23%	ATXN1,ACSL1,NPC1,IDI1,DHCR24,IDH1,RETSAT,FADS1,CROT,FADS2,AMACR,BCAR3,SLC27A5,ABCD2,GSTK1,CAT,
HALLMARK_PEROXISOME	90	0.655384	1.56537	0.0132939	0.0590455	0.382	1028	tags=22%, list=7%, signal=24%	ATXN1,ACSL1,RDH11,IDI1,DHCR24,IDH1,RETSAT,ABCB9,FADS1,FDPS,STS,ELOVL5,TOP2A,DHRS3,SMARCC1,ESR2,ABCD2,GSTK1,ACSL4,CAT,
HALLMARK_MITOTIC_SPINDLE	191	0.605248	1.57031	0.0107672	0.0654316	0.371	2155	tags=36%, list=16%, signal=42%	KIF1B,CENPJ,VCL,SUN2,TRIO,PDLIM5,DST,MID1IP1,BUB1,SSH2,FLNA,NIN,TOP2A,ANLN,CENPF,CKAP5,DYNC1H1,CCDC88A,KIF3C,TPX2,BIRC5,KIF3B,ARHGEF3,CDK5RAP2,AURKA,ESPL1,MYH9,APC,PREX1,LMNB1,CCNB2,RACGAP1,PIF1,MYO1E,RAPGEF5,ALMS1,KIF4A,KIF15,DLGAP5,DOCK2,PLK1,PRC1,TSC1,TIAM1,HDAC6,KNTC1,ABL1,INCENP,SOS1,CENPE,ARHGEF12,FLNB,NUSAP1,CLIP1,ARHGAP4,HOOK3,RALBP1,SORBS2,NOTCH2,KIF22,CEP192,PCGF5,NDC80,PCM1,FGD6,WASF2,…
HALLMARK_APICAL_JUNCTION	131	0.607162	1.53379	0.00985915	0.0668956	0.453	782	tags=15%, list=6%, signal=15%	MVD,MPZL1,CNN2,ZYX,VCL,MYL9,CAP1,LIMA1,SYK,MAPK14,INSIG1,RSU1,VCAN,ARPC2,ARHGEF6,PIK3R3,MYH9,VASP,IRS1,
HALLMARK_P53_PATHWAY	173	-0.516086	-1.50365	0	0.0760372	0.301	1780	tags=26%, list=13%, signal=30%	PERP,SEC61A1,TRIAP1,TNFSF9,CASP1,FDXR,FAM162A,BAX,DDB2,UPP1,EI24,NOTCH1,IFI30,TOB1,MDM2,JAG2,CDK5R1,COQ8A,PLK3,STOM,TSPYL2,SLC3A2,ATF3,CDKN2AIP,PMM1,SAT1,NDRG1,RRAD,MKNK2,SPHK1,AK1,DDIT3,PLK2,PPM1D,PPP1R15A,TRAF4,HMOX1,TGFB1,NINJ1,PDGFA,JUN,ABAT,TXNIP,PCNA,HEXIM1,
HALLMARK_WNT_BETA_CATENIN_SIGNALING	33	-0.656024	-1.4788	0.0696379	0.0768536	0.356	1466	tags=33%, list=11%, signal=37%	TCF7,NOTCH1,CTNNB1,JAG2,FRAT1,AXIN1,JAG1,HEY1,HDAC5,DLL1,MYC,
HALLMARK_MYC_TARGETS_V2	58	0.648527	1.48704	0.0346457	0.076935	0.571	0	tags=2%, list=0%, signal=2%	TMEM97
HALLMARK_SPERMATOGENESIS	72	0.650191	1.49572	0.0322581	0.0796002	0.548	1368	tags=15%, list=10%, signal=17%	LPIN1,BUB1,MAST2,GFI1,STRBP,AURKA,CCNB2,SLC2A5,VDAC3,PEBP1,MTOR,
HALLMARK_DNA_REPAIR	144	-0.526684	-1.51823	0.0166667	0.0846687	0.277	1659	tags=16%, list=12%, signal=18%	POLR2H,DDB2,TK2,POLD3,FEN1,COX17,POLB,POLR1C,SDCBP,POLR3C,GTF2B,BOLA2,ELOA,GTF2F1,EIF1B,AK1,POLR2D,UMPS,CANT1,ELL,TSG101,SRSF6,PCNA,
HALLMARK_UV_RESPONSE_DN	107	0.590835	1.45009	0.0352423	0.0955724	0.697	1678	tags=28%, list=12%, signal=32%	LDLR,ATXN1,MAP1B,GCNT1,PDLIM5,MAPK14,ATP2B4,INSIG1,WDR37,PRKCE,BHLHE40,MGLL,RUNX1,SRI,MIOS,PIK3R3,IRS1,PRDM2,CELF2,MAP2K5,TGFBR3,ATRN,BCKDHB,CITED2,TGFBR2,CDKN1B,MGMT,ADD3,ARHGEF9,ATP2C1,
HALLMARK_REACTIVE_OXYGEN_SPECIES_PATHWAY	47	-0.580563	-1.40749	0.076087	0.106641	0.512	321	tags=11%, list=2%, signal=11%
HALLMARK_KRAS_SIGNALING_UP	112	0.578601	1.42433	0.0464072	0.108777	0.78	1816	tags=22%, list=13%, signal=26%
HALLMARK_COMPLEMENT	143	-0.474903	-1.32892	0.0541516	0.135816	0.69	1323	tags=15%, list=10%, signal=16%
HALLMARK_APOPTOSIS	131	-0.467054	-1.33196	0.043771	0.149662	0.685	1679	tags=25%, list=12%, signal=28%
HALLMARK_HYPOXIA	157	-0.421563	-1.22937	0.0958904	0.182001	0.891	1098	tags=14%, list=8%, signal=15%
HALLMARK_UNFOLDED_PROTEIN_RESPONSE	108	-0.437755	-1.21182	0.141914	0.184181	0.91	1195	tags=14%, list=9%, signal=15%
HALLMARK_ANGIOGENESIS	18	-0.578484	-1.22952	0.223744	0.198449	0.89	285	tags=17%, list=2%, signal=17%
HALLMARK_E2F_TARGETS	198	-0.416237	-1.24227	0.0740741	0.202193	0.874	332	tags=6%, list=2%, signal=6%
HALLMARK_IL6_JAK_STAT3_SIGNALING	67	-0.457649	-1.16421	0.22905	0.222188	0.953	1728	tags=31%, list=13%, signal=36%
HALLMARK_MYOGENESIS	102	0.518531	1.26498	0.144118	0.282611	0.987	762	tags=12%, list=6%, signal=12%
HALLMARK_TGF_BETA_SIGNALING	46	0.571621	1.26722	0.168285	0.299156	0.987	845	tags=17%, list=6%, signal=18%
HALLMARK_EPITHELIAL_MESENCHYMAL_TRANSITION	104	0.500915	1.21896	0.157083	0.321735	0.993	845	tags=13%, list=6%, signal=14%
HALLMARK_G2M_CHECKPOINT	192	0.471261	1.22036	0.131752	0.339338	0.992	2245	tags=31%, list=16%, signal=37%
HALLMARK_KRAS_SIGNALING_DN	80	0.502161	1.18233	0.206061	0.374602	0.998	1293	tags=15%, list=9%, signal=16%
HALLMARK_GLYCOLYSIS	165	0.450543	1.13716	0.240453	0.423249	1	745	tags=9%, list=5%, signal=9%
HALLMARK_ALLOGRAFT_REJECTION	152	0.440887	1.11983	0.269663	0.439885	1	989	tags=11%, list=7%, signal=11%
HALLMARK_ESTROGEN_RESPONSE_EARLY	143	0.448344	1.13957	0.250354	0.440263	1	731	tags=10%, list=5%, signal=11%
HALLMARK_PI3K_AKT_MTOR_SIGNALING	91	-0.372835	-1.00093	0.400662	0.458986	0.999	1373	tags=18%, list=10%, signal=19%
HALLMARK_ADIPOGENESIS	168	0.411568	1.06129	0.339385	0.537715	1	422	tags=5%, list=3%, signal=5%
HALLMARK_IL2_STAT5_SIGNALING	168	0.402473	1.02891	0.416107	0.586124	1	1267	tags=17%, list=9%, signal=18%
HALLMARK_COAGULATION	64	0.435216	1.01526	0.427068	0.591328	1	614	tags=6%, list=4%, signal=7%
HALLMARK_ESTROGEN_RESPONSE_LATE	132	0.391005	0.982013	0.470014	0.639697	1	879	tags=10%, list=6%, signal=10%
HALLMARK_INFLAMMATORY_RESPONSE	140	0.382528	0.969894	0.51216	0.640722	1	522	tags=8%, list=4%, signal=8%
HALLMARK_HEME_METABOLISM	153	0.370519	0.932948	0.573388	0.692376	1	1758	tags=17%, list=13%, signal=19%
HALLMARK_HEDGEHOG_SIGNALING	25	0.443537	0.915068	0.568297	0.704257	1	751	tags=16%, list=5%, signal=17%
HALLMARK_INTERFERON_GAMMA_RESPONSE	183	0.336902	0.86791	0.719346	0.780501	1	1427	tags=13%, list=10%, signal=14%
HALLMARK_PROTEIN_SECRETION	90	0.335728	0.799702	0.782209	0.860495	1	1810	tags=11%, list=13%, signal=13%
HALLMARK_OXIDATIVE_PHOSPHORYLATION	198	0.3089	0.806767	0.853591	0.875427	1	3798	tags=36%, list=28%, signal=49%
HALLMARK_NOTCH_SIGNALING	28	-0.335679	-0.760844	0.847575	0.910143	1	3310	tags=36%, list=24%, signal=47%
HALLMARK_APICAL_SURFACE	31	0.319029	0.675732	0.896607	0.960145	1	3099	tags=32%, list=23%, signal=42%
HALLMARK_INTERFERON_ALPHA_RESPONSE	94	0.288427	0.707167	0.926686	0.964636	1	2386	tags=20%, list=17%, signal=24%

## Sheet: D21 CAIFNvsIFN
NAME	SIZE	ES	NES	NOM p-val	FDR q-val	FWER p-val	RANK AT MAX	LEADING EDGE	Leading edge genes
HALLMARK_CHOLESTEROL_HOMEOSTASIS	67	0.869989	2.13159	0	0	0	365	tags=34%, list=2%, signal=35%	TMEM97,SQLE,MVD,CYP51A1,LDLR,HMGCS1,NSDHL,MVK,LSS,HSD17B7,TP53INP1,ACAT2,ETHE1,HMGCR,IDI1,SCD,EBP,ALCAM,FDFT1,GLDC,TM7SF2,ANTXR2,DHCR7,
HALLMARK_ANDROGEN_RESPONSE	86	0.790389	2.02392	0	0	0	820	tags=23%, list=5%, signal=24%	PMEPA1,SRF,INSIG1,HMGCS1,MYL12A,HMGCR,IQGAP2,IDI1,SCD,ELL2,ARID5B,SGK1,RAB4A,ELOVL5,TNFAIP8,CDK6,TPD52,ACSL3,SLC26A2,PDLIM5,
HALLMARK_MTORC1_SIGNALING	194	0.689267	1.9488	0	0	0	926	tags=18%, list=6%, signal=18%	TMEM97,SQLE,CYP51A1,LDLR,INSIG1,HMGCS1,CXCR4,FGL2,TES,HMGCR,SLC1A4,IDI1,SCD,EBP,IDH1,TM7SF2,ADD3,ELOVL6,DHCR7,SEC11A,BHLHE40,SLA,ELOVL5,DDIT4,TFRC,SC5D,RDH11,GSK3B,NIBAN1,ACSL3,ACTR3,PSAT1,BUB1,CYB5B,
HALLMARK_FATTY_ACID_METABOLISM	127	0.637069	1.7218	0	0.00893433	0.031	1618	tags=19%, list=11%, signal=21%	HMGCS1,NSDHL,HSD17B7,ACSL1,ACAT2,MGLL,RETSAT,IDI1,IDH1,UGDH,ERP29,ELOVL5,CPOX,MDH1,ACSL4,RDH11,CBR3,HSDL2,GSTZ1,DECR1,DLD,PRDX6,BLVRA,SUCLG2,
HALLMARK_UV_RESPONSE_DN	118	0.635061	1.70787	0	0.0093954	0.041	1037	tags=23%, list=7%, signal=24%	LDLR,INSIG1,GCNT1,MIOS,SRI,ATXN1,MAP1B,MGLL,SMAD3,MAPK14,BMPR1A,ADD3,NR3C1,PTEN,PRKCE,BHLHE40,ATP2C1,SMAD7,PDLIM5,RUNX1,RASA2,CDKN1B,PRDM2,CITED2,ANXA2,CDON,PLCB4
HALLMARK_PANCREAS_BETA_CELLS	15	0.832354	1.68878	0.0189036	0.0120582	0.063	773	tags=20%, list=5%, signal=21%	LMO2,SEC11A,FOXO1,
HALLMARK_KRAS_SIGNALING_UP	126	0.624542	1.66686	0.00311526	0.0137937	0.079	1282	tags=17%, list=8%, signal=19%	TRIB2,IKZF1,CXCR4,TRIB1,KCNN4,ETS1,LAPTM5,RGS16,ID2,PRDM1,GALNT3,PTCD2,HDAC9,GADD45G,CROT,PLAUR,IL7R,MTMR10,SPRY2,DCBLD2,CBR4,ZNF277,
HALLMARK_EPITHELIAL_MESENCHYMAL_TRANSITION	123	0.59087	1.60336	0.00311526	0.0282356	0.188	1386	tags=15%, list=9%, signal=16%	PMEPA1,GLIPR1,TPM4,NT5E,VCAN,MYL9,CD59,ID2,PDLIM4,PLOD1,RHOB,GADD45A,FGF2,PLAUR,PTHLH,WNT5A,ITGB1,CXCL12,
HALLMARK_XENOBIOTIC_METABOLISM	136	0.5727	1.5673	0.00769231	0.0385806	0.27	966	tags=10%, list=6%, signal=11%	TMEM97,CASP6,ABCD2,RETSAT,IDH1,UGDH,ID2,IGF1,GCNT2,ELOVL5,ALDH2,PDLIM5,CROT,MAN1A1,
HALLMARK_GLYCOLYSIS	169	0.549381	1.54908	0.00444444	0.0410975	0.308	1060	tags=11%, list=7%, signal=12%	FUT8,CXCR4,NSDHL,NT5E,CASP6,BIK,VCAN,IDH1,GNE,CHST2,HS2ST1,DDIT4,MDH1,PLOD1,CHST12,TPBG,CITED2,HMMR,AKR1A1,
HALLMARK_IL6_JAK_STAT3_SIGNALING	71	-0.581185	-1.6157	0.0134771	0.0493619	0.17	809	tags=17%, list=5%, signal=18%	CXCL10,STAT3,ITGB3,STAT1,CSF1,MYD88,IFNGR2,SOCS3,IL15RA,TGFB1,IRF1,CXCL9,
HALLMARK_UV_RESPONSE_UP	131	-0.569755	-1.70931	0	0.0539822	0.066	1430	tags=24%, list=9%, signal=27%	CNP,SQSTM1,GRINA,EIF5,WIZ,RXRB,FOSB,PRKCD,ATF3,PRKACA,FOS,FKBP4,PRPF3,SLC25A4,TGFBRAP1,CDK2,STARD3,MGAT1,DNAJB1,PPIF,CDC5L,CCNE1,NUP58,NFKBIA,JUNB,MARK2,BTG3,DNAJA1,NR4A1,ICAM1,TAP1,IRF1,
HALLMARK_TNFA_SIGNALING_VIA_NFKB	184	-0.526082	-1.63833	0.003367	0.0629455	0.147	877	tags=22%, list=6%, signal=23%	TRAF1,TRIP10,CXCL10,BCL6,RELA,NFKBIE,NINJ1,PFKFB3,CSF1,CCL5,ETS2,RELB,RIPK2,NFKB2,IFIT2,YRDC,CD83,IFNGR2,MYC,SOCS3,NFKBIA,ACKR3,JUNB,CCL4,IL15RA,BTG3,FJX1,PER1,NR4A3,NFKB1,NR4A1,ICAM1,DUSP2,TAP1,MAFF,EGR3,NR4A2,KDM6B,IRF1,EGR1,
HALLMARK_HYPOXIA	162	0.523389	1.47664	0.00449775	0.0649753	0.544	1034	tags=18%, list=7%, signal=19%	KLF7,CXCR4,SLC2A5,TES,CASP6,KLF6,BTG1,ETS1,BCL2,CHST2,NR3C1,STBD1,BHLHE40,GCNT2,FOXO3,DDIT4,PLAC8,TPBG,PRDX5,TPD52,CCNG2,KLHL24,CDKN1B,CITED2,AMPD3,ANXA2,RORA,NAGK,PLAUR,
HALLMARK_PEROXISOME	90	0.573148	1.48107	0.0233281	0.0673717	0.525	1001	tags=19%, list=7%, signal=20%	ACSL1,ATXN1,ABCD2,ABCB9,RETSAT,STS,IDI1,IDH1,SLC27A2,UGT2B17,ELOVL5,ACSL4,RDH11,FDPS,PRDX5,TOP2A,DHRS3,
HALLMARK_APICAL_JUNCTION	141	0.542244	1.48744	0.0149477	0.0687299	0.499	1048	tags=13%, list=7%, signal=14%	MVD,INSIG1,CNN2,LIMA1,ZYX,VCAN,MYL9,MPZL1,MAPK14,CAP1,VCL,PTEN,ARPC2,MYL12B,SYK,VASP,ADAM9,LDLRAP1,RSU1,
HALLMARK_HEME_METABOLISM	161	0.528518	1.46277	0.0102041	0.0692611	0.591	1605	tags=14%, list=11%, signal=15%	LMO2,KDM7A,KLF3,ELL2,NR3C1,FOXO3,CPOX,TFRC,TENT5C,DAAM1,FBXO34,AGPAT4,ADD1,SLC6A9,CDR2,GLRX5,TSPAN5,ARL2BP,RNF19A,BLVRA,ACP5,AQP3,
HALLMARK_IL2_STAT5_SIGNALING	175	0.509779	1.43669	0.0143678	0.0797309	0.657	1465	tags=23%, list=10%, signal=26%	IL10,MAPKAPK2,FGL2,NT5E,KLF6,TLR7,CCR4,MYO1E,AHNAK,BCL2,ALCAM,ADAM19,LRIG1,NCOA3,RGS16,POU2F1,LRRC8C,RHOH,IRF4,BHLHE40,CASP3,PLEC,RHOB,MAP3K8,SWAP70,FURIN,ITGAE,GLIPR2,CDC42SE2,DHRS3,RORA,SPRED2,SELL,IKZF2,ANXA4,SLC39A8,TNFRSF8,RRAGD,TNFRSF21,BATF,EOMES,
HALLMARK_INTERFERON_GAMMA_RESPONSE	186	-0.465507	-1.48445	0.010453	0.0875267	0.36	1470	tags=25%, list=10%, signal=28%	CD274,IRF8,BATF2,TNFAIP2,RBCK1,CD40,IFIT3,RSAD2,DHX58,SP110,IFIT1,MT2A,UBE2L6,GBP4,MX1,PLSCR1,TRIM25,SLC25A28,EPSTI1,CMPK2,TRAFD1,TOR1B,CXCL10,STAT3,RTP4,TRIM21,IRF7,STAT1,USP18,PFKP,MYD88,CCL5,MX2,OASL,ZNFX1,RIPK2,IFIT2,SOCS3,NFKBIA,OGFR,IL15RA,ISOC1,NFKB1,ICAM1,TAP1,IRF1,CXCL9,
HALLMARK_INTERFERON_ALPHA_RESPONSE	95	-0.499005	-1.43438	0.0243243	0.100973	0.462	2139	tags=40%, list=14%, signal=46%
HALLMARK_SPERMATOGENESIS	81	0.53428	1.3883	0.0663507	0.101245	0.776	2329	tags=21%, list=15%, signal=25%
HALLMARK_TGF_BETA_SIGNALING	48	0.594416	1.39393	0.072758	0.103919	0.76	1255	tags=27%, list=8%, signal=29%
HALLMARK_HEDGEHOG_SIGNALING	27	0.635298	1.36937	0.110544	0.11188	0.827	1088	tags=22%, list=7%, signal=24%
HALLMARK_COAGULATION	79	0.527819	1.35561	0.0848	0.118749	0.869	944	tags=9%, list=6%, signal=9%
HALLMARK_WNT_BETA_CATENIN_SIGNALING	37	-0.55647	-1.37529	0.0869565	0.122096	0.612	1972	tags=30%, list=13%, signal=34%
HALLMARK_REACTIVE_OXYGEN_SPECIES_PATHWAY	48	-0.487496	-1.28015	0.143552	0.185037	0.806	1170	tags=15%, list=8%, signal=16%
HALLMARK_E2F_TARGETS	198	-0.379556	-1.2069	0.104938	0.247608	0.919	2006	tags=17%, list=13%, signal=19%
HALLMARK_BILE_ACID_METABOLISM	82	0.483021	1.24041	0.155229	0.247694	0.994	1446	tags=18%, list=10%, signal=20%
HALLMARK_DNA_REPAIR	145	-0.394	-1.18407	0.140984	0.25172	0.941	1290	tags=12%, list=8%, signal=13%
HALLMARK_INFLAMMATORY_RESPONSE	154	-0.372016	-1.16194	0.153605	0.260966	0.963	1382	tags=20%, list=9%, signal=22%
HALLMARK_APICAL_SURFACE	33	0.536914	1.21037	0.240506	0.28212	0.997	1139	tags=15%, list=7%, signal=16%
HALLMARK_ESTROGEN_RESPONSE_EARLY	153	0.419156	1.17568	0.167435	0.301929	0.999	1619	tags=24%, list=11%, signal=26%
HALLMARK_OXIDATIVE_PHOSPHORYLATION	198	0.420886	1.18964	0.154795	0.303579	0.999	3913	tags=33%, list=26%, signal=44%
HALLMARK_MYOGENESIS	130	0.434564	1.18055	0.182362	0.30603	0.999	1710	tags=18%, list=11%, signal=20%
HALLMARK_ALLOGRAFT_REJECTION	159	0.413987	1.16344	0.191617	0.30884	0.999	729	tags=13%, list=5%, signal=13%
HALLMARK_MYC_TARGETS_V1	196	-0.342938	-1.08553	0.241042	0.334906	0.999	885	tags=6%, list=6%, signal=6%
HALLMARK_COMPLEMENT	153	-0.353309	-1.09123	0.248466	0.354436	0.997	1326	tags=10%, list=9%, signal=11%
HALLMARK_ESTROGEN_RESPONSE_LATE	141	0.404085	1.11642	0.271642	0.375934	1	867	tags=13%, list=6%, signal=13%
HALLMARK_ANGIOGENESIS	18	0.546101	1.10874	0.358595	0.376296	1	432	tags=11%, list=3%, signal=11%
HALLMARK_PI3K_AKT_MTOR_SIGNALING	93	0.418469	1.09163	0.304482	0.39422	1	1076	tags=14%, list=7%, signal=15%
HALLMARK_MITOTIC_SPINDLE	192	0.373517	1.0721	0.329609	0.415374	1	1736	tags=17%, list=11%, signal=19%
HALLMARK_G2M_CHECKPOINT	192	0.365446	1.04244	0.370423	0.458094	1	1280	tags=7%, list=8%, signal=8%
HALLMARK_KRAS_SIGNALING_DN	92	0.388077	1.00794	0.44898	0.511927	1	1676	tags=21%, list=11%, signal=23%
HALLMARK_APOPTOSIS	140	-0.330091	-0.9781	0.455621	0.512324	1	835	tags=9%, list=5%, signal=10%
HALLMARK_ADIPOGENESIS	174	0.349791	0.98719	0.483013	0.52041	1	1601	tags=11%, list=11%, signal=13%
HALLMARK_PROTEIN_SECRETION	91	0.373617	0.975522	0.475	0.527215	1	3928	tags=35%, list=26%, signal=47%
HALLMARK_MYC_TARGETS_V2	58	0.408891	0.98753	0.472952	0.536324	1	1	tags=2%, list=0%, signal=2%
HALLMARK_P53_PATHWAY	180	0.326949	0.922937	0.600852	0.614952	1	1375	tags=14%, list=9%, signal=16%
HALLMARK_UNFOLDED_PROTEIN_RESPONSE	108	-0.289826	-0.854173	0.752778	0.766341	1	2840	tags=29%, list=19%, signal=35%
HALLMARK_NOTCH_SIGNALING	32	0.34905	0.780948	0.752197	0.860602	1	1810	tags=13%, list=12%, signal=14%

## Sheet: SiblingT21CAIFNvsIFN
NAME	SIZE	ES	NES	NOM p-val	FDR q-val	FWER p-val	RANK AT MAX	LEADING EDGE	Leading edge genes
HALLMARK_CHOLESTEROL_HOMEOSTASIS	63	0.937374	1.88944	0	0	0	235	tags=38%, list=2%, signal=39%	TMEM97,MVD,NSDHL,SQLE,LSS,MVK,DHCR7,LDLR,CYP51A1,HMGCS1,ACAT2,ETHE1,TM7SF2,HMGCR,SCD,EBP,PCYT2,HSD17B7,TRIB3,FDFT1,ACSS2,GLDC,TP53INP1,FDPS,
HALLMARK_E2F_TARGETS	198	-0.690241	-1.85876	0	0.00802143	0.005	595	tags=10%, list=4%, signal=10%	CCP110,RAD1,MYC,MKI67,SMC3,RAD21,MELK,MCM4,NOP56,NASP,GINS1,NOLC1,PPP1R8,E2F8,LYAR,BRCA1,NUP153,PSIP1,ING3,CDC25A,ATAD2,CCNE1,TIPIN,POLD3,GINS3,RRM2,SLBP,TRA2B,UBR7,PCNA,
HALLMARK_INTERFERON_GAMMA_RESPONSE	183	-0.678901	-1.77203	0	0.00883133	0.023	1294	tags=34%, list=9%, signal=37%	APOL6,OAS2,CD40,XAF1,PARP14,PTGS2,IFIT3,TOR1B,TRAFD1,IFIH1,SOD2,IFIT1,CASP1,DHX58,RNF213,PELI1,SOCS3,CMKLR1,PTPN6,TNFAIP6,SP110,SAMD9L,PTPN2,PNPT1,CD274,RTP4,MX1,IRF7,NAMPT,SPPL2A,PLSCR1,HLA-G,IFI44,OGFR,BPGM,RSAD2,MYD88,TRIM21,USP18,TRIM25,EPSTI1,OASL,ISOC1,MX2,TDRD7,DDX58,GBP4,IL15RA,STAT1,ZNFX1,TNFSF10,IFIT2,CMPK2,CXCL10,NFKB1,NFKBIA,ICAM1,XCL1,TXNIP,TAP1,IRF1,CXCL9,
HALLMARK_UV_RESPONSE_UP	127	-0.697162	-1.79156	0	0.00900621	0.017	1253	tags=20%, list=9%, signal=21%	PDLIM3,FEN1,PPIF,DNAJB1,IL6ST,CNP,STARD3,HSPA13,SOD2,DDX21,JUNB,FOS,BTG3,EIF5,MARK2,NR4A1,CDC5L,CCNE1,NFKBIA,NUP58,ICAM1,DNAJA1,MSX1,TAP1,IRF1,
HALLMARK_INTERFERON_ALPHA_RESPONSE	94	-0.74742	-1.80951	0	0.00986078	0.013	1213	tags=35%, list=9%, signal=38%	PARP14,IFIT3,TRAFD1,CNP,IFIH1,CASP1,DHX58,PARP9,SP110,SAMD9L,PNPT1,RTP4,MX1,IRF7,PLSCR1,IFI44,OGFR,RSAD2,TRIM21,USP18,ELF1,TRIM25,EPSTI1,OASL,TDRD7,GBP4,OAS1,IFIT2,CMPK2,CXCL10,TXNIP,TAP1,IRF1,
HALLMARK_FATTY_ACID_METABOLISM	125	0.793252	1.7095	0	0.02034	0.048	887	tags=15%, list=6%, signal=16%	NSDHL,HMGCS1,ACAT2,RETSAT,ACSL1,HSD17B7,DHCR24,MGLL,FASN,GLUL,MCEE,ACSS1,ACADS,RDH11,MDH1,IDI1,ECH1,IDH1,ERP29,
HALLMARK_ANDROGEN_RESPONSE	85	0.816258	1.68751	0.00535475	0.0216564	0.074	1226	tags=26%, list=9%, signal=28%	SRF,PMEPA1,HMGCS1,HMGCR,SCD,INSIG1,UAP1,DHCR24,MYL12A,SGK1,FADS1,CDC14B,AKAP12,ACSL3,RAB4A,IDI1,PDLIM5,ARID5B,UBE2J1,HSD17B14,CAMKK2,ELOVL5,
HALLMARK_MTORC1_SIGNALING	193	0.741168	1.65034	0	0.0222324	0.124	849	tags=17%, list=6%, signal=18%	TMEM97,SQLE,DHCR7,LDLR,CYP51A1,HMGCS1,TM7SF2,HMGCR,SCD,EBP,SLC1A4,ELOVL6,TRIB3,INSIG1,DHCR24,BHLHE40,PNP,YKT6,SLC7A5,GOT1,FADS1,CXCR4,CTH,SC5D,ACSL3,ACLY,SRD5A1,PFKL,RDH11,IDI1,IDH1,FADS2,SLC9A3R1,
HALLMARK_XENOBIOTIC_METABOLISM	125	0.783142	1.6665	0	0.0226248	0.101	437	tags=9%, list=3%, signal=9%	TMEM97,RETSAT,PYCR1,NPC1,CYFIP2,CASP6,SLC12A4,HES6,BCAR1,ABCD2,ID2,
HALLMARK_COMPLEMENT	143	-0.652933	-1.66403	0	0.0226989	0.074	84	tags=3%, list=1%, signal=3%	CASP9,RABIF,RNF4,KIF2A,JAK2,APOBEC3F,PPP2CB,VCPIP1,STX4,CTSS,CASP1,GPD2,CBLB,GNGT2,IRF7,PLSCR1,CTSC,MAFF,IRF1,CR2,HSPA5,
HALLMARK_IL6_JAK_STAT3_SIGNALING	67	-0.706043	-1.61957	0.0100671	0.0290146	0.11	953	tags=22%, list=7%, signal=24%	JUN,IFNGR2,SOCS3,PTPN2,IL18R1,TGFB1,MYD88,PTPN11,ITGB3,CBL,IL15RA,STAT1,CXCL10,IRF1,CXCL9,
HALLMARK_MYC_TARGETS_V2	58	0.81469	1.6163	0.00577201	0.0292945	0.188	0	tags=2%, list=0%, signal=2%	TMEM97
HALLMARK_MYC_TARGETS_V1	196	-0.597285	-1.58089	0.00621118	0.0351789	0.153	1848	tags=14%, list=13%, signal=16%	ETF1,SERBP1,SET,NOP16,CTPS1,EIF4G2,SRSF1,RNPS1,SNRPD1,SRSF2,SRSF3,RSL1D1,CDK2,MYC,EIF4E,PSMA4,HNRNPR,SNRPB2,MCM4,DDX21,NOP56,PSMC6,NOLC1,DHX15,UBA2,TRA2B,PCNA,SRSF7,
HALLMARK_MYOGENESIS	102	0.751073	1.58291	0.00809717	0.0369683	0.256	1172	tags=16%, list=9%, signal=17%	LPIN1,SMTN,SCD,ACSL1,BHLHE40,FDPS,PDLIM7,GABARAPL2,ABLIM1,LSP1,MEF2C,CNN3,ATP6AP1,IGF1,FGF2,MYH9,
HALLMARK_APICAL_JUNCTION	131	0.693172	1.49487	0.0221066	0.0840218	0.556	625	tags=10%, list=5%, signal=10%	MVD,CNN2,ZYX,MYL9,INSIG1,CAP1,VCL,MPZL1,LIMA1,VASP,RSU1,SYK,ARPC2,
HALLMARK_EPITHELIAL_MESENCHYMAL_TRANSITION	104	0.685848	1.44867	0.0307076	0.10368	0.706	1219	tags=16%, list=9%, signal=18%
HALLMARK_BILE_ACID_METABOLISM	76	0.692683	1.42264	0.0536451	0.106844	0.78	846	tags=17%, list=6%, signal=18%
HALLMARK_COAGULATION	64	0.703785	1.42806	0.050578	0.110973	0.767	680	tags=8%, list=5%, signal=8%
HALLMARK_PEROXISOME	90	0.706305	1.44901	0.0389262	0.114942	0.705	881	tags=19%, list=6%, signal=20%
HALLMARK_INFLAMMATORY_RESPONSE	140	-0.544839	-1.40564	0.0384615	0.115127	0.463	704	tags=14%, list=5%, signal=14%
HALLMARK_SPERMATOGENESIS	72	0.684353	1.39171	0.0530726	0.127467	0.862	978	tags=11%, list=7%, signal=12%
HALLMARK_TNFA_SIGNALING_VIA_NFKB	176	-0.520062	-1.34985	0.0698925	0.145947	0.596	953	tags=24%, list=7%, signal=26%
HALLMARK_KRAS_SIGNALING_DN	80	0.611462	1.24444	0.166209	0.259023	1	1557	tags=20%, list=11%, signal=22%
HALLMARK_ADIPOGENESIS	168	0.580722	1.25923	0.105006	0.262484	0.997	991	tags=11%, list=7%, signal=11%
HALLMARK_GLYCOLYSIS	165	0.57974	1.26758	0.0934343	0.264994	0.995	1336	tags=15%, list=10%, signal=16%
HALLMARK_ESTROGEN_RESPONSE_EARLY	143	0.576623	1.2462	0.138365	0.270538	1	1444	tags=20%, list=11%, signal=22%
HALLMARK_KRAS_SIGNALING_UP	112	0.585048	1.22756	0.16623	0.272826	1	844	tags=11%, list=6%, signal=11%
HALLMARK_UV_RESPONSE_DN	107	0.573077	1.21595	0.178571	0.275542	1	1014	tags=15%, list=7%, signal=16%
HALLMARK_TGF_BETA_SIGNALING	46	0.661623	1.26981	0.166927	0.280069	0.995	829	tags=17%, list=6%, signal=18%
HALLMARK_APOPTOSIS	131	-0.477269	-1.19304	0.195652	0.3202	0.896	272	tags=8%, list=2%, signal=8%
HALLMARK_ANGIOGENESIS	18	-0.579441	-1.10415	0.352798	0.447375	0.977	33	tags=6%, list=0%, signal=6%
HALLMARK_ALLOGRAFT_REJECTION	152	-0.395186	-1.04075	0.340611	0.463183	0.996	354	tags=5%, list=3%, signal=5%
HALLMARK_ESTROGEN_RESPONSE_LATE	132	0.511461	1.10046	0.314536	0.465687	1	1618	tags=19%, list=12%, signal=21%
HALLMARK_PROTEIN_SECRETION	90	-0.448141	-1.07382	0.290837	0.466018	0.984	675	tags=8%, list=5%, signal=8%
HALLMARK_G2M_CHECKPOINT	192	0.480344	1.08773	0.325871	0.46897	1	134	tags=2%, list=1%, signal=2%
HALLMARK_HEDGEHOG_SIGNALING	25	0.588117	1.07343	0.391162	0.47568	1	428	tags=8%, list=3%, signal=8%
HALLMARK_DNA_REPAIR	144	-0.400472	-1.04884	0.342995	0.482366	0.995	761	tags=7%, list=6%, signal=7%
HALLMARK_HEME_METABOLISM	153	0.47226	1.03077	0.422642	0.516388	1	1879	tags=19%, list=14%, signal=22%
HALLMARK_OXIDATIVE_PHOSPHORYLATION	198	0.457571	1.01395	0.43154	0.527827	1	4084	tags=40%, list=30%, signal=57%
HALLMARK_IL2_STAT5_SIGNALING	168	0.471953	1.03137	0.403487	0.536756	1	917	tags=12%, list=7%, signal=13%
HALLMARK_MITOTIC_SPINDLE	191	0.421713	0.936198	0.581423	0.657959	1	1225	tags=12%, list=9%, signal=12%
HALLMARK_HYPOXIA	157	0.417257	0.916324	0.624384	0.67045	1	744	tags=10%, list=5%, signal=11%
HALLMARK_PI3K_AKT_MTOR_SIGNALING	91	-0.363316	-0.896183	0.613718	0.77417	0.999	1432	tags=19%, list=10%, signal=21%
HALLMARK_P53_PATHWAY	173	0.381057	0.835765	0.777778	0.788475	1	954	tags=13%, list=7%, signal=13%
HALLMARK_APICAL_SURFACE	31	-0.417392	-0.863839	0.648649	0.802913	0.999	449	tags=6%, list=3%, signal=7%
HALLMARK_UNFOLDED_PROTEIN_RESPONSE	108	0.373718	0.785019	0.801097	0.843969	1	752	tags=9%, list=5%, signal=10%
HALLMARK_REACTIVE_OXYGEN_SPECIES_PATHWAY	47	-0.364721	-0.80565	0.784314	0.886519	1	521	tags=6%, list=4%, signal=7%
HALLMARK_WNT_BETA_CATENIN_SIGNALING	33	-0.309859	-0.654432	0.930362	0.979378	1	2644	tags=27%, list=19%, signal=34%
HALLMARK_NOTCH_SIGNALING	28	0.233361	0.428288	0.998317	0.999726	1	3459	tags=29%, list=25%, signal=38%

## Sheet: D21 IFNvsCtrl
NAME	SIZE	ES	NES	NOM p-val	FDR q-val	FWER p-val	RANK AT MAX	LEADING EDGE	Leading edge genes
HALLMARK_INTERFERON_ALPHA_RESPONSE	96	0.960929	1.67981	0	0.00621901	0.006	493	tags=61%, list=3%, signal=63%	IRF1,TAP1,GBP4,GBP2,PARP9,TRAFD1,STAT2,TRIM21,EPSTI1,TMEM140,UBE2L6,PARP14,NUB1,SP110,IRF9,PLSCR1,BATF2,CSF1,CXCL10,SLC25A28,IFITM1,IRF2,RSAD2,TRIM25,IFI35,RIPK2,SAMD9L,IFIT2,PARP12,PSMB9,NMI,OAS1,OGFR,OASL,IFIT3,LAP3,CMPK2,CMTR1,RNF31,LAMP3,IFI27,RTP4,PSMB8,TRIM5,TRIM26,ADAR,CXCL11,IRF7,LGALS3BP,DDX60,ISG20,HELZ2,IFIH1,IFI44L,IFITM2,UBA7,MX1,USP18,MOV10,
HALLMARK_IL6_JAK_STAT3_SIGNALING	74	0.944242	1.65687	0.00118765	0.0184239	0.054	389	tags=23%, list=2%, signal=23%	IRF1,TAP1,GBP4,TRAFD1,APOL6,CXCL9,STAT2,BPGM,IRF8,TRIM21,EPSTI1,NLRC5,STAT3,STAT1,UBE2L6,SOCS3,IL15RA,PARP14,SOCS1,TNFSF10,IRF5,CD38,SP110,IRF9,PLSCR1,BATF2,RNF213,SOD2,CXCL10,SLC25A28,IRF2,PML,ZNFX1,IL18BP,RSAD2,TRIM25,RBCK1,IFI35,RIPK2,CD274,SAMD9L,IFIT2,PARP12,DDX58,PSMB9,NMI,ICAM1,OGFR,OASL,ISOC1,IFIT3,MYD88,LAP3,XAF1,PTPN1,JAK2,CASP7,CMPK2,PNP,CMTR1,RNF31,IFI27,RTP4,SERPING1,PSMB8,MVP,TRIM26…
HALLMARK_INTERFERON_GAMMA_RESPONSE	188	0.952142	1.65842	0	0.0251648	0.049	561	tags=50%, list=4%, signal=51%	IRF1,CXCL9,STAT2,STAT3,STAT1,SOCS3,IL15RA,SOCS1,CD38,IRF9,CSF1,CXCL10,MYD88,PTPN1,BAK1,CXCL11,TNF
HALLMARK_UV_RESPONSE_UP	136	0.924616	1.63608	0.00327869	0.0396501	0.147	455	tags=8%, list=3%, signal=8%	IRF1,TAP1,SOD2,ICAM1,ABCB1,DNAJA1,HLA-F,BAK1,PRPF3,ATF3,MARK2
HALLMARK_ALLOGRAFT_REJECTION	161	0.916371	1.60934	0	0.0762809	0.319	389	tags=14%, list=2%, signal=14%	TAP1,GBP2,CXCL9,IRF8,ITK,STAT1,SOCS1,CSF1,HLA-E,CTSS,TAP2,RIPK2,CCND2,ICAM1,BCL3,JAK2,ELF4,TAPBP,IL10,IRF7,PSMB10,TNF
HALLMARK_TNFA_SIGNALING_VIA_NFKB	187	0.893125	1.54882	0.002079	0.14008	0.713	439	tags=16%, list=3%, signal=16%
HALLMARK_REACTIVE_OXYGEN_SPECIES_PATHWAY	48	0.886891	1.53846	0.0718789	0.144526	0.766	93	tags=4%, list=1%, signal=4%
HALLMARK_COMPLEMENT	161	0.882831	1.55127	0.0116649	0.152755	0.701	537	tags=15%, list=3%, signal=15%
HALLMARK_INFLAMMATORY_RESPONSE	161	0.895152	1.55461	0.00316122	0.163959	0.676	362	tags=15%, list=2%, signal=15%
HALLMARK_IL2_STAT5_SIGNALING	178	0.868785	1.51841	0.00732218	0.170917	0.856	507	tags=14%, list=3%, signal=14%
HALLMARK_APOPTOSIS	141	0.902969	1.55501	0.00320856	0.190299	0.676	439	tags=13%, list=3%, signal=13%
HALLMARK_P53_PATHWAY	180	0.850323	1.49757	0.0251309	0.197422	0.922	542	tags=6%, list=3%, signal=6%
HALLMARK_UV_RESPONSE_DN	121	-0.406618	-1.29892	0.0657895	0.252492	0.456	886	tags=21%, list=6%, signal=22%
HALLMARK_CHOLESTEROL_HOMEOSTASIS	67	0.832423	1.44826	0.0953516	0.289136	0.983	439	tags=10%, list=3%, signal=11%
HALLMARK_PI3K_AKT_MTOR_SIGNALING	93	0.814416	1.43596	0.111364	0.29583	0.989	496	tags=5%, list=3%, signal=6%
HALLMARK_KRAS_SIGNALING_UP	128	0.794621	1.41305	0.115385	0.322864	0.994	608	tags=10%, list=4%, signal=10%
HALLMARK_PANCREAS_BETA_CELLS	15	-0.620394	-1.33163	0.155388	0.420131	0.401	3375	tags=47%, list=22%, signal=59%
HALLMARK_NOTCH_SIGNALING	32	0.77593	1.32351	0.221745	0.477321	1	716	tags=9%, list=5%, signal=10%
HALLMARK_XENOBIOTIC_METABOLISM	142	0.704509	1.24708	0.234043	0.576264	1	603	tags=7%, list=4%, signal=7%
HALLMARK_ANGIOGENESIS	19	0.734869	1.25428	0.302135	0.594686	1	1045	tags=11%, list=7%, signal=11%
HALLMARK_ESTROGEN_RESPONSE_EARLY	154	0.653068	1.13815	0.337924	0.655799	1	585	tags=8%, list=4%, signal=9%
HALLMARK_KRAS_SIGNALING_DN	97	0.644446	1.14628	0.323094	0.668187	1	478	tags=7%, list=3%, signal=7%
HALLMARK_HEME_METABOLISM	165	0.659076	1.15608	0.299788	0.678123	1	1503	tags=15%, list=10%, signal=16%
HALLMARK_HEDGEHOG_SIGNALING	28	0.678388	1.15868	0.340741	0.706293	1	338	tags=11%, list=2%, signal=11%
HALLMARK_UNFOLDED_PROTEIN_RESPONSE	108	0.664935	1.16626	0.306077	0.725323	1	990	tags=13%, list=6%, signal=14%
HALLMARK_FATTY_ACID_METABOLISM	129	0.60849	1.06743	0.414424	0.742688	1	1138	tags=7%, list=7%, signal=7%
HALLMARK_PROTEIN_SECRETION	91	0.589386	1.0497	0.43424	0.75044	1	1050	tags=9%, list=7%, signal=9%
HALLMARK_PEROXISOME	91	0.597796	1.06951	0.393258	0.76937	1	533	tags=8%, list=3%, signal=8%
HALLMARK_APICAL_SURFACE	34	-0.328211	-0.825298	0.70073	0.777498	0.991	1402	tags=15%, list=9%, signal=16%
HALLMARK_GLYCOLYSIS	170	-0.284788	-0.909102	0.611111	0.780742	0.98	1286	tags=13%, list=8%, signal=14%
HALLMARK_BILE_ACID_METABOLISM	83	0.56694	0.990755	0.491228	0.805097	1	533	tags=7%, list=3%, signal=7%
HALLMARK_ADIPOGENESIS	178	0.507124	0.892993	0.611863	0.812079	1	571	tags=4%, list=4%, signal=4%
HALLMARK_MYC_TARGETS_V2	58	0.576366	1.00181	0.48977	0.812962	1	4175	tags=47%, list=27%, signal=63%
HALLMARK_ESTROGEN_RESPONSE_LATE	146	0.512727	0.905576	0.609257	0.817949	1	476	tags=5%, list=3%, signal=5%
HALLMARK_MITOTIC_SPINDLE	193	0.523845	0.910467	0.613003	0.835204	1	1096	tags=10%, list=7%, signal=10%
HALLMARK_WNT_BETA_CATENIN_SIGNALING	39	0.544875	0.938611	0.54073	0.840698	1	2302	tags=28%, list=15%, signal=33%
HALLMARK_MYOGENESIS	136	0.534061	0.948297	0.533762	0.852109	1	752	tags=6%, list=5%, signal=6%
HALLMARK_COAGULATION	85	0.513575	0.91338	0.592379	0.857265	1	521	tags=6%, list=3%, signal=6%
HALLMARK_HYPOXIA	164	0.455043	0.798329	0.738624	0.92122	1	1176	tags=14%, list=7%, signal=15%
HALLMARK_APICAL_JUNCTION	144	0.415879	0.727207	0.793103	0.9596	1	1563	tags=12%, list=10%, signal=13%
HALLMARK_MTORC1_SIGNALING	194	0.361112	0.62925	0.903766	0.961971	1	1575	tags=10%, list=10%, signal=11%
HALLMARK_G2M_CHECKPOINT	192	0.387146	0.670516	0.856994	0.971236	1	1317	tags=9%, list=8%, signal=10%
HALLMARK_SPERMATOGENESIS	82	0.4303	0.739385	0.778037	0.972398	1	1438	tags=11%, list=9%, signal=12%
HALLMARK_TGF_BETA_SIGNALING	50	0.398295	0.691046	0.795918	0.975165	1	1959	tags=18%, list=12%, signal=21%
HALLMARK_OXIDATIVE_PHOSPHORYLATION	198	0.267539	0.461746	0.986612	0.980465	1	4894	tags=36%, list=31%, signal=52%
HALLMARK_DNA_REPAIR	145	0.355621	0.632502	0.884822	0.982876	1	3109	tags=23%, list=20%, signal=28%
HALLMARK_ANDROGEN_RESPONSE	86	-0.301225	-0.925877	0.61745	0.985218	0.975	2484	tags=22%, list=16%, signal=26%
HALLMARK_E2F_TARGETS	198	0.266509	0.469496	0.987487	0.999839	1	4644	tags=37%, list=30%, signal=52%
HALLMARK_EPITHELIAL_MESENCHYMAL_TRANSITION	132	0.309575	0.545382	0.951974	1	1	1488	tags=11%, list=9%, signal=12%
HALLMARK_MYC_TARGETS_V1	196	0.28708	0.501656	0.984504	1	1	4203	tags=34%, list=27%, signal=46%

## Sheet: SiblingT21 IFNvsCtrl
NAME	SIZE	ES	NES	NOM p-val	FDR q-val	FWER p-val	RANK AT MAX	LEADING EDGE	Leading edge genes
HALLMARK_INTERFERON_ALPHA_RESPONSE	96	0.953954	1.82186	0	0	0	494	tags=59%, list=3%, signal=61%	IRF1,TAP1,GBP4,GBP2,TRAFD1,PARP9,STAT2,CXCL10,PARP14,TRIM21,EPSTI1,RSAD2,SAMD9L,TMEM140,BATF2,IFIT2,UBE2L6,RIPK2,PLSCR1,TRIM25,SP110,LAP3,NUB1,PARP12,CMPK2,TDRD7,IRF2,SLC25A28,OAS1,NMI,CXCL11,OASL,TRIM5,IFIH1,IFI35,IFITM1,HELZ2,IFIT3,CMTR1,USP18,PSMB9,CASP1,IFITM3,DDX60,PSMB8,RTP4,IRF9,IFI27,MX1,LGALS3BP,DHX58,ADAR,IFI44L,IRF7,IFI44,CSF1,EIF2AK2,
HALLMARK_INTERFERON_GAMMA_RESPONSE	188	0.942236	1.81339	0	0	0	697	tags=55%, list=4%, signal=57%	IRF1,TAP1,GBP4,BPGM,TRAFD1,CXCL9,APOL6,STAT2,TNFSF10,SOD2,CXCL10,PARP14,IRF8,NLRC5,TRIM21,EPSTI1,RNF213,DDX58,RSAD2,SOCS1,SAMD9L,IL15RA,BATF2,IFIT2,SAMHD1,UBE2L6,RIPK2,PLSCR1,TRIM25,SP110,LAP3,CD38,STAT1,SERPING1,IL18BP,PARP12,CMPK2,PML,TDRD7,IRF2,RBCK1,PTPN1,SLC25A28,PTPN2,ZNFX1,NMI,CXCL11,OASL,SECTM1,IFIH1,IFI35,JAK2,ISOC1,SOCS3,HELZ2,CASP7,IFIT3,CMTR1,USP18,MYD88,XAF1,OAS2,PSMB9,CASP1,IFITM3,D…
HALLMARK_IL6_JAK_STAT3_SIGNALING	74	0.926148	1.73743	0	0.00191783	0.006	558	tags=27%, list=4%, signal=28%	IRF1,CXCL9,STAT2,CXCL10,SOCS1,IL15RA,CD38,STAT1,PTPN1,PTPN2,CXCL11,SOCS3,MYD88,STAT3,IRF9,CSF1,CSF2RB,FAS,TNF,CBL,
HALLMARK_INFLAMMATORY_RESPONSE	161	0.882959	1.70257	0	0.00862573	0.036	691	tags=21%, list=4%, signal=22%	IRF1,CXCL9,TNFSF10,CXCL10,P2RX7,IL15RA,KIF1B,RIPK2,FZD5,AHR,NMI,CXCL11,RGS1,IFITM1,CYBB,IL10,RTP4,MXD1,IL10RA,HIF1A,IRF7,SLAMF1,CSF1,EIF2AK2,NAMPT,ICAM1,TAPBP,GCH1,LDLR,BST2,CDKN1A,PDE4B,IL6,SLC31A2,
HALLMARK_UV_RESPONSE_UP	136	0.893905	1.69341	0.00121359	0.00976809	0.05	26	tags=2%, list=0%, signal=2%	IRF1,TAP1,SOD2
HALLMARK_APOPTOSIS	141	0.886872	1.6655	0	0.016914	0.118	707	tags=18%, list=5%, signal=18%	IRF1,TAP1,TNFSF10,SOD2,HGF,CD38,MCL1,CASP7,CASP1,IFITM3,PLAT,CCND2,CASP4,DNAJA1,FAS,TNF,CTNNB1,GADD45B,ISG20,NEDD9,GCH1,CDKN1A,IL6,LEF1,CFLAR,
HALLMARK_COMPLEMENT	161	0.877157	1.67035	0.0011655	0.017004	0.102	461	tags=14%, list=3%, signal=15%	IRF1,MSRB1,CEBPB,PLSCR1,LAP3,SERPING1,IRF2,ERAP2,DOCK10,JAK2,CTSO,CTSS,GNB4,CASP7,VCPIP1,MAFF,PSMB9,CASP1,PLAT,CASP4,USP15,KIF2A,IRF7,
HALLMARK_ALLOGRAFT_REJECTION	161	0.854919	1.63384	0.0023068	0.0333964	0.246	607	tags=13%, list=4%, signal=13%	TAP1,GBP2,CXCL9,IRF8,SOCS1,ITK,RIPK2,STAT1,TAP2,JAK2,HLA-E,CTSS,IL10,CCND2,HIF1A,IRF7,CSF1,FAS,TNF,ICAM1,TAPBP,
HALLMARK_TNFA_SIGNALING_VIA_NFKB	187	0.829027	1.60745	0.0101466	0.0514515	0.385	707	tags=17%, list=5%, signal=18%	IRF1,TAP1,SOD2,CXCL10,CEBPB,DDX58,IL15RA,IFIT2,RIPK2,BCL6,CXCL11,IFIH1,MCL1,ETS2,SOCS3,MAFF,SLC2A3,MXD1,CSF1,NFAT5,TNF,NAMPT,GADD45B,ICAM1,GCH1,LDLR,DUSP5,B4GALT5,CDKN1A,PDE4B,IL6,CFLAR,
HALLMARK_IL2_STAT5_SIGNALING	178	0.817244	1.56137	0.0135593	0.0900563	0.617	563	tags=13%, list=4%, signal=13%	GBP4,TNFSF10,CISH,CXCL10,IRF8,TLR7,SOCS1,PLSCR1,AHR,BATF3,IL10,MAFF,IFITM3,CCND2,SLC2A3,MXD1,CDC42SE2,IL10RA,POU2F1,PHTF2,CSF1,ABCB1,GADD45B,
HALLMARK_KRAS_SIGNALING_UP	128	0.783134	1.47818	0.044686	0.182328	0.884	965	tags=14%, list=6%, signal=15%
HALLMARK_PROTEIN_SECRETION	91	0.745531	1.40272	0.10719	0.279883	0.986	840	tags=11%, list=5%, signal=12%
HALLMARK_REACTIVE_OXYGEN_SPECIES_PATHWAY	48	0.784477	1.40769	0.103759	0.29352	0.983	37	tags=4%, list=0%, signal=4%
HALLMARK_P53_PATHWAY	180	0.716007	1.36871	0.0917327	0.3258	0.993	366	tags=3%, list=2%, signal=3%
HALLMARK_CHOLESTEROL_HOMEOSTASIS	67	0.729005	1.34688	0.159836	0.341908	0.997	640	tags=9%, list=4%, signal=9%
HALLMARK_HEME_METABOLISM	165	0.682073	1.30622	0.155429	0.395626	0.998	642	tags=7%, list=4%, signal=7%
HALLMARK_PI3K_AKT_MTOR_SIGNALING	93	0.692918	1.27487	0.199475	0.428863	1	908	tags=10%, list=6%, signal=10%
HALLMARK_PEROXISOME	91	0.656323	1.24084	0.22526	0.467814	1	545	tags=8%, list=3%, signal=8%
HALLMARK_SPERMATOGENESIS	82	0.624497	1.17222	0.297226	0.572017	1	887	tags=9%, list=6%, signal=9%
HALLMARK_XENOBIOTIC_METABOLISM	142	0.599425	1.13996	0.318824	0.60224	1	1226	tags=13%, list=8%, signal=14%
HALLMARK_MITOTIC_SPINDLE	193	0.562766	1.08542	0.36939	0.675683	1	1400	tags=17%, list=9%, signal=19%
HALLMARK_UNFOLDED_PROTEIN_RESPONSE	108	0.557683	1.06689	0.370049	0.680613	1	1434	tags=14%, list=9%, signal=15%
HALLMARK_APICAL_JUNCTION	144	-0.445555	-1.24854	0.0628931	0.71201	0.711	1825	tags=19%, list=12%, signal=21%
HALLMARK_BILE_ACID_METABOLISM	83	0.540883	1.01309	0.453826	0.748097	1	545	tags=6%, list=3%, signal=6%
HALLMARK_ESTROGEN_RESPONSE_LATE	146	0.50134	0.960228	0.506478	0.754743	1	685	tags=5%, list=4%, signal=6%
HALLMARK_ESTROGEN_RESPONSE_EARLY	154	0.497572	0.968509	0.506977	0.769191	1	538	tags=6%, list=3%, signal=7%
HALLMARK_WNT_BETA_CATENIN_SIGNALING	39	-0.504264	-1.16872	0.256267	0.781392	0.864	2000	tags=36%, list=13%, signal=41%
HALLMARK_FATTY_ACID_METABOLISM	129	0.516913	0.973798	0.516588	0.790508	1	1497	tags=12%, list=10%, signal=13%
HALLMARK_UV_RESPONSE_DN	121	-0.310164	-0.846798	0.827586	0.854391	0.999	1829	tags=17%, list=12%, signal=19%
HALLMARK_PANCREAS_BETA_CELLS	15	-0.416822	-0.798214	0.739496	0.864978	1	2297	tags=27%, list=15%, signal=31%
HALLMARK_COAGULATION	85	0.459892	0.856602	0.652455	0.874868	1	301	tags=5%, list=2%, signal=5%
HALLMARK_KRAS_SIGNALING_DN	97	0.46867	0.865089	0.624196	0.891956	1	562	tags=7%, list=4%, signal=7%
HALLMARK_EPITHELIAL_MESENCHYMAL_TRANSITION	132	-0.473352	-1.3147	0.0490798	0.908424	0.541	1966	tags=17%, list=13%, signal=19%
HALLMARK_GLYCOLYSIS	170	-0.301435	-0.858977	0.832	0.910671	0.999	2388	tags=21%, list=15%, signal=25%
HALLMARK_MYOGENESIS	136	-0.320899	-0.90584	0.7	0.971991	0.999	1990	tags=18%, list=13%, signal=20%
HALLMARK_APICAL_SURFACE	34	-0.390454	-0.869989	0.688776	0.97855	0.999	3479	tags=29%, list=22%, signal=38%
HALLMARK_OXIDATIVE_PHOSPHORYLATION	198	0.287147	0.540034	0.990981	0.983459	1	4068	tags=33%, list=26%, signal=44%
HALLMARK_ADIPOGENESIS	178	0.389407	0.749491	0.793982	0.98948	1	1188	tags=6%, list=8%, signal=6%
HALLMARK_E2F_TARGETS	198	0.397912	0.764541	0.793407	0.998311	1	3211	tags=29%, list=20%, signal=36%
HALLMARK_G2M_CHECKPOINT	192	0.352928	0.675923	0.872	0.998561	1	2018	tags=17%, list=13%, signal=19%
HALLMARK_ANGIOGENESIS	19	0.421433	0.71897	0.751361	1	1	940	tags=16%, list=6%, signal=17%
HALLMARK_HEDGEHOG_SIGNALING	28	0.391724	0.695805	0.784512	1	1	801	tags=14%, list=5%, signal=15%
HALLMARK_HYPOXIA	164	0.322595	0.620999	0.948157	1	1	971	tags=8%, list=6%, signal=8%
HALLMARK_MTORC1_SIGNALING	194	0.312842	0.599634	0.975169	1	1	1528	tags=11%, list=10%, signal=12%
HALLMARK_MYC_TARGETS_V1	196	0.308325	0.593688	0.967416	1	1	4070	tags=32%, list=26%, signal=42%
HALLMARK_MYC_TARGETS_V2	58	0.300835	0.543166	0.954286	1	1	210	tags=2%, list=1%, signal=2%
HALLMARK_TGF_BETA_SIGNALING	50	-0.429772	-1.03203	0.396396	1	0.982	674	tags=10%, list=4%, signal=10%
HALLMARK_NOTCH_SIGNALING	32	-0.423565	-0.947204	0.54359	1	0.997	1699	tags=28%, list=11%, signal=31%
HALLMARK_ANDROGEN_RESPONSE	86	-0.355938	-0.935968	0.551181	1	0.997	1011	tags=6%, list=6%, signal=6%
HALLMARK_DNA_REPAIR	145	-0.324153	-0.920038	0.655172	1	0.999	2217	tags=17%, list=14%, signal=20%

## Sheet: SiblingT21 CAvsCtrl 24hrs
NAME	SIZE	ES	NES	NOM p-val	FDR q-val	FWER p-val	RANK AT MAX	LEADING EDGE	Leading edge genes
HALLMARK_MYC_TARGETS_V1	195	-0.807115	-2.26261	0	0	0	1790	tags=60%, list=10%, signal=66%	ORC2,USP1,TARDBP,TOMM70,UBE2L3,CAD,CBX3,PPIA,HNRNPA3,YWHAQ,VBP1,NOP16,PSMD1,PRPS2,LSM7,XPOT,EIF2S1,SNRPB2,XRCC6,TXNL4A,CCT2,ILF2,MCM6,PSMC6,HSPD1,SSB,NHP2,CCNA2,NME1,EIF1AX,HPRT1,LDHA,HSPE1,PSMD3,SNRPD1,ABCE1,PSMB2,SNRPA,EIF2S2,CDC20,PSMD14,SRM,EIF3B,DDX18,TCP1,SF3A1,PSMA7,RNPS1,FBL,CCT7,HNRNPA1,DHX15,UBA2,PSMA2,POLD2,EIF3J,CCT3,SNRPG,TRA2B,SRPK1,HNRNPU,NPM1,MAD2L1,YWHAE,CCT4,SF3B3,KPNB1,SET,GOT2…
HALLMARK_E2F_TARGETS	198	-0.808186	-2.15749	0	0	0	1308	tags=52%, list=7%, signal=55%	SPAG5,SPC25,PRPS1,TIPIN,TACC3,EIF2S1,SMC4,CKS2,SUV39H1,XRCC6,CNOT9,NUP107,TIMELESS,CHEK1,MMS22L,RAD1,NUP153,POLA2,NUP205,MELK,MCM6,SMC1A,NME1,PLK1,EZH2,BRCA1,PLK4,DCTPP1,CCNE1,CBX5,CENPM,CDCA8,CDC20,NAA38,SPC24,POLD2,RAD21,TRA2B,MSH2,MAD2L1,PNN,PRKDC,MYBL2,UBE2T,CSE1L,POLE,XPO1,DSCC1,AK2,RAN,NOP56,AURKB,SSRP1,UNG,CENPE,POLD1,SMC3,MCM7,NASP,LYAR,KIF18B,ASF1B,UBE2S,DEK,RBBP7,TP53,NBN,SRSF1,LIG1,SRS…
HALLMARK_G2M_CHECKPOINT	193	-0.656814	-1.75489	0	0.00145833	0.004	1304	tags=41%, list=7%, signal=44%	DTYMK,TACC3,SMC4,CKS2,SUV39H1,CHEK1,STIL,POLA2,SMC2,PAFAH1B1,MCM6,SMC1A,CCNA2,CENPA,PLK1,EZH2,PBK,PLK4,SNRPD1,EWSR1,CHAF1A,CDC20,KIF15,KIF20B,WRN,POLQ,CDC7,SFPQ,RAD21,TRA2B,HNRNPU,MAD2L1,RAD54L,MT2A,MYBL2,KPNB1,KIF23,POLE,NSD2,XPO1,SLC7A1,DKC1,E2F1,AURKB,CENPE,FBXO5,INCENP,NUP50,TFDP1,NCL,NASP,UBE2S,EXO1,RBM14,SRSF1,CDC45,SRSF2,KIF11,CCNF,G3BP1,BRCA2,NOLC1,ESPL1,TMPO,MCM3,CDC25A,CDK1,MCM5,TGFB1,D…
HALLMARK_MYC_TARGETS_V2	57	-0.71993	-1.67914	0	0.00632776	0.018	1664	tags=68%, list=10%, signal=75%	EXOSC5,CBX3,SORD,TBRG4,NOP16,PRMT3,NIP7,PPRC1,NOC4L,NDUFAF4,HSPD1,PLK1,WDR74,HSPE1,PLK4,GRWD1,DCTPP1,RCL1,PES1,SRM,DDX18,WDR43,NPM1,SLC19A1,FARSA,RRP12,NOP56,UNG,MYBBP1A,UTP20,MRTO4,TCOF1,IPO4,HK2,NOLC1,MCM5,CDK4,PA2G4,MCM4
HALLMARK_CHOLESTEROL_HOMEOSTASIS	67	0.84945	1.54955	0.00252207	0.0403463	0.042	1005	tags=43%, list=6%, signal=46%	TP53INP1,LGMN,GLDC,ETHE1,TMEM97,ACSS2,SCD,LDLR,LSS,FDPS,FDFT1,FADS2,ALCAM,SQLE,CD9,LGALS3,PNRC1,CYP51A1,HMGCR,ECH1,EBP,CPEB2,SC5D,MVD,ACAT2,PCYT2,STARD4,ALDOC,TM7SF2
HALLMARK_DNA_REPAIR	146	-0.565519	-1.50138	0	0.0372217	0.129	2026	tags=29%, list=12%, signal=33%	SF3A3,ITPA,POLR2E,GTF2A2,POLE4,POM121,POLA1,RAE1,UMPS,TSG101,NME4,GSDME,NELFCD,REV3L,GPX4,RALA,CSTF3,RAD51,POLA2,SRSF6,NME1,HPRT1,ADRM1,CMPK2,DDB2,DGCR8,ZWINT,POLR2H,PRIM1,USP11,SSRP1,POLD1,FEN1,TP53,ALYREF,LIG1,RFC3,POLD3,NUDT21,DUT,TYMS,IMPDH2,PCNA
HALLMARK_KRAS_SIGNALING_UP	149	0.764623	1.50061	0.00110011	0.0722216	0.143	1256	tags=20%, list=7%, signal=22%	LAPTM5,ST6GAL1,PRDM1,TRIB1,IKZF1,CXCR4,ETS1,LCP1,IRF8,ID2,NIN,EREG,TNFRSF1B,RABGAP1L,BPGM,AKAP12,CMKLR1,TRIB2,FUCA1,TNFAIP3,DNMBP,RGS16,IL10RA,KCNN4,DCBLD2,GLRX,CAB39L,DOCK2,ABCB1,ZNF277
HALLMARK_IL2_STAT5_SIGNALING	186	0.744986	1.47034	0.00433369	0.0978475	0.264	982	tags=24%, list=6%, signal=25%	NCOA3,SELL,TLR7,BHLHE40,IL10,MAPKAPK2,ADAM19,RRAGD,BCL2,AHNAK,NT5E,SWAP70,IRF8,SLC2A3,KLF6,HIPK2,IRF4,MYO1E,IKZF2,ALCAM,CASP3,RHOH,LTB,AHR,TNFRSF1B,RABGAP1L,SNX9,MXD1,PHTF2,SLC39A8,FURIN,TNFRSF21,CD44,IL2RA,PIM1,BCL2L1,ANXA4,CKAP4,LRIG1,IFNGR1,CDC42SE2,RGS16,IL10RA,POU2F1
HALLMARK_EPITHELIAL_MESENCHYMAL_TRANSITION	145	0.739383	1.45816	0.00443951	0.0909816	0.318	1325	tags=23%, list=8%, signal=25%	FLNA,MYL9,TPM4,GLIPR1,NT5E,SNTB1,VCAN,ID2,DST,CXCL12,PLOD1,GADD45A,CD59,IGFBP4,LOXL2,ITGB1,CADM1,CD44,PMEPA1,MEST,FUCA1,TPM2,TNFAIP3,SAT1,ACTA2,LAMC1,COPA,QSOX1,FERMT2,SPOCK1,FN1,VIM,P3H1,COL5A1
HALLMARK_HYPOXIA	169	0.733592	1.44561	0.00323974	0.0910808	0.38	1472	tags=24%, list=8%, signal=26%	BTG1,BHLHE40,PLAC8,SLC2A5,CXCR4,ETS1,RRAGD,BCL2,SLC2A3,TIPARP,KLF7,ATP7A,KLF6,WSB1,TPD52,KLHL24,MYH9,NR3C1,CDKN1B,PNRC1,DDIT4,KDM3A,AKAP12,CHST2,PIM1,RBPJ,GPC4,TNFAIP3,SIAH2,ALDOC,NAGK,GLRX,EXT1,TMEM45A,P4HA2,COL5A1,PRDX5,CAVIN1,PDK1,HDLBP
HALLMARK_OXIDATIVE_PHOSPHORYLATION	198	-0.477608	-1.3106	0.031746	0.115973	0.422	3487	tags=44%, list=20%, signal=55%	ATP6V0B,NDUFB6,COX10,PDHB,ATP6V1H,ATP5PF,NDUFS1,PRDX3,DLAT,COX7A2,ETFA,COX17,RHOT2,ATP5MF,POLR2F,SLC25A3,FXN,SLC25A11,MRPL34,GPI,GRPEL1,CYB5A,SUPV3L1,ATP1B1,UQCRC1,TCIRG1,ABCB7,SUCLA2,MRPL11,ETFDH,MRPL35,HADHB,FH,VDAC2,ECI1,NDUFA5,ACADVL,ACO2,ETFB,COX7B,ATP6V1D,PHB2,ATP5F1A,LDHB,MRPS11,AFG3L2,TIMM13,NDUFS4,ATP5F1D,ATP5F1C,TOMM70,DLD,SLC25A12,SLC25A4,ATP5ME,UQCRFS1,ATP6V0C,NDUFB7,PDHA1,OPA1,BAX,CO…
HALLMARK_PANCREAS_BETA_CELLS	21	0.844974	1.42062	0.0524691	0.120524	0.535	1551	tags=33%, list=9%, signal=37%
HALLMARK_TNFA_SIGNALING_VIA_NFKB	191	0.712931	1.39909	0.0117773	0.146372	0.658	960	tags=20%, list=6%, signal=21%
HALLMARK_KRAS_SIGNALING_DN	109	0.736064	1.39774	0.0241379	0.130895	0.663	1035	tags=9%, list=6%, signal=10%
HALLMARK_ANDROGEN_RESPONSE	90	0.731997	1.39739	0.0436364	0.116769	0.663	969	tags=26%, list=6%, signal=27%
HALLMARK_ESTROGEN_RESPONSE_EARLY	159	0.69811	1.37414	0.0250545	0.143122	0.78	1342	tags=25%, list=8%, signal=26%
HALLMARK_APICAL_JUNCTION	158	0.701754	1.3686	0.0232816	0.140777	0.799	818	tags=14%, list=5%, signal=14%
HALLMARK_UV_RESPONSE_DN	128	0.685248	1.3252	0.056243	0.213631	0.937	1245	tags=18%, list=7%, signal=19%
HALLMARK_COAGULATION	89	0.702059	1.32124	0.0843521	0.205139	0.944	1360	tags=16%, list=8%, signal=17%
HALLMARK_MYOGENESIS	143	0.669698	1.31036	0.0627753	0.212364	0.957	1056	tags=10%, list=6%, signal=11%
HALLMARK_ALLOGRAFT_REJECTION	168	0.657748	1.29246	0.0784314	0.237809	0.981	1146	tags=23%, list=7%, signal=24%
HALLMARK_PI3K_AKT_MTOR_SIGNALING	94	-0.361926	-0.935763	0.573333	0.751816	0.986	1693	tags=22%, list=10%, signal=25%
HALLMARK_PEROXISOME	91	0.682832	1.28262	0.119617	0.244745	0.99	1434	tags=24%, list=8%, signal=26%
HALLMARK_REACTIVE_OXYGEN_SPECIES_PATHWAY	49	-0.395049	-0.895563	0.621723	0.768099	0.992	1835	tags=31%, list=11%, signal=34%
HALLMARK_NOTCH_SIGNALING	32	-0.425017	-0.892761	0.618012	0.687248	0.992	2427	tags=22%, list=14%, signal=25%
HALLMARK_ESTROGEN_RESPONSE_LATE	147	0.647527	1.26419	0.0950783	0.270989	0.995	1094	tags=18%, list=6%, signal=19%
HALLMARK_COMPLEMENT	163	0.64446	1.26253	0.0798226	0.259707	0.996	1756	tags=25%, list=10%, signal=27%
HALLMARK_INTERFERON_ALPHA_RESPONSE	95	0.66137	1.251	0.14269	0.270961	0.996	1169	tags=15%, list=7%, signal=16%
HALLMARK_HEME_METABOLISM	169	0.643613	1.24242	0.101622	0.277661	0.998	2107	tags=24%, list=12%, signal=27%
HALLMARK_APICAL_SURFACE	34	0.708567	1.24011	0.214286	0.268956	0.999	1615	tags=29%, list=9%, signal=32%
HALLMARK_ANGIOGENESIS	23	0.738666	1.2337	0.246246	0.271558	0.999	616	tags=13%, list=4%, signal=14%
HALLMARK_TGF_BETA_SIGNALING	51	0.677974	1.22714	0.188067	0.274048	0.999	753	tags=18%, list=4%, signal=18%
HALLMARK_APOPTOSIS	147	0.625568	1.21015	0.140845	0.297307	0.999	1269	tags=21%, list=7%, signal=23%
HALLMARK_INFLAMMATORY_RESPONSE	167	0.614777	1.20729	0.158798	0.291486	0.999	1687	tags=26%, list=10%, signal=29%
HALLMARK_PROTEIN_SECRETION	92	0.636057	1.18347	0.223669	0.331165	1	2239	tags=29%, list=13%, signal=33%
HALLMARK_P53_PATHWAY	183	0.589271	1.15358	0.212351	0.383553	1	1571	tags=20%, list=9%, signal=21%
HALLMARK_HEDGEHOG_SIGNALING	30	0.670565	1.14911	0.326979	0.379672	1	1033	tags=23%, list=6%, signal=25%
HALLMARK_INTERFERON_GAMMA_RESPONSE	192	0.574993	1.14314	0.244589	0.379817	1	1079	tags=18%, list=6%, signal=19%
HALLMARK_MITOTIC_SPINDLE	196	0.575702	1.13109	0.262084	0.392131	1	1244	tags=14%, list=7%, signal=15%
HALLMARK_SPERMATOGENESIS	87	0.597349	1.11178	0.325387	0.41979	1	1331	tags=11%, list=8%, signal=12%
HALLMARK_XENOBIOTIC_METABOLISM	154	0.569563	1.10581	0.320611	0.418415	1	1019	tags=10%, list=6%, signal=10%
HALLMARK_GLYCOLYSIS	176	0.53816	1.05886	0.404278	0.500535	1	2112	tags=24%, list=12%, signal=27%
HALLMARK_MTORC1_SIGNALING	194	0.521022	1.03499	0.44373	0.53345	1	1261	tags=19%, list=7%, signal=20%
HALLMARK_IL6_JAK_STAT3_SIGNALING	74	0.526296	0.975912	0.5475	0.632607	1	963	tags=23%, list=6%, signal=24%
HALLMARK_UNFOLDED_PROTEIN_RESPONSE	108	0.49796	0.952022	0.56286	0.660826	1	1789	tags=20%, list=10%, signal=23%
HALLMARK_ADIPOGENESIS	176	0.466773	0.915444	0.660619	0.709251	1	1176	tags=9%, list=7%, signal=9%
HALLMARK_FATTY_ACID_METABOLISM	136	0.446031	0.864832	0.716854	0.773989	1	1910	tags=15%, list=11%, signal=16%
HALLMARK_UV_RESPONSE_UP	137	0.438809	0.847144	0.738688	0.781897	1	1207	tags=12%, list=7%, signal=13%
HALLMARK_WNT_BETA_CATENIN_SIGNALING	39	0.46894	0.833035	0.712938	0.7805	1	901	tags=10%, list=5%, signal=11%
HALLMARK_BILE_ACID_METABOLISM	86	0.433846	0.808743	0.783981	0.794516	1	2065	tags=24%, list=12%, signal=28%

[truncated: 8 more sheets: Non-Sibling T21 CAvsCtrl, C5all_NonSibT21 CAvsCtrl, GOBP D21 CAvsCtrl, GOBP D21 CAIFNvsIFN, GOBP SibT21 CAvsCtrl 4hr, GOBP SibT21 CAIFNvsIFN, GOBP NonSibT21 CAvsCtrl, DotPlot Pathways]
