# Supplementary material for: Mediator kinase inhibition suppresses hyperactive interferon signaling in Down syndrome
Source: bioRxiv preprint, doi:10.1101/2023.07.05.547813, version 4 (2024-11-20)
Supplement: Fig1_sourceData5 [file 547813_file06.xlsx]

## Sheet: Data Key
Tab Name	Corresponding Fig.	Description
Upstream SibT21vsD21 RNA	Figure 1_S1F	Predicted upstream regulators responsible for differential gene expression in Sibling T21 relative to D21, using genes with a fold-change >|1.25| and an adjusted p-value <0.1
Pathways SibT21vsD21 metabolites	Figure 1_S1G	IPA pathway analysis (using "Diseases & Functions" list) using metabolites differentially expressed in Sibling T21 relative to D21 with an adjusted p-value <0.1
Upstream CAvsCtrl D21 RNA	Figure 2_S1F	Predicted upstream regulators responsible for differential gene expression in D21 cells treated with CA relative to vehicle, using genes with an adjusted p-value <0.1
Upstream CAvsCtrl SibT21 RNA	Figure 2B, Figure 2_S1F, Figure 2_S2D	Predicted upstream regulators responsible for differential gene expression in Sibling T21 cells treated with CA relative to vehicle, using genes with an adjusted p-value <0.1
NonSibT21 Upstream CAvsCtrl	Figure 2_S2D	Predicted upstream regulators responsible for differential gene expression in Non-Sibling T21 cells treated with CA relative to vehicle, using genes with an adjusted p-value <0.1
SibT21 Upstream CAvsCtrl 24hrs	Figure 2_S3C	Predicted upstream regulators responsible for differential gene expression in Sibling T21 cells treated for 24hrs with CA relative to vehicle, using genes with an adjusted p-value <0.1
SibT21 IFNvsCtrl Upstream	Figure 3E	Predicted upstream regulators responsible for differential gene expression in Sibling T21 cells treated with IFN relative to vehicle, using genes with an adjusted p-value <0.1
SibT21 IFN+CAvsIFN Upstream	Figure 3F	Predicted upstream regulators responsible for differential gene expression in Sibling T21 cells treated with IFN and CA relative to IFN, using genes with an adjusted p-value <0.1
Pathway Comparisons RNA	Figure 3_S2E	IPA pathway analysis (using "Diseases & Functions" list) using genes differentially expressed in the labeled comparisons with an adjusted p-value <0.1
D21 IFNvsCtrl Upstream	Figure 3_S2F	Predicted upstream regulators responsible for differential gene expression in D21 cells treated with IFN relative to vehicle, using genes with an adjusted p-value <0.1
D21 IFN+CAvsIFN Upstream	Figure 3_S2G	Predicted upstream regulators responsible for differential gene expression in D21 cells treated with IFN and CA relative to IFN, using genes with an adjusted p-value <0.1
Splicing SibT21vsD21	Figure 5E	IPA pathway analyses (using "Canonical Pathways" list) using genes with differential exon inclusion in Sibling T21 cells compared to D21 for each combination of treatments
Splicing CAvsCtrl	Figure 5F-G	IPA pathway analyses (using "Canonical Pathways" list) using genes with differential exon inclusion in D21 and Sibling T21 cells treated with CA compared to vehicle
Splicing CAIFNvsIFN	Figure 5F-G	IPA pathway analyses (using "Canonical Pathways" list) using genes with differential exon inclusion in D21 and Sibling T21 cells treated with IFN +CA compared to IFN
Splicing IFNvsCtrl	Figure 5_S1H-I	IPA pathway analyses (using "Canonical Pathways" list) using genes with differential exon inclusion in D21 and Sibling T21 cells treated with IFN compared to vehicle
Splicing CAIFNvsCtrl	Figure 5_S1H-I	IPA pathway analyses (using "Canonical Pathways" list) using genes with differential exon inclusion in D21 and Sibling T21 cells treated with IFN +CA compared to vehicle

## Sheet: Upstream SibT21vD21 RNA
Upstream Regulator	Expr Fold Change	Molecule Type	Predicted Activation State	Activation z-score	neg log Pvalue	p-value of overlap	Target Molecules in Dataset	Mechanistic Network
lipopolysaccharide		chemical drug	Activated	12.695	83.8416	1.44e-84	ABCA1,ABCB1,ABCB10,ABCB11,ABCB4,ABCC3,ABCC4,ABCC5,ABCG1,ACAD8,ACE,ACHE,ACKR3,ACO1,ACOT2,ACP5,ACSL1,ACSS2,ACTA2,ACVR1,ACVR2B,ADA,ADAMTS4,ADGRE2,ADM,ADORA2A,ADORA2B,ADRB2,AEN,AFF3,AHNAK,AHR,AICDA,AIF1,AIG1,AIM2,AK4,AKAP13,AKT1,ALCAM,ALDH7A1,ALDOC,ALOX5,ALOX5AP,ALPP,ANGPT2,ANGPTL4,ANKMY2,ANKRD22,ANLN,ANXA1,ANXA2,ANXA5,AOAH,APOBEC3F,APOBEC3G,APOBR,APOC2,APOE,APOL6,APP,AQP3,AR,ARFGAP3,ARHGEF3,ARL15,AR…	2212 (13)
IFNG	20.241	cytokine	Activated	8.577	55.6091	2.46e-56	A2M,ABCA1,ABCA6,ABCB1,ABTB2,ACE,ACO1,ACSS1,ACTA2,ADA2,ADGRG1,ADGRG2,ADM,ADORA2A,ADORA2B,AGPAT1,AGRN,AHCY,AHR,AIF1,AIG1,AIM2,ALDH1L1,ALDH7A1,ALOX5AP,ANGPTL4,APOBEC3G,APOL1,APOL6,APP,AQP9,ARFGAP3,ASS1,ATF3,ATP1B1,AUTS2,B2M,BACH2,BBC3,BCL2,BCL2A1,BCL2L1,BCL2L11,BCL3,BDNF,BDNF-AS,BIRC2,BIRC3,BLNK,BMF,BMP6,BRIP1,BST1,BST2,BTG1,BTN3A1,BUB1B,C15orf48,C1R,C3,C4A/C4B,C5AR1,CALCOCO2,CALHM6,CARD17,CASP1,CAS…	1788 (14)
TNF	-1.614	cytokine	Activated	8.369	74.3706	4.26e-75	A2M,A4GALT,ABCA1,ABCB11,ABCC3,ABCG2,ABTB2,ACADVL,ACE,ACKR2,ACKR3,ACP5,ACSL1,ACTA2,ADAMTS4,ADAMTS7,ADM,ADORA2A,ADORA2B,ADRB1,ADRB2,AEBP1,AGFG2,AICDA,AKAP12,AKR1B1,AKT3,ALCAM,ALOX15B,ALOX5,ALOX5AP,ANGPT2,ANGPTL4,ANK3,ANXA1,APLN,APOC2,APOE,APOL1,APP,AQP3,AQP9,AR,ARF4,ARHGAP18,ARHGAP22,ARHGAP23,ARHGDIB,ARHGEF10,ARHGEF10L,ARHGEF17,ARHGEF34P,ARHGEF40,ARHGEF5,ARID5B,ARRDC3,ASS1,ATF2,ATF3,ATP2B4,AURKC,AX…	2236 (16)
XBP1	2.11	transcription regulator	Activated	8.286	20.8447	1.43e-21	ABCA12,ACACB,AICDA,ALG12,ALG2,APBB2,APP,ARCN1,ARFGAP3,ATF6,BCL2,BET1L,BHLHA15,CALR,COG3,COG6,COPB1,COPB2,COPG1,COPZ1,CREB3,CREB3L1,CXCL2,CXCL8,DAD1,DDIT3,DDOST,DNAJB11,DNAJB2,DNAJB9,DNAJC1,DNAJC3,E2F1,EDEM1,EDEM2,ERLEC1,ERO1B,ERP44,ETS1,FKBP10,FKBP11,FKBP14,FKBP1B,FKBP2,FN1,GALK2,GMPPA,GMPPB,GOLGA3,GOLGA4,GOLGB1,HERPUD1,HM13,HSP90B1,HSPA13,HSPA5,HYOU1,ICAM1,IFNG,IL24,IL6,KDELR2,KDELR3,KLF4,LMAN1,…	1283 (19)
IL1B	5.32	cytokine	Activated	7.984	48.3288	4.69e-49	A2M,A4GALT,ABCB11,ABCC3,ABCG2,ACE,ACHE,ACKR1,ACKR2,ACP3,ACTA2,ADAMTS4,ADM,ADORA2B,ADRB2,AIF1,AKIP1,AKR1B1,AKT3,ALDH7A1,ANGPTL4,ANKH,ANXA1,ANXA4,APOC2,APOE,APOL6,APP,ASB7,ASIC3,ASS1,ATF3,ATF5,B2M,BAMBI,BARD1,BBC3,BCL2,BCL2A1,BCL2L1,BCL2L10,BCL3,BCL6,BDNF-AS,BIRC2,BIRC3,BMF,BMP4,BTG2,C1R,C3,C4A/C4B,CABP1,CASP10,CASP4,CASR,CCL1,CCL2,CCL20,CCL22,CCL3,CCL3L1,CCL3L3,CCL4,CCNA2,CCND1,CCNF,CCNJ,CCR1,CCR2…	2236 (16)
Interferon alpha		group	Activated	7.871	60.7447	1.8e-61	A4GALT,ACP2,ADA2,ADAM19,AIM2,ALDH1B1,ANKRD10,ANKRD6,ANXA1,ANXA2,ANXA5,APOBEC3F,APOBEC3G,APOL1,APOL2,APOL3,AQP3,ATF3,AUTS2,AXL,B2M,BBC3,BCL2,BCL2A1,BCL2L1,BCL2L13,BCL3,BCL6,BCR,BHLHA15,BMP4,BST2,BTG2,C3,CADM1,CASP1,CAV1,CBLB,CCL19,CCL2,CCL22,CCL3,CCNA2,CCNB2,CCND1,CCND2,CCR1,CCR3,CCR5,CCR7,CD1D,CD274,CD38,CD40,CD69,CD72,CD80,CD81,CD83,CD86,CDC20,CDKN1A,CDKN2D,CEACAM1,CGAS,CH25H,CHMP5,CIITA,CISH,CK…	1416 (15)
IRF7	1.683	transcription regulator	Activated	7.732	10.4949	3.2e-11	APOBEC3G,BCL2L1,BCL2L13,CALHM6,CARD16,CASP4,CCL19,CCRL2,CD40,CD69,CD80,CXCL10,CXCL9,FOXP3,FZD1,GBP1,GBP3,GBP4,GBP5,HELZ2,HERC5,IDO1,IFI16,IFI35,IFI44,IFI44L,IFI6,IFIH1,IFIT1,IFIT2,IFIT3,IFITM1,IFITM2,IFITM3,IFNA2,IL12A,IL15,IL15RA,IL1A,IL27,IL6,IRF1,IRF5,IRF7,IRF8,IRF9,ISG15,ISG20,ITGAM,ITGAX,JAK2,MCL1,MX1,MX2,NAMPT,NMI,NT5C3A,OAS1,OAS2,OAS3,OASL,PHF11,PLAC8,PLSCR1,PSME1,RSAD2,RTP4,SAMD9L,SOCS1,S…	1177 (17)
poly rI:rC-RNA		biologic drug	Activated	7.625	24.433	3.69e-25	ABCA1,AFAP1,AGRN,ANXA1,APOBEC3G,APOL1,APOL2,APOL3,APP,ARID5A,ATF3,AUTS2,AXL,B2M,BCL2,BIRC2,BIRC3,BIRC5,BNIP3,BST2,BTLA,BTN3A3,C3,CARS2,CCL2,CCL20,CCL22,CCL3,CCL3L1,CCL3L3,CCL4,CCNA2,CCNB2,CCND2,CCNG1,CCR3,CCR7,CCT5,CCT7,CD200,CD274,CD33,CD36,CD40,CD44,CD69,CD80,CD83,CD86,CDC20,CDCA3,CDH2,CDK1,CDK14,CEACAM1,CEBPB,CEBPD,CENPE,CENPF,CGAS,CHD7,CIITA,CLEC7A,CSF1,CSF2,CSF3,CX3CL1,CXCL10,CXCL2,CXCL3,CXC…	1627 (14)
NFkB (complex)		complex	Activated	7.556	29.1314	7.39e-30	A2M,ABCB1,ABCG1,ACKR3,ADM,ADORA2B,AHR,AICDA,ALDH1B1,ALDH7A1,APOE,APP,ATF3,ATP6AP2,B4GALT1,BAMBI,BBC3,BCL11A,BCL2,BCL2A1,BCL2L1,BCL3,BDNF,BEX2,BIRC2,BIRC3,BIRC5,BLVRA,C1R,C3,CAMK2D,CASP1,CASP4,CBR3,CCL1,CCL2,CCL20,CCL22,CCL3,CCL3L1,CCL3L3,CCL4,CCNB1,CCNB2,CCND1,CCND2,CCNH,CCR2,CCR7,CD274,CD36,CD40,CD44,CD69,CD7,CD80,CD82,CD83,CD86,CD99,CDC25B,CDH22,CDKN1A,CEBPB,CEBPD,CETP,CGREF1,CIITA,CITED4,CLCF1…	2026 (13)
IFNA2	2.133	cytokine	Activated	7.507	32.0996	7.95e-33	ALOX5,ANXA1,APOL6,ATF5,B2M,BAG3,BCL2,BCL2L14,BIRC5,BST2,C1R,C1S,CAV1,CBFB,CCL2,CCL3,CD274,CD28,CD69,CD86,CDKN1A,CDKN2B,CEACAM1,CIITA,CISH,CORO2A,CXCL10,CXCL13,CXCL9,CXCR3,CYB5A,DAD1,DDX60,DNAJB2,DPP4,EFNB3,EGLN3,EIF2AK2,FGF2,GAB3,GBP1,GBP2,GBP4,GEM,H2AC16,HBEGF,HERC5,HERC6,HLA-A,HLA-C,HLA-DRB1,HLA-E,HSH2D,IDO1,IFI16,IFI27,IFI35,IFI44,IFI44L,IFI6,IFIH1,IFIT1,IFIT2,IFIT3,IFIT5,IFITM1,IFITM2,IFITM3,…	1684 (16)
tretinoin		chemical - endogenous mammalian	Activated	7.317	40.3215	4.77e-41	A2M,ABCA1,ABCA12,ABCG1,ABHD2,ABI3BP,ABLIM1,ACACB,ACKR2,ACSL1,ACSS2,ADA,ADAM11,ADAMTS4,ADGRE2,ADM,AFDN,AFF2,AGO4,AHNAK,AHR,AICDA,AKAP12,AKT1,ALOX12B,ALOX5,ANGPTL4,ANXA1,ANXA2,ANXA5,ANXA8/ANXA8L1,APBB1IP,APLN,APOD,APOE,APP,AQP9,AR,ATF3,ATP6V0A4,AURKA,BACH2,BAMBI,BCL2,BCL2A1,BCL2L1,BCL3,BCL6,BCO1,BIRC2,BIRC3,BIRC5,BMP4,BMP6,BMPR2,BNIP3,BNIP3L,BRCA1,BRIX1,BTG1,BTG2,C12orf29,C1S,C3,C5AR1,CA2,CALM1 (in…	1950 (14)
NUPR1	15.884	transcription regulator	Activated	7.249	22.5513	2.81e-23	ABCC5,ABHD15,ACSS1,ACTA2,ACTR3B,ADCY9,ADGRG1,ADM,ADRB2,AEN,AGRN,AKAP12,ALDH5A1,ALDOC,ANGEL1,ANK1,ANK3,ARHGAP11A,AS3MT,ASPM,ATF3,ATP6V0A1,ATP8B1,AURKA,AVPI1,BLM,BNIP3,BRCA1,BTG1,BUB1B,C1orf112,CAMK2N1,CARMIL1,CASTOR2,CCDC134,CCDC9,CCNA2,CCNB2,CCNF,CD68,CDC25C,CDCA2,CDCA3,CDCA8,CEBPB,CENPC,CITED2,CKAP2L,CNIH2,COL1A1,COQ10A,CREB5,CROT,CTPS2,CTU1,CXADR,CXCL3,CXCL8,CXCR4,DAGLA,DDIT3,DDX46,DENND5B,DHTK…	1945 (19)
STAT1	2.171	transcription regulator	Activated	7.124	42.7959	1.6e-43	A2M,ABCA1,ABCB9,ACE,ALPK1,ANGPT2,APOBEC3G,APOC2,APOE,APOL4,APOL6,AXL,B2M,BCL2,BCL2A1,BCL2L1,BCL2L11,BCL6,BIRC5,BST2,BTG1,BTNL9,C1R,C1S,C3,C4A/C4B,CALHM6,CAND2,CASP1,CASP4,CASP6,CBFA2T3,CCL19,CCL2,CCL20,CCL3,CCL3L3,CCL4,CCND1,CCND2,CCNE1,CCR1,CCR2,CCR7,CCRL2,CD274,CD40,CD44,CD86,CDKN1A,CEACAM1,CEBPD,CH25H,CIITA,CLIC5,COL1A1,CREM,CSF2,CSF3R,CTSS,CX3CL1,CX3CR1,CXCL10,CXCL2,CXCL3,CXCL8,CXCL9,CXCR3,CY…	1651 (15)
1,1-diarylethylene-diammonium derivative		chemical reagent	Activated	6.861	22.0155	9.65e-23	AURKA,AURKB,BIRC5,BST2,BTG1,CCL2,CCNA2,CCNB1,CCNB2,CCNE2,CDK1,CDKN1A,CENPA,CENPF,CENPM,DDX60,FOXM1,GTSE1,HELZ2,HERC6,ICAM1,IFI27,IFI35,IFI44,IFIH1,IFIT1,IFIT2,IFIT3,IRF7,IRF9,ISG15,ISG20,NMI,OAS1,OAS2,OAS3,OASL,PARP9,PDE4B,PLK1,SP110,SSPN,ST3GAL5,STAT1,TAP1,TAPBP,TENT5A,TMEM140,TNFAIP3,TRIM5,UBE2L6
IFNL1	4.942	cytokine	Activated	6.762	19.3206	4.78e-20	APOL6,ATF3,BST2,CCR7,CD40,CD80,CD83,CHAC1,CXCL10,CXCL8,CXCL9,DDX60,EIF2AK2,F2R,GBP1,GBP5,HERC5,HERC6,HLA-C,IFI27,IFI35,IFI44,IFI44L,IFI6,IFIH1,IFIT1,IFIT2,IFIT3,IFIT5,IFITM1,IFITM2,IFITM3,IL10,IL12B,IL13,IL6,IRF9,ISG15,ISG20,LAMP3,LGALS3BP,MX1,OAS1,OAS2,OAS3,OASL,PHF11,PLAAT4,PLSCR1,RSAD2,RTP4,SHFL,SLC15A3,SP100,SP110,STAT1,STAT2,TLR2,TMEM140,TRIM14,TRIM22,UBE2L6,USP18,XAF1	1725 (14)
TP53	-1.082	transcription regulator	Activated	6.659	60.8962	1.27e-61	A2M,ABAT,ABCA1,ABCA2,ABCB1,ABCB4,ABCB6,ABCG2,ABHD4,ACACB,ACADVL,ACAT1,ACE,ACER2,ACO1,ACP2,ACSF2,ACSL1,ACSS1,ACSS2,ACTA2,ACTL6A,ACTN1,ADA,ADGRE5,ADORA2B,ADRB2,AEN,AGO2,AHCY,AK4,AKAP12,AKR1B1,AKT1,AKT3,ALDH1B1,ALDOC,ALOX5,AMOTL2,ANK1,ANKH,ANLN,ANXA1,ANXA2,ANXA4,ANXA8/ANXA8L1,APBB2,APOBEC3C,APOE,APOL1,APP,AQP3,AR,ARHGAP5,ARRB1,ARRB2,ARVCF,ASF1B,ASPM,ASS1,ASTN2,ASXL1,ATAD2,ATF3,ATG10,AURKA,AURKB,AXIN…	2148 (20)
NONO	-1.136	transcription regulator	Activated	6.555	19.6882	2.05e-20	ATP10A,BRIP1,CALHM6,CCL4L1/CCL4L2,CD38,CD80,CFAP58-DT,CXCL10,CXCL9,CYP17A1,DDX60,EIF2AK2,EPHB2,EPSTI1,EREG,GBP1,GBP4,GBP5,GCH1,GMPR,HCAR2,HERC5,HERC6,HESX1,HSH2D,IDO1,IFI27,IFI44,IFI44L,IFI6,IFIH1,IFIT1,IFIT2,IFIT3,IFIT5,IFITM1,IFITM2,IKBKE,ISG15,ISG20,LGALS3BP,MORC3,MX1,MX2,NCF1B,NOS3,NT5C3A,NUPR1,OAS1,OAS2,OAS3,OASL,PARP9,PDE1B,PDE1C,PDE2A,PDE3B,PDE4A,PDE4B,PDE4C,PDE8A,PDE8B,PI4K2B,PLSCR1,RNF21…
tetradecanoylphorbol acetate		chemical drug	Activated	6.406	28.2262	5.94e-29	ABCA1,ABCA7,ABCB1,ACE,ACHE,ACO1,ADAM28,ADAMTS4,ADM,ADORA2A,AHSA1,AKT1,ALOX15B,ANGPT2,ANGPTL4,ANXA1,APOBEC3G,APOM,APP,ARF4,ARHGAP32,ARID3B,ATF3,ATP1A3,ATP2B4,AURKA,AURKB,AXL,AZU1,BCL2,BCL2A1,BCL2L1,BCL3,BDNF,BIRC3,BIRC5,BLM,BMP4,BMP6,BNIP3L,BTG2,C3,C3orf52,C5AR1,CA11,CA2,CACNA1B,CAPG,CASP1,CAV1,CBS/LOC102724560,CCL1,CCL2,CCL20,CCL3,CCL3L1,CCL3L3,CCL4,CCNA2,CCND1,CCND2,CCNE1,CCNH,CCR2,CCR3,CCR7,CD2…	2296 (17)
CG		complex	Activated	6.356	31.8297	1.48e-32	ABCB1,ABTB2,ACP3,ACSL1,ACSS2,ACTA2,ADAMTS4,ADM,AMOTL1,ANGPTL4,APLN,APPL2,AR,ARHGAP20,ARHGAP22,ARHGAP6,ARID5B,ARNT,AXIN2,B2M,BAMBI,BARD1,BCL2,BCL2L1,BDNF,BLM,BMP4,BMP6,BMPR2,BRCA1,BTG1,BTG2,BTG3,C1R,C1S,C3orf80,C4A/C4B,CADM1,CASP4,CBFA2T3,CCDC86,CCL2,CCL20,CCNA2,CCND1,CCND2,CCNE2,CD24,CD34,CD93,CDH2,CDK1,CDK19,CDKN1A,CEBPA,CEBPB,CEBPD,CLDN11,CLDN12,CLU,CNN1,CNNM1,CPEB4,CREB1,CREB5,CREM,CSF1,CX3CL1…	2533 (18)
tunicamycin		chemical - endogenous non-mammalian	Activated	6.346	22.6383	2.3e-23	ABCA12,ABCB1,ABCG2,ACTA2,AKT1,ARF4,ARFGAP1,ARFGAP3,ATF3,ATF5,ATF6,AVIL,AXL,BBC3,BET1L,BIK,BIRC2,BIRC3,C1QTNF12,CALR,CAMKK2,CASP12,CASP4,CASR,CCL20,CCND1,CD36,CDKN1A,CEBPB,CEBPD,CHAC1,COL2A1,COL6A1,CREB3L2,CXCL2,CXCL3,DDIT3,DERL3,DNAJB11,DNAJB9,DNAJC3,E2F1,EDEM1,EDEM2,EGFR,EGR1,EIF4EBP1,ERBB3,ERLEC1,ERN1,ERO1B,ETS1,FKBP11,FN1,GADD45A,GADD45B,GNA12,GOLGA3,GOLGA4,GOLGA5,GP1BB,GRN,HAMP,HCN2,HDLBP,HER…	1748 (19)
TLR3	-2.132	transmembrane receptor	Activated	6.261	13.5607	2.75e-14	ABCA1,ADAMTS4,AIM2,AKT3,ARRDC4,ATF3,AUTS2,BFSP2,C3,CCL1,CCL2,CCL20,CCL3,CCL3L3,CCL4,CD274,CD38,CD40,CD69,CD80,CD86,CLU,CSF2,CSF3,CTH,CX3CL1,CXCL10,CXCL2,CXCL3,CXCL8,DEFB4A/DEFB4B,DISC1,DNMT1,DUSP1,EDN1,EIF2AK2,FMR1,FOS,FURIN,GADD45B,GBP2,GBP3,GBP4,GCH1,GDNF,HAMP,HERC5,HGF,ICAM1,ID1,IER3,IFI16,IFI44,IFI44L,IFI6,IFIH1,IFIT1,IFIT2,IFIT3,IFNA2,IFNG,IL10,IL12A,IL12B,IL13,IL15,IL19,IL1A,IL1B,IL1R2,IL1R…	1379 (16)
TLR4	3.343	transmembrane receptor	Activated	6.25	14.857	1.39e-15	ACP3,ADM,ADORA2A,ADORA2B,APP,ARID5A,ATF3,ATF6,BAMBI,BBX,BCL2,BCL2L1,C3,CCL1,CCL2,CCL20,CCL3,CCL3L3,CCL4,CCND2,CCR5,CCR7,CCRL2,CD200,CD200R1,CD274,CD38,CD40,CD44,CD80,CD86,CDK6,CEBPD,CERS2,CERS6,CISH,CITED2,CMA1,CSF2,CSF3,CXCL10,CXCL2,CXCL3,CXCL8,CXCR2,CYP27B1,DDIT3,DEFB4A/DEFB4B,DLL4,DNMT3A,DUSP2,EBI3,EDN1,EFNA1,EREG,FBXO32,FCGR2B,FGL2,FOS,GBP2,GDNF,GPR34,GRK2,HBEGF,HDAC1,HELZ2,HHEX,HLA-DQA1,HMGB…	1817 (14)
TLR9	5.322	transmembrane receptor	Activated	6.217	15.6925	2.03e-16	ABCA1,ADAMTS4,AICDA,AIM2,AKT1,ARRDC4,ATF3,BCL2,BCL2L1,BFSP2,CCL3,CCL3L3,CCL4,CCNA2,CCNB1,CCND1,CCR7,CD27,CD274,CD38,CD40,CD69,CD80,CD83,CD86,CERS6,CISH,CSF1,CSF2,CSF3,CTH,CXCL10,CXCL2,CXCL3,CXCL8,CXCL9,DUSP1,EBI3,EDN1,EGR1,FCER2,FCMR,FURIN,GADD45B,GCH1,GDNF,ICAM1,IDO1,IER3,IFI16,IFI35,IFI44L,IFIT1,IFIT2,IFIT3,IFITM1,IFNA2,IFNG,IL10,IL10RA,IL12A,IL12B,IL17A,IL18,IL19,IL1A,IL1B,IL23A,IL2RA,IL36A,IL…	1592 (14)
BHLHE40	1.028	transcription regulator	Activated	6.202	22.6635	2.17e-23	ACTA2,ACTN1,ADORA2B,AFF3,AHR,AK4,ALDH7A1,ALOX5,ANXA1,ATF3,ATP1B1,AXL,B2M,BCL2L1,BDNF,BHLHE41,BIRC5,BTG1,C15orf48,C1orf21,CALCRL,CAPG,CASP1,CASP4,CAV1,CCR1,CCR7,CCRL2,CD274,CD38,CD69,CD80,CD82,CD86,CD9,CSF2,CSF2RB,CSF3,CSK,CTSS,CXCL3,CXCR5,DCBLD2,DDIT3,EBI3,EGLN3,EOMES,EPSTI1,EREG,EXT1,FCGR2B,FGL2,GARIN1A,GBE1,GBP2,GBP6,GCH1,GDA,GFPT1,GSTM3,GZMK,HAVCR2,HBEGF,HDAC9,HDLBP,HILPDA,HOMER1,HSPA5,ID1,IER…	2107 (18)
TGM2	1.676	enzyme	Activated	6.13	18.6861	2.06e-19	ACSS2,ADGRE2,AFF2,AQP9,BCL2A1,BCL6,BIRC3,BNIP3,BTG2,C12orf29,C3,C5AR1,CA2,CCDC169,CCL2,CCL22,CCL3,CCL4L1/CCL4L2,CCND1,CCRL2,CD36,CD86,CD93,CDCA7,CDK6,CEACAM1,CFP,CSF3,CSRNP1,CX3CR1,CXCL10,CXCL12,CXCL8,CXCR5,DAAM2,DAPK2,DCSTAMP,DDX60,EHD1,EPO,FAM90A1,FN1,GIMAP2,GIMAP6,GM2A,GTPBP10,HIP1,HK3,ICAM3,ID1,IFI35,IFI6,IFIT1,IFIT2,IFIT3,IFIT5,IFNG,IL10RA,IL1B,IL6,IRF9,ITGA6,ITGAM,ITGAX,ITGB3,JAML,KCNQ5,KIA…	1342 (18)
Ifnar		group	Activated	5.884	12.7696	1.7e-13	AIM2,AXL,B2M,C3,CASP1,CCL2,CCL22,CD274,CD40,CD86,CXCL10,DDIT3,EIF2AK2,GBP2,HLA-A,HLA-E,HLA-G,IDO1,IFI16,IFI35,IFIH1,IFIT2,IFIT3,IFITM3,IFNG,IFNGR1,IL10,IL12B,IL15,IL1B,IL6,IRF1,IRF7,IRF8,IRF9,ISG15,ISG20,ITGA4,LGALS3BP,NLRP3,OAS1,OAS2,OASL,PDCD1LG2,RNF213,RNF31,RSAD2,STAT1,STAT2,TAP1,TAPBP,TLR2,TLR3,TLR7,TNF,TNFSF10,UBE2L6,USP18,VCAM1,XAF1,ZBP1	1167 (13)
torkinib		chemical drug	Activated	5.879	11.58	2.63e-12	ACACB,ADGRL2,AHR,AKAP13,ASF1B,ATF3,ATP6V0E2,AURKA,AURKB,BBC3,BCL6,BIRC5,BLM,BRIP1,BTG1,C1R,C1S,CCNB1,CCND1,CCNE2,CCNF,CD44,CDC123,CDCA2,CLSPN,COQ8A,CXCL8,CYP1B1,DNA2,DYRK4,E2F2,EDN1,EDN2,EGR1,EGR2,FANCI,FOSL1,FOXC1,GINS2,GINS3,GMNN,GOLGA2,H2AW,H2AX,HAUS1,HAUS6,HBEGF,ID1,ID3,IL1RN,IL24,IL6R,ITGA2,KIF14,KIF18B,KLF6,KNL1,KPNA2,LIF,MCM10,MCM3,MCM5,MCM6,NABP1,NCAPG,NOTCH1,NUAK1,ORC1,ORC6,PAXX,PDLIM2,P…	2165 (22)
CpG ODN 2006		chemical reagent	Activated	5.874	15.3947	4.03e-16	AICDA,BCL2A1,BCL2L1,BIRC3,CCL2,CD274,CD40,CD80,CD86,CLEC2D,CXCL10,CXCL8,CXCL9,DNAAF1,EPSTI1,FCER2,GBP4,GBP5,GZMB,ICAM1,IFI27,IFI35,IFI44,IFI44L,IFI6,IFIH1,IFIT1,IFIT2,IFIT3,IFIT5,IFNA2,IFNG,IL10,IL12B,IL15RA,IL17A,IL1B,IL23A,IL2RA,IL2RB,IL6,IRF7,IRF9,ISG20,mir-221,MX1,MX2,NFKB2,NFKBIZ,OAS1,OASL,RSAD2,SELL,SLAMF7,SP100,STAT1,TLR4,TLR5,TLR7,TLR9,TNF,TNFAIP6,TNFRSF13B,TNFRSF13C,TNFSF10,TNFSF13B,TNFS…	937 (14)
P38 MAPK		group	Activated	5.873	14.5901	2.57e-15	ABCA1,ANK1,ANXA5,ASS1,ATF2,ATF3,BBC3,BCL2,BCL2A1,BCL2L1,BDNF,BIRC5,BNIP3,BNIP3L,CAV1,CCL2,CCL3L3,CCND1,CCND2,CCNE1,CCNF,CCNG2,CCR7,CD1D,CD36,CD40,CD44,CD55,CD69,CD80,CD82,CD83,CD86,CDKN1A,CEBPA,CEBPB,CEBPD,CSF2,CSF3,CXCL10,CXCL12,CXCL2,CXCL3,CXCL8,CXCL9,CXCR4,CYP19A1,CYP1A1,DDB2,DDIT3,DUSP1,EDN1,EDNRB,EGR1,EGR2,ELK1,FBXO32,FCER2,FDXR,FGF2,FN1,FOS,GBP1,GCLC,GDI1,GOLGA2,HOMER1,HSPA5,ICAM1,ID3,IER3,…	1574 (13)
IL21	1.904	cytokine	Activated	5.839	15.5969	2.53e-16	AICDA,BCL2,BCL2L1,BCL2L11,BCL6,CALHM6,CASP1,CCL20,CCL3L3,CCL4,CCND2,CCR7,CCRL2,CD1D,CD27,CD28,CD38,CD69,CD86,CDKN1A,CLIC5,CSF2,CXCL10,CXCL13,CXCL8,CXCR3,CXCR5,DPP4,EGR1,EIF2AK2,EOMES,FCGR2B,FGL2,FOXP3,GATA3,GBP5,GBP6,GZMB,HAVCR2,HERC6,HLA-DRB5,HSH2D,ID2,IDO1,IFI16,IFIT1,IFIT2,IFIT3,IFNG,IL10,IL12RB2,IL13,IL17A,IL18R1,IL18RAP,IL23A,IL23R,IL2RA,IL2RB,IL4,IL6,IL7R,IRF5,IRF7,ISG15,KLRC1,KLRC4-KLRK1/K…	1650 (14)
IFN Beta		group	Activated	5.819	20.1035	7.88e-21	ACAT1,ANKRD22,ATF3,BCL2,BCL2L1,BST2,BTG2,CASP4,CAV1,CCL2,CCL22,CCL3,CCR7,CD22,CD247,CD274,CD40,CD69,CD80,CD83,CD86,CDKN1A,CEBPB,CEBPD,CGAS,CXCL10,CXCL14,CXCL8,DAG1,DPP4,DUSP1,E2F1,EIF2AK2,ENPEP,EREG,FCRL1,FN1,GAS6,HAAO,HERC5,HERC6,HLA-A,HLA-G,ICAM1,IDO1,IDO2,IFI16,IFI27,IFI35,IFI44,IFI6,IFIH1,IFIT1,IFIT2,IFIT3,IFITM1,IFNG,IFNGR1,IL10,IL12A,IL15,IL15RA,IL17A,IL1A,IL1B,IL1RN,IL24,IL27,IL6,INSIG1,IR…	1093 (14)
hydrogen peroxide		chemical - endogenous mammalian	Activated	5.807	21.5638	2.73e-22	ABCB1,ACE,ACTA2,AEBP1,AEN,AKR1C1/AKR1C2,ALOX5,ANKRA2,ANXA2,APP,AR,ATF2,ATF3,ATF6,ATP6V1A,AURKA,BBC3,BCL2,BCL2A1,BCL2L1,BCL2L10,BCL2L11,BIRC3,BIRC5,BRCA1,BRIP1,BTG2,BUB1B,CASP1,CASP12,CAV1,CCL2,CCL3L3,CCL4,CCNA2,CCNB1,CCND1,CCNF,CCNH,CCR2,CCR5,CD247,CD36,CD55,CD68,CD80,CD81,CD86,CDC20,CDC25C,CDC34,CDK1,CDKN1A,CDKN2C,CHEK1,CKS1B,CLU,CNR1,COL1A1,CREBBP,CSF1,CSF3,CSF3R,CTCF,CTSB,CTSD,CTSS,CXCL3,CXCL8…	2179 (17)
pyridostatin		chemical reagent	Activated	5.798	14.7932	1.61e-15	B2M,BST2,CCRL2,CMTR1,CXCL10,DDX60,EIF2AK2,GBP4,GMPR,HELZ2,HERC6,IFI27,IFI35,IFI44,IFI44L,IFIH1,IFIT1,IFIT2,IFIT3,IFITM1,IFITM2,IFITM3,IL15,IRF1,IRF7,IRF9,ISG15,ISG20,LAMP3,LGALS3BP,MOV10,MX1,NMI,OASL,PARP9,PLSCR1,PSME1,RSAD2,RTP4,SAMD9L,SELL,SP110,STAT2,TAP1,TMEM140,TRIM14,TRIM5,UBA7,UBE2L6,USP18	948 (14)
TLR7	1.847	transmembrane receptor	Activated	5.745	10.1811	6.59e-11	AICDA,ATF3,BANK1,BCL2,BCL2A1,BFSP2,CCL2,CCL20,CCL3,CCL4,CCNB1,CCND1,CCR7,CD1D,CD274,CD38,CD40,CD44,CD69,CD80,CD83,CD86,CDKN1A,CEBPB,CPA4,CREB5,CXCL10,CXCL13,CXCL2,CXCL3,CXCL8,CXCL9,ETS2,ETV4,ETV5,FCMR,FGF2,FOSL1,GCGR,HIVEP2,ICAM1,IDO1,IER3,IFI35,IFI44,IFI44L,IFIT1,IFIT3,IFITM1,IFNA2,IFNG,IL10,IL10RA,IL12A,IL12B,IL13,IL1B,IL1R1,IL23A,IL27,IL6,INPP5D,IRF1,IRF7,IRF9,ISG15,ISG20,ITGAX,JUNB,KCNH1,KCNM…	1179 (15)
ZBTB10	2.833	transcription regulator	Activated	5.682	14.2882	5.15e-15	ANXA1,ARID5A,B2M,BCL2L11,BIRC5,CARD9,CASP4,CCL1,CCL3L3,CCL4,CCL4L1/CCL4L2,CCR7,CD1D,CD274,CD34,CD40,CD80,CD83,CD86,CREB3,CX3CL1,CXCL10,CXCL3,DTX3L,FLT1,GBP3,GBP4,GBP5,GBP6,HLA-E,HLA-G,HPSE,IDO1,IFI16,IFIH1,IFIT1,IFIT2,IFIT3,IFITM2,IFITM3,IL10,IL10RB,IL12A,IL12B,IL15,IL1B,IL1RN,IL23A,IL27,IL2RA,IL32,IL4R,IL6,IRF1,ISG15,ISG20,LGALS9B,LRP1,LRRK2,LTA,LY9,MAP3K14,NLRX1,NOD1,NT5C3A,OAS1,OASL,OPTN,PARP9…	1951 (17)
IL1A	-9.675	cytokine	Activated	5.672	10.6308	2.34e-11	ADAMTS4,ADORA2A,ADORA2B,APOD,APP,ASIC3,ATF3,BCL2,BCL2L1,BCL3,BIRC2,BIRC3,BTN3A3,C3,C4A/C4B,CA2,CCL2,CCL20,CCL3,CCL4,CCR2,CD274,CD40,CD44,CD80,CD83,CD86,CDKN1A,CLEC2D,CSF1,CSF2,CSF3,CXCL10,CXCL12,CXCL2,CXCL3,CXCL8,CYP17A1,CYP1A1,DEFB4A/DEFB4B,DPP4,EPO,F2RL3,FGF2,FGFR1,FOS,FOSL1,GBP1,GCH1,HSD11B1,HSD11B2,HSPG2,ICAM1,IER3,IFNG,IFNGR1,IGF1,IGFBP5,IL10,IL12B,IL13,IL17A,IL18,IL1A,IL1B,IL1R2,IL1RN,IL2RA…	1643 (13)
KLF6	1.87	transcription regulator	Activated	5.664	21.2381	5.78e-22	ACVR1B,ACVRL1,ADM,AHR,ALDOC,ALOX5,ANGPTL4,ANXA5,ARID5B,ATF3,BCL2L1,BCL2L11,BCL3,BCL6,BIRC3,BIRC5,CASP1,CASP4,CCL2,CCL22,CCL3L3,CCR1,CD274,CD38,CD44,CD82,CD83,CD86,CDH2,CDKN1A,CEBPB,CHI3L1,CHPF2,CLCF1,CMKLR1,COL1A1,CSF2RB,CXCL2,CXCL3,CXCL8,CYB5A,CYP1A1,DCBLD2,DOCK4,EGFR,EGR2,EHD1,ENG,ESRRA,ETS2,EXT1,GADD45B,GAPDH,GCH1,GCLC,GLI1,HK3,HSPA5,ICAM1,ID2,IFNG,IL10,IL12A,IL12B,IL15RA,IL17RA,IL1A,IL1B,IL6,…	1500 (13)
l-asparaginase		biologic drug	Activated	5.608	15.1884	6.48e-16	ALDH1L2,ATF5,AURKA,AURKB,BARD1,BIRC5,BTG2,BUB1B,CCNA2,CCNB2,CCNE2,CDC25C,CDC7,CDCA5,CDK1,CDKN1A,CENPA,CENPF,CENPM,CENPS/CENPS-CORT,CHEK1,CLSPN,CYP51A1,DDIT3,DHCR7,ERCC6L,FANCI,GINS2,INCENP,INSIG1,KIF11,KIF15,KIF18B,KIF20B,KIF22,KIF2C,KIF4A,KIFC1,KNL1,LIPG,MAD2L1,MCM2,MCM3,MCM5,MCM6,MIS18BP1,MSMO1,MVD,NCAPG,NCAPH,NDC80,NUF2,NUPR1,ORC1,PKMYT1,PLK1,PLK4,POLE,POLE2,PRIM1,PSAT1,RBL1,RHOC,RMI2,SGO1,SMC…
EIF2AK3	1.105	kinase	Activated	5.6	9.86967	1.35e-10	ANG,ARF4,ARFGAP1,ARFGAP3,ATF3,ATF5,ATF6,BCL2L11,BDNF,BET1L,BIRC2,BIRC3,BTG2,CCL20,CCND1,CD274,CEBPB,CPOX,CYB5R1,DDIT3,DERL3,DLG4,DNAJB9,DNAJC3,EDEM1,EGR1,EIF4EBP1,ERN1,ERO1B,ETS2,FGF2,FOSL1,GADD45A,GCH1,GOLGA4,GOLGA5,HERPUD1,HSPA5,IGF1,IL1B,IL6,JUN,KDELR2,KLF4,LMO4,MTHFR,NAPA,NAPB,NFKB2,NUPR1,PDIA3,PON2,PRDM1,PRKN,RAB33B,RPS6KA2,SEC22B,SEC24D,SEC61A1,SEL1L,SIAH2,SLC1A4,SLC35B1,SPATA5,SQSTM1,STX5,…	1525 (27)
prexasertib		chemical drug	Activated	5.575	12.5086	3.1e-13	ADM,AIM2,ATF3,BCL3,BCL6,BIRC3,BTG2,C3,CDKN1A,CDKN2B,CPEB4,CSRNP1,DDIT3,DHRS2,DUSP1,EGR1,EGR3,FOS,GADD45B,GDF15,ICAM1,IER3,IFIH1,IFIT2,IFIT3,IL1B,INHBE,IRF7,KLF4,LRP1,LY96,MDM2,NFKBIA,NLRP1,OSM,PHLDA2,PLK2,RRM2B,SERPINE1,SGK1,SNAI1,TNF,TNFAIP3,TNFRSF10D,TNFRSF9,TNFSF9,TRAF1,TRIM69,VNN1,ZFP36	1996 (18)
5-O-mycolyl-beta-araf-(1->2)-5-O-mycolyl-alpha-araf-(1->1')-glycerol		chemical - endogenous non-mammalian	Activated	5.518	26.3344	4.63e-27	ACSL1,ADAD2,ADORA2A,AQP9,ATF3,BCL2A1,BCL3,CCL2,CCL20,CCL3L3,CCL4,CCR7,CD1D,CD40,CD44,CD83,CHST2,CHST7,CMKLR1,CX3CR1,CXCL10,CXCL2,CXCL3,CXCL8,CXCL9,CXCR2,CYP19A1,DUSP1,EBI3,EGR2,GPAT3,HBEGF,ICAM1,IDO1,IER3,IFIT1,IFIT2,IFIT3,IFIT5,IL18RAP,IL1A,IL1B,ITGB8,KYNU,LRP12,NAIP,NAMPT,NEU4,NFKB2,NFKBIZ,NLRC3,NT5E,PDE4B,RCAN1,RGS1,RGS16,RND3,SDC4,SERPINB2,SERPINE2,SLAMF7,SLC7A11,SOCS3,SPHK1,STAT4,TNF,TNFAIP3…	1484 (12)
Tnf (family)		group	Activated	5.435	13.5498	2.82e-14	ABCC3,APP,ATF3,BBC3,BCL2,BCL2A1,BCL2L1,BIRC2,BIRC3,BIRC5,CARD16,CAVIN3,CCL1,CCL2,CCL3,CCL4,CCND1,CCR1,CCR5,CCRL2,CD22,CD274,CD4,CD40,CD72,CD86,CSF1,CSTA,CSTB,CX3CL1,CXCL10,CXCL12,CXCL3,CXCL8,CXCL9,CXCR2,CYP1A1,DEFB4A/DEFB4B,DUSP10,EIF2AK2,ENPP2,FBXO32,FCER2,GFI1,GHR,GRM3,HLA-DRB1,HSD11B1,ICAM1,IFNG,IGF1,IKBKE,IL10RA,IL12A,IL12B,IL12RB2,IL1A,IL1B,IL1R1,IL1R2,IL1RL2,IL1RN,IL6,IL6ST,IRAK2,IRAK3,ITGA…	1075 (11)
cisplatin		chemical drug	Activated	5.426	27.9101	1.23e-28	A2M,ABCB1,ABCB10,ABCC3,ABCC4,ABHD4,ACADVL,ACTA2,AGFG2,AKR1C1/AKR1C2,AKT1,ANK1,ANKRD18A,ANXA1,ANXA2,ANXA4,ANXA5,APOBEC3F,AQP3,ARHGEF10L,ASRGL1,ASTN2,ATF3,BAG5,BBC3,BBS9,BCL2,BCL2A1,BCL2L1,BCL2L10,BCL2L11,BCL2L13,BHLHE41,BIRC2,BIRC3,BIRC5,BLOC1S2,BMP4,BNIP3L,BRCA1,BTG2,C3,C4A/C4B,CABYR,CAPN2,CASP1,CASP6,CAV1,CCL1,CCL2,CCNB1,CCND1,CCNG1,CCNG2,CCR1,CCR5,CD44,CD68,CDC14B,CDC25B,CDCP1,CDK1,CDKN1A,CDKN1…	2540 (17)
ATF4	1.049	transcription regulator	Activated	5.418	8.35655	4.4e-09	ABCA1,ABCG2,APOE,ARHGAP23,ARHGAP24,ATF3,ATF5,ATF6,BBC3,BCL11A,BTG1,CALR,CCL2,CD55,CDKN1A,CEBPB,CHAC1,CPOX,CTH,CXCL2,CXCL8,CXCR5,CYP27A1,DDIT3,DDR2,DENND1B,EIF4EBP1,FAM102A,FN1,FUT7,FYN,GADD45A,GCH1,GDF15,GYS1,HERPUD1,HSP90B1,HSPA5,HYOU1,IGFBP2,IGFBP5,IGFBP7,IL6,JAG1,JUN,KLF4,KLF9,LALBA,LAMP3,LGALS3,MCL1,MED13L,MGST1,MID1IP1,MITF,MT2A,NAPA,NAPB,NUPR1,PEG3,PPARG,PRKDC,PRKN,PSAT1,RBPJ,SEL1L,SERPINF1…	1930 (20)
JAK1	2.388	kinase	Activated	5.398	11.3726	4.24e-12	BCL2L11,BCL3,BMF,CCL2,CCL3L3,CD40,CDKN1A,CHI3L1,CSF3,DEFB4A/DEFB4B,EIF2AK2,ENPP2,FOS,HAMP,HLA-A,HLA-C,HLA-F,ICAM1,ID1,IFIT2,IL10,IL19,IL1B,IL4R,IL6,IL6ST,IRF1,IRF7,IRF9,JUNB,LIF,LRG1,MX1,PDGFB,RUNX1,SLC1A3,SMAD7,SNAI1,SOCS3,STAT1,STAT2,STAT3,TAP1,TNF,TNFRSF21,TNS4,USP18,WFDC5	1681 (15)
NFKB1	-1.037	transcription regulator	Activated	5.31	15.9469	1.13e-16	A2M,ABCB1,AGO2,AICDA,AKR1B1,APOE,APP,AR,ARNTL2,ATP6AP2,B2M,BAMBI,BCL2,BCL2A1,BCL2L1,BCL3,BIRC3,BLK,BTG2,CASP4,CASR,CCL19,CCL2,CCL20,CCL22,CCL3,CCL3L3,CCL4,CCND1,CCND2,CD274,CD40,CD44,CD80,CD82,CD83,CD86,CDKN1A,CEBPA,CHI3L1,CIITA,COL1A1,COL2A1,CR2,CREB3,CSF1,CSF2,CSF3,CTCF,CTSB,CX3CL1,CXCL10,CXCL2,CXCL3,CXCL8,CXCL9,CXCR5,DEFB4A/DEFB4B,DLL4,DTX1,DUSP1,E2F1,EBI3,EGFR,EGR1,ELF3,ENPP2,FABP6,FCGRT,FN1,…	1932 (11)
ERN1	1.594	kinase	Activated	5.285	15.9318	1.17e-16	ACTA2,ANG,AP1M2,ARF4,ATF3,CEBPB,CEBPD,COL6A1,CREB3L2,CXCL2,CYP1B1,DDIT3,DERL2,DNAJB11,DNAJB9,DNAJC3,E2F1,EDEM1,EPCAM,ERLEC1,ERO1B,ERP44,ETS1,FKBP11,FN1,GOLGA3,GP1BB,GPT,HDLBP,HOOK1,HSP90B1,HSPA5,IFITM1,IL1B,IL4,IL6,JUN,LAD1,MCL1,MORF4L2,MPZL2,MVD,MYH7,OAS2,OSBP,P3H1,P4HB,PADI4,PDIA3,PDIA5,PPARA,PPARG,PRKDC,PROS1,PVR,SCD,SCN3A,SDF2L1,SEC22B,SEC24D,SEC61A1,SEL1L,SELENOS,SERPINB2,SLC20A1,SLC35B1,SMA…	1675 (23)
ZFTA-RELA		fusion gene/product	Activated	5.24	11.109	7.78e-12	BCL2,BCL2L1,BCL3,BIRC3,BMP2K,CASP4,CCL3L3,CD44,CSF1,CX3CL1,CXCL10,CXCL2,CXCL3,DUSP2,FN1,ICAM1,IL15RA,IL1RN,IL4R,IL6,IRF1,IRF7,L1CAM,LITAF,NFKB2,NFKBIA,PDGFB,S100A6,SDC4,SMAD7,TAP1,TAPBP,TGM2,TNFAIP3,TNIP1
OSM	2.115	cytokine	Activated	5.201	25.0209	9.53e-26	A2M,ABCA1,ABCC3,ABCC4,ABCC5,ABCG1,ACE,ACKR2,ACOT2,ACTA2,ADAMTS4,AHR,AKR1C1/AKR1C2,ANGPT2,ANXA1,ANXA2,AQP9,ARL4A,ARL4C,ARTN,ASAH1,ATF3,ATP2B4,B2M,BAMBI,BCL2,BCL3,C1R,C1S,CADM4,CASK,CASP4,CBX3,CCL2,CCL20,CCND1,CCND2,CCNG2,CD24,CDA,CDC42EP4,CDH2,CDK17,CDKN1A,CEBPA,CEBPD,CH25H,CHD1,CHI3L1,CHI3L2,CISH,CLEC2B,COL1A1,COL2A1,COL6A1,CSF2,CSF3,CXADR,CXCL10,CXCL12,CXCL13,CXCL2,CXCL3,CXCL8,CYP19A1,CYP1B1,DEF…	2064 (15)
IL18	-1.858	cytokine	Activated	5.191	10.821	1.51e-11	ADA2,ADAM19,AQP3,ATF3,BCL2,BCL2L1,BCL6,CCL2,CCL20,CCL3,CCL3L3,CCL4,CCR2,CCR5,CCR7,CCRL2,CD226,CD40,CD44,CD69,CD83,CD86,CSF1,CSF2,CTH,CX3CR1,CXCL10,CXCL12,CXCL3,CXCL8,CXCL9,CYSLTR2,DLG4,EDNRB,ENPP2,FOSL2,GADD45B,GIMAP4,GNA15,GRIN2A,GZMB,GZMH,GZMK,HAVCR2,ICAM1,IDO1,IFNG,IL10,IL12A,IL12RB1,IL12RB2,IL13,IL17A,IL18,IL18BP,IL18R1,IL18RAP,IL1A,IL1B,IL2RA,IL32,IL4,IL6,INPP5D,IRF1,ITGAM,JUN,KLRC4-KLRK1/KL…	1570 (14)
doxorubicin		chemical drug	Activated	5.102	22.4168	3.83e-23	A2M,ABCA3,ABCA7,ABCB1,ABCB4,ABCB9,ABCC3,ABCG2,ACAD11,ADM,ADORA2B,AKT1,ANXA1,ANXA2,APP,AR,ARVCF,ATF3,AURKA,AURKB,BARD1,BBC3,BCL2,BCL2A1,BCL2L1,BCL2L11,BIK,BIRC2,BIRC3,BIRC5,BMP4,BNIP3L,BRCA1,BTG1,BTG2,BUB1B,C4A/C4B,CA2,CAMK2D,CASP1,CCL2,CCNB1,CCNB2,CCND1,CD274,CD40,CD44,CDC25B,CDC25C,CDCP1,CDK1,CDK14,CDKN1A,CDKN3,CENPA,CGREF1,CHCHD6,CHEK1,CHEK2,CHGA,CKAP4,CLU,CREM,CTCF,CTSB,CTSD,CXCL2,CXCL3,CXCL8,…	2212 (20)
IL6	326.247	cytokine	Activated	5.074	37.8268	1.49e-38	A2M,ABCA1,ABCB11,ABCC3,ABCC5,ABCG2,ACER2,ACKR2,ACTA2,ACVR1,ACVRL1,ADAMTS13,ADAMTS4,ADGRE5,ADGRL2,ADM,ADORA2B,AHNAK,AHR,AIM2,AKT1,ANG,ANXA1,APOE,APP,AR,ARL4C,ATF3,AXIN2,BAMBI,BBC3,BCL2,BCL2L1,BCL2L11,BCL3,BCL6,BDNF,BIRC5,BMP6,BST2,BTG2,BUB1B,BUB3,C3,C5AR1,CASP1,CASP4,CCL2,CCL20,CCL3L1,CCL3L3,CCL4,CCNA2,CCNB1,CCNB2,CCND1,CCNE1,CCR1,CCR2,CCR3,CCR5,CCR7,CD163L1,CD274,CD36,CD38,CD40,CD44,CD68,CD80,CD8…	1792 (12)
DDX58	1.138	enzyme	Activated	5.07	15.8827	1.31e-16	ADGRE2,AHNAK,BCL2,BLK,C1S,CARD9,CASP1,CASP4,CCL2,CCL20,CCL22,CCL3,CCL4,CD4,CD83,COLEC12,CSF2,CTSS,CX3CR1,CXCL10,CXCL12,CXCL8,EIF2AK2,FEZ1,GBP3,GEM,HERC5,HLA-A,ICAM1,IDO1,IFI27,IFI35,IFI44,IFIH1,IFIT1,IFIT2,IFIT3,IFITM1,IL11RA,IL12A,IL15RA,IL18,IL1A,IL1B,IL23A,IL4R,IL6,IRAK2,IRF1,IRF7,IRF8,ISG15,ISG20,ITGAM,JAK3,KLF4,LTBP3,MAPK11,MST1R,MX1,NFATC4,NFKB2,NMI,OAS1,OAS3,PLAUR,RSAD2,SERPING1,SOCS1,SOCS…	837 (15)
APP	386.213	other	Activated	5.063	17.8996	1.26e-18	ABCA1,ABCA7,ABCG1,ABCG2,ACHE,ACTA2,ACTG1,ADAM19,ADAMTS4,ADAP1,AIF1,AKT1,ALDOC,ANXA5,AP3B2,APBB1,APH1B,APOE,APP,ARF4,ARL11,ARRDC3,ATP1A3,ATP1B1,ATP6V1A,AXIN2,AXL,BBC3,BCL2,BCL2L1,BCL2L11,BDNF,BIK,BIN1,BMF,BMP4,BMP6,C1QBP,C1R,C1S,C3,C4A/C4B,CALML4,CALR,CAMK2D,CASP1,CCL2,CCL20,CCL3,CCL3L3,CCL4,CCNA2,CCNB1,CCNB2,CCND1,CCND2,CCNE1,CCNG2,CCR5,CD40,CD44,CD5L,CD68,CD69,CD82,CD86,CDH2,CDK1,CDK5R1,CDK6,CDK…	2165 (16)
STING1	3.564	other	Activated	5.037	18.6289	2.35e-19	ADGRE2,BBC3,BCL2,BLK,C15orf48,CARD9,CASP1,CCL2,CCL20,CCL22,CCL3L3,CCL4,CD68,CD83,CD86,CGAS,COLEC12,CSF2,CX3CR1,CXCL10,CXCL2,CXCL3,CXCL8,DDIT3,DDX60,FEZ1,GAS7,GBP4,GBP5,GJA4,GMFG,HLA-A,HSPA5,ICAM1,IDO1,IFI16,IFI27,IFI35,IFI44,IFI44L,IFIT1,IFIT2,IFIT3,IFITM1,IFITM3,IFNA2,IFNG,IL10,IL11RA,IL12A,IL15RA,IL18,IL18R1,IL1A,IL1B,IL23A,IL4R,IL6,IRF5,IRF7,IRF8,IRF9,ISG15,ITGAM,JAK3,KLRD1,LIF,MAPK11,MST1R,MX…	1200 (17)
IL3		cytokine	Activated	5.022	13.0915	8.1e-14	ABCA2,ADA,ADGRE5,ALOX5AP,ARHGDIB,ATF5,BCL2,BCL2L1,BCL2L11,BIRC3,BNIP3L,BTG2,CALR,CAMKK2,CBFB,CCL19,CCL2,CCND1,CCND2,CCNG1,CCR3,CCT5,CD1A,CD247,CD40,CD69,CD80,CD83,CD86,CDKN1A,CEBPZ,CIAPIN1,CISH,CITED2,CLEC11A,CREM,CSF1,CSF1R,CSF2,CSF3,CTTN,CXCL8,CXCL9,CXCR4,DAD1,DDIT3,DOK2,ECH1,EGR1,EGR2,EGR3,EIF2AK2,ELAVL3,F2R,FCER2,FCGR2A,FCGR2B,FGFR1,FGFR4,FOS,FOSL2,FUS,GADD45A,GADD45B,GART,GNA13,GPRIN1,GPX1,H…	1221 (14)
cytokine		group	Activated	4.971	9.80967	1.55e-10	ADAMTS4,ADORA2A,AICDA,ALOX5,ANG,APP,BCL2,BCL2L1,BCL3,BIRC5,BMF,C5AR1,CCL2,CCL22,CCND1,CCNE1,CCR7,CD27,CD4,CD40,CD69,CD80,CD86,CD93,CISH,CLU,CSF1,CSF2,CX3CL1,CXCL3,CXCL8,DDIT3,DUSP1,EDN1,EFNA1,EGR1,FGF2,FOS,FOXP3,ICAM1,IDO1,IFNG,IGFBP2,IL24,IL2RA,IL6,IRF1,ITGA6,JUN,KLRC4-KLRK1/KLRK1,LIF,LIPG,NCR1,NOS1,PDCD1LG2,PLAAT4,PLAT,PLAU,PLAUR,PTHLH,S100A4,SAA2,SERPINE1,SGK1,SOCS1,SOCS2,SOCS3,STAT3,TIMP1,TLR…	1286 (14)
IL2	-1.022	cytokine	Activated	4.959	54.9101	1.23e-55	ABCA1,ABCB4,ACVR1B,ADAM19,ADCY9,AHR,AICDA,ANXA1,APOBEC3G,ARHGAP11A,ARHGAP20,ARHGAP32,ARHGDIA,ARHGEF3,ATF5,AURKA,AUTS2,BBC3,BCL2,BCL2A1,BCL2L1,BCL6,BIRC3,C3,CACNA1E,CACNG3,CAMK2N1,CAPG,CAPN5,CARD9,CASP1,CASP4,CBLB,CCL1,CCL2,CCL22,CCL3,CCL3L1,CCL3L3,CCL4,CCNA2,CCND1,CCND2,CCNE1,CCNE2,CCNF,CCNG1,CCNG2,CCR1,CCR2,CCR3,CCR5,CCR7,CCR8,CCR9,CD160,CD200R1,CD247,CD274,CD28,CD38,CD40,CD44,CD58,CD69,CD80,CD8…	1701 (12)
Salmonella enterica serotype abortus equi lipopolysaccharide		chemical toxicant	Activated	4.95	26.0742	8.43e-27	ACKR3,ADORA2B,ADRB2,ARRDC4,ATP1B1,BIRC3,CCL20,CCL3,CCL3L3,CCL4,CCR7,CCRL2,CD274,CDK1,CDKN2B,CSF2,CSF3,CXCL2,CXCL3,DNAJB4,DTNBP1,DUSP2,EBI3,EDN1,EGR1,EGR3,ELOVL7,EPM2AIP1,EREG,ETS2,FERMT2,FJX1,FLT1,FOSL1,G0S2,GADD45A,GADD45B,GBP1,GBP3,GEM,GJB2,GPRC5A,HECW2,HES1,HES4,HEY1,HOMER1,HS3ST3B1,ICAM4,ID2,IDO1,IFIT2,IL10,IL12B,IL15RA,IL18,IL1A,IL1B,IL23A,IL2RA,IL32,IL36G,IL6,IL7R,IRF1,ISG15,KANK1,KCNJ2,LAM…	2013 (17)
IFN alpha/beta		group	Activated	4.926	7.1798	6.61e-08	ARHGEF10,AXL,BCL2L11,CCL2,CCR2,CCR7,CCRL2,CD40,CD69,CD80,CD83,CD86,CX3CL1,CXCL10,CXCL14,FGL2,GAS7,HLA-A,IDO1,IFI16,IFIT2,IFIT3,IFNG,IL10,IL15,IL15RA,IL27,IL6,IL7,IRF1,IRF7,IRF8,RNF213,RSAD2,SERPINB9,SOCS1,STAT1,STAT2,TLR2,TLR3,TLR5,TLR7,TNFSF10,TNFSF13B,TREM1	1345 (14)
decitabine		chemical drug	Activated	4.905	30.1746	6.69e-31	ABCB1,ABCB10,ABCC3,ABCC4,ABO,ADAM23,ADGRL2,ADRB2,AGRN,AIM2,AKAP12,ALOX5,AMOT,ANGPTL4,ANXA2,APOE,AR,ARHGDIB,ATP7A,B2M,BCL11A,BCL2,BCL2L11,BDNF,BIN1,BIRC3,BMP4,BMP6,BMPR2,BNIP3,BRCA1,BTG1,BTG3,CAB39L,CADM1,CAMSAP3,CAV1,CBFA2T2,CCNA2,CCND1,CCND2,CCNG2,CCR2,CCR3,CCR7,CD226,CD24,CD276,CD40,CD44,CD58,CD86,CD9,CDA,CDCA7,CDH2,CDK1,CDK5R1,CDK6,CDKN1A,CDKN1C,CDKN2B,CDKN2D,CEACAM1,CGREF1,CHFR,CHI3L1,CLU,COL…	2434 (19)
MYD88	1.157	other	Activated	4.904	15.7235	1.89e-16	ABCB1,ACP3,ACSL1,ATF6,AXIN2,BAMBI,BCL3,BCL6,BLM,C3,CASP4,CCL2,CCL3L3,CCL4,CCNE1,CCRL2,CD200,CD200R1,CD274,CD38,CD40,CD44,CD80,CD83,CD86,CDK1,CEBPD,CH25H,CISH,CSF2,CSF3,CXCL10,CXCL12,CXCL13,CXCL2,CXCL3,CXCL8,DCLRE1A,DEFB4A/DEFB4B,DLL4,DNMT3A,DUSP1,EBI3,EDEM2,EDNRB,EGR1,ETS2,FANCB,FBXO32,FOS,FOXO1,FOXP3,GDF15,GZMB,HCK,HLA-A,HSPA5,ICAM1,ICOS,IFIT2,IFNA2,IFNG,IGF1,IGFBP5,IKBKE,IL10,IL12A,IL12B,IL13,I…	1622 (14)
SMARCA4	-1.493	transcription regulator	Activated	4.857	29.0737	8.44e-30	A2M,ABCA1,ABCB1,ABHD2,ACE,ACTA2,ADGRG1,AGMAT,AHNAK,AHR,AIM2,ALDOC,AMOTL2,ANTXR2,APOBEC3G,APOL3,ARHGAP30,ARHGDIB,ARL4C,ARRDC4,ATP2B4,AXIN2,BAMBI,BCL2,BCL2A1,BEND5,BEX5,BIN1,BIRC5,BMP4,BNIP3L,C1orf54,C6orf141,CARD16,CARD17,CASP1,CCDC169,CCDC85B,CCDC9B,CCL2,CCNA2,CCND1,CCND2,CCNE2,CCR1,CCR2,CCR8,CCRL2,CD163L1,CD44,CDH2,CDK20,CDKN1A,CDKN2B,CDKN2D,CEACAM1,CEBPB,CFP,CHEK1,CHEK2,CIITA,CLCF1,CLIC2,COL1A1…	2262 (21)
pembrolizumab		biologic drug	Activated	4.849	8.95468	1.11e-09	B2M,CCL3,CCL3L1,CCL4,CCNB1,CD27,CD274,CD276,CD4,CD83,CDK1,CMKLR1,CXCL9,E2F1,FOXP3,GZMB,HAMP,HAVCR2,HLA-A,HLA-DQA1,HLA-E,IDO1,IFIT1,IL1B,IRF1,LAG3,MKI67,OAS1,PDCD1,PDCD1LG2,STAT1,TIGIT	810 (10)
HIF1A	1.212	transcription regulator	Activated	4.746	25.3625	4.34e-26	ABCB1,ACE,ACO1,ACTA2,ACTL6A,ADM,ADORA2B,AHR,AK4,AKAP12,AKT1,ALDOC,ALOX5AP,ANGPTL4,APLN,APOE,AQP9,ATP7A,AURKA,AXIN2,AXL,BACH2,BCL2,BCL2L1,BCL6B,BCS1L,BHLHE41,BIRC2,BIRC5,BNIP3,BNIP3L,BRCA1,CAV1,CAVIN1,CCL2,CCL22,CCL3L3,CCL4,CCND1,CCR2,CCR5,CCR7,CCRL2,CD24,CD274,CD36,CD44,CD69,CDCP1,CDH2,CDKN1A,CITED2,CORO1A,COX4I2,CSF1,CSF2,CTSD,CXCL10,CXCL12,CXCL2,CXCL3,CXCL8,CXCR4,CYB5A,CYP1A1,CYP2S1,D2HGDH,DLL4…	1749 (12)
IFNB1	6.432	cytokine	Activated	4.739	17.6819	2.08e-18	ANXA5,APOL1,APOL2,APOL3,APOL6,AXL,BCL2,BCL2L1,BST2,BTN3A3,CAPN2,CASP1,CCL2,CCL3,CCL4,CCR5,CD274,CD38,CD40,CD80,CD83,CD86,CDH2,CDK10,CDKN1A,CH25H,CREM,CSF2,CX3CL1,CXCL10,CXCL2,CXCL3,CXCL8,CXCL9,CYP1A1,E2F1,EBI3,EIF2AK2,F2R,FGF2,FOS,GBP1,GBP2,GBP3,GBP4,GBP5,GBP6,GLIS2,GPC4,GZMH,HERC5,HLA-A,HMGB2,ICOSLG/LOC102723996,IDO1,IFI16,IFI27,IFI6,IFIH1,IFIT1,IFIT2,IFIT3,IFITM1,IFNG,IFNGR1,IL10,IL12A,IL12B,IL…	1421 (14)
methyl methanesulfonate		chemical toxicant	Activated	4.728	9.32883	4.69e-10	ARFGAP3,ATF3,BTG1,BTG2,CCNG1,CDKN1A,CRELD2,CTSD,DDB2,DDIT3,DESI2,DNMT1,EGR1,EIF1,GADD45A,GADD45B,HERPUD1,HSPA5,ISG20,JUN,KLF4,LIF,MANF,MCL1,MDM2,NMI,NUPR1,PHLDA3,PLXNB2,POU2F1,SNAI1,ST14,SYVN1,TNFRSF10C,TNFSF9,TRIM22,VIM,XPC	2268 (20)
IL12 (complex)		complex	Activated	4.719	14.3019	4.99e-15	AHR,BCL2L1,BCL3,CASP1,CCL1,CCL19,CCL2,CCL20,CCL22,CCL3,CCL4,CCR2,CCR5,CCR7,CD226,CD28,CD44,CD69,CD86,CEACAM1,CISH,CSF1,CSF2,CXCL10,CXCL8,CXCR3,CYTIP,DDB2,EBI3,EOMES,FGF2,FOS,FOXP3,FURIN,FUT7,GADD45B,GATA3,GLG1,GPT,GZMB,HAVCR2,ICAM1,ICOS,IDO1,IDO2,IFIH1,IFIT2,IFNG,IFNGR1,IL10,IL12A,IL12B,IL12RB1,IL12RB2,IL13,IL15,IL17A,IL18,IL18BP,IL18R1,IL18RAP,IL1B,IL27,IL2RA,IL32,IL4,IL6,IL7R,IRF1,IRF8,ISG15,IS…	1684 (15)
IL33	-1.023	cytokine	Activated	4.687	36.8153	1.53e-37	ABCA1,ABCG1,ACAT1,ADORA2B,APOE,APOLD1,APP,ARFGAP3,ARHGAP30,ARHGAP9,ARRB1,ATP10A,ATP8B4,AXL,BCL2A1,BCL2L1,BCL2L11,BCL3,BIRC3,BNIP3,CAMKK2,CASP1,CCL1,CCL2,CCL22,CCL3,CCL3L3,CCL4,CCND1,CCR1,CCR2,CD200R1,CD28,CD36,CD40,CD69,CD72,CD80,CD82,CD83,CD86,CDC5L,CDK5R1,CDKN3,CHST11,CISH,CLEC4A,CLEC7A,CREM,CSF2,CSF2RB,CSF3R,CSTB,CX3CL1,CXCL10,CXCL2,CXCL3,CXCL8,CXCR2,DEFB4A/DEFB4B,DUSP2,EBI3,EEF1E1,EGLN3,EGR2,…	1787 (15)
CDKN2A	-1.047	transcription regulator	Activated	4.658	24.4584	3.48e-25	A2M,ACTA2,APPL2,ASF1B,ASS1,ATAD2,AURKB,BACH2,BARD1,BBC3,BCL11A,BCL11B,BCL2,BCL2L11,BIRC5,BLM,BTG2,BTG3,BUB1B,C3,CAPG,CCL1,CCL19,CCL2,CCL22,CCL3L3,CCL4,CCNA2,CCNB1,CCND1,CCNE1,CCNG1,CCR7,CCR8,CCR9,CD274,CDC25B,CDC25C,CDCA4,CDCA5,CDK1,CDKN1A,CDKN2B,CDKN2C,CDKN2D,CEBPB,CEBPD,CHAF1A,CITED2,CNOT6L,COL1A1,CPA4,CSF1,CTH,CX3CL1,CXCL10,CXCL13,CXCL14,CXCR2,CXCR5,DCK,DCTN4,DDR1,DHFR,DUSP1,E2F1,E2F2,E2F3,EBF…	1946 (20)
CD3		complex	Activated	4.631	24.3098	4.9e-25	ACP3,ACTG2,AHR,ANG,ANXA1,AQP3,ARHGDIB,ATF2,AZU1,BAMBI,BCL2,BCL2A1,BCL2L1,BCL2L11,BCL6,BIRC3,BIRC5,BST2,BTG1,C1R,CALM1 (includes others),CASP6,CCL1,CCL20,CCL22,CCL3,CCL3L1,CCL3L3,CCL4,CCND1,CCND2,CCNE1,CCNH,CCR1,CCR2,CCR5,CCR9,CD226,CD247,CD27,CD274,CD28,CD4,CD44,CD69,CD80,CD83,CD86,CDK1,CDK6,CEACAM1,CENPF,CH25H,CISH,CKS1B,CKS2,CLCN1,COPB2,CORO1A,CORT,CREM,CSF2,CSTF2,CXCL10,CXCL8,CXCR3,CXCR4,DAD1,…	1820 (15)
CSF		group	Activated	4.629	11.3261	4.72e-12	APP,BCL2A1,C3,CARD16,CCL3,CCL4,CCR1,CCRL2,CD22,CD274,CSTA,CSTB,CXCR2,DUSP10,FCER2,HLA-DRB1,IL10RA,IL1A,IL1B,IL1R2,IL1RL2,IL1RN,IL6ST,IRAK2,IRAK3,MCL1,PPARG,SERPINB8,SERPINB9,SERPINE1,SOCS3,SPINT2,SPN,TGM2,TNF,TNFAIP3,TNFAIP6,TNFRSF14,TNFRSF9,TNIP1,TRAF1,WFDC5
RELA	-1.023	transcription regulator	Activated	4.597	20.6308	2.34e-21	A2M,ABCB1,ABCG2,ACTA2,AHR,ALCAM,ALOX5AP,ALPK2,APOE,APP,AR,ARFGAP3,ARHGDIB,ATP6AP2,B2M,BACH2,BBC3,BCL2,BCL2A1,BCL2L1,BCL2L11,BCL3,BEX2,BIRC2,BIRC3,BIRC5,BLVRA,BNIP3L,BTG2,C3,CASR,CAV1,CBS/LOC102724560,CCL19,CCL2,CCL20,CCL22,CCL3,CCND1,CCR7,CD274,CD28,CD40,CD44,CD69,CD80,CDKN1A,CEBPB,CEMIP2,CHI3L1,CIITA,CITED2,COL1A1,COL2A1,CR2,CSF2,CTCF,CTSB,CTTN,CX3CL1,CXCL10,CXCL2,CXCL3,CXCL8,CXCL9,CXCR4,CYP17A1…	1604 (12)
E. coli B5 lipopolysaccharide		chemical - endogenous non-mammalian	Activated	4.587	15.9666	1.08e-16	ACKR1,ACKR3,ADORA2B,ADRB2,B2M,BCL3,BCL6,BIRC2,BIRC3,CCL1,CCL19,CCL2,CCL20,CCL22,CCL25,CCL3L3,CCL4,CCND1,CCR1,CCR5,CCR7,CCR8,CCR9,CD274,CD40,CD44,CD69,CD83,CD86,CDK6,CDKN1A,CEBPA,CHFR,CLDN14,CSF2,CSF3,CSF3R,CX3CL1,CX3CR1,CXCL10,CXCL13,CXCL2,CXCL3,CXCL8,CXCR2,CXCR3,CXCR4,DNAJB2,DUSP1,EGFR,ERRFI1,ETS2,FOS,FOXP3,GBP2,GCLC,GCLM,GNMT,GPX1,HLA-A,HSD11B1,ICAM1,ICOSLG/LOC102723996,IDO1,IFIT1,IFNG,IL10,IL1…	1618 (13)
salmonella minnesota R595 lipopolysaccharides		chemical - endogenous non-mammalian	Activated	4.541	13.2041	6.25e-14	ACSL1,AXL,BCL3,C8orf44-SGK3/SGK3,CASP4,CCL2,CCL20,CCL22,CCL3L3,CCL4,CCRL2,CD38,CD80,CD83,CD86,CEBPD,CH25H,CXCL10,CXCL13,CXCL2,CXCL3,CXCL8,CXCL9,EDNRB,EGR1,ETS2,FOS,FOSL1,GDF15,HLA-DQA1,ICAM1,IFIT2,IFNG,IKBKE,IL10,IL12A,IL12B,IL1A,IL1B,IL6,IRF1,IRF8,ISG15,ITPR2,JAG1,JUN,JUNB,LPAR1,MCM2,MKI67,MT1X,NFKB2,NFKBIA,NFKBIZ,OASL,PDE4B,PILRA,PSTPIP2,PTPRJ,RSAD2,SERPINB2,SERPINE1,SLC7A2,SLFN12L,SLFN13,SLFN5…	1787 (13)
SPI1	-1.478	transcription regulator	Activated	4.538	10.9281	1.18e-11	ACTA2,BCL11A,BCL6,BCL7A,BLNK,CCL22,CCL3,CCL4,CCNA2,CCNB1,CCNB2,CCND1,CCND2,CCNE2,CCR7,CD180,CD1D,CD68,CD72,CDK1,CDK6,CDKN1A,CEBPA,CHI3L1,CIITA,CSF1,CSF1R,CSF2RB,CSF3R,CTSS,CXCL10,CXCL14,DCSTAMP,E2F1,E2F2,EBF1,EGR2,EPB41L2,ETS2,EVI5,FCGR2B,FCGRT,FES,FLI1,FOS,FOXO1,FUT7,GFI1,GPX1,HELZ2,HES1,HIC1,HK3,HOTAIRM1,HSPA8,ID2,ID3,IFI27,IFI44,IFI44L,IFI6,IFIT1,IFIT2,IFIT3,IFITM1,IFITM3,IKZF1,IL10,IL12A,IL12…	1695 (13)
IFNA1/IFNA13	10.779	cytokine	Activated	4.513	7.93554	1.16e-08	AR,CD274,CD40,CD69,CD80,CD83,CD86,CXCL10,CXCL9,CYP1A1,EIF2AK2,GEM,IFI27,IFI6,IFIH1,IFIT1,IFIT2,IFITM1,IFNG,IL1B,IRF1,IRF7,ISG15,MX1,OAS1,OAS2,PLAAT4,PLSCR1,RSAD2,SOCS1,STAT1,STAT2,STAT4,TLR3,UBE2L6,ZBP1	1661 (16)
MAVS	-1.233	other	Activated	4.51	11.1349	7.33e-12	ADGRE2,BCL2,BLK,C1S,CARD9,CASP1,CCL20,CCL22,CD83,CGAS,COLEC12,CX3CR1,CXCL10,CXCL12,CXCL2,CXCL8,HERPUD1,HLA-A,ICAM1,IDO1,IFI27,IFIH1,IFIT1,IFIT2,IFIT3,IFITM1,IFITM3,IFNG,IL11RA,IL12A,IL12B,IL15RA,IL18,IL18R1,IL1A,IL1B,IL23A,IL6,IRAK2,IRF7,IRF8,ISG15,ISG20,JAK3,MAPK11,MERTK,MST1R,MSX1,MX1,NFKB2,NT5C3A,OAS1,OAS2,OAS3,OASL,PLAUR,POU5F1,RSAD2,SERPING1,SOCS1,SOCS3,SOX2,STAT1,STAT2,TBX21,THBS1,TLR7,TNF,…	901 (14)
TICAM1	1.057	other	Activated	4.509	10.0004	9.99e-11	ACSL1,BCL3,CASP4,CCL2,CCL3L3,CCL4,CCRL2,CD38,CD40,CD80,CD86,CEBPD,CH25H,CXCL10,CXCL13,CXCL2,CXCL3,CXCL8,DUSP1,EDNRB,EGR1,ETS2,GDF15,ICAM1,ICOSLG/LOC102723996,IFI16,IFIT1,IFIT2,IFIT3,IFNA2,IFNG,IKBKE,IL10,IL12A,IL12B,IL15,IL15RA,IL17A,IL18,IL18BP,IL1A,IL1B,IL23A,IL4,IL6,IRF1,IRF7,ISG15,ISG20,ITPR2,JAG1,LPAR1,MCM2,MKI67,NFKB2,NFKBIA,NFKBIZ,OASL,PDE4B,PILRA,PSTPIP2,RHOB,RSAD2,SERPINE1,SLC7A2,SOCS1,S…	1142 (16)
SENP3	-1.058	peptidase	Activated	4.494	8.1707	6.75e-09	CCL25,CCL3L3,CCL4,CCR9,CD4,CD80,CD86,CXCL10,CYTH1,EIF2AK2,HLA-A,IFI44,IFIT2,IFIT3,IL12A,IL12B,IL15,IL2RA,IRF7,ISG15,ISG20,OAS2,OASL,RSAD2,SP110,STAT1,TAP1,TNFSF10,TYMP,WARS1,XAF1	1693 (16)
CHUK	-1.084	kinase	Activated	4.477	11.8894	1.29e-12	ACKR3,AEBP1,ATF3,BCL2L1,C3,CASP4,CCL19,CCL2,CCL22,CCL3L3,CCL4,CCNB1,CCND1,CCR1,CDKN1A,CEBPB,CEBPD,CH25H,CHST4,CLDN23,CLU,COL18A1,CSF1,CSF2,CTSB,CX3CL1,CXCL10,CXCL12,CXCL13,CXCL2,CXCL3,CXCL8,CYP7B1,DNMT1,E2F1,ENPP2,EREG,FOS,GADD45B,GBP2,GBP3,GBP4,GCH1,GM2A,GRIN2A,GRN,HAMP,HES6,HEY1,HLA-A,HSP90AA1,ICAM1,IFI16,IFI35,IFIT2,IFNG,IL10,IL12B,IL13,IL17A,IL1A,IL1B,IL1RN,IL23A,IL4,IL6,ISG15,ITGB3,ITM2B,JUN…	1738 (12)
IL15	1.372	cytokine	Activated	4.452	29.7825	1.65e-30	ACTG2,AHR,AKT1,ALDOC,ANXA1,AQP3,ARHGDIB,ARNT,AZU1,BAMBI,BBC3,BCL2,BCL2L1,BCL2L11,BPGM,BTG1,CALM1 (includes others),CAMK2D,CBLB,CCL19,CCL2,CCL3,CCL3L3,CCL4,CCND1,CCND2,CCR1,CCR2,CCR9,CD160,CD226,CD274,CD28,CD33,CD38,CD40,CD44,CD55,CD69,CD80,CD83,CD86,CDK6,CDKN1A,CDKN2B,CEACAM1,CEBPB,CISH,CKS1B,CKS2,CMKLR1,COPB2,CORO1A,CREBBP,CSF1,CSF2,CSF3,CX3CR1,CXCL10,CXCL12,CXCL2,CXCL3,CXCL8,CXCR4,CYP27B1,DARS2…	1784 (14)
IKBKB	-1.003	kinase	Activated	4.452	16.3045	4.96e-17	ABCA1,ACTA2,AEBP1,AR,ATF3,AURKB,BCL2,BCL2L1,BIRC2,BIRC3,BRCA1,C3,CBLB,CCL1,CCL19,CCL2,CCL20,CCL25,CCL3,CCL3L3,CCL4,CCNA2,CCNB1,CCNB2,CCND1,CCNE2,CCR1,CCR3,CCR7,CD44,CDC25B,CDKN1A,CEBPB,CEBPD,CH25H,CKS1B,CLU,COL1A1,CSF1,CSF1R,CSF2,CTSB,CX3CL1,CXCL10,CXCL12,CXCL2,CXCL3,CXCL8,CXCR4,CYP1B1,CYP7B1,ECT2,EDN1,EGR1,ENPP2,EREG,ETS1,FOS,FOXM1,FOXO1,FSCN1,FYN,GADD45A,GBP2,GBP3,GCH1,GLI1,GM2A,GNRH1,GRK5,GRN,…	1939 (14)
IL5	-1.023	cytokine	Activated	4.435	23.1798	6.61e-24	A2M,ACP5,AICDA,ALDOC,ANXA2,ASS1,ATP1B1,BCL2,BCL2L1,BCL3,BCL6,BIRC2,BNIP3,BNIP3L,CA4,CASP4,CCL2,CCL22,CCL3,CCND2,CCNE1,CCNH,CCR1,CCR2,CCR3,CCR5,CCR7,CCR9,CCRL2,CD24,CD40,CD55,CD69,CD80,CD9,CDC123,CDKN1A,CEACAM1,CHST12,CIITA,CISH,CITED2,CKAP4,CLEC2B,CRELD2,CRIP1,CSF2,CSF2RB,CSF3R,CX3CR1,CXCL8,CXCR2,CXCR3,CXCR4,CYSLTR1,DUSP5,EAF2,EGLN3,EGR1,EGR2,EGR3,EIF4EBP1,ELL2,ENDOG,EPOR,EPS8,FAM162A,FCGR2B,FGL2…	2068 (13)
thapsigargin		chemical toxicant	Activated	4.404	21.6234	2.38e-22	ABCA12,ABCB1,ABCG2,ADCY1,AR,ATF3,ATF5,ATF6,BBC3,BCL2L1,BCL6,BDNF,BIK,BIRC2,BIRC3,C5AR1,CALR,CAPN5,CASP12,CAV1,CCL20,CCL3L3,CCND1,CCNG2,CD80,CD83,CD86,CDA,CDKN1A,CEBPA,CEBPB,CHAC1,CLU,COL18A1,COL1A1,COL2A1,CREB3L1,CREB3L2,CREM,CSK,CXCL10,CXCL2,CXCL3,CXCL8,DDIT3,DERL2,DNAJB9,EDEM1,EGR1,EGR2,EIF1,EIF4E,EIF4EBP1,ERBB2,ERLEC1,ERN1,ERO1B,ERRFI1,ETS1,EVI2A,FN1,FOS,GADD45A,GADD45B,GDF15,HAMP,HERPUD1,HPSE…	1807 (17)
TCF3	-1.749	transcription regulator	Activated	4.394	35.1662	6.82e-36	ABCC12,ACACB,ADA,AFDN,AICDA,ALCAM,ANLN,AP3D1,ARHGAP4,ARSA,ASF1B,ATF3,AURKA,AXIN2,BACH2,BCL2L11,BCL6,BHLHA15,BIK,BIRC5,BLNK,CA2,CASP6,CBFA2T3,CCNA2,CCNB1,CCNB2,CCND2,CCNE1,CCNE2,CCR2,CCR8,CCR9,CCS,CD200R1,CD4,CD55,CD93,CDC20,CDC25B,CDCA3,CDK1,CDK20,CDK6,CDKN1A,CDKN2B,CDKN2C,CDKN3,CEP55,CGREF1,CIP2A,CKAP4,CKS2,COL1A1,CPT1B,CR2,CREB3L2,CRELD2,CSF1R,DCK,DTX1,DUT,E2F8,EAF2,EBF1,ECT2,EDEM1,EIF4EBP1,EPC…	1918 (21)
IKBKG	-1.106	kinase	Activated	4.392	8.11126	7.74e-09	AEBP1,BBC3,BIRC3,C3,CCL20,CCR1,CD247,CEBPB,CEBPD,CH25H,CLDN23,CLU,CSF1,CSF2,CTSB,CX3CL1,CXCL10,CXCL12,CXCL2,CXCL3,CXCL8,CYP7B1,ENPP2,EREG,FCER2,FOS,GBP2,GBP3,GCH1,GM2A,GPT,GRN,HLA-A,ICAM1,IFI16,IKBKE,IL1A,IL1B,IL1RN,IL6,IRF7,ISG15,JUNB,KCND2,MYH6,MYH7,NFKB2,NFKBIA,NR6A1,PAX8,PLD3,PPARA,PPARG,RCAN1,RGS16,SERPINB2,SERPINE2,SFRP1,SGK1,SLC5A5,SOCS3,TG,TNF,TNFAIP2,TNFAIP3,TNFRSF1B,TNFSF10,TRPC1,VEGFA	1863 (13)
MAP2K1	1.192	kinase	Activated	4.387	9.20204	6.28e-10	ABCB1,ACTA2,ADGRG1,AHR,ALDH1L1,APOBEC3G,APOE,ATF3,AXIN2,BCL2,BCL2A1,BCL2L1,BCL2L11,BIRC2,BIRC3,BRCA1,CCL2,CCL3L3,CCL4,CCNA2,CCND1,CD274,CD44,CDKN1A,CDKN2B,CEBPA,COL1A1,CRIM1,CSF2,CSTA,CTSB,CXCL3,CXCL8,CYP17A1,DNMT1,DPP4,DUSP1,DUSP5,E2F1,EGR2,ELK1,ETV5,F2R,FGF2,FOS,FOSL1,FURIN,GRIN1,HSPA5,IL1A,IL6,IRS1,ITGA5,ITGB1,ITGB3,ITPR1,IVL,JUN,JUP,LEF1,LGALS3,MITF,MOG,MZF1,NET1,NFKBIA,NOS1,NOX5,OSM,PDGFRA,P…	1931 (18)
STAT4	3.833	transcription regulator	Activated	4.33	13.9136	1.22e-14	ACP6,ACSS1,ACVRL1,ADSS2,AHNAK,ALDOC,ARFGAP3,ARMCX1,ASPH,ATP7A,BCL2,BCL2L1,BCL2L11,BCL3,C3,CAPN5,CCL2,CCR5,COPG1,CXCL10,CXCL2,CXCL3,DAP,DAPK2,DDAH2,DNAJB6,EPOR,ERRFI1,ETV5,FSCN1,FURIN,FYB1,GATA3,GBE1,GLG1,H3-3A/H3-3B,HES6,HILPDA,HLA-DQB1,IER3,IFIH1,IFIT2,IFNG,IL10,IL10RA,IL12RB1,IL12RB2,IL13,IL17A,IL18R1,IL18RAP,IL2RA,IL6,INSL3,IRF1,ISG15,ISG20,ITGA7,JAG2,KDELR2,KDM6B,KLF9,KRT18,LAMTOR3,LRP1,LRRFI…	1441 (14)
TGFB1	1.22	growth factor	Activated	4.329	61.4737	3.36e-62	AASS,ABCA1,ABCD1,ABCG1,ABCG2,ACE,ACKR1,ACKR2,ACP3,ACSM3,ACSS1,ACSS2,ACTA2,ACTG2,ACTN1,ACVR1,ACVRL1,ADAM19,ADAMTS12,ADAMTS4,ADCY9,ADGRG2,ADM,ADORA2B,ADRA1D,AHNAK,AHR,AIM2,AKR1C1/AKR1C2,AKT1,AKT3,ALDH5A1,ALOX5,ALOX5AP,ALPP,AMOTL2,ANGPTL4,ANKH,ANXA2,ANXA8/ANXA8L1,AOPEP,AP3S1,APLN,APOC2,APOE,APP,AQP9,ARF4,ARHGAP19,ARHGAP22,ARHGAP24,ARHGDIA,ARHGEF19,ARID5B,ARL4A,ASPM,ASS1,ATF3,ATF6,ATP1B1,AURKA,AUTS2,…	2882 (18)
8-bromo-cAMP		chemical reagent	Activated	4.327	29.3915	4.06e-30	ABCA1,ACE,ACP5,ACTG1,ADCY1,ADCY4,ADM,ADRB2,AKT3,ALG2,AP3B2,APP,ARSA,ARSB,ARSG,ASAH1,ASS1,B4GALT1,BBC3,BCL2L1,BIRC3,BIRC5,BMP4,BMPR2,BUB1B,CAPN2,CAV1,CCNA2,CCNB1,CCNB2,CCND1,CCND2,CCNE2,CCNG2,CD68,CD82,CDC20,CDC25B,CDC25C,CDK1,CDK6,CDKN1A,CDKN1C,CDKN2B,CEBPA,CEBPB,CKB,CLDN11,CLEC11A,CLU,COL4A4,COL4A6,CREB1,CREM,CSF2RB,CSF3R,CTSB,CTSD,CYP17A1,CYP19A1,CYP1B1,DDB2,DDOST,DIAPH1,DLL4,DMRT1,DUSP1,E2F1,E…	2762 (21)
pidnarulex		chemical drug	Activated	4.316	8.82391	1.5e-09	ANGPTL4,APOBEC3H,ASS1,BTG2,CCNG2,CDKN1A,CPEB4,DDB2,GADD45A,GSTT2/GSTT2B,IER3,MDM2,PLK2,POLH,RPS27L,RRM2B,SESN1,SESN2,STING1,TIGAR,TNFRSF10C,TNFRSF10D,TP53I3,TRIM22,XPC,ZMAT3	992 (7)
adavosertib		chemical drug	Activated	4.309	18.2083	6.19e-19	ADGRE2,AURKA,BCL2,BLK,C1S,CARD9,CASP1,CCL20,CCL22,CD83,COLEC12,CTSS,CX3CR1,CXCL10,CXCL12,CXCL8,FEZ1,FOXM1,HLA-A,ICAM1,IDO1,IFI27,IFI35,IFIH1,IFIT1,IFIT2,IFITM1,IL10,IL10RB,IL11RA,IL12A,IL15RA,IL18,IL18R1,IL1A,IL23A,IL4R,IL6,IRAK2,IRF1,IRF5,IRF7,IRF8,IRF9,ISG15,ISG20,ITGAM,JAK3,MAPK11,MERTK,MST1R,MX1,NFKB2,OAS1,OAS3,OASL,PLAUR,RRM2,SERPING1,STAT1,TBX21,THBS1,TLR5,TNF,TNFAIP3,TNFRSF11B,TNFRSF18,TNF…	1830 (19)
TCR		complex	Activated	4.299	24.7799	1.66e-25	ABCD1,ABLIM1,ADM,ADORA2A,AIM2,AKT3,APOD,APOE,BACH2,BCL2,BCL2A1,BCL2L1,BCL2L11,BCL3,BIN1,BIRC3,BTLA,CBLB,CCL1,CCL22,CCL3,CCL3L3,CCL4,CCND1,CCNE1,CCR1,CCR2,CCR3,CCR5,CCR7,CCR8,CCR9,CD200,CD27,CD28,CD38,CD4,CD44,CD6,CD69,CISH,CREB1,CSF2,CTSB,CXCL10,CXCL13,CXCL8,CXCL9,CXCR3,CXCR4,CXCR5,CYTIP,DKC1,ECH1,EGR1,EGR2,EIF4E,ELL2,EOMES,ETV5,F5,FOS,FOXP3,FYN,GADD45B,GATA3,GBP4,GFI1,GNPDA1,GRIA3,GZMB,HADH,HERC…	1799 (15)
IFNE	-1.992	cytokine	Activated	4.298	9.31336	4.86e-10	APOBEC3G,BST2,CD40,CD80,CD83,CD86,CDKN1A,CXCL10,CXCL9,EIF4E,HERC5,HSD11B1,IFIH1,IFIT2,IFITM3,IFNG,IL10,IL4,ISG15,ISG20,MX2,PLAAT4,PTGER2,PTGER4,SLC7A2,STAT1,STAT4,TLR3,TRIM5,USP18,ZBP1	1129 (16)
Ige		complex	Activated	4.296	25.9666	1.08e-26	ABAT,ACTN1,ALOX5,ANXA1,AQP3,ARRB1,BCL2,BCL2A1,BCL2L1,BCL2L11,BCL3,BCL6,BCR,BIRC5,BNIP5,C3,CAPN2,CARHSP1,CAV1,CCL1,CCL2,CCL22,CCL3,CCL3L3,CCL4,CCND2,CCR5,CD34,CD40,CD80,CD86,CDC42EP5,CDK19,CDKN1A,CEACAM1,CEBPA,CHST11,CISH,CLCF1,CLEC7A,COBLL1,COL18A1,CSF2,CSF3,CX3CL1,CXADR,CXCL2,CXCL3,CXCL8,CXCR5,DUSP2,DUSP3,EBI3,EDN1,EGR1,EGR2,ERRFI1,ETV5,F2R,FCGR2B,FGD2,FHL2,FLT1,FYN,GADD45B,GDF15,GIMAP1-GIMAP5,G…	2164 (15)
EIF2AK2	1.365	kinase	Activated	4.259	6.54821	2.83e-07	ATF3,BCL2,BCL2A1,BCL2L1,BDNF,BIRC2,BIRC5,BRIP1,CCND1,CDKN1A,CEBPB,CEBPD,CXCL8,DDIT3,EGR1,EIF2AK2,FOS,GABBR1,IFI27,IFI35,IFI6,IFIT1,IFIT2,IFIT5,IFITM1,IFITM2,IFNG,IL1A,IL1B,IL6,IRF1,ISG15,ISG20,JUN,LGALS3BP,NEDD9,NFKB2,NFKBIA,NMI,OAS1,OAS3,PARP9,PLSCR1,REC8,SOCS3,SP140,STAT1,TNF,TNFAIP3,UBE2L6,USP18	1288 (16)
THEM6	-1.339	other	Activated	4.243	5.51286	3.07e-06	ATF3,CYB5R2,CYP51A1,DDIT3,DHCR7,DNAJB11,EDEM1,ERP44,FICD,HERPUD1,HSD17B7,HSP90B1,HSPA5,MSMO1,MVD,NPC2,P4HB,PDIA4,SQLE,TSPYL2,WIPI1,XBP1
ELL2	1.374	transcription regulator	Activated	4.217	12.5114	3.08e-13	ARFGAP3,CCPG1,CITED2,CLPTM1L,CREB3L2,CRELD2,DNAJB9,DNAJC3,EAF2,EDEM1,EDEM2,FKBP2,FNDC3A,FNDC3B,FUT8,HDLBP,HM13,HOXA1,HSPA13,LMAN1,MANF,MDM2,NUCB1,PLPP5,PRDM1,RAPGEF3,REXO2,SDC1,SEC24D,SEC61A1,SEL1L,SLAMF7,SLC33A1,SLC66A3,SPCS1,SRPRA,TENT5C,TMEM154,TRIB1,TXNDC11,UBE2J1,XBP1
eltanexor		chemical drug	Activated	4.214	3.2652	0.000543	BRCA1,BRIP1,CCNA2,CCNE1,CCNE2,CHEK1,E2F1,E2F2,E2F8,FANCA,FANCB,H2AX,H3C8,MCM2,MCM5,PKMYT1,POLE2,RFC3	1451 (7)
Fcer1		complex	Activated	4.213	6.63078	2.34e-07	BCL2A1,CCL1,CCL2,CCL3,CCL3L3,CCL4,CD1A,CD4,CD83,CSF1,CSF2,CXCL3,CXCL8,FCGR2B,FOS,FYN,IDO1,IFIT2,IFNG,IL10,IL13,IL1B,IL1RN,IL4,IL6,ITPR1,JUN,KMO,LIF,NFATC1,S1PR2,SPHK1,TNF,TNFRSF9,TNFSF4,TNFSF9	1849 (17)
IL27	12.806	cytokine	Activated	4.207	17.055	8.81e-18	AHR,APOL1,B2M,BST2,CCL2,CCL20,CCL3,CCL4,CCND2,CD274,CD38,CD69,CD80,CD86,CEBPD,CIITA,CKLF,CR1,CSF2,CX3CL1,CXCL10,CXCL8,CXCL9,DEPP1,EGR1,EGR2,EIF2AK2,EOMES,FOS,FOXP3,GATA3,GBP2,GZMB,HLA-A,HLA-C,HLA-DOB,HLA-DQA1,HLA-DQB1,HLA-E,ICAM1,ICOS,ID2,IFNA2,IFNG,IFNLR1,IL10,IL10RB,IL12A,IL12B,IL12RB2,IL13,IL15RA,IL17A,IL18,IL18BP,IL1A,IL1B,IL1RN,IL2RA,IL4,IL6,IRF1,ITGAM,LAG3,MCL1,MX1,NFATC1,NR3C1,OAS1,PDCD1LG…	1564 (14)
5-azacytidine		chemical drug	Activated	4.195	4.007	9.84e-05	ABCB1,ANXA2,BBC3,BCL2L1,BRCA1,BTG3,CALR,CAV1,CAVIN1,CD44,CDKN1A,CDKN2B,CIITA,CLCF1,COL1A1,CXCL12,DUSP1,ECH1,EPHA2,ESR2,ETV5,FANCE,FOSL1,FOXP3,FYN,GADD45A,GDF15,HBEGF,HSP90B1,HSPA5,HSPA8,HSPD1,IFI6,IFNG,IRF7,IRF8,KLF4,KLF6,KRT18,LOX,MCL1,MGMT,MUC4,MYH6,MYH7,MYO1B,NKX2-5,NOS3,PLAU,PNRC1,PRAME,PTPRG,RHOB,RPS6KA6,RRM2,SERPINB8,SHANK3,SLC3A2,SOCS3,SOX9,SPHK1,TACSTD2,TERT,TFPI2,TGM2,THBS1,THBS2,TNFRSF1…	2105 (21)
medroxyprogesterone acetate		chemical drug	Activated	4.19	48.8633	1.37e-49	ABCB10,ACP5,ACTG1,ADCY1,ADCY4,ADRB2,AKT3,ALG2,ANGPT2,ANLN,AP3B2,ARSA,ARSB,ARSG,ASAH1,ASPM,ASS1,B4GALT1,BBC3,BCL2,BCL2L1,BCL2L11,BDNF,BIRC3,BIRC5,BMP4,BMPR2,BRIP1,BTG2,BUB1B,C15orf48,CAPN2,CAV1,CCL2,CCL3,CCL4,CCNA2,CCNB1,CCNB2,CCND1,CCND2,CCNE2,CCNG2,CCR5,CD44,CD68,CDC20,CDC25B,CDC25C,CDK1,CDK6,CDKN1A,CDKN1C,CDKN2B,CEBPA,CENPF,CKB,CKS2,COL4A3,COL4A4,COL4A6,CSF2RB,CSF3R,CTSB,CXCL10,CXCR4,CYP1A1,DDB…	2648 (24)
HMG20A	1.128	transcription regulator	Activated	4.19	10.9172	1.21e-11	ACSS2,ACTG1,ADM,ALDOC,ATF3,AXL,CD44,CD9,CHST2,CLDN12,CLU,CSF1,CX3CL1,CXADR,CXCL10,CYP51A1,DHCR7,EBI3,EDN1,EREG,ERRFI1,FGF2,GADD45A,GCH1,HBEGF,HSD17B7,IGFBP4,IL15RA,IL6,IRF7,ITGA2,ITGA5,JUN,KRT18,LAMA1,LIF,LSS,MVD,MYLK,NT5E,P3H1,PDGFRB,PLAUR,PMVK,PTGER2,RGS16,RTP4,SDC4,SEMA3B,SERPINE1,SNAI1,SPHK1,SQLE,STARD4,TGM2,THY1,TIMP1,TLR3,TNFRSF11B,TNFRSF12A,VCAM1,VCAN,VEGFA	1917 (13)
bromodeoxyuridine		chemical drug	Activated	4.187	8.06048	8.7e-09	BMP3,CSF1,CXCL10,CXCL8,IFI16,IFI27,IFI44,IFI6,IFIH1,IFIT1,IFIT2,IFIT3,IFITM1,IFNG,IGFBP4,IL1A,IL1B,IL24,IL36G,IL6,IL7,IL7R,IRF1,IRF7,ISG15,MX1,OAS1,PYHIN1,SERPINE1,SP110,STAT1,TNF,TNFSF10,TNFSF4	2200 (22)
FN1	11.189	enzyme	Activated	4.176	7.58838	2.58e-08	ACE,ACP5,ACTA2,ACTR2,ADD1,AHCY,APOE,APP,BCL2,BIRC3,BIRC5,BNIP3L,CAPN2,CCL2,CCL4,CCND1,CCNE1,CCT4,CD83,CDH2,CDK6,CDKN1A,CEBPB,CHRNB4,COL1A1,CORO1A,CSF2,CTSD,CXCL2,CXCL3,CXCL8,EGFR,EPB41L1,FERMT2,FGF2,FN1,FOS,GPX1,IFNG,IL1B,IL1R1,IL6,IL7,IRS1,ITGA1,ITGA4,ITGA5,ITGAE,ITGAM,ITGB1,ITGB3,KIF21B,LGALS8,LIMS1,MARCKS,NES,NFKBIA,PDGFB,PDGFRA,PLAU,PLAUR,POU5F1,PREB,PTBP1,PXN,RNF125,RRAGD,RUNX2,SCRN1,SDC1,SD…	1630 (15)
imiquimod		chemical drug	Activated	4.145	7.74958	1.78e-08	ACAT1,BTG2,CCL22,CCL3,CCL3L3,CCL4,CCR7,CD274,CD40,CD80,CDC20,CLEC7A,CSF3,CSTA,CTSS,CXCL10,CXCL2,CXCL3,CXCL8,CXCR3,CYP27B1,DAG1,DDB2,DLX1,DNAJB2,E2F1,ECH1,ECI2,FHL3,FLI1,FOS,FOSL1,FSCN1,GATA4,GLI1,GRM8,HCK,HMGA1,ICAM1,ICAM3,IFI35,IFITM1,IFITM3,IFNA2,IFNG,IL10,IL12A,IL12B,IL17A,IL18,IL19,IL1A,IL1B,IL1RN,IL23A,IL2RA,IL36A,IL6,IL6R,IRF7,ISG15,ISG20,JUNB,LRG1,MITF,MSH2,MTAP,MX1,NAT14,NCAPG,NDRG3,NEK3,…	1231 (16)
calcimycin		chemical reagent	Activated	4.135	6.73993	1.82e-07	ACE,APP,AR,ATF3,BCL2L11,CALR,CASR,CCL20,CD1A,CD40,CD80,CD83,CD86,CSF2,CXCL8,DDIT3,DNAJC12,EGR1,FGF2,FN1,FOS,FOSL1,GCH1,HERPUD1,HSD17B1,HSP90B1,HSPA5,ICAM1,ID3,IFNG,IGF1,IL12A,IL12B,IL13,IL4,IL6,JUN,JUNB,LAT,LTA,MTHFR,PLCB3,PON2,PPARG,PRL,RCAN1,S100A2,SDF2L1,SERPINE1,STAR,SYN1,TLR2,TLR4,TNF,TNFSF10,UBXN4,VEGFA	1428 (16)
Jnk		group	Activated	4.123	10.6968	2.01e-11	A2M,ABCA1,ACTA2,ADARB1,ANXA5,APLN,APP,ASAH1,ATF2,BCL2L1,BCL2L11,BIRC3,BIRC5,BMF,BRCA1,BRMS1L,BTG1,CCL2,CCL22,CCL3,CCL4,CCND1,CCNE1,CCR7,CCR9,CD40,CD44,CD55,CD69,CD80,CD83,CD86,CDH2,COL1A1,CXCL12,CXCL3,CXCL8,CXCR4,DDIT3,DNMT1,DUSP1,EDN1,EGR1,ETS1,FBXO32,FLI1,FN1,FOS,GADD45A,GAP43,GDF15,GDNF,HES1,HSPA5,ICAM1,IFNG,IGF1,IL10,IL12A,IL12B,IL13,IL17A,IL19,IL1A,IL1B,IL23A,IL2RA,IL6,ITGA4,ITGB7,JUN,KLF6,M…	1348 (11)
BTK	1.031	kinase	Activated	4.112	15.6536	2.22e-16	AICDA,BBC3,BCL2A1,BCL2L1,CCL4,CCND2,CCNE1,CCR7,CCT6A,CD274,CD38,CD40,CD69,CD86,CDK6,CDKN1A,CEBPA,CEBPB,CISH,CTSA,CXCL10,CXCL3,CXCL8,CXCL9,CXCR4,DCSTAMP,E2F1,ENPEP,ETS1,FOXO1,ICOS,IFI35,IFI44L,IFIT1,IFIT3,IFITM1,IFNG,IGLL1/IGLL5,IL10,IL10RA,IL12B,IL13,IL18,IL1A,IL1B,IL27,IL2RA,IL6,IRF1,IRF9,ISG15,ISG20,ITGAX,ITGB3,JUN,LILRB4,MDM2,MPO,MX1,MX2,NCL,NFATC1,NFKB2,OAS2,OAS3,RB1,RP2,SLC2A3,SPI1,SPN,STAT1…	1598 (15)
TRAF6	1.038	enzyme	Activated	4.111	1.61798	0.0241	BIRC3,CCL2,CCL20,CD274,CD80,CSF2,CSF3,CXCL13,CXCL2,CXCL3,CXCL8,DEFB4A/DEFB4B,EGFR,GABARAPL1,ICAM1,IL10,IL12B,IL15,IL19,IL1B,IL6,IRF5,MCL1,NCF1,SELENOW,TNF,TNFAIP3,UBD
PRL	-33.405	cytokine	Activated	4.099	21.9431	1.14e-22	A2M,ABCG2,AEN,ANXA2,ANXA5,APP,B2M,BCL2,BCL2L1,BCL6,BST2,BTG1,CAMK1,CAMK2N1,CAPN2,CAV1,CCL2,CCL20,CCNB1,CCND1,CD40,CD69,CDKN1A,CEBPD,CISH,CLU,CNN3,COA7,COL1A1,CTSA,CTSB,CTSD,CTSS,CXCL10,CXCL2,CXCL3,CXCL9,DNAJA4,DTX3L,DVL1,EGFR,EGR1,EIF2AK2,EPSTI1,ERBB2,ERBB3,ESR2,FILIP1L,FN1,FOS,FZD2,GMPR,GNA12,GNRH1,GPNMB,GPSM1,GSTM1,HELZ2,HERC5,HERC6,HERPUD1,HES1,HSD11B2,HSD17B7,HSPD1,ICAM1,ICOSLG/LOC102723996,I…	2041 (17)
IRF1	1.561	transcription regulator	Activated	4.093	17.8928	1.28e-18	ACTA2,APOL6,B2M,BCL2,BRIP1,C1R,CASP1,CCL19,CCL2,CCL20,CCNB1,CCND1,CD274,CD40,CD80,CDH2,CDKN1A,CEACAM1,CEBPB,CIITA,CTSS,CXCL10,CXCL2,CXCL3,CXCL8,CXCL9,DST,E2F1,E2F3,EIF2AK2,ERAP1,FGL2,FN1,FOXP3,GBP2,GBP4,HELZ2,HLA-G,IDO1,IFI27,IFI35,IFI44,IFI44L,IFI6,IFIH1,IFIT1,IFIT2,IFIT3,IFIT5,IFITM1,IFITM3,IFNG,IL10,IL12A,IL12B,IL12RB1,IL12RB2,IL13,IL15,IL17RA,IL18,IL18BP,IL1B,IL23A,IL27,IL4,IL6,IL7,IRF1,IRF5,…	1420 (16)
Tlr		group	Activated	4.087	5.36351	4.33e-06	BCL6,CASP4,CCL2,CCL3,CCL4,CCR7,CD40,CD80,CD83,CD86,CISH,CLEC2B,CSF2,CXCL10,CXCL3,CXCL8,CXCR2,DUSP1,GPR34,HBEGF,HLA-A,ICAM1,ID2,IDO1,IFNA2,IFNG,IL10,IL12A,IL12B,IL1B,IL6,IRAK3,IRF1,IRF7,JAG1,NFKBIA,NOTCH1,NOTCH2,RGS1,RGS16,RGS20,SEMA3A,SIGIRR,SOCS1,SOCS3,SPHK1,STAT1,TNF,TNFAIP3,TNFSF13B,TREM1,WNT5A,ZBTB46,ZC3H12A	1614 (13)
F2	1.089	peptidase	Activated	4.086	19.4401	3.63e-20	ABCB11,ACTA2,AKR1B1,ALDH1B1,ANGPT2,ANGPTL4,B4GALT1,BCL3,BIRC2,BIRC3,CALR,CASP1,CBR3,CCL2,CCL20,CCNA2,CCND1,CCND2,CD36,CD44,CD55,CD68,CDKN1A,CITED4,CKAP4,CLU,COL1A1,CORO1C,COTL1,CX3CL1,CXCL10,CXCL13,CXCL3,CXCL8,CXCR4,DAAM1,DHRS9,DOCK10,DST,DUSP1,ECE1,EDN1,EDNRB,EGR1,EIF4A1,ELL2,EPO,EREG,ETS1,F2R,F2RL3,FGF2,FLT1,FN1,FOS,FOSL1,FOSL2,GNA13,GREM1,HBEGF,HDAC9,HMGA1,HSP90AA1,ICAM1,IER2,IER3,IGF1,IGFBP4,…	2367 (20)
palbociclib		chemical drug	Activated	4.076	12.3298	4.68e-13	ADM,ATF3,B2M,CCND1,CD274,CD83,CDK6,CDKN1A,CDT1,CENPF,CLSPN,DDX60,DUSP1,E2F1,EGR1,EGR3,FOXM1,GADD45A,GADD45B,GBP3,GBP4,HES1,HLA-A,HLA-C,ID2,IFI44,IFIT1,IFNG,IL6ST,IRF5,IRF7,IRF9,ISG15,JUN,JUNB,KIF11,KLF10,LIF,MDM2,MKI67,MX1,MXD1,NCAPG,OAS1,OASL,OLR1,PRKCB,PRL,RHOB,SOCS3,TAPBP,TET2,TNFRSF10B,TNFSF4,USP18,ZFP36	2413 (26)
AGT	1.904	growth factor	Activated	4.07	19.6635	2.17e-20	ACE,ACHE,ACTA2,ADAM23,ADAMTS4,ADM,ADORA2B,AEBP1,ANGPT2,ANK3,ANXA1,APLN,ARFGAP1,ARHGEF11,ARID2,ASPM,ATF3,ATP1B1,ATP6AP2,ATP6V0A4,BCL2,BDNF,BEX4,BMP1,BMP6,BRCA1,C1QTNF6,C3,C4A/C4B,C5AR1,CALR,CAV1,CBS/LOC102724560,CCDC80,CCL2,CCL3L3,CCL4,CCNB1,CCNB2,CCND1,CCND2,CCNE1,CCNE2,CCNF,CCR2,CCR5,CCR7,CD36,CD44,CD5L,CD68,CD86,CDC20,CDC5L,CDK1,CDKN1A,CDKN1C,CDKN3,CEL,CENPE,CGREF1,CIT,CLEC4M,CLGN,CNN1,CNR1,COL…	2861 (19)
IRF3	1.045	transcription regulator	Activated	4.04	9.08938	8.14e-10	AHNAK,ANOS1,ANXA4,B2M,BIRC2,BIRC3,BTLA,CALHM6,CCL19,CCL2,CCL3,CCL3L3,CCL4,CCRL2,CD274,CD40,CD58,CD69,CD86,CDH2,CX3CL1,CXCL10,CXCL8,DDX60,EIF2AK2,FN1,GBP1,GBP5,HELZ2,HLA-F,ICAM1,IFI16,IFI27,IFI44,IFI44L,IFI6,IFIH1,IFIT1,IFIT2,IFIT3,IFITM3,IFNA2,IFNG,IL10,IL12A,IL12B,IL15,IL17A,IL1A,IL1B,IL23A,IL27,IL4,IL6,IRF1,IRF5,IRF7,ISG15,ISG20,JUNB,LAG3,NECTIN2,NR3C1,NT5C3A,OAS1,OAS2,OAS3,OASL,PHF11,PLAC8,PLA…	981 (13)
STAT		group	Activated	4.04	4.4034	3.95e-05	A2M,BCL2L1,CASP1,CDKN1A,CEBPD,CISH,EIF2AK2,FOS,HAMP,IL2RA,IL6ST,IRF1,JUNB,PIAS3,POMC,PTGER2,SMAD7,SOCS1,SOCS2,SOCS3,TIMP1,TNF	1803 (16)
PDGF BB		complex	Activated	4.037	17.3382	4.59e-18	ABCA1,ACKR3,ACTA2,ADARB1,ADM,ADRA1D,ADRB2,AHR,AKAP12,ATF3,BCL3,BMP3,BMP4,BMP6,BRCA1,C3,CALM1 (includes others),CASP4,CCL2,CCL20,CCND1,CCNE1,CD44,CDK1,CDKN1A,CEBPB,CEBPD,CNN1,COL18A1,COL1A1,CREB1,CSF1,CSF1R,CSF2,CSF3,CTH,CXCL2,CXCL8,DBNDD1,DCBLD2,DDIT3,DUSP1,DUSP5,EDN1,EDNRB,EGFR,EGR1,EGR2,EGR3,EPO,EREG,ETS1,ETS2,FBLN5,FGF2,FGFR1,FHL2,FLT1,FN1,FOS,FOSL1,FZD1,FZD2,GADD45A,GBP2,GDA,GDF15,GDNF,GEM,GH…	2176 (19)
N-ethyl-N-nitrosourea		chemical toxicant	Activated	4.035	5.011	9.75e-06	CCL1,CCL2,CDKN1A,CSF1,CSF2,CX3CL1,CXCL13,CXCL2,GSTM1,HSP90AA1,ICAM1,IFI35,IFI44,IFIH1,IFIT2,IFIT3,IFITM3,IFNG,IL13,IL17A,IL1B,IL4,IRF7,ISG15,ISG20,OAS1,OAS2,TGM2,TIMP1,TNF,TNFRSF1A,TNFRSF1B,TNFSF8
CD40LG	1.234	cytokine	Activated	4.034	29.3054	4.95e-30	A4GALT,ADAM28,AHR,AICDA,AKAP13,ALCAM,APOBEC3G,ARSB,ATF3,ATF5,AUH,AXL,B2M,BCL2,BCL2A1,BCL2L1,BCL6,BIRC2,BIRC3,BNIP3,BTG1,BTG3,CA2,CASP1,CBX3,CCL15,CCL19,CCL2,CCL20,CCL22,CCL3,CCL3L3,CCL4,CCNG1,CCNG2,CCR1,CCR2,CCR5,CCR7,CD1C,CD1D,CD27,CD38,CD40,CD44,CD69,CD80,CD83,CD86,CDC25B,CDK5R1,CDK6,CDKN1A,CFP,CHRM5,CIITA,CLU,CSF1,CSTF2,CXCL10,CXCL2,CXCL8,CXCR3,CXCR4,CYP1B1,CYTIP,DDX46,DUSP1,DUSP2,DUSP5,E2F2,E…	1778 (15)
Klrk1		transmembrane receptor	Activated	4.034	5.59688	2.53e-06	CCL3L3,CCL4,CCR5,CD96,CSF1,CSF2,IFNG,IFNGR1,IL10,IL12RB2,IL18R1,IL18RAP,IRF8,KLRC1,KLRD1,LAG3,NKG7,PRDM1,SEMA4A,SLA2,STAT1,TBX21,TNF	1824 (18)
ASPSCR1-TFE3		fusion gene/product	Activated	4.033	8.07883	8.34e-09	ABHD2,ADGRG1,APOE,APOL2,ASAH1,ATP6V0A1,ATP6V0E1,AVPI1,BHLHE41,BIN1,CTSA,CTSD,CTTN,CYP17A1,DST,EPOR,EZR,G0S2,GABARAPL1,GDF15,GNS,GPNMB,GRN,HLA-E,IGF2R,KCNJ4,LOC102724788/PRODH,MREG,MYOF,NMRK2,NPC2,OLFML2A,P4HA2,PACSIN2,PXN,RAB32,RHBDF1,RRAGD,SFXN3,SLC19A2,SLC38A7,STOM,STX3,SUV39H1,SV2B,TACC2,TCN2,THEM6,THEMIS2,UAP1L1,UPP1,VAT1,WIPI1
IL1		group	Activated	4.023	7.44977	3.55e-08	ABCG2,ADAMTS4,ADRB2,AHR,AKR1C1/AKR1C2,APOE,APP,AR,BCL2,BDNF,C3,CASP1,CBR3,CCL1,CCL2,CCL20,CCL3,CCL4,CCR7,CD1A,CD34,CD40,CD55,CDKN1A,CEACAM1,CEBPD,CHI3L1,CLEC7A,COL1A1,COL2A1,CSF1,CSF1R,CSF2,CSF2RB,CSF3,CTSB,CXCL10,CXCL2,CXCL3,CXCL8,CXCL9,CYP17A1,CYP1A1,CYP27A1,DEFB4A/DEFB4B,DUSP1,EDN1,EGFR,EGR1,ELF3,EPO,F2RL3,FN1,FOS,FZD5,GCK,GDF15,GDNF,GLS,GRM3,HGF,HMGB1,HSD11B1,ICAM1,IDO1,IFNG,IGF1,IL10,IL17A,I…	2063 (14)
ECSIT	-1.184	transcription regulator	Activated	4.008	4.15677	6.97e-05	BCL3,CCL3L1,CD44,CD83,CXCL8,IER3,IL1B,IL1RN,IL6,IRF7,JUNB,NFKB2,NFKBIA,NFKBIE,PLAUR,TNFAIP3,TRAF1	917 (11)
TFEB	1.025	transcription regulator	Activated	3.99	2.38616	0.00411	ALOX5,ARSA,ARSB,ASAH1,ATP6V0E1,ATP6V1A,CH25H,CHCHD6,CTSA,CTSB,CTSD,FOXP3,GAA,GABARAP,GALNS,GATA4,GLMP,GNPTG,GNS,HPS3,ICOS,IFNG,IGF2R,IL17A,IL1B,IL6,MITF,MYH7,NRBF2,PLBD2,PPARG,PPT2,RRAGC,SGSH,SLC1A3,SQSTM1,SUMF1,TNFRSF18,TPP1,VEGFA,VPS18,VPS8,WIPI1,WT1	1694 (10)
Z36		chemical reagent	Activated	3.988	3.50446	0.000313	BBC3,CDKN1A,CEBPB,CHAC1,CREBRF,DDIT3,DNAJB9,ERN1,HERPUD1,HSPA5,INSIG1,MAP1LC3B2,NUPR1,RETREG1,WIPI1,XBP1	1420 (11)
TCF7L2	2.61	transcription regulator	Activated	3.978	12.5391	2.89e-13	ACOT4,ACSL1,ADAMTS4,ADD1,ADGRG1,ADO,ALOX5,ALPP,ANKRD13A,ANLN,ANXA1,APLP1,APOD,AQP3,AQP9,AR,ARHGDIB,ARHGEF10,ASPA,ASPH,ATP8B1,AXIN2,BAMBI,BIN1,BIRC5,BMP4,CAMK2N1,CARHSP1,CASR,CCND1,CCND2,CCNYL1,CD24,CD4,CD44,CDH17,CDK19,CDKN1A,CEBPA,CEMIP2,CERS2,CILK1,CLDN11,CREB3L2,CREB5,CSF3,CSF3R,CTNNAL1,CYP51A1,DBNDD2,DEGS1,DOCK10,DOCK9,EDN1,EFNB1,EGFR,EHHADH,ENC1,ENPP2,ENPP4,EPCAM,EPHB1,ERBB3,EVI2A,FA2H,FBP1,…	2290 (23)
YBX1	-1.189	transcription regulator	Activated	3.975	4.23807	5.78e-05	ABCB1,ACTA2,ANG,APOL2,BCL2,BCL2L1,BRMS1L,CCL20,CDC34,CDK6,CDKN1A,COL1A1,CSF2,CXCL2,CXCL8,CYP19A1,DEFB4A/DEFB4B,EGFR,EPHA2,ERBB2,EREG,FGF2,FGFR1,FOS,GABPB1,HES2,HGF,HLA-DQB1,HSD17B1,ICAM1,ID1,IL1A,IL1B,IL6,IRF5,KLF4,LGALS3,MCL1,mir-210,MUC1,MUC13,MVP,MYCL,OSM,PDGFB,PDK1,PLAC1,PLAUR,RRM2,S100A13,SIVA1,SLC2A3,SLC5A2,SNAI1,STC2,TRIM14,ZAP70	1948 (16)
stallimycin		biologic drug	Activated	3.973	8.95468	1.11e-09	BMP3,CSF1,CXCL10,CXCL8,IFI16,IFI27,IFI44,IFI6,IFIH1,IFIT1,IFIT2,IFIT3,IFITM1,IFNG,IL1A,IL1B,IL24,IL36G,IL6,IL7,IL7R,IRF1,IRF7,ISG15,MX1,OAS1,PYHIN1,SP110,STAT1,TNF,TNFSF10,TNFSF4	1741 (15)
CEBPA	-3.887	transcription regulator	Activated	3.964	12.8356	1.46e-13	A2M,ABCA3,ABCB1,ACSL1,AGPAT2,AKAP12,AKR1B1,AKR1C1/AKR1C2,ALOX5AP,ANXA1,APLN,ARHGEF5,ARL4C,ASS1,B9D1,BCL2,BCL2A1,BIK,BIN1,BTG1,BTG2,C3,CA2,CCL20,CCL3,CCL4,CCNA2,CCNB2,CCND1,CCND2,CCR1,CD7,CDKN1A,CEBPA,CEBPB,CEBPD,CETP,CHI3L1,CIITA,CKAP4,CNFN,COL1A1,CPB2,CRADD,CREG1,CSF1,CSF1R,CSF3,CSF3R,CXCL8,CXCR4,CYP19A1,DHCR7,DHFR,DYNLT3,E2F1,EBF1,EFNB2,EGR2,EIF4E,EXTL2,F8,FLT1,FOS,FOXM1,FOXO1,FZD1,G0S2,GABPA,G…	2276 (24)
cigarette smoke		chemical toxicant	Activated	3.963	7.45967	3.47e-08	ABCA1,ADM,AHR,AIM2,ATF6,AXIN2,BCL2,BCL2L1,BIK,BIRC5,C3,CCL2,CCND1,CDKN1A,CKB,CLU,CSF2,CXCL10,CXCL2,CXCL3,CXCL8,CYP1A1,CYP1B1,DDIT3,DEFB4A/DEFB4B,DNMT1,EBI3,EGR1,ELK1,ERN1,FBXO32,FN1,FOS,FOSL1,GCLC,GCLM,HSPA5,ICAM1,IFITM1,IFNG,IGF1,IL10,IL13,IL1A,IL1B,IL27,IL4,IL6,IRAK1,IRAK2,JUN,KLF4,LAMP2,LRP1,MAPK8IP3,MUC1,MUC4,MX1,NFKBIA,NQO1,OAS1,OAS2,OAS3,OASL,P2RX1,P2RX7,P2RY4,PDGFB,PDK2,PGF,PPARA,PRDX1,PTG…	1593 (13)
TP73	2.467	transcription regulator	Activated	3.959	26.1494	7.09e-27	ABCB1,ACTA2,ADA,ADAM19,ADAM23,ADORA2B,AEN,AFAP1,ANGPTL4,AQP3,ARHGAP22,ARVCF,ATF3,ATG10,AUH,AURKA,AXL,B2M,BBC3,BCL11B,BCL2,BCL2L11,BIRC2,BIRC5,BRAF,BTG2,C1R,C3,CADM1,CAMSAP3,CASP1,CASP4,CASS4,CCL2,CCNA2,CCNB1,CCNF,CCNG1,CCNG2,CCR7,CCR8,CCR9,CD55,CD82,CD83,CDC20,CDC25B,CDC25C,CDC42EP2,CDH22,CDK1,CDK6,CDKN1A,CDKN1C,CDKN3,CITED2,CKS2,CLEC7A,CLIP3,CLMN,CNN3,COL18A1,COL1A1,CTH,CTSD,CX3CL1,CXCL10,CXCL2,…	1864 (16)
nelfinavir		chemical drug	Activated	3.95	4.25493	5.56e-05	ACP3,ADM2,ALDH1L2,APOBR,ATF3,CEBPA,CFAP91,CH25H,CHAC1,CTH,DDIT3,DDR2,DENND2D,FAM102A,HERPUD1,JAG1,KLF4,LIPE,LONRF1,LURAP1L,NUPR1,PLIN4,PPARG,PSAT1,SERPINA9,SESN2,SLC1A4,SLC6A9,SLC7A11,STC2,STK40,TECTA,TNFRSF10B,TNFRSF11B,TSC22D3,VLDLR,XBP1,ZNF674	497 (4)
CSF1	2.949	cytokine	Activated	3.949	26.2182	6.05e-27	ABCA1,ABCA9,ACP5,ADGRE5,ALOX5,APOE,APP,AXL,BCL2,BCL2L1,BCL2L11,BIRC5,C5AR1,CAPN2,CCL2,CCL3,CCNB1,CCND1,CCND2,CCNE1,CCR1,CCR2,CCR5,CD163L1,CD1A,CD36,CD68,CD80,CD83,CD86,CD9,CDKN1A,CEBPA,CFP,CLEC7A,CREB1,CSF1,CSF1R,CTSD,CX3CR1,CXCL10,CXCL2,CXCL3,CXCL9,CYP17A1,CYP51A1,DAGLA,DHCR7,DOK2,DUSP1,DUSP5,EGR1,EGR2,EGR3,ETS2,F2R,FCGR2A,FCGRT,FHL2,FN1,FOS,GAB3,GAS7,GDF15,GLS,GPNMB,GPR34,GPR68,GPT,GRAP2,HLA-A,…	2115 (14)
IL7	-1.479	cytokine	Activated	3.94	14.3134	4.86e-15	AHR,BCL2,BCL2L1,BCL2L11,BLNK,BTLA,CBLB,CCL2,CCL3,CCL4,CCND2,CCR9,CD247,CD274,CD69,CD86,CDK6,CDKN1A,CEACAM1,CISH,COL1A1,CSF1,CSF2,CXCL2,CXCL3,CXCR4,DARS2,DPP4,DUSP5,E2F1,E2F2,E2F3,EBF1,FN1,FOXO1,FOXP3,GATA3,GFI1,HAVCR2,ICOS,IFNG,IL13,IL17A,IL18R1,IL18RAP,IL1R1,IL24,IL2RA,IL4,IL6,IL7,IL7R,ITGB7,JAK3,KLF2,KLRC4-KLRK1/KLRK1,LEF1,LIF,LTA,LTB,LYN,MAPKAPK3,MCL1,MX1,NTN1,PDCD1,PIM2,RAG1,RGS16,RUNX2,S1PR1…	1650 (14)
oblimersen		biologic drug	Activated	3.94	11.1938	6.4e-12	ADM,ATF3,BCL2,BCL2L1,BST2,CDKN1A,CEBPD,CXCL8,DUSP1,EFNB2,GADD45A,GADD45B,H2AC8,IFI16,IFI27,IFI35,IFI44,IFI6,IFIT1,IFIT3,IFITM1,IL24,IRF7,ISG15,KLF10,MSX1,MX1,MX2,N4BP1,OAS1,OAS2,OASL,PRKCA,RSAD2,SCG5,STAT1,SULT1A2,TRIM14,TRIP11
IL17A	16.329	cytokine	Activated	3.931	13.9747	1.06e-14	ACTA2,B2M,BCL2,BCL2A1,BCL2L1,BCL3,BIRC5,C15orf48,C3,CCL2,CCL20,CCL22,CCL4,CCND1,CCR5,CD274,CD40,CD68,CD83,CDH2,CEBPB,CEBPD,COL1A1,COL2A1,COTL1,CSF2,CSF3,CTTN,CX3CL1,CXCL10,CXCL12,CXCL13,CXCL2,CXCL3,CXCL8,CXCR4,CYP7B1,DEFB4A/DEFB4B,DLX1,EGR2,ELF3,EREG,FGF2,FN1,FOS,FOSL1,GADD45A,GBP2,HBEGF,HGF,HSPB8,ICAM1,IFNG,IGF1,IL10,IL12A,IL12B,IL12RB2,IL13,IL17A,IL17RA,IL18,IL19,IL1A,IL1B,IL1RN,IL23A,IL24,IL27…	1644 (13)
STAT3	3.339	transcription regulator	Activated	3.928	31.3936	4.04e-32	A2M,ACTA2,ADM,AHR,AICDA,AKT1,ANGPT2,ANGPTL4,APLN,ARNTL2,ARRDC4,ATP10A,ATP6AP2,BCL2,BCL2L1,BCL2L11,BCL3,BCL6,BCL9L,BEX2,BIRC5,BMF,BNIP3L,BST2,C3,C5AR1,CALHM6,CAMK2D,CASP1,CASP4,CCDC88A,CCL2,CCL20,CCL3L3,CCL4,CCNB1,CCND1,CCND2,CCNE1,CCR1,CCR5,CCRL2,CD226,CD274,CD40,CD44,CD80,CD83,CD86,CD9,CDH2,CDK1,CDKN1A,CDKN2B,CDKN2D,CDON,CDYL,CEACAM1,CEBPA,CEBPB,CEBPD,CEP70,CHEK1,CHI3L1,CHL1,CIITA,CLIC5,COL1A1,C…	1675 (15)
SP1	-1.093	transcription regulator	Activated	3.925	23.7986	1.59e-24	ABCA1,ABCB1,ABHD2,ACSL1,ACSS1,ACTA2,ACVRL1,ADA,ADCY4,ADRA1B,ADRA1D,ADSS2,AEBP1,AKAP12,ALOX15B,ALOX5,ANK1,ANKH,APOE,AR,ASS1,ATF3,ATP7A,BBC3,BCL2,BDNF,BIRC5,BMP4,BNIP3L,C1QBP,CAV1,CBS/LOC102724560,CCL2,CCL20,CCL22,CCNA2,CCND1,CCND2,CCNG2,CD28,CD40,CD55,CD99,CDC25B,CDC25C,CDH2,CDK1,CDK6,CDKN1A,CDKN2B,CDKN2C,CDKN2D,CEACAM1,CEBPA,CEBPB,CEBPD,CENPX,CETP,CHGA,CHI3L1,CHRNB4,CIITA,CITED2,CKB,COL1A1,COL2A1…	2493 (25)
CD28	3.543	transmembrane receptor	Activated	3.925	10.3116	4.88e-11	AHR,ANXA1,ARHGDIB,ATF2,BCL2,BCL2A1,BCL2L1,BIN1,BTG1,CASP6,CBLB,CCL3,CCL4,CCND1,CCND2,CCNE1,CCR5,CCR9,CD226,CD247,CD27,CD274,CD28,CD69,CD80,CD86,CDK6,CENPF,CH25H,CISH,CORT,CREM,CSF2,CXCL13,CXCL2,CXCL8,CXCR3,CXCR4,DAD1,EBI3,EGR2,EIF4E,EOMES,FKBP2,FOS,FOXP3,FYB1,FYN,GAPDH,GATA3,GBP1,GBP2,GFUS,GLI1,GLS2,GOLGB1,GUCY1B1,GYS1,GZMB,HAMP,HAT1,HAVCR2,HLA-DQB1,HMGN2,HOMER2,HSPA8,ICOS,IFITM1,IFNG,IFNGR1,IGFB…	1636 (14)
G protein alpha i		group	Activated	3.923	9.06298	8.65e-10	ATF3,C15orf48,C1R,C1S,C4A/C4B,CD274,CEBPD,CMKLR1,CXCL10,F2R,FAM167A,FCGR2A,FCGR2B,FOS,FOSL1,FOSL2,GBP2,GBP4,GBP5,GBP6,GEM,HLA-A,IFIH1,IFIT3,IFITM3,ISG15,KLF4,LIF,MYH11,PMVK,PTHLH,RAB20,RSAD2,SERPING1,SOCS3,SP6,SPHK1,STAR,TAGLN2,TAP1,THBS1,TIMP1,TNFRSF12A,TUBB6,USP18	1793 (18)
trovafloxacin		chemical drug	Activated	3.901	5.05453	8.82e-06	ADRB2,B2M,BIRC3,CDKN1A,CEBPA,CHFR,CLDN14,CSF2,CXCL2,CXCL3,DNAJB2,EGFR,ERRFI1,ETS2,FOS,GCLC,HLA-A,ICAM1,IL17RA,IL6,IRF1,ISG20,JUNB,MDM2,NEDD4L,NFKBIA,PDE4B,SERPINE1,SOCS2,SOCS3,STAT3,TGM2,THBS1,TNFAIP3,VEGFA	1544 (13)
Ifn		group	Activated	3.883	11.0074	9.83e-12	B2M,BCL6,CD40,CD44,CD58,CD69,CD80,CD83,CD86,CH25H,CXCL10,CXCR3,EDN1,EIF2AK2,FOS,HGF,HLA-A,ICAM1,IDO1,IFI16,IFIH1,IFIT1,IFITM1,IFITM3,IGF1,IL10,IL10RA,IL12B,IL15,IL15RA,IL17A,IL1R1,IL23A,IL27,IL32,IL7,IRF1,IRF7,IRF8,ISG15,ISG20,ITGA4,MX1,NTRK2,NUB1,OAS2,OAS3,OASL,PECAM1,PLAAT4,PTAFR,PTPRJ,RSAD2,SERPINE1,SOCS1,SP100,STAR,STAT1,TAP1,TFRC,TLR2,TLR3,TLR5,TLR7,TNFSF13B,TRIM22,TYMP,ZBP1	1168 (15)
STAT1/3/5 dimer		complex	Activated	3.86	3.39686	0.000401	BCL2L1,BCL3,CEBPD,CHI3L1,CISH,FOS,IL6ST,IRF1,JUNB,MT2A,PLAU,POMC,SOCS2,SOCS3,TIMP1
E. coli lipopolysaccharide		chemical - endogenous non-mammalian	Activated	3.857	8.44612	3.58e-09	BCL2,BCL2L1,BCL2L11,CCL2,CCL22,CCL3,CCL4,CCR7,CD40,CD80,CD83,CD86,CEBPA,CEBPB,CEBPD,CSF2,CXCL10,CXCL2,CXCL3,CXCL8,EBI3,FOXP3,ICAM1,IFNG,IL10,IL12A,IL12B,IL15,IL18,IL1B,IL1R2,IL23A,IL27,IL32,IL6,MVD,MX1,PMVK,S100A9,SOCS3,TLR4,TNF,TREM1,VCAM1	1175 (13)
SELPLG	2.471	other	Activated	3.841	10.1938	6.4e-11	APOL3,BCL2A1,BST1,BTLA,CCL2,CCL3,CCL4,CD160,CDKN1A,CXCL2,CXCL8,CXCR4,CYP1B1,FOS,GNA13,HAVCR2,HCAR3,HCK,IDO1,IFNG,IGF1,IL10,IL1B,IL1R2,IL4R,ITGAM,LAG3,PDCD1,PLAUR,SERPINB9,THBD,TNF	1867 (15)
IFNA4	-1.992	cytokine	Activated	3.839	6.62342	2.38e-07	AP1S3,ATP2B4,CCRL2,CD274,CD69,CD86,CXCL10,CXCL9,GBP2,GBP5,HLA-E,IFIH1,IFIT1,IFIT2,IFNG,IL17A,IL4,IL6,ISG15,JAML,LILRB4,MX1,OASL,PLAAT4,PMEPA1,RSAD2,SLCO3A1,STAT4,TREML2,USP18,ZBP1	1621 (16)
IL4	7.749	cytokine	Activated	3.822	49.3605	4.36e-50	ABCA1,ABCA2,ABHD17C,ABLIM1,ACOT9,ACP2,ACP5,ACSL1,ACTA2,ACTG1,ADAM19,ADAMTS4,ADAP1,ADCY1,ADORA2A,ADORA2B,AGFG2,AGPAT4,AHNAK,AHR,AICDA,AKAP13,ALDOC,ALOX15B,ALOX5,ALOX5AP,ANXA1,ANXA2,ANXA4,APOE,APOLD1,APP,ARID5A,ARNTL2,ARSB,ASS1,ATP1A3,AUH,AUTS2,B4GALNT1,BBX,BCL11A,BCL2,BCL2L1,BCL3,BCL6,BDNF,BIN1,BIRC2,BIRC5,BNIP3,BNIP3L,BOP1,BPGM,BTAF1,C15orf48,C17orf99,C21orf62,C3,C5AR1,CA2,CAMK1D,CAPG,CARD16,CASP…	1939 (15)
EGR1	-1.607	transcription regulator	Activated	3.816	13.9957	1.01e-14	ABCB1,ACE,ACHE,ACTA2,ALOX5AP,APP,AR,ATF3,BCL2L11,CACNA1H,CACNA2D4,CASP6,CAV1,CAVIN1,CCL2,CCL3L3,CCL4,CCND1,CCND2,CCR1,CCR2,CD44,CDC20,CDK5R1,CDKN1A,CDKN2D,CHGA,CHGB,CLU,COL1A1,COL2A1,CREM,CSF1,CXCL2,CXCL3,CXCL8,CYP17A1,DLG4,EGFR,EGR1,EGR2,EIF4EBP1,ELK1,ENPEP,EREG,FGF2,FLT1,FN1,FOSL1,FOXP3,FYN,GAD1,GADD45A,GADD45B,GALNT3,GDF15,GDNF,GLI1,HBEGF,HPSE,ICAM1,ID1,IL13,IL1B,IL4,IL6R,ITGAM,JUN,JUNB,ME1,MX…	2385 (20)
SMARCB1	-1.281	transcription regulator	Activated	3.816	12.2782	5.27e-13	A2M,ABCB1,ACAT1,ACSL1,ACTR2,ARHGAP4,ATP1B1,AURKA,BAG3,BCL2L11,BMP4,BNIP3,BNIP3L,BTG1,C4A/C4B,CCDC85A,CCNA2,CCND1,CCNE1,CD44,CDC7,CDK1,CDKN1A,CDKN1C,CDKN2C,CDT1,CEACAM1,CENPA,CENPE,CIDEB,COL18A1,COL1A1,CSF1,CTTN,CXCR4,DHFR,DMC1,DNMT3A,DOCK4,DSC2,DSG2,E2F1,EIF2AK2,EIF4E,ERBB2,ETS2,F11R,FASTK,FBP1,FCGR2A,FOS,FOXP3,GFI1,GJB2,GLI3,GMNN,HBEGF,HES1,HES5,HEY1,HOXA1,IFI16,IFITM1,IFNG,IGFBP2,IL12B,IL15RA,I…	2397 (22)
fatty acid		chemical - endogenous mammalian	Activated	3.81	0.665546	0.216	ABCA1,AHR,AKT1,ATF6,BCL2,CD36,CPT1B,CREM,CXCL8,DDIT3,EPO,FADS1,GCK,HSPA5,IL1B,IL6,IRS1,ITGAM,LPIN2,NFKBIA,NRF1,PLIN4,PPARA,PPARD,PPARG,SCD,SERPINE1,SLC27A1,SLC30A3,SQSTM1,ST3GAL5,TNF,TNFRSF10B,TSLP,UCP2,VCAM1,VNN1
SLC15A4	1.332	transporter	Activated	3.809	17.0329	9.27e-18	ANKRD6,ANXA1,ANXA2,BCL2A1,BHLHA15,CADM1,CBLB,CCL2,CCNA2,CCNB2,CD274,CD72,CDC20,CKAP4,COL1A1,CRELD2,CRIP1,CSNK1E,CXCL10,CXCL8,DNAAF1,DOCK10,EDEM1,EPSTI1,F2R,FILIP1L,FKBP11,FOS,GBP4,GBP5,GINS2,HMMR,IFI16,IFI35,IFIT1,IFIT2,IFIT3,IFIT5,IFNGR1,IL1B,IL1R1,IL6,IRF7,ISG20,ITGAM,JCHAIN,KDELR3,LGALS3,MARCKSL1,MCM3,MCM5,MCM6,MIS18A,MYOF,NUSAP1,OASL,PBK,PLAUR,PLP2,REXO2,RGS1,RGS10,RRAS,S100A6,SAT1,SDF2L1,SEC…	1195 (16)
CpG ODN 1826		chemical reagent	Activated	3.804	4.40012	3.98e-05	ADRA1B,ADRB2,APP,CCL2,CCL22,CCL3L3,CCL4,CCR7,CD274,CD40,CD69,CD80,CD83,CD86,CIITA,CXCL10,CXCL3,CXCL8,DLL4,FCGR2B,HLA-DQB1,IFIT3,IFNG,IL10,IL12B,IL1A,IL1B,IL6,IRF7,LY96,mir-548,NCF1,OAS1,OAS2,OAS3,REL,RGS1,RGS2,SQSTM1,TLR4,TNF,TRPV1,XCL1	1412 (15)
JUN	1.346	transcription regulator	Activated	3.771	19.1972	6.35e-20	A2M,ABCB1,ACP5,ACTA2,AKAP12,AKT1,AKT3,ALPP,ANXA1,ANXA2,APOE,APOM,APP,AR,ARNTL2,ARTN,ATF3,AXL,BBC3,BCL2A1,BCL2L11,BCL3,BDNF,BEX2,BIRC2,BIRC3,BIRC5,BRCA1,BTG1,C3,C5AR1,CALM1 (includes others),CAPN2,CASP4,CAV1,CCL2,CCL20,CCNA2,CCND1,CCND2,CD247,CD274,CD44,CD68,CDC20,CDK1,CDK5R1,CDKN1A,CFP,CHGA,CHL1,CHST4,CLU,COL1A1,COL24A1,CSF1,CSF1R,CSF2,CSF3,CSTA,CX3CL1,CXCL10,CXCL3,CXCL8,CYP17A1,CYP19A1,CYP1B1,CY…	2355 (20)
IL12 (family)		group	Activated	3.77	11.8539	1.4e-12	ADA2,ADAM19,ALPP,AQP3,ATF3,BCL2,BCL2L1,BCL2L11,BCL3,BCL6,CCL3,CCL4,CCR5,CD274,CD4,CD44,CD69,CD80,CD86,CSF2,CTH,CXCR5,DEFB4A/DEFB4B,EGR2,ENPP2,ETV5,FOSL2,FOXP3,FURIN,FUT7,GAPDH,GATA3,GIMAP4,GNA15,GZMB,GZMH,ICOS,IDO1,IFNG,IKZF2,IL10,IL12RB2,IL13,IL17A,IL18R1,IL18RAP,IL1B,IL2RA,IL4,IL6,IRF1,IRF8,KLRC4-KLRK1/KLRK1,KLRD1,LAIR2,LEF1,LIF,mir-132,mir-25,NCR1,NCR3,NFKBIZ,NKG7,PDCD1,PIM2,PTPRC,SELL,SELPLG,…	1816 (14)
etoposide		chemical drug	Activated	3.768	11.7282	1.87e-12	ABCB1,ABCG1,ACHE,AKT1,ATF3,BBC3,BCL2,BCL2A1,BCL2L1,BCL2L10,BCL2L11,BCL2L14,BDNF,BIN1,BIRC2,BIRC3,BIRC5,BLM,CA2,CCL2,CCL3,CCNB1,CCND1,CD274,CD40,CD80,CD86,CDC20,CDC25B,CDK1,CDKN1A,CEBPA,CHCHD6,CREG1,CROCC,CSF2,CTSD,CXCL10,CXCL2,CXCL3,CXCL8,DHX9,DNMT1,DUSP1,E2F1,E2F3,FANCA,FBXW7,FOXP3,GADD45A,GDF15,GLS2,GZMB,H2AX,ICAM1,ID1,ID2,IER3,IFIT2,IFNG,IL10,IL17A,IL1A,IL1B,IL6,IRF1,IRF7,JAK2,JUN,KCNK1,let-7,…	1762 (14)
NPM1	-1.262	transcription regulator	Activated	3.764	18.9914	1.02e-19	AKR1C1/AKR1C2,ANG,BAMBI,CADM1,CALR,CAMK1D,CCL2,CCL3,CCL4,CEACAM1,CEBPA,CEBPB,COL6A2,COL7A1,CSF1,CSF1R,CSF3,CXCL2,CXCL3,CXCL8,CYP27B1,DDB2,DNAJB2,E2F1,EBI3,EGLN3,EGR1,EGR3,ETS1,FN1,FOXM1,FRK,GEM,HBEGF,HDAC9,HILPDA,HOXA10,HOXA5,HOXA7,HOXA9,HSPA5,ICAM1,ICOSLG/LOC102723996,IFNG,IGFBP5,IL1A,IL1B,IL6,IL6ST,IL7,JAG1,JUN,JUNB,KLF10,KLF4,LAMC2,let-7,LIF,LOX,LOXL2,MEF2C,mir-29,MTSS1,MXI1,MYADM,MYO16,NPM1,N…	2214 (21)
PG3-Oc		chemical reagent	Activated	3.755	2.50446	0.00313	ACER2,ATF3,BBC3,CDKN1A,DDB2,DRAM1,EGFR,EPHA2,GDF15,HHAT,JAG1,LMNA,PRDM1,RNF19B,TNFRSF10B	1432 (7)
IL-1R		group	Activated	3.754	5.51004	3.09e-06	APP,CCL20,CCL3,CSF2,CSF3,CXCL2,CXCL3,CXCL8,EGFR,EREG,FGF2,HGF,ICAM1,IFNG,IGFBP4,IL17A,IL1A,IL1B,IL6,IL6ST,IL7,PDCD1,PLAU,PLAUR,SERPINB2,SERPINE1,TIMP1,TNF,TNFRSF10C,TNFRSF11B,TNFRSF1B,VEGFA	1391 (14)
EDN1	2.002	cytokine	Activated	3.751	10.5817	2.62e-11	ACTA2,ADAM19,ANXA1,ANXA4,ANXA5,APLN,ARHGEF11,ATF6,BCL2,BCL2A1,CALCRL,CCL2,CCND1,CCR7,CDH2,CDK1,CKAP5,COL7A1,CTNND1,CXCL8,CXCR4,EDN1,EDNRA,EDNRB,EGFR,EGR1,EREG,ERRFI1,EZR,FGF2,FN1,FOS,FOSL1,GATA4,GRN,HAND1,HBEGF,HCN2,HEY1,HSPA5,HSPA8,ICAM1,IL18,IL6,ITGA2,ITGA5,ITGAM,ITGB1,ITGB3,ITPR2,IVL,JUN,JUNB,MARCKSL1,MCAM,MITF,MMP7,MYH7,NCF1,NOX5,NPM1,OLR1,PDGFA,PLAU,PLAUR,PLCB4,PLOD1,POMC,PPARA,PRKCA,PRKCB,P…	2245 (17)
PAF1	-1.062	other	Activated	3.743	7.90309	1.25e-08	ARL4A,BAMBI,BIRC3,CCL3,CCL3L1,CCL3L3,CCL4L1/CCL4L2,CITED2,HELZ2,HERC5,HOXA9,IDO1,IFI44,IFI44L,IFIT3,IFITM3,ISG15,ISG20,KLF4,LRRN3,MXD1,NFKBIZ,OAS2,OAS3,OASL,PLAUR,PNP,SDC4,SERPINE1,TENT5A,ZFP36,ZNFX1	940 (7)
imipramine blue		chemical drug	Activated	3.741	4.44977	3.55e-05	AURKA,CASP4,CCNA2,CCNB1,CCND1,CCNE2,CCNF,CENPA,CENPE,CENPF,CYP4B1,E2F2,FOXM1,GADD45A,GSTO2,let-7,PLK1,PLK4,SOX9,STMN1	787 (7)
ARNT2	1.505	transcription regulator	Activated	3.739	2.75203	0.00177	ABCG1,ADAM28,AKR1B1,ANG,ANGPT2,ANGPTL4,APOE,BST1,CACNG1,CBFB,CCR1,CCS,CD86,CLCN1,CMKLR1,CXCR5,EGFR,EGR1,ELL2,EYA1,FCGR2A,FGF17,GDNF,GLI1,GLUL,GMCL1,GRIN1,GRM8,GTF3A,GZMH,HLA-A,HOMER1,ICAM1,IFI16,IGFBP4,IL6R,ITGB3,ITIH3,JAK2,KCNJ15,KCNQ1,KLK3,KRT5,LAMA2,LAMB3,LRRFIP1,MCM7,MSC,MYCL,MYH6,MYH7,NR5A1,PDLIM4,PEA15,PKIB,PLCB1,POU5F1,PTPN22,RGS10,SEMA5B,SLC2A3,SMAD3,SNN,SNX5,SRSF1,TCL1A,TERF1,TNF,TNFRSF9…
Nfat (family)		group	Activated	3.722	9.14935	7.09e-10	ACP5,ATF3,B4GALT1,BCL2,CCL2,CCL3,CCL3L3,CCND1,CD40,CSF2,CX3CL1,CXCL8,DAAM1,DHRS9,DLG4,DOCK10,EGR2,ELL2,FCER2,FGF18,FOXP3,HAVCR2,HBEGF,ICAM1,IFNG,IL10,IL13,IL17A,IL4,ITPR1,ITPR2,KIF13A,KLF6,LAG3,LBH,LTA,MB,NCOA7,OSCAR,PDCD1,PDCD1LG2,PDE3B,PDGFA,PDGFB,PGM2L1,PLPP1,RCAN1,RGS3,SAMD4A,SDC4,SERPINE1,TNF,TNFSF14,TNNI1,TRAF1,TUBB3,VCAM1	1605 (19)
TLR2	1.919	transmembrane receptor	Activated	3.716	11.1397	7.25e-12	ACTA2,APOBEC3G,APP,ATF3,BDNF,CCL2,CCL3L3,CCL4,CCR1,CCR2,CCR5,CCR9,CD1A,CD1C,CD40,CD69,CD80,CD86,CDKN1A,CEBPB,CEBPD,CISH,CR1L,CSF2,CSF3,CXCL10,CXCL2,CXCL3,CXCL8,CYP27B1,DEFB4A/DEFB4B,DUSP1,EBI3,FBXO32,FN1,FOS,FOXO1,FOXP3,GADD45A,GATA3,GBP3,GDNF,GPT,GRIN1,GRIN2A,HAVCR2,HLA-DQA1,HLA-DRB5,ICAM1,IFNG,IL10,IL12B,IL13,IL15,IL15RA,IL17A,IL18,IL1A,IL1B,IL1RN,IL23A,IL27,IL2RA,IL4,IL6,IRAK1,IRAK3,IRF1,ITGA4…	1394 (15)
TYROBP	4.686	transmembrane receptor	Activated	3.709	5.20691	6.21e-06	ABCC4,CCL2,CCL3,CCR7,CD40,CD69,CD83,CD86,CXCL8,FCGR2B,GPX1,ICAM1,IDO1,IFNG,IL10,IL10RA,IL18,IL1B,IL6,IRF8,ITGA5,ITGAM,ITGAX,ITGB1,KLRD1,NPC2,SAMSN1,SIRPB1,TCIRG1,TMEM106A,TNF,TNFRSF1B,TYROBP	1754 (15)
NFATC1	-1.793	transcription regulator	Activated	3.702	8.10846	7.79e-09	ACP5,AHR,ATF3,BCL2,CCND1,CCND2,CCR9,CD40,COL1A1,CSF2,CX3CR1,CXCR5,CYP1A1,CYP1B1,DCSTAMP,EDN1,EGR3,FCER2,FKBP11,FOXP3,GCK,GLI1,HNF1B,HSP90B1,ICAM1,ICOS,IFNG,IL12B,IL17A,IL1B,IL2RA,IL4,IL6,ITGB3,ITPR2,MYH11,MYH7,NFATC1,NQO1,OSCAR,PDCD1,PDIA4,PLS3,PPARG,PRDM1,PRLR,RAG1,RCAN1,SELL,SELPLG,SLAMF6,TBX21,THBS1,TNF,TNFSF10,TNFSF11,UTRN,VCAM1,XBP1,XCL2	1874 (20)
Brd4		kinase	Activated	3.702	6.01011	9.77e-07	ACTA2,ADAM19,ADGRG5,ATP8B4,BLNK,C1R,CCR2,CCR5,COL1A1,COL4A3,COL4A5,CXCR3,EDNRB,GPR174,GPR183,HGF,IL12B,IL1A,IL6,ITGA6,ITGAE,ITGB7,KLF4,LCK,LGALS3,LOX,LOXL2,LY86,MKNK2,NEK6,P2RY4,PDGFA,PECAM1,PLAT,PLAU,POLE4,POU5F1,PTBP1,SELL,SLC25A25,SLC2A3,SLC4A1,SOX2,SPON2,TIMP1,TLR4,TLR8,TNFSF10,TNFSF15,TNFSF8,WFDC2,ZNF296	2289 (23)
NFKBIZ	2.59	transcription regulator	Activated	3.687	4.25181	5.6e-05	CCL20,CCL3L3,CEBPD,CSF2,CSF3,CXCL3,CXCL8,DEFB4A/DEFB4B,IFNG,IL10,IL12B,IL13,IL17A,IL23A,IL36G,IL6,S100A9,TNF	1287 (12)
FOXC1	-1.58	transcription regulator	Activated	3.678	9.12552	7.49e-10	B2M,BCL2L11,BST2,CLU,COL1A1,COL2A1,CSTA,CXCR4,DMRTA2,EFNB2,ELF3,FGFR3,FOS,FOXO1,GBP1,GBP3,GBP4,GPNMB,HES5,HLA-C,HLA-DQB1,HLA-F,ICAM1,IFI27,IFI35,IFI6,IFIT1,IFIT2,IFIT3,IFITM1,IFITM3,IFNGR1,IRF1,IRF6,ISG15,ISG20,ITGB3,IVL,LFNG,MMP7,MUC1,MUC4,MX1,NFATC4,NOTCH1,OAS1,OAS2,OAS3,OASL,OSR2,OTX1,PAX6,PITX2,PLOD1,PTAFR,RUNX2,SATB2,SERPINE1,SLC35F3,SOCS3,SOX9,SSTR2,STAT1,STAT2,TCF15,TNFSF11,TRIM14,TRIM22,T…	877 (8)
RNY3	-1.023	other	Activated	3.674	10.821	1.51e-11	CXCL10,DDX60,EPSTI1,HERC5,HES4,IFI44,IFI44L,IFIT1,IFIT3,IFITM3,ISG15,LAMP3,MX1,OAS1,OAS2,OAS3,OASL,OTOF,RSAD2,RTP4,SERPING1,SPATS2L,TRIM6,XAF1	1194 (7)
concanavalin a		chemical drug	Activated	3.653	11.1349	7.33e-12	APP,BCL2,BCL2A1,BCL2L1,BCL2L11,CASP1,CCL1,CCL25,CCL3,CCL3L3,CCL4,CCR2,CD69,CD86,CDKN1A,CSF2,CSF3,CXCL10,CXCL2,CXCL8,DUSP2,EBI3,EGFR,EGR1,EGR3,FBP1,FOXO1,GATA3,GPT,HDGF,HMGB1,ICAM1,ICOS,IFNG,IL10,IL17A,IL18,IL18BP,IL1B,IL1RN,IL23A,IL27,IL2RA,IL32,IL4,IL6,IRF1,KCNA3,LAMP2,MCL1,NPR1,NR3C1,PDCD1,POMC,PRDM1,PRL,PRLR,PTGES2,PTPN7,RGS1,RGS2,SDC4,SOCS3,STAT1,TBX21,TERT,TLR3,TNF,TNFRSF18,TNFSF10,TP73,XCL1…	1502 (12)
E. coli B4 lipopolysaccharide		chemical toxicant	Activated	3.644	10.1871	6.5e-11	ABCB11,ABCB4,ANXA1,ARHGAP30,BCL2,BCL2L1,BIK,CA13,CALML4,CASP6,CCL1,CCL2,CCL20,CCL3L3,CCL4,CCR7,CD274,CD38,CD40,CD80,CD83,CD86,CENPA,CRADD,CSF2,CSF3,CXCL10,CXCL2,CXCL3,CXCL8,CXCL9,CYP27A1,CYTH4,EMB,ETS2,F13A1,F5,FBLIM1,FGL2,GBP2,GBP4,GNAI1,GPNMB,HGF,HLA-A,HSPB8,ICAM1,IFI16,IFI35,IFIT3,IFITM3,IFNG,IL10,IL12A,IL12B,IL13,IL15,IL17A,IL1A,IL1B,IL1R1,IL1RN,IL23A,IL27,IL4,IL6,IMP4,INPP5D,INVS,IRAK3,KIF20…	1061 (15)
deferoxamine		chemical drug	Activated	3.643	11.5719	2.68e-12	ACO1,ADGRG1,ADM,ANGPT2,ANGPTL4,ANKRD22,ANXA2,APLN,APP,ARNT,BCL2,BDNF,BNIP3,CACNA1E,CACNB4,CCL20,CCL3L3,CCL4,CCNB1,CCND1,CCND2,CCNE1,CCR7,CDKN1A,CITED2,CXCL8,CYTH1,DDIT3,DUSP1,DUSP10,DUSP16,DUSP5,EGFR,EGLN3,EPO,ERRFI1,F13A1,FGF18,FGF5,FLT1,FOS,GADD45A,GADD45B,GAS7,GDF15,GEM,HSPA13,HTR2B,ICAM1,IFI16,IFI6,IFIT5,IGF1,IGFBP2,IGFBP4,IGFBP5,IL32,IL6,ISCU,ISG20,ITGAM,ITGB7,JAG2,JUN,LAMA3,LRRC25,LY75,MCEM…	1893 (18)
SS18	-1.217	transcription regulator	Activated	3.638	2.52143	0.00301	BCL2L11,FOXP3,GADD45B,GCH1,GPR137B,HES4,JAG2,MSX1,NFATC1,PDGFB,RAB40B,RET,RRAD,SOCS3,SOX2,SOX8,SYNE1,TENT5C
PRMT1	-1.17	enzyme	Activated	3.634	1.00656	0.0985	ACTA2,AXIN2,BCL2,CCND1,CD274,CDH2,CEBPB,COL1A1,CPT1B,CXCL3,EGFR,FN1,GCLC,HOXA9,HSP90AA1,KLF4,let-7,mir-1307,mir-27,mir-423,MT2A,NKD1,PDCD1LG2,POU5F1,PPARA,PPARG,SERPINE1,SMAD7,SNAI1,TNF,VIM,ZEB2
N-acetylsphingosine		chemical reagent	Activated	3.622	1.40121	0.0397	BCL2,BCL2L1,BNIP3,CDKN1A,CEBPB,COL1A1,CXCL2,CXCL8,FOS,HSD11B1,JUN,MAP3K5,PDE3B,RB1,RBL1,SERPINE1,SPHK1,TNF
EBI3	1.315	cytokine	Activated	3.606	5.51004	3.09e-06	B2M,CCND2,CD274,CD80,CD86,CIITA,EOMES,FOS,GBP2,HAVCR2,HLA-A,HLA-C,HLA-DOB,HLA-DQA1,ICAM1,IFNG,IL10,IL12RB2,IL13,IL17A,IL4,IRF1,LAG3,MX1,NFATC1,PDCD1,PDCD1LG2,STAT1,STAT2,TAP1,TBX21,TNFSF10	1407 (14)
asciminib		chemical drug	Activated	3.606	5.14691	7.13e-06	ATAD2,DCTPP1,DNMT1,E2F8,MCM2,MCM3,MCM6,MCM7,NASP,PRKDC,RANBP1,SMC1A,SMC3
ITPR2	3.269	ion channel	Activated	3.604	2.91364	0.00122	AIM2,ALOX5AP,BEX4,CCL2,CCL3L3,CCL4,CD180,CD274,CD44,CLEC7A,CSF1R,CXCL10,CXCL13,CXCR3,GBP6,HSPA8,IL1B,ITPR1,LY96,NAIP,NCAPH,NCF1,NLRC4,PIK3CG,PTAFR,SEMA7A,THEMIS2,TLR5,TLR7,TNF,TNFAIP3,VNN1	1018 (13)
FCGR2A	3.496	transmembrane receptor	Activated	3.601	8.14327	7.19e-09	CCL1,CCL2,CCL22,CCL3,CCL4,CD40,CXCL10,CXCL2,CXCL3,CXCL8,GBP2,ICAM1,IFIT3,IFITM3,IFNA2,IFNG,IL10,IL12B,IL18,IL1B,IL23A,IL6,IRF7,ISG15,ISG20,MARCKSL1,OAS3,PECAM1,RASGRP1,SERPINE1,STAT1,TNF,USP18,VEGFA,XAF1	1333 (13)
enterotoxin B		biologic drug	Activated	3.601	5.56864	2.7e-06	BDNF,BNIP3L,BPGM,CCL2,CCL22,CCL3L3,CCL4,CD40,CD69,CD80,CSF2RB,CSF3,CXCL10,CXCL12,CXCL13,CXCL2,CXCL3,CXCR4,FBXO2,GPNMB,ICAM1,IFNG,IL10,IL10RB,IL12A,IL12B,IL17A,IL1B,IL2RA,IL4,IL6,LIF,LTBR,LY75,PFN2,RSAD2,SLC25A37,TNF,TNFAIP3,UCHL1,WT1	1819 (15)
GH1	2.704	growth factor	Activated	3.6	5.20761	6.2e-06	ACVR1,ATF3,BCL2,CCNB1,CDH2,CEBPA,CEBPB,CEBPD,CISH,CLU,CREB1,CXCR4,DDIT3,EGR1,ERBB3,FN1,FOS,GADD45A,GHR,GRIN1,GRIN2A,HDAC1,HOXA1,ID2,ID3,IGF1,IGFALS,IL4R,IL6,ITGA1,JUN,JUNB,JUP,MGST1,MYB,PRDX1,PRLR,PTMA,SATB1,SMARCA4,SNAI1,SOCS1,SOCS2,SOCS3,SOD1,STAR,TAF9,TFAP2A,TNFRSF1A,TRPA1,TRPV1,UBA7,VEZF1,VIM,ZFP36	2084 (23)
lysophosphatidic acid		chemical - other	Activated	3.577	5.55284	2.8e-06	ACTA2,BCL6,CCL2,CCL4,CCND1,CCNE1,CD36,CSF1,CXCL10,CXCL2,CXCL3,CXCL8,DUSP1,EDN1,EGFR,EGR1,FOS,GDNF,GRN,HYOU1,ICAM1,IL15,IL1B,IL6,ITGAM,JUN,JUNB,LIF,LIPE,LIPG,LRP6,MDM2,NOS3,PDGFRA,PDGFRB,PLAU,PLAUR,PPARG,PPP1R3B,SERPINE1,SNAI1,SOCS1,SPHK1,TNF,VCAM1,VEGFA,VIM,WNT5A	1881 (14)
IGF1R	-1.284	transmembrane receptor	Activated	3.564	1.18509	0.0653	ABCC4,ACSL1,ACTA2,ADRB2,APP,BCL2,BCL2L1,BCL2L11,CALU,CAPG,CAVIN3,CBFB,CCND1,CD36,CD38,CD5L,CD68,CD93,CDK1,CDKN1A,CEBPA,CEBPB,CETN2,CKS2,CLU,COL18A1,COL1A1,CTNND1,CTSD,CYP19A1,DDIT3,EDN1,EGR1,FOS,FOXP3,GABARAP,GCK,GLI1,GPER1,HSD17B7,HSPA5,ID2,IGF1,IGF2R,IGFBP2,IGFBP4,IGFBP5,IL17A,IL1A,IL1B,IL6,IRS1,ITGAM,KIF20A,KRT5,let-7,LIPE,mir-132,MYH7,NDN,NME1,NOS3,PDLIM2,PECR,PHLDA2,PLAT,PLAU,POU5F1,PRKN,RAB…
CGAS	-1.469	enzyme	Activated	3.557	5.22403	5.97e-06	CDKN1A,CSF2,CXCL10,CXCL8,DDX60,HERC5,IFI27,IFI44,IFI44L,IFI6,IFIT1,IFIT2,IFIT3,IL1A,IL1B,IL6,IRF7,ISG15,MX1,OAS1,OAS3,OASL,RSAD2,TNF,USP18	954 (17)
aldesleukin		biologic drug	Activated	3.545	3.88941	0.000129	B2M,BCL2,CALR,CD86,FCGR2A,FCGR2B,GLUL,HLA-C,HLA-DRB1,HLA-F,HLA-G,HLA-L,IFI35,IFITM1,IFNA2,IRF1,IRF9,ITM2B,JAK2,MX1,PDIA3,STAT1,TAP1,TAPBP,TNFRSF10C	696 (7)
TFE3	1.342	transcription regulator	Activated	3.534	0.477556	0.333	ASAH1,ATP6V0E1,CCNE1,CKB,GCK,INSIG1,IRS1,KLF2,PNPLA2,PPARG,SCD,SERPINE1,SLC1A1,SLC34A1,SMAD7,TPP1,VEGFA,WT1
GABARAPL2	1.217	other	Activated	3.5	3.03058	0.000932	ABCA2,ARSG,BLVRB,CSPG4,CSTB,CTSB,CXCR4,IDS,INSIG1,LAMB3,LGMN,NCSTN,NPC2,PDGFB,TPP1,UPP1
CpG oligonucleotide		chemical drug	Activated	3.496	12.2299	5.89e-13	ABCA1,AHR,AICDA,BCL2,BCL2A1,BIRC5,C5AR1,CASP4,CCL3L3,CCL4,CCNB2,CCR1,CCR8,CD274,CD34,CD36,CD40,CD58,CD80,CD83,CD86,CEBPB,CSE1L,CSF2,CXCL10,CXCL2,CXCL8,DDX60,DLL4,DNMT1,DUSP1,EGR1,ELOVL5,ETS2,FCGR2B,FCGRT,GBP3,GBP6,ICAM1,ICOSLG/LOC102723996,IDO1,IFI27,IFI6,IFIT2,IFIT3,IFNG,IL10,IL12A,IL12B,IL13,IL15,IL18,IL1B,IL23A,IL2RA,IL4,IL6,INPP5D,IRAK1,IRF7,ISG15,ITGAX,LYN,MCL1,MCM6,mir-132,mir-25,NFKBIZ,NOT…	1492 (14)
ESRRA	-1.349	transcription regulator	Activated	3.479	3.16813	0.000679	ABCC5,ACADVL,ACKR3,ACSL1,ADRB2,ALDOC,ALPP,ANGPTL4,ANXA1,APLN,APOLD1,ARHGAP24,ASAH1,CCL20,CCR2,CCR7,CD36,CDH2,CEBPA,CKB,COL1A1,COL4A4,CPT1B,CREB3L1,CSF3,CX3CL1,CX3CR1,CXCL10,CXCL12,CXCR4,CYB5A,CYP17A1,CYP19A1,CYP51A1,EFNA1,EFNB2,EGR3,EMP2,ENDOG,ENPEP,EPHA2,EPHB1,ERBB2,ESRRA,ETS1,FAM102A,FRAT2,FZD5,GAPDH,GJC1,GRB7,GSDMB,HAMP,IGFBP4,IL32,JAM3,KRT10-AS1,LIPA,LIPE,LOXL2,LRG1,MFGE8,MSX1,MYH6,MYH7,NOS3,…	2185 (21)
cardiotoxin		chemical - other	Activated	3.474	18.2403	5.75e-19	ANG,ANGPTL4,APLN,APOC2,ATP6V1A,B2M,BDNF,BIK,BIRC5,C5AR1,CASP1,CCL1,CCL2,CCL3L3,CCL4,CCNA2,CCND1,CCND2,CCNE1,CCNE2,CCR1,CCR2,CCR5,CD180,COL1A1,COL6A2,CSF1,CSF1R,CSF2RB,CSF3R,CTSB,CX3CL1,CXCL10,CXCL13,CXCR2,CXCR4,DOK2,DPP4,E2F1,E2F2,EDNRB,EPO,EZR,FGF11,FGF2,FGFR1,GDF11,GDNF,GM2A,GMNN,HBEGF,HGF,HSP90AA1,HSPA5,IFNG,IGF1,IGFBP7,IL10,IL10RA,IL10RB,IL13,IL15,IL17A,IL18,IL1A,IL1B,IL1R1,IL1RN,IL36G,IL4R,I…
MALP-2s		chemical reagent	Activated	3.472	6.97062	1.07e-07	BCL2A1,CCL3L3,CCL4,CD40,CD86,CXCL2,CXCL3,CYP27B1,IFNG,IL10,IL12B,IL15,IL15RA,IL1A,IL1B,IL6,ITGAM,MCL1,TLR2,TLR4,TNF	1426 (11)
JAK2	1.284	kinase	Activated	3.467	7.49757	3.18e-08	ACE,ACER2,ACTN1,AKAP12,AKT1,ALOX5,BBC3,BCL2L1,BCL2L11,BLNK,CASP1,CCL2,CCND1,CCND2,CD36,CDKN1A,CSF2,CXCL10,CXCL8,DCXR,DEFB4A/DEFB4B,EGR1,ENPP2,EPOR,ESRRA,F5,FCGR2B,FGF2,FN1,FOS,FOXO1,GBP2,GNRH1,ICAM1,IL17A,IL19,IL1B,IL6,IRF1,ITGA5,ITGAM,JAK2,JCHAIN,LAT2,LMO2,LYN,MPO,NDN,NFKBIZ,NKG7,OSM,PCBP4,PDE2A,PECAM1,PHLDA3,PLK2,PRKCB,RBP1,SDC4,SEMA6B,SERPINH1,SLC1A3,SOCS1,SOCS3,STAT1,STAT3,TAP1,TGM2,THBS1,TNF…	1435 (17)
FOXL2	1.107	transcription regulator	Activated	3.459	4.33913	4.58e-05	ACVR1,ACVR1C,ATF3,BCL2A1,CCL20,CCL3,CCL3L1,CCL3L3,CH25H,CLU,CXCL2,CXCL3,CYP17A1,CYP19A1,FOS,HMCN1,HRH2,ICAM1,IER3,IGF1,IL12A,IL6,LIF,MYB,MYO6,NR5A1,OSR2,PTGER2,PTHLH,RGS2,RXFP3,S1PR1,SERPINB2,SERPINE2,SOX9,SPRY1,TNFAIP3,TNFRSF1A,TNFSF4,ZNF165	1575 (20)
PARP2	-1.147	enzyme	Activated	3.459	3.14448	0.000717	CCL1,CCL4,CCR2,CCR5,CD36,CD80,CD83,CD86,CXCL13,IL23R,PDCD1,PPARG,TBX21,TNFRSF10B,XCL1	1812 (15)
PF-4878691		chemical drug	Activated	3.438	3.29843	0.000503	BCL2,BCL2L1,CCL2,CCL3,CCL4,CD40,CD80,CD83,CD86,CXCL10,CXCL8,IFNA2,IFNG,IL12B,IL1B,IL6,ISG15,MX1,STAT1,TNF	625 (7)
TLR5	-38.212	transmembrane receptor	Activated	3.437	5.02136	9.52e-06	ATF3,CCL20,CCL4,CD40,CD80,CD86,CSF2,CSF3,CXCL2,CXCL3,CXCL8,DEFB4A/DEFB4B,ICAM1,IL10,IL12B,IL15,IL17A,IL1A,IL1B,IL6,TLR7,TNF,TSLP	1207 (12)
reactive oxygen species		chemical toxicant	Activated	3.435	4.5784	2.64e-05	ACTA2,BCL2,BCL2L1,CASP1,CCL2,CD200,CD24,CD80,CDKN1A,CSF1R,CSF3,CXCL8,CXCR4,DDIT3,DEFB4A/DEFB4B,DUSP2,EDN1,EGFR,EIF4EBP1,ERBB2,ERBB3,ETS1,FGF2,FOXM1,GADD45A,GCK,GZMB,HBEGF,HPSE,HSPA5,IL13,IL1B,IL4,IL6,ITGB3,JUN,KLF6,LAMA1,MCL1,MDM2,mir-210,mir-27,RRAD,SERPINE1,SYP,TERT,TLR2,TNF,TNFAIP3,TNFSF11,TP73,TRPV1,UCP2,VCAM1,VEGFA,XBP1	1992 (15)
galactosylceramide-alpha		chemical reagent	Activated	3.43	5.84164	1.44e-06	CCL1,CCL2,CD1D,CD40,CD69,CD80,CD86,CSF2,CXCL3,EBI3,EGR2,FOXP3,GATA3,GPT,ICOS,IFNG,IL10,IL12A,IL12RB1,IL12RB2,IL13,IL17A,IL1B,IL4,IL6,IRF1,JUNB,LGALS3,PDCD1,REL,SLC27A4,TNF,TNFRSF9	1437 (18)
peptidoglycan		chemical - endogenous non-mammalian	Activated	3.42	9.8041	1.57e-10	BCL2A1,CCL2,CCL20,CCL3,CCL3L3,CCL4,CCR5,CCR8,CD200,CD274,CD40,CD69,CD80,CD86,CORO1A,CSF2,CSF3,CXCL10,CXCL2,CXCL3,CXCL8,CXCR4,DEFB4A/DEFB4B,DUSP1,EGR1,FOS,FOXP3,ICAM1,ICAM3,IFNG,IL10,IL12A,IL12B,IL13,IL17A,IL18,IL1A,IL1B,IL1RN,IL23A,IL2RA,IL4,IL6,IRF1,JUNB,MCL1,mir-132,NLRP3,PRAME,S100A9,SELL,SSTR2,TLR2,TLR4,TLR5,TLR7,TLR9,TMSB10/TMSB4X,TNF,VDR,VEZF1	972 (11)
CCL11	-1.023	cytokine	Activated	3.416	5.51004	3.09e-06	AIF1,BCL2,BCL2L1,BIRC5,BMP6,CCL2,CCL3L3,CCL4,CCR2,CCR3,CXCL12,CXCL2,CXCL3,CXCL8,CXCL9,DPP4,FGF5,HCAR3,ICAM1,IL1B,IL4,IL6,ITGA1,ITGA2,ITGAM,ITGB1,ORMDL3,PDGFA,TNF,TNFSF14,TNFSF4,XCR1	1207 (16)
ERK1/2		group	Activated	3.415	13.7212	1.9e-14	ABCA1,ALOX5,ANGPT2,APH1B,APLN,ARRB1,ASAH1,ATF6,ATP1A3,B2M,BCL2,BCL2A1,BCL2L1,BCL2L11,BDNF,BIRC2,BIRC3,BRCA1,C3,CALR,CAPN2,CAV1,CCL2,CCL20,CCL22,CCL3,CCL3L3,CCL4,CCND1,CCND2,CCR7,CD40,CD44,CD80,CD86,CDC25C,CDC42EP5,CDK1,CDKN1A,CEBPA,CEBPB,CLEC11A,CMA1,COL1A1,COL2A1,CSF2,CTSB,CXCL10,CXCL3,CXCL8,CXCR4,CYP17A1,CYP19A1,DDIT3,DUSP1,E2F1,ECE1,EDN1,EFNB2,EGR1,ELK1,ESR2,ETS1,EZR,FGF2,FLT1,FN1,FOS,FOSL1,FO…	2088 (16)
BCR (complex)		complex	Activated	3.414	17.0825	8.27e-18	AICDA,AIMP2,APBB1IP,ATF3,ATP6V0A1,B4GALT1,BANK1,BCL2,BCL2A1,BCL2L1,BCL2L11,BCL3,BCL6,BIK,BYSL,C15orf48,CALR,CBX3,CCL3,CCL4,CCNA2,CCND1,CCND2,CCNG2,CCR7,CD1C,CD22,CD27,CD44,CD69,CD7,CD80,CD86,CDK6,CDKN1A,CDKN2B,CLCF1,CLEC2D,COX17,CTCF,CTSS,CXCR4,CXCR5,DCTPP1,DUSP2,EGR1,EGR2,ELOVL5,EXOSC5,FAM107B,FCER2,FCGR2B,FCMR,FCRL1,FOS,FOSL2,FOXO1,GAPDH,GBP2,GFPT1,GLS,GNAQ,GPR183,GRWD1,GZMB,HNRNPA2B1,HSH2D,HSP…	1862 (17)
Mapk		group	Activated	3.407	5.44612	3.58e-06	ABCB1,ADA,APLN,APP,BCL2,BCL2L1,BDNF,CCL2,CCND1,CCR9,CDKN1A,CEBPB,CHRNB4,COL1A1,CXCL8,DBP,DLG4,EGR1,FOS,FURIN,GZMB,HGF,IFNG,IGF1,IL17A,IL1B,IL6,IRAK3,IRS1,ITGA4,ITGB7,JUN,JUNB,MMP7,MUC4,NOS1,NR3C1,PIGR,PPARD,PRKCZ,PRL,RUNX2,S100A10,SNAI1,SNCG,SOD1,STAT1,TNF,TUBB3,VCAM1,VEGFA	1983 (21)
laminaran		chemical drug	Activated	3.402	7.63264	2.33e-08	CCL20,CCL4,CCL4L1/CCL4L2,CXCL10,CXCL8,ELOVL7,EREG,G0S2,GCH1,HCAR3,IDO1,IFI44L,IL1A,IL1B,IL2RA,IL7R,ITGB8,MCOLN2,MT2A,OLR1,RSAD2,SERPINB2,SGPP2,SLC39A8,TNFAIP6,TNFRSF9,TNIP3,TRAF1	833 (13)
FSH		complex	Activated	3.397	15.6144	2.43e-16	ACP2,ACP3,ACP5,ACTA2,ACTG2,ACTN1,ACTR2,ADAMTS16,ADCY9,ADGRG1,ADM,AHR,AKAP12,AMOTL2,APLN,APP,AQP3,AR,ARHGEF5,ARL4C,ARPC1A,AXIN2,AXL,BCL11A,BDNF,BMPR2,BNIP3L,BTG2,CASP4,CCND1,CCND2,CD55,CDC42EP4,CDH2,CDK14,CDK6,CDKN1C,CH25H,CLEC11A,COL15A1,COL18A1,CPE,CREBL2,CREM,CRYM,CTNND1,CX3CL1,CXCR4,CYP17A1,CYP19A1,DHCR7,DHRS3,DNAJB9,DUSP1,DUSP3,EFNA1,EGFR,ELL2,ENC1,EREG,ESR2,EZR,FDXR,FGF2,FGFR1,FILIP1L,FOS,FO…	2680 (22)
CD5	1.264	transmembrane receptor	Activated	3.394	4.17328	6.71e-05	BCL2,BCL3,CCL3,CCL4,CCR7,CD4,CD69,CD72,CD80,CD86,CEBPB,CSNK1E,GZMB,ICAM1,IFNG,IL10,IL10RB,IL13,IL17A,IL23R,IL2RA,MAPK9,MSMO1,PIM2,STAT1,STAT3,TLR8,TLR9,WNT10A	1322 (15)
SIM1	1.905	transcription regulator	Activated	3.391	2.4045	0.00394	ABCG1,ADAM28,AKR1B1,ANG,ANGPT2,ANGPTL4,APOE,BST1,CACNG1,CBFB,CCR1,CCS,CD86,CLCN1,CMKLR1,CXCR5,EGFR,EGR1,ELL2,EPO,EYA1,FCGR2A,FGF17,GDNF,GLI1,GLUL,GMCL1,GRIN1,GRM8,GTF3A,GZMH,HLA-A,HOMER1,ICAM1,IFI16,IGFBP4,IL6R,ITGB3,ITIH3,JAK2,KCNJ15,KCNQ1,KLK3,KRT5,LAMA2,LAMB3,LRRFIP1,MCM7,MSC,MYCL,MYH6,MYH7,NR5A1,PDLIM4,PEA15,PKIB,PLCB1,POMC,POU5F1,PTPN22,RGS10,ROBO3,SEMA5B,SMAD3,SNN,SNX5,SRSF1,TCL1A,TERF1,TNF…	1599 (7)
SMAD3	2.352	transcription regulator	Activated	3.384	9.28819	5.15e-10	ABCG2,ACSS2,ACTA2,ACVR1C,ADAM23,AGPAT2,ARHGAP22,ARHGAP24,AXIN2,BCL2,BCL2L11,BMP6,C3,CCL2,CCL20,CCL3L3,CCL4,CCND1,CCND2,CCNE1,CCNG2,CDH2,CDKN1A,CDKN2B,CIITA,CKS1B,COL1A1,COL2A1,COL6A1,COL6A2,COL7A1,CPT1B,CXCL10,CXCL3,CYP19A1,CYP1A1,CYP51A1,DDIT3,DOCK4,E2F3,EDN1,EGR1,ENG,EREG,ESR2,FCGR2B,FN1,FOS,FOXO1,FOXP3,FSTL3,GADD45B,GATA3,GLI1,GLS,GZMB,HBEGF,HEY1,HHEX,HSP90B1,HSPA5,ID1,ID2,ID3,IFNG,IL12B,IL13,…	1967 (17)
KDM3A	1.577	transcription regulator	Activated	3.366	5.22403	5.97e-06	ACTA2,ADM,ALCAM,AR,ARHGEF28,CCL2,CCND1,CD9,CHRNB1,CUL7,EDN1,ETS1,FSTL3,GDF15,KLK2,KLK3,LOXL2,MCAM,MYH11,NKX3-1,PLOD2,PPP1R3C,SERPINE1,SLC45A3,TNXB	1348 (11)
CpG ODN 1668		chemical reagent	Activated	3.359	8.61618	2.42e-09	BCL2L1,CCL3L3,CCL4,CD200,CD40,CD69,CD80,CD86,CSF3,CXCL10,CXCL3,CXCL8,ICAM1,IFNG,IL10,IL12A,IL12B,IL17A,IL1A,IL1B,IL23A,IL27,IL6,IRAK3,IRF7,ISG15,PRDM1,SOCS1,SOCS3,STAT1,STAT2,TLR4,TLR5,TLR7,TLR9,TNF,XBP1	1010 (16)
Stat3-Stat3		complex	Activated	3.357	3.43297	0.000369	A2M,BCL2,BCL2L1,BIRC3,BIRC5,CCND1,CD36,CDKN1A,CXCL13,FCER2,FOS,FUT4,ICAM1,IL10,IL13,IL17A,IL23R,IL4R,IL6,LTA,MCL1,POMC,RORA,SOCS3,TNFSF11,VEGFA,WNT5A	2053 (25)
SFLLRN (PAR1-activator)		chemical reagent	Activated	3.357	1.85699	0.0139	CD55,DOK2,F13A1,FLT1,GAPDH,HSPA5,HSPD1,IL6,MYL9,PDLIM1,PEBP1,RGS10,SULT1A1,TAGLN2,UBE2N
Pam3-Cys-Ser-Lys4		chemical reagent	Activated	3.353	16.0334	9.26e-17	ADGRE5,AKAP13,ANGPT2,BCL2A1,BCL2L1,BCL2L11,CARD9,CASP4,CCL19,CCL2,CCL22,CCL3L3,CCL4,CCR1,CCR2,CCR5,CCR7,CD180,CD274,CD40,CD55,CD58,CD69,CD80,CD83,CD86,CSF1R,CSF2,CSF3,CX3CL1,CXCL10,CXCL13,CXCL2,CXCL3,CXCL8,CXCR2,DEFB4A/DEFB4B,EBI3,FCGR2A,FCGR2B,GFI1,HAVCR2,HLA-A,HLA-DRB5,ICAM1,ICOSLG/LOC102723996,IDO1,IER3,IFI16,IFNG,IL10,IL12A,IL12B,IL15,IL17A,IL18,IL1A,IL1B,IL23A,IL27,IL2RA,IL32,IL4,IL6,IRF1,IR…	1141 (11)
IFNK	5.349	cytokine	Activated	3.345	5.5867	2.59e-06	CD40,CD80,CD83,CD86,CXCL10,CXCL9,EIF2AK2,IFIH1,IFNG,IRF1,MX1,OAS1,PLAAT4,STAT1,STAT4,TLR3,ZBP1	1416 (17)
KDM5B	1.109	transcription regulator	Activated	3.342	10.2984	5.03e-11	AP4S1,AURKA,BBS9,BRCA1,BRD3,BUB1B,BUB3,CAV1,CCNB1,CCND1,CCNE1,CDC25C,CDCA3,CDK1,CLCF1,CYB5A,DDIT3,DLGAP5,E2F1,ECT2,EGR1,EHD1,EPB41L1,ERBB2,ERBB3,FBXO5,FJX1,GADD45A,GATA4,GJB2,HMMR,HSD17B8,ID2,IGFBP2,INSIG1,ISG15,ITGB1BP1,KIF2C,let-7,LGALS3BP,LIMCH1,MAPK8IP3,MCAM,MCM2,MCM3,MCM5,MIA3,MT1E,MT1F,MT1X,MYB,NCAPH,NDC80,NEDD9,NKX2-5,NMB,NOL3,PBK,PDE3B,PIR,PLS3,POLB,PRLR,PSD3,REEP1,SAT1,SMARCA2,SMOX,SNRPD…	2070 (18)
kainic acid		chemical toxicant	Activated	3.34	5.45469	3.51e-06	APOE,APOLD1,APP,ARNT,ATF3,BCL2,BCL2L1,BDNF,BIRC5,BMP4,BTG2,CCL3L3,CCND1,CCNE1,CD200,CD44,CEBPB,CHGB,CIART,CNR1,CREM,CSF1R,CSRNP1,DUSP1,E2F1,EGFR,EGR1,EGR2,EGR3,ERRFI1,FGF2,FGFR3,FN1,FOS,FOSL1,FOSL2,GABRA5,GABRB2,GADD45B,GAP43,GDNF,GPR19,GRIA3,GRIK4,HBEGF,HOMER1,HYOU1,IGF1,IL18,IL1B,IL6,JUN,JUNB,LEF1,LMO1,LMO2,MMP7,MPO,NFKBID,NPAS4,NR3C1,NTRK2,PLAT,PLAU,PLAUR,PNOC,PTGES,RET,RGS2,SDC1,SLC39A4,SOX9,…	1919 (21)
MAP2K3	1.124	kinase	Activated	3.335	3.67985	0.000209	ARL1,CDKN1A,COL1A1,CXCL10,CXCL8,CXCL9,DDIT3,ICAM1,IFNG,IL10,IL12A,IL12B,IL1B,IL4,IL6,IRF9,ISG15,IVL,MYH6,MYH7,NFATC1,OSCAR,PLAU,PRDX6,RAB34,SERPINE1,SGK1,SLC1A3,SLC5A5,STAT1,TNF,TNFSF10,VEGFA	1806 (17)
abemaciclib		chemical drug	Activated	3.332	7.0511	8.89e-08	ABHD15,AGRN,APOD,CDK6,CEACAM1,CPE,GAS6,GDF15,HBEGF,ISG15,LAMA3,LAMC1,LIF,LYNX1,MFGE8,MR1,NTN1,PLA2G15,PLAT,PLTP,PLXNB1,TSKU,VGF,VWCE
phorbol esters		chemical - other	Activated	3.329	2.89279	0.00128	ANXA1,APP,B2M,CD44,CDH2,CXCL8,DUSP1,DUSP2,EGR1,FOS,GRK4,HOXA5,IFNG,IL10,IL1B,IL1R1,IL2RA,IL4,IL6,ITGAD,ITGAM,IVL,JUN,JUNB,LIF,OSM,PDGFA,PLAT,PLAU,PRKCA,PRKCB,PTPRO,REL,SCG2,TIMP1,TNF,TNFSF10,VDR	1749 (16)
CREBBP	1.26	transcription regulator	Activated	3.324	24.219	6.04e-25	ACOXL,ADORA2A,AKAP12,AR,ARHGAP24,ARHGEF10L,ARHGEF3,ARID5A,ATF6,AXL,B2M,BANK1,BCL2,BCL6,BIRC5,CA2,CAMK1G,CAMK2D,CAPG,CCL3,CCND1,CCND2,CCR5,CCR7,CD160,CD44,CD80,CDC42EP3,CDCP1,CDKN1A,CEBPA,CKB,CLASP2,CNN3,COL2A1,CORO2B,CRIM1,CRYBB2,CSF1,CXCL10,CXCL12,CXCL8,CXCL9,CXCR3,CXCR4,DHFR,DHRS3,DNAJB4,DTX1,DUSP1,EDARADD,EGFR,EGR1,EGR2,EGR3,EHHADH,EOMES,EPO,EPSTI1,ESAM,EVI2A,EVL,EXOC2,EYA2,FGF2,FGFR3,FNDC3B,F…	2176 (17)
LDL		complex	Activated	3.319	15.8125	1.54e-16	ABCA1,ABCG1,ADCY1,AKAP1,APOE,ATF3,ATF6,AXL,BCL2,BCL2A1,BCL2L1,BCL2L11,C3,CAPN2,CASP1,CASP10,CASP6,CBS/LOC102724560,CCL2,CCL20,CCL3,CCL4,CCND1,CCR2,CCR7,CD36,CD40,CD68,CD80,CDK1,CDKN1A,CETP,CLIP2,CREM,CSF2,CX3CR1,CXCL10,CXCL13,CXCL2,CXCL3,CXCL8,CYP2J2,DDIT3,DLL4,DNMT1,DUSP1,DUSP2,ECE1,EDNRB,EGR1,EGR3,EMB,ERBB2,FCGR2B,FOS,G0S2,GAS6,GCLC,GCLM,GNAI1,GPR183,GPX1,HSP90B1,HSPA5,HYOU1,ICAM1,ID1,IDO1,IFIT…	1976 (13)
OICR-9429		chemical reagent	Activated	3.309	5.41229	3.87e-06	AURKA,BIRC5,CCNA2,CCNB1,CCNE2,CDK1,E2F1,FOXM1,MCM2,PLK1,XRCC2
PLG	1.285	peptidase	Activated	3.308	3.63078	0.000234	BDNF,CAV1,CCL2,CD40,CLEC7A,COL1A1,COLEC12,CSF1,CYP2S1,EDN1,EDNRB,FCGR2B,FYN,IFNG,IL1A,IL1B,IL6,IQSEC1,MCOLN3,MERTK,MFGE8,MXI1,NOD1,PECAM1,PLAU,PRKAR2B,PRKCE,RAB5A,RAPGEF3,RLBP1,SERPINE1,STAB2,TNF,TNFRSF11B,TNFSF11	1303 (17)
EGF	-2.033	growth factor	Activated	3.297	17.8125	1.54e-18	ABCG2,ACOT2,ACTN1,ADA,AIDA,AKT1,ALCAM,AMIGO1,ANGPTL4,AQP3,AR,ARL14,ARTN,ATF3,AURKA,AURKB,B4GALT1,BBC3,BCL2,BCL2L1,BIRC2,BIRC5,BRCA1,BRIX1,BTG2,CASP1,CAV1,CCL2,CCL20,CCNB1,CCND1,CCND2,CCNE1,CD274,CD34,CD44,CDC25C,CDC34,CDK1,CDKN1A,CEBPB,CEBPD,CHGB,CIBAR1,CISH,CKS2,CLCNKA,CLU,COL1A1,CPB2,CREM,CSF1R,CSPG4,CTCF,CTSD,CUTALP,CXCL13,CXCL14,CXCL2,CXCL8,CXCR3,CXCR4,CYP1A1,DAD1,DDIT3,DGKD,DPP4,DUSP1,DUSP5,…	2710 (19)
cyclic AMP		chemical - endogenous mammalian	Activated	3.296	4.54516	2.85e-05	ABCA1,ACHE,ACTA2,ANTXR2,APP,ASMT,ASS1,BCL2,BDNF,CA2,CACNA1H,CCL2,CCND1,CCND2,CD80,CD86,CDH2,CDKN1A,CEBPA,CEBPB,CEBPD,CHGA,CREB1,CREM,CRYM,CYP17A1,CYP19A1,DDIT3,E2F1,EGR1,EGR2,EPCAM,ERBB2,ESRRA,FGF2,FLT1,FMR1,FN1,FOS,FOSL2,GAP43,GATA3,GATA4,GCH1,GCK,GTF3A,HBEGF,HSD17B11,IFNG,IGF1,IGFBP4,IGFBP5,IL10,IL15,IL1B,IL1RN,IL2RA,IL4,IL6,JUN,JUNB,KCNJ13,KIF23,LGALS3BP,MEST,MITF,MYLK,NFATC1,NOS1,NR5A1,OAT,PD…	1808 (18)
TNK1	-1.667	kinase	Activated	3.293	3.76195	0.000173	APP,IFI16,IFIH1,IFIT2,IL10,IL6,IRF7,ISG20,OAS2,TLR8,TLR9,TNFSF10	815 (11)
MRGPRX3	-1.023	G-protein coupled receptor	Activated	3.286	7.75945	1.74e-08	CCL20,CCL3L3,CCL4,CCR1,CCRL2,CD274,CLEC7A,CSF3,CSF3R,CSTA,CXCL10,CXCL3,CXCR2,CXCR4,DHRS9,HCAR2,IL18RAP,IL1A,IL1B,IL1RN,IL36G,MGAM,NFKBID,OSM,S100A9,SELL,SLFN12L,TAGAP,TNF,TNFRSF1B
TASL	-1.65	enzyme	Activated	3.277	7.48812	3.25e-08	BCL2A1,CCL2,CD274,CXCL8,DNAAF1,EPSTI1,GBP4,GBP5,IFIT1,IFIT2,IFIT3,IFIT5,IL6,ISG20,OASL,SLAMF7,TNF,TNFAIP6,USP18,VCAM1	680 (9)
MAPK14	-1.048	kinase	Activated	3.274	8.62709	2.36e-09	ABCA1,ACP5,ACTA2,ALOX5AP,ATF2,ATF3,ATP2B4,AXIN2,BCL2,BTG2,CALR,CCL2,CCL25,CCNA2,CCNB1,CCND1,CCR7,CD36,CD40,CD80,CD83,CD86,CEBPD,COL1A1,CXCL10,CXCL2,CXCL3,CXCL8,CYP51A1,DNMT3A,DUSP1,EFNA1,EGFR,EPO,EREG,FLT1,FN1,FOS,FOSL2,GADD45A,GREM1,GRIN2A,HLA-DQA1,HSPA12B,ICAM1,IFNG,IL10,IL12A,IL12B,IL13,IL18,IL1B,IL27,IL4,IL6,ITGB8,IVL,JUN,JUNB,LEF1,LRP6,MAP2K6,MAPK11,MEF2C,MYH11,MYH6,NFATC1,PECAM1,PLAU,PLAUR,…	2089 (17)
CD40	1.788	transmembrane receptor	Activated	3.27	15.1931	6.41e-16	A4GALT,AICDA,AIMP2,APOBEC3G,ATP6V0E1,ATP6V1A,BCL2,BCL2A1,BCL2L1,BCL2L11,BCL6,BIK,BIRC3,BIRC5,BYSL,CALR,CCL2,CCL22,CCL3,CCL4,CCNA2,CCND1,CCND2,CD22,CD27,CD38,CD40,CD44,CD69,CD80,CD83,CD86,CDK6,CDKN1A,CLEC2D,CNR2,COX17,CR2,CSF1,CSF3,CX3CL1,CXCL10,CXCL12,CXCL8,CYSLTR1,DCTPP1,DUSP1,DUSP2,EDEM1,ERN1,EXOSC5,FAIM,FCER2,FCGR2B,FOS,GAPDH,GFPT1,GLS,GRWD1,GZMB,HLA-DQB1,HSH2D,HSP90B1,HSPA5,HSPD1,HSPE1,ICAM1,…	1509 (11)
TSLP	21.403	cytokine	Activated	3.265	3.82681	0.000149	ABCA1,CCR7,CD40,CD80,CD83,CD86,CISH,CSF2,CXCL8,CXCL9,ICAM1,IL10,IL12B,IL13,IL2RA,IL32,IL4,IL6,JAK1,JAK2,KLF4,KRT5,MKI67,MX1,NME1,PAX9,SELL,SOX2,SQSTM1,TIMP1,TNFSF4,TP63,VEGFA	1359 (16)
QKI	1.045	other	Activated	3.263	6.03012	9.33e-07	C1R,CAV1,CD36,CHGB,CLEC4M,CNN1,CSF1R,CTSS,CYP51A1,DACT1,DHCR7,EGFR,FYN,GPM6B,HIP1,HLA-DQA1,HLA-DQB1,HNRNPF,HSD17B7,ID1,ITGAM,ITGAX,ITGB8,LAMP2,LAMP3,LSS,MAP1B,MSMO1,MVD,MYH7,NOS1,NOTCH1,PEA15,PMVK,PTPRO,RAB5A,SCD,SNX2,SOX2,TAP1,THBS4,TM7SF2,TUBB2B,VCAM1,VIM	1640 (13)
BRCA1	-1.312	transcription regulator	Activated	3.259	8.41794	3.82e-09	ANXA8/ANXA8L1,AR,BCL2,BCL2L1,BIRC5,BRCA1,CASR,CCNB1,CCNB2,CCND1,CCNE1,CCNG1,CDC25C,CDKN1A,COL18A1,CTSD,CYP19A1,CYP1A1,CYP1B1,DDB2,DDIT3,DUSP3,E2F3,EGFR,EGR1,ENPP2,EZR,FHL2,FOXO1,GADD45A,GADD45B,GDF15,H2AX,H3-3A/H3-3B,HMGA2,HNRNPD,HSD11B2,IFI27,IFI6,IFIT1,IFIT2,IFIT3,IFITM1,IRF7,JAK1,KLK3,KRT5,LAMA3,MAD2L1,MATN4,MDM2,MX1,NEDD9,NEK2,NOS3,NOTCH1,NQO1,NR3C1,PERP,PLK1,PLSCR1,PLTP,POU2F1,RB1,RBL1,ROBO1…	2216 (22)
PRKCE	-2.48	kinase	Activated	3.24	6.95468	1.11e-07	ABCB1,ACTA2,APP,BCL2,BCL2L1,BIRC3,BIRC5,CAV1,CCND1,CCNE1,CD55,CDKN1A,CDON,CEBPB,CHRNA6,CSF2,CSF3,CXCL8,DLG4,E2F1,EGFR,EGR1,FOS,HSPA5,IL1B,IL2RA,IL2RB,IL6,IL6ST,IVL,JUN,JUNB,PDGFA,POMC,PRKCE,PRKD1,RGS2,STAR,STAT3,SYP,TNF,VCAM1,VEGFA	1834 (18)
RBL2	1.117	other	Activated	3.233	5.9393	1.15e-06	AURKA,AURKB,BCL2L11,BRCA1,BUB1B,CAMKK2,CASP4,CASP6,CCNA2,CCNB1,CCNB2,CCND1,CCNE1,CCNF,CDC25C,CDK1,CDKN1A,CDT1,CRADD,DHFR,DNMT1,DUSP10,E2F1,ELK1,FGFR1,HADH,IVL,KIFC1,KLF10,KPNA2,MAP3K14,NEK2,PA2G4,PCSK7,PFAS,PLK1,RANBP1,RB1,RBL1,RRM2,SFRP1,STMN1,TEAD4,TERT,TNF,TP73,TRAF5,UCK2,VEGFA,XPC	1402 (15)
PTHLH	2.817	other	Activated	3.232	2.68194	0.00208	ADAMTS7,AR,BCL2,BCL2L1,CCND1,CDC25B,CDK1,CDKN1A,CDKN2B,CDKN2D,COL2A1,CXCL8,EFNB2,FN1,FOS,FOSL2,GPX1,IGF1,IL6,ITGA6,IVL,LEF1,PLAU,RGS2,RUNX1,RUNX2,SERPINE1,SMPD3,SOD1,SOX9,TNFRSF11B,TNFSF11,VDR,VEGFA	1972 (22)
MAPK11	1.31	kinase	Activated	3.228	2.44612	0.00358	ACP5,BCL2,CALR,CAV1,CHGA,FOS,IL10,IL12B,IL6,MYH6,NPR1,PRDX1,SLC5A5,TBX21,TIMP1,VDR	1983 (18)
TNFSF15	10.988	cytokine	Activated	3.221	3.9431	0.000114	ABCG1,ACTA2,BIRC3,CCR7,CD40,CD80,CD83,CD86,CSF2,CXCL2,CXCL8,GZMB,HAMP,IFNG,IL13,IL17A,IL2RA,IL2RB,IL4,IL6,TBX21,TNF	1686 (14)
GATA2	1.231	transcription regulator	Activated	3.218	7.75449	1.76e-08	ACHE,ADGRE5,ADGRG1,ALOX5,ANGPT2,AQP9,AR,ARHGEF5,CCL2,CCL3L3,CCND1,CCR2,CCR3,CCR8,CD226,CD34,CD36,CD40,CD69,CD96,CDK6,CDKN1A,CEBPA,CEL,CELSR3,CHGA,CHI3L1,CLNK,CMA1,CSF1R,CSTA,CX3CL1,CXCL10,CXCL12,CXCL2,CXCR4,DDIT4L,DDX4,E2F2,EDN1,EDNRA,EPO,EPOR,ETS1,EVI5,F13A1,F2R,FCHO1,FCRLA,FOXP1,FUT7,GATA3,GBP2,GDA,GFI1,GIMAP8,GP1BB,GPR141,GPR65,GRAP2,GREM1,HEMGN,HHEX,HOXA10,HSD17B1,ICAM1,ICAM4,ICOS,IGFBP7,IKZF…	2417 (21)
cadmium		chemical toxicant	Activated	3.206	1.37882	0.0418	B2M,BCL2L1,BCO1,C3,CCND1,CDKN1A,CHPT1,CYB5A,CYP1A1,EPO,ESR2,GNS,HLA-DQB1,HSPA5,IGF2R,IL4,ITPR1,JUN,LGALS3,LOX,PECR,PLAU,RBP1,SERPINF1,SGK1,SLC39A8,TIMP1
TNFSF13	1.15	cytokine	Activated	3.202	1.48413	0.0328	AICDA,BCL2,BCL2L1,BCL2L11,BCL6,CCND2,CDK6,CSF2,HOXC4,MCM2,MCM5,MCM6,POLE2,PRDM1,RB1,XBP1
PARP9	1.703	enzyme	Activated	3.192	6.52288	3e-07	AKT3,BCL6,HLA-DOB,HLA-DQA1,HLA-DQB1,HLA-E,IFI44,IFIT1,IFIT2,IFIT3,IRF1,IRF7,ISG15,NCF1C,OAS2,RBMS1,SP110,STAT1	828 (13)
IL17F	-5.094	cytokine	Activated	3.192	2.45346	0.00352	CCL2,CCL20,COL2A1,CSF2,CSF3,CX3CL1,CXCL10,CXCL2,CXCL3,CXCL8,CXCR4,ICAM1,IFNG,IGF1,IL32,IL6,PLA2G4E,RUNX2,S100A9,TNFRSF1B	1629 (12)
nickel		chemical toxicant	Activated	3.19	3.03198	0.000929	CD80,CD86,CXCL8,FGF2,FOS,GAPDH,ICAM1,IL1RN,JUN,NUPR1,PLAT,POU5F1,SERPINE1,TSLP	1780 (15)
TERT	-3.339	enzyme	Activated	3.183	13.0731	8.45e-14	AR,ASAP1,ATF3,B2M,BIRC5,BNIP3,CALU,CAV1,CCL1,CCL2,CCND1,CCNE1,CD24,CDH2,CDKN1A,CHEK1,CSF1,CSF2,CX3CL1,CXCL10,CXCL13,CXCL2,CXCL8,EGFR,EIF5A2,ELK3,EREG,ETS1,F2R,FAM167A,FGF2,FRMD6,FUT4,GNA13,HDHD5,HMGB1,ICAM1,IFI16,IFI27,IFI35,IFI44,IFIH1,IFIT1,IFIT2,IFIT3,IFITM3,IFNG,IGFBP4,IL10,IL13,IL17A,IL1B,IL4,IL6,IRF7,ISG15,ISG20,JUP,KLF4,KLK3,KRT18,LIPG,MFGE8,MX1,NFKBIA,NOS3,OAS1,OAS2,OASL,PALM2AKAP2,PAX6,P…	1558 (20)
H2AB3 (includes others)	-49.882	other	Activated	3.182	7.284	5.2e-08	AQP3,ATF3,ATF5,BBC3,BCL2L10,BCL2L11,BIK,BLK,CDKN1A,CDKN1C,CHAC1,CLCNKA,DHRS2,DHRS9,EFNA1,FOS,GMFG,HIP1R,ICAM5,IL13,JAK3,LIPH,LMO1,MSX1,NKX3-1,SAA2,SERPINB9,SLC29A3,SLC30A3,TMEM151B,TNFRSF8,TNFRSF9	874 (8)
fulvestrant		chemical drug	Activated	3.174	19.8962	1.27e-20	ADCY9,ADRB1,ADRB2,AURKA,AXL,BARD1,BCL2,BIK,BIRC5,BLM,BMP4,BMPR2,C3,CASP4,CAV1,CBS/LOC102724560,CCDC34,CCDC80,CCL2,CCNA2,CCNB1,CCND1,CCNE1,CDC20,CDC25B,CDK1,CDKN1A,CDKN2C,CEBPD,CENPF,CENPX,CHAF1A,CKS1B,CRYZ,CSF1,CTH,CTSD,CUZD1,CXCL10,CXCL12,CYP17A1,CYP19A1,E2F1,EGFR,EGR1,EGR3,EPOR,ERBB3,ESR2,ESRRA,F2R,FKBP1A,FLT1,FOS,FOSL2,FOXM1,GAB2,GABPA,GADD45A,GHR,GJB2,GTSE1,GUCY1A1,GUCY1B1,H2AX,H2AZ1,HAMP,HES…	2359 (22)
PF4		cytokine	Activated	3.163	11.3925	4.05e-12	ACTA2,BIRC3,CCL2,CCL22,CCL3,CCL4,CD1A,CD1C,CD83,CD86,CDKN1A,CEBPA,CNN1,CXCL3,CXCL8,DDX60,E2F2,EPSTI1,ETV4,FLI1,FN1,GCH1,ICAM1,IFNG,IL12B,IL17A,IL19,IL1A,IL1B,IL1RN,IL23A,IL6,IRF1,ISG15,ITGAM,KLF4,LY75,NFKB2,NFKBIA,NFKBIZ,REL,RSAD2,SOX2,SPHK1,STAT1,STAT2,TFDP1,THBD,TNF,TNFAIP3,USP18,VDR	1496 (16)
PHF12	1.057	transcription regulator	Activated	3.162	0.436519	0.366	BRIX1,GTPBP10,H2AX,IMP4,PA2G4,RRP9,RRS1,SMN1/SMN2,TFB2M,UTP20
CTNNB1	1.015	transcription regulator	Activated	3.16	15.7375	1.83e-16	ABCB1,ABHD12B,ACADVL,ACAT1,ACTA2,ADGRG2,ADSS2,AGRN,AHR,AICDA,AKAP13,ALCAM,AMIGO1,ANXA1,APOD,APP,AR,ARFGAP3,ARHGDIA,ARL4A,ASRGL1,ATP6V0A1,AURKA,AXIN2,BAMBI,BBC3,BCL2,BCL2L1,BCL2L10,BCL2L11,BCS1L,BDNF,BIRC5,BMF,BMP1,BMP4,BRMS1L,BTG3-AS1,CADM1,CALM1 (includes others),CCL2,CCL22,CCL3,CCL4,CCNA2,CCND1,CCND2,CCNE1,CCNE2,CCRL2,CD274,CD34,CD36,CD4,CD44,CD99,CDH2,CDKN1A,CDKN2B,CDKN2D,CEACAM1,CEBPA,CEMIP2,…	1953 (17)
phytohemagglutinin		chemical drug	Activated	3.151	12.752	1.77e-13	AFF1,AIF1,AMFR,ANOS1,APOC2,APP,ARSB,BCL3,BCR,BTG1,CACNB2,CALU,CCL1,CCL2,CCL3,CCL3L1,CCL4,CCND2,CCNH,CCR2,CCR7,CD44,CD69,CD83,CGAS,CHAF1B,CLCN4,CLIC2,COL18A1,COL4A5,CRABP1,CSF1,CXCL10,CXCL12,CXCL8,CXCR4,DHX9,DNAJB2,DXO,EGR1,ENG,ENPEP,FGFR3,FOS,FOSL2,GAB2,GATA3,GCLC,GJA4,GNAI1,GNAT1,GNRH1,GPD1,GPD2,GPLD1,GUCY1B1,GYS1,GZMB,HSP90AA1,ICAM1,IFNG,IL10,IL12RB2,IL13,IL15RA,IL1B,IL1R2,IL24,IL2RA,IL4,IL6,IL…	1808 (14)
PIK3R1	1.396	kinase	Activated	3.15	8.83268	1.47e-09	ACTA2,AR,ATF5,BCL2,BCL2L1,CCL3,CCL4,CCND1,CCND2,CD36,CD44,CXCL10,CXCL12,CXCL8,DDIT3,DNAJB9,DNAJC3,ENG,ERBB3,ERN1,FOS,FOXO1,GCH1,HSP90B1,HSPA5,ICAM1,IFNG,IL12A,IL12B,IL1B,IL6,IRF7,ISG15,MITF,MKI67,NEUROG3,NFE2L1,PDGFRA,PDGFRB,PDK1,PIK3R1,PLAU,PPARG,SERPINE1,SLC5A5,TGFB3,TNF,VCAM1,VEGFA,XBP1	2041 (17)
cytarabine		chemical drug	Activated	3.15	7.78516	1.64e-08	ADGRE5,BBC3,BCL2,BCL2L11,CCL3L3,CCNB1,CD180,CD274,CD40,CD55,CD69,CD80,CD86,CDK1,CDKN1A,FDXR,GADD45A,GAPDH,GZMB,HLA-A,ICAM1,IL1B,IL4,IL6,ITPR2,LTB,MCC,MCL1,MDM2,POU5F1,SESN1,SESN2,TGFB3,THRA,TLR2,TNF,TNFRSF10B,TNFRSF13C,TOP2A,TRIAP1	1123 (15)
CD3 group		group	Activated	3.147	4.74715	1.79e-05	CBLB,CCNE1,EGR2,FOXP3,FYN,GATA3,GBP2,GLS2,HAVCR2,IFNG,IL10,IL13,IL17A,IL1B,IL27,IL2RA,IL4,KLF2,LPCAT4,MBOAT1,PDCD1,PLA2G4A,PLA2G4C,PLA2G6,SCD,STAT3,TBX21,TFRC,TNF	1574 (17)
PARP1	-1.22	enzyme	Activated	3.138	9.65956	2.19e-10	ABCA1,ATXN10,BCL2,CASP4,CCL1,CCL4,CCND1,CCR2,CCR5,CD274,CD80,CD83,CD86,CDKN1A,COL1A1,CSF2,CXCL10,CXCL12,CXCL13,CXCL3,CXCL8,CXCR2,DNAJC12,E2F1,ECE1,EGFR,ERBB2,FOS,FOXP3,GBP2,GBP4,GBP6,GDF15,HES1,ICAM1,IFNG,IGF1,IL10,IL12B,IL17A,IL18BP,IL1B,IL23R,IL2RA,IL4,IL6,ITPR1,JUN,LGALS3BP,LIF,MDM2,MITF,NOTCH3,PDCD1,PEG10,POU2F1,RB1,SDK1,SMAD3,SNAI1,SOCS1,SOCS2,STAT1,TBX21,TIMP1,TLR4,TLR9,TMSB15A,TNF,TNFRSF10…	1768 (13)
RNF138	1.061	enzyme	Activated	3.137	8.06298	8.65e-09	BCL2L1,BIRC3,CACNA1A,CCL20,CCND2,CCR7,GADD45B,ICAM1,IER3,IL10,IL1A,IL6,LRRC32,NAMPT,NFKB2,PLK3,RGS16,SH2D5,SPECC1,TNF	958 (15)
DOCK8	-1.023	other	Activated	3.13	10.5058	3.12e-11	ARID5A,BBX,CCL4,CCND2,CD40,CITED2,CXCL10,EDN1,FGL2,HDAC1,HELZ2,IFIT2,IFIT3,IL10,IL12B,IL15,IL15RA,IL18,IL6,IRF1,IRF7,ISG15,ISG20,LMO4,LTA,MERTK,NFKBIZ,NMI,PLA1A,PLAT,RBL1,REL,RGS1,RILPL1,RSAD2,SH3BP5,SLCO3A1,SLFN12L,SOCS1,STAT1,STAT2,TCF4,TLR3,TNF,TNFSF8	645 (6)
BMS-690514		chemical drug	Activated	3.128	6.61979	2.4e-07	BBC3,BCL2L11,BRCA1,CCNB1,CCND1,CDK1,CDKN1C,DDIT3,DNAJB6,DNAJC9,HSP90AA1,HSPA8,HSPE1,MCL1,MCM10,MCM3,MCM5,MCM6,MCM7,PPARA,PPARG,TP53RK,TP53TG1	1916 (12)
PRKCB	1.875	kinase	Activated	3.121	1.59007	0.0257	ADRB1,APP,BCL2L1,CCND1,CD40,CD80,CD83,CD86,CDKN1A,EGR1,FGF2,FN1,FOS,FOXO1,GCK,ICAM1,IGF1,IL10,IL6,JUN,MYH7,MYLPF,PPP1R3C,PRKCB,SERPINE1,TCIRG1
hyaluronic acid		chemical - endogenous mammalian	Activated	3.102	7.29671	5.05e-08	ABCB1,ACKR3,BCL2,BCL2L1,BCL3,BIRC5,CCL3L3,CCL4,CCR7,CD40,CD44,CD80,CD83,CD86,COL2A1,COL6A2,CSF1R,CTTN,CXCL10,CXCL2,CXCL3,CXCL8,CXCR4,DEFB4A/DEFB4B,ERBB2,FN1,FOS,FOXP3,FRK,HMMR,ICAM1,IL10,IL12B,IL1B,IL6,IRAK3,IRF5,JUN,LY96,MPO,NCF1,NFKBIA,PLAU,PPARG,PTGES,PTHLH,PTPRC,RHOC,SERPINE1,SOCS3,SOX9,SPHK1,TIMP1,TLR2,TLR4,TNF,TNFAIP3,TNFSF14,VCAM1	1839 (12)
hemozoin		chemical - endogenous non-mammalian	Activated	3.085	5.7122	1.94e-06	CCL2,CCL3,CCL3L3,CCL4,CCR1,CCR2,CCR5,CD80,CD83,CXCL2,CXCL3,CXCR2,CXCR4,ICAM1,IL10,IL1A,IL1B,IL6,S100A9,TNF	1215 (12)
ARVib-7		chemical reagent	Activated	3.084	10.3788	4.18e-11	AKT1,AR,BIRC5,BRCA1,BUB1B,CCNA2,CCND1,CDC25B,CDC25C,CDCA5,CENPE,DHDDS,ESPL1,KDM1A,KIF15,KIF22,KIF2C,KLK2,KLK3,KPNA2,MAD2L1,MAK,NKX3-1,NRIP1,NUSAP1,PA2G4,PATZ1,PKMYT1,PLK1,PRDX1,PRKDC,PTK2B,TCF4,TMPRSS2,TPX2,UBE2C,ZMIZ1,ZWINT	1596 (7)
ARVib-31		chemical reagent	Activated	3.084	10.3788	4.18e-11	AKT1,AR,BIRC5,BRCA1,BUB1B,CCNA2,CCND1,CDC25B,CDC25C,CDCA5,CENPE,DHDDS,ESPL1,KDM1A,KIF15,KIF22,KIF2C,KLK2,KLK3,KPNA2,MAD2L1,MAK,NKX3-1,NRIP1,NUSAP1,PA2G4,PATZ1,PKMYT1,PLK1,PRDX1,PRKDC,PTK2B,TCF4,TMPRSS2,TPX2,UBE2C,ZMIZ1,ZWINT
VAV1	1.056	transcription regulator	Activated	3.084	1.73518	0.0184	BCL2,BCL2A1,CCND1,CCND2,CD69,ELK1,FOS,IFNG,IL4,IL6,JUN,REL,TNF,VEGFA
EGR2	1.42	transcription regulator	Activated	3.083	10.6676	2.15e-11	ACVR1,ASS1,BCL2,BCL2L11,BCL6,BNIP3L,CBLB,CCL1,CDKN1A,CEBPB,CRABP1,CSF1R,CYP19A1,CYP51A1,DDN,DHCR7,DLG3,EGR1,EGR2,EPHA4,ERBB2,FCER2,FGF2,FLOT2,FOS,GATA3,GHR,GOLGB1,GRIN2A,HOMER1,HOXB3,HSPA5,ID2,ID3,IFNG,IGF2BP1,IL10,IL17A,IL1A,IL1B,IL1R2,IL4,IL6R,IL7R,ITGAE,JUN,LAG3,LAMA2,LTBP3,MAP2,mir-25,MR1,MYB,NCL,NOTCH1,NSF,NXPH4,PASK,PCDHGC3,PLCL1,PPT2,PRDM1,PRX,PTHLH,ROBO1,RORA,RRAD,SCD,SLC1A3,SMAD1,SOCS1,S…	1906 (16)
PRKCA	-11.345	kinase	Activated	3.076	12.2343	5.83e-13	APOBEC3G,APOM,APP,ARHGDIB,ARL4C,BCL11A,BCL2L1,BNIP3L,CAV1,CCL2,CCND1,CCNE1,CD55,CDKN1A,CIITA,COL1A1,CSF2,CSF3,CSTA,CTSB,CXCL10,CXCL2,CXCL3,DIAPH1,DTX1,EGR1,ERBB2,ETS1,FN1,FOS,FOXO1,GDF15,HES1,HEY1,HS2ST1,ICAM1,ID1,ID2,ID3,IFIT1,IFIT3,IFNG,IL17A,INSIG1,IVL,JUN,LAMP2,MYLPF,NFKBIA,NOTCH4,NQO1,OASL,PEG10,PHLDA2,PLA2G6,PLD1,PTPRN2,PVR,RB1,RHOBTB3,RSAD2,RUNX1,RUNX2,S100A9,SERPINE1,SP100,STAR,TNF,TRPC1,…	1473 (13)
TRPS1	38.489	transcription regulator	Activated	3.076	5.4034	3.95e-06	ACSL1,AURKB,CCNA2,CCNB2,CDC20,CDC25C,CDK1,CENPF,DPEP2,ENPP6,FN1,FOXM1,GALNT3,GPR141,KCNMA1,KIF11,NOTCH2,PACSIN1,RUNX1,RUNX2,SEMA6A,SERPING1,SMPD3,SNAI1,SOX2,SPC25,TOP2A,TPX2,VDR	1958 (14)
bleomycin		biologic drug	Activated	3.064	17.2807	5.24e-18	ACKR3,ACTA2,AKT1,ALKBH8,ANGPT2,APOE,ARRDC3,ATF3,B3GNT7,BCL2,BCL2L1,BLM,BMP1,BMP4,BMPR2,BRMS1L,C3,CCL2,CCL22,CCL3L3,CCND2,CCR1,CCR2,CCR5,CD300LF,CD68,CD86,CDC25B,CDH17,CDKN1A,CEBPA,CHI3L1,CIART,COL1A1,CSF2RB,CSF3,CTSD,CTSS,CXCL10,CXCL12,CXCL2,CXCL3,CXCR4,DUSP5,EGFR,EPHA2,F2R,FCRL5,FGFR1,FN1,FOSL1,FZD1,GAB1,GAB2,GADD45A,GDF15,GFI1,GOLGA1,GPR34,H2AX,HBEGF,HEY1,HSP90AA1,ICAM1,ID1,IFIT2,IFNG,IGF1,IL10…	2248 (15)
Rb		group	Activated	3.054	5.68403	2.07e-06	ARX,AURKB,BIRC5,CCL2,CCNA2,CCNB1,CCND1,CCNE1,CCNE2,CDCA3,CDK1,CDKN1A,CDT1,CYP1A1,DHFR,DLX1,DNMT1,DUSP10,E2F1,E2F2,ECT2,EPO,FOXM1,GMNN,HDAC1,HERC5,MAD2L1,MCM3,MCM5,MCM7,mir-29,PA2G4,PCYT1A,PLK1,POLE,RBBP8,RBL1,ROBO3,SLC5A5,TERT,TOP2A,TP73	1582 (16)
NOD2	1.162	other	Activated	3.053	6.00877	9.8e-07	ACSL1,AXIN2,BCL2A1,CCL2,CCL3,CD40,CXCL10,CXCL2,CXCL3,CXCL8,DEFB4A/DEFB4B,ICAM1,IER3,IFNG,IL10,IL12B,IL17A,IL18,IL1A,IL1B,IL23A,IL27,IL6,ITGAM,KLF2,LMO4,MARCKSL1,MCOLN2,NFKB2,NFKBIA,PDE4B,PTGES,RASGRP1,RASGRP3,SOCS3,TNF,TNFAIP3,TNFRSF9,TNFSF11,TRAF1	1218 (17)
tetrabromobisphenol A		chemical toxicant	Activated	3.053	5.18376	6.55e-06	AKT1,CCL2,CCL3,CCR2,CEBPB,COL15A1,COL1A1,COL6A1,ENG,GREM1,IFNG,IL13,IL4,ITGA1,ITGA2,ITGA3,ITGB3,ITGB5,JUN,LOX,PDGFB,SERPINH1,SMAD3,SMAD7,SNAI1,TGFB3,THBS1,THBS2,TIMP1,TNF,VEGFA	2065 (21)
GNRH1	-1.45	other	Activated	3.053	1.94692	0.0113	APP,CREM,CYP17A1,CYP19A1,EGR1,EGR2,FOS,GNAQ,GNRH1,HSD11B1,IGF1,IGFBP5,IL1B,IL2RA,JUN,JUNB,KISS1R,MCM3,NES,NOS1,NR5A1,PLAT,PPP1R9B,PPP3CA,PRKCE,PRL
ADORA3	-1.356	G-protein coupled receptor	Activated	3.051	3.1891	0.000647	CCL1,CCL2,CCL3,CCL4,CSF1,CSF2,CXCL3,CXCL8,HAMP,IL10,IL24,IRF1,VEGFA	1119 (17)
LHCGR	-4.479	G-protein coupled receptor	Activated	3.048	1.27246	0.0534	AR,CYP17A1,CYP19A1,EDN2,ESR2,GNRH1,HSD17B1,IGFBP4,IL1R2,INSL3,PRKG2,PRLR,PTGS1,STAR,TNFAIP6
MYOD1	-1.022	transcription regulator	Activated	3.04	16.3279	4.7e-17	ACACB,ACHE,ACTA2,ARNT,ASS1,ATP7A,BCL2,BCL2L1,BCL6,BIN1,BRCA1,BUB1B,CADPS2,CCL1,CCL2,CCNB2,CCNE1,CDC20,CDCA3,CDH15,CDK1,CDKN1A,CDKN1C,CENPE,CENPF,CEP55,CXCL14,CYP2S1,DAG1,DEPDC1,DHFR,DLGAP5,DMD,DUSP1,DYSF,E2F2,EGFR,EIF2AK2,ENPP2,ETV4,FAM83D,FOSL1,FOXM1,FYN,GADD45A,GINS2,GMFG,GYS1,HADH,HDAC11,HES6,HJURP,HSPB8,ID2,IFI16,IFIT2,IGF1,IGFBP5,IGLL1/IGLL5,ITGA7,JUNB,KIF14,KIF18B,KIF2C,KIF4A,KIFC3,KLF6,KNL…	2051 (26)
ICAM1	1.781	transmembrane receptor	Activated	3.039	5.07007	8.51e-06	ACTA2,CCL3L3,CCL4,CD69,CD80,CD86,CDH2,CXCL2,CXCL3,FOS,HES1,HEY1,ICAM1,IFNG,IL12RB2,IL17A,IL1A,IL1B,IL2RA,IL6,ITGA4,KLF4,MPO,NOTCH1,SNAI1,TNF,VCAM1,VEGFA,VIM,ZEB2	1298 (16)
Ifn gamma		complex	Activated	3.037	5.59346	2.55e-06	APOBEC3G,BCL2L1,CASP1,CCL2,CD86,CDKN1A,CHI3L1,CSE1L,CXCL10,CXCL8,CXCL9,CXCR3,EDN1,EIF2AK2,FLT1,GBP1,ICAM1,IFI44L,IGFBP4,IGFBP5,IL10,IL17RA,IL18BP,IL1B,IL32,IRF8,JAK2,LGALS9,LIF,LY96,MYH7,NLRP2,NR3C1,PPARG,PSME1,SH2D1A,SOCS1,SOCS3,STAT1,TERT,TLR3,TLR4,TNF,TNFRSF13C,TNFRSF9,TNFSF10,XAF1	1643 (14)
PRKCD	-1.081	kinase	Activated	3.032	13.5817	2.62e-14	ABCA1,ARHGAP32,ARID3B,BCL2,BCL2A1,BCL2L1,BIRC2,BIRC3,BIRC5,BNIP3,C3orf52,CCL2,CCL20,CCNA2,CCND1,CCNE1,CD4,CD68,CDKN1A,CEBPB,CIITA,COL1A1,CSF2,CTSB,CX3CL1,CXCL10,CXCL12,CXCL8,DDIT3,DENND3,EPOR,ERCC6L,ETS2,FOS,FOSL1,FOSL2,FOXP1,FZD1,GDF15,GEM,GLI1,GPRC5A,HJURP,ICAM1,ICOSLG/LOC102723996,IL10,IL12B,IL13,IL1B,IL1RN,IL23A,IL32,IL4,IL6,ITGAM,IVL,JCHAIN,JUN,JUNB,KHDC1,KIF2C,KLF6,LAMB3,LBH,LIF,LIPG,LORICR…	1418 (11)
rosiglitazone		chemical drug	Activated	3.031	11.0353	9.22e-12	ABCA1,ABCC9,ABCG1,ACADVL,ACSL1,ACSS2,ADA,ALOX5,ANGPTL4,APOE,APOL3,APOL6,AQP3,ASAH1,BCL2,BDNF,BMPR2,BRCA1,C1QTNF12,C3,C4A/C4B,CAV1,CCL15,CCL2,CCL3L3,CCND1,CCNE2,CCR2,CCRL2,CD1D,CD36,CD68,CD80,CD86,CDKN1A,CEBPA,CIDEC,CIITA,CLEC7A,COL1A1,COL6A1,CPT1B,CREB1,CSF1,CTSS,CXCL10,CXCL8,CXCL9,CYP19A1,CYP1A1,DHRS3,DOK1,EBI3,ECH1,EDN1,EDNRA,EGFR,EGLN3,EHHADH,ELOVL6,EOMES,ERP44,ETS1,FFAR1,FN1,FOS,FOSL1,GAPDH,G…	1925 (19)
forskolin		chemical toxicant	Activated	3.028	21.2418	5.73e-22	ABCA1,ACE,ACER2,ACP3,ACP5,ACTA2,ACTG2,ACTN1,ACTR2,ADAMTS16,ADAMTS4,ADCY9,ADGRG1,ADGRL2,ADM,ADORA2A,AIP,AKAP12,AKAP13,AKIP1,ALDOC,APP,AQP3,ARHGEF5,ARL4C,ARPC1A,ATF3,ATP1B1,ATP6AP2,ATP6V1A,AVPI1,AXIN2,B4GALT1,BAG3,BAMBI,BCL2,BCL2L11,BCL3,BDNF,BIRC5,BNIP3L,BTG2,CALM1 (includes others),CALR,CASP14,CASP4,CCDC85B,CCL2,CCNB1,CCNB2,CCND1,CCND2,CCR8,CD200,CD4,CD44,CD55,CD68,CD80,CD86,CD9,CDH2,CDK14,CDKN1A…	2061 (22)
RAB1B	-1.102	other	Activated	3.024	8.82391	1.5e-09	ARF4,ARL1,COPG1,CXCL8,CYTH1,GEM,GOLGA1,GOLGA2,GOLGA3,JUN,KDELR1,KDELR3,NAPA,RAB32,RABAC1,RHOBTB3,RRAGC,SEC22B,SEC24D,SEC31A,SERP1,SLC5A5,SRP54,STX3,STXBP1,USO1
camptothecin		chemical drug	Activated	3.01	34.757	1.75e-35	ABCB1,ACTA2,ADO,AEN,AK4,AKAP17A,ANXA2,ANXA4,APBB2,APOE,AR,ARFGAP1,ARHGDIA,ARL4A,ARMH3,ARRB2,ASPM,ATF3,AURKA,BAG3,BAMBI,BBC3,BCL11A,BCL2,BCL2A1,BCL2L1,BIRC2,BIRC3,BIRC5,BLK,BNIP3L,BRCA1,BTG2,BTG3,BTN3A3,C11orf68,C1orf216,CALR,CASP1,CASP14,CASP4,CCL2,CCL20,CCL3,CCNB1,CCND1,CCNE1,CCNG1,CCR1,CCRL2,CD1D,CD200,CD22,CD40,CD83,CD86,CD93,CDC42EP2,CDK1,CDK6,CDKN1A,CHAC1,CHCHD7,CHEK1,CHST11,CLN8,CLTB,CLU,CR…	1906 (14)
MIF	1.11	cytokine	Activated	3.008	8.84466	1.43e-09	ACTA2,ATF5,BCL2,BCL2L1,CCL2,CCL3L3,CCL4,CCND1,CCR1,CCR5,CCR8,CD44,CDC34,CEBPB,CHST10,COL1A1,COL4A4,CXCL10,CXCL2,CXCL3,CXCL8,CXCR4,DUSP1,F2R,FOS,GFI1,GZMB,HGF,HSD11B2,ICAM1,IFIT3,IFNG,IL10,IL12A,IL12B,IL13,IL15,IL15RA,IL17A,IL17RA,IL1B,IL1R1,IL23A,IL23R,IL2RA,IL4,IL4R,IL6,IL6ST,IL7,IL7R,IL9R,IRF7,ISG15,ITGA4,JUN,LDOC1,LTBR,MFN1,NPTX1,OAS2,OAS3,OTP,RAMP2,SQSTM1,STRA6,TIMP1,TLR4,TNF,TRIM22,USP18,VCA…	1677 (13)
GABARAP	1.266	transporter	Activated	3.004	3.72125	0.00019	ABCA2,ARSG,BLVRB,CSPG4,CSTB,CTSB,CXCR4,IDS,INSIG1,LAMB3,LGMN,NCSTN,NPC2,OPRK1,PDGFB,TPP1,TRPV1,UPP1	315 (3)
IOX2		chemical reagent	Activated	3	3.77211	0.000169	ADM,AK4,BNIP3,INSIG2,JUN,KDM3A,LOX,LOXL2,P4HA1,PDK1,PLOD2,RAB20,RYR3,SLC2A3,STC2,VLDLR
ST3-Hel2A-2		chemical reagent	Activated	3	3.70774	0.000196	ATF3,BCL6,CDKN1C,DDIT3,EGR2,FOS,GADD45A,HERPUD1,IER3	1276 (13)
VH032		chemical reagent	Activated	3	3.50446	0.000313	ADM,AK4,BNIP3,INSIG2,JUN,KDM3A,LOX,LOXL2,P4HA1,PDK1,PLOD2,RAB20,RYR3,SLC2A3,STC2,VLDLR
Ca2+		chemical - endogenous mammalian	Activated	2.993	8.7986	1.59e-09	ABCB1,ACTA2,ADORA2A,AHR,ANKH,APP,AR,ATF3,BCL2,BCL2L1,BDNF,CALR,CASP14,CASR,CCND1,CCND2,CCNE1,CCR2,CD80,CD83,CD86,CDKN1A,CEBPB,CEBPD,CHGB,COL1A1,COL2A1,CREM,CSTF2,CTTN,CXCL8,CXCR4,CYP1A1,CYP1B1,CYP27B1,DBP,DDIT3,DUSP1,E2F1,E2F2,E2F3,EDN1,EGFR,EGR1,ELF3,ELK1,FGF2,FN1,FOS,FOSL1,FOSL2,GLS,GRK5,GUCY1A2,HBEGF,HOMER1,HOXA1,HSPA5,ICAM1,ICOSLG/LOC102723996,ID1,ID3,IFNG,IL10,IL1B,IL4,IL6,IL6R,IRF1,ITGA3,IT…	2003 (15)
carrageenan		chemical drug	Activated	2.993	2.39577	0.00402	CCL3L3,CXCL2,CXCL3,CXCL8,EGR1,EGR2,FOS,FOSL1,FOSL2,GRM8,ICAM1,IL1B,IL6,JUN,JUNB,NFKBIA,NR3C1,POMC,PTGES,SELENOP,TNF,TRPM2,VEGFA	2008 (15)
ST6GAL1	-1.059	enzyme	Activated	2.987	2.21183	0.00614	BIRC3,CCND2,CDH2,CXCL8,FN1,IL6,PDK1,SLC2A3,SNAI1	1710 (16)
C5	-1.108	cytokine	Activated	2.981	8.32422	4.74e-09	ACTA2,AKT1,ATF3,ATF6,BCL2,BCL6,BCL6B,C5AR1,CCL2,CCL3,CCL3L3,CCL4,CCND1,CCNE1,CD55,CD86,CSF1,CSF2,CSF3,CXCL10,CXCL2,CXCL3,CXCL8,DAG1,EFNB2,EGR1,EIF2AK2,ERN1,FCGR2A,FCGR2B,FLT1,FN1,GDF15,HGF,HSPA5,ICAM1,IFNG,IL10,IL12A,IL12B,IL13,IL17A,IL18R1,IL1A,IL1B,IL23A,IL27,IL4,IL6,ITGAM,MPO,NFIX,NFKBIA,PLAT,PLK3,RGS3,SERPINE1,SLC25A15,SMAD7,TNF,TNFAIP2,TNFAIP3,VCAM1,VEGFA,ZFP36	1494 (14)
Creb		group	Activated	2.98	4.37366	4.23e-05	AASS,ACTA2,ACVR2B,ADM,AKT1,ALOX5,ANK3,ANKRA2,ANTXR2,ATF3,BBC3,BCAS1,BCL2,BDNF,BMP6,CASP1,CCND1,CD5L,CD80,CDKN1A,CEBPA,CEBPB,CEBPD,CHGA,CIDEC,CLMN,CREM,CSF1R,CTH,CTSB,CXCL10,CXCL8,CXXC1,CYP17A1,CYP19A1,CYP51A1,DDX28,DUSP1,EGR1,EGR3,ELL,ETV5,FHDC1,FOS,FOSL1,FSCN1,GABBR1,GABRR2,GDA,GIMAP8,GSTM3,GSTM4,HES1,HLA-G,HSPB8,IER3,IFI16,IFNG,IGF1,IL10,IL1B,IL6,ITGA10,ITGAM,IVL,JUN,JUNB,KCNA5,KPTN,LMO4,LTBP3,…	2411 (25)
SRC	-1.54	kinase	Activated	2.977	6.73049	1.86e-07	ABCA8,ABCA9,ABCB11,ABCG1,ACAT1,ATP8B1,BCL2L1,CA2,CAV1,CAVIN1,CCL2,CCND1,CCND2,CCNE1,CDK1,CDKN1A,CDON,CSF2,CSF3,CTNND1,CTSB,CXCL10,CXCL8,CYP1A1,DOK1,DUSP1,EGFR,ERBB2,F2R,FN1,FOS,FOSL1,GBP1,ICAM1,ID1,IL13,IL6,JUN,KLK3,KRT18,LAMP2,MCL1,NEUROG3,PLAT,PLAU,PLAUR,PLK1,POU5F1,PRKCA,PRKCE,PRL,SIRPA,SLC4A7,SRC,STAT3,SYNPO,TFPI2,TJP1,VCAM1,VEGFA,VIM	2111 (19)
sudemycin D6		chemical reagent	Activated	2.976	3.70774	0.000196	CSF2,ICAM1,IFI27,IFITM1,IL1B,MX1,MX2,OAS1,TNFSF10
THPO	3.629	cytokine	Activated	2.975	7.30892	4.91e-08	ACHE,AURKA,AURKB,BCL2L1,BIRC3,BIRC5,CCNA2,CCNB1,CCND1,CCND2,CCNE1,CD44,CEBPA,CIAPIN1,CISH,CTTN,DDX60,E2F2,EPSTI1,ETV4,FLI1,FOS,GCH1,HOXB4,ICAM1,IL1B,IL6,IRF1,ISG15,ITGB3,JAK2,KLF4,MDM2,mir-223,mir-26,NFKB2,NFKBIA,NFKBIZ,NOS3,REL,RSAD2,RUNX1,SOCS3,SOX2,STAT1,STAT2,TAP1,TFDP1,TNF,TNFAIP3,USP18,VDR,VEGFA	1677 (16)
daunorubicin		chemical drug	Activated	2.975	3.9431	0.000114	ABCA2,ABCA3,ABCA4,ABCA7,ABCB1,ABCC4,ABCC9,BCL2L1,CD82,CDKN1A,DPYSL4,EPS8,FOXM1,GATA4,IL1B,IL6,MCL1,MDM2,SLC25A4,TAP1	1915 (21)
PIM1	-1.02	kinase	Activated	2.973	4.97881	1.05e-05	ABCB1,ABCG2,AKT1,BBC3,BCL2,BCL2L1,CCNB1,CCND2,CD38,CD44,CDKN1A,EPHA2,ERBB2,ERBB3,FOSL1,ID2,IFNG,IGFBP5,IL10,IL12RB2,IL2RA,IL6,MDM2,NKX3-1,OSCAR,PROS1,SELL,SOCS1,STAT4,TBX21,TNFRSF18	2366 (22)
IL13	4.055	cytokine	Activated	2.97	18.5607	2.75e-19	ABCA1,ACADVL,ACKR3,ACSL1,ADA,ADAM21,ADAM28,ADAMTS4,ADORA2A,ADORA2B,AIF1,ALOX5AP,ARNTL2,ATF3,AVPI1,BCL2A1,BCL2L1,BCL3,BDNF,BIRC2,BLVRA,BTNL9,BZW2,C3,CA2,CAPN2,CASP1,CASP6,CCDC186,CCL2,CCL20,CCL22,CCL25,CCL3,CCL3L3,CCL4,CCR5,CD163L1,CD1A,CD1C,CD247,CD36,CD4,CD40,CD44,CD72,CD80,CD86,CDH26,CEBPA,CEBPB,CHCHD7,CHI3L1,CHST2,CIDEB,CISH,CLEC4A,CLEC7A,COL18A1,COL1A1,COL6A2,CTNNAL1,CTSB,CTSS,CX3CL1,CXCL10,C…	1705 (13)
NCOA2	1.277	transcription regulator	Activated	2.965	5.70774	1.96e-06	ABCB11,ACOT1,AHR,ALDH1B1,APOC2,APOM,AR,BAZ2A,BCAS1,C1R,C3,CCL22,CCL3L3,CCL4,CCND1,CCR7,CDKN1A,CEBPA,CEBPB,CIITA,CXCL10,CYP17A1,CYP1A1,CYP51A1,EGR1,ELOVL6,GBE1,GBP5,GCK,GPD2,GPR34,GPX1,HCAR2,HLA-A,HSD11B1,IFIT2,IFNG,IL1A,IL1B,IL6,IRF1,IRF7,ISG15,KLF4,KLK3,LIPG,MYB,NFKBIA,NOS3,NQO1,OAS3,OASL,P2RY12,PGM3,PLTP,PPARG,PPP1R3B,PPP1R3C,PRDX1,RAI1,RARG,RET,RORA,SQSTM1,STAR,TCF3,THRA,TMEM100,TNF,TRIM5,TSC2…	2052 (19)
deferasirox		chemical drug	Activated	2.964	8.37469	4.22e-09	ADGRG1,AKT1,ANKRD22,ANXA2,F13A1,FOS,GAS7,ITGAM,JUN,LRRC25,LY75,MCEMP1,ME1,MS4A6A,PIP5K1B,PLCB1,PLD4,PPARG,PRKCA,RGS1,SERPINB8,SLC26A11,SLC2A14,SULF2,TNF,TNFSF10,TREML2	1165 (10)
TLR8	5.412	transmembrane receptor	Activated	2.96	1.60555	0.0248	CCL1,CCL2,CCL4,CCR7,CD40,CD83,CD86,CXCL10,CXCL2,CXCL8,CYP27B1,IFNA2,IL12A,IL12B,IL1B,IL27,IL6,TNF,VDR
HBEGF	-1.958	growth factor	Activated	2.956	2.61083	0.00245	ANGPTL4,AR,BCL2,BCL3,CCL20,CCND1,CCND2,CSF1R,CXCR4,DEFB4A/DEFB4B,EGFR,EGR1,EREG,FGF2,IL19,IL1B,IL23A,IL36G,IL6,ITGB1,LALBA,MUC1,NES,NFKBIZ,S100A14,VEGFA	2011 (17)
STAT5B	-1.021	transcription regulator	Activated	2.947	12.054	8.83e-13	A2M,ABCB1,ABCG2,ACOT1,ACOT4,ADGRG1,AGPAT2,AHNAK,AKR1C1/AKR1C2,ANKRD13B,APOE,AR,ARNT,ASAP1,BCL2,BCL2L1,BCL6,BIRC3,BMF,CA2,CASP4,CASP6,CBR1,CCDC141,CCL3L3,CCND1,CCND2,CCNE1,CD27,CD276,CD81,CD9,CDK6,CDKN1A,CHEK1,CISH,CITED2,CORIN,CRADD,CUX2,CYP17A1,DDIT3,DEF8,DKK4,DUSP1,EBF1,EGFR,ESAM,ESR2,FAM89A,FOS,FOSL2,FOXP3,G0S2,GAB3,GABARAPL1,GADD45A,GADD45B,GBP6,GCK,GIMAP1,GIMAP6,GLUL,GPD1,GPX7,HAMP,HLA-A,IFI…	2218 (18)
TLR1	-1.105	transmembrane receptor	Activated	2.939	4.25337	5.58e-05	CSF2,CXCL8,CYP27B1,DEFB4A/DEFB4B,HAMP,IFNG,IL12B,IL15,IL15RA,IL1B,IL6,TNF,TNFAIP3,VDR	1125 (14)
AKT1	-1.339	kinase	Activated	2.926	7.767	1.71e-08	ABCB1,ACTA2,AIP,AKR1C1/AKR1C2,AKT1,ANKH,AR,ASS1,AURKB,BCL2,BCL2A1,BCL2L1,BCL2L11,BIRC3,BIRC5,CCL2,CCL3L3,CCL4,CCND1,CCND2,CCNE1,CD4,CD40,CD44,CD69,CD86,CDKN1A,CEBPD,CISH,CKS2,CLU,CRYZ,CXCL10,CXCL2,CXCL8,CXCR4,DHCR7,DIAPH1,DLG4,E2F1,EGR1,EPO,EZR,FBXO32,FGF2,FN1,FOS,FOXO1,FOXP3,GCK,GCLC,GCLM,GDF15,HAVCR2,HMGB2,HNRNPM,IFNG,IGFBP5,IL10,IL12B,IL2RA,IL4,IL6,IRS1,ITGB1,LAMA1,LAMB1,LIPA,LSS,MCL1,MDM2,ME1…	2744 (20)
IRF5	-1.312	transcription regulator	Activated	2.926	5.74232	1.81e-06	AKT1,BCL2L1,CCL19,CCL3,CCL4,CDKN1A,COL1A1,CXCL10,CXCL2,CXCR4,DAPK2,FOXO1,IFI44,IFIH1,IFIT1,IFIT2,IFIT3,IFITM3,IL12A,IL12B,IL23A,IL4,IL6,IRF5,IRF7,ISG15,ISG20,NAMPT,NT5C3A,OAS1,OAS2,OASL,PLSCR1,PRDM1,RSAD2,SP110,STAT1,STAT2,TMPO,TNF,TNFSF10,UBE2L6,VEGFA,ZNF443	1103 (17)
NOTCH1	1.614	transcription regulator	Activated	2.922	13.8633	1.37e-14	ACTA2,ADAM19,AKR1C1/AKR1C2,AQP3,BCL2,BCL2L1,BCL6,BIRC2,BIRC3,CCND1,CCND2,CCNE1,CD44,CD68,CD82,CDCA7,CDH2,CDKN1A,CDKN1C,CEBPA,CEBPB,CEBPD,CHGA,CNN1,COL1A1,CSF1R,CSF2RB,CXCL8,CXCR4,DLL4,DTX1,E2F1,ECT2,EFNB2,EGFR,EPHA4,ERBB2,ERBB3,FCGR2A,FCGR2B,FGF2,FLT1,FOS,FOSL1,GAA,GATA3,GLI1,GLS,GRN,HES1,HES5,HES7,HEY1,HEYL,HSPA8,HSPE1,ICAM1,ID1,ID2,IFI16,IFNG,IGFBP2,IGFBP4,IL10,IL12A,IL12B,IL17A,IL18,IL1A,IL23A…	2196 (17)
MYOC	1.382	other	Activated	2.92	4.06198	8.67e-05	ANXA1,CA2,CD44,CNKSR2,DAG1,DDIT3,DPP7,EGR2,ENPEP,EPHA2,FBXO32,FN1,FSCN1,HOXA7,HSPA5,IGFBP5,INHBE,ITGB1,KCNJ2,KLHL41,LAMA2,LAMB1,LAMC1,LY6K,NOL3,PHLDA2,PLXNC1,PRKCB,PTGER4,PXDN,RHBDF1,RUNX2,SESN2,SFRP1,SLC2A3,SLC7A11,SP100,STC2,TCEAL7,UPP1	1811 (17)
G protein alpha		group	Activated	2.92	2.89279	0.00128	ARFIP2,CALR,CD200,CD274,CHPF,CHST12,CLPTM1L,COG6,COPB2,DDOST,EGFR,ELK3,FOS,GSTO2,IFT57,LDAF1,LGALS12,LYSMD4,MATN2,NAPB,NDN,NMNAT2,NUCB1,P3H1,PDIA4,PLS3,RP2,RPN1,SEC13,SLC41A2,SLC46A1,SPCS1,SRPRA,TCEAL8,TMEM263,TSPAN31,TUBB6,UBL4A,UQCC2
ALB	1.97	transporter	Activated	2.916	3.07935	0.000833	ACTA2,CASP12,CCL2,CDKN1A,CDKN1C,COL1A1,CX3CL1,CXCL8,DDIT3,EDN1,EDNRA,EDNRB,ERN1,FN1,HPSE,HSPA5,IL1B,IL6,SCD,SQSTM1,SYNPO,TNF,VEGFA,XBP1	2171 (24)
3M-011		chemical reagent	Activated	2.915	2.27819	0.00527	BCL2,BCL2L1,CCL3,CCL4,CD40,CD80,CD83,CD86,CXCL10,CXCL8,IFNA2,IL6,ISG15,MX1,STAT1,TNF	1436 (17)
N-formyl-Met-Leu-Phe		chemical reagent	Activated	2.912	5.17457	6.69e-06	ACTL6A,ACTN1,ANLN,CAPG,CCL2,CCL4,CCR5,CKAP2,CORO1C,CXCL8,DIAPH1,IFIT2,IL13,IL1B,IL4,IL6,ISG15,ITGAM,KIF11,KIF23,NFKBIA,OSM,SELL,SELPLG,SIRPA,SOCS1,TAGLN2,TNF,VEGFA	958 (17)
SMPD1	1.301	enzyme	Activated	2.908	3.87943	0.000132	ACKR1,ACTA2,CCL2,CCL20,CCL25,CCL3,CCL4,CCR3,CCRL2,CLCF1,CMTM1,COL1A1,CSF3,CTSB,CXCL2,CXCL8,CXCL9,CXCR4,CXCR5,IL12A,IL6,JAK2,SQSTM1,TLR2,TNF,TNFRSF1A,TNFSF10,TYMP	1254 (13)
calcitriol		chemical drug	Activated	2.905	26.7747	1.68e-27	ABCB1,ABCB10,ABCC3,ABLIM1,ACSL1,ADAM19,ADCY9,AHR,AKAP12,AKR1B1,AKT1,ALOX5,ANGPT2,ANLN,ANXA2,APOL6,APP,AR,ARHGEF28,ARHGEF3,ATP10D,ATP2B4,BCL2,BCL2L1,BCL3,BIRC2,BIRC5,BRCA1,BUB1B,C15orf48,C3,CA11,CA2,CACNA1D,CASR,CAVIN1,CCL20,CCNA2,CCNB1,CCND1,CCND2,CCNE1,CCR8,CD28,CD38,CD40,CD44,CD69,CDC20,CDCA5,CDCA8,CDK1,CDK5R1,CDKN1A,CDT1,CEBPA,CEBPB,CEBPD,CELSR3,CENPA,CENPM,CENPS/CENPS-CORT,CHAF1A,CHAF1B,CHGA,…	1566 (15)
C1q		complex	Activated	2.905	4.17328	6.71e-05	CCL2,CD80,CXCL8,GAS6,ICAM1,IFNG,IL10,IL6,IRF5,MERTK,PECAM1,VCAM1	1028 (14)
EP300	-1.119	transcription regulator	Activated	2.902	25.4271	3.74e-26	ACACB,ACHE,ACOXL,ACTA2,ADORA2A,AKAP12,AR,ARHGAP24,ARHGEF10L,ARHGEF3,ARID5A,ATF6,AXIN2,AXL,B2M,BANK1,BBC3,BCL2L1,BCL6,BIRC5,BMF,BRCA1,CA2,CAMK2D,CAPG,CCL2,CCL3,CCND1,CCNE1,CCNG2,CCR7,CD160,CD274,CD36,CD80,CDC42EP3,CDCP1,CDKN1A,CDKN2B,CEBPA,CHPT1,CKB,CLASP2,CNN3,COL2A1,CORO2B,CRIM1,CRYBB2,CSF3,CXCL3,CXCL8,CXCR4,CYP19A1,CYP1A1,DHFR,DHRS3,DNAJB4,DTX1,DUSP1,E2F1,EDARADD,EDN1,EGR1,EGR2,EPHB2,EPSTI1,ERB…	2129 (15)
tazemetostat		chemical drug	Activated	2.901	14.71	1.95e-15	ABCB10,ABCC4,AMOT,AR,ATP7A,BCL11A,BDNF,BIRC5,CAMSAP3,CBFA2T2,CCND1,CCND2,CD44,CD58,CDCA3,CDCA7,CDH2,CDK5R1,CDK6,CKS2,CREB1,CREBBP,CSE1L,CTBP2,DDR2,DHRS3,DLC1,DNM3,DNMT3A,DOK4,DPYSL4,DSG2,E2F3,E2F8,EFNA3,EFNB1,EFNB2,EFNB3,EGFR,EHD1,EHMT2,EIF2AK2,EIF4E,ELF4,ELOVL6,ERBB2,EZR,FES,FEZ1,FGF2,FGFR1,FLRT3,FN1,FOXC1,GAP43,GDI1,GDPD5,GLI3,HDGF,HDGFL3,HMGA2,HMGB1,HMGN5,HNRNPA2B1,HNRNPD,HOXA10,HOXB9,HSPA5,ID…	806 (7)
BNIP3L	1.921	other	Activated	2.898	7.38195	4.15e-08	ANK1,AURKA,BCL2L1,BLNK,CCNA2,CCNE2,CD22,CDKN3,CENPE,CENPF,CHEK1,CKAP2,E2F1,GADD45A,GAPDH,GPSM2,HASPIN,IL1B,IL2RB,KIF11,LTA,LTB,NFKB2,NFKBIA,NT5C3A,NUF2,PDGFRB,PRIM1,PTK2B,RBL1,RRM2,SFRP1,SGO1,STAT3,TFRC,TOP2A	1390 (11)
ABT-737		chemical drug	Activated	2.897	3.1891	0.000647	BCL2A1,BCL2L1,BCL2L10,BCL2L11,CDKN1A,CEBPB,CXCL3,CXCL8,GADD45A,IL6,IRF1,MCL1,TNFRSF10B	1687 (15)
erlotinib		chemical drug	Activated	2.887	5.27654	5.29e-06	ACHE,AICDA,AXL,BBC3,BCL2L1,BCL2L11,CCL2,CCL20,CD36,CD40,CERS4,CSF2,CSF3,CXCL3,CXCL8,EGR1,FCER2,FGF2,FN1,ICAM1,IGFBP4,IGFBP7,IL12B,IL13,IL15,IL1A,IL1B,IL6,LIF,NFATC1,NFKB2,NFKBIA,NOX5,PDGFB,PLAU,PLAUR,SERPINB2,SERPINE1,SLC2A3,SNAI1,SOS1,SOX9,TLR2,TLR4,TLR5,TNF,TNFRSF10B,TNFRSF11B,TNFRSF13C,TNFRSF1A,TNFRSF1B,TRADD	1697 (13)
dithiothreitol		chemical reagent	Activated	2.884	2.62709	0.00236	ATF3,CCND1,CCNG2,DDIT3,ERBB2,ERO1B,GADD45A,HSP90B1,HSPA5,LMAN1,PTGES2,SEL1L,SYVN1,TLR2,UBXN4,VEGFA	1934 (22)
idarubicin		chemical drug	Activated	2.883	4.69037	2.04e-05	BBC3,BCL2,CD40,CDKN1A,FDXR,GADD45A,GBP1,IL1B,MCL1,MDM2,OAS1,SESN1,SESN2,TP53BP2,TRIAP1	1448 (7)
MST1R	-1.587	kinase	Activated	2.882	4.63827	2.3e-05	ACTA2,CCL3L3,CCL4,CCND1,CSF2,CXCL13,CXCL3,DVL1,FOS,ICAM1,IFNG,IL13,IL17A,IL27,JUN,MST1R,POU5F1,TNF,VIM	1415 (14)
tosedostat		chemical drug	Activated	2.878	6.13966	7.25e-07	ASS1,ATF3,ATF5,CBS/LOC102724560,CCNG2,CDKN1A,CEBPB,CHAC1,CLEC7A,CTH,CXCL8,DDIT3,FYN,GADD45A,PSAT1,SDC1,SESN2,SLC7A11,STC2,VEGFA,WARS1
nilotinib		chemical drug	Activated	2.875	2.80967	0.00155	ABCC4,ABCC5,BCL2L1,BCL2L11,BUB3,CCNA2,CCNB1,COL1A1,FN1,H2AX,IL7,JAK2,MAD2L1,MCM3,MCM6,MDM2,PRKDC,SMC3,SOS1,TTK,WEE1,YWHAZ,ZEB2	2018 (19)
PTPN3	-9.554	phosphatase	Activated	2.867	2.3363	0.00461	ANGPTL4,CDKN1A,CDKN2B,COL1A1,E2F2,FN1,JAG1,PDGFB,SERPINE1,SMAD7,TGM2,VDR	2407 (20)
TEAD4	-3.968	transcription regulator	Activated	2.865	8.84466	1.43e-09	ACTA2,ADM,ARID5B,BMP4,CBFA2T3,CCND1,CCNE2,CD34,CDK6,CDKN1A,CEBPA,CIDEC,EDN1,EDNRA,EGFR,EOMES,FGFR1,FILIP1L,FJX1,FLT1,GATA3,IGFBP5,IRF6,JUN,JUNB,KAZN,KLF8,LIMCH1,MB,MTMR10,MYH7,NFKBIA,NFKBIZ,NOTCH2,NOTCH3,NRXN2,NUAK1,PCDH18,PDGFRL,PLK2,PPARG,PTPRO,RANBP1,RB1,RCAN1,SAMD5,SLC2A3,SLFN5,SMAD1,SNAI1,SULF1,TEAD4,TFAP4,THBS1,TLE1,TNNC1,TP63,VEGFA	968 (9)
Ap1		complex	Activated	2.864	4.5544	2.79e-05	ACE,ATF3,ATP6AP2,BCL2A1,BCL2L11,BDNF,CALM1 (includes others),CCL2,CCL3,CCL3L3,CCL4,CCNA2,CCND1,CD40,CD44,CLU,CSF2,CXCL12,CXCL8,DDIT3,DNMT1,EDN1,ETS1,EZR,FN1,FOS,FOSL1,GZMB,HSP90B1,ICAM1,IFNG,IGF1,IL10,IL12B,IL13,IL1A,IL1B,IL23A,IL2RA,IL4,IL6,ITGA2,JUN,KLF9,KLK3,KRT18,MMP7,MT2A,NOS3,NOTCH4,NQO1,NR3C1,PADI4,PLAU,PLAUR,PRDM1,PRL,RRM2,S100A4,SERPINE1,SLC8A1,SNCG,SOCS1,SOCS3,TIMP1,TLR4,TNF,TNFRSF8,TSL…	1981 (17)
MDL 73811		chemical reagent	Activated	2.853	4.69037	2.04e-05	APP,C3,CDK1,CDKN1A,DHFR,FN1,IL32,ITGB3,LGALS3,LGALS3BP,MAD2L1,ORC1,PLK1,SERPINE1,TGM2	1140 (7)
beta-estradiol		chemical - endogenous mammalian	Activated	2.852	67.6757	2.11e-68	A2M,A4GALT,ABAT,ABCA1,ABCA3,ABCA8,ABCB1,ABCB10,ABCB11,ABCB6,ABCC5,ABCG2,ABLIM1,ACADVL,ACE,ACER2,ACKR2,ACKR3,ACOT9,ACP3,ACP5,ACSL1,ACSM3,ACSS1,ACTA2,ACTG1,ACTL6A,ACVR2B,ADA,ADAMTS4,ADCY1,ADCY4,ADCY9,ADGRB2,ADGRG2,ADIRF,ADM,ADM2,ADORA2A,ADRA1B,ADRB1,ADRB2,AEBP1,AGO2,AGRN,AHR,AIF1,AKAP1,AKAP12,AKT1S1,AKT3,ALCAM,ALDH7A1,ALG2,ALPP,AMOTL1,AMOTL2,AMZ1,ANK1,ANK3,ANKH,ANXA1,ANXA2,ANXA4,AP3B2,AP3D1,APBB1,A…	2899 (23)
JUNB	1.373	transcription regulator	Activated	2.852	6.10791	7.8e-07	APOM,ARNTL2,ATF3,BCL3,BDNF,C3,C5AR1,CASP4,CAV1,CCL20,CCL3L3,CCND1,CD274,CD44,CD68,CD82,CDC20,CLU,COL1A1,COL7A1,CSF2,CSF3,CXCL2,CXCL3,CYP19A1,CYP1B1,DUSP1,FBLN5,FN1,FOSL1,FOXP3,HES1,ID2,IFI16,IKZF2,IL10,IL12B,IL1B,IL4,IL6,ITGB3,JUNB,LAMB3,LIPE,LPAR1,MIXL1,MVD,NAMPT,NFKB2,PLAU,PLAUR,PNPLA2,POMC,PTBP2,RUNX2,SCD,SERP1,SERPINB2,SERPINE1,SGK1,SLC8A1,SNAI1,STAR,SYT1,TBX3,TIMP1,TNF,TNFRSF8,XBP1	2233 (20)
25-hydroxycholesterol		chemical reagent	Activated	2.85	1.87943	0.0132	ABCA1,ABCG1,ACSL1,APOD,ATF3,CCND1,CETP,CH25H,CHAC1,CXCL8,DDIT3,FAM189B,FOS,FOSL1,FOSL2,HSPA5,IFNG,IL13,IL1B,IL6,INSIG1,JUN,JUNB,NFKBIA,SCD,STARD4,SV2A,TNF,VLDLR
CD38	5.979	enzyme	Activated	2.84	16.5214	3.01e-17	ACTA2,AICDA,ALDOC,ANXA2,ASS1,ATP1B1,BCL6,BNIP3,BNIP3L,CCL22,CCND2,CCNE1,CD44,CD86,CHST12,CISH,CITED2,CKAP4,COL1A1,CPEB3,CRELD2,CRIP1,CSF2RB,EAF2,EGLN3,EIF4EBP1,ELL2,ENDOG,EPS8,EVI5,FAM162A,FGL2,FN1,GALK1,GBE1,GBP2,GBP4,GCAT,GLIPR2,GSTT2/GSTT2B,HMMR,ICAM1,IL1R2,IL2RA,IL6,IL6R,ITGB7,JCHAIN,LFNG,LGALS3,LGALSL,LRRC8C,LTA,MANF,MYADM,NABP1,NEK2,NT5E,P4HA1,PDK1,PDLIM1,PGM1,PKIB,PPARA,PPP3CA,PRDM1,PSAT1,…	2083 (18)
EPAS1	-1.081	transcription regulator	Activated	2.837	12.3188	4.8e-13	ABCG2,ACP5,ADM,AKAP12,ALDOC,ANGPT2,ANGPTL4,APLN,AXL,BBC3,BCL2,BIRC3,BNIP3,CACNA1A,CAV1,CCND1,CCR2,CCR5,CD274,CDC42EP5,CDCP1,CDKN1A,CEBPA,CEBPB,CITED2,CKB,CKMT1A/CKMT1B,CNKSR2,CORO1A,CXCL12,CXCL2,CXCR4,CYBRD1,CYP51A1,DDIT3,DECR2,DMXL1,DTX1,EDN1,EGFR,EGLN3,EOLA1/EOLA2,EPO,FAM13A,FGF2,FLT1,FMO5,FN1,FOS,GADD45B,GALR2,GBE1,GCHFR,GLS,GPX1,HAMP,HILPDA,HOXA5,HSPA5,ICAM1,ICOS,IFNG,IFNGR1,IGFBP5,IL2RA,IL2R…	1760 (19)
TAS4464		chemical drug	Activated	2.837	5.11862	7.61e-06	BBC3,BCL2A1,BCL6,CDKN1A,E2F1,E2F2,EGR1,FOS,GADD45A,ITGAX,KLF6,LAMB3,MCL1,PLK1,SLC25A5,SLC3A2,SUMO3,TIMP1,TNF,VEGFA,VIM	1829 (15)
palmitic acid		chemical - endogenous mammalian	Activated	2.823	5.51286	3.07e-06	ACSL1,AHR,AKT1,APOM,ATF3,ATF6,BBC3,BCL2,BCL2L1,BCL2L11,BIRC3,C1QTNF12,CCL19,CCL2,CCL3L3,CCL4,CD28,CD36,CD68,CD86,CDKN1A,CERS6,CGAS,CNR1,CPE,CPT1B,CTCF,CTSB,CXCL10,CXCL2,CXCL3,CXCL8,DDIT3,DEFB4A/DEFB4B,DEGS1,EGLN3,ELOVL6,ERN1,ETV5,FBXO32,FN1,FOS,FOXO1,GAPDH,GCK,GCLC,GDF15,GPAT3,HLA-A,HSP90B1,HSPA5,HTR2B,ICAM1,IDO1,IGF1,IL10,IL12B,IL1B,IL1RN,IL6,IL6R,IRAK2,IRS1,JUN,KDM6B,KDSR,KLF4,MCL1,MGAT4A,MIOX,…	2226 (20)
PPARGC1B	1.114	transcription regulator	Activated	2.822	0.764472	0.172	ABCA1,ACACB,ACADVL,C3,CCND1,CKB,CPT1B,EGLN3,ERBB2,ESRRA,FBXO32,GCK,GRB7,LSS,MITF,MTTP,MVD,MYH6,PGAP3,RUNX2,SCD,SQLE,VEGFA
VIPR1	7.511	G-protein coupled receptor	Activated	2.815	3.3279	0.00047	CCL3L3,CCL4,CD40,CD80,CD86,CXCL10,CXCL2,CXCL3,IL10,IRF1,TNF	990 (18)
ACTN4	1.036	transcription regulator	Activated	2.813	1.6968	0.0201	ANGPTL4,CCL2,CCND1,CXCL8,FOS,IL1B,PDLIM1,SERPINE1,SNAI1,WNT5A
methylnitronitrosoguanidine		chemical toxicant	Activated	2.81	8.40782	3.91e-09	BBC3,BTG1,BTG2,CASP10,CCND1,CDKN1A,CEACAM1,CEBPA,EGR1,GADD45A,GDF15,IRF1,KLF10,MDM2,MSH2,PLAT,PLAU,POLB,POLH,SERPINE1,TNFSF10,TP53I3,TRAIP	1781 (16)
farnesol		chemical reagent	Activated	2.807	4.31515	4.84e-05	ATF3,CCNB1,CD1D,CDKN1A,DDIT3,HERPUD1,HSP90B1,HSPA5,IVL,LORICRIN,PDIA4,PHLDA2,PPARA,TNF,XBP1	1816 (20)
GABARAPL1	1.754	other	Activated	2.806	3.37161	0.000425	ABCA2,ARSG,BLVRB,CSPG4,CSTB,CTSB,CXCR4,IDS,INSIG1,LAMB3,LGMN,NCSTN,NPC2,OPRK1,PDGFB,TPP1,UPP1
IFNA17	-1.023	cytokine	Activated	2.804	3.2644	0.000544	CD86,CXCL10,CXCL9,EIF2AK2,IFIH1,IFNG,MX1,PLAAT4,STAT4,ZBP1	859 (11)
ADAM17	1.104	peptidase	Activated	2.799	3.51713	0.000304	AXIN2,CCND1,CSF3,CXCL2,CXCL8,EFNB2,EGFR,FGF18,FN1,HES1,ICOSLG/LOC102723996,IL36A,IL6,IL6R,IL6ST,ITGB1,LORICRIN,LRG1,MMP7,MYH7,NCALD,NOTCH1,PLAT,PRNP,SELL,SOCS3,SOX2,SOX9,TBX4,TNF,TNFRSF11B,TNFSF11,TSLP,WNT5A	1533 (14)
TGIF1	1.693	transcription regulator	Activated	2.798	3.14448	0.000717	ACAT1,ACSS1,ACSS2,CCL3,CXCL2,CXCL3,CXCL8,IL1B,IL6,IL7,MLYCD,PC,STRA6,TNFSF4,XCL1	1748 (23)
lysophosphatidylcholine		chemical - other	Activated	2.797	4.67162	2.13e-05	ABCA1,BDNF,CCL2,CCL3L3,CD274,CD36,CSF2,CXCL8,CYP51A1,DHCR7,EGR1,HBEGF,HLA-DRB1,ICAM1,IL1B,IL2RA,IL6,INSIG1,IRF5,JUN,LRP1,LSS,MSMO1,MVD,NAIP,NOS3,OLR1,PLAU,PLAUR,PPARG,RDH11,RGS2,SCD,SERPINE1,SQLE,TM7SF2,TNF,TNFRSF9,TNFSF15	1978 (25)
TLR6	1.034	transmembrane receptor	Activated	2.789	4.31515	4.84e-05	ATF3,CSF2,CXCL8,DEFB4A/DEFB4B,HAMP,IFNG,IL12B,IL13,IL15,IL17A,IL1B,IL23A,IL4,IL6,TNF	1079 (16)
5-fluorouracil		chemical drug	Activated	2.786	5.58336	2.61e-06	ABAT,ABHD4,ACVR1B,AEN,AHSA1,ANKRA2,ANXA2,ANXA4,ATF3,BBC3,BCL2,BCL2L1,BCL2L11,BIK,BIRC2,BIRC5,BNIP3,BNIP3L,BTG2,CALU,CCND1,CCND2,CCNG1,CCT4,CCT6A,CD40,CD80,CD81,CD82,CD86,CDHR5,CDK1,CDKN1A,CES2,CLU,CSF1R,CSTB,CTSD,DCXR,DDB2,DLL4,DRAM1,E2F1,EGR1,EIF1,EIF4A1,EPHA2,ERN1,FBXW7,FDXR,FKBP1A,FOXO1,GADD45A,GAP43,GAPDH,GDF15,GTF2H2,HBEGF,HNRNPA2B1,HSPA8,HSPE1,IER5,IFNG,IL1A,IL1B,JAG2,JUN,LIF,LOC102724788/P…	2306 (19)
lysophosphatidylinositol		chemical - endogenous mammalian	Activated	2.785	6.15614	6.98e-07	ANGPT2,C3,CASP1,CCL2,CD274,CD36,CNR1,CSF3,CX3CL1,CXCL3,CXCL8,ESR2,GLS,GLUL,HLA-DRB1,ICAM1,IL15,IL1A,IL1B,INSIG1,ITGA1,LTB,OLR1,SGPP2,STAB2,TG,TLR3,TNFRSF4,TNFSF15	1429 (13)
STAT5a/b		group	Activated	2.785	6.03668	9.19e-07	AHR,AKT1,BCL2,BCL2A1,BCL2L1,BCL2L11,BCL6,BMP6,CCND1,CCND2,CD36,CD69,CDC42EP5,CDKN1A,CDKN2C,CISH,CLU,CSF2,DUSP1,DUSP2,EBF1,EPHA4,F2R,FCMR,FOS,FOXP3,GATA3,GZMB,ID2,IFNG,IGF1,IGFALS,IL13,IL17A,IL1A,IL2RA,IL4,IL4R,IRF1,LCP2,MCL1,MEF2C,MMD,NOX5,OSM,PARVB,PDE4B,PDGFB,PIM2,PRDM1,RBP1,SLC2A3,SLC35D3,SOCS1,SOCS3,STIP1,TLR2,TNNI1,TSLP,VWF	1863 (15)
ITGAV	1.062	transmembrane receptor	Activated	2.78	4.35655	4.4e-05	BCL2,BCL2L1,BIRC2,CCL3L3,CCL4,CD36,CDK1,CDKN1A,COL1A1,CXCL10,FN1,FOS,GBP2,HLA-A,HLA-E,ICAM1,IL1B,IL6,ITGA1,ITGA5,ITGAM,ITGB3,OSM,PLAU,PTHLH,RUNX2,SERPINE1,TIMP1,TNF	1557 (17)
IFIH1	1.677	enzyme	Activated	2.779	4.63264	2.33e-05	CCL2,CCL3,CCL4,CD4,CISH,CXCL10,CXCL2,CXCL3,CXCL8,EGR1,IFI27,IFI44L,IFIT1,IFNG,IL12B,IL1B,IL6,IRF7,ISG15,LCK,NFKBIA,OAS1,OAS2,PTPRJ,RND3,RSAD2,TNF,USP18	1049 (17)
IFNA14	5.428	cytokine	Activated	2.778	4.65561	2.21e-05	CXCL10,CXCL9,IFIH1,IFIT1,IFNG,IRF7,ISG15,ISG20,MEST,MX1,PLAAT4,RSAD2,STAT4,ZBP1	860 (11)
SP3	1.055	transcription regulator	Activated	2.777	16.0448	9.02e-17	ABCA1,ABCB1,ACSL1,ACTA2,ADCY4,AEBP1,AKAP12,ALOX15B,ANGPT2,ATF3,BIRC5,BMF,CBS/LOC102724560,CCL20,CCND1,CD2AP,CD40,CDC25B,CDH2,CDK5R1,CDKN1A,CDKN2C,CEACAM1,CEBPA,CETP,CHI3L1,CITED2,COL1A1,COL2A1,COL7A1,CYP17A1,CYP51A1,CYP7B1,DHFR,DMD,DNM1,DNMT3A,DUSP1,E2F1,EGFR,EGR1,EIF2AK2,EREG,F2R,FLT1,FOS,FOSL1,FOXP3,GABRA4,GDF15,GHR,GRIN1,HGF,HPSE,HSD11B2,HSD17B1,HSPA5,IGF1,IL10,IL12RB2,IL1A,IL2RB,ITGA2,ITGAD,I…	2333 (23)
1-palmitoyl-2-oleoylphosphatidylserine		chemical - endogenous mammalian	Activated	2.777	6.5376	2.9e-07	ACVR1,BMPR2,CCL1,CCL3L3,CCL4,CSF2,CSF3,CXCL10,CXCL2,CXCL3,IL10,IL13,IL23A,IL4,IL6,LIF,OSM,TNF,TNFRSF12A,TNFRSF1B,VEGFA	453 (7)
cobalt chloride		chemical reagent	Activated	2.771	4.87943	1.32e-05	ABCB10,ACTA2,ADM,ADORA2B,ATP7A,BBC3,BCL2,BDNF,BHLHE41,BNIP3,CCR7,CD274,CDKN1A,CLU,COL18A1,CXCL8,CXCR4,CYBRD1,CYP1A1,CYP1B1,DEPP1,DUSP1,E2F1,EPO,FLT1,HES1,HSD11B2,MCL1,MDM2,MIAT,MITF,NCOA2,PLAUR,RGS1,RGS5,SERPINF1,SLC1A1,SLC1A3,SMAD1,SMAD7,SPHK1,TFRC,TJP1,VEGFA,WT1,ZNF667	2245 (19)
Srgn		other	Activated	2.77	4.19997	6.31e-05	CD300LF,CD68,CD83,CMA1,CXCL13,EGR3,FCMR,GPR65,HLA-DRB5,IFNG,IL12B,IL1B,ITGAM,ITGAX,JCHAIN,LCK,MZB1,NEURL3,RINL,S100A9,SERPINB8,SERPINB9,STAC3,TBC1D10C,THBS1,TREM1	1227 (9)
ATF2	1.347	transcription regulator	Activated	2.769	3.32057	0.000478	ARNT,ATF3,BCL2,BCL2A1,BCL2L1,CCNA2,CCND1,COL24A1,CXCL8,DDIT3,DUSP1,DUSP10,DUSP5,DUSP8,EGR1,FN1,FOS,GADD45A,IFNG,IL10,IL13,IL23A,IL6,ITGB8,JUN,MCL1,MEIS2,MT2A,MYH7,MYLK,NOTCH1,NUPR1,PDGFRA,PLAU,PPARG,RHOB,SULT4A1,TNF,VCAM1,ZNF268	1943 (15)
SP4	-1.072	transcription regulator	Activated	2.766	4.19997	6.31e-05	BIRC5,CCL2,CCND1,CDKN1A,CXCL3,EGFR,FLT1,GABRA4,GRIN1,HSPA5,IL12A,IL15,IL18,IL1RN,IL23A,IL2RB,IL32,IL7,mir-27,MYH7,OSM,PDE6B,STAT3,TNFSF10,TNFSF15,VEGFA	826 (7)
ERVW-1	-4.017	other	Activated	2.764	2.21396	0.00611	CCNA2,CDCA8,CDKN1A,CREB3L1,CXCL8,HSPA5,IL6,LATS2,MCM2,SLC1A4,XBP1	1959 (16)
CD44	1.821	other	Activated	2.757	10.1337	7.35e-11	ABCA2,ABCB1,ABCG2,ACKR3,ACTA2,ADRB2,BCL2,BCL2L1,BIRC2,BIRC3,BIRC5,CALR,CCL19,CCL4,CCND1,CCND2,CCNG1,CCR2,CCR5,CCR7,CD274,CD36,CD44,CD69,CDKN1A,CIDEC,CLEC7A,CLU,COL18A1,COL1A1,CSF2,CTTN,CX3CL1,CX3CR1,CXADR,CXCR3,DDIT3,DNMT1,ERBB2,FN1,GADD45A,HDGF,HMMR,IFITM2,IFNG,IL10,IL1A,IL1B,IL1R2,IL1RN,IL2RA,IL6,IRAK3,ITGA3,ITGA4,ITGA5,ITGAX,JUN,KDM1A,KDM1B,KREMEN1,LAMB1,LAMC1,LGALS3,LIMS2,LTBP2,MBNL3,MCL1,MMP…	2203 (16)
isotretinoin		biologic drug	Activated	2.754	4.28819	5.15e-05	ABCA1,ABCG1,BCL2,BCL2L1,CCL2,CD38,CDKN1A,CKS1B,CXCL8,CYP1B1,ELF3,GAP43,GATA3,HOXA5,IFIT3,IFNG,IL12B,IL6,IRF1,IVL,NFKB2,OAS1,OLR1,PLA2G15,PLAAT4,PRKCA,RARG,RBP1,S100A2,S100A9,SPN,STAT2,TFRC,TLR2,TNFAIP2,TNFSF10,VCAM1	2243 (24)
RNASE2	-1.023	enzyme	Activated	2.752	2.98716	0.00103	CCL1,CCL2,CCL22,CCL3,CCL4,CD83,CD86,CSF1,CXCL10,CXCL9,IL10,IL12B,IL13,IL2RA,IL6,IL7,OSM,TNF,TNFRSF1A	1287 (18)
IL9	-1.023	cytokine	Activated	2.752	1.29073	0.0512	ACTN1,BCL3,CAPN2,CCL2,CCL20,CCL3L3,CFL1,CMA1,CTTN,GZMB,IFNG,IL13,IL4,JUNB,MARCKS,PECAM1,PIM2,PLS3,S100A10,SCIN,TNF,VEGFA
PALMD	2.143	other	Activated	2.751	1.24489	0.0569	ALDOC,CCL2,CCL20,CXCL2,ICAM1,IL1B,IL6,PGM2,PIK3R1,RUNX2,TNFAIP3
CFI-402257		chemical drug	Activated	2.747	4.29499	5.07e-05	CCL2,CCL20,CD55,CXCL2,CXCL3,CXCL8,EREG,GEM,GMFG,ICAM1,IGF1,IL1A,IL1B,IL6ST,IL7,ITGA2,PLAT,PLAU,PLAUR,PTGES,S100A9	1162 (16)
SPARC	-1.211	other	Activated	2.735	7.92445	1.19e-08	ABCC4,ACOT2,APH1B,BARD1,BLM,BRCA1,BRIP1,CABYR,CASP1,CCL19,CDYL,CEBPD,CHAF1A,CHAF1B,CIART,CIDEC,COL1A1,CPT1B,CYP1A1,DVL1,FANCB,FN1,GPD1,HAT1,HES1,HSF4,IFIT2,IFIT3,IL1B,IL6,IRF7,ISG15,JAK2,LEF1,MAP2,MCM6,MSH2,NES,NIPAL1,NOTCH1,NOTCH2,PCGF2,POLE,POLE2,PPIH,RABL6,SERPINE1,SLC7A11,SNAI1,SOX9,STAT1,STAT3,SYDE2,TBX3,TMEM45A,TNF,TOPBP1,TRIM2,TRIM5,TSKU,VIM,XAF1,ZHX2	2369 (24)
LHX1	-1.308	transcription regulator	Activated	2.734	0.420216	0.38	ASS1,ATP1B1,CADPS2,CLTRN,CXCL12,CXCR4,CYB561,CYP27B1,DPP4,EMB,FBP1,FGF5,FN1,FZD5,GAD1,GCNT1,HES5,HESX1,HHEX,JAG1,KCNJ15,PKDCC,PRXL2A,PTK2,PXN,SAMD3,SEMA6D,SFRP1,SLC32A1,SLC34A1,SLC47A1,SNAI1,TMEM52B
POU2F2	2.08	transcription regulator	Activated	2.732	6.96658	1.08e-07	ADA,ALDOC,ALOX5,BANK1,BBC3,BCL6,BTLA,CCR5,CD22,CD69,COCH,CXCR5,DACT3,DEPP1,DHRS9,DIXDC1,EBF1,ELL2,FCRL1,FCRL2,FCRL4,FJX1,FRMD4A,GPR183,HNF1B,IL10,IL12A,IL6,JUN,LCK,LRRC32,MCM7,mir-210,MOCOS,PFKFB4,PLEKHG1,POU2F2,RYR1,SCD,SNRPB,SPI1,SSTR2,STAT3,SYDE2,TERT,TNFAIP2,TNFRSF12A,TNFRSF21,XBP1,ZDHHC23	837 (9)
ibrutinib		chemical drug	Activated	2.73	8.83863	1.45e-09	AIMP2,ATP6V0A1,ATP6V0E1,BCL2,BCL2L1,BYSL,CBX3,CCDC71L,CCNJL,CD44,CD69,CD86,CDK6,CDKN2B,CKAP4,CLDN11,DCTPP1,DHRS3,DOCK5,DUSP2,EIF4E,EXOSC5,GAPDH,GLS,HES1,HES6,HSPD1,HSPE1,IDO1,IFITM3,IFNG,IL6,IMP4,ITGA4,ITGB1,JCHAIN,LPAR6,MAP3K6,MCL1,MCM5,MRTO4,MSC,MYBBP1A,NDUFAF4,NDUFS6,NECTIN1,NMUR1,NPM1,NR2F6,NRIP1,OSM,PA2G4,PIK3R6,PLAAT4,PLK1,PLK4,POU2F2,RCBTB2,RILP,RRP9,SELL,SLC19A1,SLC2A5,SORD,TFB2M,TGFBR3,T…	1435 (21)
cocaine		chemical drug	Activated	2.729	3.60555	0.000248	ADCY1,ADORA2A,ASMT,BCL2,BDNF,BTAF1,CASR,CCL2,CCR5,CNR1,CREB1,CXCL2,CXCL8,DLG4,DNMT3A,DUSP1,DUSP5,EFNB2,EGR1,EGR2,FGF2,FHL2,FOS,FOSL1,FOXO1,FRMD6,GABRA4,GABRB2,GADD45A,GADD45B,GPR19,GPSM1,GRIN1,HOMER1,ICAM1,IFIT1,IL6,INA,JUN,JUNB,LAMC2,MAP2K6,MCL1,MEST,mir-130,mir-132,MKNK2,MNS1,MX1,NFKB2,NOS1,OAS1,PDE6B,PDGFB,PDXK,PITPNA,PLCXD1,POMC,PRDX2,PRL,SDK1,SEC24A,SHF,SIAH2,SIGMAR1,SLC16A10,SPAG4,STAT1,STA…	1736 (20)
Fibrinogen		complex	Activated	2.728	3.1891	0.000647	BCL3,CCL2,CCL3L3,CCL4,CD40,CXCL3,CXCL8,ICAM1,IL1B,IL6,ITGAM,TLR2,TNF	1817 (14)
IL-17f dimer		complex	Activated	2.728	2.99568	0.00101	CCL2,CCL3,CCL4,CSF2,CSF3,DEFB4A/DEFB4B,IL10,IL13,IL1A,IL1B,IL6
IL17a dimer		complex	Activated	2.724	3.29158	0.000511	CCL2,CCL20,CCL3,CCL4,CSF2,CSF3,DEFB4A/DEFB4B,IFNG,IL10,IL13,IL1A,IL1B,IL6,TNF	1031 (7)
ESRRG	-3.881	ligand-dependent nuclear receptor	Activated	2.723	0.412289	0.387	ACO1,ALDOC,ATP4B,CCL20,CDKN1A,CYP19A1,DLST,FBXO32,GAPDH,HADH,HGF,IL12B,IL17A,IL32,IL36G,IL7,KCNE3,KCNQ1,KLK3,MB,NR3C1,OGDHL,PPARA,VEGFA
NfkB1-RelA		complex	Activated	2.722	2.48413	0.00328	ADAMTS4,CCL2,CCL20,CCND1,CSF2,CSF3,CXCL3,CXCL8,ICAM1,IL12B,IL15,IL1B,IL6,RGS13,RGS16,TNF,TNFRSF11B,TNFSF11,VCAM1	1229 (9)
RUNX2	6.392	transcription regulator	Activated	2.715	4.25104	5.61e-05	ABCB1,ACTA2,AKT1,ALPP,AXIN2,BCL2,BIRC5,C4A/C4B,CCND1,CCNE1,CCR2,CCR5,CDH2,CDHR5,CDKN1A,CEBPA,CEBPD,CIITA,COL1A1,COL24A1,CREB3,CXCL8,CYP19A1,EDN1,FABP6,FGF18,FN1,GADD45B,GALNT3,GFI1,JAG1,LEF1,LGALS3,MKI67,MYH11,NUDT12,PCDH18,PLAU,PTK2,RGCC,RUNX1,RUNX2,SCT,SELPLG,SERPINE1,SNAI1,SOX5,SOX9,ST3GAL5,TG,TIMP1,TNFRSF11B,TNFSF11,VEGFA	2006 (20)
DSCAML1	1.407	other	Activated	2.714	7.83565	1.46e-08	ANK3,ARHGAP33,BDNF-AS,BMP6,CNTNAP1,EGFR,EMX1,ETV5,FRK,GPR3,GRIN3B,ID3,JAK3,KCNA2,KCNJ2,KLF4,KLF9,LGI1,MAP2,MICALL2,MYT1,NEFH,NLGN2,NOS1,NOTCH3,NPAS3,NRCAM,NRN1,NTNG2,NTRK2,PDGFA,PDGFB,PLCB1,PLD1,PLXNC1,PRKCB,PRKCH,RIMS1,RIMS3,SEMA4G,SEMA7A,SFRP1,SNCAIP,SRGAP3,TUBB2A,TUBB3,TUBB4A,VGF,VLDLR
ALOX5	1.439	enzyme	Activated	2.705	0	1	ALOX5,APP,CCL3L3,CCND1,CD36,CDKN1A,DCSTAMP,HSP90AA1,IFNG,IL12A,IL12B,IL17A,IL1B,ITGB3,let-7,mir-130,mir-1304,mir-132,mir-221,mir-25,mir-26,mir-29,mir-4449,mir-548,MIR378I,NFATC1,PPARA,SOCS1,TNF
CD14	-1.369	transmembrane receptor	Activated	2.703	6.07212	8.47e-07	BCL2A1,CCL1,CCL2,CCL3,CCL3L3,CCL4,CISH,CXCL10,CXCL12,CXCL2,CXCL8,CXCR2,CYP27B1,DEFB4A/DEFB4B,GPT,ICAM1,IFIT1,IFNG,IL10,IL10RA,IL12B,IL1B,IL1R1,IL2RA,IL4,IL6,ITGB1,SOCS1,SOCS3,TLR2,TNF,TNFAIP3,VCAM1	1105 (14)
NFKBIA	1.3	transcription regulator	Activated	2.7	18.5157	3.05e-19	A2M,ACKR3,ADGRE5,AEBP1,ALOX15B,ATF2,ATP11A,AURKB,AXL,BCL11A,BCL2,BCL2A1,BCL2L1,BCL3,BIRC2,BIRC3,BMPR2,BNIP3,BRF2,BTG2,BUB1B,C3,CASP4,CCL2,CCL20,CCL3L3,CCNA2,CCNB1,CCND1,CCND2,CCNE2,CCR1,CCR3,CD40,CD44,CD69,CD80,CD82,CD86,CDC25B,CDKN1A,CDKN2D,CEBPB,CEBPD,CH25H,CHI3L1,CHI3L2,CITED4,CKS1B,CLU,COL2A1,CSF1,CSF2,CSF3,CSK,CTSB,CX3CL1,CXCL10,CXCL12,CXCL2,CXCL3,CXCL8,CXCR4,CYP1B1,CYP7B1,DAG1,DDIT3,ENPP2,E…	1951 (14)
TGFB3	-1.294	growth factor	Activated	2.698	3.51428	0.000306	ACTA2,ACTG2,ADAM19,BCL2,CCNE1,CDH2,CDKN1A,CDKN2B,CLDN11,COL1A1,COL2A1,CYP19A1,ENG,ETS1,FGF2,FN1,FOS,FOSL2,GATA3,ITGB3,JUN,LEF1,LTBP2,LTC4S,MAPK11,MICAL2,MIXL1,MYO10,PLAUR,PLK1,PLOD2,PTAFR,PTHLH,SCD,SERPINE1,SERPINE2,SH3PXD2A,SMAD7,SNAI1,SOX9,TGFB3,TGFBR3,THBS1,TJP1,TNFRSF11B,TNS1,TSPAN2,VEGFA,ZEB2	1982 (17)
IFNW1	-1.992	cytokine	Activated	2.698	3.48812	0.000325	CD40,CD80,CD83,CD86,CXCL10,CXCL9,IFIH1,IFNG,MARCHF1,PLAAT4,STAT4,TLR3,ZBP1	860 (11)
ribavirin		chemical drug	Activated	2.695	8.05355	8.84e-09	CCL22,CCL3L3,CD38,CD80,CD86,CXCL8,EIF2AK2,HERC5,IFI27,IFI44L,IFI6,IFIT2,IFIT3,IFITM1,IFNG,IL10,IL4,IL6,IRF1,IRF7,ISG15,ITGAM,MX1,OASL,RNF125,RSAD2,STAT1,TNF,USP18	1636 (14)
GDF2	-1.655	growth factor	Activated	2.694	5.28567	5.18e-06	ABCG2,ANKH,BMPR2,CAV1,COL1A1,COL9A3,CRABP1,CXCL12,CXCL8,CXCR4,EDN1,EFNB2,EGFR,EMB,ENG,ENPP2,FGFR3,FOS,GADD45B,GJA4,HAMP,HSPB8,ICAM1,ID1,ID2,ID3,IGF1,LORICRIN,MSX1,NCAN,NFKBIA,NINJ1,NRCAM,SCD,SEMA3B,SERPINE2,SERPINF1,SLC3A2,SLC6A6,SMAD1,SMAD7,SOCS2,TLR4,TMEM100,TUBB3,VCAM1,YWHAH	1686 (17)
SREBF1	1.303	transcription regulator	Activated	2.694	4.50724	3.11e-05	ABCA1,ACACB,ACSL1,ACSS1,ACSS2,ADGRG1,AGMAT,AK4,ALDOC,APOBEC3F,AR,ARF4,BCL2,BCL2L1,BHLHE41,C5AR1,CAMK1D,CDKN1A,CEBPA,CEBPB,CEBPD,COL6A1,CTH,CXADR,CXCL10,CYB5A,CYP27B1,CYP51A1,CYP7B1,DBNDD1,DEPP1,DGKQ,DHCR7,EHHADH,ELOVL5,ELOVL6,ELOVL7,ETHE1,FABP6,FADS1,FAM189B,FBXO32,FN1,FOXO1,GCK,GPNMB,HAMP,HFE,HSD17B1,HSPA13,HSPA5,IDH1,IL10,IL12A,IL1A,IL1B,IL1R2,IL6,INSIG1,KCNA2,KLK3,LGALS3,LSS,MEF2C,MIOX,MLYCD,M…	1947 (19)
ROCK		group	Activated	2.693	2.8962	0.00127	ACTA2,APP,CAVIN1,CCL2,CCND1,CDKN1A,CNN1,COL1A1,CXCL8,DMD,ETS1,FN1,FOS,ICAM1,IL17A,LPP,MYLPF,NOS3,PPARG,RUNX2,SORT1,SOX9,THBS1,TJP1,VCAM1	1781 (19)
uric acid		chemical - endogenous mammalian	Activated	2.69	7.75203	1.77e-08	ACE,ANXA1,BCL2,BIRC5,BRCA1,CASP1,CCL2,CCL3,CCL3L3,CCL4,CD80,CD86,CDCA8,CSF2,CSF3,CXCL2,CXCL3,CXCL8,DDB2,E2F1,EIF2AK2,ESPL1,H2AX,ICAM1,IFIT2,IFIT3,IFNG,IL10,IL12B,IL13,IL17A,IL18,IL1A,IL1B,IL23A,IL4,IL6,IRF7,ISG15,ITGB3,KIF1A,MAPK13,MCM6,MDM2,NFKB2,NFKBIE,NLRP3,NOS3,POLB,PRIM1,PRKDC,RFC3,RSAD2,TACC2,TNF,TREM1,TTK,UBE2N,USP18,VCAM1	1118 (17)
PRKCZ	14.333	kinase	Activated	2.685	1.59688	0.0253	ABCA1,BCL2,CCND1,CD1D,CXCL8,ETS1,IL10,IL13,IL4,JUN,NFKBIA,NOS3,PSAT1,VCAM1,VEGFA
trinitrobenzenesulfonic acid		chemical reagent	Activated	2.682	2.99568	0.00101	ABCB11,BST1,CCL3L3,CCL4,CCR1,CCR5,CD44,CD68,COL1A1,CSF3,CXCL10,CXCL2,CXCL3,FABP6,FOS,IDO1,IFNG,IL10,IL12B,IL13,IL15,IL17A,IL18,IL1A,IL1B,IL1R2,IL23A,IL4,IL6,ITGAM,mir-210,NCF4,PTGS1,S100A9,SOCS3,TBX21,TIMP1,TNF,TNFRSF12A	1248 (13)
RORC	5.245	ligand-dependent nuclear receptor	Activated	2.681	1.40561	0.0393	ACACB,ACOT2,ADGRL1,ARSG,ATP1B1,BTLA,CCL20,CCNB1,CD28,CD36,CISH,CSF2,CXCL2,CXCL3,CYP7B1,ELOVL6,ELOVL7,FOXP3,GADD45B,GLS,GLS2,GSTM2,GSTM4,HSD17B7,IFNG,IL12RB1,IL17A,IL17RA,IL1A,IL1B,IL1R1,IL23R,IL2RA,IL32,IL6,KCNK5,LCN12,LPIN2,MC1R,ME1,MSC,NLRP3,OAT,PDK1,PFAS,PPP1R3C,PROCR,REL,RHBG,RORA,S100A9,SLC13A2,SLC15A4,SLC16A10,SLC25A24,SLC2A13,SLC2A3,SLC41A2,SLC7A2,SULF2,TNF,UGGT2,VEGFA,VLDLR
DSCAM	1.209	other	Activated	2.673	11.2958	5.06e-12	ARHGAP4,ATF5,BDNF-AS,CEBPA,CNTNAP1,CREB3,EFNA3,EFNB3,EMX1,ETV5,FRK,GRIN3B,ID3,IRS1,JAK2,JAK3,KCNA2,KCNJ2,KCNJ4,KCNK6,KLF4,KLF9,L1CAM,LHX2,MAP2,MICALL2,MYT1,NEFH,NEURL1B,NLGN2,NOS1,NOTCH3,NPAS3,NRCAM,NTNG2,NTRK2,PDGFA,PDGFB,PLCB1,PLD1,PLXNC1,PRKCB,PRKCH,RET,SEMA7A,SFRP1,SLC1A1,SNCAIP,SRGAP3,SYNPO,SYT12,SYTL4,TUBB3,TUBB4A,VGF,VIM,WNT16
HMGXB4	-1.553	other	Activated	2.673	3.29158	0.000511	AHNAK,CD274,DSE,HBEGF,ICAM1,IER5,IFIH1,IL27,KLF6,RNF19B,RNF213,TGM2,TNFAIP2,WFS1
LGALS1	1.148	other	Activated	2.67	6.58004	2.63e-07	ACTA2,ADAMTS4,AHR,ANG,ANK3,BEX2,CCNB1,CCND2,CCR1,CD69,CDKN1A,COL1A1,CXCL14,CXCL2,DHCR7,DISP1,EXTL2,FN1,GALNT16,GLI1,GPAT3,HBEGF,HLA-G,ICAM1,IFNG,IFNGR1,IL10,IL17A,IL1A,IL1B,IL2RA,IL6,INSIG1,LAT,LGALS3,NTRK2,PDCD1,SERPINE1,SMN1/SMN2,SNAI1,SOCS3,TFRC,TNF,TNFAIP3,TOX	1587 (13)
LIF	6.483	cytokine	Activated	2.666	5.85699	1.39e-06	A2M,ACTA2,AHNAK,BCL2L1,BCL3,CCL3L3,CCNA2,CCND1,CCNE1,CD34,CD9,CDKN1A,CEBPB,CEBPD,CISH,COCH,CSF1R,CXCL10,CXCL2,CXCL8,CYP17A1,CYP19A1,E2F1,E2F2,EGR1,ELF3,ENPP2,ERAP1,EREG,FBP1,FGF5,FN1,FOS,FOXP3,GATA4,GLUL,GPT,GRAMD2B,HBEGF,HES1,HES5,HEY1,HGF,HLA-G,HPSE,ID2,IFI16,IFNG,IGF1,IL17A,IL1B,IL2RA,IL6,IL6ST,IL7,IRF1,JUN,JUNB,KLF10,LARGE1,LIMS1,MEF2C,MSX1,MYH7,NKX2-5,NMI,PAX6,PECAM1,PLD1,POMC,POU5F1,PPARG,R…	1306 (17)
TGFA	-2.61	growth factor	Activated	2.664	7.71897	1.91e-08	AKT1,BCL2L1,BIRC3,BIRC5,CASP1,CCL2,CCL20,CCND1,CDKN1A,CEBPB,CSF2,CXCL10,CXCL2,CXCL8,E2F1,EGFR,EREG,ERRFI1,FOS,FOSL2,GJB2,GPER1,HGF,HSD17B1,ICAM1,IGFBP4,IL6,ITGAM,JUNB,LAMC2,MUC4,NES,PECAM1,PLA2G4A,PLAT,PRNP,PTGS1,RB1,S100A10,SERPINE1,SOX9,TLR5,TLR9,VEGFA,VIM,WNT5A	2002 (19)
GLIS1	-1.633	transcription regulator	Activated	2.664	0.465974	0.342	APOD,CHI3L1,COL6A2,CYP1B1,FBLN5,ITGA3,IVL,LOXL2,LOXL3,LTBP2,S100A9
CNTF	-1.17	cytokine	Activated	2.661	4.18046	6.6e-05	A2M,ACHE,APOD,ATF3,ATP6AP2,BDH1,C5AR1,CCR1,CCR5,CCRL2,CD247,CD69,CEBPD,CISH,CLEC7A,CNR1,CXCL8,CXCR4,DISP1,EDN2,EGR1,EGR2,ENPP2,FGF2,FGFR1,FOS,GABARAP,GLI3,GMFG,GPNMB,GPR65,GRN,HCAR2,HGF,HPGDS,IFI16,IGFBP7,IL1A,IL1RN,IL6ST,IL7R,IRF1,IRS1,JUNB,KCNK6,KCNMA1,KCTD12,KLF4,LGALS3,LIF,MCL1,NAMPT,NOTCH1,OXCT1,P2RX7,PDE1B,POMC,PPIB,PRL,RAB2B,RAB3C,REL,RIMS1,S100A6,SATB2,SCD,SLC15A3,SOCS1,SOCS2,SOCS3,STAT1,…	1275 (13)
Hif1		complex	Activated	2.661	1.97881	0.0105	ADM,ADRA1B,APLN,BCL2,BHLHE41,BIRC5,BNIP3,BNIP3L,CCNG2,CD24,CD83,CDKN1A,CXCR4,EDN1,EPO,EPOR,FN1,FOXM1,KCNA2,LOXL2,mir-210,NGB,PDK1,PPP5C,PRNP,S100A4,SERPINE1,TFRC,TNFRSF9,VEGFA
Lh		complex	Activated	2.657	5.49485	3.2e-06	ACP2,ACP3,ACP5,ACTA2,ACTG2,ACTN1,ACTR2,ADCY9,ADGRG1,AKAP12,AR,ARHGEF5,ARL4C,ARPC1A,AXL,BCL6,BDNF,BNIP3L,CASP4,CCND2,CD55,CDC42EP4,CDK14,CDKN1C,COL15A1,COL18A1,CREB1,CREBL2,CTNND1,CXCL8,CXCR4,CYP17A1,CYP19A1,DHCR7,DHRS3,DUSP1,DUSP3,EEF1E1,EGFR,EGR1,EREG,EZR,FDXR,FGFR4,FOS,GADD45B,GBP1,GEM,GNLY,GNRH1,GNRH2,GRK5,HSD11B1,HSD17B1,HSD17B7,IL6,INSL3,ITGA3,ITGB5,ITPR1,JUN,JUNB,KRT18,MAP3K5,MAPRE2,MCL1,MM…	2720 (23)
Wy 40905		chemical reagent	Activated	2.657	4.81531	1.53e-05	ACE,AGPAT1,ANXA5,AR,ATF3,BBS9,BTG2,CD68,CDKN1A,CREM,EGR1,EGR2,EPB41L4A,FOS,FOSL1,GADD45B,HADH,IER2,JUN,JUNB,KIFC1,KLF4,KLF6,MAZ,NFKBIZ,NOS3,RFX2,RGS2,RRAD,SERPINB9,SERPINE1,SLC6A4,SNN,SYNE4,UHMK1,ZFP36	1905 (16)
CSF2	3.694	cytokine	Activated	2.653	38.7167	1.92e-39	ABCA1,ABCG1,ACE,ACP5,ACTA2,ADA,ADGRE5,ADORA2B,ALOX5,ALOX5AP,ANLN,ANXA1,ARRB1,AURKA,BBC3,BCL2,BCL2A1,BCL2L1,BCL2L11,BCL3,BIRC3,BIRC5,BUB1B,C3,C4A/C4B,C5AR1,CA4,CARD16,CASP1,CCL2,CCL25,CCL3,CCL3L3,CCL4,CCNA2,CCNB1,CCND1,CCND2,CCNF,CCR1,CCR2,CCR5,CCR7,CCRL2,CD180,CD1A,CD1C,CD24,CD276,CD28,CD33,CD38,CD40,CD69,CD80,CD83,CD86,CDC123,CDC20,CDCA2,CDCA3,CDCA5,CDCA8,CDK1,CDKN1A,CDKN2B,CDKN2C,CEACAM1,CENPE,…	1793 (14)
E2F6	1.049	transcription regulator	Activated	2.646	2.95078	0.00112	BRCA1,CCL1,CCNE1,CDC7,CHEK2,DCTN4,DDX11,DHFR,E2F1,E2F2,EFNA5,GINS2,GMNN,KDM3A,MCM2,MCM3,MCM5,PCLAF,PODXL2,RBBP8,RFX5,RRM2,SERPINE1,SMC1A,SMC1B,SRSF1,STAG3,UNG,ZNF43	1757 (13)
TNNI3	-1.924	transporter	Activated	2.646	2.76195	0.00173	CCL1,CCL3L3,CCL4,CCR1,CCR2,CCR5,CXCL3,MYH7
GPAT4	1.061	enzyme	Activated	2.646	2.31426	0.00485	ATF3,DDIT3,ERN1,GPAT3,HSP90B1,HSPA5,XBP1
geneticin		chemical toxicant	Activated	2.646	1.98716	0.0103	BBC3,CDKN1A,DMD,HGF,MDM2,PLAT,XPC
(-)-norephedrine		chemical drug	Activated	2.646	1.13668	0.073	CYP51A1,DHCR7,LSS,MSMO1,MVD,NPC2,SQLE
valproic acid		chemical drug	Activated	2.643	13.5406	2.88e-14	ABCG1,ACSS1,ADCY1,AGPAT1,AKR1B1,AMFR,ANK3,ANTXR2,AR,ATAD2,ATF3,ATF6,ATP11A,ATP2B4,B4GALT1,BCL2,BCL2L1,BCL2L11,BDNF,BIRC5,BSPRY,C1QTNF6,C8orf44-SGK3/SGK3,CACYBP,CALR,CASP12,CBFA2T2,CCL2,CCND1,CCND2,CCR1,CD1A,CD36,CD40,CD44,CD80,CD83,CDC123,CDCA7,CDKN1A,CDKN1C,CEBPA,CENPM,CH25H,CHAF1B,CHEK1,CHPT1,CITED4,CKS1B,COCH,CREBBP,CROT,CRYL1,CTAGE9 (includes others),CTSB,CXADR,CXCR4,CYP17A1,CYP19A1,CYP1A1,CY…	2569 (19)
PI3K (family)		group	Activated	2.638	7.87943	1.32e-08	ABCA1,ABCG1,ACTA2,ADM,AKR1C1/AKR1C2,BCL2,BCL2L11,BIRC3,BIRC5,CCL2,CCNG2,CD274,CDKN2B,CTSD,CXCL10,CXCL12,CXCL8,CXCL9,CXCR4,DDIT3,EGLN3,FBXO32,FOS,FOXO1,FOXO4,GCLC,GCLM,GLI1,HAMP,HSPA5,IFIT1,IL10,IL12B,IL17A,IL1B,IL6,ISG15,ITGA6,ITGB1,KLF2,MCL1,NQO1,PDGFB,PRKCZ,PTGS1,PXN,RDH10,SERPINE1,SIAH2,SLC4A7,TGM2,THBS1,TJP1,TNF,TNFRSF10B,TNFSF10,TP73,VEGFA	2158 (19)
linoleic acid		chemical - endogenous mammalian	Activated	2.635	1.69897	0.02	ABCA1,ANGPTL4,APP,CD36,CLU,CPT1B,DDIT3,DUSP1,EDN1,HSP90B1,HSPA5,ICAM1,IL1B,IL6,MTTP,NCF1,NEDD4L,NFKBIA,NOS3,OLR1,PECAM1,PLIN4,PPARD,S100A9,SCD,UCP2,VCAM1,VEGFA
BTC	3.421	growth factor	Activated	2.63	1.13668	0.073	CCL20,CXCL8,EREG,IL6,ITGAM,PRL,TNFAIP6
IFNAR1	1.064	transmembrane receptor	Activated	2.623	13.1057	7.84e-14	ASS1,ATF3,AXL,B2M,BCL2L14,CCL20,CCL3L3,CCL4,CD274,CD40,CD86,CGAS,CH25H,CIITA,CLIC5,CSF1,CXCL10,CXCL13,CXCL2,CXCL3,EIF2AK2,FN1,GBP4,GPT,HLA-A,HSH2D,IDO1,IFI16,IFI44,IFI6,IFIH1,IFIT2,IFIT3,IFITM1,IFNG,IFNGR1,IFT57,IL10,IL12A,IL12B,IL15,IL17A,IL18,IL1A,IL1B,IL27,IL6,IRF1,IRF7,ISG15,LAMP3,LIF,mir-223,MX2,OAS1,OAS2,OAS3,OASL,PLAT,RSAD2,RTP4,SDC1,SEPTIN4,SERPINE1,SLFN12L,SMAD7,SOCS1,SOCS3,SQLE,STAT1,TA…	1186 (14)
collagenase		group	Activated	2.623	7.01278	9.71e-08	ADM,CCL3L3,CCL4,CEBPB,CEBPD,CXCL10,CXCL12,CXCL2,CXCL3,EGR1,FOSL1,ICAM1,IER3,IL1A,IL1R1,IL6,IRF1,ITGA4,JUN,JUNB,STAT3,TNF,VCAM1	1324 (10)
MAFB	-1.013	transcription regulator	Activated	2.622	4.04479	9.02e-05	ACTN1,ADA,ALCAM,ARHGDIA,CCL2,CCL4,CCND2,CD163L1,CD28,CD2AP,CD38,CMKLR1,CRYBB1,CXCL12,CXCL2,CXCL9,EFNA3,EGLN3,EGR2,F13A1,F2RL3,FBLN5,FCGBP,FOXO1,HOXA3,HOXB3,HS3ST1,HTR2B,IGF1,IL10,IL18BP,IL7R,ITGB7,JCHAIN,LGALS3,LGI3,LGMN,LILRB5,MARCKS,MTSS1,NFATC1,NUAK1,OSCAR,PRDM1,PTGIR,RADX,SCG5,SELENOP,SERPINB2,SLC9A9,TMEM119	960 (7)
PRKCQ	2.09	kinase	Activated	2.621	8.37469	4.22e-09	BCL2L1,CCND1,CD44,CD69,CDKN1A,EZR,FOSL1,FOXP3,GATA3,IFNG,IL10,IL13,IL17A,IL24,IL2RA,IL4,IL6,ITGB1,NFKB2,PRKCB,PRKCE,PRKCH,RB1,STAT3,TBX21,TNF,TNFRSF4	1383 (14)
Il8r		group	Activated	2.621	1.7167	0.0192	BCL2,BCL2L1,CR2,CXCL8,EGFR,ITGAM,ITGAX
CSF2RB	-3.364	transmembrane receptor	Activated	2.621	1.56703	0.0271	BCL2,BCL2L1,CCND2,FOS,IL6,ITGAM,JUN,JUNB,MAFG
Pro-inflammatory Cytokine		group	Activated	2.618	3.42597	0.000375	ADM,AICDA,AKR1B1,APOE,ASS1,CD55,CLU,CR1L,CSF2,CXCL13,EPO,FGF2,GCLC,GLUL,HAMP,HDAC6,HSPA5,ICAM1,IL6,ITGA1,LGALS9,LIPG,OLR1,SDC4,SLC6A4,SOCS3,SPINT1,TIMP1,TLR2,TSLP,UBD,VCAM1	1902 (20)
TAC4	-1.992	other	Activated	2.615	3.2644	0.000544	CD80,CD86,IFNG,IL17A,IL1B,IL6,PRDM1,TNF,TNFSF15,XBP1	1212 (14)
prostaglandin D2		chemical - endogenous mammalian	Activated	2.612	7.74958	1.78e-08	AHR,CCL3,CCND1,CD44,CSF1,CSF2,CXCL10,CXCL8,EDARADD,ESR2,GFI1,IFNG,IL13,IL1A,IL4,IL6,ITGAM,MYADM,NFATC1,NINJ1,P2RX7,PLAUR,PPARG,PRDM1,PRL,PTGS1,RBPJ,SDC4,SERPINE2,SOX8,SRC,TG,TNF,TNFRSF11B,TNFRSF12A,TNFSF11,VDR	1387 (16)
PBX1	2.65	transcription regulator	Activated	2.608	1.84164	0.0144	ANGPT2,CDKN1A,CDKN2B,COL1A1,FGF2,GCK,GNRH1,HOXA3,HOXB2,IL10,NEUROG3,OSBP,PLAU,STAT3,TCF7L2,UGT2B17
METRNL	1.067	other	Activated	2.607	0.872895	0.134	ACSL1,CCL3L3,CCL4,CXCL2,IL10,IL4,IL6
TRAF3IP2	1.118	enzyme	Activated	2.606	3.79588	0.00016	ACE,CCR2,CCR3,CEBPD,COL1A1,CSF1,CSF2,CSF3,CX3CL1,CXCL10,CXCL2,CXCL3,DEFB4A/DEFB4B,FGF2,GATA3,GFI1,ICAM1,IFNG,IL11RA,IL13,IL17A,IL18,IL19,IL1B,IL4,IL6,ISG15,NFKBIZ,TNF,TNFRSF12A,TP63,TRAF4,VCAM1,ZC3H12A	1405 (12)
MAP3K3	-1.09	kinase	Activated	2.604	1.24489	0.0569	BCL2,CXCL8,FOS,IFNG,IL10,IL6,JUN,MYH7,TGFB3,TGFBR3,TNFAIP3
CXCL2	28.199	cytokine	Activated	2.602	4.65561	2.21e-05	BCL2,CCL3L3,CCL4,CXCL10,CXCL2,CXCL3,CXCR2,ICAM1,IL17A,IL1B,IL6,ITGAM,TMPRSS2,TNF	1131 (15)
E. coli serotype 0127B8 lipopolysaccharide		chemical - endogenous non-mammalian	Activated	2.6	12.6402	2.29e-13	ACSS1,ADGRG2,ALDH1L1,ANXA1,AQP9,BDNF,BRIP1,CASP6,CAV1,CCL2,CCRL2,CD40,CELSR2,CHST11,CHST7,CXCL10,CXCL12,CXCL2,CXCR4,DDIT3,DERL2,DNAJC3,DOK1,EDEM1,EDNRA,EDNRB,EGR2,F2R,FGF2,FZD1,FZD2,GDNF,GJB2,GLUL,GMPR,GNA13,GNG7,GPER1,GPR146,GPR19,HCAR2,HSPA5,IGF1,IL10,IL12B,IL15,IL1B,IL23A,IL24,IL6,IL7,IRF1,IRF5,ITPK1,JAK2,KLF2,LAMB2,LAMC1,LAMC2,LGALS3,LIF,LOX,LPAR4,NCALD,NCAN,NFKBIA,NOS3,NOTCH3,NTRK2,OPN3,P2RY…	1516 (14)
highly active antiretroviral therapy		chemical drug	Activated	2.596	3.22113	0.000601	BCL2,CCR5,CD4,CXCR4,IL2RA,IL6,IL7,IL7R,TNF	1340 (14)
ETS1	-1.36	transcription regulator	Activated	2.595	15.3242	4.74e-16	ABCB1,APOC2,ARHGDIB,ARL4C,BCL11A,BCL2L1,BMP4,BRCA1,CASP1,CAV1,CCDC90B,CCL2,CCND1,CCNE1,CCNG1,CCR8,CD27,CD44,CD69,CDK11A,CDK6,CDKN1A,CITED2,COL2A1,CRTAM,CSF1R,CSF2,CX3CL1,DIAPH1,EGR1,ERBB2,ETS1,ETS2,FCGR2A,FGFR4,FLI1,FLT1,FN1,FOXP3,GZMK,HGF,HPSE,HS2ST1,HSPA1L,HSPA8,HSPB8,HSPE1,ICAM1,ID2,IFNG,IKZF2,IL10,IL12A,IL12B,IL13,IL17A,IL24,IL2RA,IL2RB,IL4,IL7R,INSIG1,ITGA10,ITGAE,ITGAM,ITGB3,ITK,JAK1,JUNB,K…	2352 (22)
dimethyl sulfoxide		chemical drug	Activated	2.594	6.43415	3.68e-07	ALOX5,ANXA1,B3GNT8,BIRC5,BMP4,BNIP3,CALR,CCND2,CEBPB,CNR2,COL22A1,CXCL8,CXCR5,CYP1A1,DDIT3,DNAJB4,EIF4EBP1,EPOR,FGF8,FOS,FUT8,GATA4,HEBP1,IFI16,IL1B,ITGAM,JUN,KIF3C,MEF2C,MYH6,MYH7,MYL4,NCF1,NKX2-5,NR2F2,NUPR1,PBXIP1,PDZD2,PLD1,PLD2,PRKX,PTGS1,PTK2B,RUNX2,SGMS2,SLC8A3,SMPD3,SPI1,SPNS2,SQSTM1,SRC,STAR,TERT,TFRC,TNF,TNFRSF11B,TNFSF11,TNNC1,UBE2L6,VCAM1,VLDLR	1853 (17)
carfilzomib		biologic drug	Activated	2.593	1.01547	0.0965	ATF3,DDIT3,E2F1,ERN1,HSP90B1,HSPA5,IL1B,IL6,TNF,TNFSF11
IGF1	1.62	growth factor	Activated	2.588	10.109	7.78e-11	A2M,ABCA1,ACSS2,ACTA2,ADA,ADM,ADORA2B,AKR1B1,AKR1C1/AKR1C2,AKT1,AMIGO3,ANGPT2,APLF,APP,AXL,BBC3,BCL2,BCL2A1,BCL2L1,BCL2L11,BDNF,BIRC3,BIRC5,BMP4,BRCA1,BTG2,C4A/C4B,CCDC80,CCL3L3,CCL4,CCNA2,CCNB1,CCND1,CCND2,CCNE1,CCNG1,CCNG2,CD44,CDK1,CDKN1A,CEBPB,CEBPD,CGNL1,CHGA,CISH,CITED2,CLEC11A,CLU,CNN1,COL1A1,COL20A1,COL2A1,CREB1,CSF1,CTSD,CXCL8,CYP17A1,CYP19A1,CYP1B1,CYP27B1,DDIT3,DEFB4A/DEFB4B,DMD,DUSP1,…	2853 (23)
epirubicin		chemical drug	Activated	2.588	2.00877	0.0098	ABCB1,BCL2,CAV1,CCND1,DUSP1,EZR,FOXM1,IL1B,IL6,TNFRSF10B,WNT6	1804 (20)
PPP1R1B	1.293	phosphatase	Activated	2.586	0.872895	0.134	BCL2,BCL2L1,CCND1,CD44,ERBB2,FOS,LRRK2
HSPB8	-36.394	kinase	Activated	2.584	2.03245	0.00928	ACSL1,BAG3,BMP4,BMPR2,CCL2,CD36,CXCL8,ICAM1,IL6,MITF,PDK1,PFKFB2,PPARA,PPARG	1711 (17)
lipid A		chemical toxicant	Activated	2.583	5.07831	8.35e-06	ABCA1,AICDA,C3,CCL2,CCL3L3,CD36,CD40,CD86,CGAS,CSF3,CXCL10,CXCL3,CXCL8,FCGR2B,IL10,IL12B,IL13,IL1B,IL6,ITGA5,LYN,OLR1,PTPRC,THBS1,TLR3,TNF	1627 (15)
SP2509		chemical reagent	Activated	2.58	15.2204	6.02e-16	ABCB10,ABCC4,AMOT,AR,ATP7A,BCL11A,BDNF,BUB1B,CAMSAP3,CBFA2T2,CCNA2,CCND1,CCND2,CD274,CD58,CDCA7,CDH2,CDK5R1,CDK6,CENPF,CREB1,CREBBP,CSE1L,CTBP2,CXCL10,CXCL9,DDR2,DHRS3,DNM3,DNMT3A,DOK4,DPYSL4,DSG2,E2F3,E2F8,EFNA3,EFNB1,EFNB2,EFNB3,EGFR,EHD1,EHMT2,EIF2AK2,EIF4E,ELF4,ELOVL6,ERBB2,EZR,FES,FEZ1,FGF2,FGFR1,FLRT3,FN1,FOXC1,GAP43,GDI1,GDPD5,GLI3,HDGF,HDGFL3,HMGA2,HMGB1,HMGN5,HNRNPA2B1,HNRNPD,HOXA10,HOXB…
LGALS8	1.829	other	Activated	2.58	2.31426	0.00485	CCL2,CDKN1A,CSF2,CXCL3,CXCL8,IL6,VWF	1721 (16)
CCL3	6.386	cytokine	Activated	2.579	7.48812	3.25e-08	APOBEC3G,CCL2,CCL20,CCL3,CCL4,CCR1,CCR5,CXCL9,FOS,IFNG,IL1B,IL6,ITGA5,ITGAM,ITGB1,RYR3,STAT1,STAT3,TNF,TNFSF11	1414 (18)
VAV2	1.032	transcription regulator	Activated	2.578	0.769551	0.17	AGTRAP,BCL2,BCL2A1,CCNE1,CD69,FOS,HBEGF,HGF,IL6,REL,VIM
TLR7/8		group	Activated	2.577	6.16115	6.9e-07	ATP2B1-AS1,BCL2,BCL2A1,CA2,CCL2,DNAAF1,EDN1,EREG,GEM,IL10,KCNMA1,MCOLN2,NFKBIA,NFKBIZ,NPR1,PLAUR,PNRC1,RECQL4,REPS2,RGS1,RGS20,SLC7A11,TNF,TNFAIP3,TNFAIP6,VDR	1632 (13)
IL22	1.904	cytokine	Activated	2.577	2.51713	0.00304	ABCG1,ACTA2,AKT1,B3GNT7,BCL2,BCL2L1,BCL3,C3,CCL1,CCL20,CCL22,CCL3L3,CCL4,CCND1,CD274,CXCL10,CXCL12,CXCL13,CXCL2,CXCL3,CXCL8,CXCR2,DEFB4A/DEFB4B,GPT,HBEGF,HSPA5,IFNG,IL10,IL12B,IL13,IL17A,IL19,IL1A,IL1B,IL23A,IL24,IL36G,IL4,IL6,IVL,LORICRIN,MCL1,MUC1,MUC4,PDGFA,PLA2G4E,PTGS1,S100A9,SOCS3,STING1,TNF,TNFSF11,TSLP,WFDC5	1294 (16)
SCAP	-1.054	other	Activated	2.574	2.10735	0.00781	ABCA1,ABCA3,ACACB,ACSL1,ACSS2,ALDOC,ATF3,ATF5,CSF1R,CYB5A,CYP51A1,DDIT3,DHCR7,EHHADH,ELOVL6,HES6,HSD17B1,ID1,INSIG1,LGALS3,LSS,MSMO1,MVD,OLR1,PDK1,PLA2G4C,PMVK,PTGER4,RDH11,SCD,SQLE,SQSTM1,STARD4,TM7SF2	1423 (13)
PDGFC	-21.1	growth factor	Activated	2.574	0.616185	0.242	ACTA2,CCND1,FGF2,FLT1,PDGFRA,PDGFRB,TIMP1,VEGFA
NRG1	-1.023	growth factor	Activated	2.573	10.4841	3.28e-11	ABCA1,ACAT1,ACHE,ACTN1,AMOTL2,ANGPT2,AR,ARTN,AXL,BCL2,BCL2L1,BDNF,BIN1,BNIP3,BRCA1,CAV1,CAVIN1,CCND1,CCND2,CCNE1,CDC20,CDKN1A,CDKN2C,CKS2,COL1A1,COL4A3,CRIM1,CXCL8,CXCR3,CXCR4,DAD1,DAG1,DDIT3,DNAJB2,DUSP1,E2F1,EDN1,EGR1,EGR2,EGR3,ELF3,EMP2,EPHA2,ERBB2,ERBB3,ERRFI1,ESR2,ETV5,FGF2,FN1,FOS,FOSL1,FSCN1,FSCN2,GAD1,GAS6,GATA4,GDA,GLG1,GLS,GPER1,GRB7,GRIN2C,HES1,HMGA1,HMMR,ID1,IER2,IER3,IL10,INSL3,ITGAM…	2089 (22)
S-(2,3-bispalmitoyloxypropyl)-cysteine-GDPKHPKSF		chemical reagent	Activated	2.573	3.03198	0.000929	CCL2,CCL4,CD40,CD80,CD86,CXCL10,CXCL8,ICAM1,IFNG,IL6,SERPINE1,SLC46A1,TLR2,TNF	1326 (14)
geranylgeranylacetone		chemical drug	Activated	2.572	1.62342	0.0238	BCL6,EIF2AK2,HMGB1,MITF,MX1,PRDM1,SOCS3,STAT3
NF-Y		complex	Activated	2.567	3.35655	0.00044	ABCB1,B2M,CBS/LOC102724560,CCNA2,CCNB1,CCNB2,CDC25C,CDK1,CHRNB4,COL1A1,COL5A3,DDIT3,E2F1,GADD45A,GAS6,GHR,GUCY1B1,HOXB4,HSPA5,JUNB,MTAP,MYBL1,NPR1,PDGFRB,PGM3,PROS1,RRM2,RWDD2A,SHOX2,SLC8A2,STAR,TERT,TOP2A,VLDLR,VWF,XBP1
CD36	2.222	transmembrane receptor	Activated	2.566	3.97062	0.000107	ADAMTS4,ATF6,AXL,CCL1,CCL20,CD86,COL1A1,CSF2,CSF3,CXCL3,CXCL8,DDIT3,DEFB4A/DEFB4B,ERN1,FGF2,HSP90B1,HSPA5,ICAM1,IFNG,IGFBP4,IGFBP7,IL10,IL13,IL15,IL1A,IL1B,IL6,IRAK1,ITGAM,LIF,LRP1,MTTP,NLRP3,PDGFB,PLAU,PLAUR,PNPLA2,PPARG,SCD,SERPINB2,SERPINE1,TNF,TNFRSF10B,TNFRSF10C,TNFRSF11B,XBP1	1894 (13)
BAX	1.218	transporter	Activated	2.566	2.8962	0.00127	BCL2,BCL2L11,BIRC2,CCNB1,CDC25C,CDK1,CDKN1A,CTSB,CTSD,CTSS,CXCL10,DNAJB2,DNAJB9,EDEM1,HLA-A,IFITM2,IL15,IL6,IRF7,JAK1,TGM2,TIMP1,TNF,TRIM6-TRIM34,XBP1	1893 (22)
progesterone		chemical - endogenous mammalian	Activated	2.552	22.2725	5.34e-23	ABCB1,ABCB4,ABCG2,ACAT1,ACE,ACP3,ACP5,ACRBP,ACSL1,ACTA2,ADARB1,ADM,ADRB2,AEBP1,ANKH,APOD,APOE,AR,ARID5A,ARL14,ARL4A,ATF3,ATP1B1,AURKA,B3GALNT1,BCL2,BCL2L1,BCL6,BDNF,BHLHA15,BIRC3,BMP2K,BRCA1,C3,C5AR1,CA2,CADM1,CAV1,CCL1,CCL2,CCL20,CCL22,CCL25,CCNA2,CCNB1,CCNB2,CCND1,CCNE1,CCNG1,CCR2,CCR3,CCR5,CD1D,CD36,CD40,CD82,CD86,CDC25C,CDH2,CDKN1A,CDKN2B,CDT1,CEBPB,CEBPD,CHAF1A,CHAF1B,CIDEC,CITED2,CKMT1A/CKM…	2331 (17)
ITK	1.713	kinase	Activated	2.55	6.88941	1.29e-07	AHR,BIK,CCR8,CD4,CD44,CD7,CPNE7,CRIM1,CX3CR1,CXCL8,CYSLTR2,EOMES,F2R,FOS,FOXP3,GATA3,HLA-A,IFNG,IFNGR1,IL10,IL10RA,IL13,IL17A,IL18RAP,IL2RB,IL4,ITGA1,KLRC1,KLRD1,LAT2,LPAR6,LYN,MYO1F,NCR1,PRKCB,SAMD3,SCIMP,SLAMF7,SPRY2,SRGAP3,STAT4,SULF2,TBX21,TNF,TNFSF10,XCL1	1647 (16)
PLCE1	1.946	enzyme	Activated	2.55	3.2644	0.000544	CCL2,CCL20,CCR2,CXCL2,CXCL3,CXCL8,CXCR2,IFNG,IL6,TNF	1157 (15)
TP53COR1		other	Activated	2.55	1.6968	0.0201	BBC3,BIRC3,CASP1,HIPK1,IL1B,MDM2,PLK2,RRM2B,TNFRSF10B,TOP2A
TLN1	1.073	other	Activated	2.546	3.50446	0.000313	BCL2,CCL4,CXCL10,GBP2,HLA-A,ICAM1,IL1A,IL1B,IL2RA,IL6,ITGA1,ITGA5,ITGAM,ITGB1,MCL1,TNF	1493 (20)
exenatide		biologic drug	Activated	2.546	1.07417	0.0843	ABCA1,CASK,CREBBP,FOS,ICAM1,IL10,IL4,IL6,ITGAM,NEUROG3,PAX6,PCSK1,POMC,SFTPA1
AGN194204		chemical drug	Activated	2.542	14.0872	8.18e-15	ABCA1,ABCG1,ADAM19,AHR,ANGPTL4,ANXA2,ARL4C,ASS1,ATF3,AURKA,BCL2A1,BNIP3L,BZW2,CA2,CAMK2D,CCL3L3,CCL4,CCNA2,CCNB1,CCNG2,CD6,CDK1,CDKN1A,CDKN2C,CEBPA,COL6A2,COTL1,CSF2,CYB5A,CYP51A1,CYP7B1,DENND5A,DHCR7,DUSP1,ELOVL5,FURIN,GADD45A,GAPDH,GATA3,GBP2,GBP3,GFI1,GNAI1,GPR65,GPRC5A,H2AX,H2AZ1,HIC1,HTRA3,ICOS,IFITM3,IL12RB1,IL13,IL17A,IL1R2,IL2RA,IL2RB,IL4,IL4R,IL7R,IRF1,ITGB7,ITM2A,KANK3,KIF20A,KIF2C,KIF4…	1873 (17)
MTORC1		complex	Activated	2.542	0.309804	0.49	AHR,CCND1,CYP17A1,ELF4,FOXP3,IFNG,IL17A,IL4,INSIG1,KLF4,MOG,NFE2L1,SCD,TNF,UCHL1
DPP-23		chemical reagent	Activated	2.538	1.88273	0.0131	DDIT3,DNAJB2,DNAJB4,DNAJB9,ERN1,HSP90AA1,HSPA5,PADI1,SYVN1,XBP1
MDK	-1.146	growth factor	Activated	2.535	2.68825	0.00205	ACE,ACTA2,BCL2,CCL2,CCL3,CSF1,CXCL3,FOSL1,GZMB,IL1B,IL6,LIF,PLAT,PTPRC,S100A6,S100A9,TNF,WNT5A	1265 (17)
betamethasone		chemical drug	Activated	2.534	1.24642	0.0567	ABCB1,ASPA,CAV1,GCLM,IDO1,NOS3,NQO1,NR3C1,SRGAP3,TGM2
vinblastine		chemical drug	Activated	2.531	2.68825	0.00205	ABCB1,AR,CCNG1,CD40,CD80,CD86,CDKN1A,CHST4,CYP1A1,DVL1,FBXW7,FOS,HLA-A,IGFBP4,IL1B,IL6,MCL1,TNF	1165 (17)
emactuzumab		biologic drug	Activated	2.53	4.86967	1.35e-05	GBP4,IFIT1,IFIT3,IFITM3,IRF9,ISG15,SOCS1,STAT1,STAT2,XAF1
HECTD2	1.411	enzyme	Activated	2.53	2.32698	0.00471	B2M,CDK6,CXCL10,FN1,IL6ST,ITGA5,NR3C1,PMEL,PTGS1,TNFAIP2
STS	-3.661	enzyme	Activated	2.53	2.15552	0.00699	APOC2,CD68,CEBPD,IGF1,IGFBP2,IL1B,IL6,IRS1,LIPE,MYLK,PNPLA2,PPARG,TNF,UCP2,XBP1	1473 (16)
Peg13		other	Activated	2.53	0.744727	0.18	GAD1,GALR2,GLS,GPER1,GRIA3,GRIN1,GRIN2C,NIBAN2,PEG3,SNRPN
TNFSF14	-1.26	cytokine	Activated	2.528	2.68825	0.00205	ADORA2B,BCL2L1,BIRC3,CCL19,CCL20,CD40,CD86,CSF2,CXCL10,CXCL12,CXCL3,ICAM1,IFNG,IL13,IL6,NT5E,TNF,VCAM1	1488 (14)
carbon tetrachloride		chemical toxicant	Activated	2.526	4.54516	2.85e-05	ABCC4,ACTA2,AK4,ANGPT2,APOE,ARRB1,ASS1,ATF3,BCL2L1,BCL2L11,BIRC3,BMP3,CCL3L3,CCL4,CCND2,CCR1,CCR5,CD38,CD68,CD86,CDKN1A,CEBPB,CEL,CNR1,CNR2,COL1A1,CREBBP,CX3CR1,CXCL10,CYP1A1,DAGLA,DDIT3,DHFR,DUSP1,FGFR4,FKBP1A,FN1,FOS,FOXM1,GADD45A,GADD45B,GBP5,GCLC,GDF15,GSTM1,HDGF,HGF,HSP90AA1,HSPD1,ICAM1,IFNG,IGF1,IGF2R,IGFBP5,IL13,IL1B,IL6,INHBE,ITGB1,JUN,JUNB,ME1,mir-29,MKI67,NQO1,PDGFA,PDGFB,PDGFC,PDGFD,PD…	2193 (18)
F2RL1	3.617	G-protein coupled receptor	Activated	2.525	4.22768	5.92e-05	ABCG2,ACTA2,ATF3,BCL3,BDNF,CAV1,CCL2,CSF2,CTSD,CXCL2,CXCL8,FAM210B,FGF5,FOS,GBP2,GBP4,GBP6,HBEGF,IFNG,IL10,IL13,IL1A,IL1B,IL4,IL4R,IL6,IRF8,ITGA7,let-7,LIF,MSC,NT5E,PKIB,RAB27A,RARG,SERPINB2,STING1,TECTA,TIMELESS,TNF,TRPA1,TSLP,VEGFA,VGF,WWOX	1635 (15)
GNAQ	-25.07	enzyme	Activated	2.523	9.12552	7.49e-10	ABCB1,ADM,AK4,ATF3,BMP4,BNIP3,BNIP3L,BTG2,C15orf48,CCND1,CCNG1,CD44,CITED2,CLCF1,CNN1,CREM,CSPG4,CX3CL1,CXCL12,CXCL3,CXCL8,DPYS,DUSP5,EDN1,EDN2,EGR1,FOS,FOSL1,GADD45A,GALE,GAS6,GBP2,GJA4,GNAQ,HSPB8,IFNG,IL1RN,IL6,INSIG1,KLHL41,LGALS3,LGR4,LMCD1,MAPK11,MGST1,MYH7,NOX5,NPR3,OAS1,OLR1,PDK1,PLAT,PLAUR,PLCB1,PLSCR1,PRKCE,PRKG2,PYGL,RHOB,SERPINE1,SGK1,SH3BP5,SLC8A1,SLCO4A1,SOCS3,SPHK1,STAR,STAT1,THBD,T…	1309 (14)
resiquimod		chemical drug	Activated	2.517	37.3242	4.74e-38	AIF1,AIM2,ANXA4,APOBEC3D,APOBEC3G,APOL3,ATF3,ATF6,BCL2,BCL2A1,BMP6,BST2,C3,C4A/C4B,CASP4,CCL1,CCL19,CCL2,CCL20,CCL22,CCL3,CCL3L1,CCL3L3,CCL4,CCL4L1/CCL4L2,CCR1,CCR7,CCRL2,CD40,CD44,CD83,CD86,CEBPB,CHST2,CIITA,CLEC7A,CREB5,CSF1R,CSF2,CSF3,CXCL10,CXCL12,CXCL13,CXCL2,CXCL3,CXCL8,CXCL9,DDIT3,DDX60,DLL4,DNAJB9,DNAJC3,EBI3,EIF2AK2,ELF3,ETS2,F2R,FCER2,FCGR2A,FCGR2B,FGF2,GATA3,GBP1,GDF15,GM2A,GPX1,HAVCR2…	1400 (14)
GNAI3	1.097	enzyme	Activated	2.515	3.8962	0.000127	CCL1,CCL2,CCL3,CCL3L3,CCL4,CSF1,CSF2,CXCL3,CXCL8,IL24,IL6,RGS19,TNF,VEGFA	1477 (18)
IL6R	-2.195	transmembrane receptor	Activated	2.513	3.80134	0.000158	A2M,ABCC3,ACTA2,BCL2L1,CCL2,CCL20,CCL3,CCNE1,CD36,CDKN1A,COL1A1,COL2A1,CTSB,CXCL10,CXCL2,CXCL3,CXCL8,EPO,FN1,GREM1,ICAM1,ICAM3,IGF1,IGFBP5,IL10,IL1B,IL6,IL6R,IL6ST,IRF1,MCL1,NAMPT,SOCS3,STAT3,TIMP1,TNF,TNFRSF11B,TNFSF11,VCAM1,VEGFA	1265 (14)
NFATC2	-1.096	transcription regulator	Activated	2.505	22.7545	1.76e-23	ABCA1,ACP3,ACP5,AXL,BBX,BCL2L1,BCL2L11,CASP4,CCL22,CCL3L3,CCNA2,CCNB1,CCNE1,CCNF,CCR5,CCR7,CCR9,CD274,CD40,CD80,CD83,CD86,CDH2,CDKN1A,CISH,CITED2,COL2A1,CSF2,CTNNAL1,CX3CL1,CX3CR1,CXCL10,CXCL2,CXCL3,CXCR5,EBI3,EDN1,EGR2,EGR3,ENPP2,FCER2,FGL2,FOXM1,FOXP3,GATA3,GBP4,GPNMB,HDAC1,HELZ2,ICOS,IER3,IFIT2,IFIT3,IFNG,IKZF1,IL10,IL12A,IL12B,IL12RB2,IL13,IL15,IL17A,IL18,IL1A,IL1B,IL27,IL2RA,IL4,IL6,IRF1,IRF…	1711 (13)
STAT2	1.821	transcription regulator	Activated	2.5	11.3261	4.72e-12	BCL2,CAV1,CCL19,CD40,CD86,CIITA,CXCL10,CXCL8,GBP1,GBP6,GLI1,IFI27,IFI35,IFI6,IFIT1,IFIT2,IFIT3,IFITM1,IFITM2,IFNG,IL10,IL12A,IL6,IRF1,IRF5,IRF7,IRF9,ISG15,MX1,OAS1,OAS2,PITX2,RSAD2,RTP4,SOCS1,SOCS3,STAT1,TNF,TNFSF10,USP18,WARS1,ZBP1	1612 (16)
seocalcitol		chemical drug	Activated	2.499	4.06349	8.64e-05	AKT1,BCL2,BCL2L1,BIRC5,CACNA1D,CDKN1A,CEACAM1,CKS1B,E2F1,FOSL1,GADD45A,IGFBP5,IL24,ITGA7,KRT86,LGALS2,LRP1,MCL1,MST1,NINJ1,PDGFRB,RAB1A,SGK1,SLC9A3R1,SSPN,STAT3,TFAP4,TMPRSS2,TSPAN6,VDR,VEGFA	2042 (26)
IL17RA	1.503	transmembrane receptor	Activated	2.497	2.86967	0.00135	CCL20,CCR1,CSF3,CSF3R,CXCL12,CXCL2,CXCL3,CXCL8,CXCR2,HAMP,IL13,IL17A,IL1A,IL1B,IL6,S100A9,TIMP1,TNF	1247 (16)
TAC1	1.946	other	Activated	2.497	2.29414	0.00508	CASP1,CCL2,CCL4,CLEC11A,CSF2,CUX2,CXCL10,CXCL3,CXCL8,CXCR4,EGFR,FOS,GNRH1,IFNG,IL17A,IL1A,IL1B,IL1RN,IL4,IL6,KCND2,NCR1,NOS1,PDE1C,PLAT,PNOC,PRL,SERPINB2,SERPINE1,SERPINI1,TNF,TNFRSF11B,TNFSF11,TNFSF15,ZFPM1	1412 (17)
ATP7B	-2.413	transporter	Activated	2.496	0.838632	0.145	APP,CCNG1,CDC20,CKS1B,CYP51A1,ELOVL6,LSS,MAD2L1,MSMO1,PPARA,SMC2,SMC4,SQLE,TRIP13
TNFSF13B	3.275	cytokine	Activated	2.493	14.0825	8.27e-15	ADAMTS12,ADORA2A,AICDA,APLN,ARCN1,ASS1,AURKB,BCL2,BCL2A1,BCL2L1,BCL2L11,BCL6,BTLA,C3orf33,CCL2,CCL4,CCND2,CCR1,CCR7,CD200,CD274,CD40,CD80,CD83,CD86,CELSR2,CLEC4M,CR2,CSF2,CTSS,CTTN,CXCL8,CXCR5,DDR2,DUSP5,ECT2,EFNA5,FCER2,FCGR2B,FOSL1,FOXO1,GAS6,GPR183,HAVCR2,HCAR2,HLA-DQA1,HSH2D,ICAM1,ICOSLG/LOC102723996,ID1,IL10,IL15,IL18RAP,IL1RN,ITGA1,JUN,MAGED1,MAP3K14,MCL1,NAMPT,NFKB2,OCSTAMP,P2RX1,PGF,PIM2,…	1808 (14)
KAT5	-1.099	transcription regulator	Activated	2.493	1.21042	0.0616	BBC3,BIRC2,CACNB2,CCND1,CCND2,CD82,CDKN1A,COL2A1,CXCL8,CXCR4,DPH6,EGFR,EOMES,EPG5,EREG,GPC5,HOXA9,HSPD1,IFNG,IGFBP5,IL10,IL6,KLK3,MAD2L1,MICALL2,MNDA,NT5E,OPRK1,PIAS2,POLI,PRL,PRR5L,RAG1,RGS1,SCN2A,STX17-DT,TP63
ICOSLG/LOC102723996	-1.885	other	Activated	2.491	1.91009	0.0123	CD28,CSF2,FOXP3,ICOS,ICOSLG/LOC102723996,IFNG,IL10,IL12B,IL13,IL1B,IL4,IL6,TNF
SASH1	3.131	other	Activated	2.48	11.6289	2.35e-12	ACP3,ARID5A,BBX,CCL4,CCND2,CD40,CITED2,CXCL10,EDN1,FGL2,HDAC1,HELZ2,HHEX,IFIT2,IFIT3,IL12A,IL12B,IL15,IL15RA,IL18,IL6,IRF1,IRF7,ISG15,ISG20,LMO4,LTA,MERTK,NFKBIZ,NMI,OASL,PLA1A,PLAT,RBL1,RILPL1,RSAD2,SH3BP5,SLCO3A1,SLFN12L,SOCS1,STAT1,STAT2,TCF4,TIMELESS,TLR3,TNF,TNFSF8	819 (9)
RIPK2	1.102	kinase	Activated	2.463	2.90658	0.00124	ABCA1,ACSL1,CD36,CD40,CD69,CD86,CXCL10,CXCL2,CXCL3,HAMP,ICAM1,IFNG,IL17A,IL1B,IL6,LMO4,MARCKSL1,MCOLN2,MTTP,NFKB2,PDE4B,PNPLA2,PPARA,PPARD,PTGES,RASGRP1,RASGRP3,SCD,SLC27A1,TNF,TRAF1,TSLP,VCAM1	1189 (15)
NLRC5	-1.207	transcription regulator	Activated	2.46	2.45842	0.00348	B2M,CD40,HLA-A,HLA-C,HLA-E,HLA-F,HLA-G,IL10,IL1B,IL6,TAP1,TIMP1,TNF	1033 (15)
isoproterenol		chemical drug	Activated	2.458	5.91009	1.23e-06	ACE,ACTA2,ADCY6,ADRB1,ADRB2,ALDH3B1,APLN,APP,ATF3,ATP7B,AURKA,BCL2,BCL2L11,CASP1,CAV1,CCL3L3,CD68,CDK1,COL1A1,CREM,CSF3,CYP1A1,CYP1B1,DHRS3,EDN1,FGF2,FOS,FOSL1,FOSL2,GATA4,GPR3,GRK2,GRK5,HILPDA,HSD17B7,IL10,IL18,IL1B,IL6,INA,JUN,JUNB,LGALS12,LGALS3,LIF,MERTK,MITF,MYH7,MYL4,NAMPT,NFATC4,NKX2-5,NLRP3,NOS1,PDGFA,PDGFB,PLAT,PNPLA2,PRKD3,PRNP,RAB27A,RGS5,RLN3,SCD,TBC1D10A,TGFBR3,TIMP1,TLR4,TNF,TNFSF11…	1809 (18)
CLEC7A	46.492	transmembrane receptor	Activated	2.453	5.35853	4.38e-06	CCL2,CCL22,CCL3L3,CCL4,CCR7,CSF3,CXCL2,CXCL8,IL10,IL12A,IL12B,IL13,IL17A,IL1B,IL23A,IL6,SOCS1,TLR4,TNF,TNFSF4	1499 (16)
blinatumomab		biologic drug	Activated	2.449	2.73993	0.00182	CCL2,CCL4,CXCL8,IFNG,IL10,IL6
poly-L-lysine		chemical reagent	Activated	2.449	1.00087	0.0998	CCL2,CXCL8,IL10,IL1RN,IL6,ITGAM
PIN1	-1.098	enzyme	Activated	2.446	3.00877	0.00098	ATF6,BCL2A1,CCND1,CCNE2,CD274,CDH2,CDK10,CDK5R1,CDKN1A,CENPA,CXCL8,DDIT3,DEPDC1,DNAJB9,EPB41L4B,FBXW7,FN1,HES1,HSPA5,IL1B,IL6,MCL1,MDM2,MIS18A,NCAPH,NFE2L1,NOTCH3,PDCD1,PPARD,SLC29A1,TBC1D31,TIMP1,TNF,TP53I3,XBP1	1988 (20)
pomegranate extract pill		chemical drug	Activated	2.446	1.35754	0.0439	GCLC,NQO1,PRDX1,SOD1,TFB2M,TUFM
CREB1	-1.254	transcription regulator	Activated	2.442	18.9706	1.07e-19	ABCA1,ACHE,ADM,ADORA2A,AK4,AKAP1,AKAP13,AKT3,APOE,APOLD1,ARHGAP33,ARL15,ATF3,ATF5,ATP2B4,AURKA,BAG3,BCAP29,BCL2,BCL2L1,BDNF,BHLHE22,BIRC5,BNIP3,BRINP2,BTG2,CADPS2,CAMK1D,CAMKK2,CAPN5,CCDC85A,CCL3,CCL4,CCNA2,CCNB1,CCNB2,CCND1,CD4,CD68,CD9,CDA,CDCA8,CDH2,CDK14,CDK19,CDKN1A,CEBPA,CEBPB,CEBPD,CGREF1,CH25H,CHGA,CHGB,CHRNA1,CIART,CIITA,CLMP,CNN1,COCH,COL24A1,CPEB1,CR2,CREB1,CREM,CRIM1,CRYM,CSRNP1,CTNNA…	2110 (21)
INSR	1.073	kinase	Activated	2.44	5.50169	3.15e-06	ACADVL,ACOT2,ACSL1,ALPP,ARHGDIA,ARL4A,ARRDC3,ATF3,ATP1B1,BCL2A1,BIRC5,BMP4,CASP6,CBR1,CCL2,CCL4,CCND1,CCND2,CCNG2,CD36,CD83,CDC5L,CDK1,CDKN1A,CDKN2C,CEBPA,CEBPZ,CERS6,CFL1,CITED2,CKMT1A/CKMT1B,CORO1A,CORO2B,CPT1B,CSTB,CTSB,CXCR4,CYP1B1,CYP51A1,DAG1,DCTN4,DDR2,DHCR7,DLX1,DUSP1,EDN1,EGR1,EGR2,EOMES,EREG,FBP1,FCGBP,FGF8,FOS,FOXP3,FURIN,GADD45A,GAPDH,GATA4,GCH1,GCK,GMCL1,GRB7,GRN,HAND1,HBEGF,HESX1,HH…	2229 (23)
MPT0B291		chemical reagent	Activated	2.438	0.721246	0.19	CHEK1,CHEK2,DDB2,FANCI,H2AX,NEIL3,POLQ,RBBP8,XRCC2
promegestone		chemical drug	Activated	2.437	4.82681	1.49e-05	AMOT,BCL2L1,BCL6,BIRC3,BTG2,CCND1,CCNE1,CDKN1A,CEBPA,CEBPB,CTSD,CYP19A1,DUSP5,E2F1,EGFR,ERBB2,ERBB3,HBEGF,HSD11B2,IER3,IFIT3,IFIT5,IL1R1,LAMC2,let-7,LGALS3BP,mir-25,mir-26,mir-27,MT1X,MT2A,MUC1,NAGA,NCOA1,NET1,NFKBIA,PIM2,RARG,RGS2,SGK1,STAT1,STAT3,VIPR1	2350 (22)
IL25	5.348	cytokine	Activated	2.436	4.34872	4.48e-05	BTG2,CCL2,CCL3,CIDEB,CIDEC,CSF2,CSF3,CXCL8,F11R,FGF2,FLT1,GATA3,GFI1,IFNG,IL10,IL12A,IL12B,IL13,IL17A,IL17RB,IL1B,IL1R2,IL23A,IL2RA,IL4,IL6,JAG1,NMUR1,TNF,TNFRSF8,TSLP,ZFP36L1	1103 (15)
CCL5	-1.216	cytokine	Activated	2.434	10.5452	2.85e-11	ADGRE5,AHR,AIF1,ALCAM,BDNF,C5AR1,CAPN2,CCL2,CCL3,CCL3L3,CCL4,CCR1,CCR3,CCR5,CCRL2,CD40,CD44,CXCL2,CXCL3,CXCL8,CYP1B1,DUSP1,F2R,FOS,GFI1,HMGA1,IER2,IFNG,IL1B,IL6,ITGAM,LIMS1,MMP19,NAMPT,OLR1,PLAUR,PNP,SERPINB2,SGK1,SOD1,SQLE,STAT1,STAT3,THBS1,TLR4,TNF,TPMT,TUBB4B,ZFP36	1452 (15)
SMARCD1	1.009	transcription regulator	Activated	2.433	2.24872	0.00564	BTG2,CDKN1A,FOXP3,KLK2,KLK3,TMPRSS2	2035 (12)
Integrin		complex	Activated	2.433	0.555955	0.278	AHR,CCND1,FOS,JUN,SOCS3,VEGFA
bucladesine		chemical toxicant	Activated	2.432	15.684	2.07e-16	ABCA1,ABCA3,ACER2,ADGRL2,ADM,AIP,ANXA1,APOE,AR,ASS1,ATP7B,AXIN2,BAMBI,BCL2,BDNF,C5AR1,CAMK1G,CCL22,CCND1,CCR5,CD38,CD44,CD80,CD86,CDH2,CDK5R1,CDKN1A,CEBPB,CHGA,CHST2,CITED4,CLCF1,CLU,CR2,CREB1,CREM,CXCL10,CXCL3,CXCL8,CXCR4,CYP17A1,CYP19A1,DGKQ,DMD,DUSP1,EGLN3,EGR1,EGR2,EOMES,EPHA4,ERBB2,ERRFI1,ETV4,FCGR2A,FGFR1,FN1,FOS,FOSL1,FOSL2,FOXO1,FRRS1,FSTL3,GADD45B,GALNT16,GAP43,GCH1,GCK,GDF15,GEM,GLS2,GL…	1848 (18)
RBL1	-1.512	transcription regulator	Activated	2.432	4.87943	1.32e-05	AURKB,BCL2L11,CASP4,CASP6,CCNA2,CCND1,CCNE1,CDK1,CDKN1A,CRADD,DHFR,DUSP10,E2F1,FGF2,FOS,H2AC8,HES1,IVL,MCM10,MCM2,MCM3,MCM5,MCM6,MCM7,NEK2,NOTCH1,ORC1,PA2G4,PLK1,POMC,RB1,RBL1,RRM2,SFRP1,TERT,THBS1,TNF,TP73	1581 (16)
ERK		group	Activated	2.426	12.8069	1.56e-13	ABCA1,ACP5,ACTA2,ACTN1,APOBEC3G,AXL,BCL2,BCL2L1,BCL2L11,BMF,BTG2,BTG3,CAV1,CCL2,CCL4,CCND1,CCNE1,CCR1,CD1D,CDK5R1,CDKN1A,CEBPD,CKS2,CLU,COL1A1,CSF2,CTTN,CXCL10,CXCL2,CXCL8,CYP1A1,DPYSL2,DUSP1,EDN1,EGFR,EGR1,EGR2,EIF2AK2,EPHA2,EREG,ESRRA,ETS1,FGF2,FN1,FOS,FOSL1,FOSL2,FOXO1,FOXP3,GCLC,GDF15,GPRC5C,HBEGF,HEY1,HMGA1,HOMER1,HOXA1,ICAM1,ICAM3,IER3,IFNG,IL10,IL12A,IL12B,IL17A,IL1B,IL23A,IL23R,IL6,IRS1,I…	1738 (13)
CLEC12A	46.146	other	Activated	2.425	3.47496	0.000335	IFIT2,IFIT3,IRF7,ISG15,RSAD2,USP18	1420 (16)
WAS	-1.202	other	Activated	2.425	1.73518	0.0184	CD69,CSF2,GLG1,IFNG,IL17A,IL1B,IL23R,IL4,ITGAE,SELPLG,STAT1,TBX21,TNF,TNFAIP2
YTHDF1	1.041	other	Activated	2.425	1.59176	0.0256	ACTA2,DDB2,FN1,NLRP1,SMAD3,TCF7L2
2-chloro-N(6)cyclopentyladenosine		chemical reagent	Activated	2.425	1.35754	0.0439	BCL2,BCL2L1,MPO,SPHK1,TNF,VEGFA
mimosine		chemical drug	Activated	2.425	1.16368	0.0686	CDKN1A,CIITA,HLA-DQA1,HLA-DQB1,SHMT1,VEGFA
doxifluridine		chemical drug	Activated	2.423	2.99568	0.00101	AQP3,CCNG1,CDKN1A,FDXR,GADD45A,MDM2,RPS27L,RRM2B,SESN1,SNRPG,TP53I3
ozone		chemical toxicant	Activated	2.419	2.09637	0.00801	CCL3L3,CCR3,CXCL10,CXCL2,CXCL3,CXCL8,FOS,IFNG,IL10,IL17A,IL1B,IL6,JUN,JUNB,MPO,SOCS3,TNF	1060 (13)
TRPA1	2.991	transporter	Activated	2.415	2.24872	0.00564	CXCL3,FOS,IL1B,IL4,IL6,TRPA1	1756 (21)
MED12	1.189	transcription regulator	Activated	2.415	1.65758	0.022	BMP4,CREB5,EGR2,EREG,FOXP3,GDF15,GLI1,LIF,NEUROG2,POLE4,TJP1
MXI1	5.662	transcription regulator	Activated	2.414	1.12494	0.075	CCNB1,FOXM1,ID1,ID2,IFT20,IMPDH2,MKI67,SLC1A4
collagen type i (family)		group	Activated	2.414	0.512862	0.307	CCL2,CDH2,FRMD6,HTR2B,IL1RN,MMP19,RIT1,SERPINE1,SNAI1
intralipid		chemical drug	Activated	2.412	1.13668	0.073	ANGPTL4,CXCL3,DDIT3,ERN1,FOS,HILPDA,XBP1
CD86	6.829	transmembrane receptor	Activated	2.411	4.4318	3.7e-05	BCL2L1,CCL3,CCL4,CD27,CD28,CD40,CD69,CD80,CD86,CSF2,EGR2,FCER2,HOMER2,ICAM1,ICOS,ICOSLG/LOC102723996,IDO1,IFNG,IL10,IL2RB,IL4,IL6,NFKBIA,POU2F2,TNF,TNFAIP3,TNFRSF9,XBP1	1556 (18)
IFNL4	-1.991	cytokine	Activated	2.411	3.69037	0.000204	CXCL10,IFI6,IFIH1,IFIT1,ISG15,MX1,OAS1,OAS2,OASL,STAT1	768 (9)
PPRC1	-1.133	transcription regulator	Activated	2.411	1.70997	0.0195	ALOX5AP,BMP6,CCL20,CXCL8,DUSP5,EPHB1,ERRFI1,FBXL13,GDF15,IL1A,LAMB3,NAMPT,NFKBIZ,OSCAR,RND3,ST6GALNAC3,TM6SF1,TMEM154,ZFP36L1
HRAS	-1.047	enzyme	Activated	2.407	30.3655	4.31e-31	A2M,ACTG1,ADARB1,ADGRE5,ADM,AKT1,AMOTL2,ANXA2,ANXA8/ANXA8L1,APP,ARHGAP26,ASAP1,ATP1A3,AURKA,AURKB,B2M,B4GALT3,BCL2,BCL2L1,BCL2L11,BIRC3,BIRC5,BMP1,BMP4,BNIP3,BTG2,C1QTNF12,CACNG8,CALCRL,CALU,CAPG,CAPN2,CAV1,CBX2,CCDC80,CCL20,CCL3,CCNA2,CCNB1,CCND1,CCND2,CCNE1,CCNG1,CD24,CD44,CD69,CD81,CD96,CDC42BPA,CDK1,CDKN1A,CDKN2B,CDKN2D,CDON,CEBPB,CEBPD,CGREF1,CHGA,CHST11,CHST12,CISH,CLCF1,CLU,CNN1,COL18A1,CO…	2215 (23)
PTGDR2	1.23	G-protein coupled receptor	Activated	2.407	0.744727	0.18	CARHSP1,CCL22,IL13,IL4,ITGAM,TNF
CXCL12	10.931	cytokine	Activated	2.403	9.84466	1.43e-10	ACP5,ACTA2,AIF1,AXL,BCL2,BCL2L1,BCL3,BMP1,BMP6,CA2,CCL1,CCL2,CCND1,CD33,CD36,CD4,CD44,CD69,CD82,CD9,CDKN1C,COL1A1,CX3CL1,CXCL10,CXCL12,CXCL8,CXCR4,CYP2C18,DAD1,DLL4,DOCK9,DPP4,EGFR,EGR1,ERBB2,F2R,FN1,FOS,FYN,GAD1,GAS2,HES1,HEY1,HNRNPD,ICAM1,ID1,IFI27,IFNG,IGFBP7,IL1A,IL1B,IL24,IL2RA,IL6,IRF6,ITGAX,ITGB1,ITGB3,JUN,JUNB,LCP2,let-7,LOXL2,MAPK12,MAPK8IP2,MAPRE3,MARCKS,mir-24,MMP7,MSH6,NR2F6,PLAU,PPEF…	1590 (12)
MSC	1.367	transcription regulator	Activated	2.402	11.7986	1.59e-12	AICDA,CCL1,CCL2,CCL4,CHL1,CHST4,CSGALNACT2,DDX60,EPSTI1,FCRL2,FCRL4,FCRL5,FLI1,FUT7,GPAT3,HAVCR2,HGF,IFI27,IFI44,IFI44L,IFIT1,IL17RB,IL32,IRF7,JCHAIN,LGALS12,MAP7D2,MYBPC2,PCED1B,PIEZO2,POU2F2,PSD3,SCEL,SDSL,SELL,SLC51B,STS,SYNE2,TLR7,TRIB1,XAF1,XCL1,ZAP70,ZNF423	1330 (9)
IL16	1.071	cytokine	Activated	2.401	2.59517	0.00254	BCL2L1,CCL3L3,CD4,CMA1,FOS,FOXP3,IFNG,IL1A,IL2RA,IL6	1295 (21)
MTORC2		complex	Activated	2.401	1.16368	0.0686	CCL2,FOXP3,IFIT2,IFNG,IL4,ISG15
EIF6	-1.038	translation regulator	Activated	2.401	0.709965	0.195	ABHD15,ABHD2,ACADVL,ACOT2,ACSM3,ANXA2,CD36,CERS6,COL1A1,CORO1C,ETFBKMT,FADS3,GALNT10,HSD17B7,IRS1,LAMB3,LSS,MRPL14,MRPL36,MVD,NUDT14,NUDT7,PIK3C2A,PIK3CG,PPARA,PPARG,ROBO1,SCD,SERAC1,SMPD3,SOD1,SORBS1,TNFAIP3,VCL
PHF1	1.594	transcription regulator	Activated	2.4	1.24489	0.0569	BBC3,CCNG1,CDKN1A,HOXA10,HOXA6,HOXA9,HOXB4,HOXB9,MDM2,MYT1,TP53I3
Klra7 (includes others)		transmembrane receptor	Activated	2.399	2.21396	0.00611	CASP4,CCL3L3,CCL4,CSF2,GPR65,IFNG,SERPINE2,TBX21,TNF,TYROBP,XCL1	1444 (14)
KAT2B	1.169	transcription regulator	Activated	2.399	1.27409	0.0532	ABCB1,B2M,CCL2,CD80,CDKN1A,CSF3,CYP19A1,E2F1,EDEM1,FOXP3,GLI1,HSPA5,ISG15,ITGAM,IVL,KLF2,KLK3,PRLR,RB1,SFTPA1,TNF
TNFRSF8	-1.937	transmembrane receptor	Activated	2.398	7.12148	7.56e-08	AHNAK,CASP1,CCL1,CCL22,CCL3,CCL4,CCR7,CDC5L,CDKN1A,CES2,CXCL8,CXCR4,GBP1,GBP2,GCLC,GZMB,IFI16,IFNG,IL10,IL13,IL4,JUNB,LCP2,MAP4K3,MRTO4,NFKB2,NKG7,PBX3,PIM2,TMEM41B,TNF,TNFRSF25,TNFRSF8,TNFSF10,TRAF1,VCL	1655 (16)
ALOX12	-1.016	enzyme	Activated	2.398	3.22113	0.000601	CXCL3,FN1,FOSL1,IFNG,IL12B,JUN,NOS3,PDGFRA,VEGFA	1320 (16)
Collagen type I (complex)		complex	Activated	2.398	2.15428	0.00701	ACTA2,APOE,APP,BIK,CCND1,CD83,CDH2,COL1A1,CPB2,CSF2,EIF4EBP1,F13A1,FN1,HDGF,IL6,ITGA1,ITGA2,ITGA3,ITGB1,MCL1,NOS3,PLAU,PLOD2,PRRX1,RUNX2,S100A10,TNF,VIM	1832 (18)
TEAD1	-9.5	transcription regulator	Activated	2.398	0.326058	0.472	ACADVL,ACSL1,ACTA2,ADM,AMOTL2,ARID5B,CCND1,CDK6,CDKN1A,CPT1B,ECH1,EDN1,EDNRA,FILIP1L,FJX1,HADH,IGFBP5,KAZN,LATS2,LIMCH1,MB,MTMR10,MYH6,MYH7,NDUFB10,NDUFS6,NFKBIZ,NRXN2,NUAK1,PCDH18,PDGFRL,PPARA,PPARD,PTPRO,PURB,RB1,SAMD5,SLFN5,SULF1,THBS1,TLE1,TNNC1,TP63
EML4-ALK		fusion gene/product	Activated	2.397	6.88941	1.29e-07	BCL2,BCL2L11,BIRC5,CD24,CD274,CD44,CDC14B,CDKN1A,CDKN2C,CXCL8,DUSP1,EGFR,EGR1,ERBB3,GADD45B,HIPK2,IL15RA,IL24,IL4,IL4R,IL6R,IRAK1,IRF1,ITGB1,ITGB5,JUNB,MAP3K13,MDM2,MITF,PDGFC,PIK3R1,PPARG,PTP4A1,RAB27A,RHOB,SERPINE1,SLC2A3,SOCS3,SP100,STAT3,TGFB3,THBD,TLR2,TNFAIP3,TNFRSF10B,VCAN	1776 (16)
cholesterol		chemical - endogenous mammalian	Activated	2.395	11.098	7.98e-12	ABCA1,ABCA2,ABCA6,ABCA7,ABCB11,ABCG1,ACAT1,ACSL1,ACSS2,ACTA2,ADAM11,APOE,APP,AQP9,ATF3,C15orf48,CAMK1D,CASP1,CAV1,CCL1,CCL2,CCL4,CCR2,CCR5,CD1C,CD5L,CD68,CETP,CNN1,COL1A1,CR1,CROT,CSF1,CXCL10,CXCL2,CXCL3,CXCL8,CYP27A1,CYP7B1,DCSTAMP,DDIT3,DHCR7,FABP6,FADS1,FCGR2B,FGF2,FLT1,FN1,GLI1,GLI3,GNAI1,GNMT,GRIN1,HBEGF,HES6,HLA-DRB5,HNRNPD,HSP90B1,HSPA5,ICAM1,IL10,IL10RA,IL10RB,IL12B,IL1A,IL1B,IL1RN,IL6,IN…	2003 (18)
Collagen Alpha1		group	Activated	2.395	1.30103	0.05	CDH2,CDKN1A,COL1A1,EGFR,IL1RN,PLAU,PLAUR
SOX4	1.005	transcription regulator	Activated	2.39	11.1175	7.63e-12	ADAMTS4,ADGRE5,ALDH1B1,AMOTL1,APBB1,ARNT,B3GNT8,BBC3,BCL2,BIRC5,BLK,BMPR2,CACNA1H,CAPN2,CASP1,CD1D,CDH2,CEMIP2,CGAS,CHAC1,CLIC6,CSNK1E,CXCL12,DBNDD2,DDAH2,EFNA5,EIF4E3,EMB,ENPEP,EOMES,EPG5,EVI2A,EVL,FN1,FOS,GCAT,GFI1,GLDC,GNRH1,GPR171,GPR183,GRB7,HAMP,HIPK2,HLA-DQB1,IGF1,IGFBP4,KANK1,KDM7A,KYNU,LCK,LRRN3,MAGED1,MAGI1,MAP7,MARCKSL1,MEX3A,MGST2,NAV1,NRXN2,NUAK1,PARD6G,PECAM1,PLEKHA1,PLXNA3,PLXND1,P…	2001 (17)
NfkB-RelA		complex	Activated	2.386	4.18776	6.49e-05	BCL2,BCL2L1,CCL2,CCL3,CSF2,CXCL10,CXCL3,CXCL8,CXCL9,ICAM1,IL10,IL1B,IL23A,IL6,IRF1,NFKBIA,NR3C1,SOCS3,TNF,VCAM1
EHMT1	1.107	transcription regulator	Activated	2.38	7.06753	8.56e-08	A4GALT,ACSL1,ADGRL1,ARX,BCL9L,BCR,BEST2,C3,CD38,CDKN1A,CDKN1C,CDKN2C,CEBPD,CORO2A,CYB5A,DDX4,EFNA1,EYA4,FAIM,FRAT1,GARIN5A,GNRH2,GRAMD4,HES2,HSD11B2,IL17RC,IL6,ITGA3,LOC102724788/PRODH,MAN1C1,MGST1,MSRB1,MUC1,NIBAN2,NUB1,PCSK6,PKP2,PLPP1,POU5F1,PPL,RAB11FIP3,RGCC,RRAD,SAT1,SDSL,SHMT1,SLC7A7,SMPDL3B,ST3GAL1,STAC2,STRA6,TDRKH,THRA,TLE2,TNF,UNC13B,VSTM2L	1434 (7)
CCR2	65.323	G-protein coupled receptor	Activated	2.38	5.53018	2.95e-06	AEBP1,APP,CCL2,CCL22,CCL3L3,CCL4,CCR1,CCR2,CCR5,CD40,CD86,COL1A1,COL6A1,COL6A2,CSF1,CSF2,CSF3,CX3CL1,CXCL10,CXCL12,CXCL13,CXCL2,CXCL3,CXCR4,F13A1,FN1,GPT,HSPG2,HTR2B,IFNG,IGF1,IL10,IL12B,IL13,IL17A,IL18,IL1A,IL1B,IL23A,IL4,IL6,ITIH3,LAMB2,P4HA1,PLOD1,PMCH,TGM2,THBS1,TIMP1,TNF,TSLP,TXLNA,VCAN	2078 (18)
SAA		group	Activated	2.379	2.07727	0.00837	BCL2L11,CCL2,CSF1,CSF3,CXCL8,ICAM1,IL10,IL12B,IL17A,IL1B,IL1RN,IL23A,IL6,NLRP3,TFPI,TLR2,TNF,VCAM1	997 (13)
ISGF3		complex	Activated	2.378	3.3279	0.00047	EIF2AK2,IFIH1,IFIT2,IL6,IRF1,IRF5,IRF7,ISG15,MX1,RSAD2,TNFSF10
CUX1	-1.055	transcription regulator	Activated	2.375	1.43415	0.0368	ARHGAP32,ARHGDIB,CCNA2,CCNE2,CDH2,CDKN1A,CXCL10,CXCL2,CXCL3,CXCL8,ECT2,EGFR,ERBB2,H1-5,MARCKS,MYH7,PTK2,RAB36,RACGAP1,RHOBTB3,SNAI1,THBS1,VIM,WNT10A,WNT5A,WNT6
colchicine		chemical drug	Activated	2.375	0.970616	0.107	ABCB11,ACTA2,ATF3,BDNF,CD40,FOS,GAP43,IL18,IL1B,JUN,KCNQ4,MCL1,MDM2,MX1,NQO1,PTHLH,SMAD3,SOX9,TNFRSF1A,TUBA1B
PDGFB	9.061	growth factor	Activated	2.373	3.97881	0.000105	ACTA2,ADAMTS7,AKT1,BBC3,CCL3,CCND1,CNN1,COL1A1,CXCL8,EGR1,EPO,FN1,FOS,FOXO1,FOXO4,HMGA1,ICAM1,IL1RN,IL6,KCNA5,KLF2,mir-29,NOTCH2,NOTCH3,PDGFRB,RGS5,S1PR2,SERPINF1,SMAD1,STAT3,THBS1,TIMP1,VEGFA	1847 (19)
lipoteichoic acid		chemical - endogenous non-mammalian	Activated	2.371	4.53018	2.95e-05	ANTXR2,BCL2,BCL2L1,BCL2L11,CCL2,CCR1,CCR5,CD80,CD83,CD86,CSF3,CXCL10,CXCL8,CXCR4,DEFB4A/DEFB4B,EBI3,ICAM1,IL10,IL12B,IL17A,IL1B,IL1RN,IL23A,IL6,NLRP3,PDCD1,PTAFR,TLR2,TLR3,TLR4,TLR7,TNF,TNFRSF11B,TNFSF11,TREM1	1201 (14)
cholecalciferol		chemical - endogenous mammalian	Activated	2.36	11.6655	2.16e-12	ABCB11,ADGRG1,ALOX5,ANKRD22,ANXA2,BCL2,BCL2L1,BDNF,BIRC5,CCL2,CD38,CD40,CD80,CD83,CD86,CDA,CEBPA,CEBPB,CEBPD,COL1A1,CSF1,CXCL10,CYP27A1,CYP27B1,E2F1,EDN1,EGFR,F13A1,FABP6,FOS,FOXP3,GAS7,IGF1,IL10,IL12B,IL6,ITGAM,ITGAX,JUN,LRRC25,LY75,MCEMP1,ME1,MS4A6A,MYH6,MYH7,MYO6,NDUFAF4,PDGFRA,PDGFRB,PIP5K1B,PLD4,PPARG,PRKCB,PRKX,PSAT1,PTHLH,RB1,RGS1,RUNX2,SERPINB8,SERPINE1,SLC20A1,SLC26A11,SLC2A14,SULF2,TNF,…	2021 (21)
IL11RA	1.743	transmembrane receptor	Activated	2.359	2.52724	0.00297	ACTA2,CCL20,CCL3L3,CCL4,CCNE1,CXCL2,CXCL3,DUSP5,FOS,FOXP3,HGF,ICAM1,ICAM4,IL4R,IL6,JUNB,MMP7,SOCS3,SOX2,STAT3,TIMP1,TNF,VEGFA	1963 (17)
Immunoglobulin		complex	Activated	2.355	45.1221	7.55e-46	ABCA7,ACKR2,ACO1,ACSL1,ACSS2,ACTA2,ADAM19,ADAM23,ADAMTS12,ADM,ADRA1B,ADRB2,AGPAT2,AHR,AICDA,AIF1,AKT1,ANGPT2,APLN,APOE,APOL2,APP,AQP9,ARRDC2,ATP4B,AXL,B2M,BCL2,BCL2A1,BCL2L1,BCL2L11,BCL3,BCL6,BDNF,BIN1,BIRC3,BIRC5,BLVRB,BMP4,BPGM,BRCA1,C17orf99,C3,C5AR1,CALR,CAMK2D,CAPG,CAPN8,CASP1,CASP4,CBS/LOC102724560,CCL1,CCL19,CCL2,CCL20,CCL22,CCL3,CCL3L3,CCL4,CCNA2,CCND1,CCND2,CCNE1,CCR2,CCR7,CD1D,CD274,CD2…	1829 (13)
CREB3L2	2.255	transcription regulator	Activated	2.353	3.69037	0.000204	ARF4,ATF5,COPB1,HSPA5,MCL1,MX1,SEC23A,SEC23B,SEC24C,USO1
D-galactosamine		chemical - endogenous mammalian	Activated	2.346	5.69037	2.04e-06	BCL2,CASP1,CTSB,CXCL10,CXCL2,EDNRA,FOS,GDF15,GPT,ICAM1,IFNG,IL10,IL12A,IL12B,IL18,IL6,JUN,JUNB,MAPK9,MCL1,NLRP3,TIMP1,TLR4,TNF,TNFRSF1A,TNFSF10,TRADD	1304 (14)
Map3k7		kinase	Activated	2.346	5.40121	3.97e-06	AR,BCL2L1,BMP4,CCL3L3,CCL4,CSF2,CXCL10,CXCL2,CXCL3,EDN1,EGR2,FGL2,HBEGF,IFIT2,IFNG,IL10,IL15,IL15RA,IL1B,IL6,ISG15,ISG20,JUN,LORICRIN,NFKBIA,NFKBIZ,RILPL1,RSAD2,S100A9,SCD,SESN1,SNAI1,SOX9,SPHK1,TLR3,TNF,VCAM1,WNT11	1550 (12)
cyclophosphamide		chemical drug	Activated	2.345	4.9914	1.02e-05	ABCB11,ATF3,B2M,BCL2,C4A/C4B,CD44,CD69,CLU,CXCL2,CXCL3,CXCR2,DTX1,ELF3,FCGR2A,FOS,FOXP3,GAP43,GCGR,HLA-E,ICAM1,IER3,IFNG,IL10,IL12B,IL18,IL18R1,IL1B,IL1R2,IL4,IL6,IL7R,LAMC2,LGALS3,PECAM1,PLA1A,PTGES,PTGES2,RBM3,S100A11,SATB1,SOX9,THBS1,TIMP1,TNF,TNFRSF12A,UPP1,VEGFA	1417 (14)
IFNA8	3.529	cytokine	Activated	2.343	3.71444	0.000193	CXCL10,CXCL9,HAMP,IFIH1,IFIT1,IFNG,ISG15,MX1,PLAAT4,STAT4,ZBP1	971 (14)
NREP	-1.008	other	Activated	2.343	1.96658	0.0108	ACTA2,FGF2,ITGA3,ITGA5,PDGFA,PDGFB,PDGFRA,PDGFRB,VEGFA
PI3K (complex)		complex	Activated	2.342	13.3316	4.66e-14	ABCA1,ABCC4,ADAM28,ADRB2,AKT1,ALOX5AP,APLN,ATF3,BBC3,BCL2,BCL2A1,BCL2L1,BCL2L11,BIRC3,BIRC5,CCL2,CCL3,CCL4,CCNB1,CCND1,CCND2,CCNE1,CCNG2,CCR1,CCT6A,CD274,CD44,CD55,CD86,CDH2,CDK5R1,CDKN1A,CDKN2B,CEBPB,CHGA,CNR2,COL1A1,CREB1,CTCF,CTSD,CXCL10,CXCL8,CXCR4,DDIT3,DLL4,DUSP1,E2F1,ETS1,FBLN5,FBXO32,FLI1,FN1,FOS,FOSL1,FOXO1,FUT7,GAP43,GATA3,GCLC,GCLM,GLI1,HBEGF,ICAM1,IFIT1,IFNG,IGF1,IGFBP2,IL10,IL12B,IL1…	1676 (15)
SAA1	1.744	transporter	Activated	2.341	2.19518	0.00638	BCL2,CCL3,CCL3L3,CCL4,CCND1,CEBPA,CSF3,CXCL10,CXCL8,IL10,IL12B,IL17A,IL1B,IL1RN,IL6,PPARG,S100A9,TNF,TNFSF11	1229 (12)
MAOA	-1.023	enzyme	Activated	2.341	1.72125	0.019	ABCG2,ACTA2,AMOTL2,BCL2,CCL2,CCND1,CD44,CEBPD,IL10,IL1A,IL1B,IL6,MCL1,SOCS3,VIM
semaxinib		chemical drug	Activated	2.34	10.8416	1.44e-11	ACKR3,ACP5,AHR,AIF1,ARHGEF10,ATF3,CCL19,CCL20,CCL22,CCL3L3,CCNE1,CCR1,CCR5,CCR7,CCR9,CD24,CD247,CD28,CD4,CHI3L1,CMKLR1,CSF2RB,CX3CR1,CXCL10,CXCL13,CXCL2,CXCL3,CYP19A1,CYP1B1,EDN1,EGR1,EGR2,EREG,FOS,FOXO1,GDF11,GDF15,GRAP2,GREM1,HAVCR2,HES1,ICOS,IL15,IL18RAP,IL1B,IL1R1,IL1R2,IL2RB,IL6,IL7R,ITK,LCK,LRG1,MCM6,MYOF,NFKBIA,NLRP3,NOS3,OAS3,PECAM1,PRKN,RASGRP1,SEMA6B,SERPINE1,SLAMF6,SLAMF8,SOCS3,TCHP,TH…	2186 (21)
TP63	-2.94	transcription regulator	Activated	2.334	20.0799	8.32e-21	A2M,ABCB1,ABCC5,ACTA2,ACTL6A,ADA,ADA2,ADM,AEN,AHR,AKT1,AKT1S1,ANOS1,ATF2,ATG10,AXL,B9D1,BBC3,BCL2L1,BCL2L11,BCL3,BCL6,BLM,BMP3,BMP4,BRAF,BRCA1,BST2,CA4,CAPN12,CAPN2,CASP1,CAV1,CCL22,CCNA2,CCNB1,CCND1,CCND2,CCNE1,CCNG1,CCR1,CD82,CDC25C,CDH2,CDK1,CDK17,CDK6,CDKN1A,CDKN1C,CDKN2B,CEACAM1,CEBPA,CHD3,CITED2,CKS2,COL4A3,CSTA,CTSD,CTXN1,CXCL8,CXCR4,DDB2,DLX1,DNMT1,DOK1,DST,DUSP10,E2F1,EDN2,EGFR,EGR1,EGR2…	2095 (18)
9,10-dimethyl-1,2-benzanthracene		chemical toxicant	Activated	2.329	4.97881	1.05e-05	AHR,BCL2L1,BIRC5,CCDC80,CCND1,CDKN1A,CXCL2,CXCL3,CYP19A1,CYP1A1,CYP1B1,EGFR,EPHA2,GADD45A,GCLC,HBEGF,HGF,IL10,IL12A,IL1B,IL6,JUN,LORICRIN,MAPK9,mir-132,NQO1,REL,RUNX1,S100A9,SERPINE1,TNF	1687 (16)
C5AR1	-2.028	G-protein coupled receptor	Activated	2.328	4.46597	3.42e-05	ATF6,C3,C5AR1,CD28,CD36,CD40,CD55,CD80,CD86,COL1A1,CSF3,CXCL2,CXCL3,CXCL8,ERN1,FCGR2A,FCGR2B,HSPA5,IFNG,IGF1,IL10,IL12B,IL13,IL17A,IL1B,IL23A,IL27,IL4,IL6,LTBP2,PPARG,SERPINE1,TNF	1056 (14)
IL23		complex	Activated	2.325	6.52724	2.97e-07	ACKR2,AHR,BCL2,CCL20,CCR2,CSF2,CXCL8,HSPA5,ICOS,IFNG,IL10,IL12A,IL12B,IL17A,IL17RC,IL1B,IL23R,IL2RA,IL4,IL6,RASA3,RORA,STAT3,TBX21,TLR2,TLR3,TLR4,TNF,TNFSF11,TSLP	1113 (16)
lipoarabinomannan		chemical - endogenous non-mammalian	Activated	2.324	4.74232	1.81e-05	CCL3,CCL4,CCR5,CXCL2,CXCL8,CXCR4,ERBB3,HLA-DRB5,ICAM1,IER3,IL1B,IRF1,ITGA7,STAT1,TLR4,TNF	2047 (19)
xanthine derivative CB002 analog 4		chemical reagent	Activated	2.324	2.50446	0.00313	ASAH1,BBC3,CHCHD6,CKS1B,ERCC6L,GADD45A,JAG1,PHLDA3,RBP1,SERPINE1,SLFN5,SPATA18,SSR1,TNFRSF10B,TSPAN6	1452 (7)
IFNA16	1.904	cytokine	Activated	2.318	3.71444	0.000193	CXCL10,CXCL9,HAMP,IFIH1,IFIT1,IFNG,ISG15,MX1,PLAAT4,STAT4,ZBP1	859 (11)
MAK683		chemical drug	Activated	2.318	3.14813	0.000711	BMP6,CCL2,CCL25,CXCL12,EGFR,FOXO1,GATA3,GATA4,GBP1,IGFBP5,IL1B,IL27,IL6,ITGA2,MKI67,TBX3,WNT6
CDKN1A	3.423	kinase	Activated	2.317	18.4237	3.77e-19	ACTA2,ANLN,APP,ASPM,ATAD2,AURKA,AURKB,BBC3,BCL2,BCL2L1,BIRC2,BIRC5,BRCA1,BUB1B,BUB3,CCL1,CCL2,CCL3L3,CCNA2,CCNB1,CCND1,CCNE1,CCNG1,CD274,CD44,CDC20,CDC25B,CDC25C,CDK1,CDKN1A,CDKN2B,CDKN3,CENPF,CEP55,CHAF1B,CHEK1,CIT,CKS1B,CSF2,CSF3,CTSB,CXCL2,CXCL3,DLGAP5,DSE,DUSP1,E2F1,E2F2,EDNRA,EOMES,FANCI,FAT2,FN1,FOXM1,GADD45A,GNAI1,GRN,H2AX,H2AZ1,HJURP,HMGB2,HNRNPA2B1,HSPA5,IFITM3,IFNG,IFNGR1,IL1B,IL1R1,IL3…	1702 (16)
RETNLB	1.024	other	Activated	2.316	4.67162	2.13e-05	ACTA2,AKT1,BMP1,CCL2,CCL3L3,CCR1,CCR2,CCR5,CD86,COL1A1,FGFR1,FN1,FZD1,HEY1,IGF1,IL13,IL1B,IL4,IL4R,IL6,IRS1,JAK1,LAMA1,LMNB1,MAP3K6,NDN,PLA1A,PLA2G15,SFRP1,SMAD1,SOCS2,STOM,TERT,THBS4,TIMP1,TLR2,TNNC1,UBE2C,WNT5A	1421 (14)
GAB2	4.003	other	Activated	2.316	2.09637	0.00801	APP,BCL2,BCL2L1,CCL3L3,CCL4,CD34,CD69,ELK1,FOS,HAMP,IL6,ITGB3,MCL1,S100A9,SERPINE1,SMAD7,TNF	1838 (15)
WR 1065		chemical drug	Activated	2.314	2.38195	0.00415	CASP4,CDKN1A,CPOX,DDB2,GADD45A,GDF15,MDM2,NME1,S100A4,TNFRSF10B,TOP2B,VEGFA,XPC,ZFP36L1	1880 (17)
SH3TC2	-4.046	other	Activated	2.309	1.24795	0.0565	ACSL1,CYP51A1,DHCR7,EGR1,EGR2,HSD17B7,LSS,MOBP,MVD,PMVK,PRX,SQLE
interferon alfacon-1		biologic drug	Activated	2.309	0.723538	0.189	ARL4C,CALM1 (includes others),CD69,CXCL8,GIMAP1,GNLY,HIPK2,IL1R2,PRDX1,SNORD22,SRGN,SSR4
Foxp1		transcription regulator	Activated	2.309	0.493495	0.321	BCL2L1,CNR1,E2F1,E2F2,E2F3,EGR2,FBXL16,FOXP3,IFNG,LMO2,RASGRP2,RYR1
NLRP3	-2.308	other	Activated	2.306	4.58004	2.63e-05	ACTA2,BCL2,BRCA1,CASP1,CCL20,CCL3L3,CCL4,CCR5,CD69,CDCA8,CSF3,CXCL10,CXCL2,CXCR3,DDB2,ESPL1,FN1,FOXP3,GATA3,H2AX,IFNG,IL10,IL13,IL17A,IL18,IL1B,IL4,IL6,KIF1A,LIF,MAPK13,MDM2,NFKB2,NFKBIE,POLB,PPME1,PRIM1,PRKDC,RFC3,STAT3,TACC2,TBX21,TNF,TNFSF13B,TTK,UBE2N,VIM	1314 (14)
CXCL10	-1.513	cytokine	Activated	2.304	2.62709	0.00236	CD274,CXCL10,CXCR2,CXCR3,FOS,GPT,IFNG,IL13,IL1A,IL1B,IL4,IL6,ITGA1,ITGA2,LAG3,TNF	1515 (19)
IFN type 1		group	Activated	2.301	5.74958	1.78e-06	BCL2,BCL2L1,BCL6,BST2,CD69,CGAS,CX3CL1,CXCL10,CXCL13,CXCL8,EIF2AK2,IDO1,IFI16,IFIH1,IFIT1,IFIT2,IFNG,IL12B,IL13,IL27,IL6,IRF1,ISG15,OASL,PLAAT4,STAT1,STAT2,TNFSF10,TNFSF13B,UBA7	1170 (15)
SB 216763		chemical drug	Activated	2.301	3.19723	0.000635	AXIN2,BIRC5,CCL2,CCND1,CD40,CXCL8,DLL4,FGF18,FSCN1,IL10,IL1B,IL6,MYH11,MYLK,PLAU,POU5F1,PRDM1,RGS1,RGS2,RND3,SCD,SNAI1,SOX2,TNF,TNFSF10	1874 (16)
GATA1	-1.023	transcription regulator	Activated	2.3	11.2132	6.12e-12	ABCA2,ABCB10,ABCC4,ACTN1,AFF3,AIP,ALOX5,ALOX5AP,ANGPT2,ANK1,ARHGAP4,BACH2,BCL2,BCL2L1,BCL2L11,BIRC5,BLVRB,BMP6,BTG2,BZW2,CA2,CALR,CAVIN1,CBFA2T3,CCND1,CCND2,CCR1,CCR3,CCR5,CD36,CDK6,CDKN1A,CDKN2C,CDKN2D,CEBPA,CHCHD6,CIITA,CMA1,CNN3,CREG1,CREM,CXCR3,DUT,E2F3,EGR1,EPO,EPOR,ETS1,ETS2,FAM118A,FLI1,FYB1,GART,GATA3,GP1BB,GUCY1B1,HBD,HDAC11,HHEX,HIPK2,HPSE,HSF2,IFNG,IKZF1,IL13,IL4,IL6R,IL6ST,IL7R,IRF8,I…	1739 (20)
HMGB1	-1.946	transcription regulator	Activated	2.297	6.08725	8.18e-07	BRCA1,CCL2,CCL20,CCL3,CCL4,CCNG1,CD274,CD40,CD58,CD80,CD83,CD86,CDKN1A,CXCL2,CXCL3,CXCL8,EGR1,FLT1,GLUL,HLA-DRB1,HLA-G,HMGB1,ICAM1,IFIT1,IFNG,IL10,IL17A,IL1A,IL1B,IL1R1,IL6,IRF5,IRS1,MDM2,MERTK,MIA,MOK,MX1,PTGES,SMAD7,SQSTM1,SYP,TLR2,TLR4,TNF,TNFSF11,VCAM1	1550 (17)
TEAD2	1.119	transcription regulator	Activated	2.294	4.84466	1.43e-05	ADM,ARID5B,CCND1,CCNF,CDK1,EDN1,EDNRA,FGFR4,FILIP1L,FJX1,IGFBP5,KAZN,LIMCH1,MCM6,MTMR10,NFKBIZ,NRXN2,NUAK1,PCDH18,PDGFRL,PTPRO,SAMD5,SLFN5,SULF1,THBS1,TLE1,TP63,UHRF1	773 (7)
CCAT2	-1.023	other	Activated	2.286	1.27003	0.0537	ACTA2,BCL2,CCND1,GLS,LATS2,MMP7,VIM,ZEB2
USF2	-1.103	transcription regulator	Activated	2.282	3.67985	0.000209	ABCA1,ACP5,AGTRAP,APLN,B2M,CCL3L3,CENPX,CHI3L1,CPT1B,CSF2,CYP19A1,EIF4E,FMR1,GATA3,GCK,HAMP,HGF,HOXB4,IFNG,IGF2R,IL17A,KLK3,LGALS3BP,NR5A1,P4HA1,PIGR,SERPINE1,STAR,TBX21,TERT,THBS1,UCP2,XCL1	703 (7)
sodium chloride		chemical - endogenous mammalian	Activated	2.277	0.546682	0.284	ACE,ACTA2,AKR1B1,ATF2,CLTRN,COL1A1,CXCL2,CXCL8,EDN1,FN1,FOS,GPX1,ICAM1,mir-221,mir-223,NOS1,NOS3,NPR1,PTGES,SLC5A2,SLC5A3,SLC6A12,SOD1,TNF,VCAM1,VWF
RPTOR	-1.147	other	Activated	2.276	2.13906	0.00726	BCL2,BCL3,BIRC5,CASP1,CCND1,CCND2,CCR7,CCR9,CD80,CD86,CDK6,CSF1R,CXCL12,CYP51A1,DCSTAMP,DHCR7,FGF2,HSD17B7,ICOS,IFI44,IL10,IL12B,IL17RB,IL1B,IL1R1,IL6,IRF8,IRS1,ITGAM,ITGAX,JAK2,JUN,LSS,LY75,MSMO1,MVD,NLRP3,OSCAR,PIAS2,PMVK,PPP1R3B,RUNX2,SNAI1,SOCS3,SOS1,SPI1,SPRED2,SPTLC2,SQLE,SQSTM1,TBX21,TNF	2006 (21)
HSPG2	5.965	enzyme	Activated	2.275	1.48149	0.033	ACTA2,BCL2,COL2A1,CTSS,CXCR4,DRAM1,EPG5,FGFR3,GADD45A,HSP90AA1,IGF1,PEG3,PRKN,SQSTM1,TCHP
USP1	-1.331	peptidase	Activated	2.258	3.76195	0.000173	BMP6,CAPN2,COL6A2,FANCI,FYN,ITGA5,ITGA6,LOXL2,PGF,S100A4,TIMP1,USP1	109 (3)
arsenite		chemical toxicant	Activated	2.254	4.51286	3.07e-05	ABCB1,ADAMTS16,AHR,CAV1,CCND1,CDH2,CDK14,CDKN1A,CXCL3,CXCL8,CXCL9,CYP1A1,CYP1B1,DDIT3,DUSP1,EGR1,EREG,FOS,FZD1,GADD45A,GCLC,GCLM,HGF,IER3,IGF1,IL10,IL1RAP,IRF1,JUN,KLF2,MAFG,MCL1,MDM2,MPO,NAPB,NBEA,NQO1,PLCB1,PPP1R3C,PRKD1,PRKDC,PTGES2,PTPRG,SEMA5A,SERPINE1,SQSTM1,THBS1,TXNRD1,UGDH,VEGFA,WWOX	1865 (16)
DYRK1A	1.019	kinase	Activated	2.246	3.03198	0.000929	CCNB1,CCND1,CDC25C,CDK1,CDKN1A,DLG4,E2F1,E2F8,IRS1,MCM3,NFKB2,RCAN1,SERPINE1,UBE2C	2386 (24)
FDI6		chemical reagent	Activated	2.246	2.80967	0.00155	BRCA1,CCNA2,CCNB1,CCND1,CCNE2,CDC25B,CDK1,CDK6,E2F2,FOXM1,PLK1,XRCC2
NFkB (family)		group	Activated	2.242	4.82102	1.51e-05	BCL2,BCL2L1,BIRC5,CASP1,CASP4,CCL2,CCL4,CCND1,CXCL10,CXCL12,CXCL8,DCSTAMP,DRAM1,EGFR,FN1,IL10,IL18,IL1B,IL1R1,IL6,IRF1,JAG1,LTA,NLRP3,PLAT,PTK2,RRM2,S100A9,SQSTM1,TIMP1,TNF,TNFAIP3,TNFSF10	1200 (18)
MAPK3	-1.129	kinase	Activated	2.24	9.8041	1.57e-10	ACE,B4GALT1,BCL2,BCL2L11,BMP4,CCL3,CCND1,CCR2,CD69,CD86,CDKN1A,CDKN2B,CSF2,CSTA,CXCL8,E2F1,EGR1,EGR2,FN1,FOS,FOSL1,FOSL2,FOXP3,FURIN,HBEGF,HLA-DQB1,HOMER1,IFNG,IL10,IL13,IL2RA,IL4,IL6,ITGA2,ITGB1,JUN,JUNB,LAMA1,MCL1,MYRF,NOS3,PDGFB,PLA2G4A,PLAUR,PPARA,PTGES,RET,RGS2,SELL,SELPLG,SLC4A7,SMAD3,SOD1,THBS1,TIMP1,TNF,TNFRSF10B,TNFSF11,VEGFA	1499 (16)
KLF7	1.428	transcription regulator	Activated	2.236	1.98716	0.0103	CDKN1A,IFI6,IFIT1,IFIT3,IL1RN,MX1,TNFSF10
murabutide		chemical reagent	Activated	2.236	1.78781	0.0163	CD40,CD80,CD83,CD86,CEBPB
TSC22D1	1.188	transcription regulator	Activated	2.236	1.78781	0.0163	CXCL8,FN1,IL1B,IL6,SERPINE1
IL10RB	1.402	transmembrane receptor	Activated	2.236	1.59176	0.0256	CXCL8,ICAM1,IL10,MX1,SOCS3,TNF
APCS		other	Activated	2.236	1.46725	0.0341	FCGR2A,FCGR2B,IFNG,IL10,SIRPA
MED15	1.323	transcription regulator	Activated	2.236	1.21968	0.0603	BBC3,CCND1,CDKN1A,KCNK1,S100A2
tridecanoic acid		chemical - endogenous mammalian	Activated	2.236	1.02228	0.095	CDKN1C,DDIT3,DUSP5,KLF4,MXD1
thiazolidinedione		chemical drug	Activated	2.236	0.995679	0.101	ABCG1,IRS1,NFATC1,PIK3R1,SORBS1,SPHK1,TNF,UCP2
isoquercitrin		chemical drug	Activated	2.236	0.444906	0.359	CYP51A1,DHCR7,INSIG1,MSMO1,SQLE
PPARα-RXRα		complex	Activated	2.236	0.377786	0.419	ABCA1,CPT1B,IL6,NFKBIA,SLC27A1
S1PR2	1.523	G-protein coupled receptor	Activated	2.235	1.88273	0.0131	ACTA2,FOS,ICAM1,JUN,NOS3,PDGFB,S1PR2,SPHK1,TIMP1,VCAM1
CSF3	12.076	cytokine	Activated	2.232	17.9208	1.2e-18	ACTN1,ADCY1,APBB1,ARHGDIA,ARHGEF10,BCL2,BCL2L1,BEGAIN,BIRC3,BIRC5,CAMK1,CAPG,CCL3,CCL3L3,CCND2,CCNE1,CCR7,CD300LF,CD34,CD44,CDK6,CEBPA,CEBPB,CEBPD,CISH,CNKSR2,CSF3R,CTSD,CTTN,CX3CR1,CXCL12,CXCL2,CXCL3,CXCL8,CXCR2,CXCR4,DLGAP1,DNM3,EDN1,EGR1,EGR2,EGR3,ENPP2,EPS8,ETS1,FLOT1,FOS,FUS,GABBR1,GADD45A,GADD45B,GATA4,GDNF,GFI1,GNG7,GNLY,GPR183,GRIN1,GUCY1B1,GZMB,GZMH,HGF,HLA-DQA1,HLA-DRB1,HOXA7,HSPD1,ICAM…	1799 (14)
JAK1/2		group	Activated	2.229	4.53018	2.95e-05	BCL11B,BHLHE22,CCL2,CD69,CIITA,CNIH2,CTXN1,DDN,DGKG,EIF2AK2,FAM81A,GBP2,GBP5,GDA,GLDC,HLA-DQA1,HLA-DRB5,HPCAL4,ICAM5,IL6,IRF1,IRF7,ISG15,KCNG1,LHX2,MX1,MYO5B,NPTX1,PDE2A,PLAC8,PSD,PTK2B,RSAD2,SLC17A7,TNF	1687 (16)
SPHK1	1.661	kinase	Activated	2.228	8.06048	8.7e-09	ACTA2,APP,BCL2L1,BCL2L11,BIRC2,BIRC3,CCL22,CCND1,CDKN1A,CTTN,CXCL8,DDIT3,DEFB4A/DEFB4B,EGR1,ERN1,FN1,GCH1,ICAM1,IFNG,IL10,IL17A,IL1B,IL6,JUN,MAP2K6,OAS3,PTGES,SERPINE1,SOCS3,SPHK1,TIMP1,TNF,TNFSF13B,TRAF1	1335 (13)
CASP4	1.281	peptidase	Activated	2.228	4.97062	1.07e-05	CASP4,CCL2,CCL3L3,CKAP4,CXCL12,CXCL14,CXCL2,CXCL3,CXCR2,GSDME,IFNG,IL10,IL18,IL1A,IL1B,IL36G,ITGAM,ITGAX,LAIR1,OSM,PLAC8,PLAU,TNFSF14,TNFSF8,TRPM2	1550 (15)
TGIF2	1.083	transcription regulator	Activated	2.224	2.22475	0.00596	ACAT1,ACSS1,ACSS2,MLYCD,PC
C8		complex	Activated	2.224	1.88273	0.0131	CCL3L3,CXCL2,CXCL3,ICAM1,IL1B,VCAM1
C7	5.245	other	Activated	2.224	1.88273	0.0131	CCL3L3,CXCL2,CXCL3,ICAM1,IL1B,VCAM1
ACKR3	-3.403	G-protein coupled receptor	Activated	2.223	3.71444	0.000193	ADM,AXL,BCL2,CCNB1,CCND1,CDKN1A,CSF2,CXCL12,CXCR4,EGFR,HBEGF,IGFBP7,IL24,IL6,RB1,RRAS,STMN1,TNF,TNNC1,VWF	1995 (19)
FOXO3	-1.093	transcription regulator	Activated	2.22	15.5406	2.88e-16	ACTA2,ACVR1,AHR,ANGPT2,ANXA1,APLN,APOM,AR,AURKA,BBC3,BCL2L11,BCL2L13,BCL6,BIRC5,BNIP3,BNIP3L,BPGM,BTG1,BUB1B,CARD16,CASP12,CASP4,CASTOR2,CAV1,CCNB1,CCNB2,CCND1,CCND2,CCNE2,CCNG2,CD44,CDC20,CDC42EP3,CDCA8,CDKN1A,CDKN1C,CDKN2B,CDKN3,CDT1,CEP55,CERS4,CH25H,CHCHD4,CTSB,CXCL10,CXCL8,CXCR4,DDIT3,DEFB4A/DEFB4B,DEPP1,DLGAP5,EDNRB,EGR1,EGR2,EIF4EBP1,ELOVL5,ELOVL7,ENPEP,FBXO32,FBXO5,FOS,FOXC1,FOXM1,FOXO1,F…	2310 (23)
AL162253.2		other	Activated	2.219	2.8962	0.00127	CD274,IDO1,JAK2,PDCD1LG2,STAT1	644 (7)
RGS19	-1.39	enzyme	Activated	2.219	1.46725	0.0341	AXIN2,BMP4,GATA4,MEF2C,MYH7
PCM1-JAK2		fusion gene/product	Activated	2.219	1.46725	0.0341	GATA3,SOCS2,SOCS3,TMPRSS3,TUBB6
GATA5	2.021	transcription regulator	Activated	2.219	0.728158	0.187	EDN1,LCT,MYH6,MYH7,TNNC1
perfluorooctanoic acid		chemical reagent	Activated	2.219	0.643974	0.227	CXCL8,CYP19A1,DNMT3A,EGFR,IL6,PPARA
PIM3	1.107	kinase	Activated	2.218	4.71897	1.91e-05	BCL2L1,CD38,CD44,IFNG,IL12RB2,IL1B,PECAM1,SELL,STAT4,TBX21,TNF	781 (7)
C5		other	Activated	2.218	4.64016	2.29e-05	BCL2L1,C5AR1,CCL3L3,CCL4,CXCL2,CXCL3,IL10,IL1B,IL6,ITGB1,SOCS3,STAT3,TNF	1741 (16)
PIK3CB	1.044	kinase	Activated	2.216	0.522879	0.3	APLN,AR,DLL4,HAMP,IDO1
RPS6KA5	-1.611	kinase	Activated	2.214	5.13608	7.31e-06	CCL20,CCR7,CDKN2B,DUSP1,FOS,FOSL1,IL10,IL12A,IL12B,IL1B,IL2RA,IL6,JUN,JUNB,SNAI1,TNF	1039 (13)
SUB1	-1.105	transcription regulator	Activated	2.213	2.50446	0.00313	ADGRL1,CCND1,FJX1,FOS,GABRR2,GADD45A,HTR3A,KCNA6,KCND1,KCNG1,KCNJ4,MDM2,NDUFB10,RXFP3,VEGFA	1489 (9)
proteoglycan		chemical - other	Activated	2.213	1.78781	0.0163	EBI3,IFNG,IL17A,IL27,IL4
IL17B	3.687	cytokine	Activated	2.213	1.78781	0.0163	BCL2,CDKN1A,CSF3,IL17RB,IL6
TMEM120A	1.34	ion channel	Activated	2.213	1.21968	0.0603	IFIT2,IL6,IRF7,ISG15,RSAD2
short chain fatty acid		chemical - endogenous mammalian	Activated	2.213	0.616185	0.242	ANGPTL4,CHGA,IL10,SCT,TNF
DDR2	1.824	kinase	Activated	2.213	0.522879	0.3	COL1A1,ITGB1,LOXL2,MMP7,SNAI1
CCN2	1.805	growth factor	Activated	2.212	2.81531	0.00153	ACTA2,ADAMTS4,AKT1,BCL2,BCL2A1,BCL2L1,BIRC2,BIRC5,CCND1,CD44,COL1A1,COL2A1,CYP17A1,DAD1,EGLN3,EGR1,FN1,FZD2,HAMP,HES1,HSD17B7,IGF1,IL17A,IL6,ITGA1,JUN,LEF1,LIMS1,LOX,LOXL3,LTBP3,MBNL2,MIA3,P4HA1,PDGFB,PI4K2B,POU5F1,RAMP2,SDC4,SERPINE1,SLC2A3,SOX2,TIMP1,VEGFA	2070 (19)
H19	8.95	other	Activated	2.208	0.522879	0.3	ACTA2,AKT1,COL2A1,SMAD3,STAR
CRH		cytokine	Activated	2.204	5.40121	3.97e-06	AR,BCL2,BDNF,CCNA2,CLEC11A,CXCL8,CYP17A1,DLG4,EDN1,FOS,GNRH1,IL10,IL18,IL1B,IL1RN,IL2RA,IL4,IL6,IVL,JUNB,KCNMA1,KCNMB1,NMB,NOS1,NOS3,POMC,PRKCE,RAMP2,SGK1,SLC2A3,SOCS3,STAR,SYN1,TLR4,TNF,UCN,VDR,VEGFA	1985 (23)
LTBR	-2.292	transmembrane receptor	Activated	2.203	6.4168	3.83e-07	ACTA2,BIRC3,BST1,CCL19,CCL20,CD80,CD86,CLU,CNN1,COCH,CR2,CSF2,CXCL12,CXCL13,DSC3,DSG2,ENPP2,GDA,GPM6B,ICAM1,IL6,JUNB,MFGE8,NFKB2,NFKBIA,PDGFRB,PLXNB1,PRNP,RFX5,RNF19B,TNF,TNFSF13B,TNFSF9,VCAM1	1443 (14)
NOTCH3	2.616	transcription regulator	Activated	2.203	3.63078	0.000234	ACTA2,ACTN1,APOD,BCL2,BIRC5,CDKN1A,CDKN1C,COL15A1,COL18A1,COL5A3,COL6A2,DLGAP5,DTX1,FN1,FOXP3,GUCY1B1,HES1,HES5,HEY1,ID1,IL10,ITGA1,ITGA3,ITGA7,ITGAX,ITGB3,ITGB5,MYH11,NOTCH1,NRARP,PDGFRB,PRAG1,RBPJ,RGS5,VEGFA	1274 (15)
STK38	-1.64	kinase	Activated	2.203	2.22475	0.00596	CCL20,CXCL2,CXCL3,IL6,TNF	1341 (17)
ssRNA40		chemical reagent	Activated	2.202	5.11295	7.71e-06	CD80,CD83,CD86,EBI3,IFNG,IL10,IL12A,IL12B,IL1B,IL23A,IL27,IL6,SOCS3,TLR8,TNF	1186 (17)
NLRC4	2.146	other	Activated	2.202	1.30103	0.05	CD86,CXCL2,CXCL3,IL17A,IL18,IL1B,NLRC4
APOC1	1.427	transporter	Activated	2.2	4.20412	6.25e-05	AKT3,APOE,BCL2,CDH2,FGF2,FSCN1,HSP90AA1,MCL1,MMP7,SMAD3,SNAI1,TIMP1,TNF	2317 (19)
catumaxomab		biologic drug	Activated	2.2	1.78781	0.0163	CD40,CD69,CD80,PDCD1,TNFSF10
CYBA	1.046	enzyme	Activated	2.2	1.35754	0.0439	CDKN1A,FN1,IL6,SERPINE1,TNF,VEGFA
SULF2	6.168	enzyme	Activated	2.2	1.12494	0.075	AXIN2,BCL2,CCND1,COL2A1,GLI1,PDGFA,PDGFB,SMAD1,SOCS2,SOCS3
MAP3K11	1.166	kinase	Activated	2.2	0.860121	0.138	BIRC5,CXCL8,IL4,MMP7,SH3RF1
PDGFRA	9.769	kinase	Activated	2.2	0.764472	0.172	ACTA2,CDKN1A,COL1A1,FOS,MCL1,PDGFRA,RUNX2
CEMIP	5.45	enzyme	Activated	2.199	0.860121	0.138	AXIN2,CDH2,EGFR,FGFR4,STAT3
PK11007		chemical reagent	Activated	2.198	2.22475	0.00596	BBC3,CDKN1A,DDIT3,MDM2,XBP1
ATF6	1.355	transcription regulator	Activated	2.196	6.17457	6.69e-07	APP,AURKA,CALR,CDKN3,CEBPB,DDIT3,DERL3,DNAJB11,DNAJC3,FOS,HMMR,HSP90B1,HSPA5,IL6,LMAN1,LMF1,MANF,MCL1,PDIA4,PLAT,PPARA,PRDX2,PRNP,PVR,RCAN1,SLC35B1,SRR,SYVN1,TNFRSF10B,TROAP,TXNDC5,UBE2C,UNC13B,VEGFA,WBP1,XBP1	2154 (22)
PLAGL1	1.087	transcription regulator	Activated	2.194	1.48413	0.0328	ANGPTL4,CCL20,CCL22,CDKN1A,CSF2,IL10,IL32,LOC102724788/PRODH,LTA,OSM,PPARG,SORD,TNFSF8
AIMP1	-1.07	cytokine	Activated	2.192	4.65561	2.21e-05	CCL2,CCL3,CCL4,CXCL2,CXCL8,ICAM1,IFNG,IL10,IL12A,IL12B,IL1B,TNF	1190 (17)
2-mercaptoacetate		chemical drug	Activated	2.191	5.13608	7.31e-06	ANXA2,CD68,CXCL2,CXCL3,ICAM1,IGF1,IL10,IL12B,IL1B,IL6,MFGE8,PLAU,PPARG,S100A10,TPT1,TREML2	1864 (21)
NTF4	2.704	growth factor	Activated	2.191	0.377786	0.419	DLG4,ENAM,FOS,GAP43,NTRK2
aplidine		biologic drug	Activated	2.19	1.46725	0.0341	DUSP1,FOS,FOSL1,JUN,JUNB
BMX	-1.023	kinase	Activated	2.19	0.522879	0.3	CXCL8,FOS,IL6,TIMP1,TNFRSF1B
LINC00662	1.1	other	Activated	2.19	0.377786	0.419	CCND1,HSPA5,IL10,RNF144B,TNF
IL17C	1.807	cytokine	Activated	2.186	2.91364	0.00122	BCL2,BCL2L1,CCL20,CXCL8,DEFB4A/DEFB4B,IFNG,IL17A,IL19,IL1A,IL1B,IL23A,IL36G,IL6,S100A9,TNF	1296 (8)
BRD7	-1.145	transcription regulator	Activated	2.185	3.67366	0.000212	BBC3,CCNG1,CDKN1A,CYP1A1,FGF2,FN1,FOXP3,KRT8,MDM2,RRM2B,SERPINE1,TRIM22,VCAN,VIM,ZMAT3	2285 (23)
oxysterol		chemical - endogenous mammalian	Activated	2.183	1.27003	0.0537	ABCA1,ABCG1,APOE,CAV1,CCL2,CETP,CXCL8,TIMP1
HOXB7	1.077	transcription regulator	Activated	2.182	1.02228	0.095	ANGPT2,CXCL8,FGF2,HAMP,VEGFA
1-hydroxy-2-methyl-2-butenyl 4-diphosphate		chemical - endogenous non-mammalian	Activated	2.18	4.86967	1.35e-05	CCR7,CD69,CXCL13,IFNG,IL13,IL2RA,IL6,OSM,TNF,TNFSF10
NPM1-ALK		fusion gene/product	Activated	2.179	1.21968	0.0603	CCND2,CEBPB,GLI1,ICOS,KDM6B
S1PR3	-1.936	G-protein coupled receptor	Activated	2.178	2.32698	0.00471	ACTA2,CD44,ETS1,FOS,HGF,ICAM1,IGF1,IL1B,JUN,VCAM1	1434 (16)
NTS	3.53	other	Activated	2.176	1.82391	0.015	CXCL8,FABP6,FOS,GPT,IFNG,IL1B,KLK3,mir-210,POMC,PRL,TNF
BET		group	Activated	2.176	0.522879	0.3	GCLC,IL6,NQO1,SLC4A1,STAT3
TO-901317		chemical reagent	Activated	2.173	0.943095	0.114	ABCA1,ABCA8,ABCG1,ACSL1,ADAM11,ADM,APOC2,APOD,APOE,APOM,APP,ASS1,BCL2L1,C3,CASP1,CASP4,CCL2,CCNB1,CCND1,CD5L,CETP,CH25H,COX17,CYP7B1,DHCR7,EHHADH,ELOVL5,ELOVL6,FADS1,FBP1,FMO5,GAMT,GBE1,GCK,GHR,GPD1,HSD11B1,HSD17B11,HSD17B8,IGF1,IGFBP4,IL1B,IL6,ITGA6,ITIH1,LGALS3,LIPG,LTC4S,MCM6,MID1IP1,MPEG1,NFKBIA,NOS3,PLTP,PNPLA3,PPARG,PRKAB1,PSME1,SAA2-SAA4,SCD,SIGMAR1,SLC27A2,SMAD3,STAR,SYP,TGM2,THRA,TIMP1,T…
CL 316243		chemical drug	Activated	2.173	0.772113	0.169	ATF3,CD36,CKB,CPT1B,GCLM,HILPDA,IL17RB,IL1B,ITGAX,NQO1,PPARA,SCD,TNF,UCP2
IL17RB	5.547	transmembrane receptor	Activated	2.172	0.728158	0.187	BCL2,CSF3,HAMP,IL13,IL6
tamoxifen		chemical drug	Activated	2.164	9.61979	2.4e-10	ABCB11,ABCG2,ACKR3,ADM,AHNAK,ANG,AQP9,ASAH1,ASS1,BCL2,BCL2L1,BDNF,BIRC5,BMP4,BRCA1,BRWD1,C3,CA2,CAV1,CCDC80,CCNA2,CCND1,CD36,CDCA2,CDH2,CDK6,CDKN1A,CEBPD,CLU,COL1A1,CPE,CRYZ,CTSD,CUZD1,CXCL12,CXCL8,CXCR4,DCC,DEPP1,EGFR,EIF4EBP1,EPHA4,ERBB2,ERBB3,ESR2,ESRRA,ETV4,ETV5,F13A1,F2R,FADS1,FAM83D,FANCI,FHL2,FLOT1,FN1,FOS,G0S2,GAP43,GAPDH,GCK,GDF15,GJB2,GPER1,HES1,HGF,HSP90B1,IER3,IGF1,IGFBP4,IL1RN,IL6,IR…	2467 (23)
carbonyl cyanide m-chlorophenyl hydrazone		chemical toxicant	Activated	2.162	1.62893	0.0235	ALOX5AP,BMP6,CCL20,CXCL8,DDIT3,DUSP5,EPHB1,ERRFI1,FBXL13,GDF15,IL1A,IL1B,LAMB3,NAMPT,NFKBIZ,OSCAR,RND3,SERPINE1,ST6GALNAC3,TM6SF1,TMEM154,ZFP36L1
TNC	1.026	other	Activated	2.16	3.46597	0.000342	ADAMTS4,BCL2,CASP1,CCL2,CCL20,CCL3L3,CCL4,CDKN1A,COL2A1,CXCL12,CXCL3,EDNRA,EGFR,EREG,FOS,ID2,IFNG,IL1A,IL1B,IL6,TLR4,TNF,TNFSF11	1380 (16)
GADD45B	1.25	other	Activated	2.159	1.35754	0.0439	BCL2,BCL2L1,BIRC2,CDKN1A,IFNG,MIXL1
mir-24	5.079	microRNA	Activated	2.158	5.96257	1.09e-06	AHR,ARHGAP19,ARNT,BCL2L11,CDH2,CDKN1A,CDKN2B,CXCR3,FN1,FURIN,GATA3,HNF1B,ICOSLG/LOC102723996,ID2,IFNG,IFNGR1,IL12B,IL17A,IL2RA,IL4,IL6,JPH2,NET1,PRDM1,PXN,RORA,SERPINE1,SH3PXD2A,SLC4A1,SPRY2,TBX21,TNF	2094 (18)
ASCL1	1.103	transcription regulator	Activated	2.158	3.20971	0.000617	BIRC5,CCNG2,CDCA7,CDK1,CDK5R1,CDKN1A,CIITA,DCC,DLL3,DLL4,DLX1,E2F1,EPHA2,FOXG1,FOXM1,GAD1,GSX2,HES5,ID1,ID3,IKZF1,KCNIP2,LAMP5,MFNG,NES,NUMBL,PAX8,PCSK6,PDGFRA,PNOC,RET,SALL3,SEMA6B,SEMA7A,SEZ6,SLC35D3,SOX2,SOX9,TEAD1,WWTR1	778 (7)
leupeptin		chemical - protease inhibitor	Activated	2.158	1.75449	0.0176	ABCA1,APP,AXL,CAV1,CD9,FOXO1,ITGB1,SDC1,VRK1
TMSB4		group	Activated	2.158	0.995679	0.101	BMP4,IRAK1,ITGA1,ITGA2,ITGA3,ITGB1,RUNX2,SERPINE1
PRKD		group	Activated	2.157	2.74715	0.00179	CCL3L3,CCL4,CPT1B,CXCL10,CXCL2,CXCL3,DCSTAMP,IFNG,IL10,IL12B,IL1B,IL23A,IL6,PPARA,PPARD,STAR,TNF	1655 (14)
IL1R1	12.691	transmembrane receptor	Activated	2.157	2.14813	0.00711	ABCC3,ABCC5,ACTA2,APP,CCL3L3,CXCL10,CXCL12,CXCL2,CXCL3,CXCL8,EGR1,FOS,ICAM1,IGF1,IL10,IL17A,IL18,IL1A,IL1B,IL1RAP,IL6,MYH11,TIMP1,TNF,TRAF1	1277 (15)
ionomycin		chemical reagent	Activated	2.156	8.51004	3.09e-09	AHNAK,ANKH,BCL2,BCL2A1,BCL2L1,BDNF,CCL2,CCL3,CCND2,CCNG2,CD276,CD4,CD69,CIDEC,CRTAM,CSF2,CSF3,CXCL10,CXCL8,DDIT3,DNAJC3,DNMT1,DUSP1,DUSP2,DUSP5,EBI3,EGR1,EIF2AK2,EIF4E,EIF4EBP1,ETS1,ETS2,FCER2,FGF18,FOS,FOXP3,GATA3,GBP4,GCH1,GEM,GZMB,HPSE,HSPA5,ICAM1,ICOS,IFNG,IKZF1,IL10,IL12B,IL13,IL17A,IL23R,IL24,IL2RA,IL4,IL6,ITM2A,ITPR2,JARID2,KCNJ2,KCNN2,LAT,LTA,NCL,NFATC1,PDCD1,PMCH,PPARG,PRKCZ,PRL,PTAFR,PT…	1737 (17)
CAMK4	1.182	kinase	Activated	2.156	2.64207	0.00228	ABCA1,ATF3,BCL2,BDNF,CDKN1A,CPT1B,CREM,FBXW7,FMR1,FOS,FOSL2,FOXP3,IFNG,IL1B,IL4,IL6,JUN,JUNB,TNF	1874 (19)
MAPKAPK3	-2.287	kinase	Activated	2.153	3.08938	0.000814	BCL2,CCL3L3,CXCL2,CXCL3,DDIT3,HSPA5,HSPB8,IL10,IL13,IL6,TNF,ZFP36	1330 (18)
phencyclidine		chemical drug	Activated	2.153	1.40121	0.0397	BCL2,BCL2L1,CDON,CREM,FOS,GRIN1,IER3,SCG2,SYP
GIP		other	Activated	2.147	4.59007	2.57e-05	ACE,ATF3,BCL2,CCL2,CCL4,CEBPA,CXCL10,CXCL2,CXCL3,FOS,GBP2,GBP5,GBP6,IFIT3,IL12B,IL1A,IL1B,IL1RN,IL4R,IL6,NOS3,OASL,PPARG,RGS2,RSAD2,SERPINE1,SOCS3,STX11,TNF,TNFRSF1B,UCP2	1538 (16)
phorbol 12,13-didecanoate		chemical toxicant	Activated	2.146	1.75449	0.0176	ABCB1,CDK1,CDKN1A,CSF1,DUSP1,HSF2,IL1RAP,KCNN2,MCL1,PRKCE,SGK1,SMAD1,TP73
HNF1A	-1.468	transcription regulator	Activated	2.146	1.10679	0.0782	ABCC9,AKR1C1/AKR1C2,ANXA4,APOM,AQP3,AQP9,ARHGAP11A,ARL17A/ARL17B,ASB7,ATF2,ATP7A,BACH2,BCL2L1,BCL6,BCL6B,BMP2K,BMP3,C1orf50,C1S,CBS/LOC102724560,CCND1,CCNE1,CD302,CD55,CLIC5,CLTRN,COL27A1,CPB2,CREBL2,CYB5A,CYP27A1,DPP4,EBF1,ELF3,EML6,ENPEP,ETV5,F8,FAM107B,FAM111A-DT,FBP1,FCAMR,FGF8,FRK,FUT11,FUT5,FUT7,FUT8,G0S2,GBE1,GCK,GCNT3,GLUL,GNG12,GOLM2,GPATCH2,GPR137B,GTF2E1,GTPBP3,HCAR2,HGD,HHLA2,HNF1B,HN…
GTF2IRD1	-1.147	transcription regulator	Activated	2.144	0.305395	0.495	CUX2,ERAP1,FOS,GNAT1,HAUS8,LRRC66,PLPP2,PPARA,STAT3,TNNI1,VSX2
CpG ODN 2216		chemical reagent	Activated	2.142	3.1798	0.000661	BST2,CD38,CD40,CD69,CD80,CD83,CD86,CXCL9,IFNG,IL12B,IL1B,IL6,IRF7,NCR1,NCR3,OAS3,STAT1,TNF,TNFSF10	1205 (14)
bezafibrate		chemical drug	Activated	2.14	2.33068	0.00467	ABCB11,ABCB4,ABCD1,ACACB,ACAD11,ACADVL,ACOT2,ACOT4,ACSL1,ANGPTL4,APOC2,APOE,BNIP3,CCNB1,CD36,CPT1B,CROT,CYB5A,DECR2,ECH1,EHHADH,HILPDA,HSPA5,ICAM1,INSIG1,JUN,LGALS3,MGMT,NPC2,NTHL1,PEX11A,PPARA,PPARG,SCD,SERPINE1,SLC27A2,TNF,TSPO,UCP2	1628 (16)
CFB	-1.378	peptidase	Activated	2.139	1.48149	0.033	ACO1,C3,C4A/C4B,C5AR1,CR2,CXCL2,CXCL3,DDIT3,HSPA5,IL1B,IL4,ITGAM,MYH6,THBD
DTNBP1	1.266	other	Activated	2.138	0.886057	0.13	ARX,GRIN1,GRIN2A,GRIN2C,GRIN2D,NPAS1,SLC32A1,SLC6A12
HRG	3.991	other	Activated	2.138	0.886057	0.13	CD83,CXCL14,CXCR4,HLA-DQA1,ITGAX,MUC1,SNAI1,TIMP1
PTP4A3	-1.23	phosphatase	Activated	2.137	1.53018	0.0295	AURKA,CDH2,CSK,FN1,HSP90AA1,ITGB3,JUP,PXN,SNAI1,STMN1
ITGA11	-1.84	other	Activated	2.137	0.694649	0.202	ACTA2,COL1A1,FN1,IGF1,INSIG1,PDGFRB,THBS1,TIMP1
CEACAM1	4.292	transporter	Activated	2.135	1.94692	0.0113	ANG,ANGPT2,CD36,CD40,CD80,CD86,COL18A1,CSF3,CXCL8,CXCR4,HEY1,ICAM1,IFNG,IL2RB,NES,NOTCH3,ULBP1,VEGFA
MUC4	2.241	other	Activated	2.133	1.40121	0.0397	CCND1,CDH2,CDKN1A,EGFR,ERBB2,ERBB3,KRT18,SNAI1,VIM
zymosan A		chemical - endogenous non-mammalian	Activated	2.133	1.25337	0.0558	ANXA1,CD40,CD80,CD86,IL10,IL12B,IL1B,IL6,TNF
IFNA10	-1.023	cytokine	Activated	2.13	3.2644	0.000544	CXCL10,CXCL9,IFIH1,IFIT1,IFNG,ISG15,MX1,PLAAT4,STAT4,ZBP1	859 (11)
IFNA5	3.672	cytokine	Activated	2.13	3.2644	0.000544	CXCL10,CXCL9,IFIH1,IFIT1,IFNG,ISG15,MX1,PLAAT4,STAT4,ZBP1	1710 (17)
IFNA7	-1.023	cytokine	Activated	2.13	3.2644	0.000544	CXCL10,CXCL9,IFIH1,IFIT1,IFNG,ISG15,MX1,PLAAT4,STAT4,ZBP1	859 (11)
IFNA6	6.31	cytokine	Activated	2.13	3.2644	0.000544	CXCL10,CXCL9,IFIH1,IFIT1,IFNG,ISG15,MX1,PLAAT4,STAT4,ZBP1	1710 (17)
carbamazepine		chemical drug	Activated	2.129	2.15304	0.00703	ATF3,BCL2,BDNF,CEBPB,CTH,DDIT3,EIF4A1,EIF4EBP1,GDF15,HERPUD1,JAG1,KLF9,MCL1,MED13L,MID1IP1,PIK3C2A,PSAT1,SOS1,SQSTM1,STAT3,STC2,TNFRSF12A,VEGFA	1829 (20)
PPARG	5.794	ligand-dependent nuclear receptor	Activated	2.128	11.0737	8.44e-12	ABCA1,ABCA3,ABCG1,ABCG2,ACSL1,ACTA2,ADRB2,AGPAT2,AKT3,ALOX15B,ANGPTL4,APH1B,APOE,APP,AQP3,ASAP1,BCL2,BCL2L1,BCL6,BDH1,BIN1,BIRC5,BRCA1,C3,CA2,CAV1,CCL1,CCL2,CCL22,CCND1,CCPG1,CCR7,CD274,CD36,CD40,CD68,CDK6,CDKN1A,CDKN2C,CEBPA,CEBPB,CIDEC,COL1A1,CORIN,CPT1B,CR2,CREB1,CSF3,CXCL14,CXCL2,CXCL3,CXCL8,CYP19A1,CYP4B1,DHRS3,EDN1,EDN2,EGFR,EGLN3,EHHADH,EIF4EBP1,ELOVL6,ESRRA,ETS1,F11R,FFAR1,FN1,FOSL1,FOXO6…	2126 (20)
chitin		chemical - endogenous non-mammalian	Activated	2.128	1.6968	0.0201	CCL22,CD274,IL10,IL13,IL1B,IL4,IL6,TLR4,TNF,TSLP
MMP12	5.354	peptidase	Activated	2.128	0.486782	0.326	ACTN1,ACTR2,APP,CCT5,CORO1C,CSF2,CXCR2,FSCN1,ICAM1,IL6,IL6ST,LIF,NFKBIA,PGM1,PLS3,TBCA,TLN2,TNF,VCL,YWHAH
MAP2K6	3.963	kinase	Activated	2.124	4.02549	9.43e-05	ACP5,ACTA2,BCL2,CCL2,CCND1,CD40,CD83,CD86,CDC25C,CDKN1A,CHGA,CXCL10,CXCL8,CXCL9,ESR2,IFIT2,IFNG,IL4,IL6,IRF9,IRS1,ISG15,IVL,JUN,MYH11,MYH6,MYH7,NPR1,OSCAR,PLAU,PRDX1,SLC1A3,SNAI1,STAT1,TNFSF10,VDR	1848 (17)
copper gluconate		chemical drug	Activated	2.123	1.36452	0.0432	BIVM,BRCA1,DCLRE1A,MSH2,NTHL1,POLH,POLI,RBM14,RUVBL1,SMC2,UNG,USP1
GSK2816126		chemical drug	Activated	2.122	0.995679	0.101	BIRC5,CCL20,CD200,CDCA3,CDH2,CKS2,CTNNAL1,CXCL10,FOXO6,HEY1,IL12B,IL6,KCNMB4,PCLAF,POLE,POLE3,RUNX2,SNAI1,TNF,TNFSF10,TNFSF9
VE-821		chemical reagent	Activated	2.121	5.7122	1.94e-06	CCL3,CSF2,CSF3,CXCL2,CXCL3,CXCL8,HERC5,IFI6,IL1A,IL23A,IL6,ISG20,ITGAM,KLF4,OASL,PRDM1,RASGRP3,TNF,TNFAIP3,TRAF1	1449 (7)
Collagen type IV		complex	Activated	2.121	1.12205	0.0755	ACTA2,CCL2,ITGB1,ITGB3,NES,PLAU,PLAUR,SERPINE1,THBS1
DT-061		chemical reagent	Activated	2.121	0.785156	0.164	CAPN8,DKC1,EIF4E,HSPA8,HSPD1,NME1,PTMA,TERT
FLT3LG	1.014	cytokine	Activated	2.117	6.41005	3.89e-07	ADGRE5,BIRC5,CCR5,CCR7,CCR9,CD274,CD40,CD80,CD83,CD86,CEBPA,CEBPB,CXCL12,CXCL2,CXCL3,CXCR4,FOXP3,HOXB4,ICAM1,ID2,IFNG,IL10,IL15RA,IL1B,IL2RA,IL2RB,IL7R,IRF8,ITGAM,MCL1,MPO,PTPRC,RAG1,SOCS1,SPI1,SPN,TCF4,TERT,TNF,TNFRSF18	1789 (14)
bexarotene		chemical drug	Activated	2.117	4.95078	1.12e-05	ABCA1,ABCB10,ADIRF,ADRB2,AKR1C1/AKR1C2,ALCAM,AMOTL2,APOE,APP,AXL,BCL11B,BCL2,BMP6,BRF2,CCL2,CCND1,CLIC6,CRABP1,CTH,DEPP1,DHRS3,DUSP1,DUSP5,EFNA5,EFNB3,EGFR,EGR3,EHHADH,EIF1,EMX1,EPHA2,FKBP2,GDNF,GPM6B,GSX2,HERPUD1,ICAM1,ID1,IER2,IL15,IL1B,IL2RA,IL2RB,ITM2A,ITPR1,KLF10,LOXL2,LRP4,MERTK,MLLT11,MRPL54,NOS1,NRP2,NTRK2,PAX6,PIK3R1,PLAT,PLAUR,PLOD2,PNRC1,PPARG,PTPRO,RABAC1,RET,RHBDL1,S100A9,SCD,SELENOM…	2095 (19)
BCL10	1.194	transcription regulator	Activated	2.117	2.99568	0.00101	CCL4,CD44,CSF2,CXCL2,CXCL8,IFNG,IL2RA,IL6,NFKB2,TNF,TNFAIP3	1323 (15)
Hsp70		group	Activated	2.112	3.35754	0.000439	BCL2,BCL2L1,CD40,CD83,CD86,CDK5R1,CXCL3,CXCL8,FBXO32,FOXM1,GAPDH,GZMB,ICAM1,IL12B,IL15,IL17A,IL1B,IL6,KLK3,NFKBIA,SCNN1B,TCL1A,TNF,TYROBP,VCAM1	1174 (16)
leukotriene D4		chemical - endogenous mammalian	Activated	2.111	6.81816	1.52e-07	APOLD1,ARID5B,ATF3,CCL2,CCL3,CCL3L3,CCL4,CREM,CXCL2,CXCL8,CYSLTR1,DUSP1,EGR1,EGR2,EGR3,FOSL2,GEM,HBEGF,IL13,IL4,IL6,ITGB1,KCNJ2,KLF2,KLF4,LOC102724428/SIK1,MCL1,NEDD9,PDGFRB,RCAN1,RGS2,TNF,ZFP36	1328 (16)
ZFP91	-1.069	transcription regulator	Activated	2.111	3.3279	0.00047	CASP1,CCL19,CCNA2,CDK1,CHEK1,IFI16,MAD2L1,RRM2,STMN1,TNFRSF8,TNFSF13B
KDM6B	1.753	enzyme	Activated	2.111	1.48149	0.033	CCL3L3,CD40,CDH2,FGF5,FN1,GDNF,IL12B,IL6,let-7,NOS3,OASL,SNAI1,TP63,VIM
ASXL2	-1.101	other	Activated	2.111	0.935542	0.116	FAM162A,G0S2,GPD2,HSD11B1,LIPE,PPARG,RAB12,RARRES2,SCD,SERPINE1,VEGFA
BDNF	-2.498	growth factor	Activated	2.11	5.85078	1.41e-06	ADRB2,AGRN,ALDH7A1,ANXA2,ANXA5,AP3D1,APP,AR,ARVCF,ATP1A3,BAG3,BCL2,BCL2L1,BCL2L11,BDNF,C5orf34,CAMK1G,CCND2,CD36,CD40,CD80,CDKN1A,CEBPB,CHGA,CNR1,CSPG4,CXCR4,CYRIA,DUSP1,EGR1,EGR2,EGR3,ELOVL6,EPB41L2,EPO,FOS,FRMD6,FSCN1,GAP43,GDA,GLUL,GNAI1,GNAQ,GPC4,GRIN1,GRIN2A,GRIN2C,H2AC16,HOMER1,HSPA2,HSPA5,IL1B,IL6,ITGB5,ITIH3,ITPR1,JUN,KCNIP2,KIF1A,KIF21B,KLF10,KLF4,LAMB2,LAMC1,LAMP5,LIMK1,LOC728392,MACROD…	1490 (19)
Smad2/3-Smad4		complex	Activated	2.11	2.12205	0.00755	ACTA2,BCL2,CDH2,CDKN1A,CDKN2B,COL1A1,HMGA2,IGFBP5,IRF7,ITGB5,JAG1,SERPINE1,SMAD7,SNAI1,TERT,VIM	2161 (30)
GPER1	-1.91	G-protein coupled receptor	Activated	2.108	6.50724	3.11e-07	ACTA2,ASAH1,ATF3,CACNA1D,CCND1,CDKN1A,CEBPD,CYP19A1,DDIT3,DUSP1,DUSP5,EDN1,EDN2,EGR1,EREG,ERRFI1,ESRRA,FOS,HSPA5,IER2,IGF1,JUN,MT1F,MT1X,MT2A,MYH10,MYH11,NFKBIA,NOTCH1,PTGER4,RGS16,RND1,SLC1A1,TNF,TNFAIP3,TUFT1,ZFP36	2698 (19)
PLAU	3.823	peptidase	Activated	2.108	4.36754	4.29e-05	ABCG1,ACTA2,ANG,BCL2L1,C5AR1,CCL2,CCND1,CCR5,CDH2,CXCL3,EGFR,FLT1,FN1,GDF15,HGF,HSPA5,ICAM1,IGF1,IGFBP2,IL1B,IL6,ITGB5,MDM2,OAS1,OAS3,PIK3CG,PLAU,PLAUR,PLK3,S100A9,SERPINE1,SLFN13,SNAI1,TNF,VIM	2212 (19)
lactic acid		chemical - endogenous mammalian	Activated	2.099	0.709965	0.195	ASIC3,CCL2,CSF2,CXCL10,CXCL12,CXCL8,IFNG,IGF1,IL17A,IL1B,LY96,NCR1,SNAI1,WWTR1
Stat6 dimer		complex	Activated	2.095	1.07417	0.0843	BCL2L1,CCL22,CD36,DUSP1,IL10,IL13,IL4,IL4R,KDM6B,KLF4,LLGL1,PPARD,PPARG,SOCS1
thioacetamide		chemical toxicant	Activated	2.091	5.08197	8.28e-06	ABCC4,ACOT2,ACP5,ACTA2,AKAP12,ANXA1,ANXA2,ANXA4,BARD1,BIRC3,BLM,BRCA1,BRIP1,C4A/C4B,CD200,CD44,CD55,CDCP1,CDH17,CHAF1A,CHAF1B,CIDEC,CKB,CLIP2,CLU,CNR2,COL1A1,CPT1B,CYP1A1,DBN1,EDNRB,EHD3,ELF3,ERBB2,F2R,FANCB,FBLN5,FCGR2A,FGFR3,FOS,GCGR,GPD1,GPNMB,GSTM3,GYG1,HAT1,HGF,HSD17B1,IER3,IFITM2,IGF1,IL1B,IL6,ITGA7,JUN,LAMC2,LGALS3,LGALS3BP,LIN7A,LOX,MCM3,MCM6,MIOX,MSH2,PAX8,PCSK6,PDGFB,PDGFD,PDGFRA,PECAM1…	2313 (21)
histamine		chemical - endogenous mammalian	Activated	2.09	2.48149	0.0033	BCL2L1,BIRC5,CCL2,CCL3,CCL4,CD40,CD80,CD86,CSF2,CXCL10,CXCL2,CXCL8,CXCR4,FOS,GART,GDF15,HBEGF,ICAM1,IFNG,IL10,IL12B,IL13,IL18,IL1B,IL4,IL6,ITGA4,JUN,PAK1,POMC,PTGES,SEMA3A,TJP1,TNF,TNFSF11	1655 (16)
TNFSF10	2.324	cytokine	Activated	2.089	9.84466	1.43e-10	ADRB2,AKT1,ANGPT2,BCL2,BCL2L1,BIRC2,BIRC3,BIRC5,CD274,CD28,CD4,CD69,CSE1L,CTSB,CXCL8,CXCR4,EGFR,EIF2AK2,FOS,FOXP3,GATA3,HLA-A,HLA-C,HLA-F,ICOS,IFI16,IFI27,IFI6,IFIT1,IFITM1,IFITM2,IFNG,IL13,IL17A,IL17RB,IL1B,IL1RN,IL2RA,IL6,IL7R,IRF9,ISG15,ITGAM,JUN,LAT,LCK,LILRB4,MCL1,NFKBIA,ODF3L1,PLAU,PLCG1,PRKCE,PTPN22,PTPRC,RCAN1,SERPINH1,SP100,STAT1,TFRC,TIMP1,TNF,TNFAIP2,TNFAIP3,TNFRSF10B,TNFRSF10C,TNFSF10…	1623 (12)
F7	-1.991	peptidase	Activated	2.089	5.49214	3.22e-06	AR,CCND1,CXCL2,CXCL8,EGR1,FGF5,FOS,FOSL1,GADD45A,HBEGF,ICAM1,IER2,IL1B,IL6,JAG1,LIF,MMP7,PLAUR,PTGER2,RND3,SERPINB2,TNF,VCAM1,VEGFA,ZFP36	1730 (17)
platelet activating factor		chemical - endogenous mammalian	Activated	2.088	7.18642	6.51e-08	ANGPT2,APOM,CCL2,CD69,CDH2,CDKN1A,EGR1,EGR2,FGF2,FN1,FOS,GAS6,ICAM1,IDO1,IL10,IL1A,IL6,ITGAM,MYLPF,NFKBIA,NOX5,PLAU,PLAUR,PRL,PTAFR,SELL,SELPLG,SERPINE1,SOCS3,THBS1,TIMP1,TNF,VEGFA,VIM	1185 (12)
MEF2A	1.132	transcription regulator	Activated	2.082	4.51856	3.03e-05	ARHGAP20,ARHGEF19,BDNF,CD69,CLIC6,CPT1B,CXCL10,DPF3,EDN1,FBXO44,FGF16,FOS,GATA3,GATA4,GBP2,IFI44,IFIT2,IFIT3,IKZF1,IL12B,IL15,IL27,IRF1,IRF7,ISG20,ITGA7,JUN,KLF2,MXD1,MYH6,NOD1,OAS1,RSAD2,SYT1,TGFB3,THBD,TNNC1,ZEB2,ZNF266	1513 (12)
FCER1G	-1.194	transmembrane receptor	Activated	2.082	2.93181	0.00117	CCL3,CCL4,CD247,CD69,CSF2,CXCL8,GATA3,IDO1,IFIT2,IL10,IL12B,IL13,IL1B,IL1RN,IL4,IL6,KIR2DL4,MX1,RSAD2,TNF	1441 (19)
ZAP70	1.363	kinase	Activated	2.081	2.61083	0.00245	ANG,ANXA1,BCL2L11,CCR7,CD69,CLCN1,COL4A5,CSTF2,DNASE1L2,HS2ST1,HSP90AA1,IFNG,IL4,ITPR1,KCNA5,KCNK3,LYPD3,NASP,RBM3,SCD,SLC23A2,SMPDL3B,SSR4,TSC22D3,UBE2L6,XAF1	1304 (18)
IFNA21	1.904	cytokine	Activated	2.079	3.2644	0.000544	CXCL10,CXCL9,IFIH1,IFIT1,IFNG,ISG15,MX1,PLAAT4,STAT4,ZBP1	859 (11)
KITLG	1.604	growth factor	Activated	2.075	9.02919	9.35e-10	ACHE,AIF1,ALOX5,ALOX5AP,AXL,B2M,BCL2,BCL2L1,BCL2L11,BIK,BIRC5,BLVRB,BMP1,BTG1,BZW2,CA2,CASP1,CCL2,CCL22,CCL3L3,CCL4,CCNA2,CCNE1,CD247,CD68,CDC42EP5,CDKN1A,CDKN2B,CEBPA,CIAPIN1,CISH,CLU,CMA1,CREG1,CSF1,CSF2,CSF3R,CX3CL1,CXCL12,CXCL2,CXCL3,CXCL8,CXCR4,CYTH1,EDNRB,EFNB2,EGR1,EPO,EPOR,F2R,FGFR1,FOS,FRK,GAS6,HCK,HNRNPF,HOXB4,ID2,IFNG,IL10,IL13,IL18,IL1A,IL1B,IL1RN,IL4,IL6,ITGAE,ITGB3,KPNA2,LTC4S,MAPK1…	1056 (15)
PTGS1	1.619	enzyme	Activated	2.074	3.96658	0.000108	ANGPT2,ATF3,ATP8A1,CEBPB,EDN1,FGF2,GEM,GZMH,IL1B,IL6,JCHAIN,MYOZ1,NCF1,NOS3,OXTR,PLA2G4A,PTGER2,PTGER4,PTGES,PTGS1,TNF,TNFRSF9,TNNI2,VEGFA	1772 (21)
TSH		complex	Activated	2.073	3.86012	0.000138	AKAP1,ARRB1,CCND1,CCNE1,CDKN1A,CTSS,CXCL8,DAG1,EGR1,FOS,FOXO1,FZD1,GAPDH,GCH1,GNAI1,IGFBP5,IL1RN,IL6,IVL,JUNB,KRT5,LORICRIN,NOS3,PAX8,PPARD,SLC5A5,SOCS1,SOCS3,TG,TNF,TTF2,WNT5A	1930 (17)
NQO1	-1.452	enzyme	Activated	2.07	1.52578	0.0298	BCL2,BCL2L1,BIRC2,BIRC3,BIRC5,C5AR1,CCND1,CCR1,CCR2,CDKN1A,CEBPA,CSF3R,CXCL12,CXCR3,CXCR4,GLS,IL6,PDK1,SPI1,TP73,VCAM1
RPS6KA3	1.062	kinase	Activated	2.07	0.764472	0.172	DDIT3,FOS,FSCN1,IFNG,IL10,TNF,TNFRSF10B
IL17R		complex	Activated	2.067	1.24642	0.0567	CCL2,CCL20,CCL22,CXCL3,CXCL8,DEFB4A/DEFB4B,IL13,IL4,PPARG,S100A9
Growth hormone		group	Activated	2.062	2.96257	0.00109	ACSL1,ADRB2,AKR1B1,ANGPTL4,APLP1,APOE,ARID5B,BCL2,BCL6,BMP4,C3,CCND1,CCND2,CD36,CEBPA,CEBPB,CEBPD,CENPX,CISH,CITED2,CLU,COL18A1,COL1A1,CROT,CTH,CUZD1,CX3CL1,CXCL2,CYP27B1,DDIT3,DDR1,DYRK2,EGFR,EGR1,EPO,FGFR3,FN1,FOS,FOSL2,FZD5,GCLC,GDF15,GHR,GPT,GSTM1,HADH,HES1,HOXA1,ICAM1,ID1,IER3,IGF1,IGFALS,IGFBP2,IGFBP5,IL1B,IL6,IRF1,JUN,JUNB,KLF10,LIPE,mir-29,NAMPT,NEDD9,NFKBIA,NOTCH1,NR2F6,PIK3C2B,PLAAT3,PL…	2151 (20)
heparin		chemical - endogenous mammalian	Activated	2.059	3.85699	0.000139	ACADVL,ACTA2,ALPP,APOE,CASP12,CCND1,CD40,CD80,CD83,CD86,CNN1,COL1A1,DUSP1,EPHB2,FLT1,FN1,FOS,HAMP,HPSE,ICAM1,IFNG,IL10,IL1R1,IL6,IL6ST,PLAT,PROCR,ROCK2,RUNX2,TFPI,THBD,TNF,TNFAIP6,TNFSF11,VCAM1,VEGFA,VIM	1484 (17)
stearic acid		chemical - endogenous mammalian	Activated	2.059	2.44612	0.00358	ATF3,BCL2,BCL2L11,CCL3L3,CLU,DDIT3,EDN1,ICAM1,IL10,IL1B,IL6,MCL1,NFKBIA,NOS3,TNF,WWTR1	1261 (14)
ANXA7	1.025	ion channel	Activated	2.058	1.86012	0.0138	ALOX15B,BRCA1,CCNB1,CDH2,CTSB,DAD1,DCC,DDIT3,EPHB2,FYN,GATA3,GDNF,HGF,IGF1,IL12B,ITGA2,ITGAM,ITPR1,ITPR2,MGST1,NR3C1,PAX6,RAD21,SERPINB6,TFDP1,TNFRSF1B,WT1
TGFB2	-1.047	growth factor	Activated	2.057	5.11748	7.63e-06	ABCA1,ACTA2,AHR,ANGPTL4,BMP4,CD36,CD40,CD86,CIITA,CNN1,COL1A1,COL6A2,DOCK4,EDN1,EGR1,EGR2,FGF2,FN1,FOS,FURIN,HBEGF,HEY1,HSPG2,IFNG,ITGB5,JAG1,LIPG,LTC4S,MIA,MUC4,NOTCH1,PDGFRB,PECAM1,PLOD2,PTAFR,PTHLH,RGS3,RUNX1,SCD,SELL,SERPINE1,SESN1,SMAD3,SPHK1,TGFBR3,THBS1,TIMP1,TMEFF1,TNFRSF11B,VCAN,VDR,VEGFA,WNT11	2169 (17)
calcipotriene		chemical drug	Activated	2.053	3.14813	0.000711	CXCL8,FOS,FOSL1,IL10,IL13,IL19,IL1B,IL4,IL6,JUN,JUNB,OSM,PLAU,PLAUR,PRKCA,SERPINE1,TSLP	1376 (16)
IL31	-5.001	other	Activated	2.052	3.14448	0.000717	BDNF,CCL2,CCNB1,CD86,CDK1,CDK6,CISH,IL6,JUNB,RB1,SOCS1,SOCS2,SOCS3,TRPA1,VGF	1420 (13)
6-hydroxydopamine		chemical toxicant	Activated	2.047	2.32057	0.00478	ACO1,BBC3,BCL2,BCL2L1,BDNF,BNIP3L,C3,CABP1,CALR,CASP1,CEACAM1,CNR1,CXCL13,DDIT3,FOS,GAD1,GAP43,GDNF,GPX1,HEPH,HERPUD1,HSPA5,HSPA8,IFNG,IL10,IL18,IL1B,IL6,JUN,MDM2,NLRP3,P4HB,PDIA3,PNOC,PPIB,SERP1,UBC,ZMAT3	1780 (15)
SGK1	1.391	kinase	Activated	2.038	2.82391	0.0015	BCL2L11,CDK6,CDKN1A,CEBPA,DLG4,GRIN2A,HBEGF,HES5,HOXA10,IL12B,IL6,KCNA2,KCNA3,KCNA5,KCNQ1,KCNQ4,KCNQ5,LIF,PPARG,PRL,SCNN1B,SLC1A1,SLC1A3,SLC2A3,SLC3A2,SLC5A3,SLC6A8,SMO,TNF	2137 (19)
epoxomicin		chemical - protease inhibitor	Activated	2.036	0.603801	0.249	BCL2L11,CXCL8,DDIT3,DMD,FOXO1,H2AZ1,HSPA5,OPTN,SQSTM1,ULBP1
ADCYAP1	-1.023	other	Activated	2.035	7.51286	3.07e-08	ACAT1,ACTN1,AKT1,ARHGEF25,AZIN1,B4GALT3,BCL2,BDNF,BMP6,BTG2,CCL3L3,CCL4,CCNA2,CD40,CD80,CD86,CEBPB,CEBPD,CFL1,CHGA,CHGB,CLCF1,CNN3,CNTNAP4,CREB1,CREBBP,CXCL10,CXCL2,CXCL3,DLL3,DNMT3A,DQX1,EGR1,EGR2,EGR3,EMB,ENPP2,EPHA2,FOS,FRMPD2,FRRS1,GABRB2,GAP43,GATA3,GCLM,GLI1,GNG8,GNRH1,GRK5,H2AZ1,ID3,IER3,IL10,IL12B,IL23A,IL6,IRF1,ITGAM,KIF23,KRT8,LAMA1,LMO1,MAN1A1,MAPK4,MAPK8IP3,MCAM,MCM2,MEST,MOG,MREG,NFK…	2014 (19)
MEMO1	1.039	other	Activated	2.035	2.72354	0.00189	CA2,CCND1,CTSD,FOS,JUN,SNAI1,STC2	2192 (20)
LPL	4.926	enzyme	Activated	2.03	1.73993	0.0182	ACTA2,BCL2,CCL2,CD36,CSF1,CX3CL1,CXCL8,GBP1,ICAM1,IL1B,IL6,IRS1,ITGAX,LIPE,PNPLA2,PPARA,PPARG,SLC27A1,THBS1,TIMP1,TNF,UCP2,VCAM1,VEGFA
RNASE1	1.003	enzyme	Activated	2.028	3.8962	0.000127	CCL1,CCL2,CCL22,CCL3,CCL4,CXCL10,CXCL9,FCER2,IL12B,IL2RA,IL6,IL7,OSM,TNF
paraquat		chemical toxicant	Activated	2.028	2.4908	0.00323	ANGPT2,BCL2L1,BNIP3,CACNA1E,CCDC88A,CCL19,CEBPD,COL1A1,CXCL8,DGKI,DMRTA2,EDN1,FN1,GCLC,GPX1,IL13,IL6,ITGAM,ITGB8,KCNA2,KCNMA1,KIAA1217,KLF2,KLF6,KLHL15,LAMC2,LAMP2,LPIN2,LRP4,MARCHF9,MBOAT2,MUC6,NEAT1,PIERCE1,PLTP,SLC7A11,SLC8A1,SOD1,STON2,TIMP1,TUSC1,UNC13C,VEGFA,ZBTB44,ZHX3,ZNF580	1662 (17)
STIM1	1.084	ion channel	Activated	2.025	5.29671	5.05e-06	ATF5,BCL2L1,CAMK1D,CDK6,CDKN1A,CREB3L1,FLT1,FOSL1,FOXO1,GCLC,GPX1,IL10,IL13,IL6,ITGA5,ITGA6,JUNB,KLF10,KLF2,KLF3,KLF4,KLF7,MYBL1,NQO1,ORMDL3,PRDX1,RB1,SLC5A5,SMO,TG,TNF,VEGFA	1588 (21)
NOX1	-1.491	enzyme	Activated	2.023	1.82391	0.015	CXCL8,DIAPH1,EGFR,FLT1,IL13,NFKBIA,NQO1,PAK1,SMAD7,TNF,VEGFA
BCL2	1.433	transporter	Activated	2.02	3.95861	0.00011	AIF1,BBC3,BCL2,BCL2L1,BCL2L11,BNIP3,CCND1,CCNE1,CCNG1,CDK1,CDKN1A,CHGB,COL2A1,CSF2,CXCL8,FOS,GADD45A,GAP43,GCLC,HAMP,HAVCR2,ICAM1,IFNG,IL10,IL12B,IL15,IL17A,IL1B,IL23A,IL4,IL6,ITGB1,MCAM,MCL1,MDM2,NES,NFKBIA,NNAT,PLAUR,PRDM1,RBL1,SOX9,SPHK1,SQSTM1,TIMP1,TNF,VEGFA	1786 (15)
MMP11	-1.002	peptidase	Activated	2.02	0.342944	0.454	ACACB,ATF6,CD36,HSPD1,HSPE1,PPARA,XBP1
SHH	2.752	peptidase	Activated	2.019	5.97062	1.07e-06	ABCG2,ANGPT2,ATF5,BCL2,BMP4,BRCA1,CAV1,CCNB1,CCND1,CCND2,CCNE1,CCNG2,CD69,CD93,CHEK1,CSF1,CSF1R,DAAM1,DHFR,DTX1,EBF1,EGFR,EMX1,FGF8,FN1,GATA4,GDNF,GLI1,GSX2,H2AX,HES5,HEY1,HGF,HMGA1,HSD11B2,ID1,IFNG,IGF1,IGFBP5,IL10,IL2RA,IL4,IL6,IMPDH2,LFNG,MAGI1,MCM2,MCM3,MCM5,MCM6,MEF2C,MSX1,MYBBP1A,NES,NKX2-5,NOS3,NR2F2,OTX1,PAX6,PAX9,PDGFRA,PGF,PITX2,PLAT,PPARG,PTCH2,PTHLH,PVR,RFC3,RUNX2,SERPINE1,SFRP1,SLC29…	2202 (23)
Pam3-Cys		chemical toxicant	Activated	2.017	4.61618	2.42e-05	CCL2,CD69,CD80,CD83,CD86,CXCL10,CXCL2,CXCL3,CXCL8,ICOSLG/LOC102723996,IFNG,IL10,IL12B,IL13,IL1A,IL1B,IL1RN,IL2RA,IL6,IRAK1,MPO,PLAT,SERPINE1,TLR2,TLR4,TNF	1438 (13)
ELANE	-1.023	peptidase	Activated	2.016	4.17328	6.71e-05	AZU1,C5AR1,CCL3L3,CEBPD,CSF2,CSF3R,CTSB,CXCL2,CXCL8,DDIT3,DEFB4A/DEFB4B,EGFR,FOS,GFI1,HSPA5,IL1B,IL6,LTB4R,MMP7,MPO,OSM,SPI1,TLR4,TNF	1542 (14)
LGALS3	2.261	other	Activated	2.015	3.72816	0.000187	ABCB1,BCL2,CCL2,CCL3L3,CCNB2,CCND1,CCR1,CCR2,CDKN1A,CEBPA,CEBPB,CLEC2B,CXCL2,CXCL3,DDOST,ENPP2,FN1,FSCN1,GPT,ICAM1,IFNG,IGF1,IGFBP5,IL10,IL12A,IL13,IL1B,IL6,ITGA10,ITGA6,ITGAM,ITGB1,KRT18,LGALS12,LGALS7/LGALS7B,LMNB1,ME1,MGST1,MUC1,PNPLA2,PPARG,PRDM1,PRKCZ,RB1,SOCS3,TCF7L2,TNF,VCAM1	1239 (16)
MAP3K1	1.082	kinase	Activated	2.015	2.51004	0.00309	ATF3,BIRC2,BIRC3,CCND1,CSF2,CSTA,CXCL8,DUSP1,EGR1,FOS,IVL,JUN,LOXL3,MUC4,PLA2G4A,PLAU,PLAUR,PPARD,PRDX1,SERPINE1,THBS1,TIMP1,TNF,TOP2A	1809 (19)
CCN1	-1.086	other	Activated	2.014	5.91364	1.22e-06	BCL2L1,BCL2L11,C3,CCL2,CCL3L3,CCL4,CCND1,CCND2,CDKN1A,COL1A1,CXCL10,CXCL2,CXCL3,CXCL8,DVL1,FN1,IFNG,IL10RB,IL12B,IL18,IL1A,IL1B,IL6,IL6ST,ITGA2,ITGA3,ITGA5,ITGB1,ITGB3,JUN,MCL1,MSX1,PECAM1,PLAU,SERPINE1,SFRP1,TIMP1,TLE1,TLR4,TLR7,TNF,TNFSF10,VEGFA,WNT5A	1352 (14)
TGFB1I1	1.12	transcription regulator	Activated	2.012	3.03198	0.000929	AR,CD36,CDKN1A,FN1,FOS,HAMP,ID1,KLF4,KLK3,KRT18,LTBP2,SERPINE1,SMAD7,TNS1	1914 (20)
MAP3K5	2.716	kinase	Activated	2.012	1.82391	0.015	ACE,BCL2L11,CCND1,CDKN1A,CXCL8,IL6,IVL,JUN,LORICRIN,MAP3K5,MSH2
NMU	7.146	other	Activated	2.008	3.61261	0.000244	ATF6,BRCA1,BTG2,CDCA3,CHAF1A,CSF2,DDIT3,IL10,IL13,IL1R2,IL4,IL6,MKI67,MYB,TNFRSF8,XBP1,ZFP36L1	1970 (21)
epothilone B		chemical drug	Activated	2.008	3.3279	0.00047	BTG2,BUB3,CDK1,CDKN1A,MCL1,MDM2,MKI67,TBC1D1,THBS1,TNFSF10,TOP2A	1712 (13)
C3AR1	2.635	G-protein coupled receptor	Activated	2.006	4.00568	9.87e-05	C3,CASP4,CCL3L3,CCL4,CD28,CD40,CD55,CD80,CD86,COL1A1,CSF3,CXCL10,CXCL8,DDIT3,DYRK2,HSPA5,IFNG,IGF1,IL10,IL17A,IL1B,IL23A,IL6,LTBP2,SERPINE1,TNF	1917 (15)
genistein		chemical drug	Activated	2.004	16.4921	3.22e-17	A2M,ABCA9,ABCB9,ACE,ACP2,ACP3,ACP5,ADM,ALDH5A1,ALOX5,ALPP,ANGPTL4,AP3B2,AR,ARSA,ARSG,ASAH1,ATP6V0A1,ATP6V0A4,ATP6V1A,BCL2,BCL2L1,BCL3,BDNF,BIRC5,BMP2K,BTG3,C3,CCL2,CCNB1,CCNB2,CCND1,CCR2,CD4,CD44,CD68,CD80,CD86,CDC25C,CDK1,CDKN1A,CEBPA,CHEK2,CHPF,CHST12,CHST7,CITED2,CKLF,CLN5,CLU,COL1A1,CTSA,CTSB,CTSD,CTSO,CX3CL1,CX3CR1,CXCL10,CXCL12,CXCL2,CXCL3,CXCL8,CXCR2,CXCR3,CYP19A1,CYP1A1,DEFB4A/DEFB4B,DIRA…	2734 (19)
ADRA1A	1.708	G-protein coupled receptor	Activated	2	4.63264	2.33e-05	BDNF,CCNB1,CCNE1,CDK1,CEBPB,CEBPD,CREM,CYP1A1,DUSP1,EGR1,EGR2,FN1,FOS,IL6,IL6ST,JUN,LIF,LOX,MMP7,NFIX,PAK1,PPP3CA,PRRX1,PTHLH,SNAI1,STAT3,TMPO,VEGFA	1444 (16)
LY75	1.398	transmembrane receptor	Activated	2	2.31605	0.00483	CD40,CD80,CD86,FCER2	962 (16)
RAP1A	-1.032	enzyme	Activated	2	2.22475	0.00596	CDKN1A,MMP7,SLC5A5,TG,THBS1	2117 (24)
FITC		chemical reagent	Activated	2	2.21183	0.00614	CD80,CD86,CSF2,CXCL10,ICAM1,IFNG,IL10,IL4,TNF
TIMP1	1.279	cytokine	Activated	2	2.12205	0.00755	A4GALT,BCL2L1,CD38,CD40,CD44,CDKN1A,FCER2,FLT1,HGF,IFNG,mir-210,PLAT,PLAU,PLAUR,PLTP,ST14	1355 (21)
pyruvic acid		chemical - endogenous mammalian	Activated	2	1.84164	0.0144	BCL2,BIRC5,EPO,FOS,SLC2A3,TNFRSF10B,TNFSF10,VEGFA
toosendanin		chemical - endogenous non-mammalian	Activated	2	1.71897	0.0191	EIF2AK2,IFIT1,IRF9,MX1
FT671		chemical - protease inhibitor	Activated	2	1.71897	0.0191	BBC3,CDKN1A,MDM2,RPS27L
p38 Sapk		group	Activated	2	1.71897	0.0191	CCND1,CD80,CD83,CD86
MKNK		group	Activated	2	1.71897	0.0191	IFNG,IL4,SPRY1,SPRY2
CXCR1	1.864	G-protein coupled receptor	Activated	2	1.46725	0.0341	APP,BCL2,BCL2L1,CCND1,CXCL8
MLANA	-6.629	other	Activated	2	1.46725	0.0341	CSF2,IFNG,KLRC1,KLRD1,PMEL
tacedinaline		chemical drug	Activated	2	1.34486	0.0452	ADCY6,ELF3,FOS,NPAS4
LGK-974		chemical drug	Activated	2	1.34486	0.0452	AXIN2,LEF1,NKD1,WNT3
apamin		chemical toxicant	Activated	2	1.34486	0.0452	FOS,JUN,NOS3,VCAM1
Msx3		transcription regulator	Activated	2	1.34486	0.0452	IGF1,JAK3,PPARG,TNF
benzoquinone		chemical - endogenous mammalian	Activated	2	1.07676	0.0838	APOL1,GBP1,IRF1,TNF
ATE1	-1.104	enzyme	Activated	2	1.07676	0.0838	CCND1,JUN,MYH7,REC8
FFAR2	1.102	G-protein coupled receptor	Activated	2	1.02228	0.095	CD36,CXCL8,IL6,PPARG,STAR
volasertib		chemical drug	Activated	2	0.995679	0.101	CDC7,GADD45A,KIF23,MCM2,MSH5,SMC1A,TOP2A,UNG
ETV6-NTRK3		fusion gene/product	Activated	2	0.872895	0.134	IFIT3,IRF7,IRF9,STAT1
PTGER3	1.326	G-protein coupled receptor	Activated	2	0.744727	0.18	AR,HAMP,IL10,IL6,ITGA4,TNF
acrylamide		chemical toxicant	Activated	2	0.716699	0.192	EGFR,FOS,JUN,OPRK1
RASSF6	12.16	other	Activated	2	0.716699	0.192	BBC3,BTG2,CDKN1A,TP73
KPT-9274		chemical drug	Activated	2	0.404504	0.394	BRCA1,BRIP1,MSH2,XRCC2
PDCD5	-1.066	other	Activated	2	0.404504	0.394	DRAM1,FOXP3,SERPINE1,THBS2
valine		chemical - endogenous mammalian	Activated	2	0.279014	0.526	CD83,CDKN1A,PPARA,PPM1K
BGLAP	-1.148	other	Activated	2	0.279014	0.526	CD68,CIITA,NLRP3,TNF
NCF1	1.321	enzyme		1.999	3.2652	0.000543	ACTA2,ALOX5AP,CD44,CDKN1A,EDN1,FN1,ICAM1,IFIH1,IFNG,IGF1,IL12RB2,IL17A,ISG15,SERPINE1,STAT1,THBD,TNF,TNFRSF14	1189 (14)
MI-773		chemical drug		1.998	1.71897	0.0191	BBC3,BCL2L11,CDKN1A,MDM2
1-chloro-2-(2,2,2-trichloro-1-(4-chlorophenyl)ethyl)benzene		chemical toxicant		1.998	1.49214	0.0322	AHR,CDKN1A,CYP17A1,CYP7B1,GADD45A,GADD45B,INSIG2
LAMB1	4.929	other		1.997	2.31605	0.00483	DLL4,ITGB1,JAG1,NOTCH1
IXA4		chemical reagent		1.997	1.34486	0.0452	DNAJB9,HSPA5,SEC24D,XBP1
TEF	1.807	transcription regulator		1.997	1.02228	0.095	BCL2L14,CREM,MYLK,PDXK,PPARA
N-acetylmuramyl-L-alanyl-D-isoglutamine		chemical - endogenous non-mammalian		1.996	4.8729	1.34e-05	ABCA1,AXIN2,CARD9,CASP1,CCL19,CCL2,CCL20,CCL3,CCL4,CD200,CD40,CD80,CD86,CXCL2,CXCL3,CXCL8,DEFB4A/DEFB4B,ETS1,FZD4,ICAM1,IDO1,IL10,IL12B,IL13,IL1A,IL1B,IL23A,IL2RA,IL6,ITGB3,NFKBIA,SNAI1,TNF,TNFSF11,TREM1	1180 (15)
PTF1A	1.904	transcription regulator		1.996	0.477556	0.333	ABAT,CADPS2,CEL,CRABP1,GAD1,GRM3,GSX2,IPCEF1,KLHL14,LAMP5,PAX8,PNOC,PRDM13,SALL3,SEZ6,SLC32A1,SSTR2,TMEM86B
CCL15	8.439	cytokine		1.994	1.34486	0.0452	CREB3,CXCL8,ICAM1,IL6
ARNT	1.284	transcription regulator		1.993	9.59346	2.55e-10	ACER2,ADM,AHR,ALDH7A1,ALDOC,ALOX5AP,ANGPTL4,ANKRD22,ARID5B,BAMBI,BCL2,BHLHE41,BLK,BMPR2,BNIP3,CAV1,CCND2,CCR5,CCR7,CD274,CD81,CDCP1,CEBPB,CITED2,CSF3,CTSD,CXCL10,CXCR3,CXCR4,CYP1A1,CYP1B1,CYP2S1,DEGS1,DEGS2,DPF3,EDN1,ENG,EPO,F5,FLT1,FURIN,GADD45B,GAPDH,GDF15,GLCCI1,GZMH,HAVCR2,HES6,HGF,ID2,IDO2,IL10,IL1R1,IL1R2,ITGB3,KIF20A,LOXL2,NOS3,NQO1,NR3C1,PCDH18,PGM2,RANBP1,RANGAP1,RGS5,S1PR1,SELL,SERPINE1…	2373 (22)
C9	1.904	other		1.992	2.39903	0.00399	CCL3L3,COL1A1,CXCL2,CXCL3,FN1,ICAM1,IL1B,VCAM1	1006 (12)
INHBA	1.874	growth factor		1.99	4.14327	7.19e-05	ACTA2,ACTN1,ACVR1,ACVR1B,ACVR2B,ADRB2,AMMECR1,ATXN7L1,BAMBI,BCL2,BCL2L1,CCL2,CCND2,CCR2,CD24,CD28,CDH2,CDKN1A,CDKN2B,CHD7,CLASP2,CXCL8,CXCR4,CYP17A1,CYP19A1,DTNA,EFNB2,EGLN3,EREG,ETS2,F13A1,FN1,FSTL3,FURIN,GRIA3,HLA-G,HMGB1,IFNG,IGF1,IL10,IL12A,IL6,IRF1,JUNB,KLF4,let-7,LOX,MCL1,mir-221,MIXL1,MYCL,MYH7,MYT1,NKX2-5,NR5A1,PCSK6,PGM2L1,PLOD2,POMC,POU5F1,PPY,PRDM1,PRL,PRLR,PTBP2,RGS16,S100A9,SERPINB2,…	1619 (22)
formaldehyde		chemical - endogenous mammalian		1.989	1.95861	0.011	CYP1A1,EGR1,EGR2,FOS,FOSL1,FOSL2,GABBR1,GHR,GRIN1,IL13,IL1B,IL4,JUN,JUNB,SGK1,SSTR3,TNF
HDAC7	-1.16	transcription regulator		1.989	1.12205	0.0755	ALCAM,CCND1,CD44,CDKN1A,DLL4,EDN1,IL12B,IL6,NFATC1
MAPKAPK2	1.764	kinase		1.988	5.29671	5.05e-06	CCL2,CCL3L3,CEBPD,CITED2,CXCL10,CXCL2,CXCL3,CXCL8,DDIT3,HSPA5,HSPB8,ICAM1,IL10,IL13,IL18,IL1B,IL23A,IL4,IL6,LMO4,LTA,NFKBIA,PLA1A,PLAT,PLAU,RILPL1,TLR3,TNF,TOP2A,VCAM1,ZC3H12C,ZFP36	1202 (12)
SAMSN1	1.291	other		1.987	12.4157	3.84e-13	ARID5A,BBX,CCL3L3,CCL4,CCND2,CD40,CITED2,CXCL10,CXCL2,EDN1,FCER2,FGL2,HBEGF,HDAC1,HELZ2,IFIT2,IFIT3,IFNG,IL12A,IL12B,IL15,IL15RA,IL18,IL23A,IL6,IRF1,IRF7,ISG15,ISG20,LHX2,LMO4,LTA,MERTK,NFKBIZ,NMI,OASL,PLA1A,PLAT,RBL1,RGCC,RILPL1,RSAD2,SDC1,SH3BP5,SLCO3A1,SLFN12L,SOCS1,SOCS3,STAT1,STAT2,TCF4,TIMELESS,TLR3,TNF,TNFSF8,XBP1,ZC3H12A	1594 (22)
pituitary adenylate cyclase-activating polypeptide		biologic drug		1.987	7.6925	2.03e-08	ACER2,ADGRL2,ADM,ARHGAP32,AXIN2,BAMBI,CCND1,CCND2,EGLN3,EGR1,EPHA4,ERRFI1,ETV4,FOSL1,FRRS1,GCH1,HTR3A,ITGA1,MACROD1,mir-132,MMD,NKD1,PLK2,RET,SEMA6D,SLC41A2,SMIM3,STOM,WNT4
IL31RA	1.32	transmembrane receptor		1.987	1.71897	0.0191	CISH,SOCS1,SOCS2,SOCS3
EEF2K	1.144	kinase		1.987	1.34486	0.0452	BCL2L1,CDKN1A,MAP1B,VIM
PROK2	1.064	other		1.987	1.34486	0.0452	BCL2,FOS,IL1B,VEGFA
TAF7L	-1.187	transcription regulator		1.987	0.380907	0.416	AR,CA2,CBY2,EGR3,FSCN1,GAPDHS,GCK,GPD2,NR6A1,ODF1,SGK1,SPATA6,SPATC1,TSKS
dextran sulfate		chemical drug		1.984	22.1002	7.94e-23	ACE,ADA,ADORA2B,AHR,ANLN,AURKA,BCL2,BDNF,BIRC5,BLM,BMP4,BUB1B,C3,C4A/C4B,CASP1,CCL1,CCL19,CCL20,CCL3L3,CCL4,CCNA2,CCNB1,CCND1,CCNF,CCR2,CD36,CD40,CD69,CD80,CD83,CD86,CDC20,CDCA2,CDCA3,CDCA5,CDCA8,CDK1,CDKN1A,CENPE,CHAF1A,CHAF1B,CHGA,CKS1B,COL18A1,CSF2,CSF3,CX3CR1,CXCL10,CXCL2,CXCL3,CXCL8,CXCR2,DCLRE1A,DSCC1,E2F8,EFEMP2,EFNA5,EFNB2,ENG,ENPP2,ERCC6L,ETS1,FANCA,FANCB,FBXO5,FGFR1,FGFR3,FOXM1,GDNF,GLI…	1923 (13)
Fcgr3		group		1.983	2.09098	0.00811	CSF2,CSF3,CXCL8,IFNG,IL1RN,ITGAM,ITGAX,TBX21,TNF,TNFSF4	1756 (16)
CRLF1	-4.669	cytokine		1.982	2.31605	0.00483	CD69,ICAM1,IFNG,IL17A	1644 (16)
RAP1B	1.213	enzyme		1.982	1.71897	0.0191	CCL3L3,CCL4,CSF2,IFNG
CLDN2	-1.992	other		1.982	1.71897	0.0191	CCND1,ITGA2,ITGA5,ITGB1
immune complex		complex		1.982	1.46725	0.0341	IFNG,IL1RN,SOCS1,SOCS3,VCAM1
LTC4S	2.081	enzyme		1.982	1.07676	0.0838	IFNG,IL10,IL13,IL4
Duxbl1		other		1.982	0.872895	0.134	OAS1,OAS2,OAS3,OASL
ADIPOR2	1.14	transmembrane receptor		1.982	0.590067	0.257	GCK,PPARA,PPARG,UCP2
ARID4A	1.015	transcription regulator		1.982	0.488117	0.325	E2F1,EMB,FOXP3,HOXB3
RASGRF1	1.065	other		1.982	0.404504	0.394	FOS,IGF1,IL6,RRAS
clofibric acid		chemical drug		1.982	0.336299	0.461	PPARA,SCD,SERPINE1,VLDLR
dexamethasone		chemical drug		1.981	64.9914	1.02e-65	A4GALT,ABCA1,ABCB1,ABCB4,ABCC3,ABHD2,ACAT1,ACE,ACKR3,ACSL1,ACSS2,ACTA2,ACTG1,ACTG2,ADAM28,ADGRF4,ADGRL1,ADM,ADRB2,AEBP1,AGAP6 (includes others),AICDA,AIF1,AKAP12,AKAP13,AKAP6,AKIRIN1,AKR1C1/AKR1C2,AKT1,ALCAM,ALDH1B1,ALDH1L1,ALOX15B,ALOX5,ALOX5AP,ANGPTL4,ANOS1,ANXA1,AP3S1,APLN,APOD,APOE,APOL6,APP,ARHGAP23,ARHGAP24,ARHGDIA,ARHGEF19,ARL4C,ARRB1,ARRB2,ARX,ASF1B,ASPH,ATF3,ATP11A,ATP1A3,ATP1B1,ATP2B4,A…	2485 (16)
ATP6AP2	1.34	transporter		1.981	0.404504	0.394	ACTA2,ATP6AP2,FN1,IL6
n-nitrosomethylbenzylamine		chemical toxicant		1.98	3.53018	0.000295	ACTR2,AHNAK,ANXA2,AP3S1,ATP6V0E1,CACNA1B,CCND1,CD44,CDYL,CIB2,CTTN,DNASE1L2,DSC3,DUSP5,GCLM,GNG12,GREM1,GSTT2/GSTT2B,H2AZ1,HIP1,HMMR,HSP90AA1,IDH1,KIFAP3,KLF10,LAMB3,LAMP2,LRBA,MCL1,MGST1,MYO10,NDEL1,OLFM3,PCLAF,PECR,PIAS2,PLK3,PLS3,PNOC,PPP3CA,PRKG2,PTGER2,PTGS1,RAB1A,RB1,SCEL,SDC1,TG,TMED2,TUBB6,UBE2C,UBE3D,UBXN4,USO1,YWHAH
LSINCT5	7.052	other		1.98	2.31605	0.00483	BCL2L1,CASP1,IL1B,STAT3
GFRA1	-6.838	transmembrane receptor		1.98	2.31605	0.00483	ACP3,CREBBP,JUN,PTPRC
SSRP1	-1.364	transcription regulator		1.98	1.85699	0.0139	CDKN1A,DUSP5,EGR1,ID2,IFITM1,KRT8,LOXL2,MDM2,MYH6,PDGFA,PLAU,POLR3G,TMTC1,TNNI2,TP53I3
CTH	3.202	enzyme		1.98	1.78781	0.0163	CDKN1A,CTH,CX3CR1,DDIT3,HSPA5
saikosaponin A		chemical reagent		1.98	1.46725	0.0341	BMP4,CDKN2B,FOS,JUN,JUNB
TNFRSF10B	1.718	transmembrane receptor		1.98	1.46725	0.0341	CXCL8,IFNG,IL4,IL6,TNFRSF10B
penicillamine		chemical drug		1.98	1.34486	0.0452	DDIT3,HSPA5,IFNG,IL4
NEK10	1.032	kinase		1.98	1.34486	0.0452	BBC3,CDKN1A,GADD45A,MDM2
OSMI-1		chemical reagent		1.98	1.07676	0.0838	CCND1,CDKN1A,HSPA5,SQSTM1
triacetyl-3-hydroxyphenyladenosine		chemical reagent		1.98	1.07676	0.0838	ABCA1,ABCG1,IL10,TNF
TDGF1	-1.023	growth factor		1.98	0.590067	0.257	JAK1,MYH6,MYH7,STAT3
CDC37	-1.067	other		1.98	0.336299	0.461	CDK6,ERBB2,KLK3,ZAP70
FABP2	-1.023	transporter		1.98	0.336299	0.461	ABCA1,ACACB,PPARA,PPARG
LPAR1	-5.782	G-protein coupled receptor		1.98	0.231362	0.587	CXCL8,GDNF,IL6,SPHK1
sodium tungstate		chemical drug		1.98	0	1	CKB,DPYSL2,HSPA8,INA,SEPTIN5
PLAT	2.233	peptidase		1.979	1.84164	0.0144	BDNF,CCL3L3,CCND1,CXCL10,DDIT3,FN1,FOS,IFNG,IL1B,IL6,JUN,MVP,PLAT,SERPINE1,TLR4,TNF
ghrelin		biologic drug		1.977	2.70115	0.00199	BCL2,EGR1,FOS,IGF1,IL1B,IL6,mir-132,mir-25,SCD,TNF,TNFRSF11B	1810 (22)
RAB2A	1.082	enzyme		1.977	0.764472	0.172	ACSL1,CD36,CIDEB,CIDEC,CYP51A1,PLIN4,PPARG
HOXB9	3.254	transcription regulator		1.977	0.271646	0.535	CXCL8,EREG,FGF2,GLI3,NRG2
BID	-1.112	other		1.976	2.21396	0.00611	C5AR1,CTSB,CTSD,CTSS,CXCL8,GPT,IL1B,IL4,IL6,ITGAX,TIMP1	2041 (18)
PDYN	1.922	transporter		1.976	0.716699	0.192	HOMER1,OPRK1,PLXND1,TNF
chrysotile asbestos		chemical toxicant		1.974	2.82102	0.00151	CCNB2,CDC20,CKS2,CTSS,DNAJC3,GCLC,HSP90B1,HSPA5,IL13,IL1B,IL4,IL6,ITGAX,JCHAIN,PDIA4,TIMP1	1478 (18)
Angiotensin II receptor type 1		group		1.974	2.09098	0.00811	CCL2,CCL3L3,CXCL10,CXCL8,EDN1,GAP43,NOS3,SERPINE1,TIMP1,VEGFA	1496 (22)
Collagen type V		complex		1.974	1.71897	0.0191	ITGA2,ITGA5,ITGB1,ITGB3
Collagen type III		complex		1.974	1.07676	0.0838	ITGA2,ITGA5,ITGB1,ITGB3
ITGB4	1.15	transmembrane receptor		1.974	0.995679	0.101	BIRC5,CCND1,ENPP2,EREG,IL6,mir-29,PTK2,VEGFA
ABCC4	-1.274	transporter		1.974	0.716699	0.192	ABCG2,GLI1,PDE4A,STAR
SQ 29548		chemical reagent		1.97	1.71897	0.0191	CCNB1,CDK1,NFATC1,STAR
Foxo		group		1.97	1.27003	0.0537	ABCB1,BCL2L11,CDKN1A,CDKN2B,FBXO32,GADD45A,IL7R,PAK1
KLF17	3.545	transcription regulator		1.969	2.59517	0.00254	CDKN1A,CORIN,FN1,ID1,IL1RN,IL23A,RB1,TJP1,TNFSF10,VIM	1449 (7)
NCR1	17.854	transmembrane receptor		1.969	2.31426	0.00485	CCL3L3,CCL4,CD69,CSF2,IFNG,NCR1,TNF	1522 (19)
LPAR2	-1.647	G-protein coupled receptor		1.969	1.07676	0.0838	CXCL8,FN1,IL6,SIVA1
AKIRIN2	1.288	other		1.969	1.07676	0.0838	CCND1,CCND2,DUSP1,IL6
androstenediol		chemical - endogenous mammalian		1.969	0.728158	0.187	AR,BCL2,CDKN1A,KLK3,TMPRSS2
IAPP		other		1.969	0.5867	0.259	CYP51A1,FOS,HAMP,MSMO1,MVD,POMC,STAT3
2,5-bis(5-hydroxymethyl-2-thienyl)furan		chemical reagent		1.967	1.46725	0.0341	BBC3,CDKN1A,GADD45A,MDM2,RNF8
CD160	2.366	transmembrane receptor		1.964	2.72354	0.00189	BCL2L1,FOS,IFNG,IL6,JUN,MCL1,TNF	1281 (11)
ARLNC1	-48.32	other		1.964	1.71897	0.0191	AR,KLK2,KLK3,STEAP2
CXCL1	-1.023	cytokine		1.964	1.49214	0.0322	CXCR2,ICAM1,IL1B,IL6,MRAS,SOCS3,TNF
PGRMC1	-1.076	transmembrane receptor		1.964	1.34486	0.0452	BCL2A1,EGFR,IL6,PAQR7
ITIH1	3.044	other		1.961	2.90658	0.00124	IL10,IL12B,IRF5,ITIH1,PPARG,SPHK1,SPINT2,TNF,TNFAIP6,TNFSF14	759 (9)
Rac		group		1.96	0.863279	0.137	CCL2,CCND1,CD9,FOS,IL6,THBS2
LY86	-1.472	other		1.96	0.716699	0.192	CD180,CD80,CD86,TNF
SAT1	2.683	enzyme		1.96	0.522879	0.3	CDKN1A,DHFR,GAPDH,IGFBP2,KLF9
UXT	1.031	transcription regulator		1.958	4.73049	1.86e-05	B4GALT1,BRIP1,CCNA2,CHEK1,CXCL8,F5,GTSE1,IL2RA,KDELR3,KLK3,KRT18,NFKBIA,NKX3-1,PMEPA1,SEC24D,SORD,TLR3,TNFAIP3,TNFRSF10B,TTK	789 (8)
PTK2B	1.369	kinase		1.958	2.4437	0.0036	BCL2L1,CXCL8,FOS,IFNG,IL10,JUN,NEDD9,PTK2,SOCS1,TERT,VCL	966 (16)
F2R	3.945	G-protein coupled receptor		1.955	6.37882	4.18e-07	AKT3,ANGPT2,BCL2L11,BIRC2,CASP4,CCL2,CCND1,CD24,CD44,CD55,CXCL12,CXCL3,CXCL8,DUSP1,ECE1,EGR1,EGR3,F2R,FBP1,FLT1,FN1,FOS,GNA12,GNA13,HAMP,HMGA2,ICAM1,IGFBP7,IL17A,IL1B,IL6,ITGA6,KRT8,LAMB1,LAMB3,MCAM,PLAT,PLAU,PLAUR,PTAFR,S100A4,TFPI,TFPI2,TGM2,THBS1,TJP1,TNFAIP3,VCAM1,VEGFA,VIM,VWF	2170 (19)
LEP	1.796	growth factor		1.955	6.3439	4.53e-07	ABCB11,ABCC3,ACADVL,ACAT1,ACE,ACO1,ACTA2,AKR1C1/AKR1C2,ANGPT2,ANGPTL4,APOM,APP,AQP3,AQP9,AR,ASAH1,ASS1,AXIN2,BCL2,BCL2A1,BCL2L1,BDNF,BIRC5,BMP4,CASP1,CASP10,CASP6,CAV1,CCL2,CCL3L3,CCNA2,CCND1,CD36,CD68,CDKN1A,CEBPB,CEL,CENPX,COL1A1,COL2A1,CPT1B,CROT,CSF2,CSF3,CTCF,CXCL10,CXCL8,CYB5A,CYP17A1,CYP19A1,CYP27B1,CYP2C18,DLL4,E2F3,ECE1,ECH1,EDN1,EGR1,EGR2,EHHADH,ELOVL5,ELOVL6,ERBB2,ESR2,FGFR1,FLT1,FMO5,…	2369 (22)
CXCL8	14.742	cytokine		1.955	5.59346	2.55e-06	ABCB1,ABCG2,ACKR3,ACTA2,ANXA1,AR,BCL2,BCL2L1,CD44,CD69,COL18A1,COL1A1,CPE,CR1,CXCL2,CXCL3,CXCL8,CXCR2,CYP19A1,DEFB4A/DEFB4B,GFPT1,HSPG2,ICAM1,IL1B,IL2RA,IL32,ITGA1,ITGA5,ITGAM,ITGAX,KLF4,KLK3,KRT5,LGALS3,MAPK12,NFKBIA,NR3C1,PAX9,PLD2,POU5F1,SELL,SLC2A3,SOCS1,SOX2,STAR,TNF,TNFRSF10B,TP63,VCAM1,VEGFA,ZFP36	1871 (17)
GAS1	-1.6	other		1.954	1.07676	0.0838	ABCG2,CDKN1A,GLI1,IL6
CRX	3.576	transcription regulator		1.954	0	1	AIP,CACNA1H,CNGA1,GNAT1,PDE6B,RCVRN
RAF1	1.141	kinase		1.953	10.6968	2.01e-11	AKAP12,ANXA1,BCL2,BCL2L11,BCL6,BTG1,CA2,CCL19,CCND1,CD44,CDKN1A,CDKN2B,CDON,CSF2,CSTA,CXCL3,CXCR5,DCBLD2,DHRS3,DUSP2,DUSP5,E2F1,EGR1,EGR3,ELK1,ERBB2,FAM13A,FAM171A1,FOS,GRN,HBEGF,HMGA2,HMGB3,HNRNPA2B1,HSD11B2,ID3,IER2,IER3,IL10,IL12A,IL12B,IL1B,IL1R1,IL23A,IL6,ITGA2,ITGAM,ITGB1,ITGB3,ITGB5,JUN,LAD1,LAMA3,LIF,MCF2L,MCM8,MKI67,MT1F,MT3,MXD1,MZF1,NINJ1,NQO1,PC,PCSK6,PHLDA2,PLAT,PLAU,PLAUR,PLD1,PNP,P…	1604 (16)
TEK	-2.407	kinase		1.953	2.4437	0.0036	APLN,CDKN1A,IFNG,IL17A,IL1A,IL6,S100A9,TJP1,TNF,TUBB3,VEGFA	1471 (16)
2,2'-dipyridyl		chemical toxicant		1.953	1.34486	0.0452	LOX,LOXL2,NTRK2,TMPRSS6
HOXD8		transcription regulator		1.951	0.404504	0.394	ANGPT2,CCNA2,CCNB1,CDK1
POMC	21.366	other		1.95	2.60555	0.00248	ADCY9,BCR,CXCR4,CYP17A1,CYP1B1,DUSP1,FGF2,FOS,FOSL1,FOSL2,GABPA,GAD1,GAPDH,GCLC,GNAQ,GZMB,HSD11B2,ICAM1,IFNG,IL10,IL18,IL6,JUN,JUNB,MC1R,MITF,NCOA2,NOS1,NOS3,NR5A1,PMCH,POMC,SLC9A3R1,SMAD3,STAR,TCF4,TFE3,TNF,UCN,VCAM1	1687 (20)
ROCK2	-1.471	kinase		1.95	1.83565	0.0146	ACTA2,APP,BCL6,BCL9L,CD44,CEBPA,CNN1,CXCL8,CXCR5,DSC2,ICAM1,ICOS,IVL,MYF6,PDCD1,PPARG,PPL,PRDM1,PTK2,SCEL,SERPINE1,STAT3,TXLNA,VCAM1
FPR2		G-protein coupled receptor		1.949	2.49485	0.0032	CCL2,CCR5,CSF1,CXCL8,IL10,IL12A,IL13,IL4,IL6	1382 (14)
PNPLA8	1.309	enzyme		1.949	0.872895	0.134	FBXO32,HSP90B1,HSPA5,NQO1
NSD2	-1.313	enzyme		1.947	5.39469	4.03e-06	BCL2,BTG2,CA2,CCND2,CCNE2,CXCR4,E2F2,FOS,GADD45A,GLS2,HAT1,IGF1,IRF7,ITGB1,ITGB7,JUN,OAS1,PRKCA,ROCK2,RRAS,STAT1,STAT3,TUBB4A,VEGFA	2279 (22)
TNFSF4	2.224	cytokine		1.946	2.19997	0.00631	BCL6,CXCL13,CXCR5,IFNG,IL10,IL13,IL17A,IL4,IL6,NFATC1,PDCD1,PRDM1,TBX21,TNF	1855 (20)
TNFSF11	-1.734	cytokine		1.944	20.2765	5.29e-21	ACP5,ADORA2B,AHR,AICDA,AIF1,AKAP13,AQP9,AURKA,BCL2,BCL2A1,BCL2L1,BMP4,BST1,CA2,CAPN2,CAV1,CCL2,CCL3L3,CCL4,CCND1,CCNE1,CCR1,CD1A,CD300LF,CD40,CD44,CD83,CDC42EP4,CDK14,CDKN1A,CEBPA,CKB,CLEC11A,CREBRF,CSF1R,CSF3,CXCL3,CXCL8,CYP1A1,DCSTAMP,DOK2,DUSP1,DUSP16,ECT2,EGR2,EHD1,ETS1,FAM102A,FHL2,FOS,FOSL1,FOXM1,FOXO1,FRRS1,GABPA,GADD45B,GCH1,GCLC,GPR68,GRN,HCK,HIPK2,HRH2,ICAM1,IER3,IFNG,IGF1,IKBKE,IL10,IL…	1522 (12)
PGF	2.99	growth factor		1.943	6.16115	6.9e-07	ALOX5,ALOX5AP,ANGPTL4,ATF3,BCL2,BIRC2,BIRC5,CASP1,CCL2,CCL20,CCL4,CDK1,CXCL8,CXCR4,E2F2,EDN1,EGR1,EREG,ETS2,FLT1,IL1B,IL6,JAK2,NRP2,SERPINE1,TNF	1766 (16)
NCD-38		chemical reagent		1.943	2.21396	0.00611	ATF3,DDIT3,ERN1,HERPUD1,HSPA5,MYB,NES,PDGFA,POU3F1,SOX2,UHRF1	1694 (19)
Serpin		group		1.942	1.30103	0.05	IFNG,IL10,IL13,IL1B,IL4,IL6,TNF
SLC29A1	-1.69	transporter		1.941	3.82391	0.00015	AQP3,CCNG1,CDKN1A,FDXR,GADD45A,ITGA5,ITGB1,MDM2,RPS27L,RRM2B,SESN1,SNRPG,TP53I3
TERF2IP	1.045	other		1.941	0.694649	0.202	CCL2,CXCL8,EPB41L4A,GASK1B,GRIA3,HS3ST1,NFKBIA,TNF
NR5A2	-1.724	ligand-dependent nuclear receptor		1.938	2.14327	0.00719	ABCB11,ABCB4,ABCC3,ACTA2,ANXA2,APOM,BCL2,C3,C5AR1,CCL22,CCND1,CDKN1A,CEBPB,CEBPD,CEL,CETP,CFP,CXCL10,CYP17A1,CYP19A1,CYP27A1,CYP7B1,FABP6,FOS,GLS2,ICAM1,IL12B,IL1B,IL1RN,IL24,IL32,IL36G,IL6,ITGB1,JUN,JUNB,KLK3,KRT18,MMP7,PLK3,POLE4,POU5F1,STAR,TGFB3,TNF,TNFRSF12A,TNFRSF1B,TNFSF10	2220 (25)
STAT5A	1.005	transcription regulator		1.937	11.7328	1.85e-12	A2M,ABCA1,ABCB1,ABCG1,ANKRD22,APOE,AR,ARNT,AXIN2,BCL11A,BCL2,BCL2A1,BCL2L1,BCL6,BIRC3,C15orf48,CASP4,CASP6,CCL3L3,CCND1,CCND2,CCNE1,CCR5,CD24,CD68,CDC25C,CDC7,CDH17,CDK6,CDKN1A,CDYL2,CEACAM1,CEBPA,CEBPB,CHEK1,CISH,CPA4,CSF3,CXCR3,CYP1B1,CYP27B1,CYP2J2,DUSP5,EGLN3,EOMES,EPOR,ESR2,FKBP14,FOS,FOSL2,GADD45A,GASK1B,GCHFR,GCNT3,GRHL3,GZMK,HAMP,HDGFL3,HENMT1,ICAM1,ID1,ID2,IFITM2,IFNG,IGF1,IGFALS,IL12RB2…	1762 (15)
mGluR		group		1.937	1.98716	0.0103	BDNF,DLG4,EGFR,ERBB2,FMR1,MAP1B,NTRK2
SMARCE1	-1.055	transcription regulator		1.929	2.92082	0.0012	BCL2,BRCA1,CCNB1,CCNE1,CDK1,CDKN1C,CENPE,CENPF,CTSD,FOS,L1CAM,NPC2,SCN2A
BLOC1S5	1.007	other		1.929	2.32698	0.00471	AP3D1,ARX,ATP7A,BLOC1S2,DTNBP1,GRIN1,GRIN2A,GRIN2C,GRIN2D,NPAS1
CRNDE	-7.218	other		1.925	7.09854	7.97e-08	BCL2L1,CDKN1A,DUSP10,DUSP5,DUSP8,E2F3,EGFR,EPHA2,FGFR3,FOXO4,GAB1,GADD45B,IL1R1,PDGFA,PDGFRB,PGF,RASA3,RASA4,RASGRP2,RRAS,SMC1A,STK3,TAOK3,TIAM1,VEGFA	1775 (16)
azoxymethane		chemical toxicant		1.924	2.09745	0.00799	ACE,BBC3,BCL2,BLM,BMP4,CCL3L3,CCL4,CCND1,CDKN1A,CXCL10,CXCL2,CXCL3,CXCR2,DCLRE1A,FANCB,IFNG,IL10,IL13,IL17A,IL18,IL1B,IL4,IL6,ISLR,LRP6,MKI67,MSH2,NOTCH3,PRKCA,PRKCB,PRKCZ,STAT3,TNF	1755 (17)
ORMDL3	1.937	other		1.924	0.616185	0.242	CCL20,CXCL10,CXCL8,OAS1,OAS2,OAS3,TNF,TNFSF13B
CARD9	-2.551	other		1.921	5.11862	7.61e-06	C3,C5AR1,CCR1,CCR5,CLEC7A,CSF3,CXCL10,CXCL2,CXCL3,IFNG,IL10,IL12B,IL1A,IL1B,IL23A,IL6,MPO,NPTX1,TLR2,TLR9,TNF	1371 (14)
nickel chloride		chemical toxicant		1.919	2.14813	0.00711	ADM,BNIP3,CCL2,DNAJA4,EGLN3,GAPDH,GCLC,GCLM,GPX1,HSPB8,IL1B,IL6,JUN,KDM3A,MAP2K6,P4HA1,PHLPP1,PLK3,PPFIA4,SLC22A1,SQSTM1,SRPRB,TNF,TXNRD1,VEGFA	1193 (14)
THBS4	2.081	other		1.919	2.12205	0.00755	ATF6,CALR,CD40,CDH2,COL2A1,CRELD2,CXCL10,HSPA5,HYOU1,ICAM1,MANF,P4HB,PECAM1,SDF2L1,VCAM1,VIM	1600 (21)
MAILR	1.689	other		1.915	0.872895	0.134	CCL19,MYCL,NMRK2,OPTN,PLK2,RRM2B,SLC25A34
Endothelin		group		1.914	0.764472	0.172	APLN,APP,EDN1,FOS,JUN,MYLPF,TNF
ACSS2	-1.815	enzyme		1.914	0.449772	0.355	EHHADH,EPO,LSS,PPARA,PPARG,SCD,SLC27A4
(1S,2R)-NCL-1		chemical reagent		1.913	2.21396	0.00611	ATF3,DDIT3,ERN1,HERPUD1,HSPA5,MYB,NES,PDGFA,POU3F1,SOX2,UHRF1	2042 (21)
IL36B	-1.023	cytokine		1.912	7.00393	9.91e-08	CCL20,CD1A,CD40,CD80,CD83,CD86,CXCL10,CXCL8,IFNG,IL12A,IL12B,IL17A,IL18,IL1B,IL23A,IL4,IL6,NFKBIZ,TNF	1027 (13)
FCMR	2.6	other		1.912	1.7167	0.0192	BCL2L1,GPT,HAMP,IFNG,IL6,NFKB2,TNF
CD19	-1.024	transmembrane receptor		1.912	1.49214	0.0322	IFNG,IL10,IL17A,IL4,IL6,PDCD1,TNF
N(2)-(gamma-D-glutamyl)-meso-2,2'-diaminopimelic acid		chemical reagent		1.912	1.30103	0.05	CASP1,CCL3,CCL4,CXCL8,ICAM1,IL1A,IL1B
RHOB	-3.24	enzyme		1.912	0.995679	0.101	CDKN1A,CXCL8,EGFR,ICAM1,IL6,ITGB3,RHOB
GF 120918		chemical reagent		1.912	0.514279	0.306	APP,CAMK2D,CTSA,PIK3C2A,PLK3,TIGAR,TTK
TNFRSF1B	1.569	transmembrane receptor		1.91	1.93554	0.0116	ABCC3,ANGPT2,BCL2L1,BIRC2,CCR5,CD69,CSF2,CXCL12,CXCL13,CXCL2,CXCL8,EFNA1,FOXP3,GAP43,ICAM1,IFNG,IL12B,IL2RA,IL6,ITGB5,JUN,let-7,mir-130,mir-221,mir-320,NEFH,NTN1,P2RX7,PDGFA,PRDM1,SELL,SERPINE1,SOCS3,SRC,TIMP1,TNF,TNFAIP3,TRAF1,TYMP
IFNL3	3.661	cytokine		1.908	4.25181	5.6e-05	IFIH1,IFNG,IFNLR1,IL12A,IL12B,IL15,IL23A,IL2RA,ISG20,MX1,RSAD2,SOCS1,STAT1,TLR2,TLR3,TLR4,TNF,USP18	1575 (15)
Stat5 dimer		complex		1.902	3.14813	0.000711	BCL2,BCL2L1,BCL6,BIRC3,CCND1,CCND2,CXCR5,EBF1,IFNG,IGF1,IGFALS,LALBA,MCL1,SOCS1,SOCS2,SOCS3,TLR2
MEFV	1.153	other		1.901	1.78781	0.0163	CASP1,CXCL8,DEFB4A/DEFB4B,IL1B,MDM2
Hsp90		group		1.898	3.92812	0.000118	AHR,AKT1,AR,AXL,BAG3,BCL2L1,BCL6,CCND2,CD28,CD4,CD69,CDK1,CIITA,CLU,DLG4,EGFR,ERBB2,ERBB3,FN1,FOXM1,HDAC6,IFNG,IL6,KLK3,KLRD1,LCK,LYN,MCL1,NCR1,NCR3,NOS1,SLC6A4,SNAI1,SRC,SYN1,SYP,TNF,WT1,ZAP70,ZFAND2A	2132 (17)
IKBKE	-1.455	kinase		1.894	3.55284	0.00028	AICDA,ALDOC,BCL2,BIRC2,BIRC3,CCL3L3,CCND1,CSF3,CXCL10,CXCL12,CXCL2,CXCL8,DLST,FCAMR,FCRL5,GLI1,HLA-A,IFI16,IFIH1,IFIT1,IFIT2,IFIT3,IKBKE,IL17A,IL1A,IL23A,IL6,IL7,IRF7,NFKBIA,PDK3,PGM1,PGM2,PGM3,PSAT1,PYGL,RSAD2,SLC2A3,STAT1,TNF	978 (15)
lauric acid		chemical - endogenous mammalian		1.893	1.96658	0.0108	CCL3L3,CD40,CD80,CD86,CXCL8,DEFB4A/DEFB4B,IL1A,IL6,TNF
RETN	1.905	other		1.891	0.872895	0.134	CCL2,CX3CL1,CX3CR1,CXCL3,EDN1,FOS,FURIN,HMGB1,ICAM1,IL1B,IL6,MKI67,NOS3,PLAT,SCD,SERPINE1,SOCS3,STAT3,TLR4,TNF,VCAM1
TENM1	6.359	transmembrane receptor		1.89	2.72354	0.00189	CHL1,EDNRB,ERBB3,GPNMB,SEMA6A,SLC1A4,SOX5
BQ-788		biologic drug		1.89	2.31426	0.00485	AQP9,CTNND1,CXCL2,EDN1,LAMA1,MCAM,TNF	1253 (12)
GPX8	-1.023	enzyme		1.89	2.31426	0.00485	CD44,CSF3,CXCL10,FN1,IL15,IL1B,IL6	896 (7)
FRS3	-1.099	other		1.89	2.31426	0.00485	CCL2,CCL3L3,CCL4,CXCL12,IGF1,IL18,IL1B	1891 (17)
BMS-754807		chemical drug		1.89	1.7167	0.0192	BCL2,BIRC5,CCNA2,EGFR,EPHA4,ERBB2,MKI67
orlistat		chemical drug		1.89	1.7167	0.0192	CCL2,CCL3L3,CXCL8,DDIT3,HSPA5,ICAM1,VEGFA
48s		complex		1.89	1.13668	0.073	ATF5,BCL2,CCND1,CDK11A,DDIT3,HSPA5,VEGFA
HIRA	1.004	transcription regulator		1.89	0.995679	0.101	CXCL2,EFNB2,EREG,FLT1,PGF,PLXDC1,SPHK1
ITGA3	1.557	other		1.89	0.728158	0.187	FN1,ITGA2,PLAU,SERPINE1,VCL
POU2F1	-1.412	transcription regulator		1.885	4.71897	1.91e-05	A2M,ACSL1,ATF2,BBC3,BCL6,CCND1,CCNG1,CD55,CR2,CSF1R,CXCL8,CXCR5,CYP1A1,CYP2J2,ELK1,ELK3,FRRS1,GADD45A,GAS6,GBP2,GCLM,GNRH1,GSTM1,GSTM3,GSTM4,H2AX,HK3,HNF1B,HOMER3,ICAM1,IDH1,IL17A,IL6,KLK3,NXN,OLR1,PDE9A,POU2F1,PRDX2,PTGES,PURB,REL,SELENOP,SERPING1,SESN2,SLC7A11,SOD1,TLR4,TMPRSS2,TNFAIP3,TNFRSF14,TNNC1,VCAM1,VWF	2048 (13)
dimethylnitrosamine		chemical toxicant		1.881	1.22403	0.0597	ACTA2,ARRB1,BMP3,CDKN1A,COL1A1,FGFR4,ICAM1,IGFBP5,IL1B,IL6,NQO1,PRKCH,PRKCZ,RAB13,TGM2,TIMP1,TNF,VIM
PGR	-2.282	ligand-dependent nuclear receptor		1.879	28.9208	1.2e-29	ABCG2,ACP5,ACSL1,ADARB1,AK4,AKAP13,AR,ARNT,ATP1B1,BCL2L1,BCL6,BIRC2,BIRC3,BTG1,CAPN2,CCNB1,CCNB2,CCND1,CD36,CD44,CDC20,CDC42BPA,CDK1,CDKN1A,CDKN1C,CEBPA,CEBPB,CEBPD,CKAP4,COL6A1,COL6A2,CPT1B,CREB3L2,CTBS,CTSD,CXCL8,CYP19A1,CYRIA,DDX60,DNAJB4,DPYSL2,DST,EDN1,EDNRA,EFNA3,EGFR,ELL2,ENC1,ERBB2,ESRRA,EZR,FLOT2,FN1,FOS,FOXC1,FOXO1,GAS6,GATA3,GBP1,GLS,GLUL,GPER1,GPRC5A,GRIA3,GRK4,GSTM3,HBEGF,HES1,HSD11B…	2794 (20)
GNA13	-1.296	enzyme		1.879	1.82391	0.015	ACTA2,CNN1,CXCL2,CXCL3,CXCL8,EGR1,FOS,GNA13,MAP3K5,MYH11,VEGFA
ELAVL1	-1.202	other		1.877	7.51286	3.07e-08	ABCA1,ACHE,ACTA2,APOD,ARHGDIA,ATF3,AXL,B2M,BCL2L1,CALM1 (includes others),CCNE1,CD68,CD83,CD86,CDH2,CDKN1A,CEBPA,CENPA,CENPE,CTSS,CYP51A1,DNMT3A,DUSP1,EIF4ENIF1,FCGR2A,FOS,FOXP3,GATA3,GBP6,GLS2,HLA-A,HLA-DRB5,HNRNPD,HOMER2,HSPA2,ICOS,IFI16,IFI44,IFIH1,IFITM3,IFNG,IL12RB2,IL13,IL17A,IL1R1,IL1R2,IL4,IL6,IRF1,IRF9,JCHAIN,KIF11,KIF18A,LGALS3BP,LGALS9B,MPEG1,NCAPG,NCL,NEK2,NFKBIA,NUF2,OAS1,OAS2,PBK,PC…	1975 (20)
PTGS2	-1.637	enzyme		1.872	10.3152	4.84e-11	AIF1,ANG,ANGPT2,ANXA1,ANXA2,AXIN2,B2M,BBC3,BCL2,BCL2L1,BIRC3,C5AR1,CALR,CCL2,CCL3L3,CCL4,CCND1,CCNE1,CCR7,CD274,CD44,CD68,CDKN1A,CDKN2C,CHGA,CLEC12A,CLEC7A,CLU,CSF3,CTSD,CXCL10,CXCL12,CXCL14,CXCL3,CXCL8,CXCR2,CXCR4,CYP19A1,CYP1B1,DUSP1,EDNRA,EGR1,ERBB2,ERBB3,ESRRA,EZR,FLT1,FN1,FOS,GATA4,GRIN2A,HBEGF,HLA-A,HLA-DQA1,HLA-DQB1,HLA-DRB5,ICAM1,IDO1,IGF1,IL10,IL12A,IL1B,IL23A,IL6,ITGA6,LORICRIN,MAPK9,MC…	1527 (14)
Cdc42		enzyme		1.871	6.58004	2.63e-07	ACTA2,AKT1,APP,ASAP1,ATP6V1A,BCL7C,BRCA1,CASP1,CD86,CDC20,CEBPA,CENPA,COL2A1,CSF1,CTSA,CTSB,CTSD,CTSS,DKC1,EDN2,EIF4A1,EIF4EBP1,EMP2,EREG,ETV5,FADS3,FGF2,FLOT2,GFI1,LAMP2,LIF,MCM3,MYBBP1A,NHP2,NME1,NPC2,PTPRS,SDC1,SH2D4A,SPI1,STMN1,SULF2,TNF,TNFRSF12A,TNFRSF13C	1195 (18)
IFI16	1.277	transcription regulator		1.869	4.48413	3.28e-05	CCL2,CCL20,CCL3,CCL4,CCND1,CD28,CD81,CDKN1A,CSF3R,CXCL10,CXCL8,CYP1A1,DHFR,E2F2,EDN1,FOXP3,GADD45A,GATA4,GPX1,ICAM1,ID2,IFI16,IL1B,IL1RN,IL2RB,IL6,IL7R,ISG15,KPNA1,MDM2,MGST1,MPO,NFKBIA,NKX2-5,OAS1,SOD1,STAT2,TERT,TNF,VCAM1	1886 (15)
TEAD3	-1.748	transcription regulator		1.863	4.12321	7.53e-05	ACTA2,ADM,AMOTL2,ARID5B,EDN1,EDNRA,FILIP1L,FJX1,IGFBP5,KAZN,LATS2,LIMCH1,MTMR10,MYH7,NFKBIZ,NRXN2,NUAK1,PCDH18,PDGFRL,PTPRO,SAMD5,SLFN5,SULF1,THBS1,TLE1,TNNC1,TP63
VIM	-3.998	other		1.863	2.25806	0.00552	AXL,CCL2,IL17A,IL4,ITGB1,KCNJ2,LFNG,MFNG,NOTCH1,PLAU,PTK2,RAB25,SOX2	1886 (21)
caspase		group		1.858	4.34969	4.47e-05	ACER2,APP,BCL2,CCND1,CCND2,CCNE1,CDK1,CDK6,CDKN1A,EGFR,GLUL,HERPUD1,IL1A,IL2RA,MCL1,NCF1,RB1,THBS1,TNF	1888 (18)
FOXC2	1.439	transcription regulator		1.858	2.11805	0.00762	ACTA2,ADD1,ADRB1,ADRB2,ANGPT2,CDH2,CEBPA,COL1A1,COL2A1,CXCR4,EFNB2,FGFR3,FN1,GPNMB,HES5,IRS1,ITGB3,ITGB5,LEF1,LFNG,LIPE,NOTCH1,PDGFRB,PPARA,PPARG,RUNX2,SATB2,SLC35F3,SNAI1,SOX9,SSTR2,TCF15,TNFSF11,VIM,WNT5A	1448 (18)
CTSK	1.044	peptidase		1.857	2.21183	0.00614	BCL2,CCL2,CDKN1A,IL6,NLRP3,PPARG,TLR2,TLR4,TLR7	1518 (17)
AR	5.333	ligand-dependent nuclear receptor		1.856	15.762	1.73e-16	AASS,ABCA1,ABCC4,ABCG1,ACBD7,ADGRA3,ADM,AKT1,ALOX15B,AQP3,AR,ARHGAP21,ARL8A,ARLNC1,ARMC12,ARMCX2,ASB7,ATAD2,ATP1A3,ATP8A1,B4GALNT1,BCL2,BCL2L1,BCL2L11,BEND4,BIRC5,BMF,BMP4,BMPR2,BOP1,BPGM,BRCA1,BUB1B,C3,C4A/C4B,CA4,CACNA1A,CADM3,CALU,CAMKK2,CAV1,CCDC85B,CCL3L3,CCNA2,CCND1,CD302,CDC25B,CDC25C,CDCA5,CDH2,CDK14,CDKN1A,CDKN2B,CDT1,CEBPB,CEND1,CENPE,CERS6,CHPT1,CHRNA1,CHRNB1,CIT,CITED4,CKAP4,CLCN1,CLD…	2489 (20)
HDAC1	-1.262	transcription regulator		1.849	14.2388	5.77e-15	ABCB1,AGTRAP,AKAP12,ALCAM,ANGPT2,AR,ATF3,AXIN2,BAMBI,BBC3,BCL6,BDNF,BMF,CCNA2,CCNB1,CCNB2,CCND1,CCND2,CCNE1,CCNE2,CCR8,CD1D,CD27,CD34,CD4,CD44,CDC25C,CDK1,CDKN1A,CDT1,CEACAM1,CEBPA,CENPX,COL1A1,COL2A1,CSF1R,CXCL8,DDX4,DENND2B,DHFR,DUSP1,E2F2,EGFR,EGR1,EHMT2,FLT1,FN1,FOS,FOXM1,FOXP3,GABARAPL1,GFI1,GLI1,GLUL,H2AX,HES1,ID1,IL10,IL13,IL17A,IL1A,IL1B,IL24,IL4,IL6,INA,ITGAD,KLK2,KLK3,LAT,LMO2,MCM10,MCM…	2317 (22)
PTTG1	-1.237	transcription regulator		1.842	1.64782	0.0225	BCL2,CCNA2,CCNB1,CCND1,CD44,CDH2,CDKN1A,CDKN2D,CEBPB,CEBPD,CHEK1,CLU,DCLRE1A,FGF2,IGF1,MDM2,MGMT,MLH3,NTHL1,POLE,POLH,POLI,SLC5A5,SMC1A,SNAI1,SOX2,TERF1,UNG,VEGFA,VIM
vitamin K3		chemical drug		1.842	0.869666	0.135	BCL2,BMP6,CCL20,DDIT3,DYRK2,EGLN3,EGR1,FOS,HSPA5,IL1A,KLF6,NAMPT
vitamin K2		chemical drug		1.841	1.88273	0.0131	ABCB1,AKR1C1/AKR1C2,AR,CD24,COL6A1,CSF1,DSE,MATN2,TNFRSF11B,TSKU
cis-urocanic acid		chemical drug		1.841	1.82391	0.015	AKR1C1/AKR1C2,CD55,CXCL8,EGFR,GADD45B,IL6,KCNK1,SERPINB2,TNF,TNFAIP3,ZNF165
bee venom		chemical - endogenous non-mammalian		1.84	6.78252	1.65e-07	CCNB1,CDC42EP4,CREBBP,CREM,CXCL8,CYTIP,DDIT3,EHD1,ETS2,FYB1,GADD45A,GEMIN4,GPR35,ICAM1,IL10,IL1B,IRF1,ITGA5,ITPKC,JUN,JUNB,KIF23,KIFC1,KLF2,KLF4,LCP2,LPIN2,MKI67,NFKBIA,NLRP3,NOS3,NUPR1,NUSAP1,OASL,OSM,RCAN1,RGS1,RGS2,SERPINB2,SLC7A11,SOCS3,TAMALIN,THBD,TNF,TNFAIP2,TNFAIP3,TOP2A,TRAF1,YBX3,ZBTB7A	1559 (12)
TREM1	4.459	transmembrane receptor		1.839	26.5436	2.86e-27	ACKR3,ADORA2B,ADRB2,ARRDC4,ASPH,ATF3,ATP1B1,BCL2,CCL20,CCL3,CCR7,CCRL2,CD1A,CD274,CD83,CD86,CDK1,CDKN2B,CEBPB,CKS2,CRTAM,CSF1,CSF2,CXCL10,CXCL2,CXCL3,CXCL8,CXCR4,DCSTAMP,DEFB4A/DEFB4B,DTNBP1,EBI3,EDN1,EGR1,EGR2,EGR3,ELOVL7,EPM2AIP1,ETS2,FERMT2,FNDC3A,FOSL1,GADD45B,GCLM,GEM,GPRC5A,GREM1,HBEGF,HECW2,HES1,HES4,HOMER1,HS3ST3B1,HSD3B7,HTRA4,IDO1,IFIT2,IFNG,IL10,IL12B,IL15RA,IL17A,IL1B,IL1R1,IL23A,IL4,…	1535 (14)
IL36A	-21.385	cytokine		1.836	5.20831	6.19e-06	CCL20,CD40,CSF2,CSF3,CXCL10,CXCL2,CXCL3,CXCL8,IFNG,IL12A,IL12B,IL17A,IL1A,IL1B,IL23A,IL36A,IL36G,IL4,IL6,NFKBIZ,S100A9,TNF	855 (11)
MMP1	1.852	peptidase		1.833	1.93181	0.0117	BCL2,BRCA1,CCNE1,CDKN1A,CXCL12,CXCL8,E2F1,ERBB2,FN1,FOS,IGF1,JUN,MDM2,NFKBIA,PDGFA,PLAU,PLTP,PTGES,RUNX2,S100A4,SERPINE1,TNF
7-ketocholesterol		chemical - endogenous mammalian		1.832	0.8041	0.157	CXCL8,CYP1A1,DDIT3,EGR1,ENG,GNAI1,HSPA5,ICAM1,KLF6
PIK3CD	-1.022	kinase		1.826	2.84164	0.00144	BCL2,BCL2L1,BCL2L11,CCL19,CCL3,CCL4,CCNA2,CCND2,CCNE1,CHAC1,CXCL8,EDEM1,HSPA5,IDO1,IFNG,IL17A,IL4,LTBR,PDIA3,PDIA4,PRDM1,TNF	1952 (18)
KLF4	7.167	transcription regulator		1.823	7.97881	1.05e-08	ACTA2,ACVR1,ADRB2,AIF1,ALCAM,BCL11B,BCL2L1,BUB1B,CBFA2T3,CCL1,CCL2,CCNA2,CCNB1,CCND1,CCND2,CD34,CD44,CDKN1A,CDKN1C,CDKN2B,CEBPA,CENPE,CHST15,CNFN,COBLL1,COL1A1,CSF1R,CXCL3,CXCL8,CYP1A1,DLL4,DUSP1,DUSP5,DYRK2,E2F1,EOMES,EPCAM,EPHA2,EYA1,FGF5,FLT1,FN1,FOXM1,GADD45A,GATA4,GBP3,GBP4,GJB2,GPER1,GRHL3,HAND1,HBEGF,HES1,HEY1,HLA-DQB1,ID3,IER5,IFITM3,IL10,IL15,IL17A,IL23A,IL32,IL6,IL7,IRF6,IRS1,ITGAD,ITGA…	2051 (20)
LAT	1.614	other		1.821	2.32698	0.00471	CD69,CSF1,FOXP3,IL10,IL13,IL2RA,IL4,IL6,NFATC1,TNF	1639 (16)
NGF	8.944	growth factor		1.816	13.032	9.29e-14	A2M,ACER2,ACHE,ADGRL2,ADM,AGRN,AKT1S1,ANXA2,APOBEC3G,APP,ASIC3,ATF3,AXIN2,BAMBI,BBC3,BCL2,BCL2L1,BCL2L11,BDNF,BIRC5,BTG2,CAV1,CCL4,CCND1,CCR7,CD40,CD80,CD83,CD86,CDK1,CDK5R1,CDKN1A,CHGB,CHRNB4,CITED2,DHX9,DLG4,DUSP1,DUSP8,E2F2,EGFR,EGLN3,EGR1,EGR2,ELK1,EPHA4,ERRFI1,ETV4,ETV5,FOS,FOSL1,FOSL2,FRRS1,GADD45A,GAP43,GCH1,GRIN1,GRIN2A,GUCY1A1,GUCY1B1,HAMP,HTR3A,ID1,ID3,IER2,IER3,ITGA1,ITGA2,JUN,JUNB,KIF…	2745 (25)
HS6ST1	-1.598	enzyme		1.816	2.24872	0.00564	CXCL8,FGF2,FGF8,IL6,SPRY2,VEGFA	1524 (19)
eflornithine		chemical drug		1.815	2.84164	0.00144	AKT1,APP,C3,CCNE2,CDK1,CDKN1A,CDKN2B,DHFR,FN1,IFNG,IL32,ITGAX,ITGB3,LGALS3,LGALS3BP,MAD2L1,ORC1,PLK1,RB1,SERPINE1,SLC3A2,TGM2	2623 (23)
MVP	1.683	other		1.811	5.57675	2.65e-06	CD1A,CD83,CD86,CXCL2,CXCL3,CXCL8,FOS,ICAM1,IL1B,IL6,IRF7,JUN,MITF,NFATC1,SPI1,TNF	2333 (22)
TNFRSF11A	-1.047	transmembrane receptor		1.811	2.56067	0.00275	AKAP13,BCL2L1,CCL19,CD40,CXCL13,FN1,POU5F1,SNAI1,SOX2,SRC,TFAP2A,VCAM1	1293 (15)
LTA	-1.442	cytokine		1.81	4.17328	6.71e-05	CCL19,CCL20,CD274,CD40,CD44,CD80,CHST4,COL2A1,CXCL13,EGFR,ERBB2,FOXP3,IFNG,IL10,IL17A,IL1B,IL4,IL6,ITGA5,ITGB1,ITGB3,JAK2,LTA,NFKB2,PDCD1LG2,REL,SELL,TNFRSF11B,VCAM1	1641 (14)
GATA6	1.08	transcription regulator		1.81	1.73993	0.0182	ABCB1,ACO1,ACTA2,ASPA,ATP6V0A1,BMP4,BMPR2,BRAF,C1R,C4A/C4B,CALML4,CAV1,CD5L,CDCA8,CDKN1A,CNFN,CRYL1,CXCL13,CYP17A1,CYP19A1,DCBLD2,DDX4,DLST,DMRT1,DPP4,DSCC1,EDN1,EPO,ESPL1,FGF2,FKBP14,GATA4,GRHL3,HES1,HNF1B,IL10,IL1B,IRF6,IRF8,KLF2,LAMA1,LAMB2,LORICRIN,LRRFIP1,MEF2C,MYH11,MYH6,MYH7,MYLK,NOS3,NUSAP1,PDGFRA,PECAM1,PGM2,POU5F1,PPARG,PPL,PPP1R14A,PRDM1,PTGES,PTGS1,SCD,SFTPA1,SOX2,STAR,STARD13,TBX3,TN…
prostaglandin J2		chemical - endogenous mammalian		1.81	0.436519	0.366	CCND1,CDKN1A,CSF2,CXCL8,GDF15,IL6,MYH11,PRL,TG,TNF
trichostatin A		chemical drug		1.809	32.0899	8.13e-33	ABCA1,ABCB1,ABCB10,ABCB6,ABCC3,ABCC4,ABCC5,ADCY1,ADGRL2,AGRN,AHR,AKAP12,AKR1B1,ALDH7A1,AMOT,APOE,APP,AR,ARFIP2,ATAD2,ATP7A,AURKB,AVIL,B2M,BBC3,BCL11A,BCL2,BCL2A1,BCL2L1,BCL2L11,BDNF,BIK,BLVRA,BLVRB,BMP4,BRCA1,BTG1,C1QTNF6,C8orf44-SGK3/SGK3,CAMSAP3,CBFA2T2,CBR1,CCL2,CCL20,CCL3,CCNA2,CCNB2,CCND1,CCND2,CCR3,CCR7,CD1D,CD28,CD34,CD36,CD44,CD58,CD86,CD9,CDC123,CDC25C,CDCA7,CDH2,CDK1,CDK5R1,CDK6,CDKN1A,…	2440 (18)
Akt		group		1.807	16.1367	7.3e-17	A2M,ACP2,ACTA2,ADD1,ADM,AIMP2,AMOT,APP,AQP3,AR,B3GALT6,BBC3,BCL2,BCL2A1,BCL2L1,BCL2L11,BCL6,BIRC2,BIRC5,BMF,BRCA1,BTG2,CCL2,CCND1,CCND2,CCR7,CD274,CD33,CD36,CD44,CDH2,CDK1,CDKN1A,CDKN1C,CEBPB,CELSR2,CHST3,COL2A1,CSF2,CTSD,CXCL10,CXCL12,CXCL8,CXCR4,CYP19A1,DLL4,E2F2,EFNB3,EGFR,EGR2,ELK1,EPO,ERAP1,ERBB3,EXT1,FBXO32,FN1,FOS,FOSL1,FOXM1,FOXO1,FOXP3,FUT11,GALNT10,GALNT11,GALNT18,GCK,GCNT4,GLI1,GNPTAB,…	1875 (17)
ITGA5	6.824	transmembrane receptor		1.807	3.23958	0.000576	APOE,BCL2,CCND1,CD40,CD44,CDH2,CDKN1A,CEBPB,COL2A1,ENPP2,ERBB2,FOS,HOXB9,IGFBP2,IL12A,IL12B,IL1B,IL6,JUN,JUNB,PLAU,PLAUR,PXN,TNF	1313 (17)
TNFSF9	1.825	cytokine		1.806	4.31515	4.84e-05	BCL2L1,CCR7,CD4,CXCL8,FOXP3,ICAM1,IFNG,IL2RA,IL4,IL6,KLRD1,PTPRC,TNF,TNFRSF1A,VCAM1	1619 (15)
TGAL copolymer		biologic drug		1.806	2.70115	0.00199	BDNF,CXCL8,FOXP3,IFNG,IGF1,IL10,IL1B,IL1RN,IL4,P2RX7,TNF	1109 (13)
SERPINF1	1.368	other		1.803	3.13077	0.00074	ACTA2,AXIN2,BCL2,BCL2A1,BCL2L1,BDNF,CCND1,CD34,CEBPA,CSPG4,CXCL8,G0S2,GDNF,IL10,LOXL2,LRP6,NEFH,NFKBIA,PDGFRA,PPARG,RLBP1,SERPINF1,THBS1,TJP1,TNFRSF11B,TNFSF10,VIM	1885 (17)
REL	1.377	transcription regulator		1.802	14.4855	3.27e-15	ACSS2,AGPS,AHR,ANLN,APLF,APP,ARFGAP3,ARHGEF11,ATP11A,B2M,BACH2,BARD1,BBC3,BCL2,BCL2A1,BCL2L1,BCL3,BIRC5,BRCA1,C1QTNF12,CACNA1E,CAMK2D,CCL2,CCL20,CCL4,CCL4L1/CCL4L2,CCND1,CCND2,CCR8,CD200,CD40,CD80,CD86,CDKN1A,CIITA,CILK1,COTL1,CR2,CREM,CSF2,CXCL10,CXCL3,CXCL8,DDX11,DHFR,DUT,E2F3,EDARADD,EGR2,ENDOG,EPHB2,ETV5,EVI5,FCER2,FN1,FOS,FOSL1,FOXP3,FRMD4B,GADD45B,H2AJ,HBEGF,HLA-A,ICAM1,ICOSLG/LOC102723996,…	2057 (16)
Hmgb1		transcription regulator		1.802	3.76195	0.000173	BCL2,CCND1,CDKN1A,CHGA,CHGB,CXCL8,IL10,IL1B,IL6,SCG2,TNF,TUBB3	1851 (18)
Wnt		group		1.801	2.05257	0.00886	CD24,CD34,CD44,CDH15,CDH2,CEBPA,EGFR,GATA3,GATA4,GLI1,ID2,LEF1,MSX1,PITX2,PPARG,RUNX2,SNAI1,SOX9,TFAP2A,TNFSF11	1851 (22)
catecholamine		chemical - other		1.8	1.7167	0.0192	CYP1A1,ERBB2,IL10,IL4,IL6,MUC4,TNF
IL2RA	3.075	transmembrane receptor		1.8	1.50585	0.0312	CCND2,CD86,FOS,IFNG,IL10,IL15RA,IL4,JUN,MGAT1,PTHLH,TNF
pentylenetetrazol		chemical drug		1.8	1.16368	0.0686	FOS,GABRB2,IL1B,JUN,SYN1,TIMP1
sphingosine-1-phosphate		chemical - endogenous mammalian		1.798	7.30452	4.96e-08	ACER2,ACTA2,AHR,ALPP,ANXA2,CCL2,CCND1,CCR3,CD276,CD36,CD44,CD83,CLGN,CSF2RB,CXCL10,CXCL2,CXCL8,DLGAP3,EGFR,EGR1,ENPP2,EPHB1,ERN1,ETS1,FAM167A,FGF2,FN1,FOS,GAP43,GBP5,HSD11B1,ICAM1,ID2,IFNG,IGF1,IL27,IL4,IL6,IRF6,JUN,MEOX1,NOS3,NOTCH3,NRP2,NUP210,PCSK6,PDGFA,PDGFB,PIEZO2,POLG2,POMC,RASGEF1A,RPS6KA5,RUNX2,S1PR1,S1PR2,S1PR4,SERPINE1,SORCS2,SPHK1,STAR,THBS1,TIMP1,TNF,TNFRSF11B,TNFSF11,VCAM1,VIM,VWF,W…	1834 (16)
MAP2K1/2		group		1.797	7.49894	3.17e-08	ATF3,BCL2L11,BDNF,C3,CCL3L3,CCL4,CCND1,CCND2,CDK1,CHI3L1,CXCL3,DDIT3,DUSP1,EGR1,EGR2,FOS,FOSL1,FOXP3,FURIN,GCLC,H2AX,HERPUD1,HSPA5,IL10,IL13,IL1B,IL2RA,IL4,JAG1,JAK1,JUN,let-7,MCL1,mir-221,mir-25,mir-26,MIR155HG,PDGFA,PIK3CG,PPARA,PRKCI,TNF,VEGFA,VIM	1601 (19)
WNT1	-1.555	cytokine		1.794	2.8962	0.00127	ACTA2,AXIN2,BIRC5,BMP4,CCDC80,CCNB1,CCND1,CCND2,CCNG1,CD24,CDKN1A,CEBPA,DDIT4L,DHFR,DLL4,DNAJC1,EDN1,EFNB1,EGR1,EIF4E,EIF4EBP1,ENPP2,ETS2,ETV4,FGF8,FN1,FOS,FZD2,GRN,HES1,HES5,IGF1,ISLR,JUN,JUNB,KRT5,LBH,LEF1,MRAS,NEUROG2,NOTCH3,NOTCH4,PITX2,PPARG,RARG,RHOU,RUNX2,SERPINE1,SERPINE2,SNAI1,STRA6,TJP1,TLE1	2316 (21)
Aldose Reductase		group		1.79	3.8962	0.000127	BCL2L1,CCND1,CCNE1,CSF2,CXCL8,E2F1,ICAM1,IL10,IL13,IL1B,IL4,IL6,ITGAM,TNF	1423 (15)
KNG1	3.36	other		1.79	2.44612	0.00358	APP,ASIC3,CALR,CCND1,COL1A1,CXCL8,EGFR,FGF2,FOS,IGF1,IL1B,IL6,KLKB1,NOS3,PTGS1,TNFSF11	1812 (19)
NEUROD1	-2.668	transcription regulator		1.787	0.385103	0.412	CDK5R1,CDKN1A,CHGA,GCK,MGAT5B,NEUROG3,NTRK2,PAX6,PCSK1,PDE6B,POMC,RANGAP1,RCVRN,SCG5,SCNN1B,SCT,SYP
KLK5	-1.023	peptidase		1.786	3.76195	0.000173	CCL20,CXCL2,ICAM1,IL17A,IL18,IL1B,IL23A,IL4,IL6,S100A9,TNF,TSLP	1150 (18)
gamma-secretase inhibitor compound E		chemical reagent		1.786	1.14086	0.0723	APP,CENPA,CXCL10,HES1,HEY1,HSPA8,IL6,PTPRK,RHOU,STIP1,TNF,TUBB3
SR1078		chemical reagent		1.785	2.72354	0.00189	DDIT3,DNAJB9,EDEM1,HSPA5,IL6,PADI2,TNF	1247 (9)
KDR	4.617	kinase		1.784	2.69037	0.00204	A2M,ANGPT2,ANXA2,CD38,CREBBP,CXCR4,DLL4,HAMP,HAVCR2,INPP5D,LAG3,MESD,NDC80,NME1,NOTCH1,PDCD1,S1PR2,SFRP1,SOX18,TJP1,VEGFA,XBP1	1943 (18)
dichlorovinylcysteine		chemical toxicant		1.784	0.935542	0.116	ACAT1,CCND1,CDK6,EGFR,HAAO,HBEGF,IL6,SLC27A2,SORD,STIP1,TUFM
MC2580		chemical reagent		1.782	2.72354	0.00189	ICAM1,ICAM4,IFI16,IRF8,ITGA7,ITGAM,LY86	1176 (7)
DMP1	-1.893	other		1.781	0	1	BZW2,CORO2B,CX3CR1,CXCL8,EPCAM,F13A1,IL6,LIPG,RUNX2,SLC6A9
EFNA1	4.393	other		1.78	3.56543	0.000272	ABCA12,ACHE,APOBEC3G,BACH2,CD69,DCBLD2,EPHA2,ETV5,FGF2,FN1,FOSL1,FOXI1,HERC6,IL2RA,IL4,IRF7,IVL,KRT18,NEDD4L,NT5E,PKP1,PLAT,PTHLH,PXN,SHB,SLC20A1,SOX9,TCF3,TRIM2,TRIM5,UBE2C,UBE2S	1438 (17)
STAP2	-1.252	other		1.78	2.56067	0.00275	CCND1,CCR1,CCR2,CCR7,CXCL2,CXCR2,CXCR3,CXCR4,EGFR,IL6,PTK2,TNF	1472 (16)
PTGER1	2.867	G-protein coupled receptor		1.778	3.69037	0.000204	ANGPTL4,CXCL8,EGR2,FN1,FOS,GDNF,ICAM1,IL10,IL6,POMC	1949 (19)
EPHX2	-1.06	enzyme		1.776	5.13608	7.31e-06	ACTA2,APP,BDNF,CCL2,DLL4,HES1,HEY1,HSPA5,ICAM1,IL1B,IL6,NOTCH1,RUNX2,SLC5A2,VCAM1,XBP1	1291 (17)
testosterone		chemical - endogenous mammalian		1.775	2.52724	0.00297	A2M,ABCC9,ACSL1,ADRB1,ANXA1,APLN,AR,ARRB2,ATF6,ATP1B1,BCL2,BCL2L1,BCL3,BDNF,BMP4,BMPR2,CAV1,CCND1,CCNE1,CDH2,CDK6,CDKN1A,CLU,CTSD,CYB5A,CYP19A1,CYP51A1,CYP7B1,DDIT3,DNMT3A,EGFR,EGR1,EIF4EBP1,EPO,ERBB2,ERBB3,ESR2,FBXO32,FGF8,FGFR1,FGFR3,FN1,FOS,FOSL1,FOSL2,FOXO1,GADD45A,GALR2,GNRH1,GUCY1A2,HPCAL4,HSD17B1,HSPA5,HSPD1,ID1,ID3,IFNG,IGF1,IGFBP5,IL10,IL1B,IL6,INSL3,IRS1,ITGB1,JAK2,JUN,KISS1R,KLK3,MAK,M…	2940 (24)
GRP	-1.023	growth factor		1.773	1.61439	0.0243	CCND1,CCNE1,CXCL8,ELK1,FOS,JUN,KLK3,PPY,PRKCA,PTK2,RRM2,TSLP,VEGFA
EIF4G2	-1.055	translation regulator		1.772	2.3363	0.00461	CCND2,CDKN1A,CTSD,JUN,KLF4,PLAT,POU5F1,SERPINE2,SOS1,SOX2,TBX3,TFCP2L1	811 (7)
RB1CC1	1.044	other		1.772	1.7167	0.0192	CCND1,CDKN1A,CDKN2B,CXCL10,RB1,SERPINE1,SMAD7
N1,N11-diethylnorspermine		chemical drug		1.77	0.643974	0.227	BIRC5,CCND1,CDKN1A,IFNG,SAT1,SMOX
hexamethylene bisacetamide		chemical reagent		1.767	2.96257	0.00109	BCL2,BCL2A1,CDKN1A,CREG1,CXCL8,EPOR,FN1,FUT8,HSPA8,IFIT3,IFNG,IL12A,IMP4,MAP2,mir-25,MYB,NPM1,RB1,SNRPB,SPI1,TFRC,TNF,WNT2B	1154 (9)
UNC93B1	1.122	other		1.765	1.88273	0.0131	CSF2,CXCL10,CXCL3,IFNG,IL12B,IL17A,IL1B,IL6,TLR7,TNF
SRSF3	-1.211	other		1.764	3.2644	0.000544	BCL2,CCND1,CCNE1,CD44,CXCL8,E2F1,FOXM1,HIPK2,JUN,VEGFA	1511 (11)
EPHB1	22.596	kinase		1.764	1.98716	0.0103	EGR1,EGR2,FOS,IL6ST,JUN,JUNB,SERPINE1
D-glucose		chemical - endogenous mammalian		1.762	13.8539	1.4e-14	ABCA1,ABCB1,ABCG1,ACE,ACHE,ACSL1,ACSS1,ACTA2,ACTG2,ACTN1,ACVR1C,ADA,ADARB1,AKR1B1,ALDOC,ANGPT2,ANLN,ANXA1,APLN,APP,ARF4,ASS1,ATF3,ATF5,ATF6,ATP2B4,ATP6AP2,ATP8B1,BBC3,BCL2,BCL2L1,BCL2L11,BCL7C,BMP4,C1QBP,C3,C8orf44-SGK3/SGK3,CACNA1B,CACNA1D,CALR,CASP1,CAV1,CBR3,CBS/LOC102724560,CCL2,CCL20,CCNB1,CCND1,CCND2,CCNE1,CCPG1,CD36,CD55,CDK1,CDK5R1,CDKN1A,CDT1,CEBPA,CEBPB,CETP,CLGN,CLU,CNN1,CNR1,COL1A1,CO…	2654 (22)
IL32	-2.003	cytokine		1.762	5.18376	6.55e-06	BBC3,BCL2,BCL2L1,CASP1,CCL2,CCL3,CCL4,CD36,CXCL3,CXCL8,DCSTAMP,EIF2AK2,ICAM1,IL10,IL12B,IL1A,IL1B,IL23A,IL32,IL6,ITGAM,MCL1,MX1,NFATC1,OSCAR,SPI1,THBD,TNF,TNFRSF11B,TNFSF11,VIM	1039 (13)
CCL20	10.138	cytokine		1.758	4.6216	2.39e-05	C3,CASP1,CCR2,CLEC7A,CX3CR1,GBP5,HAVCR2,HMGB2,IL1A,IL1B,IL1RN,ITGAM,LIPA,MYO5A,NCF1,NLRC4,NLRP3,OLR1,PIK3CG,PLD4,SLC7A2,TLR4,VIM,ZC3H12A	1184 (14)
nystatin		chemical drug		1.757	4.65561	2.21e-05	CCL3L3,CD40,CD80,CD86,CDH2,CXCL8,ICAM1,IL12B,IL1B,IL6,TIMP1,TNF	1003 (14)
lenalidomide		chemical drug		1.753	22.0487	8.94e-23	ACTG1,AFAP1-AS1,AGPS,ANOS1,AUTS2,BCL11B,BCL9L,BLNK,CARD16,CASP1,CAV1,CCL3,CCND1,CD226,CD38,CD68,CDKN2C,CEBPA,CEBPB,CEMIP2,CITED2,CNKSR2,DCC,DEPP1,DHTKD1,DNAJC25,DNAJC5B,DNM3,DOCK4,DOK4,DTNA,DVL1,ELF3,EPOR,ERN1,EXTL2,FANCI,FCHO2,FKBP11,FN1,FZD2,FZD4,FZD5,GABRB2,GALNT18,GIMAP2,GPR68,GZMB,HAUS7,HILPDA,HIPK2,HLA-DQA1,HLA-DRB1,HS3ST3B1,HSPA5,IFI27,IFI6,IFIH1,IFIT3,IFIT5,IFNG,IKZF1,INAFM2,IRF8,ITPR1,KC…	2070 (17)
NCOA1	1.938	transcription regulator		1.751	2.95078	0.00112	ABCA1,ABCB11,AGRN,AHR,BPGM,BTG2,C3,CCND1,CD24,CDKN1A,CEBPA,CEBPB,CELSR3,CYP17A1,CYP1A1,DBP,DDX28,DGKQ,EGR1,ELK1,EOMES,ERBB3,ERVFRD-1,FGF18,FGF2,FOS,FRAT2,GJB2,GYG1,HIC1,HSD11B1,IGF1,IL12B,IL1B,IL1RN,IL6,JUNB,KLK3,MAPK8IP2,NCOA2,NFIX,NFKBIA,NFKBIZ,OLR1,PAWR,PLCD1,POU2F1,PPARD,PPARG,PRL,PRLR,PTGES2,RB1,SERPINE1,SFTPA1,SORBS1,TLE1,TNF	1519 (20)
IL26	7.398	cytokine		1.751	2.72354	0.00189	CCL20,CXCL8,ICAM1,IL10,IL1B,IL6,TNF	1126 (14)
GRM5	1.66	G-protein coupled receptor		1.751	1.59176	0.0256	BCL2L1,FOS,GAD1,GPC4,THBS1,TNF
CTTN	1.625	other		1.746	2.31426	0.00485	CCR2,CXCL2,EGFR,IFNG,IL1B,IL6,TNF	1575 (18)
SPP1	1.475	cytokine		1.745	8.64589	2.26e-09	ABCG2,AKT1,AURKA,BCL2,BCL2L1,BCL2L11,BRCA1,CA2,CCL15,CCL2,CCL20,CCL3,CCL3L3,CCL4,CCND1,CCNE1,CCR2,CCS,CD44,CD9,CDC20,CDH2,CDKN1A,COL1A1,CXCL12,CXCL2,CXCL3,CXCL8,DHCR7,E2F1,EGFR,EPDR1,ERBB2,ETS2,FN1,FOS,GATA4,GSTZ1,HNF1B,HOMER2,ICAM1,IFNG,IGF1,IL10,IL12B,IL17A,IL1A,IL1B,IL6,INSIG1,ITGA2,ITGA3,ITGB3,ITGB5,JAG1,JUN,KRT18,LIF,LOX,MMP7,MYT1,MZF1,NOS3,NOTCH1,NRCAM,PDGFA,PIK3R1,PLAU,PLOD1,PPARG,RB1,RUNX…	2130 (19)
KDM4B	1.166	enzyme		1.745	1.50585	0.0312	ATG16L1,GAPDH,GLS,LOX,LOXL2,PDGFB,PDK1,PDK2,PDK3,PGM1,VIM
ITGA9	-1.166	other		1.744	2.3363	0.00461	ACTA2,CCL3L3,CCL4,CDH2,CXCL12,CXCL14,IL1B,IL6,MPO,SNAI1,TNFSF11,VIM	1708 (19)
bryostatin 1		chemical drug		1.742	4.82391	1.5e-05	APP,BIRC3,CCL3,CD22,CD40,CD44,CD80,CD86,CXCL8,CXCR4,E2F1,FOXP3,ICAM1,IFNG,IL1B,IL6,PRKCA,PRKCB,TBX21,TNF,TRAF1	1395 (14)
SERPINA1	1.417	other		1.742	3.40782	0.000391	ANGPTL4,ATF6,CCL2,CD36,COL2A1,CR2,CX3CR1,CXCL8,DDIT3,FCER2,HAMP,HSP90B1,HSPA5,IL10,IL1A,IL1RN,IL6,MCL1,PDIA3,RGS16,TLR2,TLR4,TNF,XBP1	1586 (15)
PDK1	1.732	kinase		1.742	3.06399	0.000863	ARSA,CCNA2,CCNB1,CCNB2,CD38,CDC20,CDC25C,CDK1,CXCR5,FOXO1,HDAC9,ID3,IFNG,IL4,ITGB8,ITK,LCK,MAP3K14,NRN1,P2RX7,PAK1,PIK3R1,PLK1,PRKCZ,SGPP2,SLC44A2,SSH2,SUMF1,SYNE1,VIM	2257 (21)
TCF/LEF		group		1.742	2.13371	0.00735	BIRC5,CCND1,FN1,IL1B,IL6,ITGB1,JUN,MITF,RUNX2,S100A4,SERPINE1,VIM
PIMREG	-1.079	other		1.741	2.73993	0.00182	IL10,IL17A,IL4R,IL6,SOCS3,TNF	1554 (13)
SMAD4	1.053	transcription regulator		1.739	14.8827	1.31e-15	ABCG2,ACKR1,ACVR1,ACVR1C,AIM2,ANGPT2,ANGPTL4,BBC3,BDNF,BMP4,CBFB,CCL1,CCL2,CCL20,CCL22,CCND1,CCND2,CCNE1,CCNG2,CDC42EP3,CDH2,CDK17,CDKN1A,CDKN2B,CITED2,COCH,COL2A1,COL7A1,CSF1,CTSD,CXCL2,CXCL3,CYB561,CYP17A1,CYP19A1,DOCK4,EDN1,EGFR,EIF4EBP1,ENG,EPB41L5,ERBB2,EREG,FGFR3,FN1,FOS,FOSL1,FOXP3,FSCN1,FSTL3,FURIN,FUT7,GADD45A,GADD45B,GCNT1,GDNF,GLI1,HAMP,HEBP1,HHEX,HMCN1,HMGA2,HRH2,ICAM1,ID1,ID2,IER3,IF…	2335 (21)
TWIST1	3.666	transcription regulator		1.738	8.51145	3.08e-09	ACTA2,ALCAM,AOPEP,APOD,AR,ASPM,AXL,BCL2,BCL2L11,C3,CBX2,CCL2,CD40,CD44,CDH2,CDKN1A,CHAD,CHI3L1,CLU,COL1A1,COL2A1,COL6A1,CXCL12,CXCL8,DDR2,DNM1,EFNB2,EGFL6,EPCAM,ETS1,FCGBP,FGFR3,FN1,FOS,FOSL1,FOXO1,FREM2,GLI1,IGFBP4,IGFBP5,IL10,IL1B,IL6,ITGB3,ITGB5,LALBA,LGALS3,LMNA,LRG1,MFGE8,MRC2,NT5E,OSGIN1,PAM,PCDH18,PDGFRA,PDZD2,PRKD1,PRL,PTPRU,PXDN,RHOC,RUNX2,S100A4,SEMA5A,SLC28A3,SLC29A1,SNAI1,SOX2,SPHK1,S…	2138 (24)
IL23A	-1.609	cytokine		1.734	3.9431	0.000114	AHR,CSF2,CXCL10,CXCL13,ICOS,IFNG,IL10,IL13,IL17A,IL18R1,IL1B,IL23R,IL6,IRF8,mir-223,NFATC1,S100A9,STAT1,STAT3,TBX21,TNF,XCL1	1237 (14)
HYAL1	1.186	enzyme		1.732	4.63264	2.33e-05	ARRDC4,ATP2B4,BMPR2,C1orf54,CARD16,CASP1,CCNB1,CDC25C,CDK1,CORO1C,EPHB2,IGFBP4,ITGA7,LGALS3BP,LOX,MAP1B,MFGE8,NLRP1,RUNX2,SCG5,SEL1L3,SLC35G2,SMARCA4,SOX9,SRPX,STXBP6,TBX3,TNFRSF10C
triamterene		chemical drug		1.732	3.31158	0.000488	A2M,ANXA1,ANXA2,BIRC3,C4A/C4B,CD44,CDCP1,CLU,EFEMP2,ELF3,FBLIM1,FCGR2A,GCGR,GPNMB,GSTM3,IER3,IL6,LAMC2,LGALS3,MCM3,PLA1A,RBM3,RCN1,S100A10,S100A11,STING1,TIMP1,TMSB10/TMSB4X,TNFRSF12A,UPP1,VIM
B4GALT6	1.203	enzyme		1.732	1.59176	0.0256	CCL2,CSF2,IL1B,IL6,TLR2,TNF
CCR6	-1.223	G-protein coupled receptor		1.732	1.56703	0.0271	CCL20,CCL3L3,CXCL10,HAMP,IFNG,IL10,IL12A,IL12B,TNF
C6	5.46	other		1.732	1.35754	0.0439	CCL3L3,CXCL2,CXCL3,IL13,IL1B,TNF
prostaglandin E2		chemical - endogenous mammalian		1.731	29.5607	2.75e-30	ABCG1,ACTA2,ADAMTS4,ADORA2B,AHR,AIF1,ANGPT2,ANGPTL4,ANXA2,APP,AQP3,ARHGEF3,ATF3,BCL2,BCL2L1,BCL2L11,BIRC3,BIRC5,BTG1,C5AR1,CALCRL,CALHM6,CALR,CASP1,CASP14,CASP4,CASP6,CCL2,CCL20,CCL22,CCL3,CCL3L3,CCL4,CCNB1,CCND1,CCR1,CCR5,CCR7,CCR8,CD226,CD274,CD40,CD44,CD55,CD69,CD80,CD83,CD86,CDKN1A,CEBPB,CEBPD,CHGA,CIITA,CLEC12A,CLEC7A,COL1A1,CREM,CSF1,CSF3,CXCL10,CXCL12,CXCL3,CXCL8,CXCR3,CXCR4,CYP19A1,CYTH1,…	2235 (18)
paclitaxel		chemical drug		1.727	17.9318	1.17e-18	ABCA2,ABCB1,ABCB10,ABCG2,ACKR3,ACTA2,ADM,ADORA2B,ALDH1L1,ANXA5,APOM,AR,ATF3,AURKA,BCL2,BCL2L1,BCL2L11,BHLHE41,BIRC3,BIRC5,BTG2,CASP10,CAV1,CCL2,CCND1,CCNG1,CCNG2,CD274,CD40,CD44,CD80,CD86,CDA,CDC20,CDC42EP3,CDKN1A,CELSR2,CHAF1B,CLU,CRY2,CSF2,CXCL10,CXCL2,CXCL8,CYP19A1,CYP1A1,CYP1B1,DCHS1,DDIT3,DEPDC5,DHRS2,DNMT1,DUSP10,DUSP5,DVL1,E2F1,EEF1E1,EGFR,EGR1,ELL,ENPP2,ENPP4,EPHA2,EREG,ETV5,FAM53B,FOSL1,…	1447 (12)
OSCAR	2.158	other		1.726	8.82391	1.5e-09	BCL2,CCL20,CCR2,CD40,CD83,CD86,CX3CR1,CXCL2,CXCL3,CXCL8,FZD2,ICAM1,IL12B,IL1A,IL1R1,IL1RN,ITGAM,JAK2,MMP19,MMP7,RRAS,TLR7,TLR8,TNF,TNFSF10,TNFSF14	1638 (14)
CELF1	1.169	translation regulator		1.725	1.84164	0.0144	CCNB1,CDKN1A,CEBPB,FHL2,HDAC1,ICOS,RCAN1,TNFRSF4
entolimod		biologic drug		1.723	8.96658	1.08e-09	ADRB2,ATF3,BCL2A1,CCL4,CXCL10,CXCL2,CXCL3,DUSP1,GDF15,IER3,IL10,IL1A,IL1B,IL6,IRF1,JUNB,NFKBIA,NFKBID,NFKBIZ,RCAN1,TNF,TNFAIP2,TNFAIP3	820 (11)
U1 snRNP		complex		1.722	2.24872	0.00564	CCL3,CCL4,IFNG,LY9,SLAMF7,TNF
AcPhe(ornithine-Pro-cyclohexylamine-Trp-Arg)		chemical reagent		1.722	1.78781	0.0163	IL17A,IL1B,IL23A,IL6,TNF
PPP1CA	-1.234	phosphatase		1.72	1.88273	0.0131	AR,CDH2,FOS,IL10,RUNX2,WWTR1
muromonab-CD3		biologic drug		1.719	4.16941	6.77e-05	CD69,FOXP3,GZMB,ICOS,IFNG,IL13,IL17A,IL2RA,TBX21,TFRC,TNF	1268 (19)
PCYT1A	1.273	enzyme		1.719	2.25806	0.00552	ABCA1,AXL,CXCL2,FGFR1,FRK,KLF4,MAPKAPK2,PCYT1B,SCD,SEPTIN3,SIX4,STX3,TUBB3	946 (10)
ST14	4.081	peptidase		1.718	3.2644	0.000544	CD24,CSF2,CXCL2,CXCL8,ICAM1,IFNG,IL1B,TMEFF1,TNF,TSLP	1145 (13)
anti-benzo(a)pyrene-diol-epoxide		chemical toxicant		1.715	3.2644	0.000544	BCL2L11,BNIP3,BRCA1,CCND1,CDC25B,CDKN1A,GADD45B,IL6,JUN,TNF	1931 (18)
SOCS2	1.997	other		1.713	4.38722	4.1e-05	CCL4,CD40,CD83,CD86,CXCL10,CXCL9,GHR,IFNG,IGF1,IL1B,IL6,LIPE,MYH7,PPARG,STAT3,TNF	1092 (15)
IGF2	4.231	growth factor		1.71	4.74232	1.81e-05	AKT1,ARHGDIA,ARL4A,BIRC5,CASP6,CCND1,CCNG2,CD36,CDK1,CDKN1A,CORO2B,CXCR4,CYP1B1,DDIT3,DHCR7,DLX1,DUSP1,EGR1,EGR2,ELOVL6,EREG,FN1,GADD45A,GCH1,GHR,GRN,HBEGF,IDH1,IER2,IER3,IFITM2,IGF1,IGF2R,IGFBP2,IGFBP4,IGFBP5,IL10,IL6,ITGA5,ITGB5,JUNB,KIFAP3,KLF9,MCM2,MCM5,MCM7,MDM2,MXI1,NFKBIA,PDGFB,PIK3R1,PRIM1,RGS16,RHOB,RNF103,RRM2,SAT1,SATB1,SELENOP,SERPINE1,SKAP2,SLC20A1,SOCS3,THBS2,THRA,TRAIP,UHRF1,ULK2,V…	2180 (24)
NOS2	1.75	enzyme		1.71	4.56225	2.74e-05	ACO1,APP,AR,BCL2,BCL2A1,BIRC5,BNIP3,CCL2,CCL3L3,CCL4,CD44,CD80,CD86,CDKN1A,CHI3L1,CSF3R,CXCL2,CXCL3,CXCL8,DLG4,EDN1,FOXO1,FOXP3,GDNF,GPD1,GPT,HMGB2,IFIT3,IFNG,IL10,IL12B,IL17A,IL1B,IL1RN,IL32,IL6,IRAK1,IRS1,ISG15,KLF6,LCK,LGALS3BP,LILRB4,LORICRIN,LPAR1,MB,MCM5,MYH6,MYH7,NFKBIA,NKX2-5,NOS3,PC,PERP,PIGR,PLSCR1,PRDX6,PRL,PTGS1,SERPINH1,SLFN12L,SPR,STXBP1,SYP,THY1,TIMP1,TLR4,TNF,TNFSF10,TNFSF13B,TNK2…	1490 (14)
SFRP5	-1.023	transmembrane receptor		1.71	1.98716	0.0103	CCL2,CXCL8,CXCR4,IL1B,IL6,TCF4,TNF
sphingosylphosphocholine		chemical - endogenous mammalian		1.71	1.88273	0.0131	CCL2,FOS,ICAM1,JUN,PRL,TGM2
PML	1.175	transcription regulator		1.709	8.6216	2.39e-09	ACACB,ACSM1,ACTG1,ANXA4,APOE,BIRC5,BRCA1,BST2,CACYBP,CCND1,CCNE1,CDH2,CDKN1A,CDKN2B,CFL1,CIAPIN1,CIITA,CIT,CPE,CPT1B,CXCR4,DDX60,DNAJA4,DNAJB4,DNAJB6,DNAJB9,DNAJC9,EGFR,ELOVL6,EPSTI1,GADD45A,GCLM,HERC6,HSD17B7,ID2,IFI27,IFI35,IFI44,IFI44L,IFIH1,IFIT1,IFIT3,IFITM1,IL1A,IL1B,IRF7,ISG15,ISG20,JUP,LIPE,MAPK11,MCM6,ME1,MX1,NQO1,NR3C1,OAS1,OAS2,OAS3,PIK3C2A,PLSCR1,PRDX1,PRKCA,PRKCH,RRAS2,SCD,SNAI1,SQST…	2050 (22)
TPH1	1.145	enzyme		1.709	5.68403	2.07e-06	AEN,ARRDC3,ASF1B,CCR5,CDCA8,DLGAP5,EPCAM,ERMN,FAM3C,FCMR,GALNT18,GIMAP4,GIMAP7,GNPDA1,GPR171,HSPA8,ICOS,IFI16,IL17A,IL1R2,IRAK3,JUN,KMO,LDLRAD4,LGMN,MUC20,NCAPG,NMRK1,PCLAF,PPIC,PRICKLE1,RACGAP1,RLN3,RRM2,SLAMF6,ST6GALNAC2,STAT4,SUSD3,TG,TIGIT,TRIM5,TRIM6-TRIM34	1006 (7)
S100A7	-8.877	other		1.706	1.56703	0.0271	CCL20,CCL3,CCL4,CSF2,CXCL8,IL1A,IL6,TNF,VEGFA
Tlr13		other		1.706	1.35754	0.0439	CXCL3,CXCL8,IL12B,IL1B,IL6,TNF
zymosan		chemical - endogenous non-mammalian		1.705	5.22621	5.94e-06	CCL22,CCL3L3,CCL4,CCR7,CD40,CD86,CIITA,CPT1B,CR1,CSF1,CSF2,CSF3,CXCL10,CXCL12,CXCL2,CXCL3,CXCL8,DEPP1,IKBKE,IL10,IL12B,IL17A,IL1A,IL1B,IL23A,IL36A,IL4R,IL6,ITGAM,LGALS9,LIF,PLA2G6,PPARA,PTGS1,SLC27A1,SOCS1,SOCS3,SPN,THRA,TLR2,TNF	1151 (15)
ANGPT1	-1.023	growth factor		1.705	3.46597	0.000342	ADAMTS4,ALCAM,ANGPT2,APLN,BCL2,BCL2L1,BIRC5,CCL2,CCND1,DLL4,DUSP1,DUSP5,EFNB2,HOXB4,ICAM1,IL1R1,ITGB1,JAG1,MYH7,NOS3,TNF,VCAM1,VEGFA	1192 (17)
SMARCA2	-1.351	transcription regulator		1.704	3.67985	0.000209	BCL2,CCNE1,CD36,CD44,CDKN1C,CIITA,COL7A1,CXCL13,DHFR,E2F1,EPO,HES1,HES5,HOXA9,IFNG,IGFBP5,IL6,ITGAM,KLK3,LAMC2,MEF2C,MSX1,MYLK,MYT1L,NME1,PMEL,PPARG,RAB27A,RBL1,RRM2,TBX21,TUFT1,VDR	2058 (23)
CLEC4E	-1.187	other		1.702	3.14448	0.000717	CCL3L3,CCL4,CSF1,CXCL2,CXCL3,DCSTAMP,IL10,IL12B,IL17A,IL1B,IL23A,IL6,NLRP3,SCD,TNF	1105 (17)
CD2	-1.711	transmembrane receptor		1.701	4.97062	1.07e-05	BCL2,CCNA2,CCNB1,CCND1,CCR7,CD4,CD40,CD44,CD58,CD80,CD86,CSF2,CXCL8,ICAM1,IFNG,IL10,IL13,IL4,PTPRC,RAG1,RB1,SELL,STAT1,STAT4,TNF	1372 (18)
15-E2-isoketal modified phosphatidylethanolamine		chemical reagent		1.698	2.73993	0.00182	CCL2,CXCL8,DDIT3,HSPA5,ICAM1,VCAM1	813 (7)
SW016789		chemical reagent		1.698	1.88273	0.0131	ATF3,DDIT3,DUSP1,HSPA5,NPAS4,XBP1
inosine		chemical - endogenous mammalian		1.696	4.63264	2.33e-05	A2M,AIF1,ALCAM,ANTXR2,ANXA1,ANXA2,ANXA5,C1S,C3,C4A/C4B,CCL3L3,CD68,CXCL13,DPP4,EIF4EBP1,GAP43,IFITM3,IFNG,IRF1,L1CAM,LGALS3BP,NPC2,RHOC,SERPING1,TIMP1,TNF,TSPO,VIM	672 (7)
MAPT	-1.318	other		1.694	12.1952	6.38e-13	A2M,ABCG1,ABCG2,ACAT1,ACTG1,ACTN1,ADD1,AIF1,ALDH5A1,ANXA5,AP3B2,APP,ARF4,ARL11,ATF3,ATP1A3,ATP1B1,ATP6V1A,B4GALT1,BCL3,BCR,BDNF,BSN,C1QBP,C1R,C1S,C3,C4A/C4B,CAMK2D,CAPG,CAPN2,CCL2,CCL3L3,CCL4,CCNB1,CCND1,CCT7,CD22,CD274,CD44,CD9,CDK5R1,CDKN1A,CEBPB,CFL1,CKB,CKMT1A/CKMT1B,CLASP2,CLEC7A,CLTB,COL4A4,CORO1A,CRYM,CTSD,CTSS,CXCL10,CXCL13,CXCL2,CXXC1,DDX60,DLG4,DNAI3,DNAJC6,DPYSL2,EIF5A2,ELF4,ELOVL7,EPS…	2014 (19)
phorbol 12,13-dibutyrate		chemical - endogenous non-mammalian		1.693	4.92082	1.2e-05	APP,BCL2L1,CCND2,CCNG2,CD55,CD93,CDKN1A,CSF2,CXCL8,FOS,ITGA2,MDM2,PRKCA,PRKCB,PRKCE,PRNP,PTAFR,RRM2,SERPINE1,SPRY2,SPRY4,TNF	2000 (18)
MEF2C	-1.434	transcription regulator		1.692	2.46344	0.00344	ATF3,BACH2,BDNF,BLK,CALR,CCL2,CCL3L3,CCL4,CCR2,CCR5,CDKN1A,CKB,COL1A1,COL2A1,CPT1B,CXCL2,CXCR4,EGR2,FOS,GATA4,GNRH1,HDAC9,IKZF1,IL6,JUN,JUNB,KCNA5,KCNJ2,KLF2,LOC102724428/SIK1,MEF2C,MMP25,MYH6,MYH7,MYL4,MYLPF,MYOZ1,PDLIM3,PHKA1,PPARA,PTGS1,RUNX2,S100A4,SLC8A1,TNNC1,TNNI1,TNNI2,TTN,VIM,ZFP36	2162 (25)
Pkc(s)		group		1.684	9.37263	4.24e-10	ABCA1,ACAT1,ACO1,ACTA2,ADM,AHR,APLN,APP,AQP3,ARNT,ATF2,ATF3,ATF6,BCL11B,BCL2,BCL2L1,BCL2L11,BDNF,BIK,CCL2,CCR2,CCR5,CD36,CD4,CD55,CDKN1A,CNN1,COL1A1,CTSB,CXCL8,CXCR4,CYP19A1,CYP1A1,DBP,DDIT3,DMD,DNAJC3,DUSP1,EDN1,EGFR,EGR1,EGR2,ERN1,FGF2,FN1,FOS,FOSL1,GADD45A,GADD45B,GAP43,GNRH1,GPER1,GRHL3,HOXA7,HSP90B1,HSPA5,ID2,IL10,IL12B,IL1B,IL6,IRF6,IRS1,ITGA5,ITGB1,IVL,JUN,JUNB,KCNJ2,KLF6,KRT8,LIPA,LORICRI…	1868 (19)
CP-55940		chemical reagent		1.682	5.68403	2.07e-06	ALDOC,AR,BCL2L1,BIK,BTG2,CCL2,CCL4,CCNE1,CSF1,CXCL8,DCC,ERBB2,GADD45A,GAPDH,GRK5,JUN,JUNB,MDM2,NFKBIA,PRKCB,TNF,TNFAIP3,UBC,YWHAZ	1367 (16)
PRKD1	10.704	kinase		1.68	2.15927	0.00693	BIRC5,BMPR2,CCL3L3,CCL4,CCND1,CCND2,CD86,CXCL10,CXCL2,CXCL3,ERN1,GATA4,IFNG,IL10,IL12B,IL13,IL1B,IL23A,IL2RA,IL6,LOXL3,MFN1,NKX2-5,TNF,TNFAIP3,TNFRSF11B,TNFSF11,VCAM1,XBP1	1376 (13)
CHD1	-1.398	enzyme		1.677	4.20412	6.25e-05	BCL2A1,CCL20,CSF2,CXCL2,CXCL3,ICAM1,IER3,IL1A,IL1B,IL6,KPNA2,LIF,TNF	448 (4)
Fgf		group		1.677	2.27819	0.00527	ACE,CCND1,FOS,IGF1,IL6,JUN,JUNB,LPCAT1,MITF,NKX2-5,PRL,RUNX2,SPRY2,SPRY4,STAT1,VCAM1	2083 (20)
RAS		group		1.674	7.22475	5.96e-08	AURKA,B4GALT1,BCL2,BCL2L1,BCL2L11,BNIP3,CAV1,CCL2,CCND1,CD274,CDKN1A,CDKN2B,CEBPA,CSF2,CSF3R,CXCL10,CXCL8,EDN1,EGR1,FN1,FOS,FOSL1,GBP2,GRIN1,HMGA1,IFNG,IGF1,IL1A,IL1B,IL24,IL4,IL6,IRF1,IVL,JUN,LIF,MITF,MUC4,MYH11,NPM1,PDGFA,PDGFB,PLAU,PLAUR,PLD1,PPARD,PRDM1,PRDX1,PRL,PTGES,PVR,SERPINE1,SERPINE2,SNAI1,STAT1,STAT2,TFPI2,TG,TGM2,TNF,UPP1,VEGFA,VIM,ZNF768	1178 (14)
HOXB5	1.008	transcription regulator		1.671	1.59176	0.0256	ANGPT2,HAMP,ITGB3,PLAU,PLAUR,RET
IL12B	96.92	cytokine		1.667	8.02595	9.42e-09	AICDA,CCR5,CD86,CDKN2D,CEBPD,CSF2,CXCL10,CXCL8,DUSP5,EOMES,ERN1,GZMB,ICAM1,IFNG,IL10,IL12A,IL12B,IL12RB1,IL17A,IL1A,IL1B,IL23A,IL4,IL6,INPP5D,IRF9,LTA,S100A9,SELPLG,SOCS1,SOCS3,STAT1,STAT2,STAT3,STAT4,TNF,VCAM1	1177 (14)
TYR	-5.339	enzyme		1.667	2.49485	0.0032	CCR1,CCR2,CSF2,CXCR2,CXCR3,CXCR4,IFNG,KLRC1,KLRD1	1192 (7)
BRD2	1.081	kinase		1.664	3.9393	0.000115	BCL2,CISH,CR2,DYNLT1,GNG3,IL1B,IL6,IL7R,LAMB3,LY9,NQO1,P4HB,PAWR,PKIB,PRELID1,PRKD3,RAB3GAP2,ROBO1,RPN1,S100A6,SATB1,SLC4A1,SOX5,STAT4,TNF,VAV3,WEE1	2182 (7)
ANKRD42	1.302	transcription regulator		1.664	2.73993	0.00182	CSF2,CSF3,CXCL3,IL1B,IL6,TNF	778 (7)
HTR7	1.034	G-protein coupled receptor		1.664	1.88273	0.0131	FOS,IL17A,IL1B,IL6,THBS1,TNF
Gm13288 (includes others)		cytokine		1.664	1.35754	0.0439	CD40,CD80,CD83,CD86,IRF1,TLR3
CTF1	-1.32	cytokine		1.661	3.82974	0.000148	A2M,CEBPD,ENPP2,FOS,GATA4,IL4R,IL6ST,IRF1,IRS1,JUNB,MYH11,MYH7,MYLK,NKX2-5,PNPLA2,POMC,PPARG,SOCS1,SOCS3,TIMP1,TNF	1518 (18)
titanium dioxide		chemical drug		1.66	1.36452	0.0432	ALOX5AP,CDKN1A,ERBB2,HCAR2,IFNG,IGF1,IGFBP2,IL13,IL1B,IL6,PLAT,TNF
TBX5	1.804	transcription regulator		1.659	1.9914	0.0102	CCL2,CCL20,CCL3L3,CCL4,COL1A1,CXCL2,CXCL8,CXCR4,GATA4,IFI16,IL6,IL7,KCNA5,KCNJ2,LOC102724428/SIK1,MEF2C,MYH6,MYL4,MYLPF,NFATC4,NKX2-5,PDLIM3,PHKA1,PTGS1,S100A4,SLC8A1,TNFSF4,TNFSF8,TNNC1,TTN,VIM
L-triiodothyronine		chemical - endogenous mammalian		1.657	4.23433	5.83e-05	A2M,ABCA1,ACHE,ACOT2,ACSL1,ACTG2,ADCY9,ADM,ADRB2,AGTRAP,ALPP,APOC2,APOM,APP,AR,ARHGAP26,ARSA,ASS1,ATP1A3,ATP1B1,ATP1B2,ATP8B4,BBC3,BCL2,BCL2L1,BCL2L11,BCL3,BDNF,BMF,BMP4,BNIP3L,BTG2,C1S,C4A/C4B,CASP6,CBR1,CCND1,CCNE1,CCT4,CD36,CD44,CDC42EP4,CDCA4,CDKN1A,CDKN2B,CEBPA,CHD1,CIAPIN1,CLU,CMKLR1,CNR1,CPT1B,CRYBB3,CTH,CXCL12,CXCL14,CYP17A1,CYP19A1,CYP27B1,CYP51A1,CYS1,DAAM2,DBP,DKK4,DNMT3A,DUSP1,DUSP5,D…	2059 (21)
TNFSF12	-1.355	cytokine		1.657	4.1986	6.33e-05	BCL2L1,BST1,CCL19,CCL2,CCL3,CCL3L3,CCND1,CCR1,CCR5,CD68,CSF2,CXCL10,CXCL2,CXCL3,CXCL8,CXCR5,FBXO32,HES6,HEY1,HEYL,ICAM1,IL17A,IL1B,IL1R2,IL6,ITGAM,JAG2,let-7,MAP3K14,MEF2B,MEF2C,mir-103,mir-27,NCF4,NFKB2,NFKBIA,NOS1,NOTCH1,NOTCH3,S100A9,SIX2,TIMP1,TNF,TNFRSF12A,TNFSF4,TSLP,VCAM1	1381 (11)
MAPK10	19.028	kinase		1.656	1.96658	0.0108	APP,BBC3,CD44,CXCL8,FOS,FOXO4,IL6,JUN,TNF
PTH	-1.023	other		1.654	4.84466	1.43e-05	AHNAK,ANK3,BCL2,CA2,CCL2,CCND1,CDKN1A,CEBPB,CGNL1,CLEC11A,COL1A1,COL2A1,CREM,CSF1,CXCL12,CXCL2,CXCR4,CYP27B1,DDIT3,DISC1,DUSP1,EFNB2,EGFR,EGR2,ESAM,FN1,FOS,FOSL2,FURIN,GALNT3,GNG12,GOLGB1,HSPA5,IGF1,IGFBP5,IL6,IL6R,JUN,LEF1,LMNA,LRBA,PALM,PDGFA,PLAU,PTHLH,PXN,RAMP3,RAP1GAP,RBM14,RGS1,RGS2,RUNX1,RUNX2,SDC4,SEC22B,SEC61B,SLC34A1,SLC43A2,SLC8A1,SMAD3,SMAD7,SOCS3,SORT1,SRC,ST14,TFPI2,THBS4,TMEM119,TN…	1760 (20)
CPE	7.195	peptidase		1.654	1.48413	0.0328	BCL2,CHGA,CHGB,DAP,DDIT3,EFNA1,IGFBP2,PAM,PCSK1N,PMCH,POMC,SCG2,SOX9
FSHR	-1.023	G-protein coupled receptor		1.651	1.5376	0.029	ACP3,APP,AR,CD55,CEBPB,CLDN11,CPE,CX3CL1,CYP19A1,DUSP1,ESPN,ESR2,GATA4,GZMB,LGMN,NPR3,PDGFA,PLA1A,PLAT,STAR,TJP1,VEGFA
imatinib		chemical drug		1.648	7.33068	4.67e-08	APP,ATF6,ATP1B1,ATP1B2,ATP6V1A,AURKA,BBC3,BCL2,BCL2L1,BCL2L11,BCL2L14,BCR,BIRC2,BIRC5,BLNK,BRCA1,CACNA1B,CALR,CASP10,CCNA2,CCNB1,CCND1,CCND2,CCNE1,CCNH,CD274,CDC7,CDKN1A,CDKN2C,CEBPA,CEBPB,CHD1,CHEK1,CITED2,CKS1B,COL1A1,COPB2,CSF2,CXCL10,CXCL12,CXCR4,DDIT3,DEDD2,DNAJB11,DNAJB6,ECT2,ESPL1,ETV5,FAIM,FN1,GADD45A,HAT1,HMGB1,HSP90B1,HSPA2,HSPA5,HSPA8,HSPE1,HYOU1,ID1,IDO1,IFIT2,IFIT3,IFNG,IL1B,IL6,IL7,…	2145 (21)
Calcineurin protein(s)		complex		1.648	3.4045	0.000394	BCL2,BCL2L11,BDNF,CAMK2D,CBLB,CCL1,CCL3,CCL4,CPT1B,CXCL3,CXCL8,DUSP1,EGR1,EGR2,FGF18,FOS,IL4,ITPR1,LIN7A,MB,mir-24,MYH7,MYO1A,NFATC4,PPARA,RCAN1,RGS2,RYR1,SERPINE1,SLC8A1,SLC8A2,STAT3,TNF	1584 (21)
Tgf beta		group		1.646	15.4168	3.83e-16	ABCA1,ABCD1,ACKR2,ACTA2,ADGRE5,AHR,AKT1S1,ANGPTL4,ANKH,ARHGAP45,ARID2,ARID3B,ARNT,ATP1B1,AXL,BAMBI,BCL2,BCL2L1,BHLHA15,BHLHE41,BLVRB,BNIP3,BST1,CASP1,CCL1,CCL2,CCL3,CCL3L3,CCL4,CCND1,CCND2,CCNE1,CCR2,CCR7,CD274,CD300LB,CD36,CD69,CDH2,CDK6,CDKN1A,CDKN2B,CEBPB,CHST11,CIITA,CLU,COL1A1,COL6A2,COL7A1,COQ8A,CSF1,CSF1R,CSF2,CSF3,CX3CR1,CXCL10,CXCL2,CXCL3,CXCL8,CXCR4,EDN1,EGR2,EID2,EID3,EMID1,ENG,FGF2,FN…	2327 (18)
PIM2	2.947	kinase		1.645	4.25337	5.58e-05	CCND1,CD38,CD44,CDKN1C,E2F1,FOXP3,IFNG,IL12RB2,IL2RA,SELL,SOCS1,STAT4,TBX21,TP73	1279 (18)
BAK1	-1.181	other		1.645	2.00043	0.00999	BCL2L11,CDKN1A,CXCL10,DNAJB2,DNAJB9,EDEM1,HLA-A,IFITM2,IL15,IL6,IRF7,JAK1,TNF,TRIM6-TRIM34,XBP1	1576 (21)
ELF4	-1.258	transcription regulator		1.643	1.71444	0.0193	ABCB1,CA2,CCR7,CDKN1A,CREM,CXCL2,CXCL8,DUSP1,DUSP5,KLF2,KLF4,MANF,MAPKAPK3,MDM2,RCAN1,SELL
NFYA	1.158	transcription regulator		1.642	5.45717	3.49e-06	ABCB1,BBC3,BCL2,BIK,CALR,CBS/LOC102724560,CCNA2,CCNB1,CCNB2,CDC25B,CDC25C,CDCA8,CDK1,CDKN1A,CHEK2,COL5A3,CYP1A1,E2F1,EGR1,F8,GADD45A,GADD45B,GUCY1B1,HLA-DQB1,HOXB4,HSD17B7,HSPA5,HSPA7,ICAM1,IGF1,IRF1,JUN,JUNB,LMAN1,NOTCH1,NPR1,PADI4,POU2F1,RHOB,RRM2,SCD,TOP2A,VWF	2248 (19)
HNF4A	1.905	transcription regulator		1.638	4.97062	1.07e-05	AASS,ABCA6,ABCB10,ABCB11,ABCB9,ABCC3,ABCG1,ABHD6,ACAD8,ACAT1,ACCS,ACO1,ACOT1,ACP2,ACP6,ACSL1,ACSS2,ACTA2,ACTN1,ACTR5,ACVR1,ADGRB2,ADPRHL1,ADRB2,ADSS2,AGPAT1,AHNAK,AHSA1,AIP,AKAP13,AKIRIN2,AKR1B1,AKR1C1/AKR1C2,ALCAM,ALDH1L1,ALDH5A1,ALDH8A1,ANG,ANKRA2,ANXA5,APOC2,APOE,APOM,APP,AQP3,AQP9,ARFGAP1,ARFIP2,ARHGAP11A,ARHGEF19,ARL1,ARL17A/ARL17B,ARL4C,AS3MT,ASAH1,ASB7,ATF2,ATP10A,ATP7A,ATP7B,AVPI1,AXIN2,B…	2449 (23)
LGALS9	1.696	other		1.637	3.03198	0.000929	CCR5,CDKN1A,CXCL8,CXCR4,HAVCR2,IFNG,IL10,IL13,IL17A,IL1B,IL4,IL6,SELL,TNF	1204 (17)
let-7	10.543	microRNA		1.633	15.1746	6.69e-16	ACTA2,ACVR1C,ADRB1,AGO2,ALDH1B1,ANKH,APP,AR,AURKA,AURKB,BCAP29,BCL11A,BCL2L1,BDNF,BOP1,BRCA1,BTG2,BUB1B,CBFB,CCNA2,CCNB1,CCND1,CCNE2,CCNF,CCNJ,CCR7,CD44,CDC20,CDC34,CDCA2,CDCA3,CDCA5,CDCA7,CDCA8,CDH2,CDK1,CDK6,CDT1,CEBPD,CHEK1,CKS1B,COL1A1,COL24A1,COL27A1,CPEB3,CXCL8,DLC1,DMD,DNAJB9,E2F2,E2F8,EDEM1,EIF4A1,ETV2,FGF5,FN1,FOSL1,GAB2,GALE,GMNN,GPX7,GZF1,HMGA1,HMGA2,ID2,IGF1,IGF2BP1,IL10,IL17A,IL1B,IL…	1662 (19)
PAK2	-1.194	kinase		1.633	5.68403	2.07e-06	ASS1,BMP4,CD69,CKB,DUSP1,ETS1,GADD45A,H2AX,H3C8,HBEGF,HMGA1,ID1,ID3,IFI16,IGF1,IGFBP5,LDLRAP1,MDM2,PLAUR,PRKCI,S100A6,SMAD7,SMARCA2,ZEB2	2108 (17)
5-fluoro-2-hydroxycinnamaldehyde		chemical reagent		1.633	3.47496	0.000335	BIRC5,CCNB1,CDC20,CDC25C,CDK1,MAD2L1
5-fluoro-2-benzoyloxycinnamaldehyde		chemical reagent		1.633	3.47496	0.000335	BIRC5,CCNB1,CDC20,CDC25C,CDK1,MAD2L1
1-palmitoyl-2-oleoylphosphatidyl-D-serine		chemical reagent		1.633	3.47496	0.000335	CSF2,CSF3,CXCL2,CXCL3,IL6,TNF
RC3H2	1.031	enzyme		1.633	2.31426	0.00485	ICOS,IFNG,IL17A,IL4,ITGAE,SDC1,TNFRSF4	1292 (9)
fingolimod phosphate		chemical - endogenous mammalian		1.633	2.24872	0.00564	CCL2,ERN1,IL6,SERPINE1,SPHK1,THBS1	1913 (20)
NEU3	1.093	enzyme		1.633	2.24872	0.00564	AR,BCL2,EGR1,MMP7,RAB25,ST3GAL5	1033 (7)
clioquinol		chemical drug		1.633	1.98716	0.0103	APP,CCND1,CDKN1A,FOS,HDAC1,JUN,KDM6B
RLIM	-1.235	enzyme		1.633	1.98716	0.0103	CDH2,CDKN1A,CDKN2B,FN1,SERPINE1,SMAD7,VIM
vidutolimod		chemical drug		1.633	1.88273	0.0131	CCL3,CCL4,IFNG,IL1R1,IL6,TNF
ivermectin		chemical drug		1.633	1.88273	0.0131	CCL2,CXCL2,CXCL8,IL1B,IL6,NLRP3
tin mesoporphyrin		chemical drug		1.633	1.59176	0.0256	CCL3L3,ICAM1,IL1B,IL6,SLC25A5,TNF
cortistatin A		chemical reagent		1.633	1.59176	0.0256	CEBPA,FOSL2,GFI1,IRF1,IRF8,JARID2
8,9-epoxyeicosatrienoic acid		chemical - endogenous mammalian		1.633	1.35754	0.0439	CD44,CD82,EGFR,NME1,PIK3CG,PLAT
cytidylyl-3'-5'-guanosine		chemical reagent		1.628	4.86967	1.35e-05	BCL2,BCL2L1,BCL2L11,CD86,IL1A,IL1B,IL6,PRDM1,TLR9,TNF	734 (7)
PDGFRB	4.348	kinase		1.628	3.71444	0.000193	ACTA2,EGFR,EPO,FN1,HAMP,MYH11,OSM,PDGFRB,RGS5,SMAD1,STAT3	1948 (24)
tert-butyl-hydroquinone		chemical reagent		1.627	6.03339	9.26e-07	AKR1C1/AKR1C2,ATF3,BCL2,BRF2,CNR1,CRYZ,CTCF,CYP1A1,DDAH2,DYRK2,FOS,FOSL1,FOSL2,FOXC1,GADD45A,GBE1,GCLC,GCLM,GSTM3,HERPUD1,HSPA5,HSPA8,ICAM1,IDO1,IL10,IL2RA,ITGAM,JUN,JUNB,MAP1A,ME1,MIOX,MYH11,NEFH,NOS3,NQO1,NUP153,OSGIN1,PHKA1,PPARG,SCG2,SERPINE1,SESN2,SLC1A1,TNF,TXNRD1,WNT5A,ZNF184	1807 (19)
LMNA	1.443	other		1.626	4.93554	1.16e-05	ACKR1,ACTA2,ADAMTS12,ARRDC4,BAMBI,BCL2,BCL2L13,C19orf81,C8orf48,CACNA1A,CAMK1D,CCNG2,CD28,CD38,CD93,CDH15,CEBPA,CERS6,CFL1,COG3,COL1A1,CSTF2,E2F1,EDN1,EFNB3,ELK1,ERN1,FAM13C,FBXW7,FLT1,FN1,FUT4,GATA4,GCLC,GRAP,GSTT2/GSTT2B,H3-3A/H3-3B,HNF1B,HTRA3,ID3,IER5,IFI44,IFIH1,IGF2R,IRF1,IRF8,ISG20,JAZF1,JUN,KANK3,KCNQ1,KLF7,KRT18,LMNA,LMNB1,LPAR4,LRP4,LRRC4B,MCAM,MIB1,MLLT10,MSC,MYH7,MYL4,NES,NOS3,PCDHGB4…	2139 (21)
NR3C2	-1.194	ligand-dependent nuclear receptor		1.625	5.67162	2.13e-06	ABCC9,APOE,ATP1B1,BCL2,BCL2A1,BCL2L1,BMP4,CACNA1H,CCL2,CCL3L3,CCR5,CNKSR3,CNN3,COL1A1,CXCL8,CXCR2,CXCR4,CYP1B1,ECHDC2,EDN1,EGR1,FGF2,FKBP1A,FKBP1B,FN1,GHR,GPX1,GUCY1A1,HLA-DQB1,ICAM1,IGF1,IL1B,IL6,JUNB,KLF9,MAP2,mir-29,MLF1,MSRB1,NOS3,NR3C1,NRIP3,NRXN1,NSMCE3,PGF,PLAT,PLIN4,PPIB,PROCR,PTPRCAP,RGS2,RRAD,SERPINE1,SGK1,SPHK1,TACC2,TGM2,TNF,TNNT3,TSC22D3,TUBB3,VCAM1,VEGFA,VLDLR,XIRP1	1911 (19)
SMAD2	-1.056	transcription regulator		1.622	4.62342	2.38e-05	ACTA2,ACVR1C,BCL2L11,BIRC5,CACNA1D,CCL20,CCNG2,CDH2,CDKN1A,CDKN2B,CKS1B,COL2A1,CYP51A1,FGF8,FLT1,FN1,FOXP3,FSTL3,FURIN,GADD45B,GZMB,HES1,HHEX,IFNG,IGF1,IL4,IL6,IL6R,INPP5D,ITGB1,MIXL1,MUC4,NET1,NOS3,PCLO,PDGFB,POU5F1,PTHLH,RUNX2,S1PR1,S1PR4,SERPINE1,SMAD3,SMAD7,SNAI1,SOX2,SPHK1,THBS1,TNFSF4,TPM2,VEGFA,VIM	2115 (17)
Gsk3		group		1.62	3.24565	0.000568	BBC3,BCL2,BCL2L11,BIRC5,CCND1,CD40,CEBPA,COL2A1,CXCL8,DDIT3,EGFR,FOS,FSCN1,GDF15,ICAM1,IFNG,IL10,IL12B,IL1B,IL6,IRS1,JUN,MYB,MYH6,NKX2-5,PDCD1,PPARG,SNAI1,STAT1,TBX21,TBX6,TNF,TNFAIP3,TNFRSF10B,TNNC1	1555 (15)
PTP4A1	1.476	phosphatase		1.619	1.92445	0.0119	ACTN1,ACTR2,AHCY,ANXA5,ARHGDIA,C1orf21,CDPF1,COL15A1,COL6A1,COL6A2,FKBP1A,FMR1,HNRNPA3,HNRNPF,IFI16,IGF2BP1,IGFBP7,IMPDH2,ITGA4,ITGB8,LAMA2,MAP3K5,MAPK10,MAPK9,MYADM,NME1,PECAM1,PIK3R1,PPM1E,PRDX1,PRDX2,RCN2,ROCK2,RUVBL1,RUVBL2,SLC35G2,SOS1,SPINT2,STMN1,TAGLN2,TUBA1C,VCAN,VIM
Insulin		group		1.617	4.45593	3.5e-05	ABCA1,ACAT1,ACSL1,AEBP1,AKT1,ANGPTL4,APLN,APOE,APOM,APP,AQP9,ARRB1,ARRDC3,ATF3,ATP7A,BCL2,BCL2L1,BDH1,BDNF,BIRC5,BMPR2,BPGM,C1QTNF12,CACNA1B,CASP1,CCL2,CCL4,CCND1,CCNE1,CCNE2,CCNG2,CCT2,CCT4,CCT5,CCT6A,CCT7,CD34,CD36,CDKN1A,CDKN2B,CEBPA,CEBPB,CEBPD,CETP,CIDEC,CNN1,COL18A1,COL1A1,COL6A1,CREB1,CTH,CYB5A,CYP17A1,CYP19A1,CYP1A1,CYP27A1,DDIT3,DHFR,DNAJB4,DUSP1,ECI2,EDN1,EGFR,EGR1,EGR2,EHHADH,EIF4EBP1,…	2483 (21)
GC-GCR dimer		complex		1.617	1.87943	0.0132	ADRB2,ANXA1,BCL2L11,CDKN1C,DUSP1,FBP1,IL10,IL1R2,IL1RN,NFKBIA,PC,PIK3R1,TFB2M,TSC22D3
TLR2/3/4/9		group		1.616	3.21112	0.000615	CCR7,CD40,CD58,CD80,CD83,CD86,FCGR2B,ICAM1	743 (7)
DDX17	1.112	enzyme		1.616	1.75449	0.0176	ABCA1,CCND1,CDKN1A,CTSD,FOSL1,JUN,MDM2,NET1,S100A4
crocidolite asbestos		chemical toxicant		1.614	2.62709	0.00236	CCND1,CD44,CXCL2,EGFR,FOS,FOSL1,FOSL2,GADD45A,GCLC,GCLM,JUN,JUNB,LIF,SRC,TNFRSF1A,ZYX	1637 (14)
NFKB2	1.254	transcription regulator		1.611	7.30452	4.96e-08	AKR1B1,ANXA5,AR,BCL2,BCL2L1,BCL2L11,BEND5,BIRC3,BMP4,CCDC141,CCL19,CCL20,CCND1,CCR7,CD34,CD83,CD86,CDKN1A,COCH,CR2,CTSS,CX3CL1,CXCL12,CXCL13,CXCL3,CXCL8,CXCR4,CXCR5,ENPP2,FCER2,FOS,FOXG1,FZD5,GBP5,GPR183,HAMP,HLA-DQA1,ICOSLG/LOC102723996,IGFBP4,IGFBP5,IL1B,IL23A,KAZALD1,KCNMB4,KLK3,LMCD1,LTA,LTC4S,MARCKSL1,MCL1,MYB,NFKB2,PCYT1B,PDGFRA,PHLDA2,PXN,RAB3B,RRAD,SCN9A,SELL,SYN1,TGM4,TNF,TNFAIP2,TNFRSF1…	1429 (12)
tributyrin		chemical drug		1.611	5.63827	2.3e-06	ADM,ADRB2,AKAP12,ATF3,BCL2A1,BIRC3,CCL2,CCL20,CD274,CD55,CDKN1A,CSGALNACT2,CXCL3,CXCL8,CXCR4,DUSP1,EDN1,ETS1,GBP1,HBEGF,HNRNPD,HSPA5,ID2,ID3,IL1B,IL24,IL6,MYBL1,NFKB2,OLR1,PDLIM5,SAMD4A,SERPINB2,TNFAIP3,TUFT1	1845 (21)
sodium orthovanadate		chemical reagent		1.607	3.383	0.000414	BCL2L1,CCL2,CCNA2,CCND1,CCNE1,CDKN1A,CEBPA,COL1A1,CXCL8,IFIT2,IL2RA,IL4R,NFKBIA,PLAUR,SERPINE1,SLC2A5,SMN1/SMN2,STAR,TNF	1205 (14)
aphidicolin		chemical toxicant		1.607	2.79588	0.0016	CCNB1,CDKN1A,GADD45A,IFI16,IFI44L,IFIT1,ISG20,MX1,MYH6,OAS1,POLH,STAT1,TERT,TP73	2254 (23)
silicon dioxide		chemical drug		1.606	2.67778	0.0021	CCL2,CXCL8,EGR1,FOS,FOSL1,IL12B,IL1B,IL6,JUN,JUNB,NCF1,SQSTM1,TNF	1823 (17)
MAPK8	1.232	kinase		1.605	5.04528	9.01e-06	ABCA1,ABCB1,ABCB11,ABCB4,ADARB1,AKT1,APOD,APOE,B4GALT1,BBC3,BCL2,BCL2L1,BCL2L11,BIRC3,BMP4,CCNA2,CCND1,CDH2,CDKN1A,CEBPB,COL1A1,CSTA,CXCL8,CYP19A1,CYP1A1,CYP27A1,DDIT3,DNMT1,DUSP1,EGR1,ELK1,EOMES,ETS1,FCER2,FOS,FOSL1,FOSL2,FOXO1,FOXO4,FUS,GADD45A,GCK,GSTM1,HDAC6,IFNG,IL10,IL12B,IL13,IL1B,IL2RA,IL4,IL6,JUN,KLF6,LIF,MMP7,MTHFR,MTTP,MVP,PLAU,PLAUR,PPARD,PTGES,RBP1,SESN2,TBX21,TLR2,TNF,TNFAIP3,TSC22D…	1915 (16)
TARDBP	-1.151	transcription regulator		1.604	3.12494	0.00075	AIF1,AMOT,BCL2L11,BST2,C3,CD36,CSPG4,CYP51A1,DHCR7,GABRA5,GBP2,HDAC6,HLA-A,HLA-E,IFNG,IGFBP5,IL1B,IL6,INSIG1,LAMB3,LRG1,LSS,MFN1,MIAT,mir-132,MOG,MVD,MYRIP,NUPR1,PLPPR3,PMVK,PRKDC,PRKN,PTBP2,RAB25,RINL,SERPING1,SFRP1,SQLE,SQSTM1,SULT4A1,TBC1D1,TNF,TRIP10,TSPO,TSPOAP1,TUSC1,VLDLR,WNT5A	1556 (17)
PLK4	-1.372	kinase		1.604	2.38195	0.00415	CD40,CITED2,CXCL10,EDN1,FGL2,IFIT2,IL15,IL15RA,IL1B,IRF1,MERTK,PLAT,RBL1,RGS1	1466 (15)
NFKBIB	-1.205	transcription regulator		1.602	5.28651	5.17e-06	BCL2A1,BCL2L1,BCL2L11,CASP6,CASR,CCL2,CD40,CD80,CD86,CRADD,CXCL2,CXCL8,DEFB4A/DEFB4B,EGR1,ICAM1,IFNG,IL1B,IL6,NFKBIA,NOS3,PLAU,RYR1,SFTPA1,SMAD7,SYTL1,TNF,TNFSF10,TP73,VCAM1,VEGFA	1147 (10)
alitretinoin		chemical drug		1.601	4.15304	7.03e-05	ABCA1,ABCB11,ABCC3,ABCG1,ACACB,ADAM28,ADAMTS4,ANXA5,APOD,APOM,APP,AR,ATP1A3,BCL2,BCL2A1,BCL2L1,BMP3,CASP1,CASP4,CCL20,CCND1,CD1A,CD36,CD38,CD5L,CD83,CD86,CDKN1A,CPT1B,CXCL10,CXCL13,DHRS9,DUSP1,FN1,FOS,FOXP3,HOTAIRM1,HOXA1,HSD17B1,IFNGR1,IL2RA,IL2RB,IL6,IRF1,ISG15,ITGAM,MKI67,MLYCD,MTTP,MUC1,MYH6,PLA2G15,PLAU,PLTP,POMC,PPARA,PPARG,RARG,RBP1,SCD,SLC27A1,SMAD1,SMAD3,SNAI1,STRA6,TGFB3,UBA7,VIM	1704 (17)
SRA1	1.263	transcription regulator		1.601	2.56067	0.00275	CAV1,CCL20,HES1,LIPE,PPARA,PPARG,SLC2A12,SLC2A3,STAR,THBS1,TMEM65,TMPRSS2	1976 (18)
dorsomorphin		chemical - kinase inhibitor		1.6	1.55752	0.0277	ACTA2,BDNF,BIRC5,CD274,COL1A1,COL2A1,CYP19A1,EGR1,EOMES,FURIN,GATA3,GDNF,ID1,ID2,IL13,IL6,LAMC1,mir-103,PDCD1,PDCD1LG2,PNPLA2,PNPLA3,PPARG,SELENOP,SERPINF1,SLC5A5,SOX9,STAR,TNF
CEBPD	1.739	transcription regulator		1.597	8.64207	2.28e-09	ALOX5AP,AURKC,B9D1,BCL2A1,BIRC5,BRCA1,C3,CASTOR2,CCL20,CCL3L3,CCNB1,CCNB2,CCND1,CDKN1A,CDKN1C,CEBPB,CEBPD,CLU,CPB2,CSF1R,CSF3R,CXCL3,CXCL8,CXCR4,CYP19A1,CYP1A1,DDIT3,DEPP1,FBXW7,FOS,HAMP,HGF,IGF1,IGFBP5,IKBKE,IL10,IL1B,IL23A,IL6,ITGAM,ITGAX,IVL,MIA,MITF,PDGFA,PDGFRA,PPARG,PRKDC,PRL,PTAFR,RB1,TLR8,TLR9,TNF,TNFAIP6,TNFSF11,VLDLR,XBP1	1949 (19)
CXCR4	-2.502	G-protein coupled receptor		1.597	6.95468	1.11e-07	ACKR3,AXL,BCL2,CCL2,CCND1,CD44,CD69,CD9,CDH2,CDKN1A,CSF2,CXCL10,CXCL12,CXCL8,CXCR2,CXCR4,DPP4,EGFR,EGR1,GAD1,ID1,ID2,IGFBP7,IL10,IL1B,IL24,IL2RA,IL6,JUNB,let-7,RRAS,RUNX2,TNF,TNFRSF10B,TNFRSF10C,TNFRSF10D,TNFSF10,TNNC1,VEGFA	1982 (18)
Igm		complex		1.595	9.89963	1.26e-10	BCL2,BCL2A1,BCL2L1,BCL2L11,BIK,BIRC5,CCL3,CCNA2,CCND2,CD22,CD40,CD44,CD69,CDKN1A,CX3CL1,CXCL8,DUSP2,EGR1,ELK1,FCGR2B,GPSM1,GRAP2,ID3,IL10,IL17A,IL1B,IL2RA,IL6,JAK2,MCL1,NFKB2,POLH,POLI,PRDM1,PTAFR,SAMSN1,TNF,TNFRSF13B,TNFRSF14,TNFSF4,TRAF1,TRAF5,WNT16,XBP1,ZFP36L1	1087 (16)
TNFRSF18	1.277	transmembrane receptor		1.595	3.5784	0.000264	BCL2L1,CCL2,CCL3L3,CD247,CDKN1A,CXCL3,CXCL8,ICAM1,IDO1,IFNG,IL17A,IL6,TNF,TNFRSF9	1264 (12)
KLRB1	-1.992	transmembrane receptor		1.594	1.78781	0.0163	CCL3L3,CCL4,CSF2,IFNG,TNF
MAP3K14	-1.267	kinase		1.593	4.94692	1.13e-05	ACTA2,BCL2L1,BIRC3,BST1,CD44,CXCL2,CXCL8,CYP19A1,EGFR,GADD45A,GBP5,ICAM1,ICOSLG/LOC102723996,IL10,IL13,IL15,IL1A,IL1B,IL1R2,IL4,IL6,IL7R,LTA,LTB,NFKB2,NFKBIA,NFKBIE,PDE3B,PLA2G4A,PON2,RCAN1,REL,SIX2,TNF,TNFAIP3,TNFAIP6,TNFSF10,TNFSF4,VCAM1,XBP1	1402 (10)
RB1	2.789	transcription regulator		1.591	10.2464	5.67e-11	AKT1,ANGPT2,APPL2,ASF1B,ATAD2,ATF2,ATF3,ATP1B1,AURKB,BARD1,BCL2,BCL2L11,BIRC5,BLM,BNIP3,BRCA1,BTG3,CALCRL,CASP4,CASP6,CCL1,CCL20,CCL3L3,CCNA2,CCNB1,CCND1,CCNE1,CCNE2,CD274,CD44,CD83,CDC25C,CDCA4,CDCA5,CDK1,CDK5R1,CDKN1A,CDT1,CEBPA,CELSR3,CHAF1A,CHRNA1,CHRNB1,CITED2,CNOT6L,COX17,CPA4,CRADD,CSF2,CSF3,CWC27,CXCL2,CXCL3,CXCL8,CYP27B1,CYSLTR1,DCK,DCTN4,DDB2,DDIT3,DDX11,DHFR,DLST,DNMT1,DUSP1,E2F1,E2F2,…	1666 (17)
AGER	1.137	transmembrane receptor		1.59	2.90658	0.00124	APP,BCL2,CCL2,CCL3,CCL3L3,CCL4,CCND1,CDKN1A,CHGA,CHGB,CSF1,CXCL2,CXCL3,CXCL8,EGR1,FLT1,FN1,ICAM1,IFIT1,IL10,IL1B,IL4R,IL6,PDGFB,S100A9,SCG2,SERPINE1,TJP1,TLR4,TNF,TUBB3,VCAM1,VEGFA	1696 (12)
(Z,E)-5-(4-ethylbenzylidine)-2-thioxothiazolidin-4-one		chemical reagent		1.587	2.21183	0.00614	CCNB1,CDH2,COL1A1,CTNNAL1,FOXM1,GLI1,HSP90AA1,let-7,SNAI1	1430 (7)
IRF8	1.44	transcription regulator		1.585	9.49214	3.22e-10	ACVRL1,AICDA,AKAP12,APOE,ARID5B,ASAH1,ATF3,B2M,BANK1,BCL2L1,BCL6,CCR2,CCR7,CD4,CD40,CD80,CD83,CD86,CDKN1A,CEBPA,CIITA,CREM,CSF1R,CSF3R,CTSS,CUX2,CXCL10,CXCL9,EGR1,EGR2,FOS,GABRQ,GABRR2,GBP1,GNA15,HCN3,ICAM1,ID3,IDO1,IFI44L,IFI6,IFIT2,IFIT3,IFNG,IGSF9B,IL12A,IL12B,IL15,IL17RA,IL18,IL1B,IL1RN,IL27,IL4,IL6,IRF5,IRF7,IRF8,ISG15,ITGAM,JAK1,KCNK6,KCNQ1,KLF4,KLF6,LHX2,LIF,MDM2,mir-24,NFATC1,OAS1,OAS2,OA…	1459 (13)
HIVEP3	1.106	transcription regulator		1.584	3.70774	0.000196	ALG2,CREB3L2,GATA3,IL4,JUN,JUNB,S100A4,TNF,TNFSF11	1778 (17)
fenamic acid		chemical reagent		1.584	3.17718	0.000665	A2M,ANXA1,ANXA2,BIRC3,C4A/C4B,CD44,CDCP1,CLU,EFEMP2,ELF3,FBLIM1,FCGR2A,GCGR,GPNMB,GSTM3,IER3,LAMC2,LGALS3,MCM3,PLA1A,RBM3,RCN1,S100A10,S100A11,SELL,STING1,TIMP1,TMSB10/TMSB4X,TNFRSF12A,UPP1,VIM
ITGA6	3.02	transmembrane receptor		1.584	1.88273	0.0131	BCL2,BCL2L1,BFSP1,BIRC5,CCND2,ENPP2,ITGA2,ITGA3,ITGA7,VEGFA
Ck2 alpha		group		1.583	2.49485	0.0032	BCL2L1,BIRC2,BIRC3,BIRC5,CXCL10,CYP19A1,LTA,MGMT,TNF	1826 (20)
hydroxyurea		chemical drug		1.581	9.9393	1.15e-10	ABCB1,CCL2,CCL3,CCNB1,CCND1,CCND2,CCNE1,CDC7,CDKN1A,CHEK1,CSF2,CSF3,CXCL2,CXCL3,CXCL8,E2F2,EDN1,GADD45A,GATA3,GINS2,GMNN,GPX1,H2AX,HERC5,HJURP,IFI6,IFIT1,IL1A,IL23A,IL6,ISG20,KLF4,KRT18,KRT2,LGALS12,MARCKS,MCAM,MCM2,MCM5,MDM2,MX1,NMI,OAS1,OASL,PDE4A,POLH,PRDM1,RASGRP3,RRM2,SMN1/SMN2,STAT1,TNF,TNFAIP3,TP73,TRAF1,UHRF1	1872 (22)
HSP90B1	2.013	other		1.578	1.54975	0.0282	CALR,CD40,CD86,EIF5A2,HSP90B1,HSPA5,IFNG,IL12B,IL17A,IL18,IL1B,IL23A,IL6,ITGA4,RAB13,RAB15,SSR3,SSR4,TLR2,TLR4,TLR9,TNF,XBP1
PIK3R2	-1.096	kinase		1.577	3.69037	0.000204	BCL2L1,CASP6,CXCL10,FOXO1,IFNG,IRF7,ISG15,MKI67,PIK3R1,PLAU	1874 (19)
TYK2	1.184	kinase		1.577	3.06048	0.00087	C5AR1,CD274,CD36,CSF3,ENPP2,HAMP,IFNG,IL12A,IL12B,IL17A,IL18R1,IL1B,IL23A,IRF1,LILRB4,PDCD1LG2,SOCS3,STAT3	1422 (12)
butyric acid		chemical - endogenous mammalian		1.576	20.5171	3.04e-21	A2M,ABCB1,ABCG1,ACHE,ACP2,ADCY1,ADGRE5,ADGRG1,AFF1,ALOX15B,ALOX5,ALPK2,ANXA1,ANXA2,ANXA5,AR,ATP2B4,ATP7B,BCL2,BCL2A1,BCL2L1,BIRC5,CALM1 (includes others),CBS/LOC102724560,CCL20,CCNA2,CCNB1,CCNB2,CCND1,CCND2,CCNE1,CCNG1,CCNH,CCR1,CCR3,CCR5,CD36,CD44,CD80,CD81,CD82,CD83,CD86,CDC20,CDC25C,CDK1,CDK3,CDK6,CDKN1A,CDKN1C,CETN2,CKS1B,CLU,CREBBP,CSF1,CSF2,CXCL8,CXCR4,CYP1A1,DAG1,DDR1,DNM1,DTYMK,DUSP1,E2F1…	2109 (15)
EPO	2.421	cytokine		1.575	4.46852	3.4e-05	ANGPT2,ANK1,APOBR,B2M,BCL2,BCL2L1,BCL2L11,BCL3,BCL6,BDNF,BLM,BLVRB,BMP4,BNIP3L,BTG1,BZW2,CA2,CCL19,CCND2,CCNG2,CD36,CD86,CDKN1A,CISH,CLGN,CREG1,CXCL12,CXCR4,DCSTAMP,DDIT3,DNAI2,EDN1,EGR1,EPO,EPOR,FGF2,FOS,GAPDH,GATA3,GATA4,GDF15,GLUL,H2AZ1,HK3,HLA-DRB1,HMGB1,HMGN2,HNRNPF,ID1,ID2,IL13,IL18,IL6,ITGA4,ITGB1,JUN,JUNB,KCNV2,KPNA2,MAN2A1,MCL1,MID1IP1,MPO,MTF2,MYB,N4BP2L1,NFATC1,NFKBIA,NMNAT1,NOS3,NPM1,…	1710 (13)
JAG1	2.518	growth factor		1.574	7.51004	3.09e-08	ACTA2,APOD,CCND1,CCND2,CD86,CDKN1A,CDKN2B,COL1A1,CYP19A1,DTX1,DUSP1,DUSP10,DUSP2,DUSP5,DUSP8,ERBB3,F11R,GADD45A,GDF15,HES1,HEY1,HEYL,IFNG,IL13,ITGB3,JAG1,LAMC2,MYH11,NOTCH4,NR2F2,PDGFRB,PTPRK,RUNX2,SMAD3,SNAI1,SOX2,STAR,TGFB3,TRPA1,VIM,WNT3,WNT4	1483 (18)
homocysteine		chemical - endogenous mammalian		1.574	3.6216	0.000239	ADM2,ANXA2,ATF3,ATF6,BCL2,BCL2L1,CCL2,CCND1,CDKN1A,CLU,CXCL10,CXCL12,CXCL8,DDAH2,DDIT3,ECI2,EDN2,ELOVL5,ELOVL6,FA2H,FADS1,FGF2,FOSL2,GADD45A,HAMP,HCAR2,HERPUD1,HSPA5,ID1,IL1B,IL6,ITGAM,LTA4H,MSMO1,MTHFR,OLR1,OXTR,PGF,PRDX1,PRDX2,PTGS1,SCD,SOCS3,TIMP1,VCAM1,VEGFA,XBP1	1963 (21)
RIPK1	1.122	kinase		1.574	3.47886	0.000332	ADSS2,APP,ASS1,BIRC5,CCL2,CCL3L3,CSF2,CSF3,CXCL10,CXCL2,CXCL8,EGFR,GRN,HAMP,IL10,IL12B,IL13,IL1B,IL4,IL6,MAP3K14,MDM2,PDGFB,SLC1A1,SLC1A3,SOX9,TNF,TNFAIP3,VEGFA,WNT5A	1077 (12)
SLC9A3R1	-2.093	transporter		1.574	1.82391	0.015	CCL3L3,CCL4,CCR8,CXCL2,CXCL3,EGFR,ERBB2,ERBB3,EZR,HAMP,IL13,IL17A,IL4,IL6,let-7,mir-221,OPRK1,S100A4
TRADD	1.403	other		1.573	7.92812	1.18e-08	AR,BCL2A1,CCL2,CSF2,CX3CL1,CXCL2,CXCL3,CXCL8,DNMT1,ICAM1,IL18R1,IL6,IRF1,KLK3,NFKBIA,RND1,TNF,TNFAIP2,TNFAIP3,TRAF1,UBD,VCAM1	1075 (12)
mir-96		microRNA		1.573	7.02919	9.35e-08	AKT1S1,BRMS1L,DDX60,FN1,GHR,HERC6,IFI44L,IFI6,IFIT1,IFITM1,IRS1,ISG15,JUP,NMI,OAS2,RSAD2,RTP4,SLC30A7,SLC39A1,SLC39A3,SLC39A7,SLC39A9,SLFN5,SP110,SYTL4,TCF3,TRANK1,VIM,XAF1
SELP	-1.22	transmembrane receptor		1.572	8.37469	4.22e-09	APOL3,BCL2A1,BST1,CCL2,CCL3,CCL3L3,CCL4,CDKN1A,CSF2,CXCL2,CXCL8,CXCR4,CYP1B1,GNA13,GPT,HCAR3,HCK,IGF1,IL1B,IL1R2,IL4R,IL6,MKI67,PLAUR,SERPINB9,THBD,TNF	1964 (15)
Smad2/3		group		1.571	3.38616	0.000411	ABCG2,ACVR1,ACVR1C,BIRC5,CBFB,CCL2,CD274,CDKN1A,CDKN2B,CNN1,EOMES,FOXP3,FSTL3,FUT7,GATA3,GCNT1,HMCN1,ID1,mir-130,mir-25,mir-320,mir-423,MIXL1,MXD1,POU5F1,RUNX1,RUNX2,S100A4,SELPLG,SERPINE1,SMAD7,TBX21,TGM2,TMEFF1	1288 (9)
CD9	5.162	other		1.57	2.07572	0.0084	CD69,DPP4,HAMP,ITGA2,ITGA3,ITGA5,ITGA6,ITGB1,TJP1,TNF,VEGFA,WNT2B,WNT5A	1632 (22)
EFNA2	2.057	kinase		1.569	4.66354	2.17e-05	ABCA12,APOBEC3G,BACH2,BDNF,CD247,CDC5L,CSF2,DCBLD2,ETV5,FOSL1,FOXI1,IRF7,KLK3,KRT18,NEDD4L,NKX3-1,NOS1,NT5E,PKP1,PLAT,PTHLH,PXN,RUNX1,SLC20A1,SOX9,TCF3,TRIM2,TRIM5,UBE2C,UBE2S	502 (7)
O6-benzylguanine		chemical drug		1.568	2.31426	0.00485	CCNB1,CCNB2,CDKN1A,H2AX,MGMT,MKI67,MSH2	1751 (19)
PTK2	-2.636	kinase		1.567	2.95078	0.00112	ACTA2,BIRC2,BIRC3,CCND1,CDKN1A,COL1A1,CSPG4,FN1,FOS,GATA4,IL6,IRS1,ITGA5,KRT18,KRT8,LPP,MMP7,MYH6,MYH7,P4HA1,PDGFRB,PRRX1,PTK2,PTK2B,SNAI1,THBS1,TIMP1,TJP1,VCAM1	1894 (19)
HOXA11-AS	3.574	other		1.565	1.62342	0.0238	BCL2,CDH2,CDKN1A,NOS3,SNAI1,SOD1,STAT3,ZEB2
DETA-NONOate		chemical reagent		1.563	4.66354	2.17e-05	ACO1,ACTA2,AKT1,BCL2L1,BIRC2,BIRC3,CAV1,CCL3,CCND1,CDKN1A,CNN1,CXCL3,CXCL8,DUSP1,FOS,ICAM1,IFNG,IL6,IRF7,LOXL2,PDE3B,SERPINE1,STAR,TAGLN2,TIMP1,TNF,TNFRSF11B,TNFSF4,TP73,VCAM1	1748 (17)
Retnla		other		1.563	1.43533	0.0367	ACTA2,HES1,IL17A,IL23A,IL6,JAG1,MYH7,NOTCH1
MYF6	3.133	transcription regulator		1.562	3.41229	0.000387	ACACB,ANG,ANGPTL4,APLN,BDNF,CCL1,CDKN1A,CTSB,CX3CL1,CXCL10,CXCL13,DPP4,EPO,FGF2,GDF11,GDNF,HBEGF,IFNG,IGF1,IL10,IL13,IL15,IL17A,IL1A,IL1RN,IL23A,IL32,IL6,IL7,LIF,LTA,MMP7,MYF6,NAMPT,OSM,PDGFA,PDGFB,SERPINE1,SERPINF1,THBS1,TNF,TNFRSF11B,TNFRSF14,TNFRSF8,VEGFA	678 (7)
PPIF	-1.235	enzyme		1.561	5.47886	3.32e-06	ARHGAP22,BMP6,CCL1,CCL2,CCL20,CCL4,CCR1,CCR2,CCR5,CCR8,CCRL2,CITED2,CMKLR1,CMTM6,CSF2,CX3CL1,CX3CR1,CXCL10,CXCL12,CXCL2,CXCL3,CXCR2,CXCR3,CXCR4,FEZ1,HCAR1,HEY1,HGF,IL13,IL6,IRF5,LIF,MCM6,MEIS2,NDN,PIF1,PITX2,RGS3,SFRP1,SLCO4A1,SPON2,TFAP2A,TNF,WNT5A,XCL1,ZCCHC18	1206 (11)
EBF1	-1.843	transcription regulator		1.561	3.74715	0.000179	ACACB,AKT3,BCL6,C8orf44-SGK3/SGK3,CBLB,CCL22,CCL3,CCL3L3,CCL4L1/CCL4L2,CD160,CEBPB,COL1A1,CRABP1,CSF2,CXCL10,CXCL12,EBF1,EIF4EBP1,FLOT2,FOXO1,GATA3,GYS1,IFNG,IGLL1/IGLL5,IL12A,IL12B,IL12RB1,IL32,IL6,INPP5D,IRF1,IRF7,IRS1,LEF1,LIPE,LNPEP,MAPK10,MKNK2,PDE3B,PHKA1,PIK3R1,PPARG,PPP1R3C,PPP1R3D,PRDM1,PRKAR2A,PRKAR2B,PTPRF,RAG1,RASGRF2,SCD,SHC4,SOCS1,SOCS3,SOS1,STAT1,TCF3,TLR2,TLR3,TLR4,TNFSF11	1475 (18)
chloropromazine		chemical drug		1.557	1.82391	0.015	CD83,DEPP1,DHCR7,FOS,IL10,IL18,IL1B,LSS,MSMO1,PLCB1,RDH11,SCD,SLC2A3,SQLE,TMEM140,TNF,TSC22D3,WIPI1
MRTFA	1.068	transcription regulator		1.555	7.03386	9.25e-08	ABLIM1,ACTA2,ACTG1,ACTG2,ALCAM,AMOTL2,ANLN,ARHGEF11,BCL2L1,CBFB,CD24,CDC42BPA,CDC42EP2,CDC42EP3,CMA1,CNN1,COL4A5,CTTN,CXCL12,CXCL9,CXCR4,DMKN,DNAJB4,EDN1,EFNA5,EGR1,EGR2,EGR3,EYA2,EZR,F11R,F2R,FLI1,FNBP1L,FOS,FSCN2,G0S2,GADD45A,GAS2,GFI1,HAMP,HLA-A,ICAM1,ID1,ITGA5,ITGA6,ITGB1,IVL,LILRB4,LIMK1,LMNA,MAP2,MAPK13,MGST2,MYH10,MYH11,MYL9,MYLK,OSCP1,P2RX1,P2RY1,PDGFRA,PFN2,PRSS57,RGMB,RPS6KA6,RUNX1,S100…	1583 (19)
gentamicin C		chemical drug		1.553	2.7122	0.00194	A2M,ANXA1,ANXA2,BIRC3,C4A/C4B,CD44,CLU,DMD,EFEMP2,ELF3,FBLIM1,FCGR2A,GCGR,GPNMB,IER3,IL23A,LAMC2,LGALS3,MCM3,PLA1A,RBM3,S100A10,S100A11,TIMP1,TMSB10/TMSB4X,TNFRSF12A,UPP1,VIM	1298 (7)
2,4,5,2',4',5'-hexachlorobiphenyl		chemical toxicant		1.552	1.39469	0.0403	ABCC3,ADRB2,AGPAT4,AKAP12,ATP1B2,BCL2,BCL9L,CAMKK1,CDCA2,CREM,CYP2C18,DHFR,EBF1,ELAC2,ELOVL6,FGFR1,FMO5,GADD45A,GADD45B,GSTM4,IL1RAP,INSIG2,MBNL2,MYO5B,NOL3,PALS2,PICALM,PIK3C2A,PTPRS,RBPMS,SLC1A4,SMAD7,SMOC1,SMPD3,SNRPA1,UGDH,WEE1,ZWINT
Trp53cor1		other		1.551	2.07572	0.0084	ATF2,BBC3,CDKN1A,IL1B,IL6,MCL1,MDM2,NPAS1,NPTX1,NTN1,PERP,SSTR2,STAT3	2364 (24)
GSN	1.108	other		1.55	2.09098	0.00811	ACTA2,BCL2,COL1A1,COL2A1,FN1,HAMP,NOS3,PLAU,PLAUR,SOX9	1677 (21)
MALT1	-1.106	peptidase		1.549	3.06048	0.00087	CD38,CD44,CD83,CXCL2,CXCL3,FOXO1,FOXP3,IKZF2,IL10,IL17A,IL1B,IL23A,IL2RA,IL36G,IL6,NT5E,REL,TNF	1567 (14)
ETS2	-1.969	transcription regulator		1.548	2.7986	0.00159	BCL2L1,BMP4,BRCA1,CD34,CDKN1A,CSF1R,CSF3,CTSB,CYP27A1,ERBB2,FLT1,FOS,HPSE,ICAM1,IL12B,IL2RA,JUN,JUNB,KRT18,mir-223,mir-29,PCSK6,PLAAT3,PLAU,PRL,PTHLH,SOX2,TERT,TLR9,TNF,TNFSF11,TNFSF14	2109 (23)
PKNOX2	4.087	transcription regulator		1.548	2.21396	0.00611	BBC3,BTG2,CDKN1A,COL2A1,EGR1,GADD45A,HDAC1,IGFBP5,STAT1,TP73,VIM
hexachlorobenzene		chemical toxicant		1.547	1.82974	0.0148	A2M,ANXA1,ANXA2,C4A/C4B,CD44,CLU,EFEMP2,ELF3,FBLIM1,FCGR2A,GCGR,GPNMB,IER3,LAMC2,LGALS3,RCN1,S100A10,S100A11,TIMP1,TMSB10/TMSB4X,TNFRSF12A,UPP1,VIM
ARHGAP5	5.609	enzyme		1.546	1.88273	0.0131	ACTA2,COL1A1,COL6A1,FN1,LAMA1,LOX
arecoline		chemical drug		1.545	2.3363	0.00461	ACTA2,BCL2L1,ERBB2,F2R,HIF1A-AS1,IL6,PGF,S100A4,SNAI1,TJP1,TNFRSF1B,VCAM1	1988 (21)
BAG6	-1.014	enzyme		1.544	1.46725	0.0341	BBC3,CDKN1A,COL1A1,SERPINE1,SESN1
SPON2	2.35	other		1.543	2.22475	0.00596	CCL2,CSF1,IL10,IL6,TNF	1106 (9)
IRF9	1.295	transcription regulator		1.542	10.8041	1.57e-11	CCL19,CD274,CD69,CIITA,CXCL10,CXCL8,GBP1,GBP6,IFI27,IFIT1,IFIT2,IFIT3,IFITM1,IFITM3,IFNG,IL12A,IL18,IL1A,IL27,IL6,IRF1,IRF5,IRF7,IRF8,ISG15,MX1,MYH7,OAS2,PDCD1,RTP4,SOCS1,SOCS3,STAT1,STAT2,STAT3,TNF,TNFSF10,USP18,ZBP1	1385 (16)
CDK9	1.186	kinase		1.541	3.16115	0.00069	CCNB1,CCND2,CD80,CDKN1A,COL1A1,CXCL2,CXCL8,CXCR4,CXCR5,DDIT3,FOS,FRAT2,HLA-DQA1,IL6,MAGI1,NCL,NFKBIA,PPARG,PTBP1,RUNX1,STC2,TERT,TNFAIP3,UHMK1,VIM,WNT5A	1990 (14)
puromycin aminonucleoside		chemical reagent		1.541	1.87615	0.0133	A2M,ACTG1,ANXA1,ANXA2,C4A/C4B,CD2AP,CD36,CD44,CDCP1,CLIC5,CLU,EFEMP2,ELF3,EXOC2,FBLIM1,FCGR2A,GCGR,GPNMB,GSTM3,HADH,HSPA5,HSPD1,IER3,ITGB1,LAMC2,LGALS3,MCM3,NCF1,NES,PLA1A,RBM3,RCN1,S100A10,S100A11,SDK1,TIMP1,TMSB10/TMSB4X,TNFRSF12A,UPP1,VIM
HDAC6	1.296	transcription regulator		1.541	1.82102	0.0151	AR,BCL2,BIRC5,COL1A1,ICAM1,IFNG,IGF1,IL10,IL6,JUN,JUNB,LTBP2,MST1,NR3C1,PDGFB,PLAU,SERPINE1,TNF,VCAM1,VIM
GW501516		chemical drug		1.54	2.35164	0.00445	ABCA1,ACSL1,ANGPTL4,APOD,BCL2,CCND1,CDKN1A,COL6A1,CPT1B,ECH1,FGFR1,FLT1,GPD1,GZMH,ICAM1,IGFBP2,IGFBP5,IL1A,IL1B,IL36G,IL6,LAMB3,LIPE,LIPG,NOTCH1,PLAC1,PLAT,PPARA,PPARD,PPL,S100A9,SCD,SERPINB2,SLC27A1,SNCG,SOD1,THBS1,UCP2,VEGFA,VLDLR,VNN1	1803 (19)
FZD9	-1.355	G-protein coupled receptor		1.539	1.75449	0.0176	CDH2,CXCL10,CXCL14,IFI16,IFI44,IRF7,ISG15,SPRY4,STAT1
adenosine		chemical - endogenous mammalian		1.536	4.70553	1.97e-05	BCL2L1,CASP12,CD28,CD69,CD80,CD86,CX3CR1,CXCL8,CXCR4,DPP4,FOS,GAPDH,H2AX,HSPA5,ICAM1,IFNG,IL10,IL12B,IL1B,IL1R1,IL2RA,IL6,KLRC4-KLRK1/KLRK1,NCR3,NR3C1,PLAT,SERPINE1,SOCS3,TIMP1,TLR4,TNF,VEGFA	1281 (15)
cucurbitacin B		chemical - endogenous non-mammalian		1.53	1.7167	0.0192	BCL2,BCL2L1,BIRC5,CCNA2,CCNB1,CDKN1A,TERT
MRTFB	-1.005	transcription regulator		1.527	10.752	1.77e-11	ABLIM1,ACTA2,ACTG1,ACTG2,ADM,ALCAM,AMOTL2,ANLN,ARID5B,BCL2L1,CBFB,CD24,CDC42EP3,CMA1,CNN1,COL4A5,CRIM1,CXCL12,CXCR4,DMKN,DNAJB4,EDN1,EDNRA,EFNA5,EGR1,EGR2,EGR3,EYA2,EZR,F11R,F2R,FILIP1L,FJX1,FLI1,G0S2,GADD45A,GAS2,GFI1,HLA-A,ID1,IGFBP5,ITGA5,ITGA6,ITGB1,KAZN,LILRB4,LIMCH1,LMNA,MAP2,MAPK13,MGST2,MTMR10,MYH10,MYH11,MYL9,NFKBIZ,NRXN2,NUAK1,OSCP1,P2RX1,P2RY1,PCDH18,PDGFRA,PDGFRL,PRSS57,PTPRO,RGMB,RPS…	815 (7)
CARM1	-1.068	transcription regulator		1.527	2.93181	0.00117	ABCB11,C3,CCNB1,CCNE1,CDKN1A,CSF3,CXCL10,CXCL3,DHFR,EGR3,FOS,GADD45A,GCLC,HSP90AA1,ICAM1,IGFBP4,mir-223,PFKFB2,PTGES,STC2	2247 (21)
KLF1	-1.175	transcription regulator		1.527	1.61083	0.0245	BCL11A,CD44,CD55,CDKN1A,CDKN2C,E2F2,FLI1,GABPA,HEMGN,ICAM4,IL12B,IL17RB,KLF3,PECAM1,SERPINH1,SLC3A2,SLC43A1,SLC4A1,TFR2,TFRC
HMGB2	-1.357	transcription regulator		1.526	1.82974	0.0148	CCL20,CCND1,CD36,CEBPA,CEBPB,COL2A1,CSF3,CXCL2,CXCL8,FZD2,GLI3,IL1B,IL6,IRS1,LIPE,PPARG,RUNX2
ABL1	1.178	kinase		1.524	3.85078	0.000141	BCL2L11,C3,CAV1,CCNA2,CCND1,CCND2,CCNE1,CDKN1A,CSF1,CTSB,DHFR,DOK1,GADD45A,IER3,IFNG,MDM2,NME1,NOX5,SMPD1,TGFB3,TP63,TP73,VEGFA	1967 (18)
temozolomide		chemical drug		1.521	2.84164	0.00144	BCL2,BCL2L1,CCL2,CDC25C,CDKN1A,CXCL10,CXCL8,CXCL9,DDIT3,H2AX,ID1,IL6,ITGB3,MGMT,MSH2,MSH6,NFKBIA,PRL,QPRT,SAA2,TNFRSF10B,TP63	1895 (18)
FGF10	-1.232	growth factor		1.518	2.75945	0.00174	AHNAK,ANXA1,ANXA2,BMP4,CEBPB,CTSB,CYP19A1,CYP1B1,CYP51A1,IL10RB,LFNG,LIPE,LSS,MYH6,MYH7,PERP,S100A13,S100A6,SCD,SNAI1,SOX2,SOX9,SPRY2,TACSTD2,VNN1	2152 (23)
diaminopimelic acid		chemical - endogenous non-mammalian		1.518	1.7167	0.0192	CD4,CXCL3,IFNG,IL10,IL6,ISG15,TNF
CNR1	3.569	G-protein coupled receptor		1.517	4.64397	2.27e-05	APBB1,APOE,ARTN,BCL11B,BDNF,BIRC5,BMP4,CCNB2,CDCA3,CDK1,CEACAM1,CNR1,CORO2A,CXCL10,CYP27A1,CYP7B1,DDX4,DYRK2,EAF2,EOMES,EPS8,ERBB2,ERRFI1,FGF2,FOS,FOXM1,GAD1,GDNF,GPX1,HAGH,HEYL,IFNG,IGF1,IL10,IL6,KIF11,LAMA1,LRP4,MESD,MSX1,NDN,NR3C1,NTN1,PAX6,PDGFRA,PDGFRB,PECAM1,PIK3C2A,PLAU,PLD1,PLSCR1,POMC,PTK2B,RAD21,S100A6,SLC22A17,SLC29A1,SOD1,STAT3,TIMP1,TJP1,TNF,UPK2,WNT6	1728 (21)
ACVR1C	2.664	kinase		1.514	1.95078	0.0112	BCL2L1,CCND1,CCNG2,CDKN1A,CDKN2B,CEBPA,FOS,JUNB,KLF4,SERPINE1,SMAD7,SNAI1
OLR1	-3.29	transmembrane receptor		1.513	1.82102	0.0151	ACE,CCL2,CD68,CXCR2,FN1,HAMP,ICAM1,IL10,IL6,ITGAM,NCF1,NOS3,OLR1,OSCAR,RARG,RBP1,STRA6,TGFBR3,TNF,VCAM1
SIX2	-12.326	transcription regulator		1.512	2.83863	0.00145	BBC3,CACNA1A,CACNA1D,CALM1 (includes others),CAMK1D,CCNB1,CCNB2,CDKN1A,CDKN1C,CHGA,CHGB,CPE,FBP1,GCGR,GCK,GREM1,HSPD1,IL1A,MAPK10,MCM2,MDM2,NUSAP1,PAX6,POLE3,POLE4,PTPRN,PTPRN2,TCF7L2
PI3	-1.906	other		1.51	3.79588	0.00016	ACTA2,CEBPB,CXCL8,FGF2,IFNG,IL12B,NFKBIA,TNF	1416 (14)
LNX2	-1.014	other		1.51	2.76195	0.00173	BCL2,HES1,HES5,HES6,JAG1,LFNG,NOTCH1,TCF7L2
KCNJ10	-1.426	ion channel		1.508	2.21396	0.00611	CXCL10,FOSL1,GADD45A,GBP5,GBP6,ICAM1,IGFBP2,LGALS3,SGCA,TIMP1,TNFRSF12A
CYLD	1.25	transcription regulator		1.507	3.53462	0.000292	AXIN2,CD40,CD80,CD86,CR2,CXCL8,ICOS,IFNG,IL10,IL12B,IL17A,IL1B,IL2RA,IL6,IL7R,JUN,NFKB2,NFKBIA,OPRK1,REL,SERPINE1,TNFSF4	1243 (16)
bis(3',5')-cyclic diguanylic acid		chemical - endogenous non-mammalian		1.507	1.78781	0.0163	CD86,IL15,IL15RA,IL6,TNF
hypochlorous acid		chemical drug		1.501	2.24872	0.00564	ACTA2,IL13,IL4,IL6,ITGA3,ITGB3	1350 (17)
IL2RB	-1.657	transmembrane receptor		1.501	1.43533	0.0367	CCL2,ETS1,FOS,HAVCR2,IL10,IL2RA,IL4,JUN
JAK		group		1.5	8.48017	3.31e-09	BCL2L1,CCL2,CD40,CD83,CDH2,CXCL10,EIF2AK2,FBXO32,HES6,IFI6,IFIH1,IFIT1,IFIT2,IFIT3,IFITM3,IGF1,IL10,IL12B,IL17A,IL6,ISG15,NEUROG3,PTGER2,PTGER4,RSAD2,SOCS1,SOCS2,SOCS3,STAT1,VIM	1343 (16)
PLP1	1.904	other		1.5	2.98716	0.00103	ATF3,CCL2,CCL20,CXCL2,DDIT3,ENPP2,FOXP3,HSPA5,ICOS,IFNG,IL10,IL17A,IL4,MOG,NOTCH1,NOTCH3,SEPTIN4,TIMP1,TNF	1274 (14)
interferon beta-1a		biologic drug		1.499	2.76195	0.00173	AOAH,BIRC2,BUB3,CCR2,CCR5,CCT4,CCT6A,CD4,CHFR,CORO1A,CSF1R,CXCR4,FCGRT,FKBP1A,FYB1,GADD45B,GBP5,GNLY,GPR65,GZMB,HLA-DRB5,IFI35,IFI6,IFIT1,IL1RN,IL2RB,IRF1,IRF7,JAK2,LAMP3,LILRA2,LTB,MAL,MX1,NFKBIA,NMI,NOTCH1,PLAUR,PSME1,S100A9,SERPING1,STAT1,TBCB,TBXAS1,TNFAIP6,TNFRSF1B,TNFSF13B,TRADD	979 (15)
PPP1R15A	1.097	other		1.497	2.00877	0.0098	CCND1,CEBPA,CEBPB,DDIT3,DLG4,GADD45A,HSPA5,IL6,MCL1,TNF,XBP1	1519 (17)
diclofenac		chemical drug		1.494	5.85699	1.39e-06	ABCC4,APP,ATF3,ATF6,CCND1,CDKN1A,CEBPB,CTH,DDIT3,DNAJB6,EIF4A1,EIF4EBP1,FOS,GDF15,HERPUD1,IFNG,IL10,IL1A,IL24,IL2RA,IL6,ITGAM,JAG1,JUN,KCNA3,KLF4,KLF9,LBH,LGALS3,MCL1,MED13L,MID1IP1,MPO,PIK3C2A,PSAT1,SELL,SERPINE1,SOS1,SQSTM1,STC2,TMEM100,TNF,TNFRSF12A,VEGFA,WARS1	1871 (21)
CREM	1.265	transcription regulator		1.494	4.23732	5.79e-05	ABCA1,ACE,ADRB1,ADRB2,ANXA4,APOE,APOLD1,ATF3,BCL2,BTG2,CCNB1,CCND1,CCND2,CD247,CD86,CEBPB,CH25H,CIART,CREM,CSF2,CSRNP1,CXCL8,CYP19A1,CYP51A1,DUSP1,EGR1,EGR2,ERRFI1,FOS,FRMD6,FUT7,GADD45B,GPD2,GPR19,IFNG,IL17A,IL4,INA,IRAK1,JUNB,LOC102724428/SIK1,LORICRIN,LSS,MCL1,MEST,MKNK2,MNS1,MSMO1,NFATC1,NFKBID,NOS1,NOTCH1,NPC2,PCSK1,PDCD1,PDXK,PRL,RHOB,SIAH2,SMC4,SPATA20,STAR,THBS1,TNF,VEGFA	2197 (24)
TREM2	1.904	transmembrane receptor		1.493	8.86967	1.35e-09	ACTR3B,APP,ASPM,AXL,B2M,BAMBI,BCL2,CCL3L3,CCR7,CD36,CD40,CD86,CITED2,CSF1,CTSB,CX3CR1,CXCL2,DCSTAMP,DLG4,FGF2,GRIN2A,HLA-A,IL10,IL12B,IL1A,IL1B,IL6,IRF8,ITGAX,LGALS3,LIPA,LOX,NFKBIA,NINJ2,P2RY12,PPARG,PTK7,SLC32A1,SULF2,SYP,TNF,TNFAIP3,TREM1	1988 (14)
FOS	1.739	transcription regulator		1.491	14.2314	5.87e-15	A2M,ABCB1,ACTG1,AGPS,ALPP,AMIGO1,ANK3,ANXA4,AP3D1,APLN,AQP3,ARNT,ARNTL2,ASAP1,ATF3,B4GALT1,BCL2L11,BDNF,C3,CA2,CADM1,CALU,CAMK2D,CAPN2,CASP4,CCL2,CCL20,CCNA2,CCND1,CCNE1,CCNG1,CD44,CD68,CDON,CERS4,CFP,CHGA,CHI3L1,CLU,CMTM4,COBLL1,COL18A1,COL1A1,COL6A1,CRABP1,CRB3,CREBBP,CSF3,CSTA,CTH,CTNND1,CTSB,CXCL10,CXCL3,CXCL8,CYP17A1,CYP2J2,DAP,DAPK2,DNMT1,EDN1,EGR1,EGR2,ELOVL6,EMB,EPS8,EREG,EZR,FARS2,FBLIM1…	2036 (15)
RBP4	-1.023	other		1.491	1.36957	0.0427	ADCY6,CASP1,CD68,IL1B,IL6,ITGAX,MYH7,NLRP3,RBP1,TLR4,TNF
ethanol		chemical - endogenous mammalian		1.49	5.86012	1.38e-06	ABCA1,ABCG1,ACKR3,ACTA2,ADCY6,ADM,ALOX15B,ALOX5,ARRB2,ATF3,AXIN2,BCL2,BCL2L1,BDNF,BMP4,BRCA1,C5AR1,CAPN5,CBR1,CCL2,CCND1,CD36,CDKN1A,CEBPA,CEBPB,CEBPD,CENPA,CETP,CGAS,CHRNA6,CLU,CNR1,CREB1,CREG1,CXCL12,CXCL3,CXCL8,CXCR4,CYP27A1,CYP7B1,DDIT3,DDR2,DMRT1,DUSP1,E2F1,EDN1,EDNRB,EGFR,EGR1,FAM72A,FGF2,FGFR1,FOS,FOSL1,FOSL2,GABRA4,GADD45A,GAPDH,GCK,GNAI1,GPC5,GPT,GRIN1,GRIN2A,GRK2,GZMB,HAMP,HEY1,HLA-A,HN…	1986 (19)
CSNK2A1	1.046	kinase		1.488	3.67366	0.000212	AHR,BCL2L1,CCND1,DTX1,EOMES,FN1,HES5,HEYL,ITGA3,JUP,KLF2,PRKN,TP63,VIM,ZFP36	1758 (19)
MAF	-4.442	transcription regulator		1.486	2.25885	0.00551	ACSS2,CRYBB1,CRYBB2,CRYBB3,CXCR5,CYP51A1,GCLM,IFNG,IL10,IL12A,IL12B,IL12RB1,IL13,IL17A,IL1R1,IL23R,IL2RA,IL4,LSS,MAFG,MERTK,NQO1,NT5E,NUAK1,PMVK,PRDM1,SCG5,SQLE,VCAM1	1265 (14)
3'-O-(4-benzoyl)benzoyladenosine 5'-triphosphate		chemical reagent		1.486	2.22475	0.00596	IL17A,IL1B,IL6,P2RX7,TNF	1147 (18)
PLA2G10	-1.023	enzyme		1.486	1.74232	0.0181	BMP4,BYSL,CCL2,CCR9,CD36,CD40,CPNE1,DHRS3,ETS2,GATA3,IL10,IL13,IL17A,IL1B,IL4,IL6,KDM6B,KLF2,KLF3,KPNA2,KRT18,KRT8,KRT86,LEF1,LHX2,MKI67,NABP1,NUP35,PTPRC,SLA2,STAR,TCF3,TNF,TRAF4,VEGFA,ZCCHC7
CDK2	-1.243	kinase		1.482	3.28904	0.000514	BARD1,BCL2L11,BRCA1,CCNE1,CD34,CDKN1A,CHEK1,DHFR,E2F1,FOS,GCK,H2AX,MAP2,MT2A,PCYT1A,RAB27A,RB1,RBL1,SFTPA1,TERT,TNF,TNFAIP3,UCP2	1441 (15)
peroxynitrite		chemical toxicant		1.48	2.4437	0.0036	CXCL8,DDIT3,FOS,ICAM1,IDO1,LMO4,LYN,MARCKSL1,NOS3,RGS2,TNF	1776 (22)
2-pentadecyl-2-oxazoline		chemical reagent		1.48	2.39903	0.00399	BDNF,GDNF,IL10,IL1B,IL4,SORT1,TJP1,TNF	1328 (8)
EIF4E	-1.302	translation regulator		1.479	5.85387	1.4e-06	ADAMTS16,ARL11,B2M,BCL2,BCL2L1,BIK,BIRC2,BIRC5,BNIP3,CAPG,CCND1,CCR5,CD274,CDC34,CDKN1A,CDT1,CEBPA,CEBPB,CKS2,CLEC7A,CRADD,CRYBB1,CSF1R,CX3CR1,DEDD2,DLG4,EGFR,EIF4EBP1,EREG,FASTK,FGF2,FGF5,FN1,FOSL1,FOXM1,FREM2,GPR65,HLA-A,HLA-DQB1,HLA-G,IFI16,IFIT2,IFNG,IGFBP4,IL12RB1,IL15RA,IL18,IL1A,INSIG1,LAG3,LAT2,LGALS3BP,MAPKAPK2,MCL1,MDM2,MIA,NFKBIA,NHP2,NLGN2,NOL3,P2RY12,PA2G4,PGF,PHF5A,PLAUR,POLR3D,POMC…	2094 (21)
USP7	-1.241	peptidase		1.479	2.15552	0.00699	ACKR3,BMF,CCND2,CD36,CDKN1A,FOXP3,IL23A,IL6,ITGB7,KLK2,KLK3,MDM2,PDE9A,PPARG,TNF	2324 (21)
CLEC6A	5.472	transmembrane receptor		1.477	1.78781	0.0163	IL10,IL12B,IL1B,IL6,TNF
MAP2K5	1.008	kinase		1.475	2.39577	0.00402	ACSS2,ALDOC,CCND1,CREM,CXCL8,CYP51A1,DHCR7,ELOVL6,FOS,HSD17B7,ID1,INSIG1,JUN,KLF2,LSS,MSMO1,MVD,PMVK,RDH11,SQLE,STARD4,THBS1,TM7SF2	1389 (18)
CADPS	-5.961	other		1.471	2.73993	0.00182	BDNF,CDH2,SCG2,SNAI1,STX6,TJP1	1278 (10)
Ni2+		chemical reagent		1.469	3.67366	0.000212	ANGPTL4,BIRC3,CCL2,CCL20,CSF1,CX3CL1,CXCL2,CXCL3,CXCL8,ICAM1,IL1A,IL6,LTB,PTGES2,VCAM1	1808 (15)
POSTN	-1.023	other		1.468	1.60033	0.0251	ACTA2,ADAMTS4,ALPP,EGFR,FN1,HES1,HEY1,LOX,LOXL2,LOXL3,MEF2C,NOTCH1,PDGFA,PDGFB,RUNX2,TNNI1,TSLP,VIM
Pdgf (complex)		complex		1.467	4.22768	5.92e-05	AKT1,BCL2,CAV1,CCL2,CCND1,CCND2,CD44,CDK6,CDKN1A,CDKN2B,CXCL3,EDN1,EGFR,EGR1,EIF4E,ERRFI1,FAM189B,FGF2,FN1,FOS,FOXO1,HEY1,ICAM1,IL13,ITGA5,ITGB3,JAG1,JUN,JUNB,MCM6,MCM7,mir-221,NOTCH1,NOTCH3,PLAU,PLAUR,PPARG,SERPINE1,SV2A,TERT,TGFB3,THBD,TIMP1,VCAM1,VEGFA	2007 (19)
ULBP1	2.025	transmembrane receptor		1.463	4.63264	2.33e-05	CCL4,CD69,CD83,HLA-A,IFNG,IL2RA,TNF,TNFRSF9	1369 (12)
TNFRSF17	-1.029	transmembrane receptor		1.463	3.21112	0.000615	BCL2,BCL2L1,CD40,CD80,CD86,CSF2,ICAM1,TNFRSF13B	1090 (14)
NAMPT	1.623	cytokine		1.462	2.52288	0.003	ALDH5A1,ALDH8A1,ATXN10,AXIN2,AXL,BDNF,BLVRA,CCL20,CCR3,CD68,CXCL10,CXCL2,CXCL8,E2F2,EHHADH,EPHA2,FN1,GDF15,HADH,HSD17B11,HSD17B6,HSD3B7,ID1,IL6,ITGB1,JUN,KMO,LEF1,LIPE,MITF,NAMPT,PDGFRB,PECAM1,PEG10,SOCS2,TFAP2A,TFPI,TMSB15A,TNF,WNT3,WNT5A	1613 (16)
ethionine		chemical toxicant		1.462	2.07727	0.00837	ANXA1,C4A/C4B,CD44,CLU,GCGR,GPNMB,IER3,LAMC2,LGALS3,MCM3,PLA1A,S100A10,S100A11,TIMP1,TMSB10/TMSB4X,TNF,TNFRSF12A,UPP1
PBRM1	-1.068	other		1.461	4.65561	2.21e-05	CCNB1,CCNB2,CD274,CDK1,CDKN1A,CENPE,CENPF,CXCL10,FOXP3,IGFBP4,IL6,MDM2,PLK1,S100A13
GNA12	-1.614	enzyme		1.461	2.27246	0.00534	ACTA2,BCL2,BRAF,CCNA2,CNN1,CXCL8,DDR2,EGFR,EZR,F2R,FOS,GCLC,GCLM,GNA13,IRS1,ITGA6,ITGAE,JAK1,LAMB3,MYH11,NOS3,PDGFA,PDGFRA,PIK3R1,PXN,RRAS2,SOS1,TXNRD1,VAV3,VCL,VEGFA,VIM	1863 (19)
TIFA	1.009	other		1.46	5.75203	1.77e-06	BCL2,BCL2L1,CASP1,CCL2,CSF2,CXCL10,CXCL3,CXCL8,HAMP,ICAM1,IL6,NFKBIA,TNFAIP3	1590 (13)
PARP14	-1.021	enzyme		1.457	1.35754	0.0439	CCND1,CXCL10,FCER2,ID3,ISG15,MCL1
ZBTB16	1.131	transcription regulator		1.456	11.3747	4.22e-12	ABO,ACER2,AGPAT4,ALPP,ATP6V1A,AURKC,B4GALNT1,BACH2,BCL6,CCNA2,CCND1,CCR2,CD180,CD200R1,CD274,CD34,CD38,CD40,CD44,CD55,CD81,CD83,CD86,CDKN1A,COL1A1,CSF2,CSGALNACT1,CXCL10,CXCR3,DHRS3,DNMT1,DTX1,EGR2,EIF2AK2,EMB,EYA2,F13A1,F2R,FGFR3,FOXO1,GALE,GALNT6,GATA3,GBE1,HPSE,ICOS,ICOSLG/LOC102723996,ID2,ID3,IDO2,IFNGR1,IL10RA,IL12B,IL12RB1,IL13,IL17A,IL17RB,IL18R1,IL18RAP,IL1A,IL23R,IL2RA,IL4,IL4R,IL6,IL6ST…	2062 (22)
PCSK9	2.751	peptidase		1.455	1.50585	0.0312	ANXA1,CD9,ICAM1,IFITM3,IL1B,IL6,IRF7,ISG15,OLR1,SQSTM1,TLR2
HSPD1	-1.351	enzyme		1.453	2.44612	0.00358	CXCL2,CXCL3,EHHADH,GATA3,ICAM1,IFNG,IL10,IL12A,IL12B,IL15,IL1B,IL6,SOCS3,TBX21,TNF,VCAM1	1059 (16)
CCR5	9.205	G-protein coupled receptor		1.451	3.22841	0.000591	CCL3,CCL3L3,CCL4,CCR5,CD9,CXCL10,CXCL12,CXCL2,CXCL3,FOS,IFNG,IL10,IL12B,IL17A,IL1B,IL23A,IL4,IL6,TNF,TNFRSF1A,TNFRSF1B	1600 (16)
PTGIS	-1.023	enzyme		1.449	3.08938	0.000814	CXCL2,CXCL3,CXCR2,DDIT3,ICAM1,IL1B,IL6,NOS1,PECAM1,PTGES,TNF,VEGFA	2015 (19)
Hsp27		group		1.444	1.50585	0.0312	BCL2,CCND1,CD1A,CD274,CD86,CDKN1A,CSF1,CSF1R,CXCL8,EIF4EBP1,FBXO32,FOS,GCH1,IL10,IL6,IL6R,KLK3,STAT3,TMPRSS2
prodigiosin		chemical toxicant		1.438	3.79588	0.00016	BBC3,BCL2,CDKN1A,DDIT3,HSPA5,IL2RA,TNFRSF10B,TP73	1846 (19)
CDC42	1.119	enzyme		1.437	3.71444	0.000193	ATF3,BCL2L11,CCND1,CCNE1,CD86,COL2A1,EPS8,FOS,IFNG,IL1B,ITGB1,JUN,MYH7,PRL,SOX5,SOX9,STAT3,TGM2,TNF,UBE2C	1095 (15)
lithium chloride		chemical drug		1.436	4.5784	2.64e-05	AHR,APP,AR,ASS1,AXIN2,B4GALT1,BCL2,BCL3,BMP4,CCND1,CD4,CD44,CDC25C,CDKN1A,CEMIP2,CTAGE9 (includes others),CYP51A1,DLL4,ENAM,FOS,FSCN1,GATA3,GATA4,GDF15,GDNF,GFI1,HES1,HES7,HEYL,IDS,IL10,KLK3,LEF1,LSS,MAPK10,MT2A,MTHFR,MYB,MYH11,MYLK,NES,NKD2,NKX2-5,NOTCH1,NOTCH3,PLD1,POMC,POU5F1,PPARG,PXN,SNAI1,SOX9,TERT,TNFRSF10B,TNFSF10,VCAN	1811 (16)
astressin 2B		biologic drug		1.432	2.09745	0.00799	CXCL2,DLG4,FOS,KCNMA1,KCNMB1,SLC2A3,SYN1,VEGFA	1651 (17)
2-mercaptoethanol		chemical - endogenous mammalian		1.432	1.78781	0.0163	ATF3,HERPUD1,HSPA5,IDO1,KIF3C
FUT7	-2.536	enzyme		1.432	1.78781	0.0163	CD24,GLG1,IL10,IL23A,SELPLG
PPP2CA	-1.093	phosphatase		1.426	6.17457	6.69e-07	AHR,BCL2,BCL2L11,CASP1,CCND1,CD36,CD69,CDKN1A,CXCL10,CXCL3,DNMT1,EIF4EBP1,FOXP3,HCAR2,ICOS,IL10,IL17A,IL1A,IL23R,IL2RA,IL2RB,IRF1,IRF7,MYL4,NCKAP1,NOVA1,NT5E,PTPRC,SELL,SLAMF8,SOCS1,SOCS3,STAT1,TIGIT,TNF,UPP1	1076 (14)
KPNA2	-1.269	other		1.426	2.82681	0.00149	BMP6,CAPN2,COL6A2,IFIT1,ISG15,ITGA6,LOXL2,PGF,SNAI1	686 (7)
LAMA5	-1.406	other		1.426	1.75449	0.0176	CCL3L3,CCL4,CCR1,CSF3,CXCL10,CXCL3,STAT1,TNF,TNFRSF1B
daporinad		chemical drug		1.424	8.48017	3.31e-09	ASPM,AXIN2,BHLHE41,BRCA1,BRIP1,CCL2,CCR1,CD274,CD44,CEBPB,E2F2,ETS2,ID1,IL12B,IL1B,IL6,LIF,LMNB1,MCM10,NAMPT,NES,NRF1,RCAN1,SERPINE1,SOX2,TNF,TNFSF11,TRIP13,VDR,ZNF488	1256 (15)
IL1RAP	-1.984	transmembrane receptor		1.424	2.32698	0.00471	CCL20,CD40,CSF2,CXCL10,CXCL8,IL13,IL17RB,IL4,IL6,TNF	1186 (13)
gemfibrozil		chemical drug		1.422	1.36051	0.0436	ACADVL,ACOT2,APOE,APP,CCND1,CHEK1,DECR2,ECH1,EHHADH,FOXP3,FURIN,GADD45A,GDNF,IL1B,IL4,IL6,MOG,NFKBIA,PLEKHB1,PPARD,PPARG,SCD,SERPINE1,SOCS3,TNF,TPP1
POU2AF1	-1.09	transcription regulator		1.417	3.95078	0.000112	AICDA,B4GALT1,BCL2,BCL2L1,BCL6,BTLA,CCR5,CD69,CD83,CD86,CXCR4,CXCR5,FOXO1,HMGB2,ID3,IFI44,IFI44L,IFIT3,IFITM1,IL4R,IL6,IRF8,LCK,LEF1,MCL1,MEF2B,MS4A6A,MX1,NFKB2,PLCG1,PRDM1,PTPRS,RBP1,RRM2B,S100A10,SPI1,SPIB,TNFRSF13C,UNG	1807 (18)
EBF4	3.362	transcription regulator		1.417	3.21112	0.000615	CDKN1A,EOMES,GZMK,IL2RB,JAK3,KLRD1,NKG7,TBX21
NOX4	1.904	enzyme		1.415	2.38405	0.00413	ACTA2,BCL2L1,BCL2L11,BMF,CCL2,CD44,CDKN1A,COL1A1,CTH,CXCL8,FN1,GCLC,H2AX,ICAM1,MCL1,NCF1,NOS3,PDK1,POU5F1,RHOC,SERPINE1,TJP1,VEGFA,VIM	1464 (16)
vanadyl sulfate		chemical reagent		1.414	2.8962	0.00127	GCLC,IL1B,IL1R2,IL1RN,IL6	593 (7)
Nkx2-2os		other		1.413	2.21183	0.00614	CCND1,CHGB,CLDN11,DISP2,NEUROG3,NNAT,PAX6,PCSK1N,SCG5
saracatinib		chemical drug		1.413	1.46725	0.0341	ID1,IL10,IL1B,NLRP3,SRC
VAV		group		1.411	2.22475	0.00596	CD69,IL10,IL4,STAT3,TNF	1264 (16)
clenbuterol		chemical drug		1.411	2.09098	0.00811	ADRB2,BCL2L1,FBXO32,IFNG,IL10,IL1B,IL1RN,SOCS3,TNFSF11,VDR	1426 (17)
miR-486-5p (and other miRNAs w/seed CCUGUAC)		mature microRNA		1.411	1.88273	0.0131	ADARB1,AFF3,CREBL2,DCBLD2,FOXO1,FOXP1,SLC10A7,SLC4A8,UBASH3B,WDFY3
PKM	1.152	kinase		1.41	1.9393	0.0115	ABCA1,ABCG1,BCL2L1,CCND1,CD274,CD36,CD40,CD86,CDH2,EGR1,ERBB2,FBP1,GAPDH,H2AX,HGF,IFNG,IL18,IL1B,IL6,ITGB1,LGALS9,LSS,MKI67,MLYCD,MPO,NCR1,NFE2L1,PC,PDK1,PTK2,STAT3,TGM2,TNF,TP53RK
vemurafenib		chemical drug		1.408	5.11862	7.61e-06	BIRC5,CD274,CXCL8,DDR2,GPNMB,GZMB,HAVCR2,ID2,IL10,IL1B,IL6,MITF,NAMPT,PDCD1,PMEL,PRKN,SEPTIN4,SOX2,SPRY2,TNFRSF10B,VEGFA	1962 (17)
CD244	1.051	transmembrane receptor		1.408	4.32975	4.68e-05	CCL3,CCL3L3,CCL4,CSF2,CXCL8,EGR1,FOS,IFNG,TNF	1460 (18)
L-glutamic acid		chemical - endogenous mammalian		1.406	2.81248	0.00154	ABCG2,ACTA2,APP,B2M,BAG3,BCL2,BCL2L1,BCL2L11,BDNF,CCND1,CCNE1,CDH2,CDKN1A,CETN2,CIDEC,CYP2C18,EGR1,FADS1,FGF2,FMR1,FOS,GADD45B,GRIN1,GRIN2A,HOMER1,IL18,IL1B,INSIG1,JUN,JUNB,LIF,MAL,MAP1B,MAP2,MITF,MSMO1,NOS1,PLA2G4A,POMC,PTMA,ROCK2,RUNX2,SCD,SELENOP,SLC1A1,SLC1A3,SLC27A1,SORBS1,SQLE,TAP1,TIMP1,TJP1,TNF	2123 (19)
MFAP2	-1.023	other		1.406	1.78781	0.0163	CDC42EP3,ITGA4,ITGB3,TNFSF11,VCAN
finasteride		chemical drug		1.406	1.6968	0.0201	AR,BCL2,CLU,EDN1,FLT1,FOS,IL24,IL6,TGFB3,VEGFA
ADCY		group		1.405	1.95078	0.0112	CDH2,CDKN1A,CREM,CRYM,CYP1B1,FGF2,FOS,IL1B,IL6,NFATC1,POMC,TNF
MOG	19.428	other		1.403	6.20551	6.23e-07	BDNF,C5AR1,CCL3L3,CCR1,CCR2,CCR5,CD274,CD40,CD44,CD80,CD86,CIITA,CSF2,CXCL10,CXCL2,FOXP3,GDNF,ICAM1,IFNG,IGF1,IL10,IL13,IL17A,IL23A,IL27,IL4,IL6,MKI67,PDCD1,PECAM1,TNF,VCAM1	1425 (13)
ATP		chemical - endogenous mammalian		1.4	9.85387	1.4e-10	ACTA2,AHR,BCL2L11,BDNF,BIRC5,CAPN2,CASP1,CASR,CCL4,CCND1,CCR5,CCR7,CD200,CD83,CD86,CXCL10,CXCL2,CXCL3,CXCL8,CXCR4,DLG4,DUSP1,EIF2AK2,FOS,FOXO1,FOXP3,GCLC,GCLM,GRIN2A,H2AX,HBEGF,ICAM1,IFNG,IL10,IL12B,IL18,IL1B,IL1RN,IL23A,IL27,IL2RA,IL6,ITGA4,ITGAM,NFATC1,NLRP3,NOS1,NOS3,P2RX7,PADI4,PAX6,PLD2,PTGES2,SAT1,SELL,SERPINE1,SOX9,SPHK1,THBS1,TLR4,TNF,TNFRSF1B,TNFSF11,TRPV1,TSLP,TUBB3,VCAM1	1652 (15)
ADRA1B	4.401	G-protein coupled receptor		1.4	3.40782	0.000391	ADRA1D,BDNF,CCND1,CDKN1A,CEBPB,CEBPD,CREM,DUSP1,EGR1,EGR2,FN1,FOS,IL6,IL6ST,JUN,LIF,LOX,MYLPF,NFIX,PAK1,PPP3CA,PRRX1,TMPO,VEGFA	1673 (17)
PELI2	-1.688	enzyme		1.4	2.8962	0.00127	CXCL2,CXCL8,IL1B,IL6,TNF	1080 (18)
PNPLA7	1.906	enzyme		1.4	1.78781	0.0163	CCR1,IL12B,IL6,NAMPT,TNF
DLG1	-1.046	kinase		1.399	1.35754	0.0439	IFNG,IL12B,IL6,KCNA3,KCNJ2,TNF
SN-38		biologic drug		1.396	2.36351	0.00433	BCL2L1,BIRC2,BIRC3,BMP6,CCL20,CCNB1,CDKN1A,CHEK2,CLU,EGFR,ERBB2,GDF15,H2AX,IL1A,MCL1,NAMPT,TNFRSF10B,TTK	1787 (15)
ADIPOQ	-1.494	other		1.395	1.70997	0.0195	ACACB,ACSL1,ACTA2,APOC2,APOM,BCL2,BCL3,BIRC5,CASP6,CCL2,CCL20,CCND1,CD36,CDKN1A,CEBPA,CEBPB,CMKLR1,CXCL10,CXCL2,CXCL3,CXCL8,CXCL9,CYP19A1,CYP1B1,DUSP1,EGR1,ESR2,FGFR1,FGFR3,FN1,FOS,FOXP3,FZD1,FZD2,FZD3,FZD4,GCK,GPD1,HBEGF,ICAM1,IFNG,IGFBP4,IL10,IL12A,IL12B,IL13,IL17A,IL18,IL1B,IL4,IL4R,IL6,IRS1,LRP6,NCF1,NCF4,NFKBIA,NRF1,PPARA,PPARD,PPARG,PTK2B,RUNX2,SCD,SIGLEC10,SLC27A1,SLC27A2,SLC2A3,SOCS3,SPI1…
DAB2IP	-1.208	other		1.392	1.35754	0.0439	CD44,CDKN1A,CLU,EGR1,TTK,VIM
P2RY12	-2.434	G-protein coupled receptor		1.387	2.8962	0.00127	CCL4,COL1A1,HAMP,IL1B,IL6	1245 (16)
mir-149		microRNA		1.387	2.8962	0.00127	AKT1,E2F1,GIT1,IL6,TNF	1634 (12)
amiodarone		chemical drug		1.387	2.68825	0.00205	AK4,ASAH1,CXCL8,CYP1A1,GRN,HSPD1,ICAM1,LSS,ME1,MYH6,MYH7,PPARA,PPARG,SCD,SLC2A3,SLCO2B1,TNF,WIPI1	1455 (20)
CCL1	5.969	cytokine		1.387	2.39903	0.00399	CCL3,CCR8,ELK1,GRIN1,IL17A,IL6,ITGA2,SERPINE1	849 (10)
LINC00842	-9.348	other		1.387	2.22475	0.00596	CDH2,FN1,SERPINE1,SNAI1,VIM	1249 (17)
IFITM3	-2.17	other		1.387	2.22475	0.00596	APP,IL10,IL12A,IL4,TNF	1672 (11)
ADAM19	2.765	peptidase		1.387	2.22475	0.00596	ACTA2,COL1A1,EGR2,FN1,NOTCH1	1555 (11)
CCAR1	-1.048	transcription regulator		1.387	2.22475	0.00596	CEBPA,CEBPD,PPARG,RGS2,SPHK1	1398 (7)
lidocaine		chemical drug		1.387	1.98716	0.0103	APP,BCL2,BCL2L1,FOS,GATA3,HMGB1,IL6
SDC4	10.138	other		1.387	1.78781	0.0163	ANGPT2,IL1B,KLF2,KLF4,SOX9
tosyllysine chloromethyl ketone		chemical - protease inhibitor		1.387	1.46725	0.0341	CCR2,CYP1A1,IRF1,NFKBIA,SPN
sulforafan		chemical drug		1.385	8.43652	3.66e-09	ABCB1,ABCG2,AGAP1,AKR1B1,AKR1C1/AKR1C2,ALDH1L2,ARHGAP5,ARID5B,BCL2,BCL2L1,BIRC5,CAND2,CCL2,CCNB1,CCND1,CCNE2,CD44,CDC25B,CDC25C,CDK6,CDKN1A,CIC,CRYZ,CSF1R,CXCL8,CYP1A1,DNMT1,DNMT3A,EFNB2,ENPEP,ERBB3,FOS,GABARAP,GABPB1,GATA3,GBE1,GCLC,GCLM,GNAQ,GOLGA4,GPX1,GSTA4,GSTM1,GSTT2/GSTT2B,GZMH,HBEGF,HDAC1,HIPK2,HLA-A,HTR3A,ICAM1,IFNG,IGF2R,IL12A,IL12B,IL17A,IL1B,IL23A,IL4,IL6,IL6R,IL6ST,KRT5,LAMC1,LIPE,LO…	1457 (16)
KDM4D	1.609	enzyme		1.385	2.82681	0.00149	BCL2,CCL22,CCND1,CD274,CDKN1A,EPCAM,GLI1,IL12B,SOX9
ALK	1.143	kinase		1.38	3.94692	0.000113	AGRN,AKR1C1/AKR1C2,BCL2L1,CCND2,CD274,CDH2,CDKN2B,DLX1,DTNA,EGR2,EGR3,FOS,FOXP3,GLI1,HOMER3,IL10,METRN,NPAS4,NTRK2,PITX2,POU5F1,PRAME,S100A11,SERPINE1,SNAI1,SOX2,STMN4,TCEAL7,TNFRSF8,USP18	1899 (19)
PRNP	1.418	other		1.379	5.11014	7.76e-06	ABCB1,AHR,APOE,APP,BCL2,CCL2,CCND1,CD44,CSGALNACT1,CTSD,DLG4,EGR1,EPS8,ETS2,FOSL1,H2AX,HSP90B1,HSPA5,HSPA8,ID2,IFNG,IL10,IL13,IL17A,IL1B,IL6,IRS1,LAMP2,LRP1,MDM2,NFKBIA,NOTCH1,PDIA3,PLAUR,PRNP,SOX9,SYP,TCF7L2,TLE1,TNF	1880 (17)
CD80	1.393	transmembrane receptor		1.377	3.22841	0.000591	BCL2L1,CBLB,CD27,CD28,CD69,CSF2,ICAM1,ICOS,IDO1,IFNG,IL10,IL1B,IL2RA,IL2RB,IL4,IL6,PDCD1,TBX21,TNF,TNFRSF9,TSC22D3	1524 (20)
ETV1	-10.176	transcription regulator		1.376	6.98716	1.03e-07	ADRB2,BRCA1,CCL2,CXCR4,E2F1,ERBB2,HPSE,HSD17B7,IL23A,IL36A,IL7,ITGB3,MITF,MMP7,PLAUR,POMC,SOX9,TERT,TMPRSS2,TNFSF4,VIM,WWTR1	728 (7)
NOTCH2	-2.591	transcription regulator		1.373	2.8729	0.00134	ACTA2,BCL2,CNN1,COL1A1,DTX1,EPCAM,FCER2,FN1,HES1,HES5,HEY1,IL10,IL1RL2,IL6,IL7R,MYH11,NOTCH2,PDGFA,PRAG1,RBPJ,RGS5,SOX9,STAR,TNF,TNFSF11,TSPAN33	1341 (18)
KDM3B	-1.137	enzyme		1.372	7.74473	1.8e-08	ABCA12,ANKRD13A,APOD,AXIN2,C1R,CDC20,CDH26,CIT,CKAP2,CMBL,COLEC12,CORO1C,DEGS2,DEPDC1,DLGAP5,EFNB2,FKBP1A,FN1,FRMD4B,GALNT2,GTSE1,HJURP,IGF1,IRS1,KALRN,KIF18B,KNL1,MB,MYLK,NCAPG,NEDD4L,NOTCH3,OPRK1,PPP3CA,RACGAP1,RDH11,SDCBP2,SLC44A1,STMN1,TSPAN7,TXNDC16,ZSCAN18
Calcineurin B		group		1.372	1.78781	0.0163	CCR5,CDKN1A,CXCR3,ICOS,LORICRIN
FBXO32	-1.713	enzyme		1.366	6.97469	1.06e-07	ABCC4,ALG12,AXIN2,BCL2L11,BHLHA15,CADM1,CALR,CCL20,CCND2,CKMT1A/CKMT1B,CSF2,CXCL2,CXCL3,DNAJB9,DNAJC3,ERP44,GADD45A,GCLC,GMPPB,HERPUD1,HOOK1,HSPA5,HYOU1,IL1B,IL1R1,IL6,ISYNA1,ITGA3,LEF1,MYH6,OAT,PDIA3,PPP3CA,PRKCZ,PSEN2,PTGES,RAB27A,RPN1,SELENOS,SERP1,SERPINB2,SLC33A1,STT3A,TFPI2,XBP1
RTKN	1.857	other		1.364	3.79588	0.00016	BCL2A1,BCL2L1,BIRC3,CDH2,FOS,TNF,TNFAIP3,VIM	1533 (11)
QRFP	2.222	other		1.362	1.78781	0.0163	ACSL1,CD36,CEBPA,PPARG,SLC27A1
ANO1	1.864	ion channel		1.362	1.46725	0.0341	ACTA2,EGFR,NES,NOTCH1,SOX2
SOX9	-1.832	transcription regulator		1.359	6.43415	3.68e-07	ADGRA3,AR,CD274,CDH2,CDKN1A,CELSR2,COL1A1,COL2A1,CREB3L2,CXCR4,DLL4,FN1,FOS,FOXC1,FZD2,GAS7,HES1,HEY1,IL13,IL17A,IL6,ITGB8,KLF4,KLK3,LHX2,LRP6,MIA,MITF,MMP7,MSRB3,MYH11,MYLK,NFATC1,NFATC4,NR5A1,OSR2,PAQR6,PDGFA,PHYHIP,POU5F1,PPARG,PRKCA,RBPJ,RUNX2,S100A3,S100A4,SDK2,SMPD3,SOX2,SOX5,SOX8,SOX9,SULF2,TCF7L2,TEAD4,THBS2,VEGFA,VNN1,WNT11,WNT3,WWP2	2072 (23)
TBX21	13.128	transcription regulator		1.355	9.16178	6.89e-10	CCL2,CCL3L3,CCL4,CCR5,CD38,CDK6,CX3CR1,CXCL10,CXCL9,CXCR3,CXCR5,EOMES,GATA3,GZMB,HAVCR2,ICOS,IFNG,IL12RB1,IL12RB2,IL13,IL17A,IL18,IL18RAP,IL23R,IL2RB,IL4,IL6R,IL6ST,IL7R,ITGAE,ITK,KLRD1,LAG3,NKG7,PDCD1,PRDM1,PTGER4,RUNX1,SELL,SELPLG,STAT4,TBX21,TNF,TNFSF11,ZBTB7A,ZEB2	1805 (19)
EREG	3.544	growth factor		1.354	2.09098	0.00811	CXCL3,EREG,FGF2,HBEGF,IL12B,IL18,IL6,PGF,TNF,TNFAIP6	2018 (19)
14,15-epoxyeicosatrienoic acid		chemical - endogenous mammalian		1.353	2.32698	0.00471	CD44,CD82,EGFR,FGF2,NME1,PIK3CG,PLAT,SLC5A2,TNFRSF11B,TNFSF11	2085 (17)
P2RY2	-1.068	G-protein coupled receptor		1.353	1.63078	0.0234	ACHE,BCL2L1,CCND1,CDKN1A,CXCL8,GAP43,ICAM1,JUN,PTGES2,SERPINE1,SESN2,VCAM1
IL24	4.246	cytokine		1.351	4.00568	9.87e-05	BCL2,BCL2L1,BCL2L11,BCL6,CASP12,CCL20,CCND1,CXCL8,DDIT3,EIF2AK2,FOXP3,GADD45A,HBEGF,HSP90B1,HSPA5,IFNG,IL10,IL12A,IL12B,IL23A,IL24,IL27,LIG4,MCL1,PRDM1,XBP1	1603 (12)
RELB	1.179	transcription regulator		1.35	6.12321	7.53e-07	ABCB1,ANXA5,B2M,BCL2,BCL2L1,BIRC3,CCL19,CCL20,CCND1,CCR3,CD40,CDKN1A,CHI3L1,CIITA,CSF2,CXCL12,CXCL13,CXCL8,ENPP2,ICOSLG/LOC102723996,IFNG,IL10,IL1B,IL4,IL6,LTA,LTB,LTBR,MARCKSL1,MPO,MYB,NFKB2,NFKBIA,PRDM1,STAT4,TBX21,TNF,TNFAIP2,TNFRSF14,TNFRSF1A,TNFSF14	1240 (15)
WNT3A	-1.992	cytokine		1.349	13.2741	5.32e-14	ACADVL,ACTA2,ADAMTS4,ADM2,AHR,ALPK2,APP,AQP3,ARHGAP18,ARRDC4,ATF6,ATP1B1,AXIN2,BBC3,BCL2,BCL2L11,BCL9L,BCS1L,BDNF,BMP4,CALR,CAVIN4,CCDC80,CCL2,CCL22,CCL3L3,CCND1,CCND2,CD274,CD44,CD68,CDH2,CEBPA,CEBPB,CEMIP2,CLEC11A,COL1A1,COL2A1,COLEC12,CPT1B,CTH,CXCL10,CXCL12,CXCL2,CXCL3,DCUN1D3,DNAJC6,DVL1,EDN1,EFNB1,EGR2,ENG,EOMES,ERBB3,ETV5,FCMR,FGF18,FGF5,FHL2,FHOD3,FN1,FOXM1,FZD1,FZD2,FZD4,GAP43,GATA4,GDNF…	1878 (16)
FGF4	-2.457	growth factor		1.349	1.78252	0.0165	CD68,CDKN1A,CSF3,DNMT1,FOS,FOXO1,FOXO4,JAG1,MSX1,PRL,SCD,VEGFA
IFNL2	-2.798	other		1.348	1.62342	0.0238	CCR5,CD4,CXCL10,CXCR4,IFIT1,IRF7,MX1,RSAD2
MAP2K4	1.025	kinase		1.347	6.66354	2.17e-07	ATF2,ATF3,BCL2,BCL2L1,BIRC3,BIRC5,CCND1,CD44,CD86,CDKN1A,CXCL10,CXCL8,EGFR,ERRFI1,FOS,GADD45A,IL12B,IL6,JUN,MAPK9,MDM2,MEF2C,MYH7,PAK1,PLA2G4A,PLAU,PPARD,PPARG,PRDX1,ROCK2,STAT3,TNF,TUBB2A,VDR	1599 (14)
dexamethasone phosphate		chemical drug		1.343	3.67366	0.000212	BCL6,CXCR4,DUSP1,ERRFI1,GPD1,HES5,ID3,IL1B,IL6,NFKBIA,PLEKHF1,SGK1,SOX9,THBS1,TNFRSF11B	1398 (7)
citarinostat		chemical drug		1.343	2.15552	0.00699	AEN,BTG1,CISH,COA7,FILIP1L,FZD2,ICOSLG/LOC102723996,IFIT3,LIF,NEDD9,PHLDA2,RCAN1,TNFRSF12A,TSC22D3,ZYX
CCRL2	1.63	G-protein coupled receptor		1.342	2.8962	0.00127	CD274,CD80,CD86,CXCR2,ITGAX	1284 (14)
CREB3L4	1.211	transcription regulator		1.342	2.8962	0.00127	ANG,ANKH,AQP9,ID2,KDELR3
TDP2	-1.078	transcription regulator		1.342	2.8962	0.00127	KCND2,KLK2,KLK3,SYT1,TMPRSS2
SH2D5	1.549	other		1.342	2.73993	0.00182	BCL2L1,BIRC5,CCND1,IL6,MCL1,SH2D5	1004 (8)
benzyladenine		chemical - endogenous non-mammalian		1.342	2.22475	0.00596	GATA3,IFNG,IL10,IL4,TBX21
CLEC4D	3.441	other		1.342	2.22475	0.00596	IL12B,IL17A,IL1B,IL6,TNF	1168 (14)
ASF1A	-1.224	other		1.342	1.88273	0.0131	CCNA2,PAX6,POU5F1,SOX2,TBX6,VCAM1
dacarbazine		chemical drug		1.342	1.78781	0.0163	CDKN1A,CXCL10,CXCL8,CXCL9,VEGFA
DDP-38003		chemical reagent		1.342	1.78781	0.0163	ICAM1,IFI16,IRF8,ITGAM,LY86
CYP46A1	2.136	enzyme		1.342	1.78781	0.0163	DLG4,GRIN1,GRIN2A,SYN1,SYP
CLEC2A	-1.023	other		1.342	1.78781	0.0163	BCL2L1,CCL3,CCL4,CSF2,CXCL10
COTI-2		chemical drug		1.342	1.46725	0.0341	CCNB1,CDK1,CHEK1,MCL1,PLK1
mechlorethamine		chemical drug		1.342	1.46725	0.0341	ATF3,CA2,CD40,ID2,IL1B
Y-320		chemical reagent		1.342	1.46725	0.0341	CXCL10,CXCL2,CXCL3,CXCL8,DMD
CCL-34		chemical reagent		1.342	1.46725	0.0341	CD4,CXCL10,IFNG,ITGAM,ITGAX
Lefty		group		1.342	1.46725	0.0341	CDC25C,CDKN1A,ETS1,FOXO1,PRL
PPARA	1.273	ligand-dependent nuclear receptor		1.339	5.2426	5.72e-06	ABCA1,ABCB11,ABCB4,ACADVL,ACAT1,ACOT2,ACSL1,ACSS2,ADTRP,AHCY,ANGPTL4,ANXA2,APOC2,APOE,APOM,APP,AQP3,AQP9,ARHGDIA,ASS1,AURKA,BCL2,BCL2L1,BDNF,C1R,C1S,C3,CCNA2,CCNB1,CCND1,CCNE1,CD36,CDK1,CDKN1A,CDKN2C,CEACAM1,CEBPA,CEBPB,CEBPD,CES3,CHAF1B,CIDEC,CPT1B,CROT,CTH,CXCL12,CYP1A1,CYP27A1,CYP51A1,CYP7B1,DECR2,DHCR7,DLG4,ECH1,ECI2,EDN1,EHHADH,ELOVL5,ELOVL6,ENDOG,ETHE1,F11R,FADS1,FOS,G0S2,GCK,GDNF,GLS,GLUL,…	1470 (19)
WWTR1-CAMTA1		fusion gene/product		1.339	2.21396	0.00611	ATF3,BST1,CEBPD,CXCL2,PDGFA,S100A6,SERPINE1,TEAD1,TMEM37,TOP2A,VEGFA
IPMK	1.218	kinase		1.338	3.9393	0.000115	ACTA2,AHR,CCR2,CORO1A,CXCR3,FGL2,FOS,ICOS,IFNG,IL10,IL18,ITGA3,ITGAE,ITGB1,ITGB3,ITGB8,JUN,JUNB,LAG3,MYL9,NT5E,PDCD1,PDLIM5,PRDM1,SATB1,TAGLN2,TNF	1559 (22)
ERN2	1.35	kinase		1.338	2.8962	0.00127	DDIT3,HSPA5,ICAM1,MTHFR,XBP1	1057 (13)
n-3 fatty acids		chemical drug		1.338	2.54668	0.00284	ALOX15B,ALOX5,CBS/LOC102724560,CCL2,ELOVL6,FADS1,GNMT,HSPA5,IL1B,IL6,IRS1,MTHFR,PDGFA,PDGFB,PEMT,PIK3R1,PPARA,PPARG,PTGS1,SCD,SDC1,TNF	1698 (23)
ITGAM	1.467	transmembrane receptor		1.337	3.9431	0.000114	APOE,BCL2A1,C5AR1,CCL3,CCL3L3,CCL4,CD28,CD80,CD86,CXCL10,CXCL8,GSTM3,IL10,IL12A,IL12B,IL1B,IL6,TIMP1,TNF,ZBP1	972 (14)
particulate matter		chemical reagent		1.331	2.21183	0.00614	AHR,IL10,IL6,KLF2,TFPI,THBD,TMPRSS2,TNF,TSLP	1105 (13)
monophosphoryl lipid A		chemical drug		1.33	4.65561	2.21e-05	APP,CD80,CD86,CXCL10,IFNG,IL10,IL12B,IL1A,IL1B,IL1RN,IL6,TNF	982 (13)
PDX1	-1.209	transcription regulator		1.329	4.66555	2.16e-05	ACTG1,AKR1B1,ANXA2,ARRDC4,ATF3,ATF5,BBC3,CAMK2N1,CCND1,CD44,CHGB,CKB,CKMT1A/CKMT1B,COL1A1,CRELD2,CREM,CROT,CX3CL1,CXCL2,CXCR4,DUSP5,ECH1,EFNA1,EGR1,EIF4EBP1,EPHB1,ERO1B,FBXL17,FFAR1,FGF2,FGF5,FGFR1,GALNT18,GAP43,GCH1,GCK,GCLM,GNG12,GRN,HSPA5,ID1,ID2,ID3,IDH1,IER3,IL1B,IL6,INSIG1,JUN,JUNB,KLF10,KLF6,KRT18,KRT8,LTA4H,MAN1A1,MAP2,MITF,NEUROG3,NNAT,NQO1,PAPSS2,PAX6,PC,PCSK1,PDE4B,PDIA4,PPP2R2C,PTP4A1…	2312 (23)
RTN4	-1.146	other		1.329	1.36957	0.0427	APP,ARHGDIA,BDNF,CFL1,DPYSL2,GAP43,IL12B,IL6,IMPACT,INA,JUN,LAP3,MAP2,MAPRE3,NQO1,PEA15,RHOB,STAT1,TRPV1,TSPAN2,TUBB4A,VEGFA
fenofibrate		chemical drug		1.325	4.29671	5.05e-05	ABCB4,ACACB,ACADVL,ACAT1,ACOT2,ACSL1,ANGPTL4,APOC2,APP,AR,ATP11A,BCL2L11,CASP4,CCL2,CCND1,CD200,CD36,CD40,CD68,CDH2,CEBPB,CHEK1,CLU,COL1A1,CPT1B,CSF1R,CXCL8,CYP17A1,CYP19A1,DDIT3,ECH1,ECI2,EDN1,EGFR,EHHADH,FBP1,FBXO32,GADD45A,GAPDH,GBE1,GLCE,GLUL,GYG1,HDGFL3,HILPDA,HNF1B,HOXA7,HSPA5,ICAM1,ID2,IL4,IL6,IL6ST,IRF8,JAG2,JUN,KPNA1,MAN1A1,MEST,MGMT,MIR3189,MITF,MLYCD,MPO,MTTP,MYH7,NEAT1,NOS3,NR1H2,NR3C…	1864 (20)
thiostrepton		chemical - endogenous non-mammalian		1.325	4.17328	6.71e-05	ASPM,AURKB,CCND1,CDCA8,FOXM1,GADD45A,KIF2C,MCM10,NCAPG,TLR7,TLR8,TLR9	1398 (6)
IL36G	3.15	cytokine		1.321	5.22768	5.92e-06	CCL20,CD1A,CD200R1,CD83,CSF2,CSF3,CXCL10,CXCL2,CXCL8,IFNG,IL12A,IL12B,IL17A,IL23A,IL4,IL6,TNF,WNT5A	928 (14)
PDE5A	1.301	enzyme		1.32	2.90658	0.00124	CD247,FOXP3,IL1B,IL6,NOS1,PDE2A,PDE4A,PDE4B,S100A9,STAR	1349 (16)
E2F8	-1.582	transcription regulator		1.316	5.95861	1.1e-06	CCNA2,CCNB1,CCND1,CCNE2,CDCA2,CDK1,CHEK1,E2F1,ECT2,KIF23,MCM2,RACGAP1
FGF2	1.295	growth factor		1.315	17.6091	2.46e-18	ACE,ACER2,ACTA2,ADGRL2,ADM,AGAP3,AKR1B1,AKT1,ANG,ANGPT2,ANGPTL4,AQP3,AR,AXIN2,B2M,BAMBI,BBC3,BCL2,BCL2L1,BCL6,BDNF,BIRC5,BMP4,BNIP3,BRCA1,BRIX1,BTG2,CAV1,CBFB,CCL2,CCL20,CCNA2,CCND1,CCND2,CCNE1,CCNG2,CD274,CD34,CDK1,CDKN1A,CHEK1,CIDEC,COL1A1,CSF1,CSF3,CSPG4,CXCL12,CXCL2,CXCR4,DAD1,DDIT3,DLL4,EDNRB,EFNB2,EGFR,EGLN3,EGR1,ELK1,ENPP2,EOMES,EPCAM,EPHA4,EPOR,EREG,ERRFI1,ETS1,ETV4,ETV5,FGF2,FGF5,FGFR1,F…	2173 (20)
NR1I2	1.268	ligand-dependent nuclear receptor		1.312	2.09528	0.00803	ABCA1,ABCB1,ABCB10,ABCB9,ABCC3,AHCY,AHR,ANG,APOC2,CCL3L3,CCR2,CD36,CDKN1A,CEBPA,CES2,CES3,CPOX,CSF2,CTH,CXCL2,CXCL3,CYP1A1,CYP27A1,DHCR7,E2F1,EGR1,ELOVL6,FMO5,GLUL,GSTM1,GSTM3,HSD17B1,IFNG,IGF1,IL10,IL12B,IL1B,IL27,IL2RA,IL32,IL36A,IL6,INSIG1,INSIG2,JAZF1,JUN,MGST1,MTTP,MYB,OSM,PAPSS2,PDIA4,PGRMC2,PIPOX,PPARA,PPARG,SCD,SERPIND1,SOCS1,SPHK1,STAT3,TCN2,TGM2,TLR3,TNF,TNFRSF11B,TNFRSF14	2877 (18)
4-hydroxytamoxifen		chemical drug		1.311	10.1824	6.57e-11	ABCB1,AKAP1,AQP3,ATF3,BCL2,BCL2L1,BCL2L11,C3,CA2,CCL15,CCND1,CD55,CDCA7,CDKN1A,CEBPA,CEBPB,CEBPD,CHST2,CLU,CTSD,CYP19A1,CYP1A1,CYP1B1,DDIT3,DUSP1,DUSP5,EDN1,EDN2,EGFR,EGR1,EPOR,ERRFI1,FGFR1,FOS,FOSL2,FOXM1,FOXO1,GM2A,H2AZ1,HDGF,HEBP1,HSD17B7,IER2,IER3,IFNG,IGF1,IL10,IL4,IL6,IL7R,JUN,JUNB,KLK3,KLRC4-KLRK1/KLRK1,LORICRIN,MICOS10-NBL1/NBL1,mir-29,MKI67,MT1F,MT1X,MT2A,NCOA1,NEDD9,NFKBIA,NOTCH3,NRF1,O…	2362 (22)
2'3'-cyclic guanosine monophosphate-adenosine monophosphate		chemical - endogenous mammalian		1.31	8.35853	4.38e-09	AIM2,CASP1,CCL3L3,CCL4,CD86,CGAS,CIITA,CSF2,CXCL10,IFIT1,IFIT2,IFNG,IL10,IL13,IL18,IL1B,IL6,IRF7,ISG15,NLRP3,OAS2,RSAD2,SOCS1,SOCS3,TNF,WFDC21P	920 (16)
IGHE		other		1.308	1.96658	0.0108	CCL22,CCL3L3,CSF2,IL10,IL13,IL4,IL6,TNF,ZFP36
8-bromoguanosine 3',5'-cyclic monophosphate		chemical reagent		1.304	2.2161	0.00608	ACTA2,CAV1,CDK14,CDKN1A,CNN1,EDN1,FOS,FOXP3,ITGAM,JUNB,NOS3,PLAUR,S100A10,SNAI1,TAGLN2,TGFB3,VCAM1,VEGFA	1955 (15)
CpG ODN 2395		chemical reagent		1.303	4.69037	2.04e-05	BCL6,CCL3L3,CCL4,CD40,CD86,FCER2,FLI1,IL12B,IL1B,IL23A,IL4R,IL6,TNF,TNFRSF13B,TNFRSF13C	1419 (17)
SOX5	2.286	transcription regulator		1.302	2.82681	0.00149	BMP6,COL2A1,FGFR3,HAMP,HSPG2,IL10,LIPE,RUNX2,SPAG6	959 (7)
mitoxantrone		chemical drug		1.301	2.76195	0.00173	ABCG2,BBC3,BCL2L11,CDKN1A,COL1A1,CXCL10,CXCL8,IFI16,IFIT2,IL1B,IL6,IRF7,KLK3,MCL1,OAS2,PERP,RSAD2,TNF,TP63,VEGFA	1896 (18)
CXCL3	4.697	cytokine		1.3	3.4034	0.000395	CCL3L3,CCL4,CXCL10,CXCL3,GRK2,GRK5,ICAM1,IL1B,IL6,ITGA6,ITGB1,TNF	1342 (15)
Smad		complex		1.295	4.0655	8.6e-05	ANGPTL4,CDKN1A,CDKN2B,COL1A1,ID1,ID2,ID3,IFNG,INPP5D,MCL1,PTHLH,SERPINE1,SMAD7,TBX21,VEGFA,WNT5A	1724 (14)
oxazolone		chemical reagent		1.294	3.03058	0.000932	CCL20,CXCL10,CXCL3,ICAM1,IFNG,IL12B,IL13,IL17A,IL18,IL1B,IL4,IL6,SDC1,SDC4,TNF,VCAM1	842 (10)
NMDA Receptor		complex		1.294	1.56703	0.0271	ATF3,BDNF,DLG4,FOS,GRIN2A,HOMER1,NOS1,NTRK2,SYP
PLK2	5.028	kinase		1.291	3.14448	0.000717	CD40,CITED2,CXCL10,EDN1,FGL2,IFIT2,IL15,IL15RA,IL1B,IRF1,MERTK,PLAT,RBL1,RGCC,RGS1
4-methylnitrosoamino-1-(3-pyridinyl)-1-butanone		chemical toxicant		1.291	2.43063	0.00371	ALOX5,ANXA1,BCL2,BCL2L1,CDKN1A,DNMT1,EGFR,FOS,HOXA5,HTRA3,IKBKE,IL10RA,IL6,JUN,JUNB,LOX,PTGES,SOX9,TBXAS1,TP53I3,XPC	1869 (20)
ZBED6	1.339	transcription regulator		1.29	6.25493	5.56e-07	ANKRD50,ARL4C,BOP1,CRIM1,DLGAP5,FOSL2,GCK,KCTD1,LAMP3,MAP3K14,MB21D2,MYBL1,NASP,PMEPA1,PRPF19,ROCK2,SGK1,SPTBN1,TTK,TUBB3,UPP1,WWC1,WWTR1
dinoprost		chemical - endogenous mammalian		1.29	3.63078	0.000234	ADM,AKR1C1/AKR1C2,ANXA4,CCND1,CCND2,CD36,CYP19A1,EDN1,EGFR,FGF2,FOS,FOSL2,GSTM1,HSD11B2,ID1,ID2,ID3,IL1A,IL1B,IL2RA,IL6,JUN,LIPA,MGST1,PDIA4,PLA2G4A,PLCD1,PRLR,PTGS1,PTK2B,RUNX2,STAR,THBS1,VEGFA,YWHAZ	2228 (21)
GLI3	2.463	transcription regulator		1.289	8.6038	2.49e-09	ACTA2,AKT1,BCL2,BMP4,CCND1,CCND2,CD69,COL1A1,DLL3,DUSP1,DUSP2,DUSP5,EBF1,EGR1,ELK1,EMX1,ETV2,FGF17,FGF5,FGF8,FGFR3,FOXO1,GLI1,GNRH1,GREM1,GSX2,H2AX,HAND1,HES7,HMGB2,HOXA4,IRF1,JAG2,JUNB,KLF2,MAPKAPK2,NFKBID,NFKBIZ,PAX9,POU5F1,PTHLH,PVR,RUNX1,RUNX2,SFRP1,SMAD3,SOX9,STMN1,TBX6,TCF15,TERT,TNFAIP3,WNT2B,WNT5A	1130 (7)
CALCA	7.15	other		1.288	14.1096	7.77e-15	AHNAK,AKAP13,ANK3,CCL1,CCL2,CCL22,CCL4,CD44,CD83,CD86,CGNL1,CREM,CSF2RB,CXCL8,CXCR4,DISC1,EDN1,EGLN3,ESAM,ETS1,FA2H,FAR1,FGL2,FLT1,FOS,FOSL2,FOXP3,GADD45B,GNG12,GOLGB1,GPR65,HAVCR2,HILPDA,ICAM1,ICOS,ID2,IER3,IFNGR1,IGF1,IL13,IL17RB,IL2RA,IL2RB,IL4R,IL6,IL7R,IRF5,JAG1,JUNB,LILRB4,LMNA,LMO4,LRBA,MKI67,NFKBIA,NR3C1,P2RY1,PALM,PCSK1,PDCD1,PDLIM1,POMC,PPARG,PRDM1,PRL,PRXL2A,PSAT1,PTGER4,PXN,RAMP3,RAP1…	1917 (15)
PLAUR	2.433	transmembrane receptor		1.288	4.50446	3.13e-05	ACTA2,ANG,BCL2L1,C5AR1,CCL2,CCND1,CDH2,CTSB,CXCL3,E2F1,FOSL1,H2AX,ITGA6,ITGAM,ITGB1,JUN,JUNB,PLAU,PLAUR,PRKDC,SCN2A,SNAI1,SOCS1,TNF,VIM	1583 (17)
EGOT	-1.093	other		1.285	1.88273	0.0131	CXCL10,EGFR,GBP1,IL6,ISG15,ITPR1,MX1,OAS2,RSAD2,USP18
LTB4R	-1.421	G-protein coupled receptor		1.281	2.00043	0.00999	ALOX5,CCL3L3,CD36,CLEC7A,CXCL2,CXCL3,CXCL8,FLT1,HAMP,IL10,IL13,IL4,IRF5,TNF,VEGFA	1636 (17)
2-bromoethylamine		chemical reagent		1.28	4.19997	6.31e-05	A2M,ANXA1,ANXA2,C4A/C4B,CD44,CLU,EFEMP2,ELF3,FBLIM1,FCGR2A,GCGR,GPNMB,IER3,LAMC2,LGALS3,MCM3,PLA1A,RBM3,S100A10,S100A11,STING1,TIMP1,TMSB10/TMSB4X,TNFRSF12A,UPP1,VIM
FASN	1.094	enzyme		1.28	2.05601	0.00879	ABCG1,ACTA2,ALOX5,AMOTL2,CAV1,CD36,CDH2,CIDEC,CXCL8,DDIT3,EDNRB,ELOVL6,ERBB2,ETV4,FOXO1,GRK2,IL10,IL12B,IL1B,IL6,LRRK2,MLYCD,MRAS,PNPLA2,PRKAR2B,SCD,TNF,VIM	2287 (25)
Smad2/3/4		group		1.28	1.43533	0.0367	ACTA2,CDH2,CDKN2B,HMGA2,ID1,SERPINE1,SNAI1,TIMP1
NSUN6	-1.007	enzyme		1.279	4.16685	6.81e-05	AMOTL2,AXL,CDC20,CDKN2C,COL4A3,CRIM1,EMP2,ETV5,FGF2,FSCN1,GAS6,GLS,HMMR,MARCKS,SCHIP1,SERPINE1,SGK1,STMN1,TGM2,THBS1,TNS1,TOP2A
ETV4	-1.492	transcription regulator		1.272	2.98716	0.00103	ACTA2,ARID3B,B4GALT1,CAV1,CXCL8,CXCR4,ERBB2,ETV4,FN1,HPSE,JUP,KRT5,MMP25,MMP7,MUC4,MYB,PTK2,VIM,WWTR1	1517 (7)
GATA3	-2.439	transcription regulator		1.271	10.0334	9.26e-11	ADM,ANGPTL4,BCAS3,BCL11A,BCL11B,BCL2,BCL2L1,BHLHE41,BIK,BLVRB,BMF,CCL4,CCND1,CCR1,CCR2,CCR3,CCR5,CCR8,CD4,CDH2,CDKN1A,CDKN2C,CEBPA,CHST2,CNFN,CSF1R,CXCR4,CYP19A1,DTX1,EBF1,ELOVL6,EOMES,EPO,ETS1,FN1,FOS,FOXP3,FSCN1,GATA3,GLUL,GRHL3,HSD17B1,ICAM1,ICOS,IFNG,IL10,IL12RB2,IL13,IL17A,IL17RB,IL18RAP,IL24,IL2RA,IL2RB,IL4,IL6,IL7R,IL9R,IRF6,ITGAE,ITK,KLF4,KLRC1,LAIR1,LOC102724788/PRODH,LORICRIN,LOX,LTA,LT…	1817 (19)
streptozocin		chemical drug		1.271	3.77728	0.000167	ABCB1,ABCB11,ABCG2,ADORA2A,AKT1,ANGPT2,APLN,AQP9,AR,ARX,ATF3,ATF6,ATP1B1,ATP1B2,BBC3,BCL2,BCL2L1,CACNA1A,CACNA1B,CASR,CBS/LOC102724560,CCL3L3,CCNG1,CD68,CDKN1A,CEBPA,CETP,CIDEC,CLU,COL1A1,CPT1B,CREB1,CREM,CXCL12,CXCL2,DLL4,DNMT3A,DPP4,ELOVL6,FBP1,FBXO32,FFAR1,FGFR4,FN1,FOS,GABARAPL1,GATA4,GCK,GREM1,HSD11B2,HSPA5,HSPD1,HSPG2,ICAM1,IFNG,IGF1,IGFALS,IL10,IL1B,IL4,IL6,INSIG2,IRS1,JAG1,LGALS3,LMNB1,MI…	1891 (20)
ST8SIA1	-2.99	enzyme		1.271	2.56067	0.00275	C3,C4A/C4B,C5AR1,CCNE1,CDKN1A,EGFR,IL1A,IL1B,NES,POU5F1,SOX2,TNF	1971 (24)
amphetamine		chemical drug		1.27	3.5784	0.000264	ADORA2B,ATF3,BCL2,BCL2L1,BDNF,BMP4,CDH2,CREB1,CSF1R,DCC,EFNB2,EGR1,EZR,FGF8,FOS,FOSL1,FOSL2,GRM8,HSPA8,ICAM1,IL10,JPT1,JUN,JUNB,MYBL1,NOS1,PPP1R9B,PTPN21,RGS2,RGS3,RGS9,SELL,SGK1,STAT4,STIP1,SYP,TNFAIP3,UCHL1	1526 (20)
12(S)-hydroxyeicosatetraenoic acid		chemical - endogenous non-mammalian		1.27	1.46725	0.0341	FN1,IL6,PPARG,RB1,TNF
PEMT	-1.671	enzyme		1.269	4.16941	6.77e-05	CD68,COL1A1,DDIT3,DERL2,GCGR,GPT,HERPUD1,HSPA5,PEMT,TIMP1,TNF	1938 (17)
Usp17la (includes others)		peptidase		1.269	3.1891	0.000647	ABCG2,CCL20,CD44,CISH,CXCL8,IL1B,IL23A,IL6,KLF4,POU5F1,SNAI1,SOX2,TNF	1191 (18)
1-(2-hydroxy-5-methylphenyl)-3-phenyl-1,3-propanedione		chemical reagent		1.268	2.31605	0.00483	CEBPD,CREB1,DDIT3,PPARG	1445 (17)
TNFRSF1A	3.321	transmembrane receptor		1.267	9.8729	1.34e-10	ABCC3,ABCC5,ANGPT2,BCL2L1,BDNF,BIRC3,CCL19,CCL2,CCL20,CCL3L3,CCL4,CCNE2,CD36,CD38,CD44,CD68,CD83,CD86,CDH2,CDKN1A,CEBPB,CLMP,CSF2,CSF3,CXCL10,CXCL13,CXCL2,CXCL3,CXCL8,E2F1,E2F8,EFNA1,FLT1,GATA3,GCLM,GHR,GPT,ICAM1,IER3,IFNG,IGF1,IL10,IL12A,IL12B,IL15,IL17A,IL1A,IL1B,IL23A,IL24,IL4,IL6,ITGAM,ITGB5,JUN,KIF14,LATS2,LGALS9B,LMO2,MMP7,MPO,NHSL2,NQO1,P2RX7,PDGFA,PLAU,PPARD,SELL,SERPINE1,SOCS3,SQSTM1,SRC…	1474 (11)
WNT5A	-1.678	cytokine		1.266	8.73283	1.85e-09	ABCB1,AKR1C1/AKR1C2,ARHGDIB,AXIN2,BAIAP2L2,BCL2,BCL2L1,BIN1,BMP6,BTG2,CCL2,CCL3L3,CCND1,CD34,CD36,CD38,CD40,CD80,CDK6,COL1A1,COL2A1,CSF3,CXCL10,CXCL12,CXCL2,CXCL8,CXCR4,CYB5R2,CYP19A1,DLX1,DOK2,EGFR,ENPP2,ERBB2,EREG,ESR2,F2R,FAM234B,FLT1,FN1,GREM1,ID2,ID3,IL10,IL12B,IL15,IL1A,IL1B,IL6,IRF1,IRF8,ITGA4,ITGB3,ITGB7,LAG3,LAMA3,LAMB3,LAT,LONRF2,MMP7,NR5A1,NT5E,PDCD1,PECAM1,PGF,PIERCE2,PRKAR2A,PRKCI,PR…	1964 (17)
C3	2.016	peptidase		1.266	5.7986	1.59e-06	ACTA2,APOE,APP,BCL2A1,C3,C5AR1,CASP4,CCL2,CCL3L3,CCL4,CD55,CR2,CSF1,CSF3,CXCL10,CXCL2,CXCL3,CXCL8,FN1,GPT,GSTM3,IFNG,IL10,IL12B,IL13,IL17A,IL1A,IL1B,IL4,IL6,ITGAM,JUN,PTPRC,SELL,SMAD7,THBD,TIMP1,TNF,TNFRSF1A,UCP2,VCAM1,VEGFA,ZBP1	1179 (16)
myelin oligodendrocyte glycoprotein (35-55)		chemical reagent		1.265	2.90658	0.00124	IFNG,IL10,IL12A,IL12B,IL17A,IL23A,IL6,LAG3,NOTCH1,TNF	1199 (8)
ESRRB	2.271	transcription regulator		1.265	2.57187	0.00268	APLP1,BCL2,CCL20,CDKN1A,FBXO15,IL12B,IL17A,IL32,IL36G,IL7,MCL1,MEF2C,NFKBID,PCSK6,PDIA5,PFKFB2,POLE4,SLC13A5,SLC6A6,TNFSF14,XAF1
HNRNPK	-1.094	other		1.265	1.7122	0.0194	AR,ATF2,CDKN1A,FOXP3,ITGA6,KDM6B,LAPTM4A,LILRB4,LPP,NRXN2,PDLIM2,PPARG,RB1,SLC47A1,SOX2,SPN,TCN2,UCP2,VCAN,ZBTB20
RAG2	2.677	enzyme		1.264	3.85078	0.000141	ADAMTS17,CCDC152,CD4,COL6A2,CPA4,CSF2,CXCL10,EPHA4,FCGRT,GPR183,ID1,IFNG,IGLL1/IGLL5,IL1B,IL2RA,IL32,IL4R,IL6,IRF7,ISG15,LINC01814,LOC100240735,LRP4,MAL,MYO18B,NKD2,NT5E,PHETA2,RAP1GAP,RHOU,RPS4Y1,SMPD1,SMPD3,SNORD104,ST6GALNAC4,STAT1,TEAD1,TEDC1,TLR3,TNF,TNFRSF1B,TP53I11,ZNF300,ZNF385A,ZNF667,ZNF667-AS1	1784 (20)
MAPKAP1	1.205	other		1.264	1.96658	0.0108	CXCL10,CXCR4,FOXP3,IFI16,IFIT2,OAS2,PHF11,SLFN5,SNAI1
ATP-gamma-S		chemical reagent		1.262	8.96257	1.09e-09	BTG1,C3,CCL2,CCL22,CCL3,CCL4,CCR1,CCR5,CCR7,CD33,CD40,CD55,CD69,CD72,CD83,CD86,CREM,CSF1,CSF1R,CXCL2,CXCL8,CXCR4,EPOR,EREG,GAP43,IDO1,IL10,IL15,IL15RA,IL1A,IL1R2,IL2RA,IL6,IL7R,MMP19,MPEG1,PRDX2,SLC29A1,THBS1,TNF,WARS1	1625 (13)
mitomycin C		chemical drug		1.262	6.28567	5.18e-07	ALYREF,ATF3,ATF6,BCL2L1,BCL2L11,BIRC5,BRCA1,BTG2,CCNB2,CCND1,CD80,CDKN1A,CXCL8,DDIT3,DESI2,EGR1,GADD45A,HBEGF,HGF,HSPA5,IRF2BPL,ITPRIPL2,JUN,MCAM,MDM2,NQO1,PEG3,POU5F1,PRKCE,SESN2,SRSF7,TBC1D24,TP63,TYMP,VEGFA,WEE1,ZMAT3	2004 (22)
miR-186-5p (miRNAs w/seed AAAGAAU)		mature microRNA		1.262	1.88273	0.0131	AURKA,CTNND1,DDX43,FOXO1,HMGA2,NFAM1,PTPRG,TGFBR3,VIM,ZFHX4
CRP	-1.023	other		1.261	2.14935	0.00709	ACTA2,CCL2,CCL3L3,CD40,CXCL8,EGR1,F8,FCGR2B,FN1,IFNG,IL10,IL1B,IL1RN,IL6,IL6R,ITGAM,NOS3,PRKCA,PRKCB,SELL,SERPINE1,SMAD3,TNF,TNFSF10	1662 (18)
TBK1	1.003	kinase		1.258	7.95078	1.12e-08	ACTA2,BCL2L1,CCL3L3,CCL4,CD40,CD80,CD86,CDKN1A,CXCL10,CXCL2,CXCL3,CXCL8,EDN1,FGL2,HLA-E,ICAM1,IFI16,IFI44,IFIH1,IFIT1,IFIT2,IFIT3,IFNA2,IFNG,IL12A,IL12B,IL15,IL15RA,IL18,IL1A,IL1B,IL6,IRF7,ISG15,ISG20,NFKBIZ,NMI,OAS1,OAS2,OAS3,OASL,PLA1A,RBL1,RGCC,RILPL1,RSAD2,SH3BP5,SLCO3A1,SLFN13,SLFN5,TLR2,TLR3,TNF,USP18,VEGFA,WWTR1,ZC3H12A	1249 (17)
methylmercury		chemical toxicant		1.257	4.01818	9.59e-05	ACVR1C,ARHGAP18,ATF5,BCL2L1,BNIP3,CCNG1,CDK6,CITED2,COL1A1,CYP1A1,ECE1,EGR1,ID2,IL6,LTBR,MAPKAPK2,MDM2,MFGE8,NCKAP1,NOS1,NR2F6,PDCL3,PLD1,PLS3,PRLR,PTPRF,RHOB,SCGB3A1,SLC1A1,SLC9A3R1,STOM,TNFRSF1A	1622 (16)
IL12RB2	2.276	transmembrane receptor		1.256	3.79588	0.00016	CSF2,IFNG,IL17A,IL18,IL18R1,IL23A,TNF,VCAM1	1756 (18)
Vi capsular polysaccharide		chemical drug		1.256	2.31605	0.00483	CXCL8,IL12B,IL6,TNF	1544 (11)
BMP10	2.604	growth factor		1.255	5.20831	6.19e-06	A2M,AASS,ANGPTL4,APLN,BDH1,BMPR2,CCR1,CD274,CD55,CD83,COL1A1,CX3CR1,CXCL13,EGR2,ENG,FCGR2A,FGF2,FGL2,FN1,FOS,GLI1,GPR65,HEY1,HLA-A,HTR2B,ICAM1,ID1,ID2,ID3,IGFBP7,IL1B,LTBP2,MEF2C,NFKBIA,NKX2-5,RSAD2,SERPINE2,SHMT1,SMAD7,SOX9,THBS1,TIMP1,VCAM1,VCAN,WT1	1576 (11)
AIP	-1.332	transcription regulator		1.255	3.01457	0.000967	ACKR3,ADRA1D,AHR,BIRC5,CMKLR1,CX3CR1,CYP1A1,CYP1B1,CYSLTR1,DUSP1,GDNF,GPRC5A,GRM3,NPR3,P2RY14,PDE1B,PDE4B,PDE8A,PDE8B,PDE9A,PPARA,RASGRP1,RET,RGS16,RGS2,S1PR1	1405 (7)
MED14	1.149	transcription regulator		1.254	2.39903	0.00399	CD36,CIDEC,DUSP1,FOXP3,IRF8,ISG15,LAD1,NR3C1	1398 (7)
Stat1-Stat2		complex		1.254	2.31426	0.00485	EIF2AK2,IFNG,IL12B,IRF1,IRF7,OAS1,TLR3
6F apoA-I mimetic peptide		chemical reagent		1.254	1.7167	0.0192	ALPP,GFI1,IL23A,IL36G,NOTCH1,NOTCH2,SFTPA1
lomustine		chemical drug		1.253	4.64016	2.29e-05	A2M,ANXA1,ANXA2,BIRC3,C4A/C4B,CD44,CDCP1,CLU,ELF3,FBLIM1,FCGR2A,GCGR,GPNMB,GSTM3,ID1,IER3,LAMC2,LGALS3,MCM3,PLA1A,POLH,RBM3,RCN1,S100A10,S100A11,STING1,TIMP1,TMSB10/TMSB4X,TNFRSF10B,TNFRSF10D,TNFRSF12A,UPP1,VIM
USF1	1.186	transcription regulator		1.251	3.70553	0.000197	ABCA1,ACP5,AGTRAP,AKAP12,APLN,B2M,CBS/LOC102724560,CCL3L3,CCNG2,CEACAM1,CEBPA,CHI3L1,CIITA,CPT1B,CR2,CTSS,CYP19A1,DUSP1,FBXO32,FMR1,GATA3,HAMP,HGF,HOXB4,IGF2R,MC1R,NR5A1,P4HA1,PIGR,POMC,PTK2,SERPINE1,SLC19A1,SYNPO,TERT,TNFAIP3,UCP2,XCL1	661 (7)
mevalonic acid		chemical - endogenous mammalian		1.251	1.82974	0.0148	ABCA1,CCL2,CD40,CD55,GNAI1,ICAM1,IL1B,KLF2,PLAT,PPARA,RARRES2,SERPINE1,SMAD3,TNF,TNFSF4,VCAM1,VEGFA
TNFAIP6	1.763	other		1.25	3.67366	0.000212	ACTA2,CDH2,CXCL12,CXCL2,HAMP,IL10,IL1B,IL4,IL6,ITIH1,SNAI1,SPINT2,TNF,TNFAIP6,VIM	1253 (16)
PRKACA	1.006	kinase		1.25	2.05257	0.00886	ANTXR2,BCL2L11,BDNF,CCND1,CCND2,CEBPB,CREM,CYP17A1,CYP19A1,ID2,IGF1,IL4,LORICRIN,MYH10,OXTR,PRKACB,PRL,SDC1,SOCS3,VCAM1	2172 (22)
PTC-209		chemical reagent		1.25	1.70997	0.0195	CCDC80,CDKN1A,CGNL1,COL1A1,FHOD3,IGFBP5,IL6,LOXL2,LOXL3,MYH6,MYH7,PDGFRA,PKP2,PLOD2,RND1,SORT1,SULF1,TNFRSF11B,TNNC1
MAP3K8	1.145	kinase		1.249	10.684	2.07e-11	ACP3,APOE,ARHGAP22,ARRDC3,BIRC3,BMP1,BNIP5,CBFB,CCL20,CCL4,CCR1,CCR2,CCR5,CDK5R1,CEBPD,CIITA,CLIC5,COBLL1,COLEC12,CREBL2,CSF2,CSF3,CXCL2,CXCL3,CXCL8,DOK2,ECI2,EGR1,ETV4,FAAP24,FAM107B,FOS,FSCN1,GAB1,GFI1,GPR146,GPR171,HIP1,HTRA4,IER3,IER5,IFNG,IFNGR1,IL10,IL12A,IL12B,IL18,IL1A,IL1B,IL23A,IL4,IL6,IRF2BPL,JUN,JUNB,LAD1,MAD2L1,NFAM1,P2RY1,PLAT,PTGER2,PTGER4,RCSD1,RGS3,RHOF,SESN1,SH3D21,SLCO4A1,SLFN1…	1200 (14)
RPS6KA4	1.1	kinase		1.247	3.69037	0.000204	DUSP1,FOS,IL10,IL12A,IL12B,IL2RA,IL6,JUN,JUNB,TNF	1455 (13)
CHEK2	-1.638	kinase		1.247	2.09098	0.00811	BCL2L1,BIRC5,CCNG1,CDKN1A,E2F1,H2AX,MDM2,TJP1,TP53BP2,TP73	2164 (20)
Collagen(s)		complex		1.246	3.00174	0.000996	BCL3,C3,C4A/C4B,C5AR1,CD55,CD68,CR1L,CR2,CREB3L1,DDIT3,EDEM1,FN1,HERPUD1,ITGAM,LAMP2,PLA2G6,PLCB3,PSAT1,PXN,SERPINH1,SNAI1,THBS1	1729 (13)
CIRBP	-1.009	translation regulator		1.244	3.50446	0.000313	AXIN2,CCND1,CCNE1,CD44,CXCL2,CXCL3,HHEX,IL6,LRP4,MMP7,NKD1,PTK7,RNF43,SLC9A3R1,VEGFA,VRK1	1359 (14)
Hbb-b2		other		1.243	3.77211	0.000169	BCL2L11,CCR2,CCR5,CD44,CEBPA,CIITA,CLEC7A,CMTM3,CXCL10,CXCR2,CXCR3,CXCR5,FN1,HFE,IL10RA,IL1B,IL2RB,ITGAM,LTB,LY86,PRLR,SPI1,TFRC,TLR2	1289 (11)
brefeldin A		chemical - endogenous non-mammalian		1.242	5.51004	3.09e-06	ABCA12,ADRA1B,APP,BBC3,BCL2,CD44,CEBPB,CXCL3,DDIT3,ERLEC1,GADD45B,HLA-A,HLA-C,HSPA5,IFNG,KCND2,KLF4,LAMP3,OPRK1,OXTR,PRNP,SESN2,SLC34A1,STARD5,SYVN1,TFDP1,THBS1,TIMP1,TNF,UBA5,UFM1,WNT16	1331 (17)
5-hydroxytryptamine		chemical - endogenous mammalian		1.238	3.93554	0.000116	APBB1IP,ASIC3,BDNF,BIN1,CCL2,CFL1,CXCL8,CYP19A1,CYP1A1,CYP1B1,EGR1,EIF4EBP1,F2R,FGF2,FOS,GAD1,GDNF,GPR183,GTF3A,HBEGF,HTR2B,ICAM1,IFNG,IGF1,IL10,IL17A,IL1A,IL1B,IL6,MAPK13,NOS3,NR3C1,POMC,PRL,RAB8A,RABAC1,RPS6KA1,RUNX2,SEMA6B,SERPINB2,SERPINE1,SLC6A4,STX4,STX5,THBS1,TNF,TNFRSF1A,TRPV1,TUBA8,UCP2,VCAM1	1591 (20)
IQGAP2	1.093	other		1.238	1.84164	0.0144	CCND1,CTNNBIP1,FOSL1,LEF1,NKD1,SFRP1,WNT4,WNT5A
rifampin		chemical drug		1.236	3.9393	0.000115	ABCB1,ABCB10,ABCB11,ABCB4,ABCC3,ABCG1,ABHD2,AKR1C1/AKR1C2,ARHGEF19,AXIN2,BMP1,C12orf42,CCNJ,CD24,CD36,CEP70,CES2,CFL1,COL6A1,CSF1,CTNNAL1,CXCL10,CYP1A1,CYP4B1,DSE,ECT2,ELK1,ELOVL6,ENPP2,FGGY,FMO5,GBP2,HMGB3,HMGN2,HMMR,IL1B,ITGAM,KIF14,LAMA3,MATN2,ME1,MYB,NAGK,NCAPH,NEIL3,NUF2,OSBP2,PADI2,PFAS,RACGAP1,RGS10,SCD,SKA3,STYX,TBC1D9,TESMIN,TLR2,TNFRSF11B,TSKU,USP13,USP18,WT1	1771 (18)
FSTL1	-1.459	other		1.236	1.95078	0.0112	ACTA2,CASP1,COL1A1,EIF4EBP1,FN1,GDF15,IL1B,IL6,LRP6,NLRP3,OSM,TNF
OSU-2S		chemical reagent		1.236	1.34486	0.0452	CCNE1,CDKN1A,CEBPA,CEBPB
Ikb		group		1.232	3.67366	0.000212	BCL2,BCL2L1,BLVRA,CCL2,CCNB1,CCND1,CXCL3,HHEX,HSPA5,ICAM1,IL6,TNF,TNFAIP3,TP73,UACA	894 (11)
TANK	1.058	other		1.232	2.09637	0.00801	CXCL2,CXCL3,CXCL8,DNMT3A,IFIT1,IL12B,IL1A,IL23A,IL6,LTA,NFKBIZ,PLA1A,PLAAT4,RGCC,TIMELESS,TNF,ZC3H12A	916 (15)
BCL2A1	1.302	other		1.231	2.22475	0.00596	BCL2,BCL2A1,BCL2L1,CD69,CXCL8	2075 (22)
RHOA	-1.043	enzyme		1.23	6.28233	5.22e-07	ACTA2,ANLN,BCL2,BCL2L1,CCNB1,CCND1,CCNE1,CDKN1A,CDKN2B,CEBPB,COL1A1,CTSD,CXCL10,CXCL8,DIAPH1,ECT2,ERBB2,FN1,FOS,FOXP3,GATA3,GDF15,HSPD1,ICAM1,IFNG,IL17A,IL1B,IL4,IL6,IRF1,ITGB1,ITGB5,JUN,MYLPF,NOS3,PAK1,PDCD1,PIK3CG,PLAU,PPARA,PRLR,RHOB,RHOC,RND3,ROCK2,RUNX2,SOX9,STAR,STAT3,TBX21,TG,TNFRSF18,VCAM1	2139 (22)
RFC4	-1.173	enzyme		1.23	1.98716	0.0103	BCL2,CCND1,CDH2,NOTCH1,NRARP,POU5F1,SOX2
PDGF (family)		group		1.23	1.43533	0.0367	CALR,FN1,HSPD1,JUN,P4HB,PDGFRB,PDIA3,VIM
acetaldehyde		chemical - endogenous mammalian		1.229	3.1891	0.000647	CEBPB,CNR1,COL1A1,DDR2,FOS,IL6,JUN,KLF9,PPARA,PPARG,SMOX,TIMP1,TNF	2154 (20)
IGF2BP1	1.486	translation regulator		1.227	1.59688	0.0253	AXIN2,BCL11A,BIRC2,CD44,CDC34,CDKN1A,COL1A1,COL6A2,DDIT3,GADD45A,GLI1,HBD,SERPINH1,SOX9,WNT3
methylprednisolone		chemical drug		1.223	12.0004	9.99e-13	A2M,ABAT,ABCB4,ABCC9,ACSL1,ADCY6,ADGRL2,ADRA1B,AHCY,AK4,ANXA1,ANXA2,ARL4A,ARSB,ASAH1,ASPA,ASS1,ATP1B1,AZIN1,B2M,B4GALNT1,BBC3,BDH1,BDNF,BLNK,BTG1,C1QBP,CACNA1D,CAMK1,CAMK1D,CBLB,CCL3,CCL4,CCND1,CCNG1,CCT6A,CD180,CD22,CD36,CD38,CD44,CD72,CD9,CDH2,CDKN1A,CITED2,CNN3,CR2,CREG1,CREM,CROT,CTNNA2,CTSS,CXCL3,DHRS9,DMD,DPYS,DSC2,DUSP1,DUSP2,ECE1,EDNRB,EFNA1,ELOVL5,ENPP2,EPO,FBLN5,FBXO32,FCGR2A,FCGR2B,FGL…	2169 (18)
IGFBP2	5.717	other		1.223	3.87943	0.000132	AKT1,ARRB2,BCL2L1,CADM1,CCL2,CCND1,CD24,COL21A1,EGFR,ELOVL6,EMP2,ENPP5,EPHA4,ESCO2,FN1,GDF15,GHR,HHLA2,IGFBP2,IGFBP4,ITGA5,ITGA6,NEDD9,NUP210,RBMS3,STAT3,TGFB3,THBS2	2212 (22)
SRF	1.034	transcription regulator		1.222	5.82974	1.48e-06	A2M,ABCA4,ACTA2,ACTG1,ACTG2,AKAP12,ANKRD6,APOLD1,ARHGAP20,ATF3,BCL2,BCL2L1,BCL2L11,BPGM,BRD3,CDKN1A,CDKN2B,CEBPD,CENPB,CLDN12,CMA1,CNN1,CORIN,CTNNBL1,CXCR4,DMD,DMKN,DUSP5,EGR1,EGR2,EGR3,ELK1,EPG5,ETS1,EXTL2,EYA2,EZR,FERMT2,FHL2,FILIP1L,FLT1,FOS,FOSL1,FOXP3,G0S2,GADD45A,GATA4,GCH1,GDA,GFI1,GPATCH4,HAMP,HES6,HIPK1,HSPG2,IER2,IGF1,IL15,IL4,ITGA1,ITGA6,ITGAM,ITGB1,JUN,JUNB,KDSR,LAMA3,LBH,LDB3,LMCD1,L…	1646 (20)
Z-LLL-CHO		chemical - protease inhibitor		1.221	13.209	6.18e-14	ABCB1,ABCG2,AGO2,AHR,AICDA,AKR1B1,AKR1C1/AKR1C2,AKT1,APP,AR,ARHGDIB,ARNT,ATF3,AURKA,BBC3,BCL2,BCL2A1,BCL2L1,BCL2L11,BIRC3,BIRC5,BST2,BUB1B,CACNA1A,CASR,CBS/LOC102724560,CCL2,CCND1,CCND2,CCNG1,CCT2,CDKN1A,CDKN1C,CDT1,CEBPA,CEBPB,CFL1,CHD1,CISH,CLU,CTCF,CTSB,CXCL10,CXCL2,CXCL8,CYP1A1,CYP27B1,DAG1,DCC,DDB2,DDIT3,DDR2,DEFB4A/DEFB4B,DHFR,DLG4,DMD,DOK1,DUSP1,DUSP8,EIF4E,EIF4EBP1,ETS1,ETV5,FGF2,FMR1,FOS…	2172 (17)
DAPK1	1.129	kinase		1.221	1.71897	0.0191	CCR7,CXCL8,IL1B,SELL
PPP1R13B	-1.047	phosphatase		1.22	1.71897	0.0191	BBC3,CDKN1A,LATS2,TP53I3
MERTK	1.797	kinase		1.218	1.59517	0.0254	CD274,EPOR,FGL2,HGF,IFNG,IL10,IL12A,IL17A,IL18,IL1B,IL23A,IL6,RGCC,RILPL1,TNF,ZC3H12C
CYP1B1	11.358	enzyme		1.218	1.32239	0.0476	ACSF2,ADARB2,APLP1,CACNA1D,CBR3,CBX3,CCND1,CCNE1,CD80,CYP17A1,CYP1B1,CYSLTR1,ECI2,ETHE1,FLRT3,GPRC5A,GSTM2,GSTM3,IFNLR1,IGFBP2,KDM5D,LMO1,MAPK13,MCAM,MICAL1,NQO1,PPIC,PTGS1,PTPRF,RGS16,SLC46A3,SLFN13,SOCS2,ST3GAL4,STARD9,TGFB3,THBS2,TNFSF10,VLDLR,WEE1
PROCR	3.424	other		1.217	4.15677	6.97e-05	ANGPT2,CCL22,CCND1,GBP2,GBP4,GBP6,ICAM1,IL1B,IL1R1,IL23R,IL6,IRF8,LIF,ROCK2,TJP1,TNF,VCAM1	1171 (19)
buthionine sulfoximine		chemical drug		1.217	3.61261	0.000244	ABCB1,BCL2,BCL2L1,CCR2,CCR5,CD274,CD36,CXCR4,FOS,HBEGF,HSD11B2,IL2RA,NFKBIA,NQO1,SERPINE1,TNFAIP3,TNFRSF10B	1573 (12)
Fendrr		other		1.214	1.34486	0.0452	CASP1,IL18,IL1B,NLRC4
EFNA3	1.498	kinase		1.213	1.39041	0.0407	ABCA12,APOBEC3G,DCBLD2,EFNA3,ETV5,FOSL1,IRF1,IRF7,KRT18,NT5E,PKP1,PLAT,PTHLH,SLC20A1,SOX9,TRIM2,UBE2C
FYB1	1.284	other		1.211	4.20971	6.17e-05	BCL2L1,CD69,IFNG,IL10,IL12B,IL2RA,IL6,ITGAM,SKAP1,TNF	1753 (15)
MYOCD	1.002	transcription regulator		1.209	2.21467	0.0061	ACTA2,BCL2L1,CACNA1D,CCL1,CDKN1A,CNN1,COL1A1,COL2A1,DDIT3,FBXO32,FN1,FOS,GATA4,GJC1,HAND1,KCNMB1,LOC102724428/SIK1,LPP,MEF2C,MYH11,MYH6,MYH7,MYL4,MYLK,MYLPF,PDLIM3,PHKA1,S100A4,SCN9A,SNAI1,TNNC1,TNNI1,TTN,VCAN,VEGFA,XBP1	797 (12)
OSMR	-6.682	transmembrane receptor		1.206	6.06399	8.63e-07	ARTN,BCL2,BCL3,BIRC3,BIRC5,C15orf48,CASP4,CD4,CISH,CXCL10,CXCL2,FOS,GAP43,GBP2,GBP4,GBP5,IL6,IL6R,IL6ST,ITGAX,JAK2,JUNB,LRG1,OAS1,OSM,PHF11,SBNO2,SCD,SOCS1,SOCS3,STAT3,TIMP1,TNFSF11,TRIM35,ZFP36	1426 (16)
tipifarnib		chemical drug		1.206	2.31605	0.00483	CDKN1A,IFNG,SQSTM1,TNFRSF10B	1915 (16)
RAD51AP1	-1.134	other		1.206	1.78781	0.0163	CD44,ITGA6,KLF4,POU5F1,SOX2
GW3965		chemical reagent		1.205	8.38616	4.11e-09	ABCA1,ABCG1,APOD,APOE,APP,CAV1,CCL4,CCNA2,CCNB1,CD38,CD80,CD86,CENPF,CH25H,CHEK2,CIDEC,CSF3,CX3CR1,CXCL10,CXCL8,CYTH1,CYTIP,DHRS9,DUSP1,EDNRA,FAM3C,FOXM1,GCK,GNAI1,GRAP2,HCAR2,HCAR3,IER3,IL12B,IL1B,IL1RN,IL6,IRF8,KIF23,LIPE,MERTK,MID1IP1,MVD,MYLIP,NFKBIA,PCYT2,PKIB,PLTP,PRKAR2B,PRKG2,RGS1,SCD,SOCS3,STAR,SYN1,TNF,TNFSF14,TOP2A,TRIB1,UHRF1,VEGFA,VIPR1,VLDLR,WFIKKN1	1800 (21)
TRPV4	1.224	ion channel		1.204	2.62709	0.00236	CCL3L3,COL2A1,CXCL10,CXCL2,CXCL3,DUSP1,FOS,IL1B,IL6,SLC25A5,SOCS3,THBS1,TIMP1,TLR2,TNF,VCAM1	1220 (15)
3M-002		chemical reagent		1.204	1.80967	0.0155	ARRDC4,BANK1,BCL2A1,BFSP2,CCL20,CCL3L3,CCL4,CCND1,CD40,CD69,CD83,CD86,CXCL10,CXCL3,ETV4,ETV5,FCMR,FOSL1,GCGR,GPNMB,IFI44,IFNG,IL12B,IL18BP,IL1B,IL6,IRF7,ITGAX,LHFPL1,LRRC34,LTA,MOG,NCF4,PHF11,SLFN12L,SPRED3,SPRY4,SYCP3,TLR8,TMEM150B,TMEM204,TNF,TNFSF10,TNFSF15
hydrochloric acid		chemical - endogenous mammalian		1.203	3.25806	0.000552	CCL2,CCL3L3,CCL4,CXCL2,CXCL3,CXCL8,FOS,GLS2,HSH2D,ICAM1,IL10,IL1B,IL6,JUN,TNF,VCAM1	1947 (14)
hemoglobin		complex		1.202	3.4034	0.000395	ADM,CDKN1A,CXCL8,EDN1,GCLM,IL6,ME1,MGST1,NOS3,NQO1,PIR,TFRC	1454 (19)
GMFG	-1.464	growth factor		1.199	1.34486	0.0452	IL6,ITGA5,ITGB1,TNF
HNRNPA2B1	-1.432	other		1.195	11.0942	8.05e-12	ABCB1,ADGRG2,ADORA2B,AKT3,ARSJ,BCL2L1,CACNB2,CADM1,CD24,CIDEC,CRIP1,DDR1,DSE,ELOVL7,ERBB3,EYA4,FN1,FSCN1,GABRA5,GABRB2,GDF15,GJC1,HIPK2,HMGB3,HNRNPA2B1,IDS,IFNG,IGFBP2,IL6,JUP,KCTD12,LETM2,LPAR1,MEIS2,MEST,MFHAS1,MMD,MOCOS,MSRB3,MUC13,MYO1A,NOVA1,NPR3,NRCAM,OAS1,P4HA1,PDGFC,PEG10,PGM2L1,PHACTR2,PITPNC1,PKIB,PLCB4,PLOD2,RYR1,SCN9A,SEMA3B,SFI1,SLC1A1,SNAI1,SPAG4,SRI,SRPX,SRSF1,ST8SIA4,STK32B,STOM,S…	1000 (7)
gentamicin		chemical drug		1.193	8.28988	5.13e-09	ABAT,ABCC3,ACP2,ACSM3,ADRB1,ALCAM,APOD,ARHGAP5,ATF3,AZIN1,BLNK,BMP1,BMP4,BMP6,BTG2,BTG3,C4A/C4B,CA4,CALR,CBS/LOC102724560,CCL2,CCND1,CCNG1,CD69,CD9,CDC34,CEBPB,CFP,CHORDC1,CITED2,CLU,CNKSR3,CPEB1,CRYL1,CSF1,CTSB,CTSD,CXCL10,CYP1A1,DAGLA,DDIT3,DDX39A,DECR2,DMD,DNAJB4,DPEP1,DPP4,EGR1,ENPP2,EPB41L2,FOS,GADD45A,GARNL3,GAS6,GDF15,GHR,GJB2,GOLGA3,GTF2H2,H2AX,H3-3A/H3-3B,HAVCR2,HIVEP2,HSD11B2,HSP90AA1,H…	2019 (19)
NME3	-1.108	kinase		1.192	1.71897	0.0191	ITGA1,ITGA2,ITGB1,VIM
TOX	-2.351	transcription regulator		1.191	6.04528	9.01e-07	AHR,CCR7,CD27,CDKN1C,CXCR3,EGR3,EOMES,FOXO1,HAVCR2,ID2,ID3,IL10,LEF1,PDCD1,PRDM1,TNFRSF8,TNFRSF9,ZBTB7B
Raf		group		1.186	4.41341	3.86e-05	BCL2L11,CCND1,CDKN1A,E2F1,EDN1,EGR1,ETV5,FOS,FOSL1,GDF15,GRIN1,HAMP,HMGA2,ID2,IER2,IER3,IFI16,JUN,KRT18,MANSC1,MCL1,MYH11,PHLDA2,PRL,RET,RND3,SEMA6A,SLC20A1,SPRED2,SPRY1,SPRY2,SPRY4,TNFAIP3,TOP2A	2179 (21)
Stat1 dimer		complex		1.185	3.03198	0.000929	CD36,CIITA,CXCL10,CXCL9,DUSP1,EIF2AK2,IFNG,IL23A,IL6,IRF1,IRF8,SOCS3,TBX21,TNF	1722 (15)
ZMIZ1	-2.331	transcription regulator		1.183	2.22475	0.00596	DTX1,HES1,IL2RA,NOTCH1,SERPINE1	892 (7)
RAC1	-1.086	enzyme		1.181	3.92812	0.000118	ABCB1,ACP5,ACTA2,AKT1,APBB1,ATF3,BCL2L1,BCL6,CCND1,CD86,CDH2,CIITA,COL2A1,CXCL8,DLL4,DPYSL2,DUSP1,EPCAM,FGF2,FN1,FOS,FOSL1,FOXO1,HOXA1,HSD11B2,ICAM1,IFNG,IL10,IL13,IL1B,IL23A,IL4,IL6,IL6R,ITGA6,ITGB1,JUN,MCL1,MYH7,NEUROG3,PAK1,PLAUR,PRL,RAC3,SLC5A5,SOX2,SOX5,SOX9,STAT1,STAT3,VCAM1,VEGFA,WNT5A	1429 (14)
SLC7A5	-1.056	transporter		1.181	1.35754	0.0439	CHAC1,DDIT3,IFNG,IL17A,IL4,SLC3A2
acetyl-L-carnitine		chemical - endogenous mammalian		1.18	1.40121	0.0397	BBC3,CDKN1A,COX4I2,GABPB1,GADD45A,NRF1,PPARA,PPARG,RRM2B
WNT5B	1.157	other		1.177	1.35754	0.0439	ACTA2,CCND1,COL1A1,COL2A1,FN1,VCAN
curdlan		chemical - endogenous non-mammalian		1.174	3.61261	0.000244	CD69,CSF2,CXCL2,CXCL8,FOS,FOXP3,IL10,IL17A,IL1B,IL23A,IL2RB,IL4,IL6,JAG1,NFATC1,OCSTAMP,TNF	1039 (15)
MCL1	1.591	transporter		1.174	1.46725	0.0341	CCND1,MCL1,NQO1,TPT1,UAP1L1
Il12 receptor		complex		1.172	2.31605	0.00483	IFNG,IL4,TBX21,TNF	1261 (16)
CREB3	1.808	transcription regulator		1.171	2.70115	0.00199	ANXA1,ARF4,COPB1,DDIT3,HSPA5,INSIG1,INSIG2,KLK3,TMPRSS2,UBXN4,XBP1	1660 (7)
S-nitroso-N-acetyl-DL-penicillamine		chemical reagent		1.17	4.59007	2.57e-05	ADM,BCL2,BIRC5,BNIP3,BRCA1,CCL2,CCNB1,CCNE1,CDKN1A,CXCL12,CXCL8,DDIT3,ETV4,IFNG,IL12B,IL13,IL18,MARCKSL1,MB,MSH6,MST1R,NOS3,NSF,PPARD,PRDM1,S100A10,TGFB3,TIMP1,TNF,TP73,VEGFA	1713 (16)
CTSB	2.21	peptidase		1.17	3.14813	0.000711	ACTA2,APP,CCND1,COL1A1,CTSB,CXCL2,CXCL3,E2F1,H2AX,IL10,IL1B,IL4,PLAUR,PRKDC,SPHK1,TNF,VEGFA	1935 (22)
EIF2AK4	1.027	kinase		1.17	1.95861	0.011	ATF3,ATF5,BCL2,CD247,CHAC1,CYP2C18,DDIT3,EGR1,IL10,IL12B,IL1B,IL6,MOG,PPARG,PRDM1,PSAT1,TNF
ammonium chloride		chemical drug		1.169	1.63078	0.0234	APP,CD9,CTSB,EDN1,FOXO1,GRN,IL1B,IL6,RCAN1,SQSTM1,TFRC,WWP2
anandamide		chemical - endogenous mammalian		1.166	4.51145	3.08e-05	ACTR5,ANGPTL4,BBC3,FGF2,FKBP1A,FOS,GNRH2,HSPA5,IFNG,IL10,IL12B,IL1B,IL23A,IL4,IL6,NCSTN,NOS1,PPARD,PPARG,PPIL3,PRLR,STIP1,TNF	1781 (19)
IL4R	1.303	transmembrane receptor		1.165	3.88273	0.000131	ACSL1,ADGRL2,AGRN,AICDA,CACNB2,CCL22,CD69,CD86,CEBPB,CX3CR1,DISC1,EGR2,ETV5,FCER2,GATA3,GRIN2A,HOMER1,IFNG,IL10,IL12A,IL12RB2,IL13,IL17A,IL1B,IL2RA,IL4,IL6,ITGAX,JCHAIN,LZTS3,MYO6,NRXN2,PPARG,RUNX2,SEZ6,SLC8A2,SLC8A3,SOCS3,SOX2,TBX21,UNC13B,ZDHHC2,ZNF804A	1396 (17)
lactosylceramide		chemical - endogenous mammalian		1.165	2.3363	0.00461	CD40,CIITA,CSF2,CXCL10,HLA-DQA1,ICAM1,IL12B,IL6,PECAM1,TLR2,TNF,VCAM1	1039 (13)
BMP4	-16.023	growth factor		1.164	4.09963	7.95e-05	ABCG2,ACTA2,ACVR2B,ADGRG1,ARX,BCL2,BMP4,CCL19,CCND1,CCNG1,CCR7,CDKN1A,CEBPA,CEBPB,CNN1,COBLL1,COCH,COL2A1,CSF3,CYP17A1,CYP19A1,DEPP1,EFNA1,EGFR,ELF3,EPCAM,ERVFRD-1,FGF8,FOXP3,GATA3,GREM1,HAMP,HES1,HEY1,HMGA2,ID1,ID2,ID3,IFNG,IL6,ITGA4,JUN,JUNB,KLF10,KLF4,L1CAM,LAMA1,LEF1,MC1R,MITF,MIXL1,MSX1,MXD1,MYH7,NES,NKX2-5,NUPR1,PGF,PITX2,POMC,POU5F1,PPARD,PPARG,PRKCB,PRKCH,PRR5,RET,RUNX2,SALL3,SERPINE1,SMA…	2494 (20)
SPRY4-IT1	-7.055	other		1.158	1.59176	0.0256	CDH2,ESRRA,F11R,SNAI1,VIM,ZNF703
FHL2	9.259	transcription regulator		1.157	2.64207	0.00228	ACTA2,BCL2L11,CCND1,CNN1,CTSD,CXCL10,CXCL12,CXCL8,FHL2,IFNG,IL10,IL12B,IL13,IL17A,IL23A,IL4,MITF,MPO,MRC2,PDGFRB,S1PR1,TJP1,TNF,WNT5A	1858 (20)
11,12-epoxyeicosatrienoic acid		chemical - endogenous mammalian		1.157	2.56067	0.00275	CD44,CD82,DUSP1,EGFR,ICAM1,NFKBIA,NME1,PIK3CG,PLAT,PPARG,SLC5A2,VCAM1	2159 (23)
ponesimod		chemical drug		1.155	3.08938	0.000814	CCL2,IL10,IL4,IL6,MT1E,MT1F,MT1X,MT2A,S1PR1,S1PR2,SERPINE1,THBS1
VTN	-2.024	other		1.153	5.77211	1.69e-06	BCL2,BCL2L1,CDKN1A,COL1A1,CXCL3,EFNB2,IL1B,IRF8,IRF9,IRS1,ITGA4,ITGA5,ITGAM,ITGB1,PLAU,PLAUR,PXN,RUNX2,S100A10,SERPINE1,TNF	1843 (20)
MET	-2.379	kinase		1.147	10.644	2.27e-11	AKT1,AQP3,ARID5A,AURKA,AURKB,BCL2,BMF,BMP1,CCL3L3,CCND1,CCND2,CD274,CD44,CDH2,CDK1,CDKN1A,CITED2,CLDN23,CXCL8,EDN1,FBXO32,FGL2,FN1,FOS,GATA3,GCLC,HBEGF,HGF,HIP1,IGF1,IL15,IL15RA,IL18,IL1B,IL6,ITGA3,ITGB1,JAG2,JUN,KLF4,LAMA3,LEF1,LTA,MAD2L1,MAL,MDM2,MERTK,mir-103,mir-221,mir-24,mir-27,MUC1,NFKBIZ,NOTCH4,PERP,PLK1,PLK2,POU5F1,RILPL1,RRM2,RUNX1,SH3BP5,SLCO3A1,SNAI1,SOCS3,SOD1,SOX2,SP6,TCHP,TLR3,TNFS…	1469 (15)
PTPRJ	-1.593	phosphatase		1.147	7.284	5.2e-08	ACP3,ACTA2,ARID5A,BBX,CCL3L3,CCL4,CCNA2,CD69,CEBPD,CITED2,CXCL2,CXCL3,EDN1,FGL2,FOS,HBEGF,IL12A,IL18,IL1A,IL6,LHX2,LTA,MERTK,NFKBIZ,OASL,PADI2,PLA1A,PLAT,PLAUR,RILPL1,SLFN12L,TG,TNF,TNFSF8,ZC3H12A	1428 (18)
BAG1	1.004	other		1.147	5.22403	5.97e-06	BCL2,BCL2L1,BCL2L11,CCND1,CDH2,CDKN1A,EGFR,FOS,FRK,GADD45A,JUN,KLK3,MT2A,NEDD4L,NR3C1,PLAU,PTK2,PXN,RAB27A,SNAI1,TJP1,TP73,UAP1,VCL,VIM	2441 (22)
IL6ST	1.484	transmembrane receptor		1.147	4.36754	4.29e-05	A2M,AIM2,BCL2L1,CASP1,CCND1,CD44,CGAS,CSF1R,EGR1,ENPP2,HAMP,ICOS,IL1B,IL6,IL6R,IL7,IRF1,JUN,JUNB,NLRC4,NOTCH1,PIM2,RET,SERPINE1,SGCA,SOCS1,SOCS3,STAT3,STING1,TIMP1,TNFRSF1A,TNFRSF1B,TNFSF11,TRPA1,VCAM1	1628 (17)
BMP		group		1.145	1.91009	0.0123	DPYSL2,ERBB3,GATA4,HAND1,ID1,ID2,IL6,IRF1,MSX1,NKX2-5,RUNX2,SMAD1,WT1
SERPINE1	11.545	other		1.135	4.37779	4.19e-05	ACTA2,ALDH8A1,BCL6,CALR,CCL20,CDKN1A,CSF1,CSF3,CXCL10,CXCL2,CXCL3,CXCL8,DBP,DLG4,DUSP1,EGR1,FGF2,FLT1,FN1,FOS,GAP43,HGF,HLA-DQB1,IER3,IFNG,IL10,IL12B,IL6,ITGB3,JUNB,MVP,NFKB2,NFKBIA,PI16,PLAU,PLAUR,PRLR,SPON2,SYP,TLR2,TNF,VCAM1,VIM,ZFP36	1935 (17)
pravastatin		chemical drug		1.135	3.10458	0.000786	ABCA1,APP,CASP12,CAV1,CCL2,CCNE1,CD40,COTL1,CYP27A1,DMD,ENC1,FOXP3,ICAM1,IL10,IL1B,IL6,IMPACT,NOS3,P4HB,PALS2,PGF,PPARA,RHOU,SDC4,TLR4,TNF,VEGFA,VWF	1708 (21)
MTA1	-1.032	transcription regulator		1.135	1.32422	0.0474	ACKR3,ADRB2,AXIN2,BCAS3,BCL2L1,BRCA1,CCND1,CCND2,CDKN1C,EHMT2,EPHA2,MYH6,PIK3R1,PITX2,RRM2B,SLC16A10,SNAI1,STAT3,TNF
fluocinolone acetonide		chemical drug		1.134	4.66354	2.17e-05	ANGPTL4,ANOS1,BCL2L1,BMP3,BUB3,CDCA3,CXADR,HSD11B2,IFNG,IL1B,IL4,IL6,ITGA10,KIF2C,KIF4A,LIMCH1,MT1E,MT1F,MT1X,PCDH19,PDCD1,PER3,PIR,PRKCB,RGCC,RUNX2,SOCS3,TMEM14A,TNF,WNT4	1765 (11)
EIF2S1	1.042	translation regulator		1.134	2.38405	0.00413	ACP3,ADM2,ALDH1L2,CCND1,CCNE1,CEBPB,CFAP91,CH25H,CHAC1,DDIT3,DENND2D,EIF2AK2,GADD45A,GCLC,IFNG,MCL1,NUPR1,PLIN4,PRKN,SERPINA9,SESN2,SLC6A9,SLC7A11,TECTA	904 (12)
TCF3-PBX1		fusion gene/product		1.134	1.75449	0.0176	ARL4C,CCL1,KLK2,LCK,ST6GALNAC3,UGT2B15,USP17L2 (includes others),WNT16,ZAP70
D-sphingosine		chemical - endogenous mammalian		1.134	1.7167	0.0192	BCL2,CXCL2,IL4,IL4R,IL6,SERPINE1,TNF
VEGFD	2.568	growth factor		1.134	1.49214	0.0322	BCL2,BDNF,CCND1,DNMT3A,IL18,IL6,NPAS4
IDH1	1.521	enzyme		1.134	1.30803	0.0492	ABCA1,ABCG1,APOE,CREB3L1,DDIT3,EDEM1,EGR1,FBP1,FN1,GLI1,GLS2,GPT,HERPUD1,MAPK10,MX1,MYLIP,PPARG,RAB25,RUNX2,SERPINH1,TNF,VIM,ZEB2
hydrogen sulfide		chemical - endogenous mammalian		1.133	2.59517	0.00254	BCL2,BCL2L1,CD69,CXCL8,DDIT3,HSPA5,IL2RA,KLK3,SELL,TMPRSS2	1820 (17)
ZFAS1	-1.005	other		1.133	1.49214	0.0322	CDH2,KLF2,NKD2,SCD,SKA1,VIM,ZEB2
PLCG1	-1.44	enzyme		1.131	1.6968	0.0201	ALDOC,CCL2,CCND1,EGR1,FOS,IFNG,IVL,PECAM1,SERPINE1,THBS1
RNF111	1.242	enzyme		1.131	1.34486	0.0452	CDKN2B,PMEPA1,SERPINE1,SMAD7
SLC8A1	-11.528	transporter		1.131	1.34486	0.0452	EDN1,ICAM1,SLC8A1,VCAM1
OXTR	1.575	G-protein coupled receptor		1.129	2.82681	0.00149	CD36,ERBB2,FOS,HAMP,LIPE,PNPLA2,PRKCZ,RUNX2,TNFSF11	1663 (19)
NFIL3	-1.198	transcription regulator		1.129	2.68825	0.00205	CD36,CDKN1A,CXCL8,EOMES,GADD45A,GADD45B,HAVCR2,ID2,IFNG,IL10,IL12B,IL13,IL17A,PLIN4,PRNP,SCD,TNF,TNFSF10	2006 (21)
CCL2	2.557	cytokine		1.125	7.12148	7.56e-08	ABCA1,ABCG1,ACTA2,BCL2,BCL2L1,BIRC5,CCL1,CCL2,CCND1,CCR2,CD40,CD80,CD86,CEBPA,CEBPB,CEBPD,CXCL10,CXCL3,CXCL8,EGLN3,FOS,HTR2B,ICAM1,IFNG,IGF1,IL10,IL12A,IL12B,IL13,IL15,IL18,IL1A,IL1B,IL23A,IL32,IL4,IL6,ITGA1,ITGA5,KLF4,KRT5,MKI67,NCF1,NOTCH1,PAX9,PMCH,PPARG,SERPINE1,SOX2,STAT1,TIMP1,TNF,TP63,VCAM1,VEGFA,ZC3H12A	1066 (13)
trestolone		chemical drug		1.123	1.98716	0.0103	AR,BCL2,CCNA2,CCNG1,IGF1,PDGFRA,TGM4
1-(2,5-dimethoxy-4-iodophenyl)-2-aminopropane		chemical reagent		1.122	1.34486	0.0452	FOS,GNAQ,POMC,PRL
selumetinib		chemical drug		1.121	6.72816	1.87e-07	BCL2L11,BIRC5,CCND1,CD274,CDK5R1,CDKN1A,CSK,DDR2,EPHA2,EPHA4,ERBB2,ERBB3,FGFR1,FGFR3,FGFR4,FOS,FOSL1,FOSL2,FRK,GPNMB,ITGA2,JAK1,JAK2,JAK3,JUN,JUNB,LAMB3,LCK,LTK,LYN,MATK,MERTK,MITF,NTRK2,PKDCC,RET,RUNX2,SRMS,TNK1	1931 (18)
TCF		group		1.121	4.28735	5.16e-05	ABCB1,ADGRG2,AKAP13,APOD,ARL4A,BCL2,BCL2L1,BMP4,CCND1,CD44,CEACAM1,CTNNA2,DKK4,DPEP1,EGR1,EPCAM,F13A1,FGF18,FOS,GAD1,ID3,IDO1,IFITM1,IL1R1,IRS1,ITGA1,JUNB,KLK2,KLK3,KRT5,LEF1,LGALS3,LMO2,MMP7,MUC6,NRCAM,PCSK6,PLS3,RCN1,SERPINE1,SLC26A2,SOX9	1939 (17)
LGR5	-2.865	transmembrane receptor		1.117	1.53018	0.0295	AHR,AQP9,AXIN2,BCL2L1,BLVRB,GLUL,LHPP,OAT,SLC16A10,SLC22A1
EIF3E	-1.048	translation regulator		1.115	2.72354	0.00189	APLP1,BCL2L1,CCND1,CCNF,CD36,CD40,CDC34,CDCA8,CMTM7,COL18A1,CORO1C,FGF2,MAD2L1,PCDHGB1,PCDHGC3,PLAU,RIN2,SMC2,SNAI1,THBS1,ZEB2	2211 (24)
AMH	1.43	growth factor		1.112	1.91009	0.0123	ACVR1,BTG2,CDKN1A,CEACAM1,CXCL2,CYP17A1,CYP19A1,E2F1,IER3,IRF1,KLK3,RBL1,STAR
clopidogrel		chemical drug		1.111	5.77989	1.66e-06	ACKR3,AGRN,ALDH1L2,ATF3,BBS5,BMF,C1QTNF6,CCL2,CHAC1,CHD2,COL1A1,CTH,CXCL12,DDIT3,DHRS3,DUSP10,DUSP2,EDN2,EGFR,HERPUD1,HOXA3,HOXA5,IFIT1,LAMA5,LURAP1L,LYPD3,MATN1-AS1,NUPR1,PSAT1,RGS16,SESN2,SLC1A4,SLC3A2,SNHG12,SNHG17,STC2,VEGFA,XBP1	976 (7)
SPHK2	1.001	kinase		1.111	3.14813	0.000711	APP,CDKN1A,FYN,IFNG,IL13,IL6,KLF2,LYN,SPHK1,SPIB,SRC,STAT4,TCF4,TLR7,TLR9,TNF,YES1	1564 (16)
FGFR1	-3.608	kinase		1.11	3.51713	0.000304	ACHE,ATF6,BIRC5,BMP4,CCND1,CCND2,CDKN1A,COL1A1,DDIT3,DNAJC1,EBI3,EIF4E,EIF4EBP1,ENG,ERN1,FGF2,FGF5,FGFR1,FGFR3,FOS,HAMP,HES1,HGF,HSP90B1,HSPA5,IL6,ITGA1,ITGA10,ITPR1,JUN,KAZALD1,LIF,LOX,MSX1,NEUROG2,NOTCH1,OLFML2A,PCSK1,PDGFB,PDGFRA,PLAU,PLAUR,PLXNB2,POU2F2,PPARA,PTGS1,STAC3,TUBB3,ULBP1,VIM,XBP1	1891 (19)
isopentenyl diphosphate		chemical - endogenous mammalian		1.109	4.65561	2.21e-05	CCL3,CCL4,CCR1,CCR2,CCR5,CCR8,FOXP3,IFNG,IL2RA,TNF,VDR,XCL1	1276 (18)
A2M	8.268	transporter		1.109	3.00174	0.000996	ATF6,BCL2,CCL3L3,CCL4,CCND1,CDH2,CREB1,DDIT3,ERN1,FOXO1,GADD45B,GAP43,GRIN1,HSPA5,IL1B,IL6,LRP1,MAP3K5,PRLR,TNF,WNT5A,XBP1	1692 (20)
SLC22A5	1.147	transporter		1.107	3.14813	0.000711	ACADVL,ACVRL1,BMP4,BMP6,CDKN1A,HADH,IFNG,IL6,ITGB5,ITGB7,JUNB,LTBP4,PLAU,SMAD1,STAT1,TGFB3,TNF
Am 580		chemical reagent		1.105	4.23958	5.76e-05	ADM,APOD,CD1C,CD1D,CNR1,CXCR5,CYP51A1,DUSP1,HES1,IFNGR1,IRF1,ITGA6,LIPE,LSS,NTRK2,PLAT,PMVK,PPARA,PPARG,RARG,SCD,SOX9,SQLE,STRA6,TGM2,THBD,TIMP1,TNFSF11	1881 (22)
palmitoyl-Cys((RS)-2,3-di(palmitoyloxy)-propyl)-Ala-Gly-OH		chemical reagent		1.103	1.46725	0.0341	CXCL8,ICAM1,IL6,TLR2,TNF
GATA4	-9.136	transcription regulator		1.098	1.36151	0.0435	ACTG2,ADSS2,ARRDC2,ASS1,BCL2,BCL2L1,CCL2,CCL3L3,CCL4,CDC42EP3,CDCA8,CDKN2B,CNFN,COL1A1,CORIN,CXCL2,CXCR4,CYP17A1,CYP19A1,DDX4,DMRT1,DSCC1,EDN1,EPDR1,EPHB1,EPO,EPOR,ESPL1,ESPN,FABP6,FGF16,FGF2,FOS,GATA3,GATA4,GRHL3,HES1,HSPA5,ID1,IFI16,IGFBP5,IL6,IRF6,IRF8,JUN,KCNA5,KCNJ2,KLK3,LCT,LOC102724428/SIK1,LORICRIN,LRG1,LRRFIP1,LTBP2,MEF2C,MUC4,MYH6,MYH7,MYL4,MYLPF,NKX2-5,NOTCH4,NR5A1,NUSAP1,PDLIM3,PHKA1,…
IRF2	1.193	transcription regulator		1.097	7.45223	3.53e-08	ANG,ARCN1,B2M,BCL2,BNIP3L,C1S,CASP1,CCND1,CD274,CDKN1A,CEACAM1,CIDEC,CIITA,CMTM4,CTSS,CXCL10,DNAJB6,DST,DUSP5,E2F3,EIF2AK2,ERAP1,FCGBP,FXYD2,GBP1,HGD,ID1,IDH1,IFI35,IFNG,IL12A,IL12B,IL12RB2,IL1B,IL27,IL6,IL6ST,IL7,IRF1,IRF7,IRF8,ISG15,KLF4,MMP7,NAMPT,OAS1,OPN3,PSME1,PTGR1,RRBP1,SDC1,SLC51B,SLCO2B1,SOCS1,SRGN,TAP1,TAPBP,TLR3,TLR4,TLR5,TNFSF10,TNFSF13B,TXNRD1,UBE2L6,USP18,VCAM1	911 (15)
arsenic trioxide		chemical drug		1.095	5.44612	3.58e-06	ALOX5AP,ATF6,ATP1B1,ATP1B2,ATP6V1A,AURKA,BBC3,BCL2,BCL2A1,BCL2L1,BCL2L14,BLVRA,BLVRB,BNIP3,BNIP3L,CACNA1B,CALR,CASP10,CBR1,CCL2,CCND1,CCNH,CD44,CDC25B,CDC25C,CDC7,CDK1,CDK6,CDKN1A,COPB2,CTH,CXCL8,CYB5R1,CYP51A1,DDIT3,DEDD2,DHCR7,DNAJB11,DNAJB6,DNMT1,DNMT3A,ECT2,ETV5,FADS1,FAIM,FN1,GCLC,GCLM,GLI1,H2AX,HAT1,HSP90B1,HSPA2,HSPA5,HSPA8,HSPE1,HYOU1,IL17A,IRF1,ITGAM,ITGB1,KCNQ1,KDELR1,KIF11,LAMTOR3,LMAN…	2290 (23)
EP4-D		chemical reagent		1.095	4.29073	5.12e-05	ABCB1,ACVR1C,ALDOC,CCL19,CCR7,CD226,CD27,CTH,CX3CL1,CXCR3,CYSLTR2,EGLN3,GCLC,GIMAP8,HLA-A,HSH2D,IKBKE,IL12B,IL18,IL2RB,INPP5D,LCK,LTA,NPM1,PTPRF,RFK,SH2D1A,SLAMF6,SPN,TLE1
zVAD		chemical - protease inhibitor		1.094	1.35754	0.0439	CCL4,CXCL8,IL1B,IL6,SPHK1,TNF
ROCK1	1	kinase		1.091	2.32331	0.00475	APP,CCND1,CCND2,CD44,CNN1,COL1A1,COL6A2,E2F1,EDN1,ETS1,ICAM1,LAMA2,LAMC1,MYH7,VCAM1	1910 (18)
nizatidine		chemical drug		1.091	2.31605	0.00483	CREB1,CREB5,HRH2,PRKACB
FYN	2.604	kinase		1.091	1.82102	0.0151	CCL4,CMIP,CXCL10,DUSP1,EGFR,EGR2,FOS,FOXP3,IFNG,IL13,IL17A,IL1B,IL23R,IL4,IL6,NLRP3,NOTCH1,RORA,SOCS3,TNF
MASTL	1.08	kinase		1.089	6.15614	6.98e-07	ACVR1,ADSS2,ANLN,ARHGDIB,ASAP1,BMPR2,CCDC50,CDK1,CDK6,COPG2,CYP1B1,DLST,E2F3,EGFR,ESAM,GNG12,HYOU1,KYNU,LPP,MYH10,PACSIN2,RAB11FIP1,RDH11,SERPINE1,SLC2A3,TMPO,TTC38,TUBB6,VCL	1048 (7)
NKX2-1	-6.267	transcription regulator		1.089	4.55909	2.76e-05	BCL2A1,BDH1,BMP4,BTG3,CA4,CDKN2B,CEBPA,CHAD,CHIA,CKS1B,CLU,DCK,DPP4,EMP2,ENC1,ENPP2,EPHB1,ESAM,FAM3D,FGF8,FGFR4,GLCCI1,GNRH1,HCK,HLA-A,HMGB2,HS2ST1,IER3,IL7,LCK,LEF1,LMO3,LRG1,MATN4,MIA,mir-29,MREG,MTUS1,MYB,MYBPH,MYH11,NKD1,PC,PDGFRA,PFN2,PGM3,POMC,PRDM13,QSOX1,RAG1,RET,RNASE4,RRM2,SATB1,SCARA3,SCD,SEC14L2,SERPINB9,SERPINE1,SFTPA1,SH3PXD2A,SLC5A5,SMAD7,SNAI1,SOX2,TG,THBS1,THY1,TMEM37,TOX,TP63,TS…	1056 (7)
MAPK13	3.896	kinase		1.089	3.5784	0.000264	CDKN1A,CITED2,FOS,HAMP,IL10,IL12A,IL12B,IL1B,IL6,IVL,PRDX1,TNF,VDR,VEGFA	1879 (18)
ALOX15	-1.469	enzyme		1.082	6.47237	3.37e-07	ABCA1,ABCG1,AXIN2,BCL2,CCL3L3,CCL4,CD36,CXCL2,CXCR3,FN1,FOSL1,HAMP,ICAM1,ID3,IL12B,IL17A,IL1A,IL1B,IL6,JUN,NOTCH3,PPARD,PPARG,RGS2,TNF,VCAM1	1065 (13)
butaprost		chemical drug		1.081	3.1891	0.000647	CCL3L3,CCL4,CCR7,IL10,IL17A,IL1B,IL23A,IL23R,IL6,PTGER2,SOCS3,TGFBR3,TNF	1481 (17)
Focal adhesion kinase		group		1.081	2.62709	0.00236	BCL2,CDH2,CDKN1C,EFNB2,FZD4,ICAM1,ICAM3,IL6,KLK3,KRT18,KRT8,LPP,NEUROG3,PRRX1,SELL,VCAM1	1715 (18)
PPARD	-1.368	ligand-dependent nuclear receptor		1.079	7.66756	2.15e-08	ABCA1,ABCG1,ACACB,ACADVL,ACTA2,ADORA2A,ANGPTL4,APOE,AQP3,ASS1,BCL2,BCL2L1,BDH1,BIRC5,CCL20,CCL3L3,CCND1,CCND2,CCNE1,CD33,CD36,CD68,CDK1,CEBPB,CFAP54,CH25H,CLEC7A,CPT1B,CXCL2,CXCL3,CXCL8,CXCR2,CYB561A3,CYP27A1,CYP7B1,DET1,DHCR7,DHRS2,DNASE1L2,ECH1,ECI2,EGR1,FAM32A,FBP1,FCGBP,FLT1,FN1,GAS6,GCK,GHR,GLI1,GLI3,GPD1,GPD2,GPR183,HSD11B2,HSD3B7,ICAM1,IFI44L,IFNG,IGFBP2,IKBKE,IL10,IL12A,IL12B,IL17A,IL1B,I…	1530 (18)
ITCH	1.06	enzyme		1.078	3.10902	0.000778	CCNB2,CSE1L,DNMT1,DVL1,ELOVL5,FOS,FOXP3,IFNG,IL1A,IL1B,IL4,IL6,MCM6,NFATC1,RRM2,SLC2A3,TFRC,TNF,TNFRSF1A,TP63	1100 (16)
GSK3B	-1.007	kinase		1.076	5.76447	1.72e-06	APP,AR,BCL2,BCL2A1,BCL2L1,BIRC2,BIRC3,BIRC5,CCL2,CCND1,CCNE2,CD82,CDC25C,CDKN1A,CHD1,CSF2,CXCL8,DDIT3,DEFB4A/DEFB4B,DNMT3A,FOS,FOXM1,GATA4,GFI1,GLI1,H2AX,IFIT2,IFNG,IFT20,IL10,IL12B,IL13,IL19,IL1B,IL6,ISG15,KIF3A,LAMB1,MCL1,MYB,MYH6,NCOA1,NFATC1,NFKBIZ,NKX2-5,PDCD1,RORA,SERPINE1,SH3GLB1,SNAI1,SQSTM1,SYN1,TCF7L2,TNF,TNFRSF10B,TNFSF10,TNNC1,TP63,TRAF1,TUBB4A	1250 (12)
alpha-santalol		chemical reagent		1.073	2.31426	0.00485	BRCA1,CCNB1,CDC25B,CDC25C,CDK1,CDKN1A,CHEK1
Gm21596/Hmgb1		transcription regulator		1.073	1.63078	0.0234	CDKN1A,CXCL12,CXCL3,CXCR4,IL10,IL1B,IL24,IL6,PRL,SIGIRR,TLR4,TNF
CDKN2B	2.069	transcription regulator		1.072	2.03245	0.00928	ASS1,BCL2,CD80,CD86,CTH,DHFR,DNMT1,GLS,GLS2,GLUL,LOC102724788/PRODH,PSAT1,SERPINE1,SHMT1	1623 (21)
salmeterol		chemical drug		1.071	2.49485	0.0032	DUSP1,IL10,IL13,IL6,RGS2,SOCS3,TLR4,TNF,TSLP	1945 (17)
Ccl2		cytokine		1.07	2.9914	0.00102	CCL3L3,CCL4,CCR2,CCR5,CSF1,CTSB,CXCL10,CXCL2,CXCL3,ETS1,HGF,IFNG,IGF1,IL10,IL1B,IL23A,IL4,IL6,ITGB3,KLF4,PPARG,SDC4,SOX2,TBX3,TLR4,TNF,VCAM1	1188 (13)
TRB		transmembrane receptor		1.07	2.44612	0.00358	BCL2,CD4,CD44,CDKN1A,CXCR3,GATA3,IFNG,IL10,IL13,IL2RA,IL4,ITGAE,NT5E,SELPLG,TNF,TXLNA	1832 (17)
EPHA4	23.744	kinase		1.069	1.46725	0.0341	ACHE,APP,HAMP,IGF1,SHB
IgG-opsonized ovalbumin		chemical reagent		1.067	2.31605	0.00483	IL1B,IL6,TNF,VEGFA
HAO1	3.576	enzyme		1.067	1.71897	0.0191	CXCL8,HSPA5,IL1A,PDGFRA
TRIM27	1.061	transcription regulator		1.067	1.34486	0.0452	GPT,HAMP,IFNG,TNF
corticosteroid		chemical drug		1.065	1.79588	0.016	ACE,ARL4C,CALM1 (includes others),CD69,CETP,CXCL8,DEFB4A/DEFB4B,DUSP1,GAP43,GIMAP1,GNLY,HIPK2,IFNG,IL10,IL13,IL1R2,IL1RN,IL27,IL4,IL6,PPARG,PRDX1,PTGS1,SERPINB2,SNORD22,SRGN,SSR4,TDO2,TNF
conjugated linoleic acid		chemical drug		1.061	5.69037	2.04e-06	ANGPTL4,BCL2L1,CBS/LOC102724560,CCR5,CEBPA,CPT1B,CXCL8,CXCR4,DUSP1,FCGR2B,FOS,GCLC,GDF15,IFNG,IL10,IL10RA,IL10RB,IL1RN,IL4,JAK1,LTA4H,NFATC1,PPARG,PRDX1,SOCS3,TNF,TNFRSF11B	1232 (12)
celecoxib		chemical drug		1.061	4.36452	4.32e-05	ABCG2,AKT1,ALOX5,APP,AR,BCL2,BCL2A1,BCL2L1,BIRC2,BIRC5,BLK,CASP14,CCND1,CD68,CDKN1A,CENPF,CHEK1,DDIT3,DNAJB9,E2F1,FOS,GADD45A,GDF15,HSPA5,ICAM1,IFNG,IL13,IL1B,IL7,MAGI1,MCL1,MDM2,MKI67,PECAM1,PPARD,PPARG,SERPINE1,SLC25A4,SMN1/SMN2,ST3GAL4,TLR2,TLR4,TNF,TNFRSF10B,TNFRSF10D,TNFRSF1B,TNFSF12,TP63,TP73,TRAF1,TRAF4,TRAIP,VCAM1,WNT5A	1906 (15)
H1-6	-1.428	other		1.061	1.75449	0.0176	ATP6V0E2,B2M,BCL3,CAMSAP3,CBFA2T3,CD36,CD81,CPOX,CYTH1,DEGS2,DENND2D,DLG4,DUSP16,FANCI,FOS,GLUL,HAND1,HIRIP3,ICOSLG/LOC102723996,KIF21B,LYRM9,MAN2B1,MANBA,MAST1,MCM6,METTL22,OGT,PCBP4,PPT2,RILPL1,SGF29,TMEM53
H1f1		other		1.061	1.75449	0.0176	ATP6V0E2,B2M,BCL3,CAMSAP3,CBFA2T3,CD36,CD81,CPOX,CYTH1,DEGS2,DENND2D,DLG4,DUSP16,FANCI,FOS,GLUL,HAND1,HIRIP3,ICOSLG/LOC102723996,KIF21B,LYRM9,MAN2B1,MANBA,MAST1,MCM6,METTL22,OGT,PCBP4,PPT2,RILPL1,SGF29,TMEM53
arginine		chemical - endogenous mammalian		1.061	1.59517	0.0254	AXL,BCL2,BCL2L1,CD247,CXCL10,DDIT3,EGR1,GCH1,HSPA5,IFNG,IGF1,PIK3R1,SCD,TNF,UBA6-DT,XBP1
PLCG2	-1.173	enzyme		1.06	5.81816	1.52e-06	ACSL1,BCL2,BCL2A1,CCL2,CD36,CD68,CD9,CTSD,CXCL10,FGF2,FOXO1,H2AB3 (includes others),HLA-A,HLA-DQA1,HLA-DRB5,ICAM1,IFI16,IFIT2,IFIT3,IFITM3,IL10,IL6,ISG15,ITGAM,ITGAX,LPCAT1,MFGE8,MMP19,MS4A4A,NFATC1,NOX5,PLA2G4A,PLCG1,PTGES2,PTGS1,PTPRC,STAT1,STAT2,TNF,TNFSF10	1808 (18)
TXK	-1.182	kinase		1.06	1.98716	0.0103	CD44,EOMES,HAMP,IFNG,IL2RB,TBX21,TNF
ADORA2B	3.859	G-protein coupled receptor		1.059	1.40121	0.0397	BCL2,CCND1,CD86,CXCL2,CXCL3,CXCL8,HSD11B2,IL10,IL13,IL1B,IL4,IL6,KLF4,RUNX2,SERPINE1,TIMP1,TNF,VEGFA
MM-589		chemical reagent		1.055	1.60033	0.0251	CCDC80,CGNL1,COL1A1,FHOD3,IGFBP5,IL6,LOXL2,LOXL3,MYH6,MYH7,PDGFRA,PKP2,PLOD2,RND1,SORT1,SULF1,TNFRSF11B,TNNC1
IFNGR1	2.319	transmembrane receptor		1.054	4.33442	4.63e-05	BCL6,CCL1,CCL20,CCL3L3,CD38,CDC20,CLEC7A,COL1A1,CTSS,CXCL10,CXCL12,CXCL3,CXCR3,CYP27B1,DLX1,DNAJB2,ECH1,ECI2,FHL3,FN1,FSCN1,GATA4,GRM8,HCK,HMGA1,ICAM1,IDO1,IFI6,IFITM3,IFNG,IL17A,IL1A,IL1B,IL23A,IL6,IL6R,IRF1,IRF7,MITF,MX1,MYH7,NAT14,NDRG3,NEK3,NFKB2,PDGFRB,PLTP,PNPLA7,PRKAB1,RBP1,RUVBL2,SYVN1,TBL1XR1,TBX21,TCEAL7,TNF,TNFRSF1A,TTC5,TXNDC5,UBC,UCP2,XBP1	1474 (13)
ritonavir		chemical drug		1.05	4.88273	1.31e-05	ABCB1,ABHD2,ARHGEF19,AXIN2,BCL2L1,BIRC5,BMP1,C12orf42,CCND2,CCNJ,CD36,CEP70,CFL1,CSF2,CTNNAL1,CXCL8,CYP1A1,DHCR7,ECT2,ELK1,FGGY,GBP2,GRAP,HMGB3,HMGN2,HMMR,ICAM1,IKBKE,IL1B,IL6,KIF14,LAMA3,LIPE,ME1,MSMO1,MYB,NAGK,NCAPH,NEIL3,NOS3,NUF2,OSBP2,PADI2,PFAS,PPARG,RACGAP1,RDH11,RGS10,SCD,SKA3,SQLE,STYX,TESMIN,TMEM140,TNF,TSC22D3,USP13,USP18,VCAM1,VEGFA,WT1	2321 (22)
F3	1.149	transmembrane receptor		1.043	3.56543	0.000272	CARD9,CCL2,CXCL8,DOCK4,DUSP2,EGR1,FERMT2,FOS,FUT8,HAMP,HMGA2,ICAM1,IFNG,IL10,IL1B,IL6,ITGA2,ITGAM,LAMB1,LEF1,MAPKAPK3,MMP7,PODXL2,SEMA3A,SERPINE1,SPRY1,SPRY4,TGM2,TNF,UBASH3B,VCAM1,VEGFA	1056 (15)
1-palmitoyl-2-(5-oxovaleroyl)-sn-glycero-3-phosphorylcholine		chemical reagent		1.042	4.55129	2.81e-05	ACTA2,BCL2A1,BIRC2,BIRC3,CCL2,CCL20,CSF2,CXCL8,ICAM1,IL1A,IL1B,IL6,MYH6,NOS3,PECAM1,PMEPA1,SNAI1,TNF,VCAM1,VEGFA,VIM	1325 (17)
2,4-dinitrofluorobenzene		chemical toxicant		1.041	6.32239	4.76e-07	AKR1B1,CCL3L3,CCL4,CSF2,CXCL10,CXCL2,GCLC,HPGDS,ICAM1,IFNG,IL10,IL12B,IL13,IL17A,IL18,IL1B,IL24,IL4,NQO1,PPARA,PTGES,SLC7A11,TNF,TSLP	1744 (15)
ZNF395	4.768	transcription regulator		1.039	3.47496	0.000335	IFI16,IFI44,IFIT1,IFIT2,MEF2C,PEG10
PRKCH	1.275	kinase		1.039	2.31426	0.00485	CCND1,CDKN1A,HAMP,IVL,KRT5,LORICRIN,PRKD1	1731 (19)
poly dA-dT		chemical reagent		1.037	3.37161	0.000425	CGAS,CXCL10,CXCL8,ICAM1,IFIT2,IFNG,IL18,IL1B,IL6,IRF7,ISG15,NFKBIA,RSAD2,STAT1,TNF,VCAM1,ZBP1	1094 (17)
Lymphotoxin		complex		1.037	3.1891	0.000647	CCL19,CCL2,CSF2,CXCL10,CXCL13,CXCL8,ICAM1,IL1A,IL1B,IL6,TIMD4,TNF,VCAM1	1516 (14)
P2RX7	1.92	ion channel		1.036	3.29158	0.000511	CAPN2,CCL2,CCL20,CXCL10,IL1A,IL1B,IL23A,IL23R,IL6,NLRP3,TNF,TNFRSF1A,TNFSF10,TNFSF11	1078 (13)
pirinixic acid		chemical toxicant		1.033	4.34775	4.49e-05	ABCA1,ABCB4,ABCC3,ABCG2,ACACB,ACADVL,ACAT1,ACOT2,ACOT4,ACSL1,ACSS2,ALDOC,ANGPTL4,ANXA2,APOC2,APOE,APOM,AQP3,AQP9,ATP11A,BNIP3,BPGM,C3,CCL2,CCNA2,CCNB1,CCND1,CCNE1,CCT6A,CCT7,CD200,CD36,CD5L,CDH2,CDK1,CDKN1A,CEACAM1,CHAF1B,CHEK1,CIDEC,CLU,COL1A1,CPT1B,CTSB,CXCL12,CXCL3,CXCL8,CYP1A1,CYP27A1,CYP2J2,CYP7B1,DAD1,DECR2,DNAJB2,DPP4,ECH1,ECI2,EGFR,EHHADH,ELOVL5,ELOVL6,ENDOG,FADS1,FBP1,FBXO32,FKBP1A,FURIN…	1374 (16)
ADRB3	2.421	G-protein coupled receptor		1.033	2.92082	0.0012	ADRB1,ADRB2,CCL2,CXCL12,EGR1,FOS,IL1B,IL6,JUN,JUNB,S1PR2,TNF,UCP2	1590 (20)
S1PR1	-3.09	G-protein coupled receptor		1.028	3.48812	0.000325	CCND1,GATA3,HGF,ICAM1,IFNG,IGF1,IL1A,IL4,IL6,JUNB,NLRP3,TNF,VCAM1	1348 (18)
FBXO42	1.135	other		1.026	2.72354	0.00189	CSF1,CXCL8,ICAM1,IL6,STAT1,TNF,VCAM1	1524 (12)
COMMD3-BMI1	1.221	transcription regulator		1.026	2.72354	0.00189	CCL20,CCNE1,CDKN2B,CDKN2D,EBF1,HOXA1,HOXA10,HOXA3,HOXA4,HOXA5,HOXA6,HOXA7,HOXA9,HOXB3,HOXB9,HOXC4,IL6,LEF1,PEG3,PRKCA,WNT5A	1278 (7)
ANGPT2	14.336	growth factor		1.023	8.03339	9.26e-09	ABCA1,ACTA2,ADA,ARL4C,AXIN2,BCL2,BCL2L11,BCR,C1R,CALR,CCL3L3,CCT7,CD68,CD86,CDC34,CDKN1A,CEBPB,COL18A1,COL1A1,CRYBB3,CXCR4,CYP51A1,DDIT3,DNAJB4,EDN1,EGFR,EIF1,ETS1,FKBP10,FKBP2,FN1,GATA4,HSP90AA1,HSPA2,HSPA5,HSPD1,ICAM1,IL10,IL17A,IL18,IL1B,IL6,INPP5F,ITGAX,KDM6B,KPNA2,LIG4,LYN,MAPK10,MAPK12,MFGE8,MGMT,MGST1,MMP7,MYH6,MYH7,NCF1,NCOA2,NME1,NOS3,OLR1,P4HB,PDGFRB,PDIA3,PDIA5,PGAP1,PLAU,PPARA,PROS1,P…	1495 (16)
LIPG	-1.992	enzyme		1.021	2.3363	0.00461	ABCA1,BCL2,CCL2,CD36,CSF1,IL10,IL12A,IL1B,IL6,PLTP,TNF,VEGFA	1371 (18)
picryl chloride		chemical toxicant		1.019	1.84164	0.0144	CXCL10,CXCL3,HLA-DQA1,IFNG,IL1A,IL1B,IL4,TNF
D-fructose		chemical - endogenous mammalian		1.018	1.82102	0.0151	ACTA2,CD68,CEBPA,COL1A1,CXCL10,CXCL2,FN1,ICAM1,IL1A,IL1B,IL6,ITGAM,PPARG,SCD,SLC2A12,SLC2A5,SLC2A8,THBS1,TIMP1,TNF
DGKA	1.158	kinase		1.017	4.20971	6.17e-05	CCL2,CD69,CSF2,CXCL2,CXCL8,IL1B,IRF1,LIPE,TNF,WEE1	1332 (15)
TIGIT	-2.076	other		1.015	1.49214	0.0322	FGL2,GATA3,IFNG,IL10,IL13,IL4,TBX21
Notch		group		1.014	17.3206	4.78e-18	ABLIM1,ACTA2,ADAP1,ADM,BIRC5,CAPG,CARD9,CCL19,CD300LF,CDCA7,CDKN1A,CDKN2B,CKAP4,CNN1,CRIP1,CSF2RB,CSF3R,CTBP2,DLL3,DLL4,DTX1,DUSP1,EPCAM,FCGR2A,FCGR2B,FGF5,GADD45B,GAPT,GATA3,GIMAP1-GIMAP5,GUCY1A1,GUCY1B1,HES1,HES5,HESX1,HEY1,HEYL,HPSE,ID1,ID2,ID3,IDH1,IFNG,IL10,IL17RB,IL4,IL6,INPP5J,IVL,JAG1,KCNK6,LRRK2,LTB4R,LTBR,MCL1,MEX3A,MEX3B,MYLK,NCF1,NET1,NFAM1,NFATC1,NHSL2,NOTCH1,NOTCH3,PATZ1,PIK3R6,PLAU…	2131 (19)
PFKFB3	1.234	kinase		1.014	2.70115	0.00199	CDC25C,CDK1,CXCL12,CXCL2,FGF2,ICAM1,IL1B,IL6,PDGFB,TNF,VCAM1	2019 (18)
PIP5K1B	1.662	kinase		1.014	1.34486	0.0452	IL1B,IL6,PIP5K1C,TNF
METTL3	-1.098	enzyme		1.013	8.50724	3.11e-09	ACAD11,BTG2,CCL2,CCL22,CCL3L3,CD36,CD9,CDKN1A,CGREF1,CISH,CX3CR1,CXCL10,DCAF4,DCXR,DEF6,EI24,ESPN,ICAM1,IFIT2,IL1B,IL6,ITGAM,JAG2,JPH2,KCNJ4,KLF4,LTK,MCTP2,MGMT,MREG,MYBL1,NIPAL4,NLRP1,PERP,PIERCE1,PLTP,PTK2B,RB1,ROBO3,SERPINE2,SH3RF3,SOCS1,SOCS3,SYTL1,TBC1D8,TEX15,TIMP1,TMED10,TNF,TNFRSF18,TRAFD1,TRIM7,ZNF365,ZNF385A,ZNF423	1109 (18)
bafilomycin A1		chemical drug		1.012	3.52578	0.000298	ABCG2,AXL,BCL2L1,BST2,CD40,CD83,CD9,CXCL10,DDIT3,DLL4,FOXO1,GATA4,GRN,IDO1,IGF2R,IL1B,IL6,IRS1,KCNA5,NFKBIA,RHOB,SLC2A8,SQSTM1,TFRC,TNF	1754 (17)
sodium dodecyl sulfate		chemical drug		1.011	2.31426	0.00485	IFNG,IL1B,IL6,IVL,PRL,SERPINE2,TNF	747 (8)
SIRT6	-1.049	enzyme		1.01	3.22621	0.000594	ACTA2,AKT1,AKT3,ALG12,BIRC3,BIRC5,CD68,CIDEC,COL1A1,CSF1,CXCL8,CYP2C18,DBP,ELOVL6,FABP6,FBP1,FN1,HAAO,HMGA2,IDO2,IGF1,IGF2R,IL1A,IL1B,IL6,IRAK3,LIPH,LSS,NMNAT1,NPNT,PC,PLCB1,SCD,SERPINE1,SMAD3,TDO2,TNF	1948 (21)
creatine		chemical - endogenous mammalian		1.009	2.79588	0.0016	CKMT1A/CKMT1B,CXCL10,CXCL2,CXCL3,CXCL8,IL13,IL6,P2RX7,SLC6A8,TLR2,TLR3,TLR4,TLR7,TTN	2114 (20)
norepinephrine		chemical - endogenous mammalian		1.008	4.84466	1.43e-05	ABCA1,ADRA1B,ADRB1,APP,ATP7B,BDNF,CAMK1G,CCR2,CEBPB,CHST2,CITED4,CREM,CRY2,CSF1R,CXCL8,CXCR4,DUSP1,EDN1,EGR1,ELOVL6,EOMES,FGF2,FN1,FOS,FOSL2,FOXP3,GDF15,GEM,GMNN,GNRH1,GPD1,GRK5,HILPDA,ID1,IFNG,IL10,IL12A,IL12B,IL1B,IL27,IL4,IL6,IRAK2,KCTD3,LAMB3,LRRC73,LRRN3,MAN2A1,MCAM,MYH7,NAP1L5,NFKBIA,PADI4,PDE4B,PDE8B,PIGR,POMC,PPARG,PRKN,PTGES,PTPN21,RIBC2,SERPINE1,SGK1,SMAD7,SNAI1,TBC1D1,TC2N,TFRC,TNF,VEG…	1405 (11)
RUVBL1	-1.363	transcription regulator		1.006	2.05257	0.00886	AXIN2,CCND2,ETS1,GADD45B,H2AC20,H2BC12,KIFC2,MCM3,MNX1,NAE1,PLAC8,RBL1,SESN2,SLC39A7,SOCS3,SPACA9,TCF4,TRIM66,ZDBF2,ZDHHC9	598 (7)
NORAD	1.146	other		1.005	2.76195	0.00173	CHST11,COL6A2,DDIT3,FSTL3,GADD45B,HSPA5,ID3,IGFBP4,IL32,JUN,JUNB,LMCD1,PDGFA,RHOB,SDC1,SEC14L2,SGK1,SSBP3,THBS1,TNFRSF12A	1087 (9)
leukotriene C4		chemical - endogenous mammalian		1.004	3.76195	0.000173	APP,CCL2,CCL4,CXCL8,EGR1,EGR2,EGR3,FOS,ICAM1,IL13,TNF,VCAM1	1482 (18)
FAS	1.097	transmembrane receptor		1.003	17.7258	1.88e-18	ACTA2,ANXA2,ARFGAP1,ARHGDIA,ARL4A,ARRB2,BCL11A,BCL2,BCL2A1,BCL2L1,BIRC2,BIRC3,BIRC5,BTG3,BTN3A3,CCL2,CCL20,CCL3,CCL3L3,CCL4,CCR1,CCRL2,CD1D,CD200,CD22,CD44,CD80,CD83,CD86,CD93,CDC42EP2,CDK5R1,CDKN1A,CEBPD,CLTB,COL15A1,COL18A1,COL1A1,COL6A1,CREB1,CSF1,CTNND1,CXCL10,CXCL2,CXCL3,CXCL8,CXCL9,CXCR2,CXCR3,DNAH17,DUSP10,EFNA1,EGR1,EGR2,EPOR,F5,FCGR2B,FES,FGL2,FLOT2,FLT1,FOS,FOXO1,FSCN1,GBP1,GBP2,GNG7,GP…	1374 (12)
pyridaben		chemical toxicant		1	2.75945	0.00174	CACNA1E,CCDC88A,CCL19,CEBPD,DGKI,DMRTA2,ITGB8,KCNA2,KCNMA1,KIAA1217,KLF2,KLHL15,LAMC2,LRP4,MARCHF9,MBOAT2,MUC6,PIERCE1,SLC8A1,STON2,TUSC1,UNC13C,ZBTB44,ZHX3,ZNF580
SMAD1/5		group		1	2.72354	0.00189	CEBPB,HAMP,ID1,ID2,ID3,PDGFA,PLAUR
ethyl 2-{[(6,7-dimethyl-3-oxo-1,2,3,4-tetrahydro-2-quinoxalinyl)acetyl]amino}-4,5-dimethyl-3-thiophenecarboxylate		chemical reagent		1	2.49485	0.0032	BBC3,CDKN1A,FOXG1,HGF,MAP2,MDM2,PLAT,SYN1,TUBB3
Calmodulin		group		1	2.48812	0.00325	BCL2,BDNF,CD44,CORO6,CPNE5,CTXN1,DLG3,DLG4,DOC2B,EPHB6,GALNT9,ICAM5,LGI3,LINGO1,MYLK,NOS1,NPAS2,NSF,RAB40B,RIMBP2,SEZ6,SYT1,TIAM2,TSPAN2,VAMP1,YPEL2	1835 (19)
behenic acid		chemical - endogenous mammalian		1	2.31605	0.00483	IL10,IL1B,IL6,TNF
cerotic acid		chemical - endogenous mammalian		1	2.31605	0.00483	CD40,CD80,IL1A,IL1B
MELTF-AS1	-3.589	other		1	2.31605	0.00483	ANXA8/ANXA8L1,CKS1B,GOLM2,SETD7
BAG2	-1.164	other		1	2.31605	0.00483	CTSB,IL1B,IL6,TNF	2127 (27)
HLA-E	1.254	transmembrane receptor		1	2.31605	0.00483	IFNG,IL13,IL4,TNF	703 (7)
IL20RA	1.804	transmembrane receptor		1	2.31605	0.00483	CXCL8,ICAM1,IL10,IL18	1091 (12)
ORM1	3.576	other		1	2.22475	0.00596	HAMP,IL1B,IL1RN,IL6,TNF	2039 (20)
mir-486		microRNA		1	2.21396	0.00611	ADARB1,AFF3,CREBL2,DCBLD2,FOXO1,FOXP1,SLC10A7,SLC4A8,UBASH3B,WDFY3,WT1
NPPC	5.304	other		1	2.21183	0.00614	CDH2,CHST11,CHST3,EDN1,GUCY1A1,GUCY1B1,NOS3,PPARG,XYLT1	1011 (7)
beta-1,3-glucan		chemical drug		1	1.84164	0.0144	FGF2,IL12B,IL6,ITGB3,PDGFA,PDGFB,TNF,VEGFA
trimethyltin		chemical reagent		1	1.78781	0.0163	FOS,IL6,P2RX1,SYN1,TNF
TRA		transmembrane receptor		1	1.78252	0.0165	BCL2,CDKN1A,CXCR3,IFNG,IL10,IL12B,IL2RA,IL4,ITGAE,SELPLG,SOCS3,TNF
pegintron		biologic drug		1	1.71897	0.0191	CXCL10,ISG15,RNF125,USP18
chlorine		chemical toxicant		1	1.71897	0.0191	ALOX5,ALOX5AP,LTC4S,SOD1
RIDA	1.061	enzyme		1	1.71897	0.0191	IFNG,IL10,IL4,TNF
LOC102724788/PRODH	3.937	enzyme		1	1.71897	0.0191	LOC102724788/PRODH,NFATC1,TNFRSF10B,TNFSF10
TAS2R14	-1.111	G-protein coupled receptor		1	1.71897	0.0191	CXCL8,HAMP,IL6,TNF
Snhg8		other		1	1.71897	0.0191	IL1B,IL6,SATB1,TNF
Tlr12		other		1	1.71897	0.0191	CXCL8,IL1B,IL6,TNF
AP3D1	1.271	other		1	1.71897	0.0191	IL1B,IL6,SLC30A3,TNF
KIDINS220	-1.021	transcription regulator		1	1.71897	0.0191	CD69,EGR1,FOS,IFNG
CD6	-1.668	transmembrane receptor		1	1.71897	0.0191	FOXP3,IFNG,IL6,TNF
SH42		chemical reagent		1	1.71444	0.0193	AKT1,CD36,CMKLR1,GAB2,HSH2D,IL10,IL6,MERTK,PIK3R1,PRKCA,PRKCB,PRKCE,PRKCZ,RPS6KA6,STAT1,TIMD4
ANGPTL3	-1.023	growth factor		1	1.59176	0.0256	ACACB,ACSS2,AGRN,ELOVL6,HSPG2,SCD
PLA2G2A	-1.023	enzyme		1	1.56703	0.0271	CD44,CD69,CXCL8,IL6,ISYNA1,PLA2G4A,PLCD1,SLC27A1,SLC27A2
double-stranded DNA		chemical - endogenous mammalian		1	1.49214	0.0322	CD40,CXCL10,ICAM1,IL6,IRF7,ISG15,SOCS3
ATF7	1.141	transcription regulator		1	1.46725	0.0341	DDIT3,DUSP1,DUSP10,DUSP5,DUSP8
S1PR4	-2.513	G-protein coupled receptor		1	1.43771	0.0365	ACKR2,ACTG2,ADORA2B,C1R,C1S,CFAP54,CSF2RB,CXCL2,DAAM2,EPHB1,HTRA3,IFI16,IL6,LTBP2,MOXD1,MPZL3,P2RX1,SERPING1,SHROOM3,SPRY1,WDFY1
corticotropin		biologic drug		1	1.34486	0.0452	FURIN,NR5A1,PCSK6,SUMO3
obinutuzumab		biologic drug		1	1.34486	0.0452	CCL3,CCL4,IFNG,TNF
coxsackievirus A21		biologic drug		1	1.34486	0.0452	CD274,CXCL10,CXCL9,LAG3
psychosine		chemical - endogenous mammalian		1	1.34486	0.0452	FOSL1,IL1B,IL6,TNF
GNAZ	1.153	enzyme		1	1.34486	0.0452	CCL4,CXCL10,IFNG,POMC
OPRK1	-6.752	G-protein coupled receptor		1	1.34486	0.0452	FOS,HAMP,PLXND1,SLC6A4
Snhg20		other		1	1.34486	0.0452	ACTA2,COL1A1,FN1,LGALS3
ANKHD1/ANKHD1-EIF4EBP3	1.149	other		1	1.34486	0.0452	CCND1,KLF4,mir-29,VEGFA
CAMP	1.28	other		0.986	8.67162	2.13e-09	AHR,BCL2,BCL2L1,BMP1,C5AR1,CCL2,CCL20,CCL3,CCL4,CCR7,CD80,CD83,CD86,CSF1,CSF2,CSF3R,CXCL10,CXCL13,CXCL3,CXCL8,CXCR2,CXCR4,ENDOG,FGF2,HBEGF,ICAM1,IFNG,IL10,IL12A,IL12B,IL17A,IL18,IL1A,IL1B,IL1R2,IL1RAP,IL1RL2,IL1RN,IL23A,IL36G,IL37,IL4,IL6,IRF8,ITGAM,ITGAX,MCL1,MYCL,NOTCH4,PDGFRB,SNAI1,STAT1,TBX21,TLR2,TLR4,TNF,TNFAIP2,TNFAIP3,TNFSF13B,XCL1	1210 (17)
NFAT (complex)		complex		0.984	1.91009	0.0123	AIF1,ATF3,CCL2,CD68,CD86,ICAM1,IFNG,IL4,IL6,SERPINE1,SLC1A3,TMED10,TNF
amphotericin B		chemical drug		0.983	2.90658	0.00124	CCL2,CCL4,CXCL8,GDNF,IFNG,IL1B,IL1RN,IL6,TIMP1,TNF	1305 (15)
HEIH	1.073	other		0.981	4.95078	1.12e-05	AKT1,BCL2L1,CACNA1H,CACNB2,DUSP1,FGF2,FGFR1,FOS,GADD45B,HSPA2,IGF1,JUN,MEF2C,NTRK2,PDGFC,PDGFRB,RRAS,STMN1,TGFB3	1697 (12)
LIPE	-1.792	enzyme		0.981	2.22185	0.006	ABCA1,ACSL1,ACSS2,ATF3,BCL2,BCL6,CA2,CD36,CEBPA,CEBPB,CIB2,CITED2,COL1A1,CPT1B,EDN1,EGR1,ELL,FOS,G0S2,GAPDH,GPR3,H3-3A/H3-3B,HLA-DQA1,ID2,IL1B,IL6,ITGA6,JUP,LYL1,MAPKAPK2,MEF2C,NCOA2,NET1,NRIP1,PAM,PC,PDE8A,PPARA,PPARG,PRDX2,RB1,RGS5,RRAD,RUNX2,SCARB2,SCD,SDC4,SMAD7,SOX18,ST3GAL5,ST8SIA4,STAR,TNF	1618 (20)
B2M	1.551	transmembrane receptor		0.977	2.00043	0.00999	AKT1,CCL3L3,CSF2,FCGRT,HLA-A,HLA-DQA1,HLA-DQB1,HLA-DRB5,HLA-E,IFNG,IL1B,IL4,IL6,MEF2C,TAPBP	1568 (18)
KEAP1	-1.075	transcription regulator		0.976	3.73283	0.000185	AHR,BCL2,DCSTAMP,GBE1,GCLC,IFNG,IL10,IL17A,IL18,IL1B,IL4,IL6,MST1R,NQO1,OSCAR,PHKA1,PPARG,PRDX1,TBXAS1,TNF,TOP2A,VCAM1	1342 (17)
ACAN	7.183	other		0.975	1.71897	0.0191	FOXP3,IFNG,IL10,TNF
PIEZO1	1.043	ion channel		0.975	1.34486	0.0452	CD69,IL2RA,IL6,VCAM1
3-methyladenine		chemical toxicant		0.974	2.85387	0.0014	ACTA2,BCL2,CCNA2,CCNB1,CD40,CD80,CD86,CXCL2,CXCL8,HSP90B1,HSPA5,IL10,IL12B,IL13,IL1B,IL23A,IL4,IL6,RCAN1,RUNX2,S100A10,SNAI1,SOX2,SQSTM1,TNF,TP73,VIM	1196 (13)
IHH	-1.028	enzyme		0.973	4.6517	2.23e-05	BMP4,CBFB,CCDC85A,CCND1,CD72,CHST11,CMA1,COL27A1,COL2A1,COL9A3,CPT1B,CXCL10,DLX1,DQX1,EREG,FGFR3,FLT1,FOXD2,FZD1,GLI1,GPR34,HSD17B7,IL18,IL6,LPAR4,MEF2C,NR2F2,PECAM1,PLIN4,PTHLH,RUNX2,SHOX2,SKA1,SLC26A2,SMO,SPATA24,SRD5A3,TCF7L2,TMEM169,TMEM182,TMEM67,TNF,TNFRSF11B,VEGFA
MYO6	-2.098	other		0.973	4.36957	4.27e-05	ACTA2,ACTG1,ATF3,B2M,BACH2,CDC42BPA,COL6A2,DNAJB4,DUSP1,DUSP5,EGR3,ERRFI1,GAB2,HES5,HOMER1,IER3,IGFBP7,ITGB3,KLF9,LBH,MAN2A2,MSRB3,MYL9,NFKBIZ,NLGN2,NPAS4,NR6A1,PDGFA,RASA4,RHOB,SCIN,SDC4,SEMA3A,SLC44A2,STX11,SYNPO2,TNK2,ZDHHC14,ZMAT1	2183 (18)
MAZ	-1.465	transcription regulator		0.971	4.50446	3.13e-05	ATF3,CAV1,CCL22,CCL25,CDKN1A,CSF2,CX3CL1,CXCL2,DNAJC3,FKBP11,HAMP,HSP90B1,IL12A,IL15,IL1RN,IL23A,IL32,LTA,MAZ,PDIA4,PPARG,SOD1,STAT3,TNFSF10,TNFSF8	2083 (16)
NR2F1	1.032	ligand-dependent nuclear receptor		0.97	1.82391	0.015	CCL22,CYP19A1,EGR1,EPO,GDF15,HES5,HGF,HNF1B,ID2,IL10,IL17A,IL32,IL37,JAG1,LFNG,POMC,POU5F1,PRRX1,SPRY1,SPRY2,TP63,XCL1
CDKN1C	3.329	other		0.97	1.59176	0.0256	CASP14,CCND1,CDKN1C,E2F1,RB1,RBL1
estradiol-17beta-benzoate		chemical reagent		0.969	5.45593	3.5e-06	ABCA4,ACE,ALOX5AP,BDNF,BRINP2,CALML4,CBLN2,CCDC85B,CCND1,CCNE1,CHGA,CHGB,CHST11,CLIC6,COL1A1,COL2A1,CRABP1,DOCK5,ENPP2,EPCAM,ETS2,EZR,FKBP2,FOSL2,GALNT18,GALNT6,GBP6,GLS,GLUL,GRAP,GRIN1,GSTM3,H2AJ,HLA-A,HLA-DQA1,ICAM5,IGFBP2,INF2,ISLR,JAK3,KCNH3,KCNJ13,KISS1R,LAMB1,LAMB3,LORICRIN,MAD2L1,MFGE8,MRC2,MSX1,NDUFB10,NECTIN1,NET1,NXPH3,OXTR,PCSK1,PCSK1N,PCSK6,PNOC,POMC,POU2F1,PROCR,PTER,PTPRG,RAB37,RBMS…	953 (7)
ATM	1.208	kinase		0.968	3.27327	0.000533	ALKBH8,BBC3,BCL2L1,BIRC2,BLM,CCND1,CDC25C,CDKN1A,CDKN2D,CHEK1,CHEK2,CLU,CXCL8,DUSP1,DUSP10,FDXR,FN1,GADD45A,GADD45B,H2AX,HSP90AA1,HSPE1,IL6,IRF1,JUN,PPP2R2C,RRM2,SERPINE1,SLC32A1,TGM2,TNFAIP3,TNFRSF10B,TNFSF9	1886 (15)
PADI2	3.723	enzyme		0.967	2.38195	0.00415	ACTA2,COL1A1,CXCL2,CXCL3,CXCL8,FN1,IL6,let-7,mir-29,MKI67,RAB6B,SNAI1,TNFRSF1B,VIM	1805 (17)
ELF1	-1.244	transcription regulator		0.965	1.61439	0.0243	CD1D,CD247,CD4,CDK11A,CITED2,ERBB2,FES,IFNG,IL10,IL2RA,IL4,SPI1,TLR9
PPP3R1	-1.039	phosphatase		0.965	1.3851	0.0412	ABCA3,ACOXL,ACTR3B,ADRB2,BAG3,BCL3,CACNB2,CCND2,CDH17,CLIC5,CPT1B,GBP3,GIMAP4,GTSF1L,LTA,LYNX1,MYH7,NCKAP1,PDE9A,PPARA,SCD,SFTPA1,SLC8A1
BLVRA	2.367	enzyme		0.963	1.88273	0.0131	C5AR1,CXCL10,JUN,PPARA,TNFRSF10B,TNFSF10
maneb		chemical toxicant		0.962	2.48017	0.00331	BCL2L1,CACNA1E,CCDC88A,CCL19,CEBPD,CYP1A1,DGKI,DMRTA2,ITGB8,KCNA2,KCNMA1,KIAA1217,KLF2,KLHL15,LAMC2,LRP4,MARCHF9,MBOAT2,MUC6,PIERCE1,SLC8A1,STON2,TUSC1,UNC13C,ZBTB44,ZHX3,ZNF580
NEDD9	2.928	other		0.961	1.31966	0.0479	ADM,ALOX5,AOAH,APP,AURKA,BNIP3,CD44,ELF3,ERRFI1,FHAD1,FOS,GDF15,ITGA2,LIN7A,LRP1,MACROD2,MKNK2,NAAA,NRN1,PAX8,PLAC8,PLOD2,PPP1R3B,PPP2R2C,RPGR,SERPINE1,SLC14A1,SLC1A1,SPA17,TENT5A,VIM
IRF4	1.119	transcription regulator		0.958	17.7959	1.6e-18	ADA,AICDA,ALPK2,B2M,BCL6,BIRC3,BNIP3,CASP10,CCL1,CCL20,CCNB1,CD28,CD68,CDK1,CDK6,CEMIP2,CIITA,CSF2,CTSS,CX3CR1,CXCL10,CXCL3,CXCL9,CXCR4,DDIT3,ELL2,EOMES,ERBB3,EZR,FAIM,FCER2,FLT1,FOXP3,GALNT2,GATA3,GBP1,HSPA8,IFI27,IFNG,IKZF2,IL10,IL12A,IL12B,IL12RB1,IL13,IL15RA,IL17A,IL17RA,IL18RAP,IL1B,IL1R1,IL1RN,IL23R,IL2RA,IL4,IL6,IL7R,INPP4B,INPP5D,IRF1,IRF5,IRF7,IRF9,ISG15,ISG20,ITGB1,JAK2,LEF1,MANF,MAPK9,…	1562 (14)
triamcinolone acetonide		chemical drug		0.958	14.118	7.62e-15	ACSL1,AKAP13,ALDH5A1,ANGPTL4,ANOS1,AP3S1,AQP3,ARL4C,ATF3,ATP10A,AUH,B4GALNT1,BCL2,BCL2A1,BCL2L11,BMP4,BMP6,BTG2,CAPG,CASP4,CCDC6,CD22,CD44,CDC5L,CHL1,CTH,CXADR,CYTIP,DCBLD2,DDIT3,DNA2,DUSP1,DUSP10,E2F2,EDNRA,EFNB2,EGR1,ELK1,ELK3,EPHA4,FOS,FUS,FUT4,HCK,HFE,HIPK2,IER2,IGFBP4,IL6ST,INSIG1,IRF7,ITGA10,JUN,JUNB,KCND1,KIF4A,KLF10,KLF9,MT1E,MT1F,MT1X,MT2A,NFKBIA,NOS1,NR3C1,OSBP,PCDH19,PDIA5,PER3,PEX6,PF…	1983 (19)
MIA	8.619	other		0.958	1.46725	0.0341	CDH2,FN1,ITGB3,MIA,PLAT
PARK7	-1.11	enzyme		0.956	3.1798	0.000661	AR,CCL3L3,CXCL8,EGFR,FN1,ICAM1,IFNG,IL12B,IL1B,IL23A,IL6,NES,NOTCH1,PDCD1,POU5F1,RET,SOX2,TNF,VIM	1906 (15)
LEPR	-1.217	transmembrane receptor		0.954	2.284	0.0052	ABCG1,ACTA2,ANGPTL4,ANXA5,APOE,ATF3,BCL2,BCL2L1,BTG1,CCL3L3,CD68,CNR1,CNR2,COL1A1,CREB3L2,DDIT3,EDN1,EIF4EBP1,FN1,FOS,FYB1,GADD45B,GAP43,GATA4,GCK,GNRH1,H2AZ2,HSPA5,ID2,IDO1,IGF1,IL17A,IL18BP,IL1R2,IL1RN,IL24,IL6,ITGAM,LGMN,LIF,LMAN1,mir-223,mir-24,MMP19,MMP7,MTTP,PC,PHLPP1,PLCB3,POMC,PPARA,PPARD,PPARG,PRL,SERPINE1,SMARCD3,SOCS2,SOCS3,STAT2,STAT3,TCF7L2,TIMP1,TNF,TNFRSF4,TRPV1,TSC22D3,UCP2,VGF	1756 (21)
APBB1	-1.671	transcription regulator		0.954	2.21183	0.00614	ACTA2,APP,CASP4,CCND1,CD82,EGFR,HES1,TP73,VLDLR	1551 (12)
mir-873		microRNA		0.954	1.88273	0.0131	CCL2,CDK3,CXCL3,IL6,TNF,TNFAIP3
AI-1		chemical reagent		0.954	1.59176	0.0256	AKR1C1/AKR1C2,GCLC,GCLM,GLS,IDH1,SLC7A11
linalool		chemical - endogenous non-mammalian		0.953	1.53018	0.0295	ACSL1,DHCR7,HSD3B7,IL6,PPARA,SLC27A4,SOD1,SQLE,STAT3,UCP2
MMP8	4.194	peptidase		0.952	1.75449	0.0176	CCL3L3,COL1A1,CXCL10,CXCL8,HGF,IL10,IL6,NR3C1,TNF
folic acid		chemical - endogenous mammalian		0.951	3.36957	0.000427	ABCG2,ACTA2,APP,BCL2,BCL2L1,CDKN1A,CERS6,CLU,COL18A1,COL1A1,CYP1A1,DDIT3,DNMT1,FN1,FZD1,HDAC6,HGF,HOXA1,IFI27,IFI6,IL1B,JUN,LGALS3,LGALS9B,NLRP3,NOS3,PECAM1,PITX2,PTHLH,SFRP1,TNF,UNG,VCAM1,WNT4,WNT6	1813 (15)
ciglitazone		chemical drug		0.949	4.66154	2.18e-05	ABCA1,ABCA12,ABCG1,ACTA2,APOE,AQP3,BCL2,BCL2L1,BRIX1,CAV1,CCL2,CCND1,CD34,CD36,CDK1,CDKN1A,CIITA,CSPG4,CXCL8,CYP19A1,EOMES,FGF5,FLT1,FN1,GPD1,GRB7,HGF,ICAM1,IFITM2,IFNG,IGFBP2,IL10,IL12B,IL4,IL6,IVL,KLK3,LAMA1,LAMB1,MITF,MNX1,MPO,MUC1,MXD1,NFKBIA,OLR1,PAX6,POU5F1,PPARG,PTGER2,PTGER4,SERPINE1,SFTPA1,SOD1,SYCP3,TNF,TNFSF10,TUBB3,VCAM1,WT1	1424 (18)
BB-Cl-amidine		chemical reagent		0.946	1.34486	0.0452	HMGA1,IGF1,let-7,mir-29
UCN	2.217	other		0.943	1.50585	0.0312	CXCL3,CYP17A1,FOS,ICAM1,IFNG,IL1B,IL6,PLA2G6,STAR,TLR4,TNF
CD47	1.026	transmembrane receptor		0.942	3.03058	0.000932	CCL19,COL1A1,CSF1,DCSTAMP,FCER2,IFNG,IL10,IL12RB2,IL1B,IL6,IL7,NFATC1,OSCAR,SIRPA,TNF,TNFSF11	1576 (15)
EFNA5	-1.97	kinase		0.937	1.82102	0.0151	ABCA12,ADAMTS4,APOBEC3G,BDNF,DCBLD2,EGFR,EREG,ETV5,FOSL1,IRF1,IRF7,KRT18,NOS1,NT5E,PKP1,PLAT,PTHLH,SLC20A1,SOX9,TNFAIP6,UBE2C
DRD2	-2.357	G-protein coupled receptor		0.935	5.57187	2.68e-06	BDNF,CCL2,CCR8,CSF1,CSF1R,CSF2,CXCL13,CXCL2,CXCL3,EDNRB,FOS,FOSL2,GAD1,IGF1,IGF2R,IL1B,IRAK1,ITGB8,JUN,KCNJ2,KCNJ4,KLK3,LIPE,LTB,NAT8L,NFKB2,NFKBIA,PCSK1,PDCD1,PMEPA1,PNPLA2,POMC,PRL,PRLR,SERPINE1,THBS1,TNFRSF1A,TNFSF11,TNFSF14,TPP1,TRAF1,TUBB6,VCAM1,VEGFA	1742 (17)
reserpine		chemical drug		0.935	1.43533	0.0367	ADRB2,CHGA,CNR1,EGR1,FOS,IL18,IL1B,SLC6A4
NGFR	-1.425	transmembrane receptor		0.932	3.10902	0.000778	A2M,APP,BDNF,CCNA2,CCND1,CCNE1,DHCR7,DMD,FOS,GRIA3,HPSE,IL10,IL1B,JUN,PLAT,RB1,RHOB,SERPINE1,SORT1,TNF	1865 (17)
SST	-1.992	other		0.93	3.65365	0.000222	ABCB1,APP,BCL6,CCND1,CCNE1,CORT,CUX2,FOS,GCGR,GHR,IFNG,IGF1,IL10,IL1B,IL6,ITPR2,NR3C1,PRL,PRLR,RXFP3,SSTR2,SSTR3,TOX	1441 (19)
MFAP5	-1.131	other		0.929	9.18842	6.48e-10	APLN,BAIAP2L2,BLOC1S5-TXNDC5,CCL3,CCL3L1,CDH2,COLEC11,CRELD2,CYS1,DLL4,DUSP1,ERBB3,ESPL1,F2R,FBXO2,FBXO43,FBXO5,GIPC3,HSPE1,IL23A,IL24,ITGA7,ITGB3,KIF11,KIF4A,MKI67,MRAS,MYLIP,NOTCH2,PECAM1,PLA2G4C,PPIH,SDF2L1,SPON2,TFPI,UBE2C	708 (7)
TAF6	-1.062	transcription regulator		0.928	3.25806	0.000552	ATF3,BCL11B,C11orf24,CDKN1A,GADD45A,GAPDH,GCNA,HAMP,HES1,HOXA9,IFFO1,IRF1,JUN,MIR22HG,PRDM10,SNHG12	1161 (7)
calmidazolium		chemical drug		0.928	1.59176	0.0256	EGR1,FN1,FOS,SELL,SOX9,VCAM1
HCAR2	53.168	G-protein coupled receptor		0.927	4.20412	6.25e-05	CCNE2,IL12B,IL1B,IL23A,IL6,KIF14,KIF20A,NMI,PLK1,PLK4,SLC37A2,TNF,WEE1	1327 (16)
1-chloro-2,4-dinitrobenzene		chemical drug		0.927	2.67778	0.0021	CCL20,CCL4,GCLC,GCLM,IL19,IL1B,IL1R2,IL24,IL6,NQO1,SLC7A11,TNF,TXNRD1	1017 (10)
Sphk		group		0.927	1.78781	0.0163	CCL2,IL6,MBTPS1,TNF,VCAM1
evodenoson		chemical drug		0.927	1.34486	0.0452	CXCL8,IFNG,IL10,TNF
BTNL2	1.527	transmembrane receptor		0.926	9.70333	1.98e-10	ACTR3B,APPL2,CDKN2C,CHD7,CNN3,CSF2,CYP2S1,EMB,EPCAM,FGL2,FOXP3,GBP3,GBP4,GJB2,GPD2,GPR34,IFITM3,IFNG,IFNGR1,IGFLR1,IKZF2,IL17A,IL4,IL6,ITGAE,KCNK6,LDLRAD4,MBNL3,MXD1,MYO10,N4BP1,NCOA7,NT5E,PHLPP1,PLXDC1,PRXL2A,RRAGD,S100A4,SELL,SEMA4F,SPECC1,ST14,TNF,TNFRSF1B,TNFSF10,YPEL2	1925 (21)
benzo(a)pyrene		chemical toxicant		0.924	3.56543	0.000272	ABCB1,ABCB6,ABHD4,ADAMTS16,AHR,ALG2,ANXA1,ARHGDIA,BBC3,BCL2,BCL2L11,BIRC5,BLK,BRAF,BRCA1,BTG3,CCL1,CDC25B,CDK14,CDK5R1,CDKN1A,CKS1B,CRADD,CYB5A,CYP1A1,CYP1B1,ECT2,ELF3,EREG,FGFR3,FOS,FYN,FZD1,GCLC,GCLM,GNAI1,GNAQ,GSTM1,IER3,IGF1,IL1B,IL1RAP,ITPR1,JUN,KLF2,MAD2L1,MAFG,MAP2K6,MDM2,ME1,MPO,NAPB,NBEA,NMI,NOS3,NQO1,NR5A1,NUDT16,NUMBL,PDLIM1,PLCB1,PPP1R3C,PRKCA,PRKD1,PTGER2,PTPRG,RAP1GAP,RGS5,RHOC,SEMA…	2149 (23)
SKP2	-1.191	other		0.924	2.64207	0.00228	BBC3,CCND1,CCND2,CCNE1,CDH2,CDKN1A,E2F1,FOXP3,IL13,IL4,NFATC4,PAX8,POU5F1,PTMA,S100A4,TP73,USP18,VIM,ZEB2	2107 (23)
rolipram		chemical drug		0.923	2.52143	0.00301	ANXA1,BCL2L11,BDNF,CCL2,CD80,CD86,CXCR4,DUSP1,FOS,IFNG,IL10,IL1B,IL27,IL6,NTRK2,PDE4B,SYNPO,TNF	1434 (17)
miR-148a-3p (and other miRNAs w/seed CAGUGCA)		mature microRNA		0.923	1.96658	0.0108	ACTA2,COL1A1,DNMT1,DUSP1,EGFR,IL6,RPS6KA5,TNF,UBASH3B
methotrexate		chemical drug		0.921	7.81531	1.53e-08	ABCA1,ABCD1,ACACB,ACADVL,ACO1,ACSS2,ACTG1,ADORA2A,AK4,ANKH,ANXA4,ASS1,AUH,BDNF,BNIP3L,BTG2,C1R,C3,CASP4,CCL19,CCL2,CCL25,CCL3,CCL3L1,CCL4,CCND1,CCNG1,CD28,CDKN1A,CLEC11A,CLN8,CR2,CSF1,CSF1R,CTSS,CXCL10,CXCL12,CXCL8,CXCR2,CXCR3,CYP19A1,DHFR,DUSP1,DUSP10,ECH1,EHHADH,EI24,ENTPD2,ESRRA,FA2H,FADS1,FAR1,GAP43,GAPDH,HSD11B1,ICAM1,ID1,IFNG,IGFBP5,IL12A,IL17A,IL18,IL1A,IL1B,IL4,IL4R,IL6,ITGA1,IVL,LILRB4,L…	1529 (13)
Fc gamma receptor		group		0.92	6.19314	6.41e-07	CCL19,CCL22,CCL3,CCNA2,CCND1,CCNE1,CD40,CD86,CDKN1A,CXCL8,HES1,ICAM1,IL10,IL12A,IL12B,IL6,IRF8,NOS1,SOCS3,TNF,TNFAIP3,TNIP3	1132 (13)
cyclopiazonic acid		chemical - endogenous non-mammalian		0.918	1.43533	0.0367	BCL2,BCL2A1,CXCL2,DDIT3,EGR1,FOS,IL6,TNF
MKNK1	1.138	kinase		0.915	3.98297	0.000104	ADAMTSL3,AGRN,AIM2,ANGPTL4,ANXA2,ANXA5,AP3D1,ARVCF,ATP1A3,BAG3,BMP8B,BTN1A1,CD34,CLCF1,CLU,COL4A6,CTH,CYRIA,DNM3,EGR1,EPB41L2,ETS1,F11R,FOS,GAP43,GNAI1,GNAQ,GPC4,HSPA2,ID2,IFI16,IFIT2,ISG15,ITM2A,KCTD12,KIF21B,LAMB2,LAMC1,MAN2A1,MAP1B,MAPK8IP3,MYO5A,MYO6,NRCAM,NRXN1,NUP210,ODAD1,PAX6,PDK1,PDLIM5,PLA2G4A,PLTP,PLXNB2,PTBP1,RGS5,RUFY4,SERPINH1,SFRP1,SPRY2,STXBP1,SYN2,TBC1D30,TFDP1,THRA,TNF,TPP1,USO1…	702 (7)
Shc		group		0.915	1.59176	0.0256	BCL2,BCL2L1,CCND2,CCNE1,FOS,PPARG
SYVN1	1.524	transporter		0.913	7.90658	1.24e-08	ABCC3,ABCC4,ACP2,ADCY9,AHR,AMOTL2,ANO10,APP,ASF1B,AXL,CALM1 (includes others),CAVIN1,CCND1,CD44,CDA,CDK11B,CRTAP,CSPG4,CYB561,CYP1B1,DAG1,DUSP1,EPHA2,ERCC6,ERN1,GPRC5A,HERC5,HLA-A,HLA-C,HNRNPM,IFI44,IFITM2,IGLL1/IGLL5,IL18,IL1B,IL7R,IRAK2,ITGA3,ITGA6,ITGB1,L1CAM,LAPTM4A,LGALS3BP,MCAM,MYOF,NFKB2,OLR1,PLD2,PNPLA2,PTBP1,PTPRJ,PVR,RAB34,RNF31,RPN2,SCARA3,SLC20A1,SLC27A3,SLC2A3,SLC3A2,SLC43A2,SLC4A7,S…	943 (7)
[truncated: 2,402 more rows]

## Sheet: Pathways SibT21vD21 metabolites
Categories	Diseases or Functions Annotation	p-value	Predicted Activation State	Activation z-score	Molecules	# Molecules
[truncated: 500 more rows]

## Sheet: Upstream CAvsCtrl D21 RNA
Upstream Regulator	Expr Fold Change	Molecule Type	Predicted Activation State	Activation z-score	p-value of overlap	Target Molecules in Dataset	Mechanistic Network
[truncated: 2,432 more rows]

[truncated: 13 more sheets: Upstream CAvsCtrl SibT21 RNA, SibT21 IFNvsCtrl Upstream, SibT21 IFN+CAvsIFN Upstream, Pathway Comparisons RNA, D21 IFNvsCtrl Upstream, D21 IFN+CAvsIFN Upstream, Splicing SibT21vsD21, Splicing CAvsCtrl, Spicing CAIFNvsIFN, Splicing IFNvsCtrl, Splicing CAIFNvsCtrl, NonSibT21 Upstream CAvsCtrl, SibT21 Upstream CAvsCtrl 24hrs]
