# Supplementary material for: Mediator kinase inhibition suppresses hyperactive interferon signaling in Down syndrome
Source: bioRxiv preprint, doi:10.1101/2023.07.05.547813, version 4 (2024-11-20)
Supplement: Fig5_sourceData1 [file 547813_file11.xlsx]

## Sheet: Data Key
Tab Name	Corresponding Figure	Description
Splicing statistics	Figure 5 & Figure 5_S1	Number of differential splicing events divided into categories under each of the comparisons used in this study, with inclusion criteria of FDR < 0.05 & IncLevelDifference < 0.2 & <= 2 reads in every replicate
T21vsD21 Ctrl	Figure 5A, B, E + Figure 5_S1A	rMATs output for differential exon inclusion for vehicle-treated T21 cells compared to vehicle-treated D21 cells
T21vsD21 IFN	Figure 5E	rMATs output for differential exon inclusion for IFN-treated T21 cells compared to IFN-treated D21 cells
T21vsD21 CA	Figure 5E	rMATs output for differential exon inclusion for CA-treated T21 cells compared to CA-treated D21 cells
T21vsD21 CA+IFN	Figure 5E	rMATs output for differential exon inclusion for CA+IFN-treated T21 cells compared to CA+IFN-treated D21 cells
D21 IFNvsCtrl	Figure 5_S1B	rMATs output for differential exon inclusion for D21 cells treated with IFN compared to vehicle
T21 IFNvsCtrl	Figure 5_S1B, C	rMATs output for differential exon inclusion for T21 cells treated with IFN compared to vehicle
D21 CAvsCtrl	Figure 5C, F + Figure 5_S1D	rMATs output for differential exon inclusion for D21 cells treated with CA compared to vehicle
T21 CAvsCtrl	Figure 5C, G + Figure 5_S1D, E	rMATs output for differential exon inclusion for T21 cells treated with CA compared to vehicle
D21 CAIFNvsIFN	Figure 5D, F + Figure 5_S1E, F	rMATs output for differential exon inclusion for D21 cells treated with IFN+CA compared to IFN
T21 CAIFNvsIFN	Figure 5D, G + Figure 5_S1F	rMATs output for differential exon inclusion for T21 cells treated with IFN+CA compared to IFN
D21 CAIFNvsCtrl	Figure 5_S1H	rMATs output for differential exon inclusion for D21 cells treated with IFN+CA compared to vehicle
T21CAIFNvsCtrl	Figure 5_S1I	rMATs output for differential exon inclusion for T21 cells treated with IFN+CA compared to vehicle

## Sheet: Splicing Statistics
	T21 vs D21						Treatment Effects
	Alternative cassette exons						Alternative cassette exons
	Control	IFN	CA	IFN+CA			IFN vs Ctrl		CA vs Ctrl		IFN+CA vs IFN		IFN+CA vs Ctrl
Included	382	325	347	381			D21	T21	D21	T21	D21	T21	D21	T21
Skipped	359	334	387	358		Included	163	218	239	256	178	213	209	243
						Skipped	133	200	193	188	130	148	175	196
	Retained introns
	Control	IFN	CA	IFN+CA			Retained introns
Retained	31	28	32	22			IFN vs Ctrl		CA vs Ctrl		IFN+CA vs IFN		IFN+CA vs Ctrl
Spliced	17	14	14	28			D21	T21	D21	T21	D21	T21	D21	T21
						Retained	11	10	13	19	14	7	13	14
	Alt 5' splice sites					Spliced	11	9	10	10	6	17	6	12
	Control	IFN	CA	IFN+CA
Downstream	34	32	20	32			Alt 5' splice sites
Upstream	21	25	10	21			IFN vs Ctrl		CA vs Ctrl		IFN+CA vs IFN		IFN+CA vs Ctrl
							D21	T21	D21	T21	D21	T21	D21	T21
	Alt 3' splice sites					Downstream	11	21	21	29	9	19	13	20
	Control	IFN	CA	IFN+CA		Upstream	19	20	23	17	11	14	20	10
Downstream	50	30	30	47
Upstream	43	36	36	40			Alt 3' splice sites
							IFN vs Ctrl		CA vs Ctrl		IFN+CA vs IFN		IFN+CA vs Ctrl
	Mutually exclusive exons						D21	T21	D21	T21	D21	T21	D21	T21
	Control	IFN	CA	IFN+CA		Downstream	15	20	27	20	23	31	18	20
More	58	58	55	56		Upstream	19	27	19	25	17	27	20	28
Less	84	63	74	68
							Mutually exclusive exons
							IFN vs Ctrl		CA vs Ctrl		IFN+CA vs IFN		IFN+CA vs Ctrl
							D21	T21	D21	T21	D21	T21	D21	T21
						More	13	36	13	39	15	19	20	36
						Less	13	34	23	27	28	18	22	23

## Sheet: T21vsD21 Ctrl
ID...1	GeneID	geneSymbol	chr	strand	exonStart_0base	exonEnd	upstreamES	upstreamEE	downstreamES	downstreamEE	ID...12	IJC_S1R1	IJC_S1R2	IJC_S1R3	SJC_S1R1	SJC_S1R2	SJC_S1R3	IJC_S2R1	IJC_S2R2	IJC_S2R3	SJC_S2R1	SJC_S2R2	SJC_S2R3	IncFormLen	SkipFormLen	PValue	FDR	IncLevel1	IncLevel2	IncLevelDifference	S1R1counts	S2R1counts	S1R2counts	S2R2counts	S1R3counts	S2R3counts
96	ENSG00000104835	SARS2	chr19	-	38922001	38922078	38921526	38921596	38922237	38922267	96	1	2	2	3	0	0	2	0	0	2	5	5	226	150	0.000108846	0.00636875	0.181,1.0,1.0	0.399,0.0,0.0	0.594	4	4	2	5	2	5
121	ENSG00000136925	TSTD2	chr9	-	97625680	97625997	97611573	97611699	97633242	97633301	121	10	5	5	0	0	0	20	5	11	2	2	2	300	150	0.000473022	0.0195433	1.0,1.0,1.0	0.833,0.556,0.733	0.293	10	22	5	7	5	13
166	ENSG00000015592	STMN4	chr8	-	27239225	27239279	27235884	27236905	27239970	27240162	166	2	4	0	0	0	2	2	0	0	4	3	4	203	150	3.9394e-05	0.00287921	1.0,1.0,0.0	0.27,0.0,0.0	0.577	2	6	4	3	2	4
763	ENSG00000101310	SEC23B	chr20	+	18509615	18509943	18507543	18507669	18510821	18511014	763	14	8	6	17	9	7	2	0	3	12	2	8	300	150	0.0013347	0.0421546	0.292,0.308,0.3	0.077,0.0,0.158	0.222	31	14	17	2	13	11
788	ENSG00000168026	TTC21A	chr3	+	39130247	39130358	39130078	39130151	39130700	39130839	788	13	18	16	0	0	0	3	6	6	3	0	8	260	150	1.39444e-06	0.000194594	1.0,1.0,1.0	0.366,1.0,0.302	0.444	13	6	18	6	16	14
1020	ENSG00000135090	TAOK3	chr12	-	118296941	118297163	118266654	118266759	118359520	118359720	1020	5	10	4	0	0	0	5	2	1	22	0	7	300	150	2.62061e-08	6.28803e-06	1.0,1.0,1.0	0.102,1.0,0.067	0.61	5	27	10	2	4	8
1388	ENSG00000177225	GATD1	chr11	-	770313	770398	767227	767368	771332	771426	1388	10	4	2	0	0	0	3	0	9	8	5	4	234	150	1.86527e-11	8.29483e-09	1.0,1.0,1.0	0.194,0.0,0.591	0.738	10	11	4	5	2	13
1445	ENSG00000115318	LOXL3	chr2	-	74536708	74536928	74536290	74536471	74549368	74549583	1445	328	437	293	73	73	56	279	327	333	152	157	162	300	150	6.55032e-15	4.74931e-12	0.692,0.75,0.723	0.479,0.51,0.507	0.223	401	431	510	484	349	495
1777	ENSG00000271425	NBPF10	chr1	-	146140483	146140556	146139808	146140020	146141603	146141818	1777	9	15	23	0	0	0	7	11	15	27	0	7	222	150	9.55064e-07	0.000140945	1.0,1.0,1.0	0.149,1.0,0.591	0.42	9	34	15	11	23	22
2068	ENSG00000099889	ARVCF	chr22	-	19973118	19973317	19972924	19973036	19973642	19973793	2068	80	18	10	2	1	0	20	18	15	14	2	0	300	150	0.00123857	0.0400131	0.952,0.9,1.0	0.417,0.818,1.0	0.206	82	34	19	20	10	15
2314	ENSG00000149499	EML3	chr11	-	62605854	62605980	62605112	62605180	62606957	62607082	2314	3	4	11	0	1	0	0	2	16	2	2	2	275	150	4.42596e-05	0.0031497	1.0,0.686,1.0	0.0,0.353,0.814	0.506	3	2	5	4	11	18
2883	ENSG00000211897	IGHG3	chr14	-	105770104	105770149	105769656	105769986	105770292	105770337	2883	230	342	275	214	295	234	675	415	448	7427	6187	6789	194	150	0	0	0.454,0.473,0.476	0.066,0.049,0.049	0.413	444	8102	637	6602	509	7237
2888	ENSG00000211897	IGHG3	chr14	-	105770292	105770337	105770104	105770149	105770480	105770525	2888	246	503	439	17	0	1	327	350	269	729	754	651	194	150	0	0	0.918,1.0,0.997	0.258,0.264,0.242	0.717	263	1056	503	1104	440	920
2889	ENSG00000211897	IGHG3	chr14	-	105770292	105770337	105770104	105770149	105770668	105770719	2889	66	104	72	0	6	7	677	462	453	583	229	310	194	150	0	0	1.0,0.931,0.888	0.473,0.609,0.53	0.402	66	1260	110	691	79	763
3288	ENSG00000197971	MBP	chr18	-	77097250	77097474	77095367	77095550	77105210	77105286	3288	4	12	12	0	0	0	3	6	5	2	3	0	300	150	0.0013467	0.0424665	1.0,1.0,1.0	0.429,0.5,1.0	0.357	4	5	12	9	12	5
3524	ENSG00000040275	SPDL1	chr5	+	169587260	169587372	169583737	169583889	169588372	169588575	3524	18	27	26	8	0	0	13	4	14	6	6	8	261	150	0.000315297	0.0143988	0.564,1.0,1.0	0.555,0.277,0.501	0.41	26	19	27	10	26	22
3658	ENSG00000224078	SNHG14	chr15	+	25056482	25056622	25053827	25053967	25059154	25059294	3658	19	29	25	0	2	0	3	12	11	9	2	6	289	150	1.56822e-07	3.09489e-05	1.0,0.883,1.0	0.147,0.757,0.488	0.497	19	12	31	14	25	17
5032	ENSG00000126858	RHOT1	chr17	+	32211115	32211238	32208106	32208309	32253084	32253374	5032	13	7	20	0	2	0	16	14	6	6	5	1	272	150	0.000112553	0.00651615	1.0,0.659,1.0	0.595,0.607,0.768	0.23	13	22	9	19	20	7
5606	ENSG00000169118	CSNK1G1	chr15	-	64188374	64188485	64181175	64181430	64203081	64203189	5606	32	28	20	0	0	0	7	21	10	6	0	1	260	150	0.000965659	0.0332375	1.0,1.0,1.0	0.402,1.0,0.852	0.249	32	13	28	21	20	11
5827	ENSG00000221923	ZNF880	chr19	+	52379420	52379540	52374298	52374427	52383848	52383969	5827	139	75	68	31	31	14	6	1	7	81	52	63	269	150	0	0	0.714,0.574,0.73	0.04,0.011,0.058	0.636	170	87	106	53	82	70
5896	ENSG00000089091	DZANK1	chr20	-	18452614	18452682	18448983	18449069	18453730	18453827	5896	22	22	24	0	3	0	20	11	9	5	4	4	217	150	3.47726e-05	0.00260033	1.0,0.835,1.0	0.734,0.655,0.609	0.279	22	25	25	15	24	13
6086	ENSG00000157680	DGKI	chr7	-	137463488	137463611	137444076	137444102	137465907	137466035	6086	2	6	5	0	0	0	11	9	4	6	3	0	272	150	3.43431e-06	0.000409568	1.0,1.0,1.0	0.503,0.623,1.0	0.291	2	17	6	12	5	4
6459	ENSG00000106603	COA1	chr7	-	43658711	43659144	43657221	43657269	43729428	43729499	6459	15	12	4	14	15	19	1	1	0	21	16	14	300	150	2.13288e-08	5.23063e-06	0.349,0.286,0.095	0.023,0.03,0.0	0.226	29	22	27	17	23	14
6462	ENSG00000106603	COA1	chr7	-	43665657	43665722	43656032	43656153	43729428	43729505	6462	24	12	35	38	48	31	20	6	0	78	71	60	214	150	2.62007e-06	0.000332686	0.307,0.149,0.442	0.152,0.056,0.0	0.23	62	98	60	77	66	60
6683	ENSG00000141380	SS18	chr18	-	26082362	26082528	26078075	26078160	26084051	26084175	6683	19	35	8	3	5	4	5	4	7	4	6	6	300	150	0.00118217	0.0386929	0.76,0.778,0.5	0.385,0.25,0.368	0.345	22	9	40	10	12	13
7381	ENSG00000125454	SLC25A19	chr17	-	75288501	75288591	75283422	75283593	75289353	75289390	7381	27	24	28	0	0	2	22	18	9	0	5	6	239	150	0.000129432	0.00727972	1.0,1.0,0.898	1.0,0.693,0.485	0.24	27	22	24	23	30	15
7437	ENSG00000174326	SLC16A11	chr17	-	7041995	7042763	7041629	7041908	7042929	7043073	7437	6	8	9	0	1	0	7	10	13	2	6	3	300	150	9.09162e-06	0.000904958	1.0,0.8,1.0	0.636,0.455,0.684	0.342	6	9	9	16	9	16
8447	ENSG00000185122	HSF1	chr8	+	144293461	144293580	144292482	144292619	144308905	144309014	8447	4	4	6	0	0	0	5	9	6	1	2	14	268	150	3.48548e-08	8.1293e-06	1.0,1.0,1.0	0.737,0.716,0.193	0.451	4	6	4	11	6	20
8649	ENSG00000183648	NDUFB1	chr14	-	92118848	92118966	92116121	92116229	92121641	92121724	8649	14	23	11	0	0	0	4	12	16	2	4	4	267	150	7.19609e-08	1.54511e-05	1.0,1.0,1.0	0.529,0.628,0.692	0.384	14	6	23	16	11	20
9540	ENSG00000106133	NSUN5P2	chr7	-	72954358	72954479	72952151	72952295	72954624	72954717	9540	6	9	7	1	1	0	11	9	12	7	11	4	270	150	1.25714e-05	0.00117119	0.769,0.833,1.0	0.466,0.313,0.625	0.399	7	18	10	20	7	16
9703	ENSG00000007129	CEACAM21	chr19	+	41586153	41586195	41585839	41585871	41586463	41586844	9703	21	29	33	0	0	0	45	29	57	66	53	90	191	150	0	0	1.0,1.0,1.0	0.349,0.301,0.332	0.673	21	111	29	82	33	147
9877	ENSG00000154258	ABCA9	chr17	-	68984884	68984979	68984055	68984175	68985052	68985128	9877	20	11	4	25	11	1	2	2	1	9	13	4	244	150	0.000502271	0.0204708	0.33,0.381,0.711	0.12,0.086,0.133	0.361	45	11	22	15	5	5
9962	ENSG00000256053	APOPT1	chr14	+	103574106	103574170	103562961	103563124	103587273	103587364	9962	369	295	253	111	72	116	268	212	248	225	191	184	213	150	2.27094e-10	8.54223e-08	0.701,0.743,0.606	0.456,0.439,0.487	0.223	480	493	367	403	369	432
10116	ENSG00000079263	SP140	chr2	+	230253315	230253417	230248884	230248968	230269531	230269618	10116	18	26	8	0	4	0	0	0	6	2	7	0	251	150	0.000141049	0.00778001	1.0,0.795,1.0	0.0,0.0,1.0	0.598	18	2	30	7	8	6
11035	ENSG00000198039	ZNF273	chr7	+	64917029	64917118	64903287	64903419	64917580	64917707	11035	78	106	77	8	23	12	105	62	36	25	34	27	238	150	0.000548475	0.0218418	0.86,0.744,0.802	0.726,0.535,0.457	0.229	86	130	129	96	89	63
11208	ENSG00000114670	NEK11	chr3	+	131168829	131168937	131165276	131165519	131170772	131170887	11208	7	7	4	0	0	0	10	0	2	0	3	3	257	150	1.81686e-05	0.00156111	1.0,1.0,1.0	1.0,0.0,0.28	0.573	7	10	7	3	4	5
11718	ENSG00000104490	NCALD	chr8	-	101779923	101779979	101719385	101719648	101887140	101887227	11718	11	5	5	0	0	0	9	22	32	120	138	109	205	150	0	0	1.0,1.0,1.0	0.052,0.104,0.177	0.889	11	129	5	160	5	141
12071	ENSG00000127990	SGCE	chr7	-	94644605	94644667	94639340	94639448	94655989	94656009	12071	6	8	4	1	0	0	12	12	14	4	13	3	211	150	6.9041e-06	0.000729465	0.81,1.0,1.0	0.681,0.396,0.768	0.322	7	16	8	25	4	17
12201	ENSG00000076242	MLH1	chr3	+	37017505	37017599	37012010	37012099	37025636	37026007	12201	4	5	6	0	0	1	8	5	8	1	4	1	243	150	0.000816081	0.0292564	1.0,1.0,0.787	0.832,0.436,0.832	0.229	4	9	5	9	7	9
12945	ENSG00000231721	LINC-PINT	chr7	-	130967388	130967517	130959868	130959970	130984052	130984109	12945	8	8	2	0	1	0	10	5	6	5	0	8	278	150	4.58089e-05	0.00323237	1.0,0.812,1.0	0.519,1.0,0.288	0.335	8	15	9	5	2	14
12992	ENSG00000188266	HYKK	chr15	+	78518587	78518773	78514967	78515107	78527379	78528801	12992	21	32	18	20	18	13	5	20	20	40	28	32	300	150	0.000207687	0.0105378	0.344,0.471,0.409	0.059,0.263,0.238	0.221	41	45	50	48	31	52
13578	ENSG00000245958	AC093752.1	chr4	+	119543752	119543845	119512812	119512970	119550378	119550443	13578	7	9	5	0	0	0	2	3	5	5	0	3	242	150	5.17372e-06	0.000577109	1.0,1.0,1.0	0.199,1.0,0.508	0.431	7	7	9	3	5	8
13674	ENSG00000261611	AC010547.4	chr16	-	71456071	71456121	71447599	71449885	71456763	71456828	13674	3	7	7	0	4	8	1	1	0	1	6	10	199	150	1.56402e-05	0.0013898	1.0,0.569,0.397	0.43,0.112,0.0	0.475	3	2	11	7	15	10
14508	ENSG00000197013	ZNF429	chr19	+	21505984	21506080	21505603	21505774	21507519	21507664	14508	5	15	9	0	0	0	7	5	2	0	2	5	245	150	7.07842e-05	0.00455756	1.0,1.0,1.0	1.0,0.605,0.197	0.399	5	7	15	7	9	7
14678	ENSG00000239213	NCK1-DT	chr3	-	136858517	136858603	136846527	136846586	136861614	136862054	14678	15	24	19	4	1	2	12	7	7	7	3	8	235	150	0.000365985	0.0160466	0.705,0.939,0.858	0.522,0.598,0.358	0.341	19	19	25	10	21	15
15337	ENSG00000185480	PARPBP	chr12	+	102150263	102150371	102148229	102148463	102151569	102151823	15337	4	7	1	0	0	2	2	0	4	3	3	3	257	150	0.000320738	0.0145998	1.0,1.0,0.226	0.28,0.0,0.438	0.503	4	5	7	3	3	7
15358	ENSG00000185480	PARPBP	chr12	+	102175482	102175666	102165728	102165883	102182548	102182627	15358	80	108	102	18	31	24	82	134	97	67	68	64	300	150	3.91705e-07	6.7746e-05	0.69,0.635,0.68	0.38,0.496,0.431	0.233	98	149	139	202	126	161
15539	ENSG00000140471	LINS1	chr15	-	100586223	100586332	100580443	100580945	100602120	100602184	15539	21	14	5	18	12	23	8	2	5	31	31	31	258	150	0.000219702	0.0109889	0.404,0.404,0.112	0.13,0.036,0.086	0.223	39	39	26	33	28	36
15577	ENSG00000205560	CPT1B	chr22	-	50573807	50573921	50573519	50573715	50574334	50574419	15577	255	381	306	97	87	79	106	84	90	116	104	104	263	150	0	0	0.6,0.714,0.688	0.343,0.315,0.33	0.338	352	222	468	188	385	194
15613	ENSG00000196295	GARS-DT	chr7	-	30552099	30552179	30550320	30550781	30563730	30563998	15613	10	10	6	1	2	2	5	4	7	2	14	8	229	150	0.000647396	0.0246486	0.868,0.766,0.663	0.621,0.158,0.364	0.385	11	7	12	18	8	15
15722	ENSG00000139187	KLRG1	chr12	+	8995118	8995288	8950043	8950236	9008974	9009075	15722	4	3	6	0	0	0	0	2	15	4	2	2	300	150	1.86355e-08	4.63833e-06	1.0,1.0,1.0	0.0,0.333,0.789	0.626	4	4	3	4	6	17
17271	ENSG00000213185	FAM24B	chr10	-	122850423	122850520	122849095	122849439	122855644	122855786	17271	48	24	46	5	2	1	43	59	38	28	18	35	246	150	9.15283e-09	2.44215e-06	0.854,0.88,0.966	0.484,0.667,0.398	0.384	53	71	26	77	47	73
17272	ENSG00000213185	FAM24B	chr10	-	122850423	122850550	122849077	122849439	122855644	122855786	17272	58	50	55	5	2	1	53	70	51	28	18	35	276	150	2.37144e-10	8.85371e-08	0.863,0.931,0.968	0.507,0.679,0.442	0.378	63	81	52	88	56	86
17838	ENSG00000203705	TATDN3	chr1	+	212812226	212812328	212807735	212807848	212815046	212815597	17838	15	13	19	0	0	0	11	10	12	5	0	4	251	150	3.37641e-06	0.000404591	1.0,1.0,1.0	0.568,1.0,0.642	0.263	15	16	13	10	19	16
18419	ENSG00000125841	NRSN2	chr20	+	355325	355349	349637	349832	359258	359405	18419	2	2	2	0	0	0	0	4	2	3	3	2	173	150	1.1675e-08	3.0421e-06	1.0,1.0,1.0	0.0,0.536,0.464	0.667	2	3	2	7	2	4
19325	ENSG00000156787	TBC1D31	chr8	+	123142261	123142456	123140760	123140901	123144716	123144855	19325	116	119	129	16	71	45	139	107	92	119	71	103	300	150	0.000672136	0.0253398	0.784,0.456,0.589	0.369,0.43,0.309	0.24	132	258	190	178	174	195
20693	ENSG00000250155	AC008957.1	chr5	-	36705679	36705851	36668564	36668711	36725113	36725195	20693	161	170	135	32	26	31	33	22	19	20	18	28	300	150	2.07016e-09	6.31506e-07	0.716,0.766,0.685	0.452,0.379,0.253	0.361	193	53	196	40	166	47
20696	ENSG00000250155	AC008957.1	chr5	-	36705720	36705851	36668564	36668711	36725113	36725176	20696	146	149	126	32	26	31	32	23	21	20	18	28	280	150	1.26256e-08	3.26428e-06	0.71,0.754,0.685	0.462,0.406,0.287	0.331	178	52	175	41	157	49
20697	ENSG00000250155	AC008957.1	chr5	-	36705720	36705851	36702477	36702964	36725113	36725176	20697	177	174	161	6	3	4	33	23	24	5	10	3	280	150	1.57215e-06	0.000215781	0.94,0.969,0.956	0.78,0.552,0.811	0.241	183	38	177	33	165	27
22113	ENSG00000270629	NBPF14	chr1	-	148579073	148579237	148577982	148578034	148583140	148583192	22113	38	48	10	8	6	2	14	19	25	10	19	30	300	150	1.66087e-08	4.15455e-06	0.704,0.8,0.714	0.412,0.333,0.294	0.393	46	24	54	38	12	55
23152	ENSG00000153113	CAST	chr5	+	96740744	96740783	96740037	96740118	96741265	96741317	23152	812	943	742	0	0	0	495	377	412	332	313	272	188	150	0	0	1.0,1.0,1.0	0.543,0.49,0.547	0.473	812	827	943	690	742	684
23458	ENSG00000185485	SDHAP1	chr3	-	195986518	195986604	195985445	195985789	195990189	195990258	23458	162	193	162	0	0	0	83	111	117	27	37	31	235	150	0	0	1.0,1.0,1.0	0.662,0.657,0.707	0.325	162	110	193	148	162	148
24376	ENSG00000246985	SOCS2-AS1	chr12	-	93565612	93565744	93545070	93545358	93566743	93566970	24376	17	13	8	1	1	1	3	0	5	1	2	3	281	150	0.0010117	0.0344078	0.901,0.874,0.81	0.616,0.0,0.471	0.499	18	4	14	2	9	8
25534	ENSG00000166352	C11orf74	chr11	+	36633283	36633438	36610080	36610239	36648015	36648155	25534	16	12	24	2	0	0	12	9	15	5	0	7	300	150	0.000159597	0.00858077	0.8,1.0,1.0	0.545,1.0,0.517	0.246	18	17	12	9	24	22
25806	ENSG00000124334	IL9R	chrX	+	156001407	156001508	155997705	155997787	156004419	156004565	25806	37	29	23	15	0	0	183	166	122	75	51	55	250	150	0.00169147	0.0499981	0.597,1.0,1.0	0.594,0.661,0.571	0.257	52	258	29	217	23	177
26126	ENSG00000230533	AL356234.2	chr6	+	137666628	137666788	137665645	137665739	137672019	137672098	26126	9	7	6	2	4	1	3	0	0	3	3	12	300	150	9.35185e-07	0.000138625	0.692,0.467,0.75	0.333,0.0,0.0	0.525	11	6	11	3	7	12
26260	ENSG00000087586	AURKA	chr20	-	56388686	56388784	56388155	56388202	56392153	56392215	26260	57	94	92	0	0	0	138	153	141	85	1	49	247	150	5.5546e-10	1.92978e-07	1.0,1.0,1.0	0.496,0.989,0.636	0.293	57	223	94	154	92	190
26264	ENSG00000087586	AURKA	chr20	-	56390555	56390665	56388155	56388202	56392153	56392215	26264	125	148	126	0	0	0	170	176	243	85	1	49	259	150	4.98019e-11	2.06765e-08	1.0,1.0,1.0	0.537,0.99,0.742	0.244	125	255	148	177	126	292
26287	ENSG00000268230	AC012313.3	chr19	-	58359196	58359323	58358488	58358585	58362676	58362751	26287	5	6	5	0	2	0	0	2	4	4	4	4	276	150	9.32913e-07	0.000138493	1.0,0.62,1.0	0.0,0.214,0.352	0.685	5	4	8	6	5	8
26535	ENSG00000198001	IRAK4	chr12	+	43760924	43760972	43759035	43759200	43768102	43768272	26535	25	23	21	5	11	9	11	2	9	8	13	12	197	150	0.00122995	0.0398268	0.792,0.614,0.64	0.511,0.105,0.363	0.356	30	19	34	15	30	21
26909	ENSG00000136104	RNASEH2B	chr13	+	50912994	50913131	50910142	50910438	50927406	50927478	26909	9	2	4	8	3	7	5	1	3	22	24	39	286	150	5.5664e-05	0.00376322	0.371,0.259,0.231	0.107,0.021,0.039	0.231	17	27	5	25	11	42
27170	ENSG00000081154	PCNP	chr3	+	101579588	101580004	101574185	101574279	101592626	101592771	27170	20	15	27	0	0	0	17	17	9	4	0	3	300	150	0.000115393	0.00665466	1.0,1.0,1.0	0.68,1.0,0.6	0.24	20	21	15	17	27	12
28012	ENSG00000239827	SUGT1P3	chr13	-	40921473	40921531	40913915	40914105	40921618	40921656	28012	14	14	15	0	0	0	19	9	20	0	4	6	207	150	1.11602e-05	0.00107132	1.0,1.0,1.0	1.0,0.62,0.707	0.224	14	19	14	13	15	26
28251	ENSG00000105223	PLD3	chr19	+	40365552	40365585	40348583	40348724	40366418	40366510	28251	37	37	29	9	12	8	26	11	27	25	12	22	182	150	1.52097e-05	0.0013661	0.772,0.718,0.749	0.462,0.43,0.503	0.281	46	51	49	23	37	49
28517	ENSG00000196141	SPATS2L	chr2	+	200383866	200384017	200372108	200372251	200389222	200389283	28517	4	4	10	0	1	0	4	8	4	1	5	1	300	150	4.87021e-05	0.00340499	1.0,0.667,1.0	0.667,0.444,0.667	0.296	4	5	5	13	10	5
28545	ENSG00000067445	TRO	chrX	+	54930740	54931031	54928602	54928710	54931203	54931429	28545	19	14	15	0	0	0	6	10	12	6	2	2	300	150	4.99895e-08	1.11647e-05	1.0,1.0,1.0	0.333,0.714,0.75	0.401	19	12	14	12	15	14
29032	ENSG00000107099	DOCK8	chr9	+	276993	277086	271626	271729	280790	280905	29032	2	8	4	0	0	0	3	5	9	2	4	0	242	150	0.00028307	0.0132972	1.0,1.0,1.0	0.482,0.437,1.0	0.36	2	5	8	9	4	9
29204	ENSG00000070831	CDC42	chr1	+	22074093	22074219	22052626	22052868	22078428	22078583	29204	298	348	297	0	0	0	262	237	279	103	100	111	275	150	0	0	1.0,1.0,1.0	0.581,0.564,0.578	0.426	298	365	348	337	297	390
29496	ENSG00000091073	DTX2	chr7	+	76463544	76463709	76461700	76461836	76477113	76477178	29496	7	7	8	0	0	0	25	30	29	3	24	30	300	150	1.15079e-08	3.01425e-06	1.0,1.0,1.0	0.806,0.385,0.326	0.494	7	28	7	54	8	59
29560	ENSG00000283886	BX664615.2	chr9	-	39830012	39830110	39818820	39818924	39863832	39863942	29560	12	4	7	0	2	1	0	0	0	3	2	3	247	150	4.5064e-13	2.65233e-10	1.0,0.548,0.81	0.0,0.0,0.0	0.786	12	3	6	2	8	3
29821	ENSG00000124602	UNC5CL	chr6	-	41032883	41033146	41032035	41032137	41033880	41034181	29821	12	8	5	0	0	0	14	3	6	4	1	2	300	150	5.69253e-06	0.000620455	1.0,1.0,1.0	0.636,0.6,0.6	0.388	12	18	8	4	5	8
30146	ENSG00000126456	IRF3	chr19	-	49664442	49664673	49663187	49663258	49665630	49665705	30146	45	58	57	4	0	4	58	41	45	8	10	12	300	150	0.000112353	0.00651615	0.849,1.0,0.877	0.784,0.672,0.652	0.206	49	66	58	51	61	57
30154	ENSG00000126456	IRF3	chr19	-	49664586	49664673	49663420	49663514	49665671	49665859	30154	27	22	27	0	0	0	22	8	16	2	9	0	236	150	8.12592e-05	0.00506576	1.0,1.0,1.0	0.875,0.361,1.0	0.255	27	24	22	17	27	16
30627	ENSG00000112812	PRSS16	chr6	+	27251749	27252040	27251041	27251119	27252807	27252949	30627	8	9	3	0	0	0	3	0	2	2	2	5	300	150	1.36824e-12	7.56364e-10	1.0,1.0,1.0	0.429,0.0,0.167	0.801	8	5	9	2	3	7
30632	ENSG00000112812	PRSS16	chr6	+	27252807	27252949	27251193	27251264	27254985	27255131	30632	21	9	8	2	1	0	4	4	4	4	2	5	291	150	7.00019e-06	0.000737283	0.844,0.823,1.0	0.34,0.508,0.292	0.509	23	8	10	6	8	9
30636	ENSG00000112812	PRSS16	chr6	+	27254692	27254872	27251193	27251264	27254985	27255119	30636	33	16	29	2	1	0	4	4	15	4	2	5	300	150	3.36628e-06	0.000403861	0.892,0.889,1.0	0.333,0.5,0.6	0.449	35	8	17	6	29	20
30924	ENSG00000119408	NEK6	chr9	+	124292848	124293013	124261472	124261583	124301935	124302054	30924	294	336	313	0	20	13	405	394	346	86	51	69	300	150	1.11022e-16	9.10538e-14	1.0,0.894,0.923	0.702,0.794,0.715	0.202	294	491	356	445	326	415
31347	ENSG00000156171	DRAM2	chr1	-	111139500	111139666	111137522	111137586	111140037	111140090	31347	577	628	542	4	1	0	282	271	288	111	92	126	300	150	0	0	0.986,0.997,1.0	0.56,0.596,0.533	0.431	581	393	629	363	542	414
31349	ENSG00000156171	DRAM2	chr1	-	111139587	111139711	111137522	111137586	111140037	111140062	31349	134	113	108	4	1	0	120	62	141	111	92	126	273	150	0	0	0.948,0.984,1.0	0.373,0.27,0.381	0.636	138	231	114	154	108	267
32064	ENSG00000141076	UTP4	chr16	+	69155870	69155993	69153583	69153680	69160355	69160462	32064	6	5	5	2	1	0	2	1	4	6	6	4	272	150	2.59469e-05	0.00206209	0.623,0.734,1.0	0.155,0.084,0.355	0.588	8	8	6	7	5	8
32443	ENSG00000083807	SLC27A5	chr19	-	58483531	58483646	58479511	58480805	58499122	58499263	32443	8	7	7	0	0	1	0	8	4	2	5	0	264	150	0.000431732	0.0182116	1.0,1.0,0.799	0.0,0.476,1.0	0.441	8	2	7	13	8	4
32818	ENSG00000164654	MIOS	chr7	+	7567606	7567688	7566871	7567072	7568025	7568123	32818	250	220	216	14	17	13	87	35	67	43	42	35	231	150	0	0	0.921,0.894,0.915	0.568,0.351,0.554	0.419	264	130	237	77	229	102
32819	ENSG00000164654	MIOS	chr7	+	7567606	7567688	7566871	7567072	7572435	7572667	32819	128	123	114	103	117	123	31	30	40	119	171	123	231	150	0	0	0.447,0.406,0.376	0.145,0.102,0.174	0.269	231	150	240	201	237	163
32821	ENSG00000164654	MIOS	chr7	+	7567606	7567688	7567052	7567484	7568025	7568123	32821	137	133	134	5	2	2	74	14	38	13	13	0	231	150	0.000302929	0.0139614	0.947,0.977,0.978	0.787,0.412,1.0	0.234	142	87	135	27	136	38
32822	ENSG00000164654	MIOS	chr7	+	7567606	7567688	7567052	7567484	7572435	7572667	32822	35	53	52	1	21	21	21	7	16	10	27	27	231	150	0.000442761	0.0185906	0.958,0.621,0.617	0.577,0.144,0.278	0.399	36	31	74	34	73	43
33170	ENSG00000205078	SYCE1L	chr16	+	77209096	77209144	77208464	77208539	77209416	77209471	33170	5	10	5	0	2	0	2	5	8	4	4	0	197	150	0.00104429	0.0352168	1.0,0.792,1.0	0.276,0.488,1.0	0.343	5	6	12	9	5	8
33300	ENSG00000112584	FAM120B	chr6	+	170358225	170358318	170330448	170330550	170391012	170391121	33300	26	11	13	0	0	0	14	12	20	4	11	5	242	150	1.62339e-09	5.0934e-07	1.0,1.0,1.0	0.684,0.403,0.713	0.4	26	18	11	23	13	25
33979	ENSG00000197889	MEIG1	chr10	+	14966439	14966606	14959438	14959557	14972512	14972851	33979	17	14	7	0	1	0	11	9	0	2	0	4	300	150	0.000794629	0.0286903	1.0,0.875,1.0	0.733,1.0,0.0	0.381	17	13	15	9	7	4
34801	ENSG00000250151	ARPC4-TTLL3	chr3	+	9820545	9820741	9812942	9813111	9826996	9827240	34801	13	20	17	0	2	0	10	15	14	4	4	0	300	150	0.000752905	0.0274539	1.0,0.833,1.0	0.556,0.652,1.0	0.208	13	14	22	19	17	14
35244	ENSG00000078177	N4BP2	chr4	+	40097226	40097569	40056825	40057030	40102074	40103218	35244	13	29	20	0	0	0	4	5	21	2	2	2	300	150	0.000223376	0.011114	1.0,1.0,1.0	0.5,0.556,0.84	0.368	13	6	29	7	20	23
35750	ENSG00000100591	AHSA1	chr14	+	77465538	77465667	77462641	77462759	77469076	77469247	35750	27	29	24	0	0	3	17	14	30	10	2	2	278	150	0.000478239	0.0196654	1.0,1.0,0.812	0.478,0.791,0.89	0.218	27	27	29	16	27	32
36556	ENSG00000237298	TTN-AS1	chr2	+	178613211	178613311	178600557	178600667	178614034	178614173	36556	2	5	5	0	2	0	0	3	2	6	2	1	249	150	3.3167e-05	0.00250544	1.0,0.601,1.0	0.0,0.475,0.546	0.527	2	6	7	5	5	3
36752	ENSG00000187912	CLEC17A	chr19	+	14592280	14592358	14587613	14587691	14594516	14594549	36752	340	320	1529	60	54	46	228	195	266	36	145	176	227	150	3.73166e-06	0.000439269	0.789,0.797,0.956	0.807,0.471,0.5	0.255	400	264	374	340	1575	442
36858	ENSG00000167065	DUSP18	chr22	-	30663012	30663260	30652050	30652297	30663403	30663506	36858	10	11	9	3	0	5	0	0	0	4	6	6	300	150	1.09537e-11	5.12146e-09	0.625,1.0,0.474	0.0,0.0,0.0	0.7	13	4	11	6	14	6
37099	ENSG00000137959	IFI44L	chr1	+	78627905	78628393	78620402	78620571	78628950	78628999	37099	2101	2998	2670	18	31	33	92	133	74	298	237	177	300	150	0	0	0.983,0.98,0.976	0.134,0.219,0.173	0.804	2119	390	3029	370	2703	251
37100	ENSG00000137959	IFI44L	chr1	+	78627905	78628393	78620877	78620971	78628950	78628999	37100	1303	1886	1691	3	0	0	54	85	44	17	10	2	300	150	0	0	0.995,1.0,1.0	0.614,0.81,0.917	0.218	1306	71	1886	95	1691	46
37367	ENSG00000007384	RHBDF1	chr16	-	61584	61696	61384	61459	61797	62052	37367	17	2	14	11	8	12	2	0	2	8	5	10	261	150	0.000317468	0.0144649	0.47,0.126,0.401	0.126,0.0,0.103	0.256	28	10	10	5	26	12
37440	ENSG00000081665	ZNF506	chr19	-	19792410	19792484	19786561	19786854	19806030	19806126	37440	24	27	13	3	2	0	18	5	21	13	8	2	223	150	0.0007684	0.027907	0.843,0.901,1.0	0.482,0.296,0.876	0.363	27	31	29	13	13	23
37642	ENSG00000102575	ACP5	chr19	-	11578023	11578194	11577592	11577679	11578479	11578657	37642	44	21	29	12	11	5	0	5	2	3	5	9	300	150	2.04521e-05	0.0017118	0.647,0.488,0.744	0.0,0.333,0.1	0.482	56	3	32	10	34	11
37800	ENSG00000270149	AL591806.3	chr1	-	161022749	161022827	161021387	161021487	161038879	161038944	37800	8	10	6	0	11	12	1	0	0	4	3	8	227	150	1.77635e-06	0.00023986	1.0,0.375,0.248	0.142,0.0,0.0	0.494	8	5	21	3	18	8
38339	ENSG00000100147	CCDC134	chr22	+	41809878	41810000	41800678	41800766	41813263	41813445	38339	4	12	13	1	2	3	3	0	4	4	4	9	271	150	5.25942e-06	0.000584713	0.689,0.769,0.706	0.293,0.0,0.197	0.558	5	7	14	4	16	13
38754	ENSG00000285012	AC092723.3	chr16	-	85987983	85988086	85986763	85987057	85995209	85995899	38754	11	31	22	26	35	25	0	0	0	22	23	26	252	150	6.66134e-16	5.33211e-13	0.201,0.345,0.344	0.0,0.0,0.0	0.297	37	22	66	23	47	26
38965	ENSG00000111817	DSE	chr6	+	116367008	116367217	116258445	116258967	116399197	116399937	38965	2	6	1	8	4	2	1	0	1	8	3	13	300	150	0.000313741	0.0143342	0.111,0.429,0.2	0.059,0.0,0.037	0.215	10	9	10	3	3	14
39254	ENSG00000233184	AC093157.1	chr1	+	101077362	101077508	101025877	101026061	101083460	101083574	39254	29	44	42	7	3	17	31	29	12	12	26	23	295	150	0.00158487	0.0478218	0.678,0.882,0.557	0.568,0.362,0.21	0.326	36	43	47	55	59	35
39411	ENSG00000134283	PPHLN1	chr12	+	42374862	42375074	42335882	42335974	42441314	42441429	39411	13	4	20	1	0	0	3	4	9	5	2	0	300	150	0.000129966	0.00729336	0.867,1.0,1.0	0.231,0.5,1.0	0.379	14	8	4	6	20	9
39439	ENSG00000123411	IKZF4	chr12	+	56023670	56023764	56019317	56019415	56025053	56025158	39439	9	7	7	3	3	6	0	3	4	14	5	9	243	150	0.000100008	0.00595977	0.649,0.59,0.419	0.0,0.27,0.215	0.391	12	14	10	8	13	13
40021	ENSG00000151422	FER	chr5	+	108768092	108768238	108747821	108748000	108798123	108798389	40021	30	32	32	4	0	0	52	39	26	17	2	20	295	150	0.00017464	0.00920652	0.792,1.0,1.0	0.609,0.908,0.398	0.292	34	69	32	41	32	46
40096	ENSG00000131508	UBE2D2	chr5	+	139614696	139614774	139600371	139600435	139623367	139623444	40096	6	2	2	6	0	5	2	0	0	16	7	2	227	150	0.000136995	0.00759828	0.398,1.0,0.209	0.076,0.0,0.0	0.51	12	18	2	7	7	2
40104	ENSG00000243335	KCTD7	chr7	+	66639127	66639228	66638855	66638929	66643534	66643611	40104	0	5	2	4	3	1	0	0	2	4	11	6	250	150	0.00150338	0.0461281	0.0,0.5,0.545	0.0,0.0,0.167	0.293	4	4	8	11	3	8
40544	ENSG00000230795	HLA-K	chr6	+	29928063	29928328	29927177	29927452	29928456	29928573	40544	30	38	49	0	0	0	10	23	10	3	6	9	300	150	6.72751e-12	3.34893e-09	1.0,1.0,1.0	0.625,0.657,0.357	0.454	30	13	38	29	49	19
40576	ENSG00000256646	AC010132.3	chr7	-	42917513	42917690	42911914	42912552	42921857	42921931	40576	12	4	1	5	2	1	0	4	0	4	2	7	300	150	0.000941822	0.0325738	0.545,0.5,0.333	0.0,0.5,0.0	0.293	17	4	6	6	2	7
40999	ENSG00000135451	TROAP	chr12	+	49330144	49330573	49329394	49329454	49331213	49331407	40999	3	16	5	0	0	0	6	13	7	9	0	3	300	150	3.546e-06	0.000420382	1.0,1.0,1.0	0.25,1.0,0.538	0.404	3	15	16	13	5	10
41100	ENSG00000100526	CDKN3	chr14	+	54411483	54411706	54401523	54401579	54417847	54417951	41100	3	2	10	0	0	0	8	13	11	2	2	2	300	150	0.000215578	0.0108284	1.0,1.0,1.0	0.667,0.765,0.733	0.278	3	10	2	15	10	13
41754	ENSG00000141971	MVB12A	chr19	+	17413220	17413305	17406144	17406296	17423692	17423799	41754	11	10	14	0	0	2	9	4	9	2	3	1	234	150	0.000337321	0.0151419	1.0,1.0,0.818	0.743,0.461,0.852	0.254	11	11	10	7	16	10
41838	ENSG00000150637	CD226	chr18	-	69947360	69947532	69895700	69896045	69956613	69956670	41838	18	11	11	0	0	0	5	23	16	4	4	0	300	150	4.46108e-05	0.00316301	1.0,1.0,1.0	0.385,0.742,1.0	0.291	18	9	11	27	11	16
41892	ENSG00000177565	TBL1XR1	chr3	-	177110808	177110887	177098486	177098541	177201738	177201817	41892	8	10	6	0	1	0	6	6	5	4	0	2	228	150	0.000717828	0.0265293	1.0,0.868,1.0	0.497,1.0,0.622	0.25	8	10	11	6	6	7
41893	ENSG00000177565	TBL1XR1	chr3	-	177131362	177131449	177064919	177065022	177197120	177197163	41893	19	30	23	17	30	29	7	15	18	46	54	60	236	150	6.25654e-08	1.35846e-05	0.415,0.389,0.335	0.088,0.15,0.16	0.247	36	53	60	69	52	78
42102	ENSG00000228794	LINC01128	chr1	+	841199	841373	827668	827775	851926	851998	42102	0	13	3	2	0	0	0	2	0	4	1	2	300	150	6.25762e-05	0.00413279	0.0,1.0,1.0	0.0,0.5,0.0	0.5	2	4	13	3	3	2
42909	ENSG00000124831	LRRFIP1	chr2	+	237727875	237727935	237708543	237708630	237739231	237739309	42909	5	15	4	0	0	0	6	4	13	4	0	8	209	150	8.25354e-07	0.000124559	1.0,1.0,1.0	0.518,1.0,0.538	0.315	5	10	15	4	4	21
43575	ENSG00000128604	IRF5	chr7	+	128941278	128941424	128938216	128938245	128942070	128942276	43575	26	47	30	9	14	8	24	22	39	36	46	52	295	150	1.53335e-11	7.00559e-09	0.595,0.631,0.656	0.253,0.196,0.276	0.386	35	60	61	68	38	91
44037	ENSG00000166037	CEP57	chr11	+	95822498	95822576	95818826	95818904	95829186	95829331	44037	2	2	4	4	2	0	2	0	0	1	3	4	227	150	0.00159997	0.0480744	0.248,0.398,1.0	0.569,0.0,0.0	0.359	6	3	4	3	4	4
44180	ENSG00000284713	SMIM38	chr11	+	69157173	69159351	69155909	69156114	69159445	69159752	44180	263	224	194	3	2	8	96	68	54	42	40	3	300	150	1.14085e-09	3.68226e-07	0.978,0.982,0.924	0.533,0.459,0.9	0.331	266	138	226	108	202	57
44308	ENSG00000135390	ATP5MC2	chr12	-	53669870	53670114	53665238	53665428	53672575	53672645	44308	19	14	11	0	0	0	32	8	31	4	4	0	300	150	0.00012479	0.00708634	1.0,1.0,1.0	0.8,0.5,1.0	0.233	19	36	14	12	11	31
44333	ENSG00000175779	C15orf53	chr15	+	38676393	38676454	38671854	38671940	38688893	38689314	44333	5	11	7	12	9	5	1	2	1	11	8	2	210	150	0.00111243	0.0370157	0.229,0.466,0.5	0.061,0.152,0.263	0.24	17	12	20	10	12	3
44490	ENSG00000136869	TLR4	chr9	+	117708198	117708318	117704191	117704565	117708562	117708729	44490	5	11	6	2	0	2	2	0	0	0	4	2	269	150	0.00038016	0.0165309	0.582,1.0,0.626	1.0,0.0,0.0	0.403	7	2	11	4	8	2
44873	ENSG00000158483	FAM86C1	chr11	+	71791735	71791819	71789782	71789845	71793379	71793481	44873	28	37	37	4	6	4	24	8	15	10	6	15	233	150	2.69968e-05	0.00212527	0.818,0.799,0.856	0.607,0.462,0.392	0.337	32	34	43	14	41	30
45554	ENSG00000135749	PCNX2	chr1	-	233262044	233262165	233261284	233261321	233262957	233263163	45554	84	71	55	3	10	2	28	23	35	5	9	9	270	150	0.000515878	0.0209316	0.94,0.798,0.939	0.757,0.587,0.684	0.216	87	33	81	32	57	44
45605	ENSG00000136895	GARNL3	chr9	+	127348923	127349035	127345402	127345477	127353845	127353944	45605	20	13	14	6	6	4	1	0	2	4	2	4	261	150	6.44572e-06	0.000688163	0.657,0.555,0.668	0.126,0.0,0.223	0.51	26	5	19	2	18	6
47354	ENSG00000140876	NUDT7	chr16	+	77736649	77736743	77725430	77725584	77741581	77741969	47354	16	15	13	15	23	31	7	1	0	22	16	33	243	150	4.64469e-06	0.000529913	0.397,0.287,0.206	0.164,0.037,0.0	0.23	31	29	38	17	44	33
47483	ENSG00000215837	SDHAP2	chr3	+	195661755	195661841	195658095	195658165	195662570	195662733	47483	57	82	66	0	0	0	23	34	37	8	7	17	235	150	1.11022e-16	9.10538e-14	1.0,1.0,1.0	0.647,0.756,0.581	0.339	57	31	82	41	66	54
47484	ENSG00000215837	SDHAP2	chr3	+	195663623	195663767	195662570	195662733	195664085	195664250	47484	106	123	65	15	23	10	81	67	86	34	28	33	293	150	9.34844e-06	0.0009252	0.783,0.732,0.769	0.549,0.551,0.572	0.204	121	115	146	95	75	119
47615	ENSG00000136098	NEK3	chr13	-	52141019	52141069	52136799	52136902	52143915	52143987	47615	9	13	12	0	0	0	17	10	10	11	13	19	199	150	2.05835e-13	1.2872e-10	1.0,1.0,1.0	0.538,0.367,0.284	0.604	9	28	13	23	12	29
48400	ENSG00000161249	DMKN	chr19	-	35506125	35506185	35505938	35505986	35508204	35508240	48400	15	22	9	2	6	4	7	12	27	33	21	35	209	150	4.07432e-07	6.99253e-05	0.843,0.725,0.618	0.132,0.291,0.356	0.469	17	40	28	33	13	62
48530	ENSG00000156273	BACH1	chr21	+	29270356	29270456	29194146	29194260	29287983	29288095	48530	15	12	8	0	0	2	2	2	0	2	0	2	249	150	0.00154486	0.0469118	1.0,1.0,0.707	0.376,1.0,0.0	0.444	15	4	12	2	10	2
48894	ENSG00000125089	SH3TC1	chr4	+	8204782	8205053	8201650	8201714	8205166	8205366	48894	14	10	12	1	0	0	3	9	7	2	2	2	300	150	9.80106e-05	0.00587225	0.875,1.0,1.0	0.429,0.692,0.636	0.373	15	5	10	11	12	9
49837	ENSG00000243716	NPIPB5	chr16	+	22507336	22507399	22491706	22491826	22513521	22513610	49837	3	3	2	0	0	0	0	12	4	13	11	0	212	150	4.29837e-07	7.31432e-05	1.0,1.0,1.0	0.0,0.436,1.0	0.521	3	13	3	23	2	4
50098	ENSG00000135976	ANKRD36	chr2	+	97179860	97179933	97179737	97179766	97181597	97181626	50098	25	34	12	0	0	0	10	9	17	2	2	2	222	150	0.000979229	0.0335659	1.0,1.0,1.0	0.772,0.753,0.852	0.208	25	12	34	11	12	19
50138	ENSG00000142046	TMEM91	chr19	+	41383560	41383632	41382771	41382921	41383862	41384077	50138	10	11	11	16	0	16	0	2	2	14	6	8	221	150	0.000197035	0.0101257	0.298,1.0,0.318	0.0,0.185,0.145	0.429	26	14	11	8	27	10
50660	ENSG00000181038	METTL23	chr17	+	76726969	76727213	76726842	76726879	76733292	76733381	50660	21	20	25	0	0	0	6	11	26	0	6	2	300	150	6.65573e-05	0.00435263	1.0,1.0,1.0	1.0,0.478,0.867	0.218	21	6	20	17	25	28
50662	ENSG00000181038	METTL23	chr17	+	76729689	76729794	76726829	76726879	76733292	76733377	50662	10	6	24	0	0	0	4	8	27	0	6	2	254	150	0.000141309	0.00779004	1.0,1.0,1.0	1.0,0.441,0.889	0.223	10	4	6	14	24	29
50954	ENSG00000144535	DIS3L2	chr2	+	232014847	232014979	231961707	231961765	232024276	232024330	50954	3	4	7	0	0	2	6	4	0	2	3	4	281	150	9.81944e-05	0.00587622	1.0,1.0,0.651	0.616,0.416,0.0	0.54	3	8	4	7	9	4
51175	ENSG00000072864	NDE1	chr16	+	15699728	15699854	15694164	15694256	15724190	15724222	51175	88	62	49	15	0	68	53	21	50	59	48	63	275	150	0.000562852	0.0222598	0.762,1.0,0.282	0.329,0.193,0.302	0.407	103	112	62	69	117	113
51260	ENSG00000142185	TRPM2	chr21	+	44427009	44427111	44426659	44426736	44435130	44435217	51260	180	172	199	12	29	19	141	139	183	146	145	169	251	150	0	0	0.9,0.78,0.862	0.366,0.364,0.393	0.473	192	287	201	284	218	352
51675	ENSG00000124191	TOX2	chr20	+	43955147	43955272	43916166	43916208	43973366	43973432	51675	5	2	5	2	0	0	2	0	5	16	27	18	274	150	2.21113e-09	6.68397e-07	0.578,1.0,1.0	0.064,0.0,0.132	0.794	7	18	2	27	5	23
51879	ENSG00000158806	NPM2	chr8	+	22036357	22036526	22034509	22034544	22036637	22036896	51879	14	15	16	4	0	0	7	7	14	10	9	13	300	150	2.9934e-07	5.40634e-05	0.636,1.0,1.0	0.259,0.28,0.35	0.582	18	17	15	16	16	27
52842	ENSG00000171130	ATP6V0E2	chr7	+	149879165	149879225	149878677	149878746	149879334	149880696	52842	0	2	7	2	17	4	0	0	0	2	13	4	209	150	0.000415451	0.0176663	0.0,0.078,0.557	0.0,0.0,0.0	0.212	2	2	19	13	11	4
52874	ENSG00000116133	DHCR24	chr1	-	54879059	54879319	54875941	54876047	54879748	54879805	52874	2	5	6	11	9	2	0	0	0	4	6	11	300	150	4.83222e-06	0.000546325	0.083,0.217,0.6	0.0,0.0,0.0	0.3	13	4	14	6	8	11
53712	ENSG00000025708	TYMP	chr22	-	50529495	50529754	50527164	50527283	50529903	50529999	53712	23	29	9	15	31	14	11	0	0	10	13	17	300	150	0.000541987	0.0216485	0.434,0.319,0.243	0.355,0.0,0.0	0.214	38	21	60	13	23	17
54477	ENSG00000085382	HACE1	chr6	-	104833041	104833173	104796928	104797025	104849141	104849246	54477	11	13	11	0	0	0	12	2	8	3	0	3	281	150	0.000281111	0.0132114	1.0,1.0,1.0	0.681,1.0,0.587	0.244	11	15	13	2	11	11
54481	ENSG00000085382	HACE1	chr6	-	104843222	104843298	104796928	104797025	104849141	104849246	54481	14	15	17	0	0	0	9	13	12	3	0	3	225	150	0.00165095	0.0491342	1.0,1.0,1.0	0.667,1.0,0.727	0.202	14	12	15	13	17	15
54584	ENSG00000178950	GAK	chr4	-	859361	859493	850935	851084	859605	859722	54584	26	22	10	29	20	14	1	4	2	32	33	24	281	150	1.47582e-12	8.11352e-10	0.324,0.37,0.276	0.016,0.061,0.043	0.283	55	33	42	37	24	26
55877	ENSG00000159445	THEM4	chr1	-	151889982	151890214	151889213	151889373	151895007	151895194	55877	81	126	102	41	59	67	61	56	70	84	67	107	300	150	4.85646e-09	1.40035e-06	0.497,0.516,0.432	0.266,0.295,0.246	0.213	122	145	185	123	169	177
56021	ENSG00000165240	ATP7A	chrX	+	77922998	77923042	77910738	77910835	77962622	77962814	56021	38	35	23	45	40	46	3	11	1	26	24	20	193	150	0.000119515	0.00684117	0.396,0.405,0.28	0.082,0.263,0.037	0.233	83	29	75	35	69	21
56022	ENSG00000165240	ATP7A	chrX	+	77922998	77923042	77910738	77910835	77971620	77971761	56022	48	41	30	60	80	82	11	6	2	47	42	62	193	150	1.66274e-07	3.25576e-05	0.383,0.285,0.221	0.154,0.1,0.024	0.204	108	58	121	48	112	64
56023	ENSG00000165240	ATP7A	chrX	+	77922998	77923052	77910739	77910835	77962622	77962814	56023	27	23	10	45	40	46	1	3	0	26	24	20	203	150	1.01174e-07	2.09588e-05	0.307,0.298,0.138	0.028,0.085,0.0	0.21	72	27	63	27	56	20
56512	ENSG00000136717	BIN1	chr2	-	127051153	127051243	127050801	127050912	127057472	127057601	56512	311	235	284	19	18	14	46	20	29	8	9	8	239	150	1.51782e-05	0.00136573	0.911,0.891,0.927	0.783,0.582,0.695	0.223	330	54	253	29	298	37
56806	ENSG00000166167	BTRC	chr10	+	101430344	101430452	101354032	101354228	101479367	101479457	56806	46	53	37	0	0	0	35	25	38	6	8	2	257	150	3.28991e-08	7.74537e-06	1.0,1.0,1.0	0.773,0.646,0.917	0.221	46	41	53	33	37	40
56921	ENSG00000205583	STAG3L1	chr7	+	75361971	75362088	75361373	75361459	75365254	75365353	56921	34	237	28	0	1	0	81	33	41	1	3	28	266	150	7.52192e-07	0.000114904	1.0,0.993,1.0	0.979,0.861,0.452	0.234	34	82	238	36	28	69
56922	ENSG00000205583	STAG3L1	chr7	+	75364632	75364756	75361373	75361459	75365254	75365353	56922	5	5	5	0	1	0	7	11	13	1	3	28	273	150	1.45162e-05	0.00131829	1.0,0.733,1.0	0.794,0.668,0.203	0.356	5	8	6	14	5	41
56925	ENSG00000205583	STAG3L1	chr7	+	75365951	75366059	75365563	75365643	75366323	75366438	56925	16	15	50	6	0	3	4	1	9	25	13	47	257	150	1.11022e-16	9.10538e-14	0.609,1.0,0.907	0.085,0.043,0.101	0.762	22	29	15	14	53	56
57032	ENSG00000188997	KCTD21	chr11	-	78186680	78186816	78174058	78174583	78188523	78188588	57032	11	9	11	0	2	0	2	3	3	0	1	5	285	150	0.00165081	0.0491342	1.0,0.703,1.0	1.0,0.612,0.24	0.284	11	2	11	4	11	8
57272	ENSG00000102879	CORO1A	chr16	+	30186597	30186720	30183421	30183725	30187038	30187167	57272	6	11	5	0	0	0	8	15	5	15	8	0	272	150	3.39106e-07	5.98411e-05	1.0,1.0,1.0	0.227,0.508,1.0	0.422	6	23	11	23	5	5
57339	ENSG00000154760	SLFN13	chr17	-	35446839	35446932	35446716	35446753	35447267	35447414	57339	2	11	11	4	4	3	4	6	9	23	22	19	242	150	0.000845723	0.0299648	0.237,0.63,0.694	0.097,0.145,0.227	0.364	6	27	15	28	14	28
57492	ENSG00000133424	LARGE1	chr22	-	33856739	33856802	33761370	33761558	33919994	33920421	57492	69	66	61	22	60	26	151	119	123	134	171	150	212	150	0.00131636	0.0417967	0.689,0.438,0.624	0.444,0.33,0.367	0.203	91	285	126	290	87	273
58238	ENSG00000232677	LINC00665	chr19	-	36322129	36322225	36321992	36322030	36330252	36330492	58238	24	16	17	0	0	4	8	7	15	4	1	7	245	150	0.00126762	0.0405998	1.0,1.0,0.722	0.55,0.811,0.567	0.265	24	12	16	8	21	22
58239	ENSG00000232677	LINC00665	chr19	-	36322129	36322384	36321992	36322030	36330252	36330492	58239	19	13	10	0	0	4	3	7	6	4	1	7	300	150	0.00152347	0.0464526	1.0,1.0,0.556	0.273,0.778,0.3	0.402	19	7	13	8	14	13
58317	ENSG00000166012	TAF1D	chr11	-	93733349	93733397	93730676	93730712	93736140	93736239	58317	2	5	4	0	3	1	0	0	2	4	2	0	197	150	0.00139435	0.0435573	1.0,0.559,0.753	0.0,0.0,1.0	0.437	2	4	8	2	5	2
58453	ENSG00000266053	NDUFV2-AS1	chr18	-	9132222	9132409	9121276	9121456	9133390	9133422	58453	9	14	2	5	2	0	1	1	1	2	3	2	300	150	0.000352698	0.0155737	0.474,0.778,1.0	0.2,0.143,0.2	0.57	14	3	16	4	2	3
58817	ENSG00000138071	ACTR2	chr2	+	65261246	65261392	65239851	65239962	65268563	65268755	58817	10	7	12	0	0	0	26	7	8	1	2	4	295	150	5.20331e-05	0.00356594	1.0,1.0,1.0	0.93,0.64,0.504	0.309	10	27	7	9	12	12
59186	ENSG00000232912	RERE-AS1	chr1	+	8428481	8428588	8424644	8424701	8429826	8429972	59186	6	0	2	0	2	0	0	0	2	2	2	2	256	150	9.80714e-05	0.00587237	1.0,0.0,1.0	0.0,0.0,0.369	0.544	6	2	2	2	2	4
59354	ENSG00000105383	CD33	chr19	+	51225217	51225598	51225097	51225155	51225802	51226081	59354	10	15	6	2	0	0	52	68	43	30	35	25	300	150	1.07333e-06	0.000155869	0.714,1.0,1.0	0.464,0.493,0.462	0.432	12	82	15	103	6	68
60282	ENSG00000150433	TMEM218	chr11	-	125110643	125110746	125110490	125110549	125111584	125111611	60282	21	3	16	0	0	0	6	12	18	4	0	4	252	150	2.84819e-05	0.00221259	1.0,1.0,1.0	0.472,1.0,0.728	0.267	21	10	3	12	16	22
60635	ENSG00000122481	RWDD3	chr1	+	95244210	95244715	95234210	95234315	95246755	95247223	60635	75	54	77	2	22	6	76	56	29	21	27	33	300	150	0.0011115	0.0370094	0.949,0.551,0.865	0.644,0.509,0.305	0.302	77	97	76	83	83	62
60750	ENSG00000149187	CELF1	chr11	-	47500860	47500932	47499452	47499604	47552991	47553117	60750	80	116	105	0	3	17	82	84	68	34	7	34	221	150	4.23571e-05	0.00304682	1.0,0.963,0.807	0.621,0.891,0.576	0.227	80	116	119	91	122	102
60753	ENSG00000149187	CELF1	chr11	-	47506857	47506897	47499452	47499604	47552991	47553117	60753	24	31	12	0	3	17	13	10	16	34	7	34	189	150	0.00044951	0.018803	1.0,0.891,0.359	0.233,0.531,0.272	0.405	24	47	34	17	29	50
60782	ENSG00000213468	FIRRE	chrX	-	131743095	131743248	131711650	131711720	131749305	131749458	60782	19	5	4	3	1	1	3	2	0	2	3	7	300	150	2.2981e-05	0.00188014	0.76,0.714,0.667	0.429,0.25,0.0	0.487	22	5	6	5	5	7
61049	ENSG00000010626	LRRC23	chr12	+	6909889	6910026	6906408	6906662	6913890	6914228	61049	12	7	7	0	0	0	1	3	18	3	3	0	286	150	5.37569e-05	0.003664	1.0,1.0,1.0	0.149,0.344,1.0	0.502	12	4	7	6	7	18
61221	ENSG00000138111	MFSD13A	chr10	+	102465981	102466087	102461394	102461450	102468954	102469197	61221	27	26	24	0	1	0	22	40	37	19	9	18	255	150	2.87733e-11	1.24094e-08	1.0,0.939,1.0	0.405,0.723,0.547	0.421	27	41	27	49	24	55
61223	ENSG00000138111	MFSD13A	chr10	+	102468286	102468332	102465980	102466087	102468954	102469197	61223	4	6	16	5	7	11	4	4	0	16	17	14	195	150	2.19981e-05	0.00181456	0.381,0.397,0.528	0.161,0.153,0.0	0.331	9	20	13	21	27	14
61311	ENSG00000170632	ARMC10	chr7	+	103092476	103092653	103086868	103086937	103098298	103098683	61311	13	5	11	0	0	0	11	1	15	2	4	3	300	150	2.60495e-07	4.76497e-05	1.0,1.0,1.0	0.733,0.111,0.714	0.481	13	13	5	5	11	18
61653	ENSG00000237940	LINC01238	chr2	+	241972112	241972169	241971684	241971775	241972451	241972556	61653	6	5	13	0	0	0	7	9	7	2	0	5	206	150	0.000122173	0.00696142	1.0,1.0,1.0	0.718,1.0,0.505	0.259	6	9	5	9	13	12
61757	ENSG00000180776	ZDHHC20	chr13	-	21413651	21413772	21391721	21391854	21459053	21459248	61757	10	13	9	0	0	0	14	8	9	3	3	0	270	150	0.000790858	0.0285981	1.0,1.0,1.0	0.722,0.597,1.0	0.227	10	17	13	11	9	9
62427	ENSG00000198947	DMD	chrX	-	31177931	31177970	31147274	31147518	31178668	31178805	62427	28	25	17	2	9	0	0	0	3	2	2	2	188	150	4.90563e-05	0.00342205	0.918,0.689,1.0	0.0,0.0,0.545	0.687	30	2	34	2	17	5
62507	ENSG00000080503	SMARCA2	chr9	+	2161000	2161035	2159813	2159909	2161685	2161843	62507	17	36	19	20	42	35	8	7	4	31	27	26	184	150	3.63669e-05	0.00269338	0.409,0.411,0.307	0.174,0.174,0.111	0.223	37	39	78	34	54	30
62929	ENSG00000088832	FKBP1A	chr20	-	1377429	1377511	1375490	1375603	1378069	1378174	62929	29	23	23	2	0	1	5	7	8	5	3	4	231	150	6.59752e-07	0.000102504	0.904,1.0,0.937	0.394,0.602,0.565	0.427	31	10	23	10	24	12
62931	ENSG00000088832	FKBP1A	chr20	-	1377429	1377511	1375490	1375603	1392961	1392998	62931	27	23	21	13	20	22	7	7	8	12	18	25	231	150	0.000327553	0.0148149	0.574,0.428,0.383	0.275,0.202,0.172	0.245	40	19	43	25	43	33
63100	ENSG00000076662	ICAM3	chr19	-	10339017	10339245	10338681	10338863	10339538	10339624	63100	28	23	53	10	9	14	11	6	8	6	12	9	300	150	0.001526	0.0464942	0.583,0.561,0.654	0.478,0.2,0.308	0.271	38	17	32	18	67	17
63101	ENSG00000076662	ICAM3	chr19	-	10339061	10339245	10338681	10338863	10339538	10339641	63101	25	23	51	10	9	14	11	4	6	6	12	9	300	150	0.000969828	0.0333265	0.556,0.561,0.646	0.478,0.143,0.25	0.297	35	17	32	16	65	15
63873	ENSG00000174652	ZNF266	chr19	-	9418761	9418895	9418504	9418631	9419050	9419299	63873	121	138	125	30	16	18	48	32	37	24	24	9	283	150	0.000799956	0.0288333	0.681,0.821,0.786	0.515,0.414,0.685	0.225	151	72	154	56	143	46
63876	ENSG00000174652	ZNF266	chr19	-	9418765	9418895	9418504	9418631	9419216	9419299	63876	66	89	80	29	13	12	36	23	38	61	60	56	279	150	8.18234e-14	5.42186e-11	0.55,0.786,0.782	0.241,0.171,0.267	0.48	95	97	102	83	92	94
63880	ENSG00000174652	ZNF266	chr19	-	9433667	9433786	9420064	9420218	9435107	9435193	63880	95	89	84	8	9	17	69	27	44	31	32	35	268	150	1.56232e-09	4.93127e-07	0.869,0.847,0.734	0.555,0.321,0.413	0.387	103	100	98	59	101	79
63883	ENSG00000174652	ZNF266	chr19	-	9434074	9434235	9420064	9420218	9435107	9435193	63883	14	17	14	8	9	17	14	5	11	31	32	35	300	150	1.75656e-05	0.00152566	0.467,0.486,0.292	0.184,0.072,0.136	0.284	22	45	26	37	31	46
63885	ENSG00000174652	ZNF266	chr19	-	9434797	9434859	9420064	9420218	9435107	9435193	63885	64	78	57	8	9	17	42	45	59	31	32	35	211	150	6.35276e-08	1.37e-05	0.85,0.86,0.704	0.491,0.5,0.545	0.293	72	73	87	77	74	94
64160	ENSG00000114331	ACAP2	chr3	-	195410706	195411009	195392089	195392147	195442149	195442276	64160	12	16	8	5	22	1	6	2	4	12	16	14	300	150	0.000619293	0.0238234	0.545,0.267,0.8	0.2,0.059,0.125	0.409	17	18	38	18	9	18
64419	ENSG00000103852	TTC23	chr15	-	99245388	99245510	99228532	99228732	99249416	99249518	64419	4	11	12	0	16	7	1	1	0	4	2	2	271	150	0.000109836	0.00640434	1.0,0.276,0.487	0.122,0.217,0.0	0.475	4	5	27	3	19	2
64585	ENSG00000239779	WBP1	chr2	+	74459437	74459745	74458638	74458671	74460220	74460310	64585	9	13	11	0	0	0	5	4	2	1	2	3	300	150	4.27493e-06	0.000493923	1.0,1.0,1.0	0.714,0.5,0.25	0.512	9	6	13	6	11	5
64594	ENSG00000239779	WBP1	chr2	+	74459651	74459745	74458468	74458671	74460220	74460856	64594	3	10	6	0	0	0	2	3	0	1	2	3	243	150	2.71292e-07	4.93539e-05	1.0,1.0,1.0	0.552,0.481,0.0	0.656	3	3	10	5	6	3
65707	ENSG00000179406	LINC00174	chr7	-	66390103	66390250	66382236	66382427	66395878	66395919	65707	14	11	9	0	0	1	13	8	9	8	0	6	296	150	1.70181e-05	0.00148975	1.0,1.0,0.82	0.452,1.0,0.432	0.312	14	21	11	8	10	15
66033	ENSG00000205531	NAP1L4	chr11	-	2990908	2990992	2979206	2979237	2992228	2992259	66033	3	4	4	0	0	0	0	2	2	3	0	3	233	150	7.04482e-06	0.000739647	1.0,1.0,1.0	0.0,1.0,0.3	0.567	3	3	4	2	4	5
66521	ENSG00000165949	IFI27	chr14	+	94111624	94111773	94110748	94110797	94114850	94114880	66521	67	86	89	16	11	16	23	16	16	15	12	9	298	150	6.56904e-06	0.000699233	0.678,0.797,0.737	0.436,0.402,0.472	0.301	83	38	97	28	105	25
66523	ENSG00000165949	IFI27	chr14	+	94111658	94111773	94110677	94110797	94114850	94114880	66523	58	70	77	16	11	16	23	25	11	15	12	9	264	150	0.000309211	0.0141661	0.673,0.783,0.732	0.466,0.542,0.41	0.257	74	38	81	37	93	20
66828	ENSG00000244486	SCARF2	chr22	-	20431017	20431537	20430689	20430908	20431744	20431846	66828	6	2	2	3	2	0	1	0	0	1	3	2	300	150	3.28089e-05	0.00248552	0.5,0.333,1.0	0.333,0.0,0.0	0.5	9	2	4	3	2	2
67134	ENSG00000138629	UBL7	chr15	-	74451435	74451520	74445976	74446227	74456551	74456671	67134	2	4	4	0	1	3	4	0	0	9	20	18	234	150	3.05725e-06	0.000373904	1.0,0.719,0.461	0.222,0.0,0.0	0.653	2	13	5	20	7	18
67977	ENSG00000115760	BIRC6	chr2	+	32590805	32590978	32575155	32575366	32597750	32597968	67977	20	23	10	2	0	0	16	25	20	10	0	6	300	150	0.000234829	0.0115178	0.833,1.0,1.0	0.444,1.0,0.625	0.255	22	26	23	25	10	26
68026	ENSG00000138795	LEF1	chr4	-	108063622	108063657	108048596	108048751	108064335	108064384	68026	4	2	6	0	0	1	28	14	12	1	4	10	184	150	0.000236512	0.0115933	1.0,1.0,0.83	0.958,0.74,0.495	0.212	4	29	2	18	7	22
68360	ENSG00000157800	SLC37A3	chr7	-	140345215	140345263	140337283	140337349	140345868	140345907	68360	32	25	11	0	2	0	17	13	5	5	1	4	197	150	6.09735e-05	0.00404904	1.0,0.905,1.0	0.721,0.908,0.488	0.263	32	22	27	14	11	9
69765	ENSG00000171456	ASXL1	chr20	+	32360709	32360806	32358965	32359851	32366383	32366466	69765	15	44	11	0	0	0	67	75	49	12	11	45	246	150	2.29434e-09	6.9146e-07	1.0,1.0,1.0	0.773,0.806,0.399	0.341	15	79	44	86	11	94
69771	ENSG00000171456	ASXL1	chr20	+	32360793	32360806	32358965	32359851	32366383	32366466	69771	4	9	5	0	0	0	8	16	5	12	11	45	162	150	1.67176e-11	7.60325e-09	1.0,1.0,1.0	0.382,0.574,0.093	0.65	4	20	9	27	5	50
69775	ENSG00000171456	ASXL1	chr20	+	32360793	32360806	32360347	32360586	32366383	32366466	69775	3	8	2	1	0	0	6	16	7	8	4	9	162	150	5.67869e-06	0.000620297	0.735,1.0,1.0	0.41,0.787,0.419	0.373	4	14	8	20	2	16
69840	ENSG00000119943	PYROXD2	chr10	-	98390597	98390754	98387200	98387307	98391009	98391082	69840	38	52	41	3	5	3	140	141	138	32	46	33	300	150	4.13253e-05	0.00299846	0.864,0.839,0.872	0.686,0.605,0.676	0.203	41	172	57	187	44	171
69948	ENSG00000172775	FAM192A	chr16	-	57174168	57174286	57173727	57173869	57181553	57181790	69948	93	16	77	0	0	0	49	39	75	19	6	8	267	150	6.96343e-12	3.41539e-09	1.0,1.0,1.0	0.592,0.785,0.84	0.261	93	68	16	45	77	83
69953	ENSG00000172775	FAM192A	chr16	-	57174619	57174688	57173727	57173869	57175538	57175700	69953	49	27	27	23	33	12	19	28	23	58	39	36	218	150	0.000715582	0.0264789	0.594,0.36,0.608	0.184,0.331,0.305	0.247	72	77	60	67	39	59
69985	ENSG00000172775	FAM192A	chr16	-	57178501	57178852	57175538	57175590	57185820	57186039	69985	22	47	36	0	0	0	22	3	32	1	4	3	300	150	5.13519e-05	0.0035265	1.0,1.0,1.0	0.917,0.273,0.842	0.323	22	23	47	7	36	35
70250	ENSG00000127054	INTS11	chr1	-	1323180	1323287	1315519	1315618	1324580	1324625	70250	0	5	3	5	1	0	0	0	2	2	2	12	256	150	0.000818556	0.0293031	0.0,0.746,1.0	0.0,0.0,0.089	0.552	5	2	6	2	3	14
71020	ENSG00000078304	PPP2R5C	chr14	+	101818991	101819085	101809904	101810036	101831700	101831804	71020	9	17	23	11	8	27	7	7	2	16	13	22	243	150	0.00151745	0.0463441	0.336,0.567,0.345	0.213,0.249,0.053	0.244	20	23	25	20	50	24
71031	ENSG00000078304	PPP2R5C	chr14	+	101831700	101831804	101823877	101823941	101836168	101836432	71031	6	11	3	1	3	0	1	8	17	4	10	11	253	150	0.00163531	0.0488284	0.781,0.685,1.0	0.129,0.322,0.478	0.512	7	5	14	18	3	28
71476	ENSG00000188234	AGAP4	chr10	-	45848842	45848912	45847859	45847954	45853654	45853875	71476	14	26	21	2	4	1	0	2	1	12	8	24	219	150	0	0	0.827,0.817,0.935	0.0,0.146,0.028	0.802	16	12	30	10	22	25
72046	ENSG00000226025	LGALS17A	chr19	+	39683486	39683763	39681997	39682208	39685301	39685418	72046	16	21	17	15	12	4	0	0	0	6	6	4	300	150	9.79875e-11	3.93748e-08	0.348,0.467,0.68	0.0,0.0,0.0	0.498	31	6	33	6	21	4
72267	ENSG00000197150	ABCB8	chr7	+	151032843	151033061	151028449	151028610	151034272	151034428	72267	2	3	7	0	12	4	2	0	0	2	7	4	300	150	0.0013035	0.0414705	1.0,0.111,0.467	0.333,0.0,0.0	0.415	2	4	15	7	11	4
72417	ENSG00000104529	EEF1D	chr8	-	143592714	143592893	143586728	143586852	143593874	143594071	72417	7	5	0	4	2	2	0	2	0	2	2	2	300	150	0.00157437	0.0475623	0.467,0.556,0.0	0.0,0.333,0.0	0.23	11	2	7	4	2	2
72420	ENSG00000104529	EEF1D	chr8	-	143592714	143592942	143586728	143586852	143593874	143594071	72420	5	4	0	4	2	2	0	0	0	2	2	2	300	150	1.89539e-05	0.00161953	0.385,0.5,0.0	0.0,0.0,0.0	0.295	9	2	6	2	2	2
72654	ENSG00000128739	SNRPN	chr15	+	24974287	24974456	24962113	24962209	24976304	24976416	72654	26	25	25	0	2	0	11	12	8	0	4	4	300	150	0.000231083	0.0114124	1.0,0.862,1.0	1.0,0.6,0.5	0.254	26	11	27	16	25	12
72668	ENSG00000128739	SNRPN	chr15	+	24974397	24974456	24962113	24962209	24976304	24976416	72668	8	11	11	0	2	0	4	2	2	0	4	4	208	150	0.000206449	0.010507	1.0,0.799,1.0	1.0,0.265,0.265	0.423	8	4	13	6	11	6
73357	ENSG00000242086	MUC20-OT1	chr3	+	195696360	195696589	195689336	195689438	195699029	195699116	73357	32	19	19	1	1	2	26	23	11	18	13	14	300	150	8.27722e-10	2.75414e-07	0.941,0.905,0.826	0.419,0.469,0.282	0.501	33	44	20	36	21	25
73432	ENSG00000168734	PKIG	chr20	+	44582584	44582731	44531784	44531978	44589796	44589866	73432	133	152	164	45	55	67	162	119	130	114	120	139	296	150	1.86535e-09	5.74282e-07	0.6,0.583,0.554	0.419,0.334,0.322	0.221	178	276	207	239	231	269
73795	ENSG00000106868	SUSD1	chr9	-	112042100	112042165	112041866	112041960	112058427	112058686	73795	30	23	32	22	2	15	9	5	3	16	13	7	214	150	0.000102619	0.00607918	0.489,0.89,0.599	0.283,0.212,0.231	0.417	52	25	25	18	47	10
74801	ENSG00000113648	H2AFY	chr5	-	135360496	135360780	135345967	135346057	135369405	135369603	74801	14	9	7	0	0	0	19	10	12	3	0	5	300	150	1.78681e-05	0.00154295	1.0,1.0,1.0	0.76,1.0,0.545	0.232	14	22	9	10	7	17
75035	ENSG00000260075	NSFP1	chr17	+	46456706	46456906	46425526	46425682	46475199	46475365	75035	6	3	4	0	0	0	8	7	4	5	0	1	300	150	0.000568764	0.0224139	1.0,1.0,1.0	0.444,1.0,0.667	0.296	6	13	3	7	4	5
75599	ENSG00000127022	CANX	chr5	+	179708238	179708380	179698905	179699102	179709872	179709949	75599	11	8	9	0	2	0	15	4	6	2	4	2	291	150	0.000563911	0.0222854	1.0,0.673,1.0	0.794,0.34,0.607	0.311	11	17	10	8	9	8
75952	ENSG00000177192	PUS1	chr12	+	131932721	131932833	131932174	131932312	131943538	131945896	75952	44	39	47	2	2	4	36	36	45	6	10	15	261	150	6.6527e-05	0.00435263	0.927,0.918,0.871	0.775,0.674,0.633	0.211	46	42	41	46	51	60
76847	ENSG00000052749	RRP12	chr10	-	97425673	97425739	97424798	97424893	97426022	97426046	76847	4	1	2	0	1	0	2	2	3	2	1	6	215	150	2.04854e-05	0.00171237	1.0,0.411,1.0	0.411,0.583,0.259	0.386	4	4	2	3	2	9
76958	ENSG00000112576	CCND3	chr6	-	41940951	41941161	41940493	41940585	42048500	42048688	76958	5	6	5	10	2	6	0	3	1	20	15	20	300	150	6.7038e-06	0.000710553	0.2,0.6,0.294	0.0,0.091,0.024	0.326	15	20	8	18	11	21
77288	ENSG00000119979	FAM45A	chr10	+	119105310	119105495	119104763	119105006	119107947	119108096	77288	3	2	2	0	1	0	10	13	7	3	6	6	300	150	8.63248e-05	0.0052915	1.0,0.5,1.0	0.625,0.52,0.368	0.329	3	13	3	19	2	13
78107	ENSG00000234127	TRIM26	chr6	-	30201034	30201083	30198665	30199153	30213304	30213427	78107	273	258	227	2	84	0	234	231	272	117	121	158	198	150	2.75335e-14	1.94009e-11	0.99,0.699,1.0	0.602,0.591,0.566	0.31	275	351	342	352	227	430
78314	ENSG00000100258	LMF2	chr22	-	50506637	50506666	50506034	50506213	50507581	50507684	78314	5	1	1	1	1	2	1	1	0	13	4	2	178	150	4.35197e-05	0.0031081	0.808,0.457,0.296	0.061,0.174,0.0	0.442	6	14	2	5	3	2
78605	ENSG00000213057	C1orf220	chr1	+	178545212	178545903	178542795	178542885	178547093	178548889	78605	7	6	9	0	12	15	0	1	1	2	1	6	300	150	0.000436226	0.0183701	1.0,0.2,0.231	0.0,0.333,0.077	0.34	7	2	18	2	24	7
78623	ENSG00000273066	AL355987.4	chr9	+	136809254	136809429	136807739	136808326	136809687	136810042	78623	16	36	12	5	13	22	0	10	18	24	24	34	300	150	0.000338098	0.0151632	0.615,0.581,0.214	0.0,0.172,0.209	0.343	21	24	49	34	34	52
78697	ENSG00000235109	ZSCAN31	chr6	-	28329302	28329714	28327382	28327533	28336081	28336198	78697	19	18	36	0	2	2	25	22	19	25	11	2	300	150	5.39635e-05	0.00367058	1.0,0.818,0.9	0.333,0.5,0.826	0.353	19	50	20	33	38	21
78699	ENSG00000235109	ZSCAN31	chr6	-	28329302	28329778	28327382	28327533	28336081	28336165	78699	25	25	32	0	2	2	29	34	26	25	11	2	300	150	0.000133329	0.00744863	1.0,0.862,0.889	0.367,0.607,0.867	0.303	25	54	27	45	34	28
79005	ENSG00000103415	HMOX2	chr16	+	4483636	4483754	4474702	4474847	4505483	4505610	79005	112	105	136	15	2	2	53	84	102	28	19	12	267	150	1.77074e-05	0.00153265	0.807,0.967,0.974	0.515,0.713,0.827	0.231	127	81	107	103	138	114
80330	ENSG00000114126	TFDP2	chr3	-	142054114	142054149	141995019	141995141	142093060	142093127	80330	6	3	3	0	1	0	4	0	4	5	3	7	184	150	1.18974e-07	2.4344e-05	1.0,0.71,1.0	0.395,0.0,0.318	0.666	6	9	4	3	3	11
80837	ENSG00000175224	ATG13	chr11	+	46625300	46625417	46621059	46621157	46630044	46630100	80837	3	12	11	0	0	2	11	1	6	3	2	1	266	150	0.000268252	0.0127934	1.0,1.0,0.756	0.674,0.22,0.772	0.363	3	14	12	3	13	7
81720	ENSG00000068400	GRIPAP1	chrX	-	48981794	48981872	48981595	48981691	48982978	48983092	81720	995	1100	843	61	20	35	556	521	551	226	205	184	227	150	0	0	0.915,0.973,0.941	0.619,0.627,0.664	0.306	1056	782	1120	726	878	735
81830	ENSG00000221955	SLC12A8	chr3	-	125118768	125118856	125110188	125110335	125135668	125135782	81830	79	50	43	0	5	5	34	24	31	5	14	10	237	150	4.56845e-05	0.00322587	1.0,0.864,0.845	0.811,0.52,0.662	0.239	79	39	55	38	48	41
81898	ENSG00000170322	NFRKB	chr11	-	129893296	129893385	129892714	129892870	129895495	129895557	81898	16	17	18	7	5	16	8	8	10	30	16	19	238	150	3.33646e-05	0.00251762	0.59,0.682,0.415	0.144,0.24,0.249	0.351	23	38	22	24	34	29
82898	ENSG00000253824	AP003472.1	chr8	-	100410734	100410771	100381259	100381771	100414364	100414459	82898	4	5	2	6	13	10	0	0	0	2	3	2	186	150	5.50099e-06	0.000604032	0.35,0.237,0.139	0.0,0.0,0.0	0.242	10	2	18	3	12	2
83508	ENSG00000239445	ST3GAL6-AS1	chr3	-	98715649	98715777	98715304	98715521	98718418	98718521	83508	19	23	17	2	2	0	40	22	56	19	6	11	277	150	0.000210453	0.0106291	0.837,0.862,1.0	0.533,0.665,0.734	0.256	21	59	25	28	17	67
84057	ENSG00000173409	ARV1	chr1	+	230995759	230995984	230990599	230990698	231000137	231000595	84057	7	9	10	0	0	0	11	12	4	2	4	0	300	150	0.000451576	0.0188657	1.0,1.0,1.0	0.733,0.6,1.0	0.222	7	13	9	16	10	4
84063	ENSG00000196689	TRPV1	chr17	-	3577125	3577192	3573632	3573955	3580456	3580527	84063	29	12	7	5	0	1	2	1	7	3	1	8	216	150	2.85224e-05	0.00221366	0.801,1.0,0.829	0.316,0.41,0.378	0.509	34	5	12	2	8	15
84098	ENSG00000175216	CKAP5	chr11	-	46753309	46753497	46751345	46751534	46758922	46759043	84098	9	12	15	0	0	1	35	14	12	5	1	5	300	150	5.68548e-05	0.00383079	1.0,1.0,0.882	0.778,0.875,0.545	0.228	9	40	12	15	16	17
84513	ENSG00000174516	PELI3	chr11	+	66468127	66468280	66466744	66467027	66471241	66471362	84513	12	6	16	0	0	0	23	13	16	2	4	2	300	150	1.01995e-05	0.000993701	1.0,1.0,1.0	0.852,0.619,0.8	0.243	12	25	6	17	16	18
84585	ENSG00000099219	ERMP1	chr9	-	5805610	5805785	5801175	5801328	5810010	5810231	84585	76	75	42	8	21	15	57	47	58	37	39	29	300	150	0.000280993	0.0132114	0.826,0.641,0.583	0.435,0.376,0.5	0.246	84	94	96	86	57	87
84696	ENSG00000104983	CCDC61	chr19	+	45996244	45996401	45995470	45995504	46006558	46006716	84696	5	3	5	0	0	0	0	7	5	2	2	1	300	150	0.000204446	0.0104316	1.0,1.0,1.0	0.0,0.636,0.714	0.55	5	2	3	9	5	6
84780	ENSG00000152380	FAM151B	chr5	+	80501791	80501917	80487968	80488148	80513603	80513661	84780	6	2	6	1	0	0	6	1	4	2	2	3	275	150	2.4499e-06	0.000313064	0.766,1.0,1.0	0.621,0.214,0.421	0.503	7	8	2	3	6	7
84989	ENSG00000271853	AL162258.1	chr1	-	153631010	153631078	153626331	153626533	153632033	153632063	84989	19	15	11	0	1	0	9	13	7	2	2	4	217	150	2.86647e-05	0.00221989	1.0,0.912,1.0	0.757,0.818,0.547	0.263	19	11	16	15	11	11
85115	ENSG00000158711	ELK4	chr1	-	205600650	205600794	205598454	205598649	205616477	205616644	85115	5	7	2	0	4	4	0	2	1	4	6	1	293	150	0.00133571	0.0421591	1.0,0.473,0.204	0.0,0.146,0.339	0.397	5	4	11	8	6	2
85116	ENSG00000158711	ELK4	chr1	-	205600650	205600794	205599824	205599925	205616477	205616644	85116	6	14	2	0	0	0	3	10	6	0	2	4	293	150	0.000260384	0.0124956	1.0,1.0,1.0	1.0,0.719,0.434	0.282	6	3	14	12	2	10
85283	ENSG00000100490	CDKL1	chr14	-	50332261	50332432	50329403	50330181	50334564	50334621	85283	90	110	61	19	18	25	58	38	45	38	37	28	300	150	1.70936e-05	0.00149505	0.703,0.753,0.55	0.433,0.339,0.446	0.263	109	96	128	75	86	73
85515	ENSG00000137767	SQOR	chr15	+	45631926	45632015	45631147	45631230	45658906	45659142	85515	2	6	3	0	0	0	8	12	8	1	2	3	238	150	0.00048459	0.0198797	1.0,1.0,1.0	0.834,0.791,0.627	0.249	2	9	6	14	3	11
85779	ENSG00000167895	TMC8	chr17	+	78131881	78132214	78131280	78131737	78132358	78132465	85779	571	892	811	8	0	0	480	538	612	65	65	93	300	150	0	0	0.973,1.0,1.0	0.787,0.805,0.767	0.205	579	545	892	603	811	705
85845	ENSG00000213753	CENPBD1P1	chr19	+	58591497	58591624	58575444	58575588	58598966	58599801	85845	34	28	32	19	33	19	0	1	5	53	32	36	276	150	0	0	0.493,0.316,0.478	0.0,0.017,0.07	0.4	53	53	61	33	51	41
85846	ENSG00000213753	CENPBD1P1	chr19	+	58591497	58591624	58586154	58586356	58598966	58599801	85846	37	19	23	25	23	18	0	1	4	17	42	27	276	150	1.11022e-16	9.10538e-14	0.446,0.31,0.41	0.0,0.013,0.075	0.359	62	17	42	43	41	31
86385	ENSG00000131374	TBC1D5	chr3	-	17518901	17518995	17508473	17508605	17742480	17742652	86385	15	33	38	6	10	13	10	5	10	23	14	9	243	150	2.41833e-06	0.000309822	0.607,0.671,0.643	0.212,0.181,0.407	0.374	21	33	43	19	51	19
86397	ENSG00000131374	TBC1D5	chr3	-	17562018	17562142	17508473	17508605	17742480	17742498	86397	16	38	28	6	10	13	14	17	11	23	14	9	273	150	0.000747751	0.0273257	0.594,0.676,0.542	0.251,0.4,0.402	0.253	22	37	48	31	41	20
86463	ENSG00000125462	C1orf61	chr1	-	156414653	156414753	156407841	156407975	156421554	156421752	86463	17	28	6	0	0	0	11	4	13	2	5	3	249	150	1.04147e-07	2.14859e-05	1.0,1.0,1.0	0.768,0.325,0.723	0.395	17	13	28	9	6	16
86573	ENSG00000163138	PACRGL	chr4	+	20702140	20702221	20700457	20700787	20704465	20704524	86573	28	6	22	2	30	40	0	11	5	49	49	50	230	150	0.000844021	0.0299256	0.901,0.115,0.264	0.0,0.128,0.061	0.364	30	49	36	60	62	55
86577	ENSG00000163138	PACRGL	chr4	+	20702140	20702221	20701757	20701884	20704465	20704524	86577	38	11	21	2	3	2	0	13	5	4	5	9	230	150	4.34681e-05	0.0031081	0.925,0.705,0.873	0.0,0.629,0.266	0.536	40	4	14	18	23	14
87087	ENSG00000105341	DMAC2	chr19	-	41433271	41433434	41431318	41432408	41433536	41433673	87087	818	1031	897	127	125	135	709	704	816	311	303	328	300	150	0	0	0.763,0.805,0.769	0.533,0.537,0.554	0.238	945	1020	1156	1007	1032	1144
88024	ENSG00000123352	SPATS2	chr12	+	49387053	49387137	49367464	49367587	49441729	49441816	88024	2	9	8	11	10	10	0	1	2	6	8	12	233	150	0.000299564	0.0138821	0.105,0.367,0.34	0.0,0.074,0.097	0.214	13	6	19	9	18	14
88317	ENSG00000172269	DPAGT1	chr11	-	119097854	119097925	119097141	119097297	119098402	119098487	88317	9	9	9	0	0	0	5	22	16	6	5	2	220	150	4.35695e-07	7.36391e-05	1.0,1.0,1.0	0.362,0.75,0.845	0.348	9	11	9	27	9	18
88628	ENSG00000111596	CNOT2	chr12	+	70294236	70294294	70278131	70278274	70297758	70297879	88628	24	22	22	0	0	0	13	13	11	0	5	6	207	150	1.22907e-06	0.000174436	1.0,1.0,1.0	1.0,0.653,0.571	0.259	24	13	22	18	22	17
88653	ENSG00000111596	CNOT2	chr12	+	70329422	70329570	70310894	70311017	70335437	70335464	88653	2	2	2	0	0	0	6	0	2	2	2	6	297	150	7.49109e-11	3.07187e-08	1.0,1.0,1.0	0.602,0.0,0.144	0.751	2	8	2	2	2	8
88894	ENSG00000108423	TUBD1	chr17	-	59866608	59866749	59859481	59860424	59878102	59878334	88894	5	10	4	0	0	0	5	16	14	4	2	0	290	150	0.00109163	0.0365058	1.0,1.0,1.0	0.393,0.805,1.0	0.267	5	9	10	18	4	14
89361	ENSG00000278023	RDM1	chr17	-	35922576	35922675	35920186	35920272	35925514	35925637	89361	4	4	5	0	0	0	7	13	15	1	2	3	248	150	0.00045748	0.0190568	1.0,1.0,1.0	0.809,0.797,0.752	0.214	4	8	4	15	5	18
89566	ENSG00000135622	SEMA4F	chr2	+	74662731	74662825	74657564	74657624	74673456	74673499	89566	17	19	9	2	1	0	17	14	26	11	4	10	243	150	1.55527e-05	0.0013869	0.84,0.921,1.0	0.488,0.684,0.616	0.324	19	28	20	18	9	36
89632	ENSG00000130714	POMT1	chr9	+	131509902	131510062	131508910	131509022	131510259	131510311	89632	9	16	13	0	0	2	13	10	10	4	2	4	300	150	0.000125784	0.00712256	1.0,1.0,0.765	0.619,0.714,0.556	0.292	9	17	16	12	15	14
89673	ENSG00000139350	NEDD1	chr12	+	96907603	96907624	96907229	96907300	96917620	96917737	89673	2	6	2	13	11	6	0	0	0	22	18	16	170	150	1.34275e-06	0.000188432	0.12,0.325,0.227	0.0,0.0,0.0	0.224	15	22	17	18	8	16
91143	ENSG00000238083	LRRC37A2	chr17	+	46512315	46515321	46511510	46511608	46517361	46517433	91143	8	2	4	0	1	0	10	4	5	0	4	2	300	150	0.00109943	0.0366929	1.0,0.5,1.0	1.0,0.333,0.556	0.204	8	10	3	8	4	7
91232	ENSG00000005801	ZNF195	chr11	-	3360719	3360788	3357927	3360565	3370942	3371070	91232	30	19	24	0	6	5	12	10	16	21	7	10	218	150	3.81593e-05	0.00280331	1.0,0.685,0.768	0.282,0.496,0.524	0.384	30	33	25	17	29	26
92072	ENSG00000131379	C3orf20	chr3	+	14726900	14727024	14721652	14721784	14728438	14728688	92072	32	34	42	1	0	0	2	3	4	4	9	10	273	150	0	0	0.946,1.0,1.0	0.216,0.155,0.18	0.798	33	6	34	12	42	14
92890	ENSG00000188690	UROS	chr10	-	125792578	125792744	125785516	125785839	125794879	125794978	92890	3	11	2	3	9	2	0	0	0	5	8	4	300	150	1.6362e-08	4.11341e-06	0.333,0.379,0.333	0.0,0.0,0.0	0.348	6	5	20	8	4	4
92917	ENSG00000188690	UROS	chr10	-	125816176	125816260	125812213	125812288	125823028	125823039	92917	2	3	5	1	0	2	0	1	3	10	7	9	233	150	4.32904e-06	0.000499022	0.563,1.0,0.617	0.0,0.084,0.177	0.64	3	10	3	8	7	12
93048	ENSG00000205643	CDPF1	chr22	-	46248171	46248284	46247109	46247221	46250255	46250289	93048	32	52	42	0	3	0	84	36	39	6	12	14	262	150	5.37282e-07	8.62902e-05	1.0,0.908,1.0	0.889,0.632,0.615	0.257	32	90	55	48	42	53
93251	ENSG00000132780	NASP	chr1	+	45616700	45616703	45616336	45616393	45617462	45617591	93251	11	7	13	2	19	4	0	8	3	20	13	21	152	150	0.000574066	0.0225872	0.844,0.267,0.762	0.0,0.378,0.124	0.457	13	20	26	21	17	24
93407	ENSG00000165912	PACSIN3	chr11	-	47182673	47182809	47182402	47182559	47183003	47183069	93407	10	7	2	0	0	0	4	4	3	5	0	1	285	150	0.000477264	0.0196654	1.0,1.0,1.0	0.296,1.0,0.612	0.364	10	9	7	4	2	4
93516	ENSG00000089693	MLF2	chr12	-	6750176	6750305	6748766	6748982	6751640	6751676	93516	5	6	6	2	9	4	0	3	0	7	2	11	278	150	0.000334175	0.0150412	0.574,0.265,0.447	0.0,0.447,0.0	0.28	7	7	15	5	10	11
93541	ENSG00000254319	AC246817.2	chr8	-	2678856	2678939	2674729	2674845	2705214	2705286	93541	4	7	9	6	20	11	0	2	4	17	17	26	232	150	0.000118433	0.00679087	0.301,0.185,0.346	0.0,0.071,0.09	0.224	10	17	27	19	20	30
93994	ENSG00000204514	ZNF814	chr19	-	57858814	57858983	57850319	57850561	57868457	57868579	93994	3	3	9	0	0	0	0	0	2	2	2	2	300	150	7.12674e-12	3.47844e-09	1.0,1.0,1.0	0.0,0.0,0.333	0.889	3	2	3	2	9	4
94014	ENSG00000204514	ZNF814	chr19	-	57876915	57877042	57850314	57850561	57888766	57888780	94014	91	140	103	17	24	11	146	94	135	54	40	64	276	150	1.60183e-07	3.14264e-05	0.744,0.76,0.836	0.595,0.561,0.534	0.217	108	200	164	134	114	199
94628	ENSG00000099377	HSD3B7	chr16	+	30986839	30987002	30986604	30986704	30987767	30989152	94628	26	18	24	0	0	1	13	7	13	0	2	4	300	150	0.000961975	0.0331447	1.0,1.0,0.923	1.0,0.636,0.619	0.223	26	13	18	9	25	17
94954	ENSG00000223482	NUTM2A-AS1	chr10	-	87246114	87246212	87238666	87238849	87288441	87288495	94954	68	81	98	3	1	0	73	64	78	13	9	18	247	150	7.14696e-11	2.94281e-08	0.932,0.98,1.0	0.773,0.812,0.725	0.201	71	86	82	73	98	96
95892	ENSG00000156398	SFXN2	chr10	+	102717702	102717780	102715222	102715328	102726611	102726657	95892	10	16	13	2	0	1	17	2	12	8	6	1	227	150	0.000923603	0.0320433	0.768,1.0,0.896	0.584,0.181,0.888	0.337	12	25	16	8	14	13
96289	ENSG00000113845	TIMMDC1	chr3	+	119500694	119500860	119498816	119498933	119513640	119513719	96289	3	20	15	0	0	0	6	4	7	0	2	4	300	150	0.000165531	0.00883807	1.0,1.0,1.0	1.0,0.5,0.467	0.344	3	6	20	6	15	11
96402	ENSG00000143127	ITGA10	chr1	-	145899174	145899341	145898935	145899078	145900056	145900187	96402	10	29	6	1	0	0	6	4	10	4	1	1	300	150	0.000170964	0.00905568	0.833,1.0,1.0	0.429,0.667,0.833	0.301	11	10	29	5	6	11
96593	ENSG00000042317	SPATA7	chr14	+	88393392	88393488	88391380	88391455	88396155	88396184	96593	22	13	7	7	13	2	8	8	4	15	13	12	245	150	0.00146808	0.0452949	0.658,0.38,0.682	0.246,0.274,0.169	0.344	29	23	26	21	9	16
96663	ENSG00000172888	ZNF621	chr3	+	40529494	40529575	40525778	40525864	40530208	40530316	96663	16	18	13	15	18	25	7	1	7	20	15	23	230	150	0.000904189	0.0315338	0.41,0.395,0.253	0.186,0.042,0.166	0.221	31	27	36	16	38	30
96685	ENSG00000126804	ZBTB1	chr14	+	64516599	64516751	64511248	64511384	64521486	64521606	96685	169	152	140	0	1	1	43	68	58	13	21	13	300	150	0	0	1.0,0.987,0.986	0.623,0.618,0.69	0.347	169	56	153	89	141	71
97120	ENSG00000167508	MVD	chr16	-	88662711	88662907	88662114	88662167	88663010	88663046	97120	11	1	6	8	13	6	1	0	1	18	3	10	300	150	1.55941e-05	0.00138694	0.407,0.037,0.333	0.027,0.0,0.048	0.234	19	19	14	3	12	11
97136	ENSG00000113391	FAM172A	chr5	-	94074645	94074769	94053125	94053227	94111510	94111635	97136	127	94	110	20	51	35	104	80	92	82	78	76	273	150	5.66633e-05	0.00382045	0.777,0.503,0.633	0.411,0.36,0.399	0.248	147	186	145	158	145	168
97270	ENSG00000111788	AC009533.1	chr12	+	9311140	9311290	9310338	9310441	9311549	9311618	97270	136	80	117	8	15	8	26	51	50	12	11	12	299	150	0.000993577	0.033953	0.895,0.728,0.88	0.521,0.699,0.676	0.202	144	38	95	62	125	62
97302	ENSG00000166024	R3HCC1L	chr10	+	98156092	98156147	98134670	98134706	98162882	98162975	97302	25	18	20	18	4	7	22	20	9	25	20	28	204	150	0.00135185	0.0426156	0.505,0.768,0.678	0.393,0.424,0.191	0.314	43	47	22	40	27	37
97505	ENSG00000197283	SYNGAP1	chr6	+	33448788	33448868	33447842	33447933	33451759	33452395	97505	110	87	68	30	26	32	48	29	33	31	26	27	229	150	0.000179951	0.00940721	0.706,0.687,0.582	0.504,0.422,0.445	0.201	140	79	113	55	100	60
97784	ENSG00000100697	DICER1	chr14	-	95141682	95141748	95133314	95133503	95157390	95157486	97784	10	8	6	4	2	2	2	1	7	3	14	9	215	150	8.18608e-05	0.00509058	0.636,0.736,0.677	0.317,0.047,0.352	0.444	14	5	10	15	8	16
98201	ENSG00000167778	SPRYD3	chr12	-	53074648	53075219	53068290	53068304	53077114	53077261	98201	26	4	14	0	1	0	6	8	11	4	2	1	300	150	9.58146e-05	0.00576484	1.0,0.667,1.0	0.429,0.667,0.846	0.242	26	10	5	10	14	12
98512	ENSG00000168477	TNXB	chr6	-	32052669	32052993	32049997	32050321	32053387	32053705	98512	15	4	13	0	1	5	2	2	0	2	2	3	300	150	0.000270839	0.0128677	1.0,0.667,0.565	0.333,0.333,0.0	0.522	15	4	5	4	18	3
98649	ENSG00000174371	EXO1	chr1	+	241849111	241849216	241848730	241849027	241850408	241850586	98649	163	167	145	47	49	61	143	71	137	91	82	123	254	150	6.00886e-08	1.3231e-05	0.672,0.668,0.584	0.481,0.338,0.397	0.236	210	234	216	153	206	260
98808	ENSG00000165028	NIPSNAP3B	chr9	+	104770848	104770998	104768862	104769021	104772821	104772908	98808	20	14	5	0	0	0	16	15	34	4	3	2	299	150	8.37841e-06	0.00085195	1.0,1.0,1.0	0.667,0.715,0.895	0.241	20	20	14	18	5	36
98836	ENSG00000119509	INVS	chr9	+	100214924	100215040	100126382	100126549	100215400	100215488	98836	27	49	53	6	8	12	12	18	32	12	11	21	265	150	2.32467e-05	0.00189684	0.718,0.776,0.714	0.361,0.481,0.463	0.301	33	24	57	29	65	53
99384	ENSG00000260778	AC009065.4	chr16	+	2271675	2271891	2268662	2268843	2272986	2273124	99384	13	8	13	0	0	0	12	17	11	1	2	4	300	150	4.96748e-05	0.00344682	1.0,1.0,1.0	0.857,0.81,0.579	0.251	13	13	8	19	13	15
99615	ENSG00000147144	CCDC120	chrX	+	49065035	49065098	49064369	49064664	49065453	49065628	99615	37	22	21	0	0	0	24	49	37	9	4	8	212	150	3.91197e-08	8.99815e-06	1.0,1.0,1.0	0.654,0.897,0.766	0.228	37	33	22	53	21	45
100014	ENSG00000093167	LRRFIP2	chr3	-	37110990	37111065	37096615	37096660	37112914	37112980	100014	2	2	5	0	0	0	6	4	11	6	1	8	224	150	5.79364e-09	1.64219e-06	1.0,1.0,1.0	0.401,0.728,0.479	0.464	2	12	2	5	5	19
100450	ENSG00000012061	ERCC1	chr19	-	45420323	45420427	45416490	45416897	45423269	45423381	100450	8	7	8	0	0	1	8	3	4	4	0	5	253	150	4.10483e-05	0.0029827	1.0,1.0,0.826	0.542,1.0,0.322	0.321	8	12	7	3	9	9
102172	ENSG00000108823	SGCA	chr17	+	50170142	50170351	50168373	50168572	50170639	50170666	102172	6	4	0	0	1	9	0	0	2	5	6	5	300	150	0.00104695	0.0352829	1.0,0.667,0.0	0.0,0.0,0.167	0.5	6	5	5	6	9	7
102317	ENSG00000184465	WDR27	chr6	-	169638538	169638660	169634427	169634525	169658275	169658358	102317	12	17	24	5	0	0	16	8	10	7	14	4	271	150	0.000229852	0.0113684	0.571,1.0,1.0	0.559,0.24,0.58	0.397	17	23	17	22	24	14
102944	ENSG00000136167	LCP1	chr13	-	46203100	46203230	46183908	46183972	46211731	46211871	102944	7	4	8	5	1	0	2	0	0	0	2	2	279	150	0.00154536	0.0469127	0.429,0.683,1.0	1.0,0.0,0.0	0.371	12	2	5	2	8	2
103236	ENSG00000126091	ST3GAL3	chr1	+	43858134	43858308	43838218	43838311	43879334	43879507	103236	15	14	18	1	0	0	7	12	19	5	2	3	300	150	7.52435e-06	0.00078017	0.882,1.0,1.0	0.412,0.75,0.76	0.32	16	12	14	14	18	22
103546	ENSG00000126001	CEP250	chr20	+	35458303	35458374	35455174	35455237	35459982	35460105	103546	43	15	19	1	0	0	11	17	23	6	4	2	220	150	1.9182e-06	0.000255906	0.967,1.0,1.0	0.556,0.743,0.887	0.26	44	17	15	21	19	25
103610	ENSG00000167377	ZNF23	chr16	-	71453242	71453350	71447596	71449882	71456763	71456828	103610	3	5	2	0	0	2	4	2	3	2	1	4	257	150	0.00166729	0.0494782	1.0,1.0,0.369	0.539,0.539,0.304	0.329	3	6	5	3	4	7
103684	ENSG00000175611	LINC00476	chr9	-	95850226	95850292	95813292	95813922	95875864	95875977	103684	3	5	5	7	4	8	2	0	3	6	21	16	215	150	0.00103189	0.0349519	0.23,0.466,0.304	0.189,0.0,0.116	0.232	10	8	9	21	13	19
103739	ENSG00000073849	ST6GAL1	chr3	+	186996547	186996673	186963784	186963926	187038741	187038873	103739	347	484	445	237	201	276	294	243	273	486	485	480	275	150	0	0	0.444,0.568,0.468	0.248,0.215,0.237	0.26	584	780	685	728	721	753
103742	ENSG00000073849	ST6GAL1	chr3	+	187038391	187038491	186930778	186930834	187038741	187038873	103742	22	30	27	2	2	0	10	23	35	11	2	11	249	150	0.00023358	0.0115004	0.869,0.9,1.0	0.354,0.874,0.657	0.295	24	21	32	25	27	46
104928	ENSG00000117691	NENF	chr1	+	212442545	212442625	212432972	212433120	212445829	212446372	104928	5	4	11	0	0	0	6	0	0	0	4	4	229	150	1.12659e-07	2.31464e-05	1.0,1.0,1.0	1.0,0.0,0.0	0.667	5	6	4	4	11	4
105652	ENSG00000026508	CD44	chr11	+	35198120	35198246	35189834	35189972	35204511	35204640	105652	11	21	2	0	2	0	0	7	2	2	2	2	275	150	2.35918e-05	0.00191672	1.0,0.851,1.0	0.0,0.656,0.353	0.614	11	2	23	9	2	4
105665	ENSG00000026508	CD44	chr11	+	35198147	35198246	35190009	35190065	35201081	35201195	105665	13	3	8	5	2	0	4	0	4	12	6	4	248	150	0.000325495	0.0147634	0.611,0.476,1.0	0.168,0.0,0.377	0.514	18	16	5	6	8	8
105745	ENSG00000251365	LINC02236	chr5	+	6777049	6777158	6775817	6776029	6777333	6777509	105745	1	2	4	2	0	0	0	0	2	2	2	0	258	150	9.90094e-05	0.00591085	0.225,1.0,1.0	0.0,0.0,1.0	0.408	3	2	2	2	4	2
105961	ENSG00000276291	FRG1HP	chr9	+	41008880	41009006	40994632	40994699	41011616	41011730	105961	156	176	183	0	0	0	113	95	99	28	16	23	275	150	0	0	1.0,1.0,1.0	0.688,0.764,0.701	0.282	156	141	176	111	183	122
105965	ENSG00000118432	CNR1	chr6	-	88164256	88164294	88147663	88147806	88165802	88165915	105965	12	10	15	0	13	10	0	0	1	3	2	4	187	150	4.28518e-07	7.3043e-05	1.0,0.382,0.546	0.0,0.0,0.167	0.587	12	3	23	2	25	5
106040	ENSG00000112303	VNN2	chr6	-	132753827	132753949	132752723	132752749	132755842	132756035	106040	40	46	71	49	47	55	12	1	6	30	23	32	271	150	2.6319e-08	6.3e-06	0.311,0.351,0.417	0.181,0.023,0.094	0.26	89	42	93	24	126	38
106191	ENSG00000157741	UBN2	chr7	+	139282004	139282055	139279317	139279360	139283023	139284574	106191	29	20	36	0	0	0	18	33	20	6	7	4	200	150	7.82819e-09	2.12844e-06	1.0,1.0,1.0	0.692,0.78,0.789	0.246	29	24	20	40	36	24
106286	ENSG00000177990	DPY19L2	chr12	-	63569223	63569349	63558912	63560662	63570757	63570857	106286	3	7	4	0	0	0	9	8	11	2	1	7	275	150	1.99827e-07	3.80115e-05	1.0,1.0,1.0	0.711,0.814,0.462	0.338	3	11	7	9	4	18
106686	ENSG00000168961	LGALS9	chr17	+	27643524	27643581	27642237	27642348	27645860	27645911	106686	426	410	573	264	357	286	288	193	262	441	340	449	206	150	1.89593e-12	1.01182e-09	0.54,0.455,0.593	0.322,0.292,0.298	0.225	690	729	767	533	859	711
106795	ENSG00000275778	AC018630.2	chr12	-	10882216	10882698	10848371	10848407	11171421	11171598	106795	5	9	7	0	0	1	12	8	10	7	0	4	300	150	7.07164e-05	0.00455613	1.0,1.0,0.778	0.462,1.0,0.556	0.253	5	19	9	8	8	14
107018	ENSG00000183458	AC138932.1	chr16	+	14919244	14919428	14918454	14919126	14920271	14920387	107018	11	15	8	1	0	0	6	13	14	2	3	3	300	150	4.19661e-05	0.00303177	0.846,1.0,1.0	0.6,0.684,0.7	0.287	12	8	15	16	8	17
107376	ENSG00000168488	ATXN2L	chr16	+	28836325	28836490	28835932	28836176	28836747	28837237	107376	34	25	51	0	2	3	23	18	26	10	8	7	300	150	4.94797e-07	8.15616e-05	1.0,0.862,0.895	0.535,0.529,0.65	0.348	34	33	27	26	54	33
107573	ENSG00000114026	OGG1	chr3	+	9756766	9756816	9754703	9754885	9765808	9766737	107573	8	9	11	0	0	0	17	5	8	2	2	6	199	150	6.78609e-07	0.000105108	1.0,1.0,1.0	0.865,0.653,0.501	0.327	8	19	9	7	11	14
108184	ENSG00000104660	LEPROTL1	chr8	+	30104299	30104486	30095409	30095528	30137271	30138348	108184	24	11	13	0	2	1	2	9	10	4	8	2	300	150	3.59221e-05	0.00267231	1.0,0.733,0.867	0.2,0.36,0.714	0.442	24	6	13	17	14	12
108300	ENSG00000130159	ECSIT	chr19	-	11525639	11525737	11519074	11519193	11528744	11528865	108300	4	7	2	5	4	4	0	0	0	6	10	6	247	150	2.85288e-08	6.78031e-06	0.327,0.515,0.233	0.0,0.0,0.0	0.358	9	6	11	10	6	6
108909	ENSG00000009790	TRAF3IP3	chr1	+	209779314	209779374	209775598	209775736	209782055	209782307	108909	3	2	2	1	0	0	0	0	6	2	3	0	209	150	1.92805e-05	0.00163487	0.683,1.0,1.0	0.0,0.0,1.0	0.561	4	2	2	3	2	6
108936	ENSG00000186376	ZNF75D	chrX	-	135295767	135296039	135291008	135291135	135343260	135344087	108936	14	8	5	2	0	0	7	7	14	1	2	4	300	150	0.00164082	0.048922	0.778,1.0,1.0	0.778,0.636,0.636	0.243	16	8	8	9	5	18
109054	ENSG00000131069	ACSS2	chr20	+	34926104	34926281	34925697	34925766	34926876	34926938	109054	94	98	75	0	5	0	101	117	130	25	17	15	300	150	8.13246e-10	2.72144e-07	1.0,0.907,1.0	0.669,0.775,0.813	0.217	94	126	103	134	75	145
109245	ENSG00000148950	IMMP1L	chr11	-	31456259	31456386	31452197	31453092	31509518	31509563	109245	31	25	21	2	0	0	21	8	17	6	8	3	276	150	4.28203e-07	7.3043e-05	0.894,1.0,1.0	0.655,0.352,0.755	0.377	33	27	25	16	21	20
110149	ENSG00000183137	CEP57L1	chr6	+	109100191	109100286	109095152	109095575	109145218	109145307	110149	16	8	10	0	0	8	8	5	6	12	15	6	244	150	8.20517e-05	0.00509612	1.0,1.0,0.435	0.291,0.17,0.381	0.531	16	20	8	20	18	12
110244	ENSG00000248487	ABHD14A	chr3	+	51978258	51978374	51975025	51975204	51980835	51981196	110244	6	8	8	0	0	0	5	13	28	5	8	1	265	150	3.81947e-07	6.64634e-05	1.0,1.0,1.0	0.361,0.479,0.941	0.406	6	10	8	21	8	29
110374	ENSG00000173915	ATP5MD	chr10	-	103394198	103394394	103392370	103392466	103395745	103396032	110374	268	234	219	333	384	353	42	32	38	443	316	465	300	150	0	0	0.287,0.234,0.237	0.045,0.048,0.039	0.209	601	485	618	348	572	503
110600	ENSG00000088340	FER1L4	chr20	-	35585123	35585276	35583939	35584093	35595476	35595593	110600	5	9	9	7	2	6	0	0	0	6	3	3	300	150	1.29568e-08	3.31606e-06	0.263,0.692,0.429	0.0,0.0,0.0	0.461	12	6	11	3	15	3
111309	ENSG00000061656	SPAG4	chr20	+	35617519	35617586	35616879	35617240	35619194	35619310	111309	32	8	15	1	0	1	7	2	10	3	3	2	216	150	2.86041e-05	0.00221692	0.957,1.0,0.912	0.618,0.316,0.776	0.386	33	10	8	5	16	12
111319	ENSG00000061656	SPAG4	chr20	+	35618449	35618720	35617045	35617240	35619194	35619310	111319	5	7	3	1	0	1	2	2	0	3	3	2	300	150	1.7008e-06	0.000231188	0.714,1.0,0.6	0.25,0.25,0.0	0.605	6	5	7	5	4	2
111452	ENSG00000206149	HERC2P9	chr15	+	28629265	28629441	28612058	28612173	28632636	28632807	111452	5	25	7	0	1	0	15	18	17	9	7	0	300	150	1.55941e-05	0.00138694	1.0,0.926,1.0	0.455,0.563,1.0	0.303	5	24	26	25	7	17
111716	ENSG00000205593	DENND6B	chr22	-	50316565	50316626	50316369	50316475	50317292	50317373	111716	5	4	5	3	0	0	5	4	4	5	11	5	210	150	0.000155124	0.00840802	0.543,1.0,1.0	0.417,0.206,0.364	0.519	8	10	4	15	5	9
111717	ENSG00000205593	DENND6B	chr22	-	50316565	50316712	50316369	50316475	50317292	50317373	111717	4	7	6	3	0	0	9	5	4	5	11	5	296	150	0.000678598	0.0255019	0.403,1.0,1.0	0.477,0.187,0.288	0.484	7	14	7	16	6	9
112570	ENSG00000110756	HPS5	chr11	-	18317750	18317907	18311386	18311451	18322076	18322198	112570	5	22	15	0	0	0	6	15	11	6	5	2	300	150	3.36301e-09	9.92604e-07	1.0,1.0,1.0	0.333,0.6,0.733	0.445	5	12	22	20	15	13
112833	ENSG00000122085	MTERF4	chr2	-	241095129	241096438	241094276	241094432	241102252	241102295	112833	3	10	2	3	3	4	7	1	5	21	33	30	300	150	0.00059437	0.0231314	0.333,0.625,0.2	0.143,0.015,0.077	0.308	6	28	13	34	6	35
113059	ENSG00000224699	LAMTOR5-AS1	chr1	+	110414151	110414231	110408652	110409158	110416008	110416089	113059	10	2	3	0	1	0	2	2	5	0	4	2	229	150	0.000740923	0.0271456	1.0,0.567,1.0	1.0,0.247,0.621	0.233	10	2	3	6	3	7
113128	ENSG00000187109	NAP1L1	chr12	-	76060137	76060279	76056032	76056161	76084566	76084685	113128	107	102	113	0	2	1	65	66	86	3	28	34	291	150	2.24426e-11	9.84859e-09	1.0,0.963,0.983	0.918,0.549,0.566	0.304	107	68	104	94	114	120
113132	ENSG00000187109	NAP1L1	chr12	-	76067370	76067473	76056032	76056161	76084566	76084735	113132	23	16	49	0	2	1	45	42	38	3	28	34	252	150	2.10087e-06	0.000276225	1.0,0.826,0.967	0.899,0.472,0.399	0.341	23	48	18	70	50	72
113485	ENSG00000006282	SPATA20	chr17	+	50547719	50547954	50547128	50547285	50548282	50548453	113485	18	17	24	11	5	9	17	13	11	48	35	60	300	150	2.42769e-11	1.05612e-08	0.45,0.63,0.571	0.15,0.157,0.084	0.42	29	65	22	48	33	71
113644	ENSG00000235437	LINC01278	chrX	-	63516909	63517082	63509941	63510079	63560831	63560993	113644	26	36	21	1	2	2	15	15	13	15	2	8	300	150	4.92975e-05	0.00342539	0.929,0.9,0.84	0.333,0.789,0.448	0.366	27	30	38	17	23	21
113778	ENSG00000188493	C19orf54	chr19	-	40742072	40742189	40740855	40741439	40743914	40743981	113778	3	6	4	2	0	3	0	0	2	3	3	3	266	150	2.32799e-05	0.00189684	0.458,1.0,0.429	0.0,0.0,0.273	0.538	5	3	6	3	7	5
114669	ENSG00000081189	MEF2C	chr5	-	88839378	88839623	88823860	88823927	88877941	88877999	114669	2	6	1	0	0	2	2	1	0	3	2	4	300	150	3.43449e-05	0.00257605	1.0,1.0,0.2	0.25,0.2,0.0	0.583	2	5	6	3	3	4
115038	ENSG00000244687	UBE2V1	chr20	-	50096482	50096534	50094914	50095382	50096671	50096820	115038	7	5	3	4	1	0	4	1	2	6	4	5	201	150	0.00103524	0.0349719	0.566,0.789,1.0	0.332,0.157,0.23	0.545	11	10	6	5	3	7
115112	ENSG00000196670	ZFP62	chr5	-	180851987	180852060	180847614	180851493	180861214	180861276	115112	23	15	14	1	0	0	12	6	7	2	4	1	222	150	7.82167e-05	0.00492634	0.94,1.0,1.0	0.802,0.503,0.825	0.27	24	14	15	10	14	8
115283	ENSG00000185215	TNFAIP2	chr14	+	103124374	103124506	103123460	103123483	103126309	103126575	115283	55	76	50	32	126	53	5	6	4	23	30	7	281	150	4.9181e-05	0.00342205	0.478,0.244,0.335	0.104,0.096,0.234	0.208	87	28	202	36	103	11
115750	ENSG00000137210	TMEM14B	chr6	+	10751132	10751234	10749201	10749268	10770076	10770204	115750	4	9	3	2	0	1	2	2	3	2	2	4	251	150	0.00165489	0.0491784	0.544,1.0,0.642	0.374,0.374,0.309	0.376	6	4	9	4	4	7
116138	ENSG00000103275	UBE2I	chr16	+	1312346	1312667	1309802	1310253	1314019	1314096	116138	10	9	10	9	14	7	0	5	4	13	15	11	300	150	0.000537828	0.0215254	0.357,0.243,0.417	0.0,0.143,0.154	0.24	19	13	23	20	17	15
116724	ENSG00000099290	WASHC2A	chr10	+	50099977	50100064	50097674	50097802	50104041	50104143	116724	127	147	114	43	40	46	75	63	82	53	49	70	236	150	3.09925e-07	5.56736e-05	0.652,0.7,0.612	0.474,0.45,0.427	0.204	170	128	187	112	160	152
116976	ENSG00000196511	TPK1	chr7	-	144681806	144681864	144667725	144667846	144682908	144682978	116976	8	8	3	0	1	3	0	0	3	4	5	13	207	150	5.32751e-08	1.1872e-05	1.0,0.853,0.42	0.0,0.0,0.143	0.71	8	4	9	5	6	16
117457	ENSG00000261520	DLGAP1-AS5	chr18	+	4275300	4275379	4264632	4264901	4280729	4280982	117457	6	2	3	0	0	0	0	0	0	6	3	6	228	150	0	0	1.0,1.0,1.0	0.0,0.0,0.0	1	6	6	2	3	3	6
117874	ENSG00000034152	MAP2K3	chr17	+	21296085	21296210	21295674	21295769	21298412	21298444	117874	32	21	18	0	0	0	20	7	10	6	0	2	274	150	1.50135e-05	0.00135456	1.0,1.0,1.0	0.646,1.0,0.732	0.207	32	26	21	7	18	12
118761	ENSG00000196998	WDR45	chrX	-	49076190	49076275	49075938	49075978	49076429	49076524	118761	4	10	11	2	16	6	0	0	0	12	9	11	234	150	1.20021e-10	4.76543e-08	0.562,0.286,0.54	0.0,0.0,0.0	0.463	6	12	26	9	17	11
118935	ENSG00000170113	NIPA1	chr15	+	22814082	22814153	22812162	22812253	22819287	22819416	118935	22	23	27	2	0	4	21	10	5	6	4	5	220	150	0.000849811	0.0300777	0.882,1.0,0.822	0.705,0.63,0.405	0.321	24	27	23	14	31	10
119182	ENSG00000134030	CTIF	chr18	+	48539757	48539831	48539157	48539312	48619537	48619745	119182	0	8	2	5	1	6	0	0	0	12	3	7	223	150	0.000707983	0.0262657	0.0,0.843,0.183	0.0,0.0,0.0	0.342	5	12	9	3	8	7
120333	ENSG00000183742	MACC1	chr7	-	20184988	20185078	20161747	20161870	20198524	20198670	120333	9	13	6	0	13	10	0	0	0	6	2	2	239	150	2.9064e-08	6.89112e-06	1.0,0.386,0.274	0.0,0.0,0.0	0.553	9	6	26	2	16	2
12	ENSG00000170946	DNAJC24	chr11	+	31407455	31407543	31370715	31370859	31408109	31408175	12	5	2	2	1	4	6	2	5	4	0	0	2	237	150	0.00024531	0.0119184	0.76,0.24,0.174	1.0,1.0,0.559	-0.462	6	2	6	5	8	6
208	ENSG00000125952	MAX	chr14	-	65077562	65077643	65077384	65077428	65077912	65078036	208	0	0	0	42	9	23	8	10	17	2	3	4	230	150	0	0	0.0,0.0,0.0	0.723,0.685,0.735	-0.714	42	10	9	13	23	21
230	ENSG00000075234	TTC38	chr22	+	46292202	46292328	46289401	46289561	46292790	46292933	230	83	54	62	5	12	12	68	41	71	0	0	0	275	150	1.68489e-10	6.60519e-08	0.901,0.711,0.738	1.0,1.0,1.0	-0.217	88	68	66	41	74	71
827	ENSG00000144182	LIPT1	chr2	+	99155481	99155544	99155073	99155368	99156300	99156426	827	12	20	12	6	1	6	9	9	12	0	0	0	212	150	4.5372e-07	7.61709e-05	0.586,0.934,0.586	1.0,1.0,1.0	-0.298	18	9	21	9	18	12
2343	ENSG00000123349	PFDN5	chr12	+	53296453	53296551	53295838	53295941	53297849	53297924	2343	44	29	28	24	20	0	30	35	33	5	0	0	247	150	0.0013171	0.0417967	0.527,0.468,1.0	0.785,1.0,1.0	-0.263	68	35	49	35	28	33
2462	ENSG00000148516	ZEB1	chr10	+	31373017	31373173	31319215	31319292	31387123	31387266	2462	35	14	17	6	17	18	6	26	19	0	0	2	300	150	1.5487e-07	3.06241e-05	0.745,0.292,0.321	1.0,1.0,0.826	-0.489	41	6	31	26	35	21
2710	ENSG00000182944	EWSR1	chr22	+	29288986	29289062	29288605	29288755	29292136	29292169	2710	0	0	0	5	10	10	2	3	2	0	0	2	225	150	3.128e-09	9.34263e-07	0.0,0.0,0.0	1.0,1.0,0.4	-0.8	5	2	10	3	10	4
3556	ENSG00000144935	TRPC1	chr3	+	142792823	142792967	142791018	142791158	142802168	142802344	3556	3	5	1	0	3	2	4	2	4	0	0	0	293	150	0.000616686	0.0237531	1.0,0.46,0.204	1.0,1.0,1.0	-0.445	3	4	8	2	3	4
3570	ENSG00000170638	TRABD	chr22	+	50197448	50197588	50194899	50195040	50198074	50198186	3570	32	21	15	10	12	12	28	34	19	1	0	0	289	150	1.75959e-12	9.46557e-10	0.624,0.476,0.393	0.936,1.0,1.0	-0.481	42	29	33	34	27	19
4074	ENSG00000184574	LPAR5	chr12	-	6631584	6631671	6620432	6621464	6635906	6635960	4074	10	19	14	23	43	38	130	122	119	46	39	44	236	150	0	0	0.217,0.219,0.19	0.642,0.665,0.632	-0.438	33	176	62	161	52	163
4513	ENSG00000161958	FGF11	chr17	+	7442593	7442792	7441775	7441879	7443075	7443331	4513	255	86	140	51	30	22	103	29	23	3	0	2	300	150	1.1451e-07	2.34786e-05	0.714,0.589,0.761	0.945,1.0,0.852	-0.244	306	106	116	29	162	25
4575	ENSG00000129158	SERGEF	chr11	-	18010070	18010139	18007940	18008076	18012850	18012898	4575	25	40	30	72	59	47	62	45	74	37	39	52	218	150	2.96254e-06	0.000365954	0.193,0.318,0.305	0.536,0.443,0.495	-0.219	97	99	99	84	77	126
4767	ENSG00000138386	NAB1	chr2	+	190655976	190656153	190649845	190649982	190659276	190659585	4767	28	26	6	5	5	4	17	15	19	0	2	0	300	150	5.919e-05	0.00394562	0.737,0.722,0.429	1.0,0.789,1.0	-0.3	33	17	31	17	10	19
5222	ENSG00000166435	XRRA1	chr11	-	74851988	74852082	74850869	74851203	74906238	74906352	5222	77	65	66	16	26	15	45	40	18	0	0	0	243	150	6.18061e-13	3.53379e-10	0.748,0.607,0.731	1.0,1.0,1.0	-0.305	93	45	91	40	81	18
6201	ENSG00000101104	PABPC1L	chr20	+	44918905	44919045	44912659	44912853	44921593	44921731	6201	5	3	8	4	2	0	4	4	3	0	0	1	289	150	0.00072947	0.0268637	0.393,0.438,1.0	1.0,1.0,0.609	-0.259	9	4	5	4	8	4
6447	ENSG00000106603	COA1	chr7	-	43656032	43656153	43648599	43648652	43665657	43665722	6447	29	40	38	44	70	55	96	55	63	24	25	20	270	150	1.74749e-13	1.09968e-10	0.268,0.241,0.277	0.69,0.55,0.636	-0.363	73	120	110	80	93	83
6450	ENSG00000106603	COA1	chr7	-	43656032	43656153	43650611	43650712	43665657	43665722	6450	29	83	46	25	36	32	83	69	84	3	1	3	270	150	0	0	0.392,0.562,0.444	0.939,0.975,0.94	-0.485	54	86	119	70	78	87
6451	ENSG00000106603	COA1	chr7	-	43656032	43656153	43650611	43650712	43729428	43729505	6451	65	128	76	71	104	92	156	139	144	25	38	33	270	150	0	0	0.337,0.406,0.315	0.776,0.67,0.708	-0.365	136	181	232	177	168	177
6452	ENSG00000106603	COA1	chr7	-	43657215	43657269	43648599	43648652	43665657	43665722	6452	15	33	35	44	70	55	30	33	43	24	25	20	203	150	2.42602e-06	0.00031041	0.201,0.258,0.32	0.48,0.494,0.614	-0.27	59	54	103	58	90	63
6454	ENSG00000106603	COA1	chr7	-	43657215	43657269	43650611	43650712	43665657	43665722	6454	14	33	32	25	36	32	30	33	43	3	1	3	203	150	0	0	0.293,0.404,0.425	0.881,0.961,0.914	-0.545	39	33	69	34	64	46
7087	ENSG00000197563	PIGN	chr18	-	62070389	62070506	62052548	62052957	62072672	62072725	7087	0	0	0	5	13	3	1	6	2	8	3	10	266	150	0.000102225	0.00606452	0.0,0.0,0.0	0.066,0.53,0.101	-0.232	5	9	13	9	3	12
7283	ENSG00000221887	HMSD	chr18	+	63953353	63953527	63949300	63949400	63954407	63954557	7283	390	453	346	329	397	413	729	596	668	0	0	0	300	150	0	0	0.372,0.363,0.295	1.0,1.0,1.0	-0.657	719	729	850	596	759	668
7286	ENSG00000221887	HMSD	chr18	+	63968337	63968786	63960181	63960275	63978298	63978476	7286	54	81	55	91	93	65	80	55	39	18	38	27	300	150	0.000521105	0.0210838	0.229,0.303,0.297	0.69,0.42,0.419	-0.233	145	98	174	93	120	66
8511	ENSG00000267360	AC012309.1	chr19	-	37195880	37196027	37190023	37190150	37198938	37199054	8511	2	1	0	23	12	7	4	11	2	9	8	10	296	150	4.10943e-05	0.00298387	0.042,0.041,0.0	0.184,0.411,0.092	-0.201	25	13	13	19	7	12
9550	ENSG00000172785	CBWD1	chr9	-	151304	151427	134978	135030	152033	152078	9550	3	8	3	9	7	7	7	17	13	2	7	6	272	150	0.00142825	0.0443947	0.155,0.387,0.191	0.659,0.573,0.544	-0.348	12	9	15	24	10	19
9806	ENSG00000068885	IFT80	chr3	-	160391545	160391643	160377429	160377540	160399145	160399209	9806	7	11	18	5	4	2	6	6	8	2	0	0	247	150	0.00122197	0.0396454	0.46,0.625,0.845	0.646,1.0,1.0	-0.239	12	8	15	6	20	8
9997	ENSG00000186063	AIDA	chr1	-	222711378	222711545	222703147	222703217	222712207	222712263	9997	14	11	13	369	57	1	8	3	9	0	0	0	300	150	1.03595e-11	4.86638e-09	0.019,0.088,0.867	1.0,1.0,1.0	-0.675	383	8	68	3	14	9
10092	ENSG00000079263	SP140	chr2	+	230243730	230243811	230241403	230241487	230244987	230245071	10092	359	501	441	190	250	243	322	278	389	2	0	0	230	150	0	0	0.552,0.567,0.542	0.991,1.0,1.0	-0.443	549	324	751	278	684	389
10110	ENSG00000079263	SP140	chr2	+	230250980	230251061	230244987	230245071	230255451	230255532	10110	6	12	13	2	2	5	17	13	23	0	0	0	230	150	4.00827e-07	6.89099e-05	0.662,0.796,0.629	1.0,1.0,1.0	-0.304	8	17	14	13	18	23
10367	ENSG00000111832	RWDD1	chr6	+	116572857	116572985	116572421	116572478	116574057	116574171	10367	15	43	34	8	2	12	35	18	38	0	0	2	277	150	2.27725e-06	0.000297073	0.504,0.921,0.605	1.0,1.0,0.911	-0.294	23	35	45	18	46	40
10482	ENSG00000143119	CD53	chr1	+	110896652	110896733	110894326	110894401	110899123	110899922	10482	33	33	49	10	9	3	29	23	36	2	0	0	230	150	3.02058e-06	0.000371179	0.683,0.705,0.914	0.904,1.0,1.0	-0.201	43	31	42	23	52	36
10784	ENSG00000029534	ANK1	chr8	-	41672515	41672912	41672353	41672426	41684543	41684690	10784	8	4	12	14	3	8	6	9	8	1	1	2	300	150	0.000497108	0.0203017	0.222,0.4,0.429	0.75,0.818,0.667	-0.395	22	7	7	10	20	10
11063	ENSG00000229043	AC091729.3	chr7	+	1162684	1162728	1162351	1162543	1163451	1163495	11063	3	4	2	2	5	0	6	4	2	1	0	0	193	150	8.46751e-05	0.00521696	0.538,0.383,1.0	0.823,1.0,1.0	-0.301	5	7	9	4	2	2
11123	ENSG00000223745	CCDC18-AS1	chr1	-	93318167	93318228	93305387	93305470	93324634	93324691	11123	9	12	7	17	29	29	12	11	6	9	7	5	210	150	0.00039186	0.0168929	0.274,0.228,0.147	0.488,0.529,0.462	-0.277	26	21	41	18	36	11
11126	ENSG00000223745	CCDC18-AS1	chr1	-	93318167	93318228	93315148	93315269	93324634	93324691	11126	7	14	13	13	10	15	11	15	6	3	3	1	210	150	0.000164826	0.00880515	0.278,0.5,0.382	0.724,0.781,0.811	-0.385	20	14	24	18	28	7
11259	ENSG00000107263	RAPGEF1	chr9	-	131604930	131605188	131602113	131602149	131619050	131619209	11259	4	3	9	13	26	12	19	18	12	13	5	11	300	150	7.74173e-05	0.00489333	0.133,0.055,0.273	0.422,0.643,0.353	-0.319	17	32	29	23	21	23
11730	ENSG00000104490	NCALD	chr8	-	101887140	101887227	101719251	101719648	101915808	101915858	11730	0	0	0	16	36	36	243	281	250	38	36	41	236	150	0	0	0.0,0.0,0.0	0.803,0.832,0.795	-0.81	16	281	36	317	36	291
11732	ENSG00000104490	NCALD	chr8	-	101887140	101887227	101779923	101779979	101915808	101915858	11732	0	0	0	2	7	29	124	150	169	25	26	26	236	150	0	0	0.0,0.0,0.0	0.759,0.786,0.805	-0.783	2	149	7	176	29	195
11978	ENSG00000099875	MKNK2	chr19	-	2042765	2042870	2041039	2041204	2046185	2046283	11978	10	7	10	2	21	0	2	2	11	0	0	0	254	150	1.98726e-05	0.00167373	0.747,0.164,1.0	1.0,1.0,1.0	-0.363	12	2	28	2	10	11
12087	ENSG00000129317	PUS7L	chr12	-	43755216	43755261	43748449	43748609	43758729	43758759	12087	2	10	1	2	0	3	17	5	9	0	0	0	194	150	0.00144277	0.0447436	0.436,1.0,0.205	1.0,1.0,1.0	-0.453	4	17	10	5	4	9
12352	ENSG00000132581	SDF2	chr17	-	28651485	28651577	28648742	28649137	28655286	28655483	12352	34	28	32	20	12	12	38	28	33	2	2	0	241	150	3.72699e-10	1.35113e-07	0.514,0.592,0.624	0.922,0.897,1.0	-0.363	54	40	40	30	44	33
13005	ENSG00000149091	DGKZ	chr11	+	46366243	46366984	46345436	46345585	46367290	46367399	13005	64	85	71	251	230	177	145	124	141	136	80	87	300	150	0	0	0.113,0.156,0.167	0.348,0.437,0.448	-0.266	315	281	315	204	248	228
13694	ENSG00000204604	ZNF468	chr19	-	52853871	52854107	52849086	52849213	52854257	52854345	13694	22	17	21	94	70	96	56	43	49	27	24	32	300	150	0	0	0.105,0.108,0.099	0.509,0.473,0.434	-0.368	116	83	87	67	117	81
13695	ENSG00000204604	ZNF468	chr19	-	52853871	52854126	52849086	52849213	52854257	52854345	13695	36	36	25	94	70	96	91	59	75	27	24	32	300	150	0	0	0.161,0.205,0.115	0.628,0.551,0.54	-0.413	130	118	106	83	121	107
14028	ENSG00000249773	AC092647.5	chr7	+	55906252	55906379	55887276	55887680	55911615	55912068	14028	8	13	9	7	2	1	16	14	13	0	0	0	276	150	5.27722e-07	8.50279e-05	0.383,0.779,0.83	1.0,1.0,1.0	-0.336	15	16	15	14	10	13
14043	ENSG00000183077	AFMID	chr17	+	78204827	78204900	78202702	78202751	78205439	78205518	14043	24	17	20	15	5	14	41	23	46	1	3	0	222	150	8.28524e-10	2.75414e-07	0.519,0.697,0.491	0.965,0.838,1.0	-0.365	39	42	22	26	34	46
14046	ENSG00000183077	AFMID	chr17	+	78205092	78205190	78202702	78202751	78205439	78205518	14046	7	11	9	15	5	14	15	11	10	1	3	0	247	150	7.0973e-06	0.000743596	0.221,0.572,0.281	0.901,0.69,1.0	-0.506	22	16	16	14	23	10
14098	ENSG00000168214	RBPJ	chr4	+	26362445	26362628	26320786	26320815	26386352	26386391	14098	408	364	296	219	170	189	168	181	220	63	29	44	300	150	8.06159e-06	0.000824764	0.482,0.517,0.439	0.571,0.757,0.714	-0.201	627	231	534	210	485	264
14179	ENSG00000269001	AC092070.2	chr19	+	53200623	53200703	53197110	53197262	53204015	53204055	14179	24	8	11	13	8	4	50	39	60	0	0	0	229	150	6.66134e-16	5.33211e-13	0.547,0.396,0.643	1.0,1.0,1.0	-0.471	37	50	16	39	15	60
14817	ENSG00000264324	AC006030.1	chr2	-	74232468	74232647	74231235	74231308	74233401	74233563	14817	39	34	27	6	8	1	4	12	11	0	0	0	300	150	2.87103e-06	0.000357139	0.765,0.68,0.931	1.0,1.0,1.0	-0.208	45	4	42	12	28	11
15047	ENSG00000215790	SLC35E2A	chr1	-	1744250	1744668	1739235	1739704	1745723	1745919	15047	41	71	57	1	23	18	84	65	73	0	0	0	300	150	2.93386e-11	1.25989e-08	0.953,0.607,0.613	1.0,1.0,1.0	-0.276	42	84	94	65	75	73
15781	ENSG00000155111	CDK19	chr6	-	110773875	110773937	110746125	110746201	110815807	110815958	15781	18	19	14	4	2	6	13	11	5	0	0	0	211	150	9.5392e-07	0.000140945	0.762,0.871,0.624	1.0,1.0,1.0	-0.248	22	13	21	11	20	5
15982	ENSG00000141524	TMC6	chr17	-	78117467	78117644	78113547	78113624	78118970	78119046	15982	21	17	2	4	0	6	28	12	46	0	2	0	300	150	0.000606218	0.0234835	0.724,1.0,0.143	1.0,0.75,1.0	-0.294	25	28	17	14	8	46
16597	ENSG00000163466	ARPC2	chr2	+	218238663	218238850	218228737	218228850	218245419	218245457	16597	18	40	18	44	11	15	31	31	47	3	6	3	300	150	1.53924e-05	0.00137757	0.17,0.645,0.375	0.838,0.721,0.887	-0.419	62	34	51	37	33	50
16850	ENSG00000158555	GDPD5	chr11	-	75479243	75479488	75477618	75477795	75490236	75490320	16850	68	71	25	22	18	14	125	130	87	20	8	7	300	150	2.854e-05	0.00221366	0.607,0.664,0.472	0.758,0.89,0.861	-0.255	90	145	89	138	39	94
16930	ENSG00000174628	IQCK	chr16	+	19763847	19764112	19735352	19735450	19788837	19788922	16930	18	6	11	1	4	1	10	10	8	0	0	0	300	150	0.000704758	0.0261752	0.9,0.429,0.846	1.0,1.0,1.0	-0.275	19	10	10	10	12	8
16942	ENSG00000033170	FUT8	chr14	+	65645959	65646117	65629491	65629606	65646519	65646598	16942	3	13	4	0	5	2	6	4	2	0	0	0	300	150	3.79789e-05	0.00279415	1.0,0.565,0.5	1.0,1.0,1.0	-0.312	3	6	18	4	6	2
16974	ENSG00000108021	FAM208B	chr10	+	5709529	5709663	5692815	5692918	5712822	5712918	16974	6	12	12	2	4	0	20	25	3	0	2	0	283	150	0.00114564	0.0377566	0.614,0.614,1.0	1.0,0.869,1.0	-0.214	8	20	16	27	12	3
17338	ENSG00000171492	LRRC8D	chr1	+	89929807	89929878	89846579	89846658	89933066	89933160	17338	2	1	0	1	3	4	4	6	3	0	1	5	220	150	0.00158585	0.0478302	0.577,0.185,0.0	1.0,0.804,0.29	-0.444	3	4	4	7	4	8
17447	ENSG00000073008	PVR	chr19	+	44658741	44658765	44657761	44657910	44661291	44661323	17447	4	6	2	9	10	2	17	6	15	8	2	2	173	150	0.000313133	0.014313	0.278,0.342,0.464	0.648,0.722,0.867	-0.384	13	25	16	8	4	17
17807	ENSG00000184967	NOC4L	chr12	+	132145558	132145665	132144447	132144605	132150980	132151041	17807	2	3	9	1	4	4	9	12	12	0	3	0	256	150	0.000317374	0.0144649	0.54,0.305,0.569	1.0,0.701,1.0	-0.429	3	9	7	15	13	12
18452	ENSG00000055211	GINM1	chr6	+	149572506	149572603	149566293	149566534	149579833	149579990	18452	12	6	14	3	6	5	9	8	12	0	0	0	246	150	6.92376e-09	1.91903e-06	0.709,0.379,0.631	1.0,1.0,1.0	-0.427	15	9	12	8	19	12
19075	ENSG00000135838	NPL	chr1	+	182825780	182825820	182818540	182818689	182829602	182829679	19075	2	3	0	4	0	6	7	4	2	0	0	2	189	150	0.000589034	0.0230043	0.284,1.0,0.0	1.0,1.0,0.442	-0.386	6	7	3	4	6	4
20292	ENSG00000112290	WASF1	chr6	-	110160634	110160732	110127468	110127629	110179840	110180001	20292	17	4	22	2	3	6	13	7	7	0	2	0	247	150	0.00103397	0.0349719	0.838,0.447,0.69	1.0,0.68,1.0	-0.235	19	13	7	9	28	7
20333	ENSG00000186184	POLR1D	chr13	+	27621336	27621437	27620742	27621140	27648378	27648444	20333	96	59	47	29	22	5	46	39	39	0	0	6	250	150	2.20463e-05	0.00181554	0.665,0.617,0.849	1.0,1.0,0.796	-0.222	125	46	81	39	52	45
21583	ENSG00000196912	ANKRD36B	chr2	-	97576378	97576446	97560831	97560860	97580461	97580568	21583	2	2	3	4	4	3	3	2	9	0	2	0	217	150	5.08933e-05	0.00350463	0.257,0.257,0.409	1.0,0.409,1.0	-0.495	6	3	6	4	6	9
21735	ENSG00000243970	PPIEL	chr1	-	39556133	39556201	39554348	39554392	39556598	39556660	21735	0	0	1	11	11	2	2	6	0	0	1	4	217	150	0.000434679	0.0183127	0.0,0.0,0.257	1.0,0.806,0.0	-0.516	11	2	11	7	3	4
22336	ENSG00000178852	EFCAB13	chr17	+	47361377	47361521	47345015	47345098	47370436	47370508	22336	0	6	4	17	10	11	14	21	15	9	3	9	293	150	4.68349e-06	0.000533731	0.0,0.235,0.157	0.443,0.782,0.46	-0.431	17	23	16	24	15	24
22518	ENSG00000108932	SLC16A6	chr17	-	68285544	68285642	68282996	68283123	68291085	68291182	22518	0	0	4	7	4	0	2	2	2	2	0	0	247	150	0.000162481	0.00870307	0.0,0.0,1.0	0.378,1.0,1.0	-0.459	7	4	4	2	4	2
22663	ENSG00000189190	ZNF600	chr19	-	52781316	52781464	52778825	52778907	52786594	52786724	22663	6	16	6	49	43	37	33	28	39	37	38	36	297	150	1.01685e-08	2.69162e-06	0.058,0.158,0.076	0.311,0.271,0.354	-0.215	55	70	59	66	43	75
23587	ENSG00000026297	RNASET2	chr6	-	166938894	166939008	166929503	166929791	166956096	166956191	23587	28	6	13	23	3	1	32	6	4	0	0	1	263	150	2.89916e-06	0.000359457	0.41,0.533,0.881	1.0,1.0,0.695	-0.29	51	32	9	6	14	5
24337	ENSG00000165480	SKA3	chr13	-	21167987	21168399	21159901	21159987	21176374	21176547	24337	1	4	6	11	12	13	4	4	6	0	0	0	300	150	4.58633e-13	2.68359e-10	0.043,0.143,0.188	1.0,1.0,1.0	-0.875	12	4	16	4	19	6
24339	ENSG00000165480	SKA3	chr13	-	21172338	21172504	21159901	21159987	21176374	21176548	24339	22	37	41	11	12	13	22	31	17	0	0	0	300	150	3.18245e-12	1.66716e-09	0.5,0.607,0.612	1.0,1.0,1.0	-0.427	33	22	49	31	54	17
24355	ENSG00000197256	KANK2	chr19	-	11195555	11195881	11194474	11194590	11197484	11197547	24355	20	28	27	5	7	4	35	48	49	0	0	6	300	150	0.00051528	0.0209158	0.667,0.667,0.771	1.0,1.0,0.803	-0.233	25	35	35	48	31	55
24385	ENSG00000163157	TMOD4	chr1	-	151170518	151170663	151169986	151170103	151170919	151171059	24385	2	0	0	2	7	3	4	5	4	2	4	0	294	150	2.54827e-05	0.00204141	0.338,0.0,0.0	0.505,0.389,1.0	-0.519	4	6	7	9	3	4
24782	ENSG00000162241	SLC25A45	chr11	-	65380533	65380632	65380131	65380234	65381874	65381969	24782	4	20	20	2	6	0	5	3	16	0	0	0	248	150	0.000108144	0.00633151	0.547,0.668,1.0	1.0,1.0,1.0	-0.262	6	5	26	3	20	16
25632	ENSG00000132470	ITGB4	chr17	+	75753764	75753974	75752445	75752577	75754575	75754815	25632	14	2	3	1	2	2	9	3	8	1	0	0	300	150	0.000993104	0.0339484	0.875,0.333,0.429	0.818,1.0,1.0	-0.394	15	10	4	3	5	8
26011	ENSG00000223509	AC135983.2	chr15	-	32526812	32526978	32524470	32524600	32528531	32528701	26011	19	8	31	21	1	0	38	6	22	0	0	0	300	150	4.97921e-05	0.00345017	0.311,0.8,1.0	1.0,1.0,1.0	-0.296	40	38	9	6	31	22
26520	ENSG00000175061	LRRC75A-AS1	chr17	+	16460892	16461245	16441073	16441130	16462832	16462941	26520	6	6	4	4	0	7	2	11	8	0	2	0	300	150	0.000702189	0.0261088	0.429,1.0,0.222	1.0,0.733,1.0	-0.361	10	2	6	13	11	8
26642	ENSG00000183281	PLGLB1	chr2	-	87013004	87013119	87011129	87011206	87016301	87016408	26642	5	18	2	1	6	0	8	14	5	0	0	0	264	150	9.53398e-05	0.00574266	0.74,0.63,1.0	1.0,1.0,1.0	-0.21	6	8	24	14	2	5
26717	ENSG00000162604	TM2D1	chr1	-	61724287	61724425	61709328	61709437	61724919	61725050	26717	0	0	1	2	2	3	6	2	7	4	9	1	287	150	4.35019e-05	0.0031081	0.0,0.0,0.148	0.439,0.104,0.785	-0.393	2	10	2	11	4	8
27189	ENSG00000137434	C6orf52	chr6	-	10686965	10687056	10683186	10683232	10694493	10694609	27189	9	32	15	2	1	4	23	12	21	0	0	0	240	150	0.000459989	0.0191293	0.738,0.952,0.701	1.0,1.0,1.0	-0.203	11	23	33	12	19	21
27921	ENSG00000162433	AK4	chr1	+	65148277	65148552	65147548	65147665	65190709	65190829	27921	178	68	58	26	29	11	401	233	333	4	7	14	300	150	2.94653e-13	1.77603e-10	0.774,0.54,0.725	0.98,0.943,0.922	-0.269	204	405	97	240	69	347
28206	ENSG00000135541	AHI1	chr6	-	135302711	135302817	135300499	135300558	135318518	135318616	28206	13	12	23	38	35	35	16	16	19	14	12	16	255	150	0.000455794	0.0190101	0.168,0.168,0.279	0.402,0.44,0.411	-0.213	51	30	47	28	58	35
29292	ENSG00000245937	LINC01184	chr5	-	128081972	128082194	128076946	128077093	128082969	128083090	29292	23	26	24	4	6	4	31	9	33	2	0	0	300	150	1.51923e-05	0.00136576	0.742,0.684,0.75	0.886,1.0,1.0	-0.237	27	33	32	9	28	33
29377	ENSG00000106686	SPATA6L	chr9	-	4617922	4618110	4605346	4605440	4622407	4622510	29377	0	0	0	5	2	2	4	2	1	2	0	2	300	150	0.000166997	0.00889294	0.0,0.0,0.0	0.5,1.0,0.2	-0.567	5	6	2	2	2	3
29509	ENSG00000091073	DTX2	chr7	+	76477113	76477178	76461719	76461836	76480420	76480695	29509	9	4	3	7	7	1	10	33	36	0	4	8	214	150	0.00102283	0.0347037	0.474,0.286,0.678	1.0,0.853,0.759	-0.391	16	10	11	37	4	44
29539	ENSG00000196756	SNHG17	chr20	-	38422091	38422241	38421005	38421098	38426418	38426503	29539	156	196	206	182	233	243	209	171	240	89	90	77	299	150	2.10609e-13	1.3008e-10	0.301,0.297,0.298	0.541,0.488,0.61	-0.248	338	298	429	261	449	317
29842	ENSG00000196873	CBWD3	chr9	+	68269599	68269722	68268933	68268978	68285988	68286040	29842	12	8	4	4	4	0	4	5	6	0	0	0	272	150	4.70181e-06	0.000534619	0.623,0.524,1.0	1.0,1.0,1.0	-0.284	16	4	12	5	4	6
29930	ENSG00000137992	DBT	chr1	-	100210693	100210771	100206444	100206636	100214816	100214983	29930	80	101	93	41	41	62	164	130	176	0	2	0	227	150	0	0	0.563,0.619,0.498	1.0,0.977,1.0	-0.432	121	164	142	132	155	176
30689	ENSG00000148399	DPH7	chr9	-	137574751	137574846	137565084	137565154	137576079	137576167	30689	3	11	5	2	5	3	5	7	8	0	2	0	244	150	0.000160487	0.00861474	0.48,0.575,0.506	1.0,0.683,1.0	-0.374	5	5	16	9	8	8
31114	ENSG00000278416	PMS2P2	chr7	-	75353289	75353402	75351835	75352021	75353568	75353655	31114	9	5	3	4	7	2	14	10	5	2	1	0	262	150	9.69381e-05	0.00581495	0.563,0.29,0.462	0.8,0.851,1.0	-0.445	13	16	12	11	5	5
31125	ENSG00000222009	BTBD19	chr1	+	44812038	44812098	44810659	44810722	44812995	44813064	31125	18	10	19	9	4	9	2	3	2	1	0	0	209	150	7.85254e-05	0.00493841	0.589,0.642,0.602	0.589,1.0,1.0	-0.252	27	3	14	3	28	2
31777	ENSG00000161149	TUBA3FP	chr22	-	21013041	21013184	21011383	21011590	21013781	21014292	31777	0	0	2	3	6	4	8	2	2	1	0	0	292	150	1.02178e-11	4.82248e-09	0.0,0.0,0.204	0.804,1.0,1.0	-0.867	3	9	6	2	6	2
31856	ENSG00000109861	CTSC	chr11	-	88327928	88328016	88312387	88312554	88328111	88328196	31856	0	0	2	7	9	11	4	5	6	6	12	7	237	150	1.30198e-05	0.00120399	0.0,0.0,0.103	0.297,0.209,0.352	-0.252	7	10	9	17	13	13
32923	ENSG00000053438	NNAT	chr20	+	37522357	37522384	37521240	37521403	37522666	37523474	32923	1	1	1	2	8	3	2	2	1	0	0	2	176	150	6.37073e-05	0.00419366	0.299,0.096,0.221	1.0,1.0,0.299	-0.561	3	2	9	2	4	3
32924	ENSG00000053438	NNAT	chr20	+	37522357	37522433	37521260	37521403	37522666	37523342	32924	2	5	5	2	8	3	3	3	2	0	0	2	225	150	0.000740912	0.0271456	0.4,0.294,0.526	1.0,1.0,0.4	-0.393	4	3	13	3	8	4
33250	ENSG00000247240	UBL7-AS1	chr15	+	74461882	74462031	74461264	74461418	74466035	74466130	33250	17	2	8	2	5	2	29	21	27	2	0	0	298	150	2.14335e-05	0.00177678	0.811,0.168,0.668	0.879,1.0,1.0	-0.411	19	31	7	21	10	27
33437	ENSG00000170049	KCNAB3	chr17	-	7923455	7923544	7921858	7923179	7923710	7923831	33437	34	27	34	10	4	4	10	16	18	0	0	0	238	150	4.2427e-07	7.25661e-05	0.682,0.81,0.843	1.0,1.0,1.0	-0.222	44	10	31	16	38	18
33940	ENSG00000137960	GIPC2	chr1	+	78094951	78095132	78080674	78080860	78119392	78119499	33940	15	10	8	2	2	2	6	8	6	0	0	0	300	150	0.000257924	0.0123954	0.789,0.714,0.667	1.0,1.0,1.0	-0.277	17	6	12	8	10	6
34070	ENSG00000148985	PGAP2	chr11	+	3822908	3822993	3808598	3808651	3823882	3824135	34070	15	21	14	14	19	14	8	28	35	0	0	0	234	150	0	0	0.407,0.415,0.391	1.0,1.0,1.0	-0.596	29	8	40	28	28	35
34079	ENSG00000148985	PGAP2	chr11	+	3823612	3823740	3808593	3808651	3823882	3824135	34079	1	12	4	14	19	14	5	3	7	0	0	0	277	150	6.35603e-13	3.61344e-10	0.037,0.255,0.134	1.0,1.0,1.0	-0.858	15	5	31	3	18	7
34950	ENSG00000213096	ZNF254	chr19	+	24091900	24092015	24087175	24087337	24103746	24103867	34950	4	6	4	3	7	0	12	8	17	0	2	0	264	150	0.000267252	0.0127639	0.431,0.328,1.0	1.0,0.694,1.0	-0.312	7	12	13	10	4	17
34965	ENSG00000186919	ZACN	chr17	+	76081881	76082049	76081544	76081755	76082462	76082666	34965	7	9	5	4	4	0	10	2	2	0	0	0	300	150	3.31884e-06	0.000400339	0.467,0.529,1.0	1.0,1.0,1.0	-0.335	11	10	13	2	5	2
35826	ENSG00000106692	FKTN	chr9	+	105573654	105573746	105558129	105558165	105574944	105575137	35826	24	53	38	22	22	10	58	51	67	7	10	8	241	150	0.000444269	0.0186382	0.404,0.6,0.703	0.838,0.76,0.839	-0.243	46	65	75	61	48	75
36862	ENSG00000167065	DUSP18	chr22	-	30664954	30665121	30663514	30664080	30667461	30667885	36862	9	6	7	97	79	83	30	26	28	37	38	62	300	150	3.88578e-15	2.90149e-12	0.044,0.037,0.04	0.288,0.255,0.184	-0.202	106	67	85	64	90	90
36910	ENSG00000074800	ENO1	chr1	-	8876198	8876302	8874823	8874917	8877975	8878033	36910	12	20	9	11	7	7	15	10	5	0	0	3	253	150	0.00044614	0.0186933	0.393,0.629,0.433	1.0,1.0,0.497	-0.347	23	15	27	10	16	8
37645	ENSG00000102575	ACP5	chr19	-	11578479	11578657	11578023	11578194	11578843	11578923	37645	21	42	56	11	4	0	35	40	36	0	0	0	300	150	7.9303e-06	0.00081391	0.488,0.84,1.0	1.0,1.0,1.0	-0.224	32	35	46	40	56	36
37988	ENSG00000168297	PXK	chr3	+	58423460	58423494	58420535	58420568	58424751	58426019	37988	0	1	0	6	6	2	4	6	4	12	13	9	183	150	4.70687e-05	0.00331425	0.0,0.12,0.0	0.215,0.274,0.267	-0.212	6	16	7	19	2	13
38134	ENSG00000147121	KRBOX4	chrX	+	46471141	46471185	46463197	46463308	46472024	46472526	38134	3	11	3	1	5	4	2	5	7	0	0	0	193	150	4.89603e-08	1.09839e-05	0.7,0.631,0.368	1.0,1.0,1.0	-0.434	4	2	16	5	7	7
40435	ENSG00000169762	TAPT1	chr4	-	16202461	16202580	16191360	16191523	16226258	16226471	40435	23	25	19	2	8	2	32	11	24	0	0	0	268	150	5.98151e-07	9.42507e-05	0.866,0.636,0.842	1.0,1.0,1.0	-0.219	25	32	33	11	21	24
40545	ENSG00000021826	CPS1	chr2	+	210519550	210519670	210477681	210477766	210556718	210556859	40545	1	6	19	2	2	4	11	6	6	0	0	2	269	150	0.00112532	0.0372959	0.218,0.626,0.726	1.0,1.0,0.626	-0.352	3	11	8	6	23	8
40546	ENSG00000021826	CPS1	chr2	+	210519550	210519784	210477681	210477766	210556718	210556859	40546	2	1	9	2	2	4	9	9	4	0	0	2	300	150	0.00016354	0.00875042	0.333,0.2,0.529	1.0,1.0,0.5	-0.479	4	9	3	9	13	6
41406	ENSG00000127419	TMEM175	chr4	+	948115	948154	932479	932540	950420	950518	41406	40	43	27	42	32	43	32	23	46	12	14	8	188	150	0.000403581	0.0172274	0.432,0.517,0.334	0.68,0.567,0.821	-0.262	82	44	75	37	70	54
41517	ENSG00000130413	STK33	chr11	-	8476686	8476751	8474714	8475066	8594082	8594289	41517	8	23	17	15	39	18	11	28	6	0	0	0	214	150	0	0	0.272,0.292,0.398	1.0,1.0,1.0	-0.679	23	11	62	28	35	6
41540	ENSG00000130413	STK33	chr11	-	8580813	8580960	8474647	8475066	8594082	8594289	41540	0	0	3	15	39	18	2	2	2	0	0	0	296	150	8.13238e-13	4.57136e-10	0.0,0.0,0.078	1.0,1.0,1.0	-0.974	15	2	39	2	21	2
41753	ENSG00000141971	MVB12A	chr19	+	17413220	17413305	17406144	17406296	17423497	17423617	41753	11	10	15	8	2	7	9	2	9	0	0	1	234	150	3.72828e-06	0.000439269	0.468,0.762,0.579	1.0,1.0,0.852	-0.348	19	9	12	2	22	10
41758	ENSG00000141971	MVB12A	chr19	+	17420537	17420634	17406076	17406296	17423497	17423617	41758	0	2	0	8	2	7	6	9	2	0	0	1	246	150	4.99956e-12	2.55225e-09	0.0,0.379,0.0	1.0,1.0,0.549	-0.723	8	6	4	9	7	3
42059	ENSG00000110768	GTF2H1	chr11	+	18325946	18326153	18324235	18324296	18333059	18333183	42059	23	6	26	24	32	25	16	19	21	12	3	4	300	150	0.000523745	0.0211412	0.324,0.086,0.342	0.4,0.76,0.724	-0.377	47	28	38	22	51	25
42196	ENSG00000071462	BUD23	chr7	+	73686819	73686900	73686635	73686731	73692595	73692646	42196	0	5	7	5	5	5	7	13	11	0	0	6	230	150	0.000473069	0.0195433	0.0,0.395,0.477	1.0,1.0,0.545	-0.558	5	7	10	13	12	17
42736	ENSG00000152795	HNRNPDL	chr4	-	82428017	82428179	82427189	82427304	82429247	82429397	42736	14	7	9	4	6	7	3	7	7	0	0	0	300	150	1.62387e-09	5.0934e-07	0.636,0.368,0.391	1.0,1.0,1.0	-0.535	18	3	13	7	16	7
43295	ENSG00000198794	SCAMP5	chr15	+	75007587	75007728	74995555	74995673	75011791	75011846	43295	14	22	25	62	93	99	76	114	92	27	31	56	290	150	0	0	0.105,0.109,0.116	0.593,0.655,0.459	-0.459	76	103	115	145	124	148
43297	ENSG00000198794	SCAMP5	chr15	+	75007660	75007728	74995572	74995673	75011791	75011846	43297	16	20	21	62	93	99	37	75	58	27	31	56	217	150	1.31006e-14	9.43029e-12	0.151,0.129,0.128	0.486,0.626,0.417	-0.374	78	64	113	106	120	114
43386	ENSG00000106100	NOD1	chr7	-	30463608	30463698	30459900	30460041	30478605	30478742	43386	25	32	24	48	40	46	53	50	80	29	22	29	239	150	6.21465e-10	2.12952e-07	0.246,0.334,0.247	0.534,0.588,0.634	-0.31	73	82	72	72	70	109
43691	ENSG00000160323	ADAMTS13	chr9	+	133443375	133443561	133442613	133442743	133444862	133445052	43691	24	24	7	3	1	3	18	5	10	0	0	0	300	150	0.000201281	0.0102963	0.8,0.923,0.538	1.0,1.0,1.0	-0.246	27	18	25	5	10	10
44211	ENSG00000285505	AC010616.2	chr19	-	41978605	41978798	41978150	41978326	41981501	41981636	44211	14	20	12	3	2	4	28	22	16	2	0	0	300	150	0.000134693	0.00750263	0.7,0.833,0.6	0.875,1.0,1.0	-0.247	17	30	22	22	16	16
44243	ENSG00000158458	NRG2	chr5	-	139871043	139871148	139869398	139869718	139871720	139871803	44243	15	8	8	10	0	1	3	6	3	0	0	0	254	150	2.56367e-05	0.00204883	0.47,1.0,0.825	1.0,1.0,1.0	-0.235	25	3	8	6	9	3
44556	ENSG00000180229	HERC2P3	chr15	-	20476924	20477056	20466194	20466370	20483402	20483517	44556	0	3	1	6	8	4	2	7	6	1	7	2	281	150	0.000401037	0.0171628	0.0,0.167,0.118	0.516,0.348,0.616	-0.398	6	3	11	14	5	8
44558	ENSG00000180229	HERC2P3	chr15	-	20483402	20483517	20466194	20466370	20505390	20505462	44558	17	10	5	6	5	1	4	10	2	0	0	0	264	150	2.72677e-08	6.496e-06	0.617,0.532,0.74	1.0,1.0,1.0	-0.37	23	4	15	10	6	2
45280	ENSG00000185513	L3MBTL1	chr20	+	43530797	43530889	43530283	43530419	43532772	43532924	45280	6	20	0	7	7	2	4	5	8	0	1	1	241	150	6.18857e-05	0.00409557	0.348,0.64,0.0	1.0,0.757,0.833	-0.534	13	4	27	6	2	9
45608	ENSG00000136895	GARNL3	chr9	+	127363948	127364033	127357218	127357377	127364588	127364776	45608	0	0	0	3	4	7	2	2	6	2	5	3	234	150	3.42587e-07	6.02429e-05	0.0,0.0,0.0	0.391,0.204,0.562	-0.386	3	4	4	7	7	9
45746	ENSG00000100083	GGA1	chr22	+	37613023	37613191	37608844	37608903	37614193	37614274	45746	0	2	0	2	4	4	7	6	2	0	1	0	300	150	7.46747e-12	3.62705e-09	0.0,0.2,0.0	1.0,0.75,1.0	-0.85	2	7	6	7	4	2
45817	ENSG00000226777	FAM30A	chr14	+	105922540	105922643	105922198	105922344	105923014	105923122	45817	97	74	62	101	68	60	178	186	264	94	81	84	252	150	8.56897e-08	1.80883e-05	0.364,0.393,0.381	0.53,0.577,0.652	-0.207	198	272	142	267	122	348
45818	ENSG00000226777	FAM30A	chr14	+	105922540	105922643	105922198	105922344	105924335	105932642	45818	84	54	50	176	209	156	142	143	197	130	114	155	252	150	0	0	0.221,0.133,0.16	0.394,0.427,0.431	-0.246	260	272	263	257	206	352
46076	ENSG00000166169	POLL	chr10	-	101585315	101585478	101583507	101583681	101587245	101587382	46076	2	8	9	0	10	1	2	6	3	0	0	0	300	150	7.578e-05	0.00482643	1.0,0.286,0.818	1.0,1.0,1.0	-0.299	2	2	18	6	10	3
46529	ENSG00000077157	PPP1R12B	chr1	+	202558876	202558893	202496780	202496822	202562777	202562922	46529	18	12	5	0	5	3	18	15	3	1	0	0	166	150	0.000253317	0.012215	1.0,0.684,0.601	0.942,1.0,1.0	-0.219	18	19	17	15	8	3
47239	ENSG00000213593	TMX2	chr11	+	57738663	57738770	57737607	57737668	57739130	57739212	47239	1	0	4	2	9	6	8	4	8	4	3	2	256	150	0.000269122	0.0128056	0.227,0.0,0.281	0.54,0.439,0.701	-0.391	3	12	9	7	10	10
48410	ENSG00000161249	DMKN	chr19	-	35507457	35507511	35506125	35506185	35509910	35509961	48410	0	0	0	3	5	3	4	11	0	15	0	11	203	150	0.000346217	0.015387	0.0,0.0,0.0	0.165,1.0,0.0	-0.388	3	19	5	11	3	11
48838	ENSG00000112237	CCNC	chr6	-	99549311	99549399	99545111	99545230	99549507	99549575	48838	3	4	2	1	2	2	12	5	3	0	0	1	237	150	0.000421228	0.0178588	0.655,0.559,0.388	1.0,1.0,0.655	-0.351	4	12	6	5	4	4
49216	ENSG00000162910	MRPL55	chr1	-	228108954	228109016	228107667	228107869	228109148	228109312	49216	0	0	0	7	6	12	2	5	2	0	10	12	211	150	0.00051627	0.020939	0.0,0.0,0.0	1.0,0.262,0.106	-0.456	7	2	6	15	12	14
49340	ENSG00000138658	ZGRF1	chr4	-	112629758	112630015	112620112	112620190	112631929	112632010	49340	0	1	0	4	5	13	6	6	3	6	0	1	300	150	6.25969e-08	1.35846e-05	0.0,0.091,0.0	0.333,1.0,0.6	-0.614	4	12	6	6	13	4
49382	ENSG00000204120	GIGYF2	chr2	+	232722553	232722658	232703423	232703489	232724573	232724691	49382	21	27	24	53	70	39	40	32	54	21	25	54	254	150	5.31623e-06	0.000589065	0.19,0.186,0.267	0.529,0.43,0.371	-0.229	74	61	97	57	63	108
49387	ENSG00000204120	GIGYF2	chr2	+	232724573	232724691	232697330	232697392	232734416	232734486	49387	11	16	22	4	5	8	17	9	12	0	0	0	267	150	7.43475e-09	2.02697e-06	0.607,0.643,0.607	1.0,1.0,1.0	-0.381	15	17	21	9	30	12
50022	ENSG00000175662	TOM1L2	chr17	-	17884633	17884768	17879626	17879743	17898595	17898674	50022	2	5	11	1	2	3	4	2	5	0	0	1	284	150	0.000243003	0.0118317	0.514,0.569,0.659	1.0,1.0,0.725	-0.328	3	4	7	2	14	6
50733	ENSG00000119522	DENND1A	chr9	-	123452275	123452347	123440359	123440491	123557569	123557695	50733	3	21	20	5	7	0	4	8	13	0	0	0	221	150	1.60023e-05	0.00141819	0.289,0.671,1.0	1.0,1.0,1.0	-0.347	8	4	28	8	20	13
50801	ENSG00000184007	PTP4A2	chr1	-	31930932	31931142	31918999	31919658	31942528	31942576	50801	11	12	8	14	20	17	19	17	31	9	16	9	300	150	0.00127382	0.0407594	0.282,0.231,0.19	0.514,0.347,0.633	-0.264	25	28	32	33	25	40
52160	ENSG00000168385	45171	chr2	+	241324408	241324662	241315945	241315982	241325992	241326113	52160	3	4	0	30	33	2	9	2	21	13	8	0	300	150	0.000427698	0.0180979	0.048,0.057,0.0	0.257,0.111,1.0	-0.421	33	22	37	10	2	21
52240	ENSG00000197302	ZNF720	chr16	+	31759356	31759466	31753765	31753900	31792629	31792730	52240	29	29	22	4	9	9	21	24	22	2	0	2	259	150	0.000367033	0.0160648	0.808,0.651,0.586	0.859,1.0,0.864	-0.226	33	23	38	24	31	24
53498	ENSG00000244754	N4BP2L2	chr13	-	32446358	32446480	32442387	32444126	32477886	32478048	53498	4	2	6	2	6	7	6	4	6	2	1	0	271	150	0.000811131	0.029111	0.525,0.156,0.322	0.624,0.689,1.0	-0.437	6	8	8	5	13	6
53825	ENSG00000229180	AC006001.3	chr7	-	66588511	66588580	66584102	66584466	66592256	66592386	53825	6	6	3	26	36	39	29	25	24	26	40	49	218	150	6.56743e-07	0.000102196	0.137,0.103,0.05	0.434,0.301,0.252	-0.232	32	55	42	65	42	73
54020	ENSG00000171811	CFAP46	chr10	-	132912654	132912820	132909918	132910068	132913045	132913258	54020	8	4	2	1	5	0	10	3	2	0	0	0	300	150	0.00102616	0.0347696	0.8,0.286,1.0	1.0,1.0,1.0	-0.305	9	10	9	3	2	2
54447	ENSG00000151498	ACAD8	chr11	+	134257087	134257257	134253547	134253709	134259007	134259084	54447	2	2	0	13	8	11	2	8	8	2	6	9	300	150	1.46456e-05	0.00132495	0.071,0.111,0.0	0.333,0.4,0.308	-0.286	15	4	10	14	11	17
55699	ENSG00000143493	INTS7	chr1	-	211968512	211968707	211952426	211952701	211976581	211976719	55699	11	6	5	3	2	2	5	8	3	0	0	0	300	150	5.69035e-06	0.000620455	0.647,0.6,0.556	1.0,1.0,1.0	-0.399	14	5	8	8	7	3
55990	ENSG00000140563	MCTP2	chr15	+	94440175	94440298	94401899	94402019	94458136	94458246	55990	24	21	43	5	16	2	2	4	4	0	0	0	272	150	2.06913e-06	0.000272768	0.726,0.42,0.922	1.0,1.0,1.0	-0.311	29	2	37	4	45	4
56007	ENSG00000168393	DTYMK	chr2	-	241681918	241682333	241678451	241678649	241686653	241686742	56007	3	6	14	4	3	0	10	6	14	0	0	0	300	150	1.85018e-05	0.00158632	0.273,0.5,1.0	1.0,1.0,1.0	-0.409	7	10	9	6	14	14
56348	ENSG00000153898	MCOLN2	chr1	-	84971935	84972034	84965548	84965708	84997007	84997112	56348	156	200	167	133	91	111	89	62	76	20	23	16	248	150	3.43729e-05	0.00257621	0.415,0.571,0.476	0.729,0.62,0.742	-0.21	289	109	291	85	278	92
56431	ENSG00000163071	SPATA18	chr4	+	52062219	52062332	52060781	52060897	52071916	52072156	56431	101	62	34	24	5	20	16	4	13	0	1	0	262	150	1.20741e-05	0.00113755	0.707,0.877,0.493	1.0,0.696,1.0	-0.206	125	16	67	5	54	13
56482	ENSG00000241489	AC244197.3	chrX	-	149526935	149527068	149500948	149501037	149529366	149529428	56482	12	4	2	1	1	3	6	15	6	0	0	0	282	150	0.00159519	0.0479887	0.865,0.68,0.262	1.0,1.0,1.0	-0.398	13	6	5	15	5	6
56696	ENSG00000167720	SRR	chr17	+	2309776	2309990	2303382	2303477	2315556	2315728	56696	2	2	1	4	4	4	3	4	6	0	0	0	300	150	3.98237e-13	2.35778e-10	0.2,0.2,0.111	1.0,1.0,1.0	-0.83	6	3	6	4	5	6
56924	ENSG00000205583	STAG3L1	chr7	+	75365563	75365643	75365254	75365353	75366323	75366438	56924	11	26	9	3	7	1	44	28	62	0	2	0	229	150	1.93592e-06	0.000257583	0.706,0.709,0.855	1.0,0.902,1.0	-0.211	14	44	33	30	10	62
57789	ENSG00000151575	TEX9	chr15	+	56389317	56389400	56373440	56373504	56394164	56394247	57789	0	0	1	6	2	9	14	8	9	12	11	13	232	150	1.38733e-07	2.793e-05	0.0,0.0,0.067	0.43,0.32,0.309	-0.331	6	26	2	19	10	22
58946	ENSG00000003096	KLHL13	chrX	-	117983479	117983545	117945433	117945575	118028423	118028495	58946	4	1	3	5	8	15	7	7	2	4	0	2	215	150	0.000851799	0.0301267	0.358,0.08,0.122	0.55,1.0,0.411	-0.467	9	11	9	7	18	4
59846	ENSG00000196411	EPHB4	chr7	-	100805165	100805321	100802564	100803590	100805500	100805694	59846	27	13	12	6	0	9	10	17	18	0	0	0	300	150	1.26807e-06	0.000178955	0.692,1.0,0.4	1.0,1.0,1.0	-0.303	33	10	13	17	21	18
59928	ENSG00000285417	BX571818.1	chr1	+	206041565	206041690	206035252	206035299	206051852	206052001	59928	116	159	164	4	79	99	18	11	13	0	0	0	274	150	9.13265e-08	1.92044e-05	0.941,0.524,0.476	1.0,1.0,1.0	-0.353	120	18	238	11	263	13
60132	ENSG00000106615	RHEB	chr7	-	151498088	151498180	151490942	151491014	151519031	151519183	60132	13	2	0	4	3	2	16	16	6	0	0	0	241	150	1.47546e-08	3.74696e-06	0.669,0.293,0.0	1.0,1.0,1.0	-0.679	17	16	5	16	2	6
60180	ENSG00000115307	AUP1	chr2	-	74528750	74528935	74527939	74528006	74529361	74529499	60180	3	0	2	5	6	0	9	8	2	0	1	1	300	150	6.88748e-05	0.00447204	0.231,0.0,1.0	1.0,0.8,0.5	-0.356	8	9	6	9	2	3
60470	ENSG00000241549	GUSBP2	chr6	-	26951085	26951159	26925119	26925275	26956388	26956554	60470	1	1	0	4	10	11	6	2	5	5	13	5	223	150	7.62509e-05	0.00485024	0.144,0.063,0.0	0.447,0.094,0.402	-0.245	5	11	11	15	11	10
60521	ENSG00000178927	CYBC1	chr17	-	82447579	82447621	82445863	82445960	82449173	82449292	60521	6	22	13	2	2	10	12	13	22	1	0	0	191	150	4.23169e-06	0.000489705	0.702,0.896,0.505	0.904,1.0,1.0	-0.267	8	13	24	13	23	22
60962	ENSG00000259583	AC015712.2	chr15	-	100917887	100918213	100915656	100915980	100918803	100918841	60962	0	5	3	6	10	5	8	7	12	2	3	6	300	150	0.0001585	0.0085333	0.0,0.2,0.231	0.667,0.538,0.5	-0.425	6	10	15	10	8	18
61489	ENSG00000241962	AC079447.1	chr2	+	99206633	99206757	99195572	99195756	99215997	99216114	61489	13	22	9	3	13	0	13	19	15	0	0	0	273	150	8.71599e-07	0.000130358	0.704,0.482,1.0	1.0,1.0,1.0	-0.271	16	13	35	19	9	15
62039	ENSG00000111859	NEDD9	chr6	-	11334500	11334561	11328524	11328875	11382138	11382299	62039	2	10	22	4	0	3	9	5	2	0	0	0	210	150	0.000837467	0.029746	0.263,1.0,0.84	1.0,1.0,1.0	-0.299	6	9	10	5	25	2
62113	ENSG00000185015	CA13	chr8	+	85224954	85225295	85220926	85221125	85230084	85230200	62113	25	17	15	0	6	4	14	12	7	0	0	0	300	150	5.91078e-06	0.000637301	1.0,0.586,0.652	1.0,1.0,1.0	-0.254	25	14	23	12	19	7
62330	ENSG00000162390	ACOT11	chr1	+	54592545	54592606	54585834	54585904	54593940	54594039	62330	9	7	2	1	2	3	7	5	8	0	0	2	210	150	0.000480192	0.0197236	0.865,0.714,0.323	1.0,1.0,0.741	-0.28	10	7	9	5	5	10
62493	ENSG00000080503	SMARCA2	chr9	+	2159813	2159909	2158448	2158594	2161685	2161903	62493	16	53	40	13	6	18	30	31	29	0	1	4	245	150	7.29061e-05	0.00466716	0.43,0.844,0.576	1.0,0.95,0.816	-0.305	29	30	59	32	58	33
62626	ENSG00000187741	FANCA	chr16	-	89762637	89762793	89761948	89762022	89764806	89764947	62626	1	3	0	3	1	2	42	54	50	2	4	1	300	150	6.04167e-06	0.000650712	0.143,0.6,0.0	0.913,0.871,0.962	-0.668	4	44	4	58	2	51
63149	ENSG00000167460	TPM4	chr19	+	16081019	16081075	16077956	16078149	16081912	16082046	63149	6	4	3	3	7	2	7	11	11	0	0	0	205	150	1.992e-10	7.60739e-08	0.594,0.295,0.523	1.0,1.0,1.0	-0.529	9	7	11	11	5	11
63227	ENSG00000141376	BCAS3	chr17	+	61388617	61388708	61368326	61368494	61391976	61392273	63227	26	15	33	36	51	52	23	22	24	18	13	23	240	150	0.00121253	0.0394158	0.311,0.155,0.284	0.444,0.514,0.395	-0.201	62	41	66	35	85	47
63322	ENSG00000180198	RCC1	chr1	+	28508829	28508901	28506056	28506084	28516724	28516867	63322	5	1	2	1	2	2	13	9	8	0	0	2	221	150	0.000878928	0.0308897	0.772,0.253,0.404	1.0,1.0,0.731	-0.434	6	13	3	9	4	10
63696	ENSG00000197619	ZNF615	chr19	-	52003696	52003900	52002154	52002281	52007292	52007330	63696	21	16	29	9	8	8	68	44	51	1	0	0	300	150	2.10942e-14	1.4969e-11	0.538,0.5,0.644	0.971,1.0,1.0	-0.43	30	69	24	44	37	51
63697	ENSG00000197619	ZNF615	chr19	-	52003696	52003900	52002154	52002281	52008140	52008163	63697	22	17	36	27	42	12	59	45	64	7	1	6	300	150	1.07504e-08	2.82325e-06	0.289,0.168,0.6	0.808,0.957,0.842	-0.517	49	66	59	46	48	70
64189	ENSG00000054277	OPN3	chr1	-	241600379	241600653	241597762	241597997	241604419	241604579	64189	0	4	2	4	3	4	16	8	8	0	4	3	300	150	0.000614054	0.0236788	0.0,0.4,0.2	1.0,0.5,0.571	-0.49	4	16	7	12	6	11
64290	ENSG00000267364	AC022706.1	chr17	+	35321734	35321865	35313501	35313706	35323147	35323278	64290	2	6	0	7	5	7	2	2	3	0	0	0	280	150	1.63425e-12	8.83881e-10	0.133,0.391,0.0	1.0,1.0,1.0	-0.825	9	2	11	2	7	3
64994	ENSG00000226824	AC006001.2	chr7	+	66667397	66667610	66654550	66654626	66668763	66668913	64994	0	2	2	10	18	20	6	7	10	3	11	8	300	150	2.34215e-07	4.34784e-05	0.0,0.053,0.048	0.5,0.241,0.385	-0.342	10	9	20	18	22	18
65108	ENSG00000249859	PVT1	chr8	+	128070159	128070361	128010317	128010444	128096517	128096656	65108	56	57	7	32	36	26	80	68	68	0	0	24	300	150	8.10764e-08	1.7187e-05	0.467,0.442,0.119	1.0,1.0,0.586	-0.519	88	80	93	68	33	92
65389	ENSG00000167785	ZNF558	chr19	-	8830769	8830891	8825001	8825108	8831317	8831401	65389	32	25	46	50	46	40	36	30	27	14	18	12	271	150	8.08443e-05	0.00504934	0.262,0.231,0.389	0.587,0.48,0.555	-0.247	82	50	71	48	86	39
65516	ENSG00000110651	CD81	chr11	+	2386554	2386639	2384662	2384682	2390411	2390526	65516	12	10	16	19	27	34	41	41	24	45	26	12	234	150	0.000264825	0.0126682	0.288,0.192,0.232	0.369,0.503,0.562	-0.241	31	86	37	67	50	36
65517	ENSG00000110651	CD81	chr11	+	2386554	2386639	2385665	2385806	2390411	2390526	65517	12	8	16	2	0	13	39	39	27	3	0	0	234	150	0.000301163	0.0139121	0.794,1.0,0.441	0.893,1.0,1.0	-0.219	14	42	8	39	29	27
65722	ENSG00000179406	LINC00174	chr7	-	66439134	66439304	66429883	66430017	66450070	66450236	65722	34	41	27	8	11	11	32	18	27	1	2	1	300	150	1.9076e-05	0.00162409	0.68,0.651,0.551	0.941,0.818,0.931	-0.269	42	33	52	20	38	28
66307	ENSG00000175003	SLC22A1	chr6	+	160155974	160156074	160154797	160154910	160158515	160158551	66307	12	5	6	2	0	4	4	2	3	0	0	0	249	150	0.000679864	0.0255254	0.783,1.0,0.475	1.0,1.0,1.0	-0.247	14	4	5	2	10	3
67007	ENSG00000165923	AGBL2	chr11	-	47667570	47667696	47663025	47663112	47668840	47668907	67007	7	13	6	3	5	4	3	3	2	0	0	1	275	150	8.31496e-05	0.00514833	0.56,0.586,0.45	1.0,1.0,0.522	-0.309	10	3	18	3	10	3
67013	ENSG00000165923	AGBL2	chr11	-	47685892	47686049	47681968	47682095	47690075	47690858	67013	4	9	11	16	13	14	4	5	3	2	0	1	300	150	0.00168076	0.0497629	0.111,0.257,0.282	0.5,1.0,0.6	-0.483	20	6	22	5	25	4
67551	ENSG00000095637	SORBS1	chr10	-	95351208	95351376	95346405	95346452	95354881	95354967	67551	22	13	16	2	7	3	6	8	10	0	0	1	300	150	4.96131e-05	0.00344493	0.846,0.481,0.727	1.0,1.0,0.833	-0.26	24	6	20	8	19	11
67552	ENSG00000095637	SORBS1	chr10	-	95351215	95351376	95346405	95346452	95354881	95354967	67552	12	3	8	2	7	3	4	4	7	0	0	1	300	150	1.40079e-05	0.00127999	0.75,0.176,0.571	1.0,1.0,0.778	-0.427	14	4	10	4	11	8
68086	ENSG00000283549	AC007161.3	chr7	+	7641503	7641705	7640751	7640821	7673308	7673453	68086	8	25	4	67	53	44	9	11	7	0	5	0	300	150	6.98544e-09	1.93078e-06	0.056,0.191,0.043	1.0,0.524,1.0	-0.745	75	9	78	16	48	7
68092	ENSG00000167182	SP2	chr17	+	47897814	47897927	47896181	47896293	47914725	47914861	68092	6	6	6	4	5	4	14	6	2	1	0	0	262	150	1.75441e-07	3.40196e-05	0.462,0.407,0.462	0.889,1.0,1.0	-0.519	10	15	11	6	10	2
68225	ENSG00000149273	RPS3	chr11	+	75402351	75402446	75399485	75399577	75404671	75404730	68225	1	2	0	3	4	5	14	12	10	22	9	11	244	150	0.000954852	0.032922	0.17,0.235,0.0	0.281,0.45,0.359	-0.228	4	36	6	21	5	21
68311	ENSG00000219626	FAM228B	chr2	+	24137908	24138100	24135118	24135187	24139369	24139450	68311	10	8	7	21	5	11	6	8	28	3	3	2	300	150	0.000441225	0.0185494	0.192,0.444,0.241	0.5,0.571,0.875	-0.356	31	9	13	11	18	30
68351	ENSG00000255339	AL133352.1	chr10	-	100516873	100516960	100509315	100509511	100526398	100526554	68351	1	22	8	37	32	0	14	10	4	0	0	0	236	150	3.66185e-08	8.52078e-06	0.017,0.304,1.0	1.0,1.0,1.0	-0.56	38	14	54	10	8	4
68388	ENSG00000100099	HPS4	chr22	-	26471212	26471388	26470718	26470922	26472301	26472418	68388	3	15	6	16	30	15	22	20	15	9	10	8	300	150	2.32063e-07	4.32374e-05	0.086,0.2,0.167	0.55,0.5,0.484	-0.36	19	31	45	30	21	23
68689	ENSG00000188002	AC026412.1	chr5	-	1632643	1632751	1630408	1630566	1632844	1632906	68689	6	0	12	32	49	29	24	11	16	20	17	11	257	150	1.81069e-07	3.49753e-05	0.099,0.0,0.195	0.412,0.274,0.459	-0.284	38	44	49	28	41	27
70057	ENSG00000254505	CHMP4A	chr14	-	24211679	24211829	24210653	24210768	24213023	24213085	70057	11	0	7	5	6	1	9	7	6	0	0	0	299	150	1.22603e-08	3.17806e-06	0.525,0.0,0.778	1.0,1.0,1.0	-0.566	16	9	6	7	8	6
70619	ENSG00000183889	AC138969.1	chr16	+	16317895	16318079	16317443	16317777	16318922	16318975	70619	0	7	8	7	2	0	5	4	3	0	0	1	300	150	0.000201065	0.0102905	0.0,0.636,1.0	1.0,1.0,0.6	-0.321	7	5	9	4	8	4
70783	ENSG00000126882	FAM78A	chr9	-	131264583	131264627	131258075	131261350	131270459	131270523	70783	0	0	0	7	10	6	3	4	1	22	2	9	193	150	0.000478202	0.0196654	0.0,0.0,0.0	0.096,0.609,0.079	-0.261	7	25	10	6	6	10
71018	ENSG00000078304	PPP2R5C	chr14	+	101818991	101819085	101762904	101762970	101856685	101856885	71018	3	15	12	0	8	5	9	6	3	0	0	0	243	150	4.93037e-07	8.14056e-05	1.0,0.536,0.597	1.0,1.0,1.0	-0.289	3	9	23	6	17	3
71094	ENSG00000214078	CPNE1	chr20	-	35658929	35658982	35632794	35632923	35664358	35664900	71094	18	27	21	9	10	24	17	26	22	0	0	0	202	150	2.94431e-13	1.77603e-10	0.598,0.667,0.394	1.0,1.0,1.0	-0.447	27	17	37	26	45	22
71100	ENSG00000214078	CPNE1	chr20	-	35658929	35659014	35632794	35632923	35664358	35664900	71100	43	42	41	9	10	24	19	33	27	0	0	0	234	150	2.48679e-11	1.07715e-08	0.754,0.729,0.523	1.0,1.0,1.0	-0.331	52	19	52	33	65	27
71328	ENSG00000284697	AC006511.5	chr12	+	8125560	8125677	8120907	8121106	8129263	8129362	71328	4	12	6	2	2	4	7	20	11	0	0	2	266	150	0.000120944	0.00690321	0.53,0.772,0.458	1.0,1.0,0.756	-0.332	6	7	14	20	10	13
71652	ENSG00000131759	RARA	chr17	+	40326474	40326551	40309191	40309286	40330856	40331396	71652	9	25	1	10	11	7	19	5	4	1	0	0	226	150	7.40163e-09	2.02346e-06	0.374,0.601,0.087	0.927,1.0,1.0	-0.622	19	20	36	5	8	4
72047	ENSG00000226025	LGALS17A	chr19	+	39684709	39684807	39683486	39683763	39685301	39685418	72047	0	6	4	3	7	3	5	3	4	0	0	0	247	150	1.69932e-11	7.69361e-09	0.0,0.342,0.447	1.0,1.0,1.0	-0.737	3	5	13	3	7	4
72400	ENSG00000104529	EEF1D	chr8	-	143590644	143590735	143589893	143590081	143593892	143594071	72400	11	5	12	2	5	0	11	14	7	0	0	0	240	150	0.000202612	0.0103538	0.775,0.385,1.0	1.0,1.0,1.0	-0.28	13	11	10	14	12	7
72402	ENSG00000104529	EEF1D	chr8	-	143590644	143590738	143589643	143590081	143593892	143594071	72402	11	7	12	2	5	0	9	14	8	0	0	0	243	150	0.000166489	0.00887975	0.772,0.464,1.0	1.0,1.0,1.0	-0.255	13	9	12	14	12	8
72410	ENSG00000104529	EEF1D	chr8	-	143592646	143592893	143589837	143590081	143593892	143594071	72410	13	15	23	2	5	0	33	25	28	0	0	0	300	150	0.000231001	0.0114124	0.765,0.6,1.0	1.0,1.0,1.0	-0.212	15	33	20	25	23	28
72519	ENSG00000156265	MAP3K7CL	chr21	+	29133305	29133414	29092438	29092581	29149188	29149250	72519	46	60	48	28	31	25	59	64	89	2	5	4	258	150	0	0	0.489,0.529,0.527	0.945,0.882,0.928	-0.403	74	61	91	69	73	93
73343	ENSG00000242086	MUC20-OT1	chr3	+	195685817	195685939	195683749	195683865	195688532	195688797	73343	8	7	3	79	124	89	15	30	16	25	36	49	271	150	8.08242e-14	5.39135e-11	0.053,0.03,0.018	0.249,0.316,0.153	-0.206	87	40	131	66	92	65
73351	ENSG00000242086	MUC20-OT1	chr3	+	195689338	195689438	195688366	195688797	195696360	195696425	73351	37	24	27	4	9	6	51	24	26	0	2	1	249	150	8.69897e-06	0.000874767	0.848,0.616,0.731	1.0,0.878,0.94	-0.208	41	51	33	26	33	27
73471	ENSG00000267106	ZNF561-AS1	chr19	+	9626783	9626860	9621290	9621350	9632227	9632372	73471	33	37	43	4	15	15	29	25	25	0	0	2	226	150	7.3437e-08	1.57342e-05	0.846,0.621,0.655	1.0,1.0,0.892	-0.257	37	29	52	25	58	27
73745	ENSG00000196967	ZNF585A	chr19	-	37108286	37108385	37106733	37107695	37109389	37109855	73745	16	12	12	10	3	2	16	5	7	0	0	0	248	150	4.0461e-08	9.24294e-06	0.492,0.708,0.784	1.0,1.0,1.0	-0.339	26	16	15	5	14	7
73839	ENSG00000165171	METTL27	chr7	-	73840413	73840549	73840030	73840120	73841069	73841198	73839	26	8	10	5	2	3	11	5	5	0	0	0	285	150	1.54738e-06	0.000212725	0.732,0.678,0.637	1.0,1.0,1.0	-0.318	31	11	10	5	13	5
74231	ENSG00000215424	MCM3AP-AS1	chr21	+	46236223	46236326	46230326	46230527	46240833	46242999	74231	18	0	8	67	68	62	9	13	16	0	0	35	252	150	1.18185e-06	0.000168212	0.138,0.0,0.071	1.0,1.0,0.214	-0.668	85	9	68	13	70	51
74433	ENSG00000158985	CDC42SE2	chr5	+	131354650	131354769	131264061	131264166	131359208	131359382	74433	9	1	5	18	27	15	5	4	5	0	0	16	268	150	0.00143089	0.0444353	0.219,0.02,0.157	1.0,1.0,0.149	-0.584	27	5	28	4	20	21
75833	ENSG00000204536	CCHCR1	chr6	-	31157384	31157500	31157022	31157089	31158166	31158189	75833	4	0	4	80	118	76	29	24	34	39	99	56	265	150	0	0	0.028,0.0,0.029	0.296,0.121,0.256	-0.205	84	68	118	123	80	90
75834	ENSG00000204536	CCHCR1	chr6	-	31157384	31157500	31157022	31157155	31158166	31158189	75834	4	0	4	6	9	8	7	5	6	1	0	2	265	150	1.39751e-06	0.00019475	0.274,0.0,0.221	0.798,1.0,0.629	-0.644	10	8	9	5	12	8
75838	ENSG00000101353	MROH8	chr20	-	37129031	37129167	37123608	37123799	37141161	37141314	75838	1	9	4	1	4	1	7	7	6	2	0	0	285	150	0.00167651	0.0496585	0.345,0.542,0.678	0.648,1.0,1.0	-0.361	2	9	13	7	5	6
76053	ENSG00000133318	RTN3	chr11	+	63718701	63721032	63704850	63704907	63749990	63750198	76053	10	15	15	1	2	3	16	8	4	0	0	0	300	150	0.000478384	0.0196654	0.833,0.789,0.714	1.0,1.0,1.0	-0.221	11	16	17	8	18	4
76098	ENSG00000160685	ZBTB7B	chr1	+	155010915	155011015	155002629	155002943	155014014	155014093	76098	2	1	4	13	25	29	6	8	4	4	9	17	249	150	0.000338352	0.0151678	0.085,0.024,0.077	0.475,0.349,0.124	-0.254	15	10	26	17	33	21
76923	ENSG00000162736	NCSTN	chr1	+	160351695	160351805	160350104	160350250	160352886	160352991	76923	3	5	0	20	7	5	16	7	4	8	5	6	259	150	0.000767892	0.0278987	0.08,0.293,0.0	0.537,0.448,0.279	-0.297	23	24	12	12	5	10
77078	ENSG00000245060	LINC00847	chr5	+	180832672	180832860	180831758	180831941	180834311	180835726	77078	2	3	2	12	8	6	4	13	13	4	11	9	300	150	0.000279439	0.0131514	0.077,0.158,0.143	0.333,0.371,0.419	-0.248	14	8	11	24	8	22
77134	ENSG00000280828	AC090114.3	chr7	+	128577963	128578033	128574719	128574791	128578889	128578933	77134	20	29	22	22	43	17	39	38	33	4	0	1	219	150	0	0	0.384,0.316,0.47	0.87,1.0,0.958	-0.553	42	43	72	38	39	34
77290	ENSG00000119979	FAM45A	chr10	+	119105310	119105495	119104763	119105022	119107947	119108096	77290	3	2	0	5	7	4	12	15	10	6	1	5	300	150	2.82383e-05	0.00219936	0.231,0.125,0.0	0.5,0.882,0.5	-0.509	8	18	9	16	4	15
77291	ENSG00000119979	FAM45A	chr10	+	119105310	119105495	119104763	119105022	119107967	119108164	77291	0	3	0	2	8	5	4	10	6	8	4	6	300	150	0.00026067	0.0125033	0.0,0.158,0.0	0.2,0.556,0.333	-0.31	2	12	11	14	5	12
77847	ENSG00000111711	GOLT1B	chr12	+	21507943	21508109	21507116	21507151	21508382	21508561	77847	11	13	11	7	8	3	8	7	16	3	0	0	300	150	0.00067186	0.025339	0.44,0.448,0.647	0.571,1.0,1.0	-0.345	18	11	21	7	14	16
77947	ENSG00000132676	DAP3	chr1	+	155709032	155709125	155687984	155688192	155709772	155709824	77947	29	35	36	25	25	22	42	27	46	7	4	15	242	150	3.1678e-05	0.00241402	0.418,0.465,0.504	0.788,0.807,0.655	-0.288	54	49	60	31	58	61
78043	ENSG00000116977	LGALS8	chr1	+	236542914	236543040	236542760	236542787	236543559	236543648	78043	312	277	243	273	272	279	297	294	276	88	81	89	275	150	0	0	0.384,0.357,0.322	0.648,0.664,0.628	-0.292	585	385	549	375	522	365
78079	ENSG00000143401	ANP32E	chr1	-	150230570	150230693	150229071	150229144	150235732	150236064	78079	25	28	19	6	4	8	25	30	26	0	0	1	272	150	4.85348e-08	1.09375e-05	0.697,0.794,0.567	1.0,1.0,0.935	-0.292	31	25	32	30	27	27
78111	ENSG00000234127	TRIM26	chr6	-	30201034	30201138	30198665	30199264	30213304	30213427	78111	47	72	50	17	0	17	49	35	64	0	0	0	253	150	1.40029e-08	3.5742e-06	0.621,1.0,0.636	1.0,1.0,1.0	-0.248	64	49	72	35	67	64
78186	ENSG00000159322	ADPGK	chr15	-	72774871	72775097	72760406	72760527	72783301	72783730	78186	12	14	8	2	6	0	5	6	11	0	0	0	300	150	1.72281e-05	0.00150287	0.75,0.538,1.0	1.0,1.0,1.0	-0.237	14	5	20	6	8	11
78372	ENSG00000198908	BHLHB9	chrX	+	102747816	102747911	102720956	102721027	102748698	102748881	78372	11	6	5	1	8	1	20	8	8	0	0	1	244	150	3.10247e-05	0.00237327	0.871,0.316,0.755	1.0,1.0,0.831	-0.296	12	20	14	8	6	9
78375	ENSG00000198908	BHLHB9	chrX	+	102747832	102747911	102720956	102721027	102748698	102748735	78375	7	5	4	1	8	1	14	5	6	0	0	1	228	150	1.99589e-05	0.00167818	0.822,0.291,0.725	1.0,1.0,0.798	-0.32	8	14	13	5	5	7
78694	ENSG00000118564	FBXL5	chr4	-	15656228	15656342	15644492	15644708	15659726	15659922	78694	10	11	7	3	4	2	12	3	9	0	0	1	263	150	2.15327e-05	0.00178352	0.655,0.611,0.666	1.0,1.0,0.837	-0.302	13	12	15	3	9	10
78730	ENSG00000238035	AC138035.1	chr5	+	181316289	181316497	181315836	181315953	181317330	181317395	78730	19	17	23	2	0	12	17	15	27	0	0	0	300	150	7.44558e-06	0.000774409	0.826,1.0,0.489	1.0,1.0,1.0	-0.228	21	17	17	15	35	27
78836	ENSG00000170175	CHRNB1	chr17	+	7448578	7448788	7447042	7447650	7454296	7454520	78836	23	10	21	7	5	0	8	2	2	0	0	0	300	150	3.47148e-06	0.000412525	0.622,0.5,1.0	1.0,1.0,1.0	-0.293	30	8	15	2	21	2
79061	ENSG00000170919	TPT1-AS1	chr13	+	45379898	45380001	45379194	45379335	45383090	45383235	79061	2	0	5	9	19	0	10	8	7	0	2	0	252	150	8.80459e-06	0.000883612	0.117,0.0,1.0	1.0,0.704,1.0	-0.529	11	10	19	10	5	7
79064	ENSG00000170919	TPT1-AS1	chr13	+	45379925	45380001	45379194	45379335	45383090	45383235	79064	7	3	18	9	19	0	15	33	10	0	2	0	225	150	1.57314e-05	0.00139666	0.341,0.095,1.0	1.0,0.917,1.0	-0.494	16	15	22	35	18	10
79580	ENSG00000205352	PRR13	chr12	+	53442694	53442733	53441604	53441792	53443678	53443773	79580	57	26	12	0	5	13	48	44	76	0	0	0	188	150	2.31569e-06	0.000300131	1.0,0.806,0.424	1.0,1.0,1.0	-0.257	57	48	31	44	25	76
79977	ENSG00000228784	LINC00954	chr2	+	19869074	19869156	19868890	19868952	19869495	19869613	79977	0	0	0	9	6	9	6	2	4	14	5	10	231	150	2.78488e-06	0.00034962	0.0,0.0,0.0	0.218,0.206,0.206	-0.21	9	20	6	7	9	14
80267	ENSG00000104714	ERICH1	chr8	-	625674	627238	614745	615284	668597	668792	80267	5	2	9	11	8	22	4	2	2	1	1	0	300	150	0.000109624	0.00639573	0.185,0.111,0.17	0.667,0.5,1.0	-0.567	16	5	10	3	31	2
80378	ENSG00000253320	AZIN1-AS1	chr8	+	102937623	102937757	102930181	102930518	102941920	102942053	80378	45	42	33	9	8	2	11	2	11	0	0	0	283	150	3.22726e-06	0.000391881	0.726,0.736,0.897	1.0,1.0,1.0	-0.214	54	11	50	2	35	11
80644	ENSG00000117054	ACADM	chr1	+	75728388	75728488	75724779	75724817	75732643	75732741	80644	1083	1259	1064	252	264	203	1468	1355	1474	51	52	41	249	150	0	0	0.721,0.742,0.759	0.945,0.94,0.956	-0.206	1335	1519	1523	1407	1267	1515
80828	ENSG00000175224	ATG13	chr11	+	46621059	46621157	46618324	46618375	46629906	46630028	80828	3	8	3	2	4	2	3	6	4	1	0	0	247	150	1.94227e-05	0.00164414	0.477,0.548,0.477	0.646,1.0,1.0	-0.381	5	4	12	6	5	4
81197	ENSG00000100401	RANGAP1	chr22	-	41284900	41285153	41280932	41281082	41285362	41285905	81197	12	43	42	7	17	11	52	54	64	3	7	7	300	150	0.000130294	0.00730765	0.462,0.558,0.656	0.897,0.794,0.821	-0.279	19	55	60	61	53	71
81323	ENSG00000280987	MATR3	chr5	+	139293452	139293575	139279050	139279129	139314674	139314736	81323	18	22	16	14	15	17	25	22	14	3	0	1	272	150	1.46478e-09	4.63804e-07	0.415,0.447,0.342	0.821,1.0,0.885	-0.501	32	28	37	22	33	15
82117	ENSG00000173402	DAG1	chr3	+	49476848	49476905	49470964	49471049	49510418	49510794	82117	4	0	2	0	3	2	7	4	4	0	0	0	206	150	0.000289924	0.013524	1.0,0.0,0.421	1.0,1.0,1.0	-0.526	4	7	3	4	4	4
82343	ENSG00000121716	PILRB	chr7	+	100353894	100354012	100353372	100353483	100356749	100356883	82343	13	20	20	4	4	0	16	18	9	0	0	0	267	150	3.70763e-05	0.00273984	0.646,0.737,1.0	1.0,1.0,1.0	-0.206	17	16	24	18	20	9
82460	ENSG00000132541	RIDA	chr8	-	98113637	98113825	98108645	98108713	98117031	98117114	82460	7	12	8	12	4	4	13	21	9	2	0	2	300	150	0.000232477	0.0114642	0.226,0.6,0.5	0.765,1.0,0.692	-0.377	19	15	16	21	12	11
82708	ENSG00000149100	EIF3M	chr11	+	32588593	32588732	32583797	32583929	32593865	32593949	82708	9	5	8	11	15	10	19	13	24	6	5	1	288	150	1.36009e-05	0.0012485	0.299,0.148,0.294	0.623,0.575,0.926	-0.461	20	25	20	18	18	25
83069	ENSG00000228486	C2orf92	chr2	+	97694446	97694599	97675844	97675928	97699025	97699048	83069	3	0	0	0	2	7	3	4	4	2	0	0	300	150	3.25566e-05	0.00247156	1.0,0.0,0.0	0.429,1.0,1.0	-0.476	3	5	2	4	7	4
83070	ENSG00000228486	C2orf92	chr2	+	97694446	97694599	97690255	97690327	97699025	97699048	83070	4	0	0	22	17	15	3	6	4	14	2	7	300	150	0.000335423	0.015077	0.083,0.0,0.0	0.097,0.6,0.222	-0.279	26	17	17	8	15	11
83404	ENSG00000108946	PRKAR1A	chr17	+	68514986	68515119	68512899	68512970	68515393	68515536	83404	46	57	38	54	54	33	47	56	62	35	15	23	282	150	0.00162833	0.0486636	0.312,0.36,0.38	0.417,0.665,0.589	-0.206	100	82	111	71	71	85
83764	ENSG00000147687	TATDN1	chr8	-	124503839	124503951	124495471	124495542	124504274	124504347	83764	16	39	21	15	11	0	29	14	32	0	0	3	261	150	0.000377839	0.0164443	0.38,0.671,1.0	1.0,1.0,0.86	-0.27	31	29	50	14	21	35
83920	ENSG00000134779	TPGS2	chr18	-	36781798	36781922	36780023	36780188	36798448	36798609	83920	0	0	0	11	16	22	71	58	64	30	21	21	273	150	0	0	0.0,0.0,0.0	0.565,0.603,0.626	-0.598	11	101	16	79	22	85
84261	ENSG00000102897	LYRM1	chr16	+	20902485	20902717	20900449	20900535	20911182	20911264	84261	17	29	37	3	6	10	19	20	32	1	0	2	300	150	5.30975e-05	0.00362895	0.739,0.707,0.649	0.905,1.0,0.889	-0.233	20	20	35	20	47	34
84515	ENSG00000174516	PELI3	chr11	+	66468832	66468904	66468127	66468280	66471241	66471371	84515	37	10	17	2	1	11	27	37	38	0	0	1	221	150	6.68589e-06	0.000709407	0.926,0.872,0.512	1.0,1.0,0.963	-0.218	39	27	11	37	28	39
85840	ENSG00000213753	CENPBD1P1	chr19	+	58586154	58586356	58575444	58575588	58591497	58591624	85840	44	39	27	14	14	20	54	40	37	0	0	2	300	150	7.89369e-14	5.3008e-11	0.611,0.582,0.403	1.0,1.0,0.902	-0.435	58	54	53	40	47	39
86706	ENSG00000185158	LRRC37B	chr17	+	32017971	32018054	32007987	32008132	32020696	32020803	86706	10	4	12	10	6	13	17	18	29	6	7	5	232	150	0.000303866	0.0139862	0.393,0.301,0.374	0.647,0.624,0.789	-0.331	20	23	10	25	25	34
86930	ENSG00000278390	AL354696.2	chr13	+	41146426	41146507	41132938	41133055	41162262	41162403	86930	56	29	43	22	9	7	14	34	24	0	0	3	230	150	2.33777e-06	0.00030221	0.624,0.678,0.8	1.0,1.0,0.839	-0.246	78	14	38	34	50	27
87009	ENSG00000198399	ITSN2	chr2	-	24206243	24206275	24205213	24205297	24209099	24209221	87009	1	2	4	3	2	1	8	2	3	0	0	0	181	150	1.36408e-05	0.00125048	0.216,0.453,0.768	1.0,1.0,1.0	-0.521	4	8	4	2	5	3
87091	ENSG00000105341	DMAC2	chr19	-	41436428	41436472	41433536	41433673	41438234	41438414	87091	4	4	6	1	3	3	3	10	2	0	1	0	193	150	1.29519e-05	0.00119882	0.757,0.509,0.609	1.0,0.886,1.0	-0.337	5	3	7	11	9	2
87200	ENSG00000162148	PPP1R32	chr11	+	61486523	61486610	61485798	61485911	61486947	61487061	87200	6	2	2	4	3	0	6	4	3	2	0	0	236	150	0.00160834	0.0482522	0.488,0.298,1.0	0.656,1.0,1.0	-0.29	10	8	5	4	2	3
87490	ENSG00000164830	OXR1	chr8	+	106737519	106737600	106726106	106726309	106739457	106739583	87490	81	88	60	40	45	38	55	29	38	6	13	0	230	150	0.000397974	0.0170681	0.569,0.561,0.507	0.857,0.593,1.0	-0.271	121	61	133	42	98	38
87562	ENSG00000151164	RAD9B	chr12	+	110503805	110503876	110501654	110501730	110505616	110505772	87562	3	2	10	2	0	5	3	5	14	0	0	0	220	150	5.392e-05	0.00367058	0.506,1.0,0.577	1.0,1.0,1.0	-0.306	5	3	2	5	15	14
87572	ENSG00000126934	MAP2K2	chr19	-	4097278	4097343	4090320	4090708	4101018	4101047	87572	8	1	3	2	1	4	3	4	4	0	0	0	214	150	1.54775e-06	0.000212725	0.737,0.412,0.345	1.0,1.0,1.0	-0.502	10	3	2	4	7	4
88034	ENSG00000123352	SPATS2	chr12	+	49441729	49441816	49367383	49367587	49454224	49454385	88034	9	11	8	4	0	3	5	7	8	0	0	0	236	150	7.13346e-05	0.00458121	0.588,1.0,0.629	1.0,1.0,1.0	-0.261	13	5	11	7	11	8
88040	ENSG00000123352	SPATS2	chr12	+	49441729	49441816	49406472	49406565	49460769	49461028	88040	16	15	14	26	17	15	14	14	13	12	0	1	236	150	0.000689905	0.0257863	0.281,0.359,0.372	0.426,1.0,0.892	-0.435	42	26	32	14	29	14
88104	ENSG00000176473	WDR25	chr14	+	100380909	100381746	100376438	100376495	100468020	100468168	88104	77	102	70	20	16	12	82	60	87	5	2	0	300	150	4.32178e-08	9.83495e-06	0.658,0.761,0.745	0.891,0.938,1.0	-0.222	97	87	118	62	82	87
88940	ENSG00000117281	CD160	chr1	+	145730743	145731070	145728243	145728400	145735996	145736134	88940	12	0	5	4	4	4	3	4	5	0	0	0	300	150	2.12906e-10	8.03876e-08	0.6,0.0,0.385	1.0,1.0,1.0	-0.672	16	3	4	4	9	5
89307	ENSG00000130589	HELZ2	chr20	-	63561822	63561984	63561349	63561466	63562287	63562382	89307	9	0	2	0	2	3	2	2	6	0	0	1	300	150	0.000193591	0.00998333	1.0,0.0,0.25	1.0,1.0,0.75	-0.5	9	2	2	2	5	7
89503	ENSG00000068903	SIRT2	chr19	-	38898378	38898425	38893818	38893971	38899505	38899711	89503	34	46	39	34	6	22	41	27	36	3	0	3	196	150	4.6239e-06	0.000528143	0.434,0.854,0.576	0.913,1.0,0.902	-0.317	68	44	52	27	61	39
89819	ENSG00000184619	KRBA2	chr17	-	8371308	8372081	8368709	8370386	8375899	8376658	89819	14	12	13	19	24	23	17	19	13	0	9	6	300	150	0.000277376	0.0130789	0.269,0.2,0.22	1.0,0.514,0.52	-0.448	33	17	36	28	36	19
90070	ENSG00000203666	EFCAB2	chr1	+	245002120	245002232	244969981	244970443	245059385	245059458	90070	17	11	29	0	9	13	13	7	11	0	0	0	261	150	5.40171e-07	8.65036e-05	1.0,0.413,0.562	1.0,1.0,1.0	-0.342	17	13	20	7	42	11
90122	ENSG00000179088	C12orf42	chr12	-	103305973	103306345	103301942	103302559	103368886	103368998	90122	8	3	2	10	2	6	6	6	4	4	0	0	300	150	0.00150953	0.046246	0.286,0.429,0.143	0.429,1.0,1.0	-0.524	18	10	5	6	8	4
91280	ENSG00000181666	HKR1	chr19	+	37344933	37345021	37335168	37335257	37346422	37346675	91280	0	2	0	16	10	14	5	0	6	3	10	13	237	150	0.000418436	0.0177706	0.0,0.112,0.0	0.513,0.0,0.226	-0.209	16	8	12	10	14	19
91572	ENSG00000110888	CAPRIN2	chr12	-	30753343	30753559	30751070	30751133	30754688	30754860	91572	22	27	22	4	0	6	22	14	20	0	0	0	300	150	8.46178e-06	0.000856077	0.733,1.0,0.647	1.0,1.0,1.0	-0.207	26	22	27	14	28	20
91694	ENSG00000132958	TPTE2	chr13	-	19424946	19425017	19422876	19423164	19426424	19426517	91694	19	17	6	4	4	3	7	5	11	0	0	0	220	150	6.52054e-07	0.000101647	0.764,0.743,0.577	1.0,1.0,1.0	-0.305	23	7	21	5	9	11
92078	ENSG00000148737	TCF7L2	chr10	+	113089399	113089540	113040024	113040126	113141183	113141316	92078	0	4	0	9	7	5	1	2	2	1	1	0	290	150	0.000269148	0.0128056	0.0,0.228,0.0	0.341,0.508,1.0	-0.54	9	2	11	3	5	2
92282	ENSG00000120899	PTK2B	chr8	+	27312303	27312387	27311481	27311709	27313204	27313287	92282	38	52	41	5	12	9	28	34	46	0	0	0	233	150	4.44114e-10	1.58702e-07	0.83,0.736,0.746	1.0,1.0,1.0	-0.229	43	28	64	34	50	46
92344	ENSG00000077327	SPAG6	chr10	+	22387822	22387996	22386753	22386959	22389159	22389312	92344	8	8	22	8	7	3	6	3	5	0	0	0	300	150	1.49732e-08	3.79285e-06	0.333,0.364,0.786	1.0,1.0,1.0	-0.506	16	6	15	3	25	5
92898	ENSG00000188690	UROS	chr10	-	125794021	125794388	125789282	125789363	125794879	125794978	92898	13	81	19	82	107	118	85	74	96	74	66	72	300	150	3.53014e-09	1.03564e-06	0.073,0.275,0.075	0.365,0.359,0.4	-0.234	95	159	188	140	137	168
93043	ENSG00000205643	CDPF1	chr22	-	46247105	46247221	46244050	46245238	46248171	46248285	93043	20	35	23	14	9	10	51	26	42	2	0	0	265	150	4.64773e-12	2.3971e-09	0.447,0.688,0.566	0.935,1.0,1.0	-0.411	34	53	44	26	33	42
93044	ENSG00000205643	CDPF1	chr22	-	46247109	46247221	46244012	46245238	46248171	46248284	93044	28	98	79	14	9	10	98	75	78	2	0	0	261	150	8.85993e-10	2.92573e-07	0.535,0.862,0.82	0.966,1.0,1.0	-0.25	42	100	107	75	89	78
93046	ENSG00000205643	CDPF1	chr22	-	46247124	46247221	46244010	46245238	46248171	46248285	93046	18	27	22	14	9	10	40	21	37	2	0	0	246	150	6.2873e-12	3.14544e-09	0.439,0.647,0.573	0.924,1.0,1.0	-0.422	32	42	36	21	32	37
94066	ENSG00000250312	ZNF718	chr4	+	130787	130914	124479	124673	201080	201211	94066	14	22	12	18	5	8	42	28	44	0	0	0	276	150	8.23785e-14	5.42273e-11	0.297,0.705,0.449	1.0,1.0,1.0	-0.516	32	42	27	28	20	44
94307	ENSG00000272556	GTF2IP13	chr7	+	45797042	45797140	45795074	45795198	45797477	45797674	94307	1	1	0	3	3	4	1	10	14	4	4	7	247	150	6.09843e-05	0.00404904	0.168,0.168,0.0	0.132,0.603,0.548	-0.316	4	5	4	14	4	21
94314	ENSG00000175137	SH3BP5L	chr1	-	248820402	248820912	248816821	248816884	248821146	248821261	94314	12	5	8	1	4	2	8	10	15	2	0	0	300	150	0.000865888	0.0305064	0.857,0.385,0.667	0.667,1.0,1.0	-0.253	13	10	9	10	10	15
94514	ENSG00000276550	HERC2P2	chr15	+	22587343	22587391	22579583	22579723	22589942	22590815	94514	9	30	56	14	5	0	14	140	9	0	0	1	197	150	3.42189e-05	0.00257045	0.329,0.82,1.0	1.0,1.0,0.873	-0.241	23	14	35	140	56	10
94846	ENSG00000003400	CASP10	chr2	+	201203729	201203766	201195841	201195948	201208074	201208160	94846	1	2	3	8	8	5	17	7	5	5	0	10	186	150	0.00111	0.0369847	0.092,0.168,0.326	0.733,1.0,0.287	-0.478	9	22	10	7	8	15
94895	ENSG00000133466	C1QTNF6	chr22	-	37191671	37191737	37190864	37190928	37195380	37195458	94895	13	9	4	9	4	6	11	5	16	0	0	0	215	150	1.95149e-10	7.48124e-08	0.502,0.611,0.317	1.0,1.0,1.0	-0.523	22	11	13	5	10	16
95557	ENSG00000260565	ERVK13-1	chr16	-	2671023	2671231	2669410	2669561	2671344	2671461	95557	11	4	8	1	1	8	8	12	4	0	0	0	300	150	5.01558e-07	8.21349e-05	0.846,0.667,0.333	1.0,1.0,1.0	-0.385	12	8	5	12	16	4
95779	ENSG00000263753	LINC00667	chr18	+	5240186	5241812	5238083	5239049	5243593	5243936	95779	7	18	10	1	0	6	13	16	9	0	0	0	300	150	0.000324361	0.0147253	0.778,1.0,0.455	1.0,1.0,1.0	-0.256	8	13	18	16	16	9
95879	ENSG00000156398	SFXN2	chr10	+	102715222	102715328	102714635	102714681	102717702	102717780	95879	8	6	7	3	7	5	2	4	6	0	2	0	255	150	0.000452244	0.0188834	0.611,0.335,0.452	1.0,0.541,1.0	-0.381	11	2	13	6	12	6
95885	ENSG00000156398	SFXN2	chr10	+	102716613	102716711	102714537	102714681	102717702	102717780	95885	6	11	17	3	7	5	10	5	4	0	2	0	247	150	0.000373792	0.0163107	0.548,0.488,0.674	1.0,0.603,1.0	-0.298	9	10	18	7	22	4
97565	ENSG00000102904	TSNAXIP1	chr16	+	67821098	67821225	67814301	67814401	67824582	67824779	97565	2	0	0	10	6	2	4	1	6	0	3	0	276	150	8.58238e-07	0.000128745	0.098,0.0,0.0	1.0,0.153,1.0	-0.685	12	4	6	4	2	6
97818	ENSG00000166851	PLK1	chr16	+	23682063	23682157	23677655	23680252	23687468	23687624	97818	3	2	3	3	0	3	2	5	8	0	0	0	243	150	4.18669e-05	0.00302898	0.382,1.0,0.382	1.0,1.0,1.0	-0.412	6	2	2	5	6	8
98118	ENSG00000135951	TSGA10	chr2	-	99035229	99035439	99020279	99020482	99064938	99065124	98118	23	12	5	0	3	4	11	6	5	0	0	0	300	150	8.04513e-05	0.00503737	1.0,0.667,0.385	1.0,1.0,1.0	-0.316	23	11	15	6	9	5
98517	ENSG00000168477	TNXB	chr6	-	32064820	32065117	32062156	32062483	32067660	32067984	98517	1	4	0	4	3	5	4	7	6	1	2	1	300	150	0.000118912	0.00681445	0.111,0.4,0.0	0.667,0.636,0.75	-0.514	5	5	7	9	5	7
98601	ENSG00000151490	PTPRO	chr12	+	15560192	15560276	15557454	15557523	15565592	15565628	98601	25	6	9	2	7	3	7	3	2	0	0	0	233	150	7.02284e-07	0.000107774	0.889,0.356,0.659	1.0,1.0,1.0	-0.365	27	7	13	3	12	2
98791	ENSG00000152439	ZNF773	chr19	+	57508519	57508564	57505301	57505400	57513021	57513151	98791	1	1	0	2	2	6	2	2	3	2	0	0	194	150	3.28053e-07	5.83019e-05	0.279,0.279,0.0	0.436,1.0,1.0	-0.626	3	4	3	2	6	3
98954	ENSG00000135297	MTO1	chr6	+	73480996	73481116	73480674	73480805	73482448	73482620	98954	7	4	0	6	0	3	5	5	13	0	0	2	269	150	0.000380414	0.0165348	0.394,1.0,0.0	1.0,1.0,0.784	-0.463	13	5	4	5	3	15
99119	ENSG00000255468	AP001107.9	chr11	+	66349334	66349470	66347949	66348070	66353454	66353619	99119	2	0	1	6	3	4	5	3	4	2	3	4	285	150	0.000680143	0.0255263	0.149,0.0,0.116	0.568,0.345,0.345	-0.331	8	7	3	6	5	8
99942	ENSG00000250999	AC136604.3	chr5	+	179662974	179663103	179658235	179658481	179664322	179664432	99942	11	10	7	0	3	7	15	10	12	0	2	0	278	150	0.000828176	0.0295313	1.0,0.643,0.35	1.0,0.73,1.0	-0.246	11	15	13	12	14	12
100988	ENSG00000164024	METAP1	chr4	+	99037766	99037941	99036042	99036089	99039373	99039465	100988	0	0	1	5	2	1	4	8	0	0	2	2	300	150	0.000256952	0.0123605	0.0,0.0,0.333	1.0,0.667,0.0	-0.445	5	4	2	10	2	2
101851	ENSG00000152601	MBNL1	chr3	+	152396166	152396224	152335110	152335230	152414940	152415111	101851	0	1	0	7	11	26	8	3	2	44	0	22	207	150	0.00137875	0.0431509	0.0,0.062,0.0	0.116,1.0,0.062	-0.372	7	52	12	3	26	24
101864	ENSG00000152601	MBNL1	chr3	+	152447619	152447773	152268039	152269092	152459270	152459302	101864	4	10	7	5	0	1	16	12	4	0	0	0	300	150	0.00135765	0.0427446	0.286,1.0,0.778	1.0,1.0,1.0	-0.312	9	16	10	12	8	4
102683	ENSG00000115211	EIF2B4	chr2	-	27368024	27368113	27367456	27367559	27368371	27368463	102683	9	10	2	3	0	4	6	5	5	0	0	0	238	150	7.65297e-05	0.0048618	0.654,1.0,0.24	1.0,1.0,1.0	-0.369	12	6	10	5	6	5
102710	ENSG00000214176	PLEKHM1P1	chr17	-	64782481	64782619	64781433	64781616	64785221	64785367	102710	5	2	0	0	2	3	4	4	2	0	1	0	287	150	0.000175008	0.0092154	1.0,0.343,0.0	1.0,0.676,1.0	-0.444	5	4	4	5	3	2
102714	ENSG00000214176	PLEKHM1P1	chr17	-	64814862	64815245	64804829	64805100	64821766	64822052	102714	3	6	4	46	55	43	69	59	57	23	28	31	300	150	0	0	0.032,0.052,0.044	0.6,0.513,0.479	-0.488	49	92	61	87	47	88
103151	ENSG00000187510	PLEKHG7	chr12	+	92707649	92707672	92706470	92707138	92728992	92729120	103151	2	11	7	8	3	0	12	5	7	1	0	0	172	150	0.000234734	0.0115178	0.179,0.762,1.0	0.913,1.0,1.0	-0.324	10	13	14	5	7	7
103258	ENSG00000126091	ST3GAL3	chr1	+	43900748	43900833	43899540	43899727	43919931	43920217	103258	2	6	10	1	4	2	4	4	3	0	1	0	234	150	0.000181701	0.00947394	0.562,0.49,0.762	1.0,0.719,1.0	-0.302	3	4	10	5	12	3
103438	ENSG00000165948	IFI27L1	chr14	+	94094749	94094899	94088247	94088303	94096855	94096965	103438	5	9	4	9	9	6	15	6	5	3	1	0	299	150	3.12007e-05	0.00238491	0.218,0.334,0.251	0.715,0.751,1.0	-0.554	14	18	18	7	10	5
103439	ENSG00000165948	IFI27L1	chr14	+	94094749	94094899	94088247	94088303	94096886	94096965	103439	8	13	3	30	30	30	19	14	14	20	11	22	299	150	0.000156552	0.00845971	0.118,0.179,0.048	0.323,0.39,0.242	-0.203	38	39	43	25	33	36
103897	ENSG00000102547	CAB39L	chr13	-	49401132	49401270	49382506	49382941	49401394	49401587	103897	11	8	13	4	8	6	4	2	3	0	0	0	287	150	1.29584e-08	3.31606e-06	0.59,0.343,0.531	1.0,1.0,1.0	-0.512	15	4	16	2	19	3
105212	ENSG00000112855	HARS2	chr5	+	140693934	140694054	140691608	140691756	140695737	140695845	105212	6	2	3	3	4	3	15	3	6	0	1	0	269	150	4.57711e-07	7.65839e-05	0.527,0.218,0.358	1.0,0.626,1.0	-0.508	9	15	6	4	6	6
105681	ENSG00000026508	CD44	chr11	+	35201670	35201787	35198120	35198246	35204511	35204640	105681	56	3	48	12	15	0	32	14	15	0	0	2	266	150	0.000546716	0.0217853	0.725,0.101,1.0	1.0,1.0,0.809	-0.328	68	32	18	14	48	17
105711	ENSG00000026508	CD44	chr11	+	35208104	35208206	35189834	35189972	35211245	35211253	105711	4	6	6	4	5	0	2	2	7	1	0	0	251	150	0.000170119	0.00903003	0.374,0.418,1.0	0.544,1.0,1.0	-0.251	8	3	11	2	6	7
106300	ENSG00000078403	MLLT10	chr10	+	21557620	21557824	21538832	21538912	21571974	21572026	106300	9	22	20	6	7	6	9	15	23	1	0	1	300	150	1.89104e-06	0.000252957	0.429,0.611,0.625	0.818,1.0,0.92	-0.358	15	10	29	15	26	24
106407	ENSG00000136819	C9orf78	chr9	-	129834711	129834766	129833657	129833709	129835138	129835254	106407	368	395	398	121	109	127	618	565	573	10	10	17	204	150	0	0	0.691,0.727,0.697	0.978,0.976,0.961	-0.267	489	628	504	575	525	590
106526	ENSG00000117090	SLAMF1	chr1	-	160623502	160623585	160612487	160612580	160624095	160624185	106526	41	23	20	106	86	67	62	41	43	48	47	43	232	150	6.63938e-10	2.26729e-07	0.2,0.147,0.162	0.455,0.361,0.393	-0.233	147	110	109	88	87	86
106561	ENSG00000155621	C9orf85	chr9	+	71918424	71918555	71911640	71911836	71941804	71941934	106561	5	15	7	0	8	4	5	5	2	0	0	0	280	150	8.34893e-07	0.000125619	1.0,0.501,0.484	1.0,1.0,1.0	-0.338	5	5	23	5	11	2
107145	ENSG00000204138	PHACTR4	chr1	+	28457831	28457855	28438150	28438430	28459084	28459258	107145	5	10	12	14	33	20	8	11	12	0	10	0	173	150	8.5973e-06	0.000866284	0.236,0.208,0.342	1.0,0.488,1.0	-0.567	19	8	43	21	32	12
107184	ENSG00000196233	LCOR	chr10	+	96954952	96955834	96952102	96952196	96958411	96958926	107184	21	65	38	6	7	5	33	31	28	2	0	0	300	150	1.24607e-05	0.00116522	0.636,0.823,0.792	0.892,1.0,1.0	-0.214	27	35	72	31	43	28
109182	ENSG00000187630	DHRS4L2	chr14	+	24001383	24001517	23995031	23995133	24004336	24004392	109182	69	104	79	78	168	180	381	393	504	88	97	479	283	150	3.71914e-06	0.000438828	0.319,0.247,0.189	0.696,0.682,0.358	-0.327	147	469	272	490	259	983
110002	ENSG00000066136	NFYC	chr1	+	40735600	40735750	40692007	40692200	40738835	40738948	110002	14	14	3	3	4	2	14	9	9	0	0	0	299	150	1.90994e-07	3.647e-05	0.701,0.637,0.429	1.0,1.0,1.0	-0.411	17	14	18	9	5	9
110377	ENSG00000173915	ATP5MD	chr10	-	103395745	103396032	103394198	103394394	103396408	103396441	110377	279	291	269	130	174	172	334	285	286	17	9	16	300	150	0	0	0.518,0.455,0.439	0.908,0.941,0.899	-0.445	409	351	465	294	441	302
110383	ENSG00000099949	LZTR1	chr22	+	20995367	20995484	20994869	20995026	20995762	20995872	110383	0	0	4	5	2	4	5	3	0	0	0	2	266	150	0.00110618	0.0368815	0.0,0.0,0.361	1.0,1.0,0.0	-0.546	5	5	2	3	8	2
110651	ENSG00000132749	TESMIN	chr11	-	68744990	68745111	68736131	68738788	68747207	68747366	110651	0	2	5	2	4	10	7	6	6	2	1	4	270	150	0.00108526	0.0363292	0.0,0.217,0.217	0.66,0.769,0.455	-0.483	2	9	6	7	15	10
111043	ENSG00000181135	ZNF707	chr8	+	143684755	143685067	143684486	143684542	143689203	143689301	111043	4	6	0	21	21	16	12	6	15	13	14	15	300	150	9.8805e-05	0.00590463	0.087,0.125,0.0	0.316,0.176,0.333	-0.204	25	25	27	20	16	30
111334	ENSG00000171847	FAM90A1	chr12	-	8225835	8225992	8224709	8224888	8226271	8226478	111334	9	4	3	3	4	0	9	7	10	1	1	0	300	150	0.000946397	0.0326868	0.6,0.333,1.0	0.818,0.778,1.0	-0.221	12	10	8	8	3	10
111335	ENSG00000171847	FAM90A1	chr12	-	8225835	8226014	8224790	8224888	8226271	8226478	111335	9	5	4	3	4	0	12	9	10	1	1	0	300	150	0.000856014	0.030233	0.6,0.385,1.0	0.857,0.818,1.0	-0.23	12	13	9	10	4	10
111453	ENSG00000206149	HERC2P9	chr15	+	28629265	28629441	28618523	28618655	28632636	28632807	111453	10	19	2	0	2	6	9	8	14	0	0	0	300	150	0.000308227	0.014135	1.0,0.826,0.143	1.0,1.0,1.0	-0.344	10	9	21	8	8	14
111672	ENSG00000265148	TSPOAP1-AS1	chr17	+	58346279	58346343	58339242	58339447	58351743	58351914	111672	13	7	5	28	64	51	5	14	9	0	0	0	213	150	0	0	0.246,0.072,0.065	1.0,1.0,1.0	-0.872	41	5	71	14	56	9
111909	ENSG00000159788	RGS12	chr4	+	3414071	3414241	3386415	3386437	3414751	3414844	111909	33	12	4	2	4	4	7	9	7	0	0	0	300	150	8.03001e-07	0.000121552	0.892,0.6,0.333	1.0,1.0,1.0	-0.392	35	7	16	9	8	7
112824	ENSG00000122085	MTERF4	chr2	-	241094276	241094429	241089979	241090044	241097242	241097427	112824	146	198	163	66	71	70	330	311	315	2	2	2	300	150	0	0	0.525,0.582,0.538	0.988,0.987,0.987	-0.439	212	332	269	313	233	317
112829	ENSG00000122085	MTERF4	chr2	-	241094276	241094432	241089979	241090044	241097242	241097427	112829	175	253	185	66	71	70	376	411	399	2	2	2	300	150	0	0	0.57,0.641,0.569	0.989,0.99,0.99	-0.396	241	378	324	413	255	401
112834	ENSG00000122085	MTERF4	chr2	-	241096392	241096438	241090005	241090044	241097242	241097427	112834	169	164	173	66	71	70	143	129	153	2	2	2	195	150	0	0	0.663,0.64,0.655	0.982,0.98,0.983	-0.329	235	145	235	131	243	155
113710	ENSG00000114867	EIF4G1	chr3	+	184316131	184316218	184315165	184315545	184317716	184317816	113710	35	17	16	32	13	19	32	22	22	0	7	8	236	150	0.000106926	0.00627486	0.41,0.454,0.349	1.0,0.666,0.636	-0.363	67	32	30	29	35	30
114665	ENSG00000081189	MEF2C	chr5	-	88823734	88823927	88718273	88722829	88883048	88883182	114665	14	22	25	3	4	8	30	20	41	0	0	0	300	150	1.94393e-09	5.94813e-07	0.7,0.733,0.61	1.0,1.0,1.0	-0.319	17	30	26	20	33	41
115262	ENSG00000156026	MCU	chr10	+	72715110	72715226	72692142	72692301	72715853	72715902	115262	21	17	15	7	4	0	13	14	10	0	0	0	265	150	3.17214e-06	0.000386596	0.629,0.706,1.0	1.0,1.0,1.0	-0.222	28	13	21	14	15	10
115654	ENSG00000240344	PPIL3	chr2	-	200885261	200885367	200882341	200882382	200885697	200885772	115654	63	54	38	6	13	15	55	34	24	2	2	0	255	150	9.87913e-06	0.000970998	0.861,0.71,0.598	0.942,0.909,1.0	-0.227	69	57	67	36	53	24
116252	ENSG00000173890	GPR160	chr3	+	170062432	170062992	170057840	170058031	170063202	170063268	116252	21	14	21	0	2	9	20	15	35	0	0	0	300	150	7.18939e-06	0.000749322	1.0,0.778,0.538	1.0,1.0,1.0	-0.228	21	20	16	15	30	35
116973	ENSG00000196511	TPK1	chr7	-	144667725	144667846	144648806	144648879	144681806	144681864	116973	1	14	4	5	3	4	7	4	6	0	0	2	270	150	0.000125673	0.00712029	0.1,0.722,0.357	1.0,1.0,0.625	-0.482	6	7	17	4	8	8
117158	ENSG00000082805	ERC1	chr12	+	1112214	1112307	1110191	1110347	1115865	1116033	117158	2	21	9	5	6	3	18	12	13	1	0	2	242	150	0.000169573	0.00900581	0.199,0.684,0.65	0.918,1.0,0.801	-0.395	7	19	27	12	12	15
117503	ENSG00000142082	SIRT3	chr11	-	233910	234004	233342	233534	236615	236859	117503	3	1	0	4	5	10	2	4	2	0	0	4	243	150	0.000339171	0.0151927	0.316,0.11,0.0	1.0,1.0,0.236	-0.603	7	2	6	4	10	6
117868	ENSG00000034152	MAP2K3	chr17	+	21295674	21295769	21284710	21284969	21296085	21296143	117868	4	1	0	5	9	12	10	8	9	4	0	3	244	150	4.5079e-07	7.58062e-05	0.33,0.064,0.0	0.606,1.0,0.648	-0.62	9	14	10	8	12	12
117871	ENSG00000034152	MAP2K3	chr17	+	21295674	21295769	21287990	21288091	21298412	21298479	117871	0	0	0	60	4	42	4	0	2	2	3	1	244	150	0.00120115	0.0391346	0.0,0.0,0.0	0.551,0.0,0.551	-0.367	60	6	4	3	42	3
118305	ENSG00000188321	ZNF559	chr19	+	9337795	9337865	9324694	9324780	9338493	9338582	118305	14	16	13	5	3	2	27	7	20	0	0	1	219	150	9.09869e-06	0.000904958	0.657,0.785,0.817	1.0,1.0,0.932	-0.224	19	27	19	7	15	21
118907	ENSG00000283667	AC009802.1	chr18	-	63967986	63968273	63966405	63966868	63969322	63970181	118907	7	21	11	4	2	2	9	3	7	0	0	0	300	150	2.26063e-06	0.000296009	0.467,0.84,0.733	1.0,1.0,1.0	-0.32	11	9	23	3	13	7
119419	ENSG00000285756	BX890604.2	chrX	-	3818656	3818703	3818441	3818500	3828505	3828859	119419	30	34	26	8	23	33	37	29	52	0	0	38	196	150	0.00157135	0.0474856	0.742,0.531,0.376	1.0,1.0,0.512	-0.288	38	37	57	29	59	90
119521	ENSG00000115459	ELMOD3	chr2	+	85355554	85355784	85355074	85355170	85356966	85357252	119521	7	11	14	2	10	26	24	21	27	4	8	1	300	150	0.00126091	0.0404627	0.636,0.355,0.212	0.75,0.568,0.931	-0.349	9	28	21	29	40	28
119738	ENSG00000105376	ICAM5	chr19	+	10291071	10291341	10289980	10290125	10291488	10291809	119738	36	37	27	3	4	6	7	7	7	0	0	0	300	150	5.55496e-06	0.000608776	0.857,0.822,0.692	1.0,1.0,1.0	-0.21	39	7	41	7	33	7
119794	ENSG00000223705	NSUN5P1	chr7	+	75411654	75411759	75410605	75410726	75412788	75412932	119794	30	29	21	6	12	3	19	15	34	0	0	0	254	150	5.48651e-09	1.564e-06	0.747,0.588,0.805	1.0,1.0,1.0	-0.287	36	19	41	15	24	34

## Sheet: T21vsD21 IFN
ID...1	GeneID	geneSymbol	chr	strand	exonStart_0base	exonEnd	upstreamES	upstreamEE	downstreamES	downstreamEE	ID...12	IJC_S1R1	IJC_S1R2	IJC_S1R3	SJC_S1R1	SJC_S1R2	SJC_S1R3	IJC_S2R1	IJC_S2R2	IJC_S2R3	SJC_S2R1	SJC_S2R2	SJC_S2R3	IncFormLen	SkipFormLen	PValue	FDR	IncLevel1	IncLevel2	IncLevelDifference	S1R1counts	S2R1counts	S1R2counts	S2R2counts	S1R3counts	S2R3counts
565	ENSG00000229117	RPL41	chr12	+	56116774	56116930	56116632	56116659	56117481	56117826	565	196	116	194	2	0	0	71	193	317	0	127	200	300	150	1.00072e-09	3.34656e-07	0.98,1.0,1.0	1.0,0.432,0.442	0.369	198	71	116	320	194	517
1436	ENSG00000063854	HAGH	chr16	-	1826506	1826602	1822864	1823037	1826711	1826841	1436	230	241	222	194	157	231	65	108	207	143	351	507	245	150	0	0	0.421,0.484,0.37	0.218,0.159,0.2	0.233	424	208	398	459	453	714
2647	ENSG00000227373	AL121983.2	chr1	-	174122083	174122192	174115382	174115649	174155626	174155697	2647	32	22	26	8	2	25	4	7	14	7	18	17	258	150	0.000714803	0.0262278	0.699,0.865,0.377	0.249,0.184,0.324	0.395	40	11	24	25	51	31
2960	ENSG00000211897	IGHG3	chr14	-	105770104	105770149	105769656	105769986	105770292	105770337	2960	288	98	121	287	411	300	263	288	809	5651	8596	9908	194	150	0	0	0.437,0.156,0.238	0.035,0.025,0.059	0.237	575	5914	509	8884	421	10717
2966	ENSG00000211897	IGHG3	chr14	-	105770292	105770337	105770104	105770149	105770480	105770525	2966	464	135	138	3	32	24	1830	360	516	180	767	1010	194	150	0.000198432	0.00985586	0.992,0.765,0.816	0.887,0.266,0.283	0.379	467	2010	167	1127	162	1526
2967	ENSG00000211897	IGHG3	chr14	-	105770292	105770337	105770104	105770149	105770668	105770719	2967	103	53	50	0	1	0	248	536	883	203	322	791	194	150	0	0	1.0,0.976,1.0	0.486,0.563,0.463	0.488	103	451	54	858	50	1674
2969	ENSG00000211897	IGHG3	chr14	-	105770480	105770525	105770104	105770149	105770668	105770719	2969	99	119	84	0	1	0	1252	1136	1963	203	322	791	194	150	0	0	1.0,0.989,1.0	0.827,0.732,0.657	0.258	99	1455	120	1458	84	2754
3368	ENSG00000154102	C16orf74	chr16	-	85710409	85710473	85710163	85710285	85735189	85735235	3368	4	0	8	4	7	4	1	0	0	2	15	40	213	150	1.68606e-05	0.00149869	0.413,0.0,0.585	0.26,0.0,0.0	0.246	8	3	7	15	12	40
4579	ENSG00000115257	PCSK4	chr19	-	1487602	1487691	1487140	1487313	1487784	1487861	4579	4	4	1	5	3	5	0	0	1	2	6	11	238	150	2.49815e-05	0.00204687	0.335,0.457,0.112	0.0,0.0,0.054	0.283	9	2	7	6	6	12
4877	ENSG00000138386	NAB1	chr2	+	190649845	190649982	190648897	190648971	190659276	190659585	4877	2	6	9	0	0	0	3	4	6	0	5	2	286	150	2.65652e-05	0.00214919	1.0,1.0,1.0	1.0,0.296,0.611	0.364	2	3	6	9	9	8
5205	ENSG00000196684	HSH2D	chr19	+	16151446	16151578	16148723	16148800	16152551	16153208	5205	22	30	24	1	1	4	18	43	76	9	18	41	281	150	6.95159e-07	0.000108463	0.922,0.941,0.762	0.516,0.56,0.497	0.351	23	27	31	61	28	117
5981	ENSG00000221923	ZNF880	chr19	+	52379420	52379540	52374298	52374427	52383848	52383969	5981	73	80	118	28	25	26	2	4	9	14	36	79	269	150	0	0	0.592,0.641,0.717	0.074,0.058,0.06	0.586	101	16	105	40	144	88
6528	ENSG00000188994	ZNF292	chr6	+	87155190	87155361	87152832	87152869	87215902	87216057	6528	2	4	2	0	0	0	3	4	15	0	4	3	300	150	4.24185e-05	0.00307332	1.0,1.0,1.0	1.0,0.333,0.714	0.318	2	3	4	8	2	18
6559	ENSG00000170667	RASA4B	chr7	-	102490985	102491123	102488462	102488598	102493115	102493285	6559	4	16	31	0	0	2	4	3	3	5	0	3	287	150	8.37318e-05	0.00515059	1.0,1.0,0.89	0.295,1.0,0.343	0.417	4	9	16	3	33	6
6618	ENSG00000106603	COA1	chr7	-	43658711	43659144	43657221	43657269	43729428	43729499	6618	7	0	7	2	13	1	3	0	2	18	31	26	300	150	0.000892909	0.0308967	0.636,0.0,0.778	0.077,0.0,0.037	0.433	9	21	13	31	8	28
6622	ENSG00000106603	COA1	chr7	-	43665657	43665722	43657215	43657269	43729428	43729505	6622	59	59	77	2	13	1	17	55	106	18	31	26	214	150	3.0858e-06	0.000378952	0.954,0.761,0.982	0.398,0.554,0.741	0.335	61	35	72	86	78	132
6961	ENSG00000177628	GBA	chr1	-	155241085	155241180	155239885	155240077	155244094	155244230	6961	12	17	13	0	2	1	6	7	38	3	5	7	244	150	0.000592602	0.022659	1.0,0.839,0.889	0.551,0.463,0.769	0.315	12	9	19	12	14	45
7186	ENSG00000140526	ABHD2	chr15	+	89104181	89104270	89103902	89104044	89113724	89113816	7186	30	27	20	0	0	0	6	17	20	0	5	7	238	150	3.46146e-07	5.88362e-05	1.0,1.0,1.0	1.0,0.682,0.643	0.225	30	6	27	22	20	27
7792	ENSG00000188227	ZNF793	chr19	+	37523409	37523454	37508264	37508403	37532355	37532482	7792	16	8	23	0	1	0	7	6	6	0	2	5	194	150	0.000300134	0.0135324	1.0,0.861,1.0	1.0,0.699,0.481	0.227	16	7	9	8	23	11
8762	ENSG00000267360	AC012309.1	chr19	-	37198938	37199054	37190023	37190150	37210440	37210512	8762	12	11	12	0	0	2	2	13	7	2	0	5	265	150	0.00106255	0.0349637	1.0,1.0,0.773	0.361,1.0,0.442	0.323	12	4	11	13	14	12
8850	ENSG00000164808	SPIDR	chr8	+	47728932	47729102	47713488	47713641	47735306	47735529	8850	3	10	14	0	2	9	2	5	3	12	9	30	300	150	1.07766e-05	0.00104573	1.0,0.714,0.438	0.077,0.217,0.048	0.603	3	14	12	14	23	33
8889	ENSG00000064989	CALCRL	chr2	-	187431296	187431364	187387665	187387756	187448038	187448146	8889	4	6	4	0	1	0	4	6	6	0	2	12	217	150	9.95432e-05	0.00588687	1.0,0.806,1.0	1.0,0.675,0.257	0.291	4	4	7	8	4	18
9303	ENSG00000120438	TCP1	chr6	-	159787742	159787871	159783940	159784067	159789404	159789596	9303	11	15	16	3	8	1	2	12	3	12	8	16	278	150	9.01844e-05	0.00547857	0.664,0.503,0.896	0.083,0.447,0.092	0.48	14	14	23	20	17	19
9346	ENSG00000015153	YAF2	chr12	-	42210547	42210619	42161612	42161765	42235613	42235755	9346	8	8	12	1	0	0	5	20	13	9	12	6	221	150	2.75697e-08	6.65987e-06	0.844,1.0,1.0	0.274,0.531,0.595	0.481	9	14	8	32	12	19
9984	ENSG00000007129	CEACAM21	chr19	+	41586153	41586195	41585839	41585871	41586463	41586844	9984	39	44	52	0	0	0	19	62	80	16	56	112	191	150	0	0	1.0,1.0,1.0	0.483,0.465,0.359	0.564	39	35	44	118	52	192
10418	ENSG00000079263	SP140	chr2	+	230253315	230253417	230248884	230248968	230255451	230255532	10418	361	293	409	207	215	302	44	70	159	59	152	254	251	150	1.08702e-12	6.60348e-10	0.51,0.449,0.447	0.308,0.216,0.272	0.203	568	103	508	222	711	413
10552	ENSG00000157020	SEC13	chr3	-	10319256	10319316	10319138	10319172	10320508	10321058	10552	6	9	11	9	19	22	0	0	2	2	4	9	209	150	0.000115084	0.00655667	0.324,0.254,0.264	0.0,0.0,0.138	0.235	15	2	28	4	33	11
10920	ENSG00000125885	MCM8	chr20	+	5972575	5972726	5972006	5972037	5977875	5978017	10920	7	4	10	10	5	5	0	2	4	13	5	10	300	150	0.00113564	0.0367331	0.259,0.286,0.5	0.0,0.167,0.167	0.237	17	13	9	7	15	14
11170	ENSG00000115840	SLC25A12	chr2	-	171810223	171810276	171793626	171793767	171815120	171815202	11170	4	3	5	0	0	0	2	3	5	4	0	3	202	150	2.42559e-05	0.00199858	1.0,1.0,1.0	0.271,1.0,0.553	0.392	4	6	3	3	5	8
11471	ENSG00000223745	CCDC18-AS1	chr1	-	93305387	93305470	93264639	93264772	93324634	93324729	11471	48	40	68	0	7	0	15	22	44	7	10	4	232	150	0.000152154	0.00810633	1.0,0.787,1.0	0.581,0.587,0.877	0.247	48	22	47	32	68	48
11476	ENSG00000223745	CCDC18-AS1	chr1	-	93309714	93309790	93305387	93305470	93324634	93324649	11476	8	9	16	25	14	26	0	2	0	3	8	17	225	150	4.41336e-06	0.000505125	0.176,0.3,0.291	0.0,0.143,0.0	0.208	33	3	23	10	42	17
11481	ENSG00000223745	CCDC18-AS1	chr1	-	93318167	93318228	93264644	93264772	93324634	93324691	11481	7	5	24	0	7	0	0	6	2	7	10	4	210	150	2.96425e-05	0.00234637	1.0,0.338,1.0	0.0,0.3,0.263	0.592	7	7	12	16	24	6
11550	ENSG00000140299	BNIP2	chr15	-	59668102	59668138	59665349	59665442	59668891	59668949	11550	6	8	10	0	0	0	0	12	19	4	7	15	185	150	9.97367e-10	3.34623e-07	1.0,1.0,1.0	0.0,0.582,0.507	0.637	6	4	8	19	10	34
12077	ENSG00000104490	NCALD	chr8	-	101721212	101721351	101719396	101719648	101887140	101887227	12077	5	3	7	0	0	0	1	9	13	37	116	187	288	150	0	0	1.0,1.0,1.0	0.014,0.039,0.035	0.971	5	38	3	125	7	200
12098	ENSG00000104490	NCALD	chr8	-	101779923	101779979	101719385	101719648	101887140	101887227	12098	10	3	10	0	0	0	11	47	65	37	116	187	205	150	0	0	1.0,1.0,1.0	0.179,0.229,0.203	0.796	10	48	3	163	10	252
12539	ENSG00000102098	SCML2	chrX	-	18242438	18242590	18239313	18241379	18246576	18246755	12539	3	7	4	0	2	0	13	21	29	9	9	10	300	150	0.000534579	0.0208899	1.0,0.636,1.0	0.419,0.538,0.592	0.362	3	22	9	30	4	39
12549	ENSG00000076242	MLH1	chr3	+	36994829	36994953	36993572	36993663	36996623	36996709	12549	10	6	4	4	32	25	0	0	2	8	16	18	273	150	7.90206e-05	0.00494674	0.579,0.093,0.081	0.0,0.0,0.058	0.232	14	8	38	16	29	20
12741	ENSG00000250299	MRPS31P4	chr13	+	52629218	52629359	52627437	52627578	52637304	52637446	12741	23	30	31	0	0	2	12	8	23	2	7	8	290	150	1.48215e-07	2.80747e-05	1.0,1.0,0.889	0.756,0.372,0.598	0.388	23	14	30	15	33	31
13070	ENSG00000181555	SETD2	chr3	-	47086194	47086314	47066991	47067118	47097954	47097961	13070	29	13	32	1	0	0	4	13	30	8	0	6	269	150	2.96847e-05	0.0023479	0.942,1.0,1.0	0.218,1.0,0.736	0.329	30	12	13	13	32	36
13831	ENSG00000124613	ZNF391	chr6	+	27395016	27395095	27388991	27389075	27399441	27399548	13831	5	0	4	2	5	4	0	0	0	5	6	8	228	150	2.13883e-05	0.00180578	0.622,0.0,0.397	0.0,0.0,0.0	0.34	7	5	5	6	8	8
14402	ENSG00000183077	AFMID	chr17	+	78205092	78205190	78204827	78204900	78205439	78205518	14402	34	26	36	2	2	6	30	28	46	10	13	14	247	150	0.000347289	0.0151915	0.912,0.888,0.785	0.646,0.567,0.666	0.235	36	40	28	41	42	60
15978	ENSG00000205560	CPT1B	chr22	-	50573807	50573921	50573519	50573715	50574334	50574419	15978	428	345	625	127	88	155	62	158	266	65	121	201	263	150	0	0	0.658,0.691,0.697	0.352,0.427,0.43	0.279	555	127	433	279	780	467
17637	ENSG00000213185	FAM24B	chr10	-	122850423	122850520	122849095	122849439	122855644	122855786	17637	56	33	62	4	0	2	17	41	73	4	26	31	246	150	2.16405e-10	8.25918e-08	0.895,1.0,0.95	0.722,0.49,0.589	0.348	60	21	33	67	64	104
17638	ENSG00000213185	FAM24B	chr10	-	122850423	122850550	122849077	122849439	122855644	122855786	17638	72	40	92	4	0	2	35	63	102	4	26	31	276	150	4.77616e-09	1.35829e-06	0.907,1.0,0.962	0.826,0.568,0.641	0.278	76	39	40	89	94	133
17730	ENSG00000074582	BCS1L	chr2	+	218660036	218660166	218659713	218659743	218660938	218661307	17730	114	138	160	1	37	53	34	182	179	55	81	97	279	150	0.000210505	0.0103471	0.984,0.667,0.619	0.249,0.547,0.498	0.325	115	89	175	263	213	276
17733	ENSG00000074582	BCS1L	chr2	+	218660036	218660218	218659708	218659743	218660938	218661307	17733	110	103	157	1	37	53	22	142	181	55	81	97	300	150	0.00032353	0.0144095	0.982,0.582,0.597	0.167,0.467,0.483	0.348	111	77	140	223	210	278
17734	ENSG00000074582	BCS1L	chr2	+	218660036	218660245	218659734	218659743	218660938	218661307	17734	116	108	160	1	37	53	24	147	188	55	81	97	300	150	0.000305817	0.0137163	0.983,0.593,0.602	0.179,0.476,0.492	0.344	117	79	145	228	213	285
17779	ENSG00000270647	TAF15	chr17	+	35809971	35810063	35809483	35809576	35820023	35820075	17779	7	8	11	0	1	0	3	9	10	8	1	8	241	150	1.59474e-06	0.000220951	1.0,0.833,1.0	0.189,0.849,0.438	0.452	7	11	9	10	11	18
18192	ENSG00000092330	TINF2	chr14	-	24241674	24241776	24241019	24241116	24242140	24242605	18192	12	8	12	0	0	0	4	17	22	4	3	2	251	150	4.76671e-06	0.00053254	1.0,1.0,1.0	0.374,0.772,0.868	0.329	12	8	8	20	12	24
18388	ENSG00000116830	TTF2	chr1	+	117098205	117098238	117096148	117096299	117098832	117098907	18388	8	16	15	9	8	7	3	7	17	9	23	31	182	150	0.000443436	0.0182759	0.423,0.622,0.638	0.216,0.201,0.311	0.318	17	12	24	30	22	48
18850	ENSG00000219481	NBPF1	chr1	-	16589898	16590001	16588848	16589063	16591846	16592056	18850	9	2	5	3	0	2	0	0	2	3	2	0	252	150	0.00157266	0.0471269	0.641,1.0,0.598	0.0,0.0,1.0	0.413	12	3	2	2	7	2
20054	ENSG00000137496	IL18BP	chr11	+	71999227	71999370	71998911	71999019	71999616	71999662	20054	51	46	62	17	4	5	2	6	14	2	4	13	292	150	6.50186e-05	0.0042571	0.606,0.855,0.864	0.339,0.435,0.356	0.398	68	4	50	10	67	27
20693	ENSG00000112290	WASF1	chr6	-	110177146	110177186	110160634	110160732	110178597	110178742	20693	1	2	5	7	2	15	0	0	0	2	11	10	189	150	8.7716e-05	0.00536352	0.102,0.442,0.209	0.0,0.0,0.0	0.251	8	2	4	11	20	10
20838	ENSG00000228192	AL512353.1	chr1	-	42844510	42844610	42843403	42843450	42846256	42846387	20838	27	18	22	0	0	2	3	26	41	4	1	7	249	150	0.000409386	0.0171716	1.0,1.0,0.869	0.311,0.94,0.779	0.28	27	7	18	27	24	48
21108	ENSG00000250155	AC008957.1	chr5	-	36705679	36705851	36668564	36668711	36725113	36725195	21108	122	137	206	36	28	42	9	27	43	11	32	44	300	150	3.89688e-14	2.74804e-11	0.629,0.71,0.71	0.29,0.297,0.328	0.378	158	20	165	59	248	87
21132	ENSG00000268350	FAM156A	chrX	-	52955153	52955243	52947257	52948705	52956272	52956346	21132	258	8	11	0	0	1	11	6	12	0	20	3	239	150	5.94488e-06	0.000642454	1.0,1.0,0.873	1.0,0.158,0.715	0.333	258	11	8	26	12	15
21133	ENSG00000268350	FAM156A	chrX	-	52955153	52955246	52947253	52948705	52956272	52956346	21133	414	31	48	0	0	1	21	23	40	0	20	3	242	150	3.00915e-06	0.000371315	1.0,1.0,0.967	1.0,0.416,0.892	0.22	414	21	31	43	49	43
21584	ENSG00000270231	NBPF8	chr1	+	120440741	120440814	120439475	120439690	120441277	120441489	21584	36	44	121	0	0	0	21	101	66	6	6	15	222	150	3.68401e-10	1.3412e-07	1.0,1.0,1.0	0.703,0.919,0.748	0.21	36	27	44	107	121	81
21589	ENSG00000270231	NBPF8	chr1	+	120447093	120447166	120445828	120446043	120447629	120447841	21589	18	19	14	0	0	0	2	0	14	1	5	2	222	150	2.06088e-06	0.000273359	1.0,1.0,1.0	0.575,0.0,0.825	0.533	18	3	19	5	14	16
22164	ENSG00000250222	AC008443.5	chr5	+	181193341	181193467	181192069	181192140	181194233	181194428	22164	18	4	18	20	5	12	0	6	3	2	8	29	275	150	0.000812433	0.0287417	0.329,0.304,0.45	0.0,0.29,0.053	0.247	38	2	9	14	30	32
22370	ENSG00000136100	VPS36	chr13	-	52417991	52418056	52416016	52416093	52425931	52426066	22370	7	7	9	0	0	0	2	6	12	0	2	6	214	150	9.64799e-06	0.000954249	1.0,1.0,1.0	1.0,0.678,0.584	0.246	7	2	7	8	9	18
23695	ENSG00000153113	CAST	chr5	+	96740744	96740783	96740037	96740118	96741265	96741317	23695	946	733	1163	0	0	0	169	441	656	139	307	507	188	150	0	0	1.0,1.0,1.0	0.492,0.534,0.508	0.489	946	308	733	748	1163	1163
23917	ENSG00000198089	SFI1	chr22	+	31604308	31604404	31589446	31589577	31606327	31606430	23917	6	2	6	3	4	7	0	0	3	2	11	5	245	150	0.000496951	0.0198365	0.55,0.234,0.344	0.0,0.0,0.269	0.286	9	2	6	11	13	8
24024	ENSG00000185485	SDHAP1	chr3	-	195986518	195986604	195985445	195985789	195990189	195990258	24024	242	187	226	0	0	0	27	99	177	5	25	50	235	150	0	0	1.0,1.0,1.0	0.775,0.717,0.693	0.272	242	32	187	124	226	227
24178	ENSG00000175581	MRPL48	chr11	+	73789334	73789490	73787894	73787992	73825707	73825796	24178	11	7	11	4	9	4	2	2	17	10	7	47	300	150	0.000235682	0.011269	0.579,0.28,0.579	0.091,0.125,0.153	0.356	15	12	16	9	15	64
24463	ENSG00000162616	DNAJB4	chr1	+	77992753	77992866	77979231	77979293	78013050	78013514	24463	2	4	4	12	3	19	0	0	0	14	18	8	262	150	3.83891e-05	0.00286318	0.087,0.433,0.108	0.0,0.0,0.0	0.209	14	14	7	18	23	8
25300	ENSG00000159063	ALG8	chr11	-	78109441	78109581	78104355	78104453	78139493	78139614	25300	4	6	15	0	0	1	0	3	1	4	0	2	289	150	6.38016e-06	0.000683024	1.0,1.0,0.886	0.0,1.0,0.206	0.56	4	4	6	3	16	3
25331	ENSG00000159063	ALG8	chr11	-	78124020	78124214	78104355	78104453	78139493	78139624	25331	4	8	8	0	0	1	0	8	2	4	0	2	300	150	3.55222e-05	0.00268549	1.0,1.0,0.8	0.0,1.0,0.333	0.489	4	4	8	8	9	4
26606	ENSG00000115204	MPV17	chr2	-	27316158	27316186	27312679	27312772	27317077	27317173	26606	5	8	7	0	0	0	2	4	4	0	4	4	177	150	4.07732e-06	0.000474064	1.0,1.0,1.0	1.0,0.459,0.459	0.361	5	2	8	8	7	8
26877	ENSG00000268230	AC012313.3	chr19	-	58357951	58358286	58357584	58357649	58358488	58358585	26877	6	10	9	3	0	3	0	0	6	12	4	1	300	150	0.000364706	0.0157786	0.5,1.0,0.6	0.0,0.0,0.75	0.45	9	12	10	4	12	7
27852	ENSG00000050426	LETMD1	chr12	+	51053811	51053860	51052091	51052207	51056349	51056502	27852	12	13	9	8	3	18	0	3	5	3	8	25	198	150	0.000699012	0.0257959	0.532,0.767,0.275	0.0,0.221,0.132	0.407	20	3	16	11	27	30
28499	ENSG00000112511	PHF1	chr6	+	33411165	33411215	33410757	33410887	33412247	33412422	28499	43	33	56	4	6	9	9	21	29	3	10	14	199	150	0.000776928	0.0278893	0.89,0.806,0.824	0.693,0.613,0.61	0.201	47	12	39	31	65	43
29832	ENSG00000070831	CDC42	chr1	+	22074093	22074219	22052626	22052868	22078428	22078583	29832	323	314	416	0	0	0	106	266	398	33	98	132	275	150	0	0	1.0,1.0,1.0	0.637,0.597,0.622	0.381	323	139	314	364	416	530
29923	ENSG00000245937	LINC01184	chr5	-	128081972	128082191	127965887	127966928	128082734	128082974	29923	41	42	39	12	2	14	8	27	62	11	23	52	300	150	8.18659e-05	0.00506127	0.631,0.913,0.582	0.267,0.37,0.373	0.372	53	19	44	50	53	114
30401	ENSG00000196152	ZNF79	chr9	+	127428551	127428660	127424373	127424803	127428831	127428920	30401	130	85	111	31	25	29	6	24	64	7	20	33	258	150	0.000316617	0.014139	0.709,0.664,0.69	0.333,0.411,0.53	0.263	161	13	110	44	140	97
30783	ENSG00000126456	IRF3	chr19	-	49664442	49664673	49663187	49663258	49665630	49665705	30783	45	40	61	3	6	7	11	38	65	5	17	20	300	150	9.3766e-05	0.00563571	0.882,0.769,0.813	0.524,0.528,0.619	0.264	48	16	46	55	68	85
30785	ENSG00000126456	IRF3	chr19	-	49664552	49664673	49663187	49663258	49665630	49665788	30785	45	40	60	3	6	7	11	38	65	5	17	20	270	150	9.32128e-05	0.00560615	0.893,0.787,0.826	0.55,0.554,0.644	0.253	48	16	46	55	67	85
31323	ENSG00000148399	DPH7	chr9	-	137574751	137574846	137565084	137565154	137576079	137576167	31323	7	5	3	0	1	0	3	18	10	2	7	6	244	150	8.65787e-06	0.000880059	1.0,0.755,1.0	0.48,0.613,0.506	0.385	7	5	6	25	3	16
31748	ENSG00000136231	IGF2BP3	chr7	-	23416128	23416219	23351443	23351586	23418775	23418824	31748	5	0	4	0	2	3	0	0	0	7	3	16	240	150	0.000101629	0.0059693	1.0,0.0,0.455	0.0,0.0,0.0	0.485	5	7	2	3	7	16
31959	ENSG00000156171	DRAM2	chr1	-	111139500	111139666	111137522	111137586	111140037	111140090	31959	591	547	781	1	0	2	105	283	407	61	108	171	300	150	0	0	0.997,1.0,0.995	0.463,0.567,0.543	0.473	592	166	547	391	783	578
31961	ENSG00000156171	DRAM2	chr1	-	111139587	111139711	111137522	111137586	111140037	111140062	31961	86	89	150	1	0	2	43	97	161	61	108	171	273	150	0	0	0.979,1.0,0.976	0.279,0.33,0.341	0.668	87	104	89	205	152	332
32285	ENSG00000017260	ATP2C1	chr3	+	130854185	130854269	130850782	130850928	130855880	130856223	32285	5	2	2	9	2	10	0	0	0	14	5	10	233	150	8.69137e-06	0.000882591	0.263,0.392,0.114	0.0,0.0,0.0	0.256	14	14	4	5	12	10
32527	ENSG00000109861	CTSC	chr11	-	88327928	88328016	88312387	88312554	88328111	88328196	32527	2	2	10	8	6	7	0	0	3	3	14	13	237	150	0.000402509	0.0169567	0.137,0.174,0.475	0.0,0.0,0.127	0.22	10	3	8	14	17	16
33442	ENSG00000206530	CFAP44	chr3	-	113344515	113344712	113341743	113341918	113358744	113358875	33442	28	28	33	3	1	3	10	17	19	3	4	13	300	150	0.000281668	0.0129096	0.824,0.933,0.846	0.625,0.68,0.422	0.292	31	13	29	21	36	32
33473	ENSG00000164654	MIOS	chr7	+	7567606	7567688	7566871	7567072	7568025	7568123	33473	267	207	261	27	24	29	12	74	130	17	41	50	231	150	1.46711e-08	3.75614e-06	0.865,0.848,0.854	0.314,0.54,0.628	0.362	294	29	231	115	290	180
33474	ENSG00000164654	MIOS	chr7	+	7567606	7567688	7566871	7567072	7572435	7572667	33474	112	93	123	132	121	149	4	41	60	82	182	208	231	150	1.66533e-15	1.41299e-12	0.355,0.333,0.349	0.031,0.128,0.158	0.24	244	86	214	223	272	268
33581	ENSG00000198612	COPS8	chr2	+	237087463	237087563	237085908	237086042	237088604	237088653	33581	7	1	9	19	8	6	0	0	5	8	16	34	249	150	0.000789219	0.0281533	0.182,0.07,0.475	0.0,0.0,0.081	0.215	26	8	9	16	15	39
33886	ENSG00000247240	UBL7-AS1	chr15	+	74461882	74462031	74461264	74461418	74466035	74466130	33886	17	19	29	0	2	2	3	27	41	3	7	8	298	150	0.00155325	0.0466817	1.0,0.827,0.879	0.335,0.66,0.721	0.33	17	6	21	34	31	49
34583	ENSG00000197889	MEIG1	chr10	+	14966439	14966606	14959438	14959557	14972512	14972851	34583	20	10	10	0	2	1	2	3	0	5	2	4	300	150	6.88888e-08	1.45524e-05	1.0,0.714,0.833	0.167,0.429,0.0	0.65	20	7	12	5	11	4
34600	ENSG00000107862	GBF1	chr10	+	102362474	102362664	102360183	102360395	102365396	102365599	34600	14	19	10	0	0	0	4	18	15	0	6	3	300	150	3.43555e-06	0.000412045	1.0,1.0,1.0	1.0,0.6,0.714	0.229	14	4	19	24	10	18
34783	ENSG00000160570	DEDD2	chr19	-	42202050	42202072	42199464	42199829	42204461	42204559	34783	5	2	1	0	0	7	0	0	2	2	2	3	171	150	7.99708e-05	0.00498797	1.0,1.0,0.111	0.0,0.0,0.369	0.581	5	2	2	2	8	5
35237	ENSG00000179532	DNHD1	chr11	+	6548644	6548933	6548209	6548402	6556682	6558297	35237	58	41	86	14	19	23	6	21	28	4	17	29	300	150	0.000142953	0.00772438	0.674,0.519,0.652	0.429,0.382,0.326	0.236	72	10	60	38	109	57
35570	ENSG00000213096	ZNF254	chr19	+	24105939	24106066	24091900	24092015	24126253	24126320	35570	7	9	14	0	0	1	7	2	9	6	0	1	276	150	0.000822963	0.0290242	1.0,1.0,0.884	0.388,1.0,0.83	0.222	7	13	9	2	15	10
36180	ENSG00000197586	ENTPD6	chr20	+	25197104	25197226	25195791	25195867	25207078	25207397	36180	3	6	7	2	1	7	0	3	0	2	9	3	271	150	0.000114469	0.00653616	0.454,0.769,0.356	0.0,0.156,0.0	0.474	5	2	7	12	14	3
36643	ENSG00000160336	ZNF761	chr19	+	53445000	53445123	53431992	53432028	53446226	53446337	36643	43	55	53	11	4	11	11	26	47	12	17	17	272	150	0.000616249	0.0233976	0.683,0.883,0.727	0.336,0.458,0.604	0.298	54	23	59	43	64	64
36931	ENSG00000166436	TRIM66	chr11	-	8654433	8654578	8651799	8651903	8663128	8663248	36931	56	29	109	9	5	12	12	13	39	6	5	15	294	150	0.000712023	0.0261631	0.76,0.747,0.823	0.505,0.57,0.57	0.228	65	18	34	18	121	54
37727	ENSG00000137959	IFI44L	chr1	+	78627905	78628393	78620402	78620571	78628950	78628999	37727	4113	3442	5125	39	19	30	32	250	239	112	445	486	300	150	0	0	0.981,0.989,0.988	0.125,0.219,0.197	0.806	4152	144	3461	695	5155	725
37728	ENSG00000137959	IFI44L	chr1	+	78627905	78628393	78620402	78620571	78635336	78635489	37728	1491	1284	2023	5	2	2	25	103	115	12	35	47	300	150	0	0	0.993,0.997,0.998	0.51,0.595,0.55	0.444	1496	37	1286	138	2025	162
38455	ENSG00000127081	ZNF484	chr9	-	92875014	92875059	92856191	92856318	92877889	92878008	38455	21	25	27	10	8	7	4	10	13	5	17	17	194	150	2.0294e-05	0.00173624	0.619,0.707,0.749	0.382,0.313,0.372	0.336	31	9	33	27	34	30
38561	ENSG00000274523	RCC1L	chr7	-	75055900	75056074	75042182	75043109	75058587	75058769	38561	13	21	11	1	1	1	7	16	18	8	5	7	300	150	4.31354e-05	0.00310772	0.867,0.913,0.846	0.304,0.615,0.563	0.381	14	15	22	21	12	25
38618	ENSG00000001631	KRIT1	chr7	-	92245426	92245595	92244901	92245171	92245905	92246059	38618	7	10	9	9	12	8	0	7	2	3	11	26	300	150	0.00166441	0.0490187	0.28,0.294,0.36	0.0,0.241,0.037	0.219	16	3	22	18	17	28
39335	ENSG00000109184	DCUN1D4	chr4	+	51848204	51848367	51843152	51843267	51860542	51860663	39335	4	2	6	0	1	0	2	3	3	0	7	4	300	150	3.67694e-05	0.00275945	1.0,0.5,1.0	1.0,0.176,0.273	0.35	4	2	3	10	6	7
39447	ENSG00000285012	AC092723.3	chr16	-	85987983	85988086	85986763	85987057	85995209	85995899	39447	29	17	44	55	45	46	0	0	0	11	18	46	252	150	3.10862e-15	2.53291e-12	0.239,0.184,0.363	0.0,0.0,0.0	0.262	84	11	62	18	90	46
39680	ENSG00000111817	DSE	chr6	+	116369824	116369927	116258445	116258967	116399197	116399937	39680	46	33	36	5	12	3	0	2	1	3	4	13	252	150	3.7268e-12	2.05705e-09	0.846,0.621,0.877	0.0,0.229,0.044	0.69	51	3	45	6	39	14
40202	ENSG00000231389	HLA-DPA1	chr6	-	33069018	33069300	33064568	33065347	33073470	33073669	40202	86	72	123	1	1	0	32	66	120	6	19	12	300	150	2.48335e-12	1.42432e-09	0.977,0.973,1.0	0.727,0.635,0.833	0.252	87	38	73	85	123	132
40866	ENSG00000243335	KCTD7	chr7	+	66639127	66639228	66638855	66638929	66643534	66643611	40866	3	2	3	8	0	3	0	0	2	2	10	6	250	150	0.000722507	0.026438	0.184,1.0,0.375	0.0,0.0,0.167	0.464	11	2	2	10	6	8
42088	ENSG00000216863	LY86-AS1	chr6	-	6438575	6438732	6369001	6369155	6564294	6564388	42088	43	46	56	0	0	2	33	146	104	6	10	25	300	150	5.6056e-08	1.2297e-05	1.0,1.0,0.933	0.733,0.88,0.675	0.215	43	39	46	156	58	129
42364	ENSG00000163389	POGLUT1	chr3	+	119478333	119478474	119477312	119477448	119479907	119480172	42364	4	16	25	2	3	2	1	8	12	1	12	11	290	150	0.000130661	0.00723531	0.508,0.734,0.866	0.341,0.256,0.361	0.383	6	2	19	20	27	23
43130	ENSG00000204843	DCTN1	chr2	-	74383742	74383806	74377999	74378245	74391187	74391228	43130	6	4	12	1	0	0	0	3	5	5	2	0	213	150	0.000193383	0.0096817	0.809,1.0,1.0	0.0,0.514,1.0	0.432	7	5	4	5	12	5
43133	ENSG00000204843	DCTN1	chr2	-	74390582	74390728	74377999	74378245	74391187	74391228	43133	27	23	18	1	0	0	7	17	29	5	2	0	295	150	0.000907758	0.031284	0.932,1.0,1.0	0.416,0.812,1.0	0.235	28	12	23	19	18	29
43750	ENSG00000187210	GCNT1	chr9	+	76460059	76460177	76459229	76459305	76500915	76501061	43750	55	68	75	96	74	87	0	6	30	24	33	84	267	150	7.74204e-07	0.000119704	0.243,0.34,0.326	0.0,0.093,0.167	0.216	151	24	142	39	162	114
43945	ENSG00000197713	RPE	chr2	+	210003437	210003468	210002627	210002783	210009638	210009736	43945	3	3	7	0	0	9	2	0	2	2	4	7	180	150	0.00104525	0.0345829	1.0,1.0,0.393	0.455,0.0,0.192	0.582	3	4	3	4	16	9
44523	ENSG00000149635	OCSTAMP	chr20	-	46545326	46546329	46540945	46541927	46550516	46550574	44523	2	2	5	0	2	0	12	16	12	9	22	13	300	150	0.000899186	0.031072	1.0,0.333,1.0	0.4,0.267,0.316	0.45	2	21	4	38	5	25
44658	ENSG00000166747	AP1G1	chr16	-	71807800	71807838	71806685	71806728	71808014	71808150	44658	7	4	16	0	0	0	1	6	13	2	1	3	187	150	0.000976854	0.0330114	1.0,1.0,1.0	0.286,0.828,0.777	0.37	7	3	4	7	16	16
44810	ENSG00000132128	LRRC41	chr1	-	46279181	46279257	46267494	46267677	46281124	46281161	44810	8	3	7	0	0	0	0	3	19	2	4	1	225	150	2.41807e-05	0.00199398	1.0,1.0,1.0	0.0,0.333,0.927	0.58	8	2	3	7	7	20
44901	ENSG00000284713	SMIM38	chr11	+	69157173	69159351	69155909	69156114	69159445	69159752	44901	294	181	254	0	9	15	22	88	72	6	10	30	300	150	7.52514e-09	2.06805e-06	1.0,0.91,0.894	0.647,0.815,0.545	0.266	294	28	190	98	269	102
45432	ENSG00000067836	ROGDI	chr16	-	4801049	4801321	4800497	4800578	4801502	4801585	45432	64	95	76	11	8	9	29	98	120	12	38	39	300	150	3.64906e-06	0.000434102	0.744,0.856,0.809	0.547,0.563,0.606	0.231	75	41	103	136	85	159
45511	ENSG00000144567	RETREG2	chr2	+	219181061	219181205	219180109	219180245	219181639	219181663	45511	0	2	4	4	0	0	0	0	0	2	4	5	293	150	0.000303513	0.0136368	0.0,1.0,1.0	0.0,0.0,0.0	0.667	4	2	2	4	4	5
45628	ENSG00000158483	FAM86C1	chr11	+	71791735	71791819	71789782	71789845	71793379	71793481	45628	50	33	42	2	1	1	4	28	56	4	5	14	233	150	1.47437e-05	0.00133952	0.942,0.955,0.964	0.392,0.783,0.72	0.322	52	8	34	33	43	70
45700	ENSG00000161265	U2AF1L4	chr19	-	35745124	35745187	35744322	35744738	35745347	35745398	45700	42	35	76	0	0	2	16	29	77	2	14	7	212	150	1.59875e-07	3.00615e-05	1.0,1.0,0.964	0.85,0.594,0.886	0.211	42	18	35	43	78	84
46379	ENSG00000130741	EIF2S3	chrX	+	24065997	24066092	24062415	24062574	24071557	24071727	46379	4	10	11	0	5	0	2	5	1	1	7	10	244	150	0.000119239	0.00672251	1.0,0.551,1.0	0.551,0.305,0.058	0.546	4	3	15	12	11	11
46813	ENSG00000166169	POLL	chr10	-	101583507	101583681	101580247	101580416	101587245	101587406	46813	11	7	17	21	11	27	0	0	0	19	11	34	300	150	1.67177e-12	9.80758e-10	0.208,0.241,0.239	0.0,0.0,0.0	0.229	32	19	18	11	44	34
46874	ENSG00000163864	NMNAT3	chr3	-	139573597	139573680	139560179	139561392	139578871	139579055	46874	8	17	12	0	0	0	11	22	23	7	0	3	232	150	3.18679e-05	0.00246179	1.0,1.0,1.0	0.504,1.0,0.832	0.221	8	18	17	22	12	26
46937	ENSG00000137073	UBAP2	chr9	-	33928371	33928612	33927796	33927992	33933489	33933628	46937	22	13	22	4	7	4	6	14	13	6	15	18	300	150	0.000216889	0.0105882	0.733,0.481,0.733	0.333,0.318,0.265	0.344	26	12	20	29	26	31
48247	ENSG00000215837	SDHAP2	chr3	+	195661755	195661841	195658095	195658165	195662570	195662733	48247	85	67	78	0	0	0	5	16	21	3	6	15	235	150	0	0	1.0,1.0,1.0	0.515,0.63,0.472	0.461	85	8	67	22	78	36
48248	ENSG00000215837	SDHAP2	chr3	+	195663623	195663767	195662570	195662733	195664085	195664250	48248	98	120	129	8	10	14	27	81	151	15	33	46	293	150	4.43024e-09	1.26342e-06	0.862,0.86,0.825	0.48,0.557,0.627	0.294	106	42	130	114	143	197
48377	ENSG00000136098	NEK3	chr13	-	52141019	52141069	52136799	52136902	52143915	52143987	48377	30	13	10	0	0	0	4	20	17	5	37	23	199	150	0	0	1.0,1.0,1.0	0.376,0.289,0.358	0.659	30	9	13	57	10	40
49253	ENSG00000161249	DMKN	chr19	-	35506125	35506185	35505938	35505986	35507457	35507511	49253	2	3	8	0	1	1	9	14	31	9	9	11	209	150	0.00028035	0.0128779	1.0,0.683,0.852	0.418,0.528,0.669	0.307	2	18	4	23	9	42
49947	ENSG00000163870	TPRA1	chr3	-	127595451	127595690	127594799	127594933	127598195	127598251	49947	2	8	2	0	1	1	5	6	14	2	14	10	300	150	0.000247611	0.0116824	1.0,0.8,0.5	0.556,0.176,0.412	0.385	2	7	9	20	3	24
50124	ENSG00000162910	MRPL55	chr1	-	228108436	228108474	228108234	228108318	228109260	228109299	50124	46	29	67	65	43	70	6	19	35	37	70	107	187	150	2.24955e-07	4.04467e-05	0.362,0.351,0.434	0.115,0.179,0.208	0.215	111	43	72	89	137	142
50142	ENSG00000162910	MRPL55	chr1	-	228108954	228109021	228107666	228107869	228109260	228109295	50142	4	10	6	0	2	0	6	4	4	4	3	7	216	150	4.49658e-06	0.000511792	1.0,0.776,1.0	0.51,0.481,0.284	0.5	4	10	12	7	6	11
50566	ENSG00000187097	ENTPD5	chr14	-	74007695	74007812	73996516	73996776	74011090	74011150	50566	7	10	12	0	1	4	1	4	3	3	4	5	266	150	0.000114306	0.00653407	1.0,0.849,0.628	0.158,0.361,0.253	0.568	7	4	11	8	16	8
50771	ENSG00000243716	NPIPB5	chr16	+	22513521	22513600	22507344	22507399	22513763	22513921	50771	12	39	85	0	1	0	13	9	31	1	4	6	228	150	1.21113e-06	0.000174881	1.0,0.962,1.0	0.895,0.597,0.773	0.232	12	14	40	13	85	37
50773	ENSG00000243716	NPIPB5	chr16	+	22513521	22513610	22507336	22507399	22513763	22513834	50773	2	27	49	0	1	0	11	11	39	1	4	6	238	150	9.06496e-06	0.000910621	1.0,0.944,1.0	0.874,0.634,0.804	0.211	2	12	28	15	49	45
51899	ENSG00000285628	AC126755.6	chr16	-	18334850	18334967	18328113	18328242	18336850	18337061	51899	6	5	7	0	0	0	0	6	2	2	0	3	266	150	0.000125216	0.00699037	1.0,1.0,1.0	0.0,1.0,0.273	0.576	6	2	5	6	7	5
52184	ENSG00000072864	NDE1	chr16	+	15699728	15699854	15694164	15694256	15724190	15724222	52184	82	33	83	0	0	45	1	40	41	23	2	95	275	150	0.000868687	0.0302728	1.0,1.0,0.502	0.023,0.916,0.191	0.457	82	24	33	42	128	136
52197	ENSG00000189164	ZNF527	chr19	+	37380276	37380372	37379119	37379236	37388305	37388783	52197	9	23	14	1	1	0	21	16	31	4	4	11	245	150	1.21772e-05	0.00115756	0.846,0.934,1.0	0.763,0.71,0.633	0.225	10	25	24	20	14	42
52283	ENSG00000142185	TRPM2	chr21	+	44427009	44427111	44426659	44426736	44435130	44435217	52283	155	161	169	11	16	17	42	196	215	63	246	238	251	150	0	0	0.894,0.857,0.856	0.285,0.323,0.351	0.549	166	105	177	442	186	453
53070	ENSG00000096996	IL12RB1	chr19	-	18090649	18090769	18083431	18083491	18098754	18098927	53070	90	50	87	1	1	0	1	52	103	5	14	11	269	150	7.32548e-08	1.53171e-05	0.98,0.965,1.0	0.1,0.674,0.839	0.444	91	6	51	66	87	114
53147	ENSG00000205746	AC126755.1	chr16	-	18349932	18350153	18349628	18349744	18350889	18351561	53147	7	12	28	0	2	0	6	5	6	0	1	17	300	150	0.000857796	0.0299849	1.0,0.75,1.0	1.0,0.714,0.15	0.295	7	6	14	6	28	23
53151	ENSG00000205746	AC126755.1	chr16	-	18352211	18352283	18351773	18351943	18352404	18352476	53151	68	15	165	35	33	61	7	13	5	12	45	58	221	150	2.04445e-05	0.00174766	0.569,0.236,0.647	0.284,0.164,0.055	0.316	103	19	48	58	226	63
53198	ENSG00000168385	45171	chr2	+	241324215	241324241	241315860	241315982	241324408	241324662	53198	10	2	4	0	0	0	3	7	14	4	2	0	175	150	0.00155039	0.046623	1.0,1.0,1.0	0.391,0.75,1.0	0.286	10	7	2	9	4	14
53200	ENSG00000168385	45171	chr2	+	241324215	241324241	241315860	241315982	241335125	241335212	53200	34	22	43	0	0	0	5	11	29	3	0	18	175	150	1.37981e-07	2.64783e-05	1.0,1.0,1.0	0.588,1.0,0.58	0.277	34	8	22	11	43	47
53304	ENSG00000090266	NDUFB2	chr7	+	140698074	140698268	140696991	140697074	140702865	140703010	53304	2	2	4	6	0	6	0	0	0	2	10	11	300	150	0.000811651	0.0287239	0.143,1.0,0.25	0.0,0.0,0.0	0.464	8	2	2	10	10	11
54470	ENSG00000151276	MAGI1	chr3	-	65375744	65375945	65364852	65364946	65379260	65379554	54470	4	2	3	0	0	0	15	20	39	1	5	5	300	150	5.07783e-06	0.000564195	1.0,1.0,1.0	0.882,0.667,0.796	0.218	4	16	2	25	3	44
54471	ENSG00000151276	MAGI1	chr3	-	65375744	65375948	65364852	65364946	65379260	65379554	54471	10	3	2	0	0	0	14	20	44	1	5	5	300	150	5.66443e-06	0.000621302	1.0,1.0,1.0	0.875,0.667,0.815	0.214	10	15	3	25	2	49
54809	ENSG00000025708	TYMP	chr22	-	50529495	50529731	50527587	50527717	50529903	50530032	54809	306	242	429	118	53	98	48	163	231	46	88	124	300	150	2.07601e-05	0.00176728	0.565,0.695,0.686	0.343,0.481,0.482	0.213	424	94	295	251	527	355
54812	ENSG00000025708	TYMP	chr22	-	50529495	50529754	50527164	50527283	50529903	50529999	54812	30	50	70	21	14	9	0	17	22	11	24	24	300	150	6.11949e-05	0.00407959	0.417,0.641,0.795	0.0,0.262,0.314	0.426	51	11	64	41	79	46
55169	ENSG00000184860	SDR42E1	chr16	-	82007640	82007868	82000790	82000884	82011386	82011465	55169	84	51	74	6	6	15	20	61	60	7	18	24	300	150	0.000440381	0.0181939	0.875,0.81,0.712	0.588,0.629,0.556	0.208	90	27	57	79	89	84
57119	ENSG00000168393	DTYMK	chr2	-	241682798	241682915	241682154	241682333	241685768	241685877	57119	10	20	22	0	3	1	5	23	14	6	5	14	266	150	5.23642e-05	0.00359116	1.0,0.79,0.925	0.32,0.722,0.361	0.437	10	11	23	28	23	28
57509	ENSG00000059122	FLYWCH1	chr16	+	2936331	2936425	2934614	2934667	2937120	2937384	57509	5	5	13	2	0	1	0	0	2	3	2	0	243	150	6.7048e-05	0.00436492	0.607,1.0,0.889	0.0,0.0,1.0	0.499	7	3	5	2	14	2
58945	ENSG00000151575	TEX9	chr15	+	56389317	56389400	56383951	56384031	56394164	56394247	58945	25	15	12	0	0	0	3	22	24	2	10	19	232	150	8.56759e-13	5.29875e-10	1.0,1.0,1.0	0.492,0.587,0.45	0.49	25	5	15	32	12	43
61055	ENSG00000143761	ARF1	chr1	+	228096450	228096504	228083149	228083309	228097077	228097262	61055	7	0	7	8	14	17	0	0	0	4	15	16	203	150	3.94111e-06	0.000460312	0.393,0.0,0.233	0.0,0.0,0.0	0.209	15	4	14	15	24	16
61225	ENSG00000153234	NR4A2	chr2	-	156330667	156330791	156329322	156330188	156332479	156332714	61225	15	11	21	0	0	0	11	16	27	2	2	3	273	150	0.000189688	0.00956499	1.0,1.0,1.0	0.751,0.815,0.832	0.201	15	13	11	18	21	30
61358	ENSG00000266786	LGALS9DP	chr17	+	27752848	27752884	27749783	27749894	27753401	27753452	61358	11	10	3	0	0	0	3	1	2	2	2	1	185	150	0.00024902	0.0117274	1.0,1.0,1.0	0.549,0.288,0.619	0.515	11	5	10	3	3	3
61505	ENSG00000136856	SLC2A8	chr9	+	127402556	127402753	127399906	127400006	127403737	127403791	61505	118	120	144	1	0	0	20	69	81	7	4	14	300	150	3.10413e-11	1.40326e-08	0.983,1.0,1.0	0.588,0.896,0.743	0.252	119	27	120	73	144	95
61578	ENSG00000148814	LRRC27	chr10	+	132348962	132349057	132347983	132348356	132351606	132351753	61578	81	86	99	45	50	66	9	10	21	11	33	37	244	150	1.90161e-06	0.000255868	0.525,0.514,0.48	0.335,0.157,0.259	0.256	126	20	136	43	165	58
61815	ENSG00000163617	CCDC191	chr3	-	114053596	114053635	114046590	114046732	114056376	114056613	61815	5	11	10	0	0	2	4	2	9	6	0	9	188	150	0.000106361	0.00618672	1.0,1.0,0.8	0.347,1.0,0.444	0.336	5	10	11	2	12	18
61980	ENSG00000213468	FIRRE	chrX	-	131804971	131805037	131794296	131794466	131825221	131825365	61980	32	18	24	8	5	10	0	2	2	2	6	3	215	150	4.50082e-05	0.00320664	0.736,0.715,0.626	0.0,0.189,0.317	0.524	40	2	23	8	34	5
62022	ENSG00000266338	NBPF15	chr1	-	144440401	144440581	144440140	144440295	144442669	144442920	62022	13	8	26	16	20	4	0	3	9	10	19	35	300	150	0.000736445	0.0268301	0.289,0.167,0.765	0.0,0.073,0.114	0.345	29	10	28	22	30	44
62265	ENSG00000010626	LRRC23	chr12	+	6909889	6910026	6907314	6907445	6913890	6914228	62265	33	30	47	0	0	6	18	52	62	7	15	7	286	150	0.000469219	0.0190555	1.0,1.0,0.804	0.574,0.645,0.823	0.254	33	25	30	67	53	69
62436	ENSG00000138111	MFSD13A	chr10	+	102465981	102466087	102461394	102461450	102468954	102469197	62436	42	28	24	0	1	4	28	34	24	10	6	6	255	150	0.000265334	0.0123319	1.0,0.943,0.779	0.622,0.769,0.702	0.21	42	38	29	40	28	30
62438	ENSG00000138111	MFSD13A	chr10	+	102468286	102468332	102465980	102466087	102468954	102469197	62438	5	4	6	20	9	11	1	0	2	21	14	22	195	150	3.62995e-05	0.00273218	0.161,0.255,0.296	0.035,0.0,0.065	0.204	25	22	13	14	17	24
62521	ENSG00000170632	ARMC10	chr7	+	103092476	103092653	103086868	103086937	103098298	103098683	62521	15	10	20	0	0	0	4	18	19	4	9	2	300	150	1.43127e-08	3.67786e-06	1.0,1.0,1.0	0.333,0.5,0.826	0.447	15	8	10	27	20	21
62772	ENSG00000119725	ZNF410	chr14	+	73922065	73922206	73920145	73921105	73923394	73923522	62772	534	491	645	57	89	126	135	427	644	97	211	311	290	150	0	0	0.829,0.74,0.726	0.419,0.511,0.517	0.283	591	232	580	638	771	955
62885	ENSG00000161813	LARP4	chr12	+	50402674	50402813	50400888	50401028	50427764	50427909	62885	27	14	38	7	7	8	2	36	35	25	29	85	288	150	6.74962e-07	0.000105956	0.668,0.51,0.712	0.04,0.393,0.177	0.427	34	27	21	65	46	120
62889	ENSG00000161813	LARP4	chr12	+	50412404	50412453	50400955	50401028	50427764	50427909	62889	45	47	63	7	7	8	9	52	55	25	29	85	198	150	2.28745e-09	6.98931e-07	0.83,0.836,0.856	0.214,0.576,0.329	0.468	52	34	54	81	71	140
62896	ENSG00000161813	LARP4	chr12	+	50416345	50416434	50400895	50401028	50427764	50427909	62896	4	7	7	7	7	8	1	5	8	25	29	85	238	150	3.25518e-06	0.000395495	0.265,0.387,0.355	0.025,0.098,0.056	0.276	11	26	14	34	15	93
63580	ENSG00000134490	TMEM241	chr18	-	23370215	23370261	23356593	23356663	23373711	23373763	63580	22	8	17	2	2	7	3	10	11	2	10	11	195	150	0.00135882	0.0421586	0.894,0.755,0.651	0.536,0.435,0.435	0.298	24	5	10	20	24	22
64309	ENSG00000140396	NCOA2	chr8	-	70148272	70148483	70141178	70141399	70157124	70157146	64309	24	26	41	0	0	0	1	17	19	2	0	5	300	150	0.00124632	0.0394919	1.0,1.0,1.0	0.2,1.0,0.655	0.382	24	3	26	17	41	24
64330	ENSG00000076662	ICAM3	chr19	-	10339017	10339245	10338681	10338863	10339538	10339624	64330	61	108	108	7	9	14	5	10	30	8	8	10	300	150	1.0947e-05	0.00105926	0.813,0.857,0.794	0.238,0.385,0.6	0.414	68	13	117	18	122	40
64378	ENSG00000167460	TPM4	chr19	+	16077956	16078149	16077020	16077130	16080914	16081075	64378	1	4	2	2	2	3	0	0	1	2	2	8	300	150	0.000164572	0.00862032	0.2,0.5,0.25	0.0,0.0,0.059	0.297	3	2	6	2	5	9
64649	ENSG00000186470	BTN3A2	chr6	+	26368182	26368267	26367974	26368050	26368564	26368912	64649	146	169	216	81	60	103	26	106	163	27	79	249	234	150	5.82082e-06	0.000631184	0.536,0.644,0.573	0.382,0.462,0.296	0.204	227	53	229	185	319	412
65104	ENSG00000174652	ZNF266	chr19	-	9418765	9418895	9418504	9418631	9419216	9419299	65104	96	64	123	26	16	26	24	64	65	16	60	99	279	150	9.00428e-11	3.65385e-08	0.665,0.683,0.718	0.446,0.364,0.261	0.332	122	40	80	124	149	164
65425	ENSG00000144802	NFKBIZ	chr3	+	101829612	101829688	101827990	101828184	101852084	101852224	65425	99	128	172	0	1	4	9	37	48	6	1	6	225	150	2.71045e-05	0.0021825	1.0,0.988,0.966	0.5,0.961,0.842	0.217	99	15	129	38	176	54
65685	ENSG00000066827	ZFAT	chr8	-	134564986	134565152	134520882	134521001	134565332	134565421	65685	14	3	16	0	1	2	3	4	14	3	4	9	300	150	4.56774e-05	0.00324756	1.0,0.6,0.8	0.333,0.333,0.438	0.432	14	6	4	8	18	23
66333	ENSG00000249859	PVT1	chr8	+	127795893	127796008	127794556	127794734	127939507	127939609	66333	20	20	20	1	0	0	2	8	49	1	3	3	264	150	0.0010185	0.0339827	0.919,1.0,1.0	0.532,0.602,0.903	0.294	21	3	20	11	20	52
66932	ENSG00000140987	ZSCAN32	chr16	-	3390422	3390517	3390009	3390133	3397191	3397744	66932	28	36	43	2	0	1	8	31	44	6	4	8	244	150	1.40887e-05	0.00129504	0.896,1.0,0.964	0.45,0.827,0.772	0.27	30	14	36	35	44	52
66985	ENSG00000179406	LINC00174	chr7	-	66390103	66390250	66382236	66382427	66395878	66395919	66985	10	14	14	0	0	1	0	5	14	3	4	6	296	150	2.75662e-08	6.65987e-06	1.0,1.0,0.876	0.0,0.388,0.542	0.649	10	3	14	9	15	20
66996	ENSG00000179406	LINC00174	chr7	-	66401194	66401394	66400922	66401027	66407289	66407364	66996	9	7	16	1	0	0	0	3	19	5	0	2	300	150	0.00109405	0.0357028	0.818,1.0,1.0	0.0,1.0,0.826	0.331	10	5	7	3	16	21
67150	ENSG00000145214	DGKQ	chr4	-	966063	966301	965490	965529	966465	966527	67150	9	10	12	1	0	0	4	24	26	2	3	3	300	150	0.000108066	0.00626813	0.818,1.0,1.0	0.5,0.8,0.813	0.235	10	6	10	27	12	29
67491	ENSG00000229474	PATL2	chr15	-	44675485	44675691	44674292	44674411	44676474	44676550	67491	44	46	48	0	3	0	9	25	44	6	6	0	300	150	0.000351622	0.0153288	1.0,0.885,1.0	0.429,0.676,1.0	0.26	44	15	49	31	48	44
68121	ENSG00000080603	SRCAP	chr16	+	30722562	30722748	30720161	30720331	30722962	30723229	68121	2	11	4	1	0	0	6	5	13	4	4	0	300	150	0.000270436	0.0125008	0.5,1.0,1.0	0.429,0.385,1.0	0.229	3	10	11	9	4	13
68649	ENSG00000172053	QARS	chr3	-	49099509	49099647	49099109	49099253	49099960	49100091	68649	5	4	5	1	1	0	2	5	2	0	7	4	287	150	0.000605436	0.0230734	0.723,0.676,1.0	1.0,0.272,0.207	0.307	6	2	5	12	5	6
69098	ENSG00000004534	RBM6	chr3	+	49999439	49999513	49962575	49962685	50054334	50054395	69098	2	4	3	0	0	0	2	0	0	0	2	4	223	150	2.50776e-07	4.44662e-05	1.0,1.0,1.0	1.0,0.0,0.0	0.667	2	2	4	2	3	4
69904	ENSG00000186281	GPAT2	chr2	-	96023308	96023440	96022957	96023023	96023922	96024000	69904	3	2	5	0	0	0	51	133	242	7	27	43	281	150	5.69922e-06	0.000623121	1.0,1.0,1.0	0.795,0.724,0.75	0.244	3	58	2	160	5	285
70128	ENSG00000116044	NFE2L2	chr2	-	177283599	177283804	177234004	177234271	177287610	177287777	70128	9	3	9	0	0	0	2	15	7	0	2	4	300	150	0.000450799	0.0184682	1.0,1.0,1.0	1.0,0.789,0.467	0.248	9	2	3	17	9	11
70423	ENSG00000197343	ZNF655	chr7	+	99562348	99562494	99560532	99560695	99571687	99571717	70423	35	28	57	1	29	0	13	5	2	13	30	49	295	150	2.61303e-08	6.40255e-06	0.947,0.329,1.0	0.337,0.078,0.02	0.614	36	26	57	35	57	51
70432	ENSG00000197343	ZNF655	chr7	+	99571259	99571379	99560532	99560695	99571687	99571792	70432	15	10	7	1	29	0	1	4	10	13	30	49	269	150	5.00891e-05	0.00345824	0.893,0.161,1.0	0.041,0.069,0.102	0.614	16	14	39	34	7	59
70741	ENSG00000142945	KIF2C	chr1	+	44762228	44762295	44761915	44761983	44762544	44762613	70741	4	3	4	0	0	0	0	6	6	2	0	4	216	150	0.000816125	0.0288326	1.0,1.0,1.0	0.0,1.0,0.51	0.497	4	2	3	6	4	10
70790	ENSG00000109332	UBE2D3	chr4	-	102825238	102825317	102809791	102809855	102825737	102825785	70790	7	9	9	0	0	0	0	1	12	2	2	2	228	150	7.06414e-06	0.000746132	1.0,1.0,1.0	0.0,0.248,0.798	0.651	7	2	9	3	9	14
71058	ENSG00000173599	PC	chr11	-	66954248	66954436	66952295	66952468	66957739	66957902	71058	6	12	4	0	0	2	4	20	16	4	1	10	300	150	0.00157426	0.0471611	1.0,1.0,0.5	0.333,0.909,0.444	0.271	6	8	12	21	6	26
71313	ENSG00000172775	FAM192A	chr16	-	57175538	57175700	57174619	57174688	57185824	57186040	71313	8	3	2	2	0	0	4	0	2	0	3	10	300	150	0.00012897	0.00716463	0.667,1.0,1.0	1.0,0.0,0.091	0.525	10	4	3	3	2	12
71517	ENSG00000112486	CCR6	chr6	+	167123118	167123223	167111806	167112014	167136037	167136143	71517	40	18	26	27	12	32	9	25	33	34	68	77	254	150	4.53547e-06	0.000514513	0.467,0.47,0.324	0.135,0.178,0.202	0.249	67	43	30	93	58	110
71519	ENSG00000112486	CCR6	chr6	+	167123138	167123223	167111806	167112014	167136037	167136143	71519	40	17	20	27	12	32	11	23	22	34	68	77	234	150	1.34103e-05	0.00124582	0.487,0.476,0.286	0.172,0.178,0.155	0.248	67	45	29	91	52	99
72869	ENSG00000188234	AGAP4	chr10	-	45848842	45848912	45847859	45847954	45853654	45853875	72869	43	22	34	10	0	10	0	5	12	3	11	7	219	150	0.000295363	0.0133727	0.747,1.0,0.7	0.0,0.237,0.54	0.557	53	3	22	16	44	19
73135	ENSG00000122643	NT5C3A	chr7	-	33035933	33035988	33026816	33026915	33062567	33062796	73135	1241	937	1225	223	208	331	164	547	685	149	306	394	204	150	4.44089e-16	3.99933e-13	0.804,0.768,0.731	0.447,0.568,0.561	0.242	1464	313	1145	853	1556	1079
73588	ENSG00000132436	FIGNL1	chr7	-	50447967	50448055	50446980	50447297	50448180	50448289	73588	165	93	129	160	122	194	19	34	66	76	200	291	237	150	0	0	0.395,0.325,0.296	0.137,0.097,0.126	0.219	325	95	215	234	323	357
73590	ENSG00000132436	FIGNL1	chr7	-	50449117	50449723	50448180	50448289	50450300	50450390	73590	104	73	128	13	0	11	37	68	104	11	23	12	300	150	0.00108439	0.0354454	0.8,1.0,0.853	0.627,0.596,0.813	0.206	117	48	73	91	139	116
73772	ENSG00000116580	GON4L	chr1	-	155831534	155831620	155826869	155827028	155832831	155832950	73772	9	10	6	1	5	0	0	0	16	8	2	7	235	150	0.00050094	0.0199415	0.852,0.561,1.0	0.0,0.0,0.593	0.607	10	8	15	2	6	23
73806	ENSG00000104529	EEF1D	chr8	-	143590607	143590729	143589510	143590081	143597347	143597415	73806	40	35	31	15	33	22	6	42	50	70	126	93	271	150	3.87053e-08	8.96994e-06	0.596,0.37,0.438	0.045,0.156,0.229	0.325	55	76	68	168	53	143
73808	ENSG00000104529	EEF1D	chr8	-	143590607	143590735	143589694	143590081	143597347	143597415	73808	41	36	32	15	33	22	7	42	54	70	126	93	277	150	5.42308e-08	1.19476e-05	0.597,0.371,0.441	0.051,0.153,0.239	0.322	56	77	69	168	54	147
73809	ENSG00000104529	EEF1D	chr8	-	143590607	143590738	143586728	143586852	143592646	143592797	73809	2	2	2	0	2	0	0	0	2	2	3	0	280	150	7.98794e-05	0.00498797	1.0,0.349,1.0	0.0,0.0,1.0	0.45	2	2	4	3	2	2
73816	ENSG00000104529	EEF1D	chr8	-	143590607	143590738	143588990	143590081	143597347	143597415	73816	45	48	47	15	33	22	16	44	62	70	126	93	280	150	1.19339e-10	4.78592e-08	0.616,0.438,0.534	0.109,0.158,0.263	0.353	60	86	81	170	69	155
73817	ENSG00000104529	EEF1D	chr8	-	143590644	143590735	143589893	143590081	143597347	143597411	73817	22	8	29	15	33	22	5	6	14	70	126	93	240	150	1.04255e-08	2.78008e-06	0.478,0.132,0.452	0.043,0.029,0.086	0.301	37	75	41	132	51	107
73819	ENSG00000104529	EEF1D	chr8	-	143590644	143590738	143589643	143590081	143597347	143597415	73819	30	16	37	15	33	22	11	8	22	70	126	93	243	150	1.26681e-09	4.05162e-07	0.552,0.23,0.509	0.088,0.038,0.127	0.346	45	81	49	134	59	115
74100	ENSG00000164989	CCDC171	chr9	+	15724775	15724976	15723680	15723746	15727868	15728036	74100	40	18	40	1	2	3	16	15	29	2	8	8	300	150	0.000871996	0.0303464	0.952,0.818,0.87	0.8,0.484,0.644	0.237	41	18	20	23	43	37
74138	ENSG00000171428	NAT1	chr8	+	18216876	18216994	18211284	18211342	18219410	18219489	74138	2	6	14	0	0	0	0	3	11	2	0	5	267	150	0.000398521	0.016844	1.0,1.0,1.0	0.0,1.0,0.553	0.482	2	2	6	3	14	16
74515	ENSG00000145362	ANK2	chr4	+	113374763	113374946	113373284	113373449	113381456	113383732	74515	50	31	58	22	21	16	24	37	40	24	34	58	300	150	0.00032439	0.0144296	0.532,0.425,0.644	0.333,0.352,0.256	0.22	72	48	52	71	74	98
74762	ENSG00000242086	MUC20-OT1	chr3	+	195663623	195663832	195662570	195662733	195664085	195664109	74762	21	22	17	8	10	14	9	8	28	15	33	46	300	150	2.32052e-05	0.00192747	0.568,0.524,0.378	0.231,0.108,0.233	0.299	29	24	32	41	31	74
74788	ENSG00000242086	MUC20-OT1	chr3	+	195696360	195696589	195689336	195689438	195699029	195699116	74788	37	33	50	0	0	4	6	23	54	7	11	16	300	150	1.05056e-08	2.78696e-06	1.0,1.0,0.862	0.3,0.511,0.628	0.474	37	13	33	34	54	70
74863	ENSG00000168734	PKIG	chr20	+	44582584	44582731	44531784	44531978	44589796	44589866	74863	225	132	178	49	78	45	80	141	201	53	137	167	296	150	4.07774e-05	0.00298603	0.699,0.462,0.667	0.433,0.343,0.379	0.224	274	133	210	278	223	368
74948	ENSG00000031823	RANBP3	chr19	-	5957906	5957973	5951392	5951596	5978060	5978140	74948	34	25	42	5	0	0	15	10	37	4	5	8	216	150	0.000159146	0.00839176	0.825,1.0,1.0	0.723,0.581,0.763	0.253	39	19	25	15	42	45
74959	ENSG00000031823	RANBP3	chr19	-	5957917	5957973	5933411	5933479	5978060	5978085	74959	33	25	42	8	4	0	15	11	37	6	15	21	205	150	4.50811e-05	0.00320961	0.751,0.821,1.0	0.647,0.349,0.563	0.338	41	21	29	26	42	58
75366	ENSG00000184988	TMEM106A	chr17	+	43212314	43212394	43211834	43211922	43213020	43213252	75366	117	112	134	19	4	9	20	53	64	16	9	19	229	150	0.000268921	0.0124519	0.801,0.948,0.907	0.45,0.794,0.688	0.241	136	36	116	62	143	83
75998	ENSG00000179818	PCBP1-AS1	chr2	-	70059642	70059680	70051202	70051305	70077300	70077381	75998	10	15	4	0	0	2	1	2	10	1	2	5	187	150	0.000187593	0.00949196	1.0,1.0,0.616	0.445,0.445,0.616	0.37	10	2	15	4	6	15
76020	ENSG00000179818	PCBP1-AS1	chr2	-	70077300	70077381	70059642	70059680	70083506	70083687	76020	3	5	7	1	8	0	0	1	1	2	4	5	230	150	1.21676e-05	0.00115756	0.662,0.29,1.0	0.0,0.14,0.115	0.566	4	2	13	5	7	6
76101	ENSG00000101003	GINS1	chr20	+	25411123	25411286	25407730	25407895	25441701	25441776	76101	11	14	13	8	7	14	1	2	7	3	13	21	300	150	6.6179e-05	0.00431857	0.407,0.5,0.317	0.143,0.071,0.143	0.289	19	4	21	15	27	28
76211	ENSG00000069424	KCNAB2	chr1	+	6085739	6085793	6085203	6085248	6086157	6086362	76211	12	15	11	23	4	5	2	14	6	20	19	37	203	150	0.0013088	0.041066	0.278,0.735,0.619	0.069,0.353,0.107	0.368	35	22	19	33	16	43
76637	ENSG00000197912	SPG7	chr16	+	89546131	89546181	89545871	89546030	89546657	89546760	76637	6	2	9	1	0	0	6	3	8	0	2	4	199	150	0.00131558	0.0412158	0.819,1.0,1.0	1.0,0.531,0.601	0.229	7	6	2	5	9	12
77359	ENSG00000145332	KLHL8	chr4	-	87185250	87185799	87183202	87183389	87195323	87195690	77359	85	47	106	19	0	10	29	84	141	9	31	36	300	150	0.0011526	0.0371062	0.691,1.0,0.841	0.617,0.575,0.662	0.226	104	38	47	115	116	177
77423	ENSG00000101353	MROH8	chr20	-	37155062	37155167	37147773	37147909	37157859	37157955	77423	10	11	18	12	14	10	4	2	8	8	19	27	254	150	0.000304953	0.0136836	0.33,0.317,0.515	0.228,0.059,0.149	0.242	22	12	25	21	28	35
79390	ENSG00000111711	GOLT1B	chr12	+	21507943	21508109	21506884	21506976	21512294	21512376	79390	37	31	37	13	16	26	13	17	33	14	21	42	300	150	0.00142909	0.0437572	0.587,0.492,0.416	0.317,0.288,0.282	0.203	50	27	47	38	63	75
80350	ENSG00000240288	GHRLOS	chr3	+	10287413	10287481	10285753	10285853	10287944	10288102	80350	10	4	14	0	0	0	6	17	12	2	2	5	217	150	2.72694e-06	0.00034309	1.0,1.0,1.0	0.675,0.855,0.624	0.282	10	8	4	19	14	17
80864	ENSG00000148840	PPRC1	chr10	+	102144249	102144307	102139099	102142004	102146671	102147392	80864	10	11	12	1	0	0	0	2	7	12	1	0	207	150	0.000207036	0.0102091	0.879,1.0,1.0	0.0,0.592,1.0	0.429	11	12	11	3	12	7
82321	ENSG00000032742	IFT88	chr13	+	20615792	20615879	20605034	20605105	20625749	20625849	82321	65	75	87	2	0	0	4	80	99	2	14	9	236	150	1.4466e-07	2.75539e-05	0.954,1.0,1.0	0.56,0.784,0.875	0.245	67	6	75	94	87	108
82402	ENSG00000166888	STAT6	chr12	-	57110076	57110110	57108162	57108299	57111109	57111374	82402	15	13	15	13	14	44	6	6	9	15	42	52	183	150	0.000930867	0.0318704	0.486,0.432,0.218	0.247,0.105,0.124	0.22	28	21	27	48	59	61
82642	ENSG00000135124	P2RX4	chr12	+	121223257	121223434	121222093	121222166	121228532	121228613	82642	12	5	10	12	5	13	0	5	0	5	5	20	300	150	0.00048785	0.0195875	0.333,0.333,0.278	0.0,0.333,0.0	0.204	24	5	10	10	23	20
82845	ENSG00000285106	AC016831.7	chr7	-	130884316	130884396	130872500	130872758	130912109	130912152	82845	42	23	32	4	0	0	0	3	8	2	3	2	229	150	0.000107384	0.00623562	0.873,1.0,1.0	0.0,0.396,0.724	0.584	46	2	23	6	32	10
83026	ENSG00000280987	MATR3	chr5	+	139293452	139293575	139279934	139280058	139314674	139314736	83026	5	6	5	0	0	0	0	0	4	4	10	5	272	150	4.44089e-16	3.99933e-13	1.0,1.0,1.0	0.0,0.0,0.306	0.898	5	4	6	10	5	9
83441	ENSG00000068400	GRIPAP1	chrX	-	48981794	48981872	48981595	48981691	48982978	48983092	83441	1087	942	1286	23	42	47	233	590	994	63	226	354	227	150	0	0	0.969,0.937,0.948	0.71,0.633,0.65	0.287	1110	296	984	816	1333	1348
83610	ENSG00000131650	KREMEN2	chr16	+	2967525	2967604	2967319	2967445	2967809	2968379	83610	3	5	14	0	1	0	4	27	25	4	13	7	228	150	3.1386e-06	0.000384515	1.0,0.767,1.0	0.397,0.577,0.701	0.364	3	8	6	40	14	32
83719	ENSG00000283050	GTF2IP12	chr4	-	119450040	119450150	119448827	119448959	119454245	119454638	83719	30	12	11	1	2	0	6	21	11	2	6	8	259	150	3.09244e-05	0.00240592	0.946,0.777,1.0	0.635,0.67,0.443	0.325	31	8	14	27	11	19
84694	ENSG00000119801	YPEL5	chr2	+	30148244	30148305	30147006	30147062	30155849	30155910	84694	3	3	6	6	6	9	0	0	1	2	2	5	210	150	6.7293e-05	0.0043781	0.263,0.263,0.323	0.0,0.0,0.125	0.241	9	2	9	2	15	6
85358	ENSG00000107242	PIP5K1B	chr9	+	68742500	68742657	68705699	68705762	68818460	68818545	85358	356	338	472	162	146	0	55	161	275	51	128	144	300	150	7.99598e-05	0.00498797	0.524,0.537,1.0	0.35,0.386,0.488	0.279	518	106	484	289	472	419
85774	ENSG00000072849	DERL2	chr17	-	5481100	5481142	5480053	5480144	5486068	5486159	85774	5	5	6	1	0	1	2	8	4	0	6	6	191	150	0.000516288	0.0203161	0.797,1.0,0.825	1.0,0.512,0.344	0.255	6	2	5	14	7	10
86074	ENSG00000167515	TRAPPC2L	chr16	+	88859344	88859443	88858618	88858789	88859572	88859750	86074	33	31	30	0	0	1	4	24	37	0	1	36	248	150	0.000117721	0.00665761	1.0,1.0,0.948	1.0,0.936,0.383	0.21	33	4	31	25	31	73
86622	ENSG00000108523	RNF167	chr17	+	4940486	4940726	4940007	4940230	4941076	4941157	86622	66	62	86	2	0	3	40	56	85	7	8	16	300	150	1.19288e-07	2.3327e-05	0.943,1.0,0.935	0.741,0.778,0.726	0.211	68	47	62	64	89	101
86855	ENSG00000118495	PLAGL1	chr6	-	143960468	143960556	143940337	143942663	143964786	143964818	86855	57	32	60	0	4	0	11	42	45	4	5	11	237	150	8.78142e-06	0.000889097	1.0,0.835,1.0	0.635,0.842,0.721	0.212	57	15	36	47	60	56
86858	ENSG00000118495	PLAGL1	chr6	-	143960472	143960556	143942296	143942663	143964786	143964818	86858	9	10	12	0	4	0	0	13	10	4	5	11	233	150	0.000359188	0.0155792	1.0,0.617,1.0	0.0,0.626,0.369	0.541	9	4	14	18	12	21
86872	ENSG00000118495	PLAGL1	chr6	-	143966157	143966212	143964786	143964818	143968906	143968978	86872	62	66	59	22	28	13	10	42	47	7	23	57	204	150	0.00113949	0.0367994	0.674,0.634,0.769	0.512,0.573,0.377	0.205	84	17	94	65	72	104
86875	ENSG00000118495	PLAGL1	chr6	-	143985134	143985174	143968906	143968978	144008089	144008406	86875	8	11	8	7	18	20	0	5	11	8	38	53	189	150	0.000715144	0.0262309	0.476,0.327,0.241	0.0,0.095,0.141	0.269	15	8	29	43	28	64
86950	ENSG00000188283	ZNF383	chr19	+	37219598	37219749	37217925	37218274	37224817	37224879	86950	23	13	27	19	10	10	2	12	9	8	12	30	300	150	0.00116111	0.0372984	0.377,0.394,0.574	0.111,0.333,0.13	0.257	42	10	23	24	37	39
87006	ENSG00000100490	CDKL1	chr14	-	50332261	50332432	50329403	50330181	50334564	50334621	87006	115	89	136	24	28	27	35	67	68	18	25	61	300	150	0.000361171	0.0156586	0.706,0.614,0.716	0.493,0.573,0.358	0.204	139	53	117	92	163	129
87543	ENSG00000213753	CENPBD1P1	chr19	+	58591497	58591624	58575444	58575588	58598966	58599801	87543	18	34	22	9	21	24	2	2	0	8	40	48	276	150	0	0	0.521,0.468,0.333	0.12,0.026,0.0	0.392	27	10	55	42	46	48
87544	ENSG00000213753	CENPBD1P1	chr19	+	58591497	58591624	58586154	58586356	58598966	58599801	87544	13	23	16	19	4	16	2	2	5	8	25	30	276	150	4.15668e-06	0.000480569	0.271,0.758,0.352	0.12,0.042,0.083	0.379	32	10	27	27	32	35
88108	ENSG00000131374	TBC1D5	chr3	-	17586352	17586557	17562018	17562142	17623848	17623913	88108	23	33	24	0	12	4	2	14	18	6	16	12	300	150	0.000157477	0.00834157	1.0,0.579,0.75	0.143,0.304,0.429	0.484	23	8	45	30	28	30
88113	ENSG00000131374	TBC1D5	chr3	-	17622647	17622765	17562018	17562142	17623848	17623913	88113	21	39	64	0	12	4	4	22	47	6	16	12	267	150	0.00159417	0.0475726	1.0,0.646,0.9	0.272,0.436,0.688	0.383	21	10	51	38	68	59
88505	ENSG00000130755	GMFG	chr19	-	39335260	39335310	39329543	39329626	39335973	39336017	88505	22	18	31	0	0	0	6	20	48	6	0	6	199	150	3.98116e-05	0.00293168	1.0,1.0,1.0	0.43,1.0,0.858	0.237	22	12	18	20	31	54
88513	ENSG00000130755	GMFG	chr19	-	39335434	39335554	39329543	39329626	39335973	39336028	88513	32	26	40	0	0	0	10	42	59	6	0	6	269	150	2.44683e-05	0.00200963	1.0,1.0,1.0	0.482,1.0,0.846	0.224	32	16	26	42	40	65
88692	ENSG00000119688	ABCD4	chr14	-	74299547	74299675	74295147	74295198	74302874	74302910	88692	38	34	64	0	0	0	13	30	37	0	11	7	277	150	4.48315e-08	1.0228e-05	1.0,1.0,1.0	1.0,0.596,0.741	0.221	38	13	34	41	64	44
88785	ENSG00000105341	DMAC2	chr19	-	41433271	41433434	41431318	41432408	41433536	41433673	88785	1034	871	1192	117	105	137	296	760	1123	144	327	473	300	150	0	0	0.815,0.806,0.813	0.507,0.537,0.543	0.282	1151	440	976	1087	1329	1596
91000	ENSG00000188868	ZNF563	chr19	-	12319429	12319833	12319186	12319311	12322584	12322711	91000	38	38	44	0	2	0	8	40	48	4	3	4	300	150	0.000115435	0.00656935	1.0,0.905,1.0	0.5,0.87,0.857	0.226	38	12	40	43	44	52
91204	ENSG00000077684	JADE1	chr4	+	128816366	128816463	128809918	128810291	128831732	128831810	91204	8	11	23	8	17	8	1	6	9	5	24	39	246	150	0.000103314	0.00604374	0.379,0.283,0.637	0.109,0.132,0.123	0.312	16	6	28	30	31	48
91782	ENSG00000203666	EFCAB2	chr1	+	245002120	245002232	244969981	244970443	245017241	245017326	91782	70	39	69	17	31	19	5	12	38	14	27	32	261	150	0.000195474	0.00975139	0.703,0.42,0.676	0.17,0.203,0.406	0.34	87	19	70	39	88	70
92349	ENSG00000178234	GALNT11	chr7	+	152079286	152079408	152027596	152027718	152094189	152094522	92349	19	7	12	11	11	17	1	6	1	6	16	20	271	150	0.000111913	0.0064331	0.489,0.26,0.281	0.084,0.172,0.027	0.249	30	7	18	22	29	21
92412	ENSG00000130758	MAP3K10	chr19	+	40205120	40205296	40198396	40198555	40209102	40209219	92412	7	7	16	0	0	0	6	15	15	2	7	0	300	150	9.80362e-06	0.000965215	1.0,1.0,1.0	0.6,0.517,1.0	0.294	7	8	7	22	16	15
92512	ENSG00000260007	AC107871.1	chr15	-	68199540	68199681	68197528	68197628	68218535	68218573	92512	20	9	21	1	4	0	5	14	21	4	12	7	290	150	0.00113872	0.0367862	0.912,0.538,1.0	0.393,0.376,0.608	0.358	21	9	13	26	21	28
93002	ENSG00000005801	ZNF195	chr11	-	3369356	3369502	3368791	3368855	3370974	3371070	93002	21	8	22	0	0	0	3	7	24	3	4	5	295	150	3.46596e-09	1.01089e-06	1.0,1.0,1.0	0.337,0.471,0.709	0.494	21	6	8	11	22	29
93229	ENSG00000101391	CDK5RAP1	chr20	-	33392141	33392242	33385649	33385770	33401427	33401452	93229	22	20	13	2	0	0	9	4	30	1	10	10	250	150	7.316e-06	0.000765645	0.868,1.0,1.0	0.844,0.194,0.643	0.396	24	10	20	14	13	40
93996	ENSG00000165115	KIF27	chr9	-	83880296	83880494	83870518	83870632	83887040	83887196	93996	32	29	34	0	0	2	3	10	22	1	2	5	300	150	4.72837e-05	0.00333583	1.0,1.0,0.895	0.6,0.714,0.688	0.298	32	4	29	12	36	27
93997	ENSG00000165115	KIF27	chr9	-	83883812	83884018	83870518	83870632	83887040	83887196	93997	8	19	13	0	0	2	2	12	20	1	2	5	300	150	0.000797463	0.0283896	1.0,1.0,0.765	0.5,0.75,0.667	0.283	8	3	19	14	15	25
94725	ENSG00000188690	UROS	chr10	-	125792578	125792744	125789282	125789528	125794021	125794388	94725	2	7	8	1	0	0	9	7	15	3	7	10	300	150	6.16447e-06	0.000663391	0.5,1.0,1.0	0.6,0.333,0.429	0.379	3	12	7	14	8	25
94889	ENSG00000205643	CDPF1	chr22	-	46247109	46247221	46244012	46245238	46250255	46250311	94889	44	35	43	0	0	1	19	57	92	8	3	20	261	150	4.50441e-08	1.02538e-05	1.0,1.0,0.961	0.577,0.916,0.726	0.247	44	27	35	60	44	112
94891	ENSG00000205643	CDPF1	chr22	-	46248171	46248284	46244012	46245238	46250255	46250289	94891	12	32	50	0	0	1	6	8	21	8	3	20	262	150	3.37508e-14	2.42309e-11	1.0,1.0,0.966	0.3,0.604,0.375	0.562	12	14	32	11	51	41
95133	ENSG00000007341	ST7L	chr1	-	112540778	112540872	112523517	112526111	112541950	112541975	95133	22	26	34	8	2	5	5	10	13	6	8	22	243	150	2.19043e-06	0.000286838	0.629,0.889,0.808	0.34,0.436,0.267	0.428	30	11	28	18	39	35
96717	ENSG00000204713	TRIM27	chr6	-	28908807	28908840	28903001	28904665	28911695	28911718	96717	7	7	6	0	2	0	1	4	3	2	5	0	182	150	0.000821856	0.0289951	1.0,0.743,1.0	0.292,0.397,1.0	0.351	7	3	9	9	6	3
97523	ENSG00000147905	ZCCHC7	chr9	+	37302187	37302231	37126311	37126942	37305543	37305714	97523	73	42	48	0	2	5	17	2	0	0	3	12	193	150	0.000765122	0.0275471	1.0,0.942,0.882	1.0,0.341,0.0	0.494	73	17	44	5	53	12
98614	ENSG00000198208	RPS6KL1	chr14	-	74909100	74909190	74908849	74908932	74909542	74910148	98614	10	6	5	0	0	0	8	27	29	4	10	15	239	150	1.61408e-08	4.10172e-06	1.0,1.0,1.0	0.557,0.629,0.548	0.422	10	12	6	37	5	44
98658	ENSG00000170802	FOXN2	chr2	+	48328560	48328702	48314709	48314814	48346200	48346751	98658	80	100	138	211	49	72	29	76	96	91	273	340	291	150	1.93254e-05	0.00166866	0.163,0.513,0.497	0.141,0.125,0.127	0.26	291	120	149	349	210	436
99148	ENSG00000111788	AC009533.1	chr12	+	9311140	9311290	9310338	9310441	9311549	9311618	99148	124	93	150	2	8	10	18	46	83	6	21	23	299	150	2.51561e-10	9.39145e-08	0.969,0.854,0.883	0.601,0.524,0.644	0.312	126	24	101	67	160	106
100669	ENSG00000152439	ZNF773	chr19	+	57508519	57508564	57505301	57505400	57513021	57513151	100669	3	2	5	0	0	2	2	5	4	4	4	4	194	150	0.00013329	0.00734525	1.0,1.0,0.659	0.279,0.491,0.436	0.484	3	6	2	9	7	8
100750	ENSG00000267120	AD000671.2	chr19	-	35745124	35745212	35744625	35744738	35745347	35745432	100750	39	40	87	0	0	2	10	27	77	2	14	7	237	150	3.62252e-08	8.51043e-06	1.0,1.0,0.965	0.76,0.55,0.874	0.26	39	12	40	41	89	84
100828	ENSG00000204852	TCTN1	chr12	+	110634395	110634463	110632471	110632559	110636480	110636501	100828	15	5	18	14	7	21	1	0	0	5	2	7	217	150	2.71877e-07	4.75606e-05	0.425,0.331,0.372	0.121,0.0,0.0	0.336	29	6	12	2	39	7
101223	ENSG00000165490	DDIAS	chr11	+	82913956	82914170	82901697	82901822	82914722	82914851	101223	0	4	5	4	1	0	0	1	0	2	2	13	300	150	0.000287145	0.0130905	0.0,0.667,1.0	0.0,0.2,0.0	0.489	4	2	5	3	5	13
101246	ENSG00000127314	RAP1B	chr12	+	68624674	68624873	68610907	68611052	68641037	68641153	101246	4	6	6	8	4	12	1	0	0	3	4	3	300	150	3.98256e-05	0.00293168	0.2,0.429,0.2	0.143,0.0,0.0	0.229	12	4	10	4	18	3
101349	ENSG00000126883	NUP214	chr9	+	131189052	131189131	131178310	131178410	131195232	131195294	101349	9	4	3	0	0	1	0	2	15	3	7	0	228	150	4.02757e-05	0.00295562	1.0,1.0,0.664	0.0,0.158,1.0	0.502	9	3	4	9	4	15
102864	ENSG00000100100	PIK3IP1	chr22	-	31289314	31289393	31281592	31283288	31289498	31289699	102864	97	61	118	12	1	5	14	22	75	10	9	12	228	150	4.17524e-05	0.00303506	0.842,0.976,0.939	0.479,0.617,0.804	0.286	109	24	62	31	123	87
102929	ENSG00000234956	LINC02539	chr6	-	137784731	137784856	137730169	137730597	137792747	137792835	102929	96	46	72	35	46	56	0	14	12	10	27	17	274	150	0.000689595	0.0255678	0.6,0.354,0.413	0.0,0.221,0.279	0.289	131	10	92	41	128	29
102939	ENSG00000174384	PMS2P6	chr7	+	73095934	73096047	73095681	73095768	73097383	73097567	102939	2	5	8	0	4	0	1	1	0	1	22	3	262	150	4.85423e-08	1.08575e-05	1.0,0.417,1.0	0.364,0.025,0.0	0.676	2	2	9	23	8	3
103105	ENSG00000006756	ARSD	chrX	-	2915555	2915692	2913613	2914773	2917803	2918227	103105	31	10	31	0	2	1	3	7	41	4	2	10	286	150	6.45587e-05	0.0042351	1.0,0.724,0.942	0.282,0.647,0.683	0.351	31	7	12	9	32	51
103590	ENSG00000146067	FAM193B	chr5	-	177547167	177547228	177538904	177539042	177553167	177553266	103590	32	26	52	2	5	13	11	18	16	5	9	30	210	150	0.000333511	0.0147459	0.92,0.788,0.741	0.611,0.588,0.276	0.325	34	16	31	27	65	46
104280	ENSG00000184465	WDR27	chr6	-	169689126	169689308	169688816	169689012	169701550	169701930	104280	73	69	91	16	5	14	25	57	85	19	21	26	300	150	0.000727204	0.0265594	0.695,0.873,0.765	0.397,0.576,0.62	0.247	89	44	74	78	105	111
104957	ENSG00000224184	MIR3681HG	chr2	+	12106817	12106951	12007746	12007843	12131305	12131548	104957	139	127	137	0	0	69	33	89	67	27	44	51	283	150	8.63843e-08	1.78085e-05	1.0,1.0,0.513	0.393,0.517,0.41	0.398	139	60	127	133	206	118
105555	ENSG00000126001	CEP250	chr20	+	35458303	35458374	35455174	35455237	35459982	35460105	105555	36	30	28	6	0	2	9	28	32	6	12	7	220	150	0.000475864	0.0192612	0.804,1.0,0.905	0.506,0.614,0.757	0.277	42	15	30	40	30	39
105741	ENSG00000073849	ST6GAL1	chr3	+	186996547	186996673	186963784	186963926	187038741	187038873	105741	490	422	574	211	248	310	161	253	561	236	490	834	275	150	0	0	0.559,0.481,0.502	0.271,0.22,0.268	0.261	701	397	670	743	884	1395
105743	ENSG00000073849	ST6GAL1	chr3	+	187038391	187038491	186930778	186930834	187038741	187038873	105743	20	6	38	10	4	5	1	1	6	4	1	18	249	150	3.75862e-05	0.00281458	0.546,0.475,0.821	0.131,0.376,0.167	0.389	30	5	10	2	43	24
106148	ENSG00000189223	PAX8-AS1	chr2	+	113238089	113238212	113235526	113235570	113250766	113250906	106148	12	10	27	0	0	0	4	3	6	3	2	0	272	150	0.00123719	0.0392508	1.0,1.0,1.0	0.424,0.453,1.0	0.374	12	7	10	5	27	6
106575	ENSG00000137522	RNF121	chr11	+	71962151	71962289	71960749	71960891	71982806	71982915	106575	54	59	54	30	26	25	0	18	14	11	22	32	287	150	3.36978e-06	0.000406532	0.485,0.543,0.53	0.0,0.3,0.186	0.357	84	11	85	40	79	46
106577	ENSG00000137522	RNF121	chr11	+	71962151	71962289	71960749	71960891	71990596	71990717	106577	50	60	53	40	23	44	0	17	13	25	44	45	287	150	1.14983e-09	3.73566e-07	0.395,0.577,0.386	0.0,0.168,0.131	0.353	90	25	83	61	97	58
107133	ENSG00000087884	AAMDC	chr11	+	77841018	77841060	77821186	77821237	77842478	77842628	107133	43	35	27	0	0	0	8	33	43	3	2	15	191	150	2.07514e-08	5.17098e-06	1.0,1.0,1.0	0.677,0.928,0.692	0.234	43	11	35	35	27	58
108008	ENSG00000276291	FRG1HP	chr9	+	41008880	41009006	40994632	40994699	41011616	41011730	108008	160	148	229	0	0	0	48	61	151	2	25	29	275	150	1.22125e-15	1.05361e-12	1.0,1.0,1.0	0.929,0.571,0.74	0.253	160	50	148	86	229	180
108365	ENSG00000137075	RNF38	chr9	-	36390466	36390616	36375933	36376127	36424612	36424683	108365	200	183	238	1	69	85	70	128	176	46	64	104	299	150	0.000514046	0.0202745	0.99,0.571,0.584	0.433,0.501,0.459	0.251	201	116	252	192	323	280
109739	ENSG00000102606	ARHGEF7	chr13	+	111159026	111159089	111153904	111153991	111209871	111210002	109739	7	7	8	12	2	14	0	3	5	14	20	23	212	150	0.000491961	0.0196755	0.292,0.712,0.288	0.0,0.096,0.133	0.354	19	14	9	23	22	28
110880	ENSG00000159588	CCDC17	chr1	-	45621637	45621735	45621280	45621484	45622240	45622348	110880	2	5	2	0	0	0	0	2	4	2	3	0	247	150	0.00013633	0.00746205	1.0,1.0,1.0	0.0,0.288,1.0	0.571	2	2	5	5	2	4
111034	ENSG00000105559	PLEKHA4	chr19	-	48839204	48839263	48838016	48838129	48841148	48841310	111034	98	65	99	22	27	37	5	39	33	9	29	35	208	150	8.10481e-05	0.00503001	0.763,0.635,0.659	0.286,0.492,0.405	0.291	120	14	92	68	136	68
111421	ENSG00000148950	IMMP1L	chr11	-	31473723	31473786	31469739	31469797	31509518	31509594	111421	14	21	24	1	9	9	14	9	20	12	18	18	212	150	0.0013542	0.0420284	0.908,0.623,0.654	0.452,0.261,0.44	0.344	15	26	30	27	33	38
112536	ENSG00000173915	ATP5MD	chr10	-	103394198	103394394	103392370	103392466	103395745	103396032	112536	295	207	281	358	356	461	11	25	54	173	406	588	300	150	0	0	0.292,0.225,0.234	0.031,0.03,0.044	0.215	653	184	563	431	742	642
113672	ENSG00000206149	HERC2P9	chr15	+	28655494	28655691	28655272	28655420	28655795	28656026	113672	71	62	69	23	27	39	26	34	53	23	37	66	300	150	1.28234e-05	0.0012045	0.607,0.534,0.469	0.361,0.315,0.286	0.216	94	49	89	71	108	119
113777	ENSG00000176261	ZBTB8OS	chr1	-	32632207	32632345	32631826	32631879	32634767	32634792	113777	16	15	16	0	2	9	3	0	8	3	2	17	287	150	8.65418e-05	0.0053012	1.0,0.797,0.482	0.343,0.0,0.197	0.58	16	6	17	2	25	25
113872	ENSG00000197548	ATG7	chr3	+	11282192	11282438	11272402	11272430	11288645	11288740	113872	9	8	13	0	0	0	4	9	10	4	0	2	300	150	0.000371142	0.0159829	1.0,1.0,1.0	0.333,1.0,0.714	0.318	9	8	8	9	13	12
114607	ENSG00000124370	MCEE	chr2	-	71110762	71110858	71109813	71110122	71116772	71116894	114607	17	10	6	0	0	0	0	4	5	2	3	1	245	150	8.8668e-06	0.000895974	1.0,1.0,1.0	0.0,0.449,0.754	0.599	17	2	10	7	6	6
114810	ENSG00000090615	GOLGA3	chr12	-	132827807	132827902	132827606	132827713	132828802	132828858	114810	34	30	35	0	0	0	9	20	49	2	4	12	244	150	1.26273e-09	4.05119e-07	1.0,1.0,1.0	0.734,0.755,0.715	0.265	34	11	30	24	35	61
115323	ENSG00000224699	LAMTOR5-AS1	chr1	+	110412172	110412293	110408604	110409158	110416008	110416188	115323	45	16	32	0	0	0	2	14	17	4	2	2	270	150	4.03156e-06	0.000469274	1.0,1.0,1.0	0.217,0.795,0.825	0.388	45	6	16	16	32	19
116137	ENSG00000257621	PSMA3-AS1	chr14	-	58293765	58295811	58293065	58293138	58297954	58298120	116137	38	27	51	13	10	28	7	11	19	8	10	24	300	150	0.000926536	0.0318137	0.594,0.574,0.477	0.304,0.355,0.284	0.234	51	15	37	21	79	43
116514	ENSG00000135164	DMTF1	chr7	+	87154389	87154528	87152435	87152555	87163238	87163332	116514	18	28	43	0	6	16	14	16	28	10	22	27	288	150	0.000165986	0.00866782	1.0,0.709,0.583	0.422,0.275,0.351	0.415	18	24	34	38	59	55
116556	ENSG00000079150	FKBP7	chr2	-	178469651	178469782	178465769	178465931	178478278	178478317	116556	116	96	135	1	7	2	9	69	108	8	4	13	280	150	0.000702929	0.0259218	0.984,0.88,0.973	0.376,0.902,0.817	0.247	117	17	103	73	137	121
116786	ENSG00000107362	ABHD17B	chr9	-	71866798	71867006	71862451	71862607	71874613	71875083	116786	6	10	16	0	2	0	6	11	9	4	2	2	300	150	0.00037511	0.0160998	1.0,0.714,1.0	0.429,0.733,0.692	0.287	6	10	12	13	16	11
117037	ENSG00000125503	PPP1R12C	chr19	-	55103408	55103568	55096261	55096335	55117222	55117413	117037	29	21	15	2	0	0	6	12	20	0	3	11	300	150	7.96014e-05	0.00497447	0.879,1.0,1.0	1.0,0.667,0.476	0.245	31	6	21	15	15	31
117595	ENSG00000185215	TNFAIP2	chr14	+	103124374	103124506	103123460	103123951	103126309	103126575	117595	219	180	242	210	187	209	3	22	30	27	71	87	281	150	1.44806e-12	8.64334e-10	0.358,0.339,0.382	0.056,0.142,0.155	0.242	429	30	367	93	451	117
118076	ENSG00000137210	TMEM14B	chr6	+	10751132	10751234	10749201	10749268	10756466	10756615	118076	8	8	18	2	0	0	1	20	18	6	8	2	251	150	0.000102066	0.0059878	0.705,1.0,1.0	0.091,0.599,0.843	0.391	10	7	8	28	18	20
118285	ENSG00000183621	ZNF438	chr10	-	30984368	30984426	30941574	30941651	31031832	31031937	118285	21	6	17	0	0	2	0	7	9	4	7	3	207	150	5.72453e-07	9.1401e-05	1.0,1.0,0.86	0.0,0.42,0.685	0.585	21	4	6	14	19	12
118380	ENSG00000160221	GATD3A	chr21	+	44134101	44134154	44133604	44133838	44136059	44136173	118380	26	23	118	0	5	2	4	11	20	1	33	26	202	150	1.33795e-08	3.4687e-06	1.0,0.774,0.978	0.748,0.198,0.364	0.481	26	5	28	44	120	46
118602	ENSG00000173890	GPR160	chr3	+	170077122	170077923	170062432	170062992	170079773	170079897	118602	27	16	14	0	1	2	0	23	46	5	4	6	300	150	0.000554829	0.0215193	1.0,0.889,0.778	0.0,0.742,0.793	0.377	27	5	17	27	16	52
118667	ENSG00000162894	FCMR	chr1	-	206909724	206909868	206904385	206905147	206912928	206913042	118667	100	124	129	20	10	9	18	42	67	12	12	18	293	150	0.000491141	0.0196657	0.719,0.864,0.88	0.434,0.642,0.656	0.244	120	30	134	54	138	85
119124	ENSG00000099290	WASHC2A	chr10	+	50099977	50100064	50097674	50097802	50104041	50104143	119124	181	133	169	66	54	46	22	91	113	31	71	99	236	150	1.16625e-07	2.30699e-05	0.635,0.61,0.7	0.311,0.449,0.42	0.255	247	53	187	162	215	212
119157	ENSG00000154134	ROBO3	chr11	+	124878297	124878436	124877518	124877658	124878583	124878713	119157	3	2	1	0	0	1	3	6	2	4	2	1	288	150	0.000145995	0.00784333	1.0,1.0,0.342	0.281,0.61,0.51	0.314	3	7	2	8	2	3
120250	ENSG00000170906	NDUFA3	chr19	+	54105596	54105703	54102727	54102888	54105933	54106011	120250	45	43	90	4	4	3	11	29	67	4	8	12	256	150	0.000499973	0.0199107	0.868,0.863,0.946	0.617,0.68,0.766	0.205	49	15	47	37	93	79
120928	ENSG00000126653	NSRP1	chr17	+	30163066	30163162	30156539	30156662	30172541	30172598	120928	10	7	20	10	3	9	2	0	4	6	5	8	245	150	0.000375782	0.0161084	0.38,0.588,0.576	0.169,0.0,0.234	0.38	20	8	10	5	29	12
121189	ENSG00000196998	WDR45	chrX	-	49076190	49076275	49075938	49075978	49076429	49076524	121189	9	10	8	17	7	16	0	0	0	11	13	33	234	150	2.81559e-11	1.27904e-08	0.253,0.478,0.243	0.0,0.0,0.0	0.325	26	11	17	13	24	33
121689	ENSG00000138443	ABI2	chr2	+	203351554	203351678	203328281	203328631	203355153	203355324	121689	4	3	3	16	2	13	0	0	0	4	8	7	273	150	6.30508e-05	0.00416388	0.121,0.452,0.113	0.0,0.0,0.0	0.229	20	4	5	8	16	7
121887	ENSG00000285756	BX890604.2	chrX	-	3822072	3822285	3818656	3818703	3822373	3822580	121887	47	11	31	24	7	21	4	9	19	8	15	27	300	150	0.000472491	0.0191738	0.495,0.44,0.425	0.2,0.231,0.26	0.223	71	12	18	24	52	46
121945	ENSG00000037749	MFAP3	chr5	+	154121717	154121897	154097022	154097271	154134844	154134916	121945	8	6	11	1	0	0	2	3	7	0	2	3	300	150	0.00150938	0.0455899	0.8,1.0,1.0	1.0,0.429,0.538	0.278	9	2	6	5	11	10
121957	ENSG00000198040	ZNF84	chr12	+	133038874	133039012	133037529	133037554	133041277	133041482	121957	25	17	22	13	9	10	0	4	18	4	13	25	287	150	0.000124592	0.00696691	0.501,0.497,0.535	0.0,0.139,0.273	0.374	38	4	26	17	32	43
122391	ENSG00000147586	MRPS28	chr8	-	80028694	80028796	80002998	80003180	80029760	80029912	122391	37	24	50	7	4	11	11	33	28	8	16	15	251	150	0.000902766	0.0311538	0.76,0.782,0.731	0.451,0.552,0.527	0.248	44	19	28	49	61	43
19	ENSG00000170946	DNAJC24	chr11	+	31407455	31407543	31370715	31370859	31408109	31408175	19	0	2	0	14	6	12	2	3	4	0	8	0	237	150	3.97512e-06	0.000463507	0.0,0.174,0.0	1.0,0.192,1.0	-0.673	14	2	8	11	12	4
211	ENSG00000125952	MAX	chr14	-	65077562	65077643	65077384	65077428	65077912	65078036	211	0	0	0	17	11	25	4	11	17	0	4	6	230	150	2.22045e-16	2.03538e-13	0.0,0.0,0.0	1.0,0.642,0.649	-0.764	17	4	11	15	25	23
820	ENSG00000168026	TTC21A	chr3	+	39126260	39126390	39125331	39125532	39128330	39128488	820	13	14	11	2	3	5	5	8	12	0	1	0	279	150	3.21121e-05	0.002475	0.778,0.715,0.542	1.0,0.811,1.0	-0.259	15	5	17	9	16	12
2339	ENSG00000160285	LSS	chr21	-	46221853	46221975	46216388	46216524	46228433	46228599	2339	14	10	15	4	0	5	2	2	8	0	0	0	271	150	7.26559e-06	0.000762129	0.66,1.0,0.624	1.0,1.0,1.0	-0.239	18	2	10	2	20	8
2718	ENSG00000023902	PLEKHO1	chr1	+	150156910	150157015	150150606	150151058	150158818	150159630	2718	1	0	11	1	2	2	4	5	15	0	0	0	254	150	0.000231565	0.01113	0.371,0.0,0.765	1.0,1.0,1.0	-0.621	2	4	2	5	13	15
2820	ENSG00000275066	SYNRG	chr17	-	37529782	37529851	37520537	37520648	37538323	37538420	2820	0	2	4	8	6	13	3	3	9	0	1	8	218	150	0.000448965	0.0184225	0.0,0.187,0.175	1.0,0.674,0.436	-0.583	8	3	8	4	17	17
2821	ENSG00000275066	SYNRG	chr17	-	37529782	37529851	37520537	37520648	37539191	37539245	2821	0	2	4	5	6	15	3	3	9	0	1	5	218	150	7.00769e-05	0.00452197	0.0,0.187,0.155	1.0,0.674,0.553	-0.628	5	3	8	4	19	14
3088	ENSG00000205133	TRIQK	chr8	-	92921502	92921660	92891988	92892074	92954405	92954564	3088	19	23	21	1	3	9	2	8	2	0	0	0	300	150	1.90408e-06	0.000255868	0.905,0.793,0.538	1.0,1.0,1.0	-0.255	20	2	26	8	30	2
3125	ENSG00000169062	UPF3A	chr13	+	114286518	114286629	114281952	114282127	114298839	114299000	3125	34	41	23	12	0	10	38	56	86	0	0	7	260	150	0.00148659	0.0451016	0.62,1.0,0.57	1.0,1.0,0.876	-0.229	46	38	41	56	33	93
3171	ENSG00000083454	P2RX5	chr17	-	3676178	3676326	3672198	3672493	3679589	3679784	3171	3	4	2	17	21	13	6	14	25	0	5	20	297	150	4.74751e-06	0.00053254	0.082,0.088,0.072	1.0,0.586,0.387	-0.577	20	6	25	19	15	45
3700	ENSG00000170638	TRABD	chr22	+	50197448	50197588	50194899	50195040	50198074	50198186	3700	16	15	24	8	3	19	14	28	48	0	3	1	289	150	5.48583e-07	8.85538e-05	0.509,0.722,0.396	1.0,0.829,0.961	-0.388	24	14	18	31	43	49
4195	ENSG00000184574	LPAR5	chr12	-	6631584	6631671	6620432	6621464	6635906	6635960	4195	18	19	32	30	16	39	77	131	146	23	40	40	236	150	6.37813e-10	2.2197e-07	0.276,0.43,0.343	0.68,0.675,0.699	-0.335	48	100	35	171	71	186
4550	ENSG00000055208	TAB2	chr6	+	149342684	149342833	149318581	149318782	149369908	149370075	4550	66	27	61	9	4	14	12	45	37	0	1	2	298	150	1.81617e-05	0.00158687	0.787,0.773,0.687	1.0,0.958,0.903	-0.205	75	12	31	46	75	39
4621	ENSG00000161958	FGF11	chr17	+	7442593	7442792	7441775	7441879	7443075	7443331	4621	181	87	192	30	26	39	33	13	45	0	2	0	300	150	1.70735e-07	3.187e-05	0.751,0.626,0.711	1.0,0.765,1.0	-0.226	211	33	113	15	231	45
4888	ENSG00000138386	NAB1	chr2	+	190655976	190656159	190653730	190653780	190659157	190659995	4888	23	12	18	2	6	4	2	18	34	0	1	1	300	150	6.76749e-05	0.00439737	0.852,0.5,0.692	1.0,0.9,0.944	-0.267	25	2	18	19	22	35
5323	ENSG00000069956	MAPK6	chr15	+	52042753	52042833	52027638	52027873	52045829	52046109	5323	13	25	33	8	11	15	23	26	30	1	7	2	229	150	0.000407589	0.0171076	0.516,0.598,0.59	0.938,0.709,0.908	-0.284	21	24	36	33	48	32
6066	ENSG00000147996	CBWD5	chr9	+	65690966	65691026	65682765	65682857	65692570	65692608	6066	95	81	172	39	13	13	52	183	259	0	0	2	209	150	5.55112e-16	4.91298e-13	0.636,0.817,0.905	1.0,1.0,0.989	-0.21	134	52	94	183	185	261
6369	ENSG00000149548	CCDC15	chr11	+	124991460	124991583	124987126	124988134	124992579	124992687	6369	24	30	32	33	17	27	19	61	82	6	10	36	272	150	0.000587393	0.0224934	0.286,0.493,0.395	0.636,0.771,0.557	-0.263	57	25	47	71	59	118
6606	ENSG00000106603	COA1	chr7	-	43656032	43656153	43648599	43648652	43665657	43665722	6606	45	40	49	53	54	48	33	83	65	21	12	36	270	150	0.000634793	0.0239257	0.321,0.292,0.362	0.466,0.793,0.501	-0.262	98	54	94	95	97	101
6609	ENSG00000106603	COA1	chr7	-	43656032	43656153	43650611	43650712	43665657	43665722	6609	60	56	86	17	21	37	23	89	131	0	8	11	270	150	2.64092e-08	6.43367e-06	0.662,0.597,0.564	1.0,0.861,0.869	-0.302	77	23	77	97	123	142
7128	ENSG00000156411	ATP5MPL	chr14	-	103920939	103921208	103913960	103913984	103921469	103921501	7128	39	23	38	20	31	29	26	35	68	0	7	22	300	150	0.000239632	0.0114056	0.494,0.271,0.396	1.0,0.714,0.607	-0.387	59	26	54	42	67	90
7486	ENSG00000221887	HMSD	chr18	+	63953353	63953527	63949300	63949400	63954407	63954557	7486	545	422	600	512	377	558	392	734	1001	0	0	0	300	150	0	0	0.347,0.359,0.35	1.0,1.0,1.0	-0.648	1057	392	799	734	1158	1001
7766	ENSG00000154265	ABCA5	chr17	-	69325698	69325817	69317704	69317823	69327051	69327111	7766	15	12	13	4	5	5	3	7	10	0	0	0	268	150	4.91074e-08	1.09362e-05	0.677,0.573,0.593	1.0,1.0,1.0	-0.386	19	3	17	7	18	10
7934	ENSG00000078369	GNB1	chr1	-	1806474	1806538	1793244	1793311	1825396	1825499	7934	0	8	0	3	0	6	2	2	2	0	0	0	213	150	2.06109e-07	3.7518e-05	0.0,1.0,0.0	1.0,1.0,1.0	-0.667	3	2	8	2	6	2
8026	ENSG00000105372	RPS19	chr19	+	41863870	41863985	41861111	41861212	41864173	41864899	8026	12	7	29	4	3	14	8	8	18	1	0	2	264	150	0.000173331	0.00896022	0.63,0.57,0.541	0.82,1.0,0.836	-0.305	16	9	10	8	43	20
9174	ENSG00000131089	ARHGEF9	chrX	-	63754303	63754676	63724531	63724711	63754920	63755123	9174	33	46	55	29	24	21	26	35	88	0	4	24	300	150	0.000378428	0.016188	0.363,0.489,0.567	1.0,0.814,0.647	-0.347	62	26	70	39	76	112
9620	ENSG00000105193	RPS16	chr19	-	39433493	39433569	39433206	39433418	39435606	39435708	9620	35	11	47	8	13	6	11	81	160	4	4	2	225	150	0.000862699	0.0301358	0.745,0.361,0.839	0.647,0.931,0.982	-0.205	43	15	24	85	53	162
9622	ENSG00000105193	RPS16	chr19	-	39433517	39433569	39433259	39433418	39435606	39435705	9622	1	3	6	8	13	6	1	49	106	4	4	2	201	150	0.000259439	0.012107	0.085,0.147,0.427	0.157,0.901,0.975	-0.458	9	5	16	53	12	108
10403	ENSG00000079263	SP140	chr2	+	230243730	230243811	230241403	230241487	230244987	230245071	10403	616	437	684	328	254	368	156	360	643	0	6	2	230	150	0	0	0.551,0.529,0.548	1.0,0.975,0.995	-0.447	944	156	691	366	1052	645
10891	ENSG00000166321	NUDT13	chr10	+	73125397	73125509	73125117	73125243	73126634	73126657	10891	28	11	11	10	4	7	3	8	18	0	1	0	261	150	5.03433e-07	8.21701e-05	0.617,0.612,0.475	1.0,0.821,1.0	-0.372	38	3	15	9	18	18
11076	ENSG00000121281	ADCY7	chr16	+	50287911	50288350	50274152	50274198	50292675	50292825	11076	26	1	23	0	4	4	16	35	34	0	0	0	300	150	0.00014374	0.0077587	1.0,0.111,0.742	1.0,1.0,1.0	-0.382	26	16	5	35	27	34
11549	ENSG00000140299	BNIP2	chr15	-	59668102	59668138	59663378	59664120	59669275	59669362	11549	11	8	19	4	2	4	3	21	29	0	0	0	185	150	1.12671e-06	0.00016596	0.69,0.764,0.794	1.0,1.0,1.0	-0.251	15	3	10	21	23	29
12097	ENSG00000104490	NCALD	chr8	-	101779923	101779979	101719385	101719648	101852571	101852670	12097	10	3	10	0	4	4	8	28	36	0	0	0	205	150	1.84835e-05	0.00160814	1.0,0.354,0.647	1.0,1.0,1.0	-0.333	10	8	7	28	14	36
12113	ENSG00000104490	NCALD	chr8	-	101887140	101887227	101719251	101719648	101915808	101915858	12113	0	0	0	47	32	55	83	235	336	11	53	93	236	150	0	0	0.0,0.0,0.0	0.827,0.738,0.697	-0.754	47	94	32	288	55	429
12115	ENSG00000104490	NCALD	chr8	-	101887140	101887227	101779923	101779979	101915808	101915858	12115	0	0	0	18	9	19	50	141	190	0	34	24	236	150	0	0	0.0,0.0,0.0	1.0,0.725,0.834	-0.853	18	50	9	175	19	214
12276	ENSG00000276087	AC008073.3	chr2	+	24139369	24139450	24135118	24135187	24146747	24146835	12276	15	6	15	10	3	15	4	20	22	0	3	0	230	150	1.20535e-07	2.35216e-05	0.495,0.566,0.395	1.0,0.813,1.0	-0.452	25	4	9	23	30	22
12807	ENSG00000167491	GATAD2A	chr19	+	19436130	19436219	19385825	19386138	19465344	19465614	12807	87	40	106	110	105	154	72	115	183	47	136	66	238	150	0.000652652	0.0245348	0.333,0.194,0.303	0.491,0.348,0.636	-0.215	197	119	145	251	260	249
13192	ENSG00000188976	NOC2L	chr1	-	946401	946545	945517	945653	948489	948603	13192	2	0	4	2	7	4	2	10	8	1	2	2	293	150	0.000368439	0.0158798	0.339,0.0,0.339	0.506,0.719,0.672	-0.406	4	3	7	12	8	10
13378	ENSG00000149091	DGKZ	chr11	+	46366243	46366984	46345436	46345585	46367290	46367399	13378	84	56	65	203	213	210	54	121	201	60	79	126	300	150	1.11022e-16	1.02686e-13	0.171,0.116,0.134	0.31,0.434,0.444	-0.256	287	114	269	200	275	327
14050	ENSG00000204604	ZNF468	chr19	-	52853871	52854107	52849086	52849213	52854257	52854345	14050	30	18	18	98	87	92	14	39	72	19	30	54	300	150	1.79745e-12	1.0485e-09	0.133,0.094,0.089	0.269,0.394,0.4	-0.249	128	33	105	69	110	126
14051	ENSG00000204604	ZNF468	chr19	-	52853871	52854126	52849086	52849213	52854257	52854345	14051	35	19	26	98	87	92	17	67	102	19	30	54	300	150	4.58134e-12	2.44162e-09	0.152,0.098,0.124	0.309,0.528,0.486	-0.316	133	36	106	97	118	156
14398	ENSG00000183077	AFMID	chr17	+	78204827	78204900	78202702	78202751	78205439	78205518	14398	17	14	17	6	8	10	22	50	80	0	5	9	222	150	9.95663e-06	0.000978179	0.657,0.542,0.535	1.0,0.871,0.857	-0.331	23	22	22	55	27	89
14400	ENSG00000183077	AFMID	chr17	+	78204827	78204900	78202702	78202751	78206910	78207405	14400	17	12	11	52	27	57	12	44	68	12	35	59	222	150	5.95306e-09	1.66079e-06	0.181,0.231,0.115	0.403,0.459,0.438	-0.258	69	24	39	79	68	127
14545	ENSG00000269001	AC092070.2	chr19	+	53200623	53200703	53197110	53197262	53204015	53204055	14545	32	18	21	10	3	18	14	68	58	0	0	0	229	150	1.49691e-12	8.83222e-10	0.677,0.797,0.433	1.0,1.0,1.0	-0.364	42	14	21	68	39	58
14638	ENSG00000254521	SIGLEC12	chr19	-	51497348	51497445	51496879	51496976	51498017	51498287	14638	11	1	5	2	2	2	4	2	9	0	0	0	246	150	7.46614e-05	0.0047508	0.77,0.234,0.604	1.0,1.0,1.0	-0.464	13	4	3	2	7	9
14968	ENSG00000215769	ARHGAP27P1-BPTFP1-KPNA2P3	chr17	-	64779980	64780205	64764450	64764548	64780342	64781039	14968	10	13	16	0	3	4	2	12	13	0	0	0	300	150	8.40259e-05	0.00516558	1.0,0.684,0.667	1.0,1.0,1.0	-0.216	10	2	16	12	20	13
15435	ENSG00000215790	SLC35E2A	chr1	-	1744250	1744668	1739235	1739704	1745723	1745919	15435	79	68	83	28	15	30	16	63	93	0	0	0	300	150	0	0	0.585,0.694,0.58	1.0,1.0,1.0	-0.38	107	16	83	63	113	93
16336	ENSG00000241878	PISD	chr22	-	31628852	31628981	31628002	31628210	31630803	31630862	16336	10	9	26	6	1	2	8	25	15	0	1	0	278	150	4.3892e-05	0.00314677	0.473,0.829,0.875	1.0,0.931,1.0	-0.251	16	8	10	26	28	15
17511	ENSG00000169031	COL4A3	chr2	+	227256025	227256070	227254655	227254715	227256342	227256396	17511	18	6	2	2	1	4	37	67	110	0	0	2	194	150	0.000168458	0.00877461	0.874,0.823,0.279	1.0,1.0,0.977	-0.334	20	37	7	67	6	112
18357	ENSG00000186638	KIF24	chr9	-	34297016	34297114	34286616	34286704	34306251	34306441	18357	19	37	41	5	7	3	7	40	63	0	0	0	247	150	1.09176e-07	2.18065e-05	0.698,0.762,0.892	1.0,1.0,1.0	-0.216	24	7	44	40	44	63
18444	ENSG00000197134	ZNF257	chr19	+	22060507	22060628	22052451	22052635	22072808	22072935	18444	1	2	0	5	3	7	13	29	59	19	32	55	270	150	8.98592e-05	0.00546528	0.1,0.27,0.0	0.275,0.335,0.373	-0.204	6	32	5	61	7	114
20583	ENSG00000080822	CLDND1	chr3	-	98521652	98521696	98521132	98521437	98522848	98522955	20583	0	0	0	14	29	18	8	0	5	4	7	18	193	150	1.16319e-05	0.00111503	0.0,0.0,0.0	0.609,0.0,0.178	-0.262	14	12	29	7	18	23
20588	ENSG00000080822	CLDND1	chr3	-	98521652	98521703	98521132	98521437	98522848	98522875	20588	0	0	0	14	29	18	8	0	5	4	7	18	200	150	1.21512e-05	0.00115756	0.0,0.0,0.0	0.6,0.0,0.172	-0.257	14	12	29	7	18	23
20593	ENSG00000080822	CLDND1	chr3	-	98521652	98521718	98521132	98521437	98522848	98522922	20593	0	0	0	14	29	18	8	0	5	4	7	18	215	150	1.32563e-05	0.00123499	0.0,0.0,0.0	0.583,0.0,0.162	-0.248	14	12	29	7	18	23
20698	ENSG00000112290	WASF1	chr6	-	110178597	110178742	110160634	110160732	110179438	110179649	20698	34	27	62	10	10	15	11	51	74	2	6	2	294	150	0.000299908	0.0135282	0.634,0.579,0.678	0.737,0.813,0.95	-0.203	44	13	37	57	77	76
20892	ENSG00000143643	TTC13	chr1	-	230940439	230940556	230933778	230933861	230954332	230954403	20892	66	83	78	13	22	18	32	53	95	0	0	3	266	150	2.95497e-12	1.66688e-09	0.741,0.68,0.71	1.0,1.0,0.947	-0.272	79	32	105	53	96	98
20917	ENSG00000074621	SLC24A1	chr15	+	65652641	65652808	65651669	65651759	65660278	65660338	20917	24	15	28	13	5	0	3	7	21	0	0	0	300	150	1.26407e-06	0.000181797	0.48,0.6,1.0	1.0,1.0,1.0	-0.307	37	3	20	7	28	21
20948	ENSG00000164181	ELOVL7	chr5	-	60799179	60799230	60787333	60787431	60844159	60844215	20948	47	31	52	5	5	21	2	15	14	0	0	0	200	150	5.87526e-07	9.32277e-05	0.876,0.823,0.65	1.0,1.0,1.0	-0.217	52	2	36	15	73	14
21344	ENSG00000105926	MPP6	chr7	+	24620051	24620220	24597119	24597191	24623665	24623784	21344	0	2	0	4	8	6	2	1	7	0	2	1	300	150	2.14805e-05	0.00180911	0.0,0.111,0.0	1.0,0.2,0.778	-0.622	4	2	10	3	6	8
22380	ENSG00000179715	PCED1B	chr12	+	47223527	47223672	47216597	47216689	47235006	47235565	22380	2	6	8	52	50	50	8	27	30	8	37	69	294	150	9.27611e-09	2.50614e-06	0.019,0.058,0.075	0.338,0.271,0.182	-0.213	54	16	56	64	58	99
22581	ENSG00000270629	NBPF14	chr1	-	148584470	148584676	148583140	148583192	148585140	148585213	22581	55	32	58	19	3	7	36	25	59	0	0	0	300	150	1.02994e-09	3.41092e-07	0.591,0.842,0.806	1.0,1.0,1.0	-0.254	74	36	35	25	65	59
22844	ENSG00000178852	EFCAB13	chr17	+	47347807	47347951	47345015	47345098	47370436	47370508	22844	0	0	0	10	9	14	2	4	7	1	5	19	293	150	1.49661e-06	0.000209332	0.0,0.0,0.0	0.506,0.291,0.159	-0.319	10	3	9	9	14	26
22988	ENSG00000158062	UBXN11	chr1	-	26303042	26303167	26302812	26302918	26306287	26306576	22988	17	16	23	11	2	4	4	17	19	0	1	1	274	150	6.40077e-05	0.00420701	0.458,0.814,0.759	1.0,0.903,0.912	-0.261	28	4	18	18	27	20
23334	ENSG00000175106	TVP23C	chr17	-	15540432	15540561	15516418	15516659	15545784	15545916	23334	37	38	35	6	9	3	5	3	6	0	0	0	278	150	5.54596e-06	0.000610292	0.769,0.695,0.863	1.0,1.0,1.0	-0.224	43	5	47	3	38	6
24332	ENSG00000196118	CCDC189	chr16	-	30759011	30759101	30757422	30757654	30759341	30759444	24332	7	7	16	6	2	1	6	5	26	0	0	2	239	150	0.000410952	0.017199	0.423,0.687,0.909	1.0,1.0,0.891	-0.291	13	6	9	5	17	28
25138	ENSG00000163468	CCT3	chr1	-	156333215	156333284	156324971	156325086	156333546	156333643	25138	3	2	3	18	10	24	6	14	18	7	19	30	218	150	4.46878e-05	0.00318995	0.103,0.121,0.079	0.371,0.336,0.292	-0.232	21	13	12	33	27	48
25545	ENSG00000197363	ZNF517	chr8	+	144807190	144808486	144804124	144804238	144810105	144811169	25545	22	18	19	2	3	15	7	27	45	0	0	3	300	150	9.84108e-05	0.00584009	0.846,0.75,0.388	1.0,1.0,0.882	-0.299	24	7	21	27	34	48
25850	ENSG00000124785	NRN1	chr6	-	6003168	6003273	6002352	6002497	6003702	6004044	25850	10	4	7	6	10	11	3	31	46	0	17	3	254	150	0.000780933	0.0279841	0.496,0.191,0.273	1.0,0.519,0.901	-0.487	16	3	14	48	18	49
25851	ENSG00000124785	NRN1	chr6	-	6003168	6003273	6002352	6002497	6006694	6006967	25851	7	2	7	28	21	37	3	31	48	19	22	39	254	150	0.000410239	0.0171788	0.129,0.053,0.1	0.085,0.454,0.421	-0.226	35	22	23	53	44	87
25875	ENSG00000143486	EIF2D	chr1	-	206602950	206603204	206600262	206600308	206608235	206608326	25875	25	15	19	10	9	9	9	19	27	2	0	3	300	150	0.000222618	0.010796	0.556,0.455,0.514	0.692,1.0,0.818	-0.328	35	11	24	19	28	30
26018	ENSG00000125726	CD70	chr19	-	6592415	6592575	6586153	6586405	6603940	6604103	26018	6	4	3	13	11	10	2	18	4	1	5	1	300	150	1.11918e-05	0.00107888	0.188,0.154,0.13	0.5,0.643,0.667	-0.446	19	3	15	23	13	5
26778	ENSG00000164961	WASHC5	chr8	-	125083712	125083776	125083112	125083258	125091614	125091819	26778	71	88	66	93	107	130	24	81	123	22	34	52	213	150	9.23592e-06	0.000924177	0.35,0.367,0.263	0.434,0.627,0.625	-0.235	164	46	195	115	196	175
26779	ENSG00000164961	WASHC5	chr8	-	125083712	125084022	125083112	125083258	125091614	125091840	26779	422	331	417	93	107	130	175	475	740	22	34	52	300	150	0	0	0.694,0.607,0.616	0.799,0.875,0.877	-0.211	515	197	438	509	547	792
26780	ENSG00000164961	WASHC5	chr8	-	125083834	125084022	125083112	125083258	125091614	125091790	26780	275	184	277	93	107	130	128	318	466	22	34	52	300	150	4.21885e-15	3.38381e-12	0.597,0.462,0.516	0.744,0.824,0.818	-0.27	368	150	291	352	407	518
26961	ENSG00000154889	MPPE1	chr18	-	11886498	11886621	11882621	11884627	11886916	11887025	26961	7	5	16	1	4	1	6	17	24	0	2	0	272	150	0.000600678	0.0229166	0.794,0.408,0.898	1.0,0.824,1.0	-0.241	8	6	9	19	17	24
27460	ENSG00000081320	STK17B	chr2	-	196165582	196165734	196163363	196163427	196174248	196174407	27460	7	2	6	12	28	32	2	6	12	2	7	13	300	150	0.001214	0.0386467	0.226,0.034,0.086	0.333,0.3,0.316	-0.201	19	4	30	13	38	25
28390	ENSG00000119682	AREL1	chr14	-	74698763	74698856	74692040	74692328	74701668	74701774	28390	19	13	20	4	3	6	3	11	17	0	1	0	242	150	1.32324e-05	0.00123499	0.746,0.729,0.674	1.0,0.872,1.0	-0.241	23	3	16	12	26	17
28718	ENSG00000143612	C1orf43	chr1	-	154218715	154218785	154213892	154213946	154220341	154220578	28718	2	1	0	26	28	43	2	6	10	2	18	47	219	150	1.08132e-05	0.00104829	0.05,0.024,0.0	0.407,0.186,0.127	-0.215	28	4	29	24	43	57
28744	ENSG00000130023	ERMARD	chr6	+	169776333	169776411	169775939	169776065	169779181	169779295	28744	6	0	6	28	21	24	2	19	24	9	13	31	227	150	0.000395475	0.0167501	0.124,0.0,0.142	0.128,0.491,0.338	-0.23	34	11	21	32	30	55
28802	ENSG00000135541	AHI1	chr6	-	135297431	135297492	135285294	135285647	135300499	135300532	28802	1	8	13	3	6	7	4	4	23	0	0	2	210	150	1.35312e-06	0.000192863	0.192,0.488,0.57	1.0,1.0,0.891	-0.547	4	4	14	4	20	25
28805	ENSG00000135541	AHI1	chr6	-	135301407	135301539	135300499	135300558	135318518	135318616	28805	23	19	53	51	38	48	20	26	45	2	14	24	281	150	0.000511566	0.0202203	0.194,0.211,0.371	0.842,0.498,0.5	-0.355	74	22	57	40	101	69
28806	ENSG00000135541	AHI1	chr6	-	135302711	135302817	135300499	135300558	135318518	135318616	28806	7	15	37	51	38	48	19	15	27	2	14	24	255	150	0.00164088	0.0485191	0.075,0.188,0.312	0.848,0.387,0.398	-0.353	58	21	53	29	85	51
29670	ENSG00000107099	DOCK8	chr9	+	280790	280905	273049	273100	284374	284567	29670	34	2	37	3	1	6	5	5	69	0	0	0	264	150	1.21621e-05	0.00115756	0.866,0.532,0.778	1.0,1.0,1.0	-0.275	37	5	3	5	43	69
29743	ENSG00000177302	TOP3A	chr17	-	18308412	18308424	18306890	18306966	18308881	18308941	29743	4	10	10	7	6	8	8	17	36	4	3	2	161	150	0.000534197	0.0208899	0.347,0.608,0.538	0.651,0.841,0.944	-0.314	11	12	16	20	18	38
29959	ENSG00000144843	ADPRH	chr3	+	119580484	119580636	119579432	119579851	119586284	119586363	29959	10	21	25	7	2	3	8	29	30	0	2	1	300	150	0.00132909	0.0414871	0.417,0.84,0.806	1.0,0.879,0.938	-0.251	17	8	23	31	28	31
30178	ENSG00000196756	SNHG17	chr20	-	38422091	38422241	38421005	38421098	38426418	38426503	30178	143	150	203	228	205	285	46	192	332	38	90	115	299	150	5.56914e-08	1.22432e-05	0.239,0.269,0.263	0.378,0.517,0.592	-0.239	371	84	355	282	488	447
30570	ENSG00000137992	DBT	chr1	-	100210693	100210771	100206444	100206636	100214816	100214983	30570	92	76	115	0	61	51	31	120	225	2	2	0	227	150	3.41618e-08	8.09982e-06	1.0,0.452,0.598	0.911,0.975,1.0	-0.279	92	33	137	122	166	225
31033	ENSG00000156795	WDYHV1	chr8	+	123448046	123448224	123441305	123441349	123467078	123467230	31033	12	12	16	8	2	6	12	21	30	0	0	0	300	150	5.83272e-10	2.05074e-07	0.429,0.75,0.571	1.0,1.0,1.0	-0.417	20	12	14	21	22	30
31327	ENSG00000148399	DPH7	chr9	-	137576079	137576167	137564892	137565154	137578624	137578888	31327	14	20	17	2	7	11	23	39	43	0	0	6	237	150	8.92844e-05	0.00543354	0.816,0.644,0.494	1.0,1.0,0.819	-0.288	16	23	27	39	28	49
32038	ENSG00000053747	LAMA3	chr18	+	23905521	23905624	23904552	23904694	23909152	23909295	32038	0	1	3	2	2	0	2	7	11	0	0	0	252	150	0.000230336	0.0110881	0.0,0.229,1.0	1.0,1.0,1.0	-0.59	2	2	3	7	3	11
33212	ENSG00000012124	CD22	chr19	+	35330572	35330660	35329186	35329230	35332593	35332931	33212	22	8	36	22	32	37	10	54	95	5	15	38	237	150	1.22856e-05	0.00116639	0.388,0.137,0.381	0.559,0.695,0.613	-0.32	44	15	40	69	73	133
33883	ENSG00000235513	AL035681.1	chr22	-	41213629	41214703	41209121	41209951	41217031	41217627	33883	70	31	55	5	6	9	9	6	7	0	0	0	300	150	7.03018e-06	0.000743969	0.875,0.721,0.753	1.0,1.0,1.0	-0.217	75	9	37	6	64	7
34039	ENSG00000213024	NUP62	chr19	-	49918507	49918621	49911235	49911366	49927693	49927815	34039	11	11	25	1	16	21	6	23	38	1	5	0	263	150	0.00135267	0.0420284	0.863,0.282,0.404	0.774,0.724,1.0	-0.316	12	7	27	28	46	38
34245	ENSG00000256223	ZNF10	chr12	+	133143519	133143622	133139198	133139249	133144433	133144525	34245	1	9	2	6	2	2	4	3	8	1	0	0	252	150	3.8875e-06	0.000455515	0.09,0.728,0.373	0.704,1.0,1.0	-0.504	7	5	11	3	4	8
34585	ENSG00000197889	MEIG1	chr10	+	14970247	14970546	14966439	14966606	14972512	14972681	34585	6	0	1	17	6	6	3	2	10	0	0	0	300	150	1.9984e-14	1.48671e-11	0.15,0.0,0.077	1.0,1.0,1.0	-0.924	23	3	6	2	7	10
34682	ENSG00000148985	PGAP2	chr11	+	3811249	3811424	3808460	3808651	3824269	3824364	34682	81	56	94	25	20	17	31	89	118	3	5	14	300	150	9.07947e-05	0.00550913	0.618,0.583,0.734	0.838,0.899,0.808	-0.203	106	34	76	94	111	132
34691	ENSG00000148985	PGAP2	chr11	+	3822908	3822993	3808598	3808651	3823612	3823740	34691	1	2	8	2	5	2	4	3	12	0	0	0	234	150	7.53372e-09	2.06805e-06	0.243,0.204,0.719	1.0,1.0,1.0	-0.611	3	4	7	3	10	12
34693	ENSG00000148985	PGAP2	chr11	+	3822908	3822993	3808598	3808651	3824269	3824343	34693	0	0	0	25	20	17	1	2	9	3	5	14	234	150	3.99759e-08	9.24353e-06	0.0,0.0,0.0	0.176,0.204,0.292	-0.224	25	4	20	7	17	23
34694	ENSG00000148985	PGAP2	chr11	+	3822908	3822993	3811249	3811424	3823612	3823740	34694	11	29	36	10	13	14	9	31	52	3	0	7	234	150	0.000467716	0.019017	0.414,0.588,0.622	0.658,1.0,0.826	-0.287	21	12	42	31	50	59
35225	ENSG00000179532	DNHD1	chr11	+	6520237	6520289	6519964	6520102	6528521	6528787	35225	11	18	21	6	2	8	4	15	26	0	1	1	201	150	1.81809e-05	0.0015872	0.578,0.87,0.662	1.0,0.918,0.951	-0.253	17	4	20	16	29	27
35961	ENSG00000189050	RNFT1	chr17	-	59962539	59962616	59958290	59958444	59962826	59962966	35961	34	19	22	6	2	14	8	21	47	0	0	3	226	150	4.30235e-05	0.00310719	0.79,0.863,0.511	1.0,1.0,0.912	-0.249	40	8	21	21	36	50
36314	ENSG00000166348	USP54	chr10	-	73504849	73504990	73500654	73500838	73505322	73505426	36314	36	50	35	7	7	8	31	33	49	0	1	2	290	150	4.99428e-06	0.000556114	0.727,0.787,0.694	1.0,0.945,0.927	-0.221	43	31	57	34	43	51
37487	ENSG00000167065	DUSP18	chr22	-	30664954	30665121	30663514	30664080	30666806	30667860	37487	6	6	9	7	5	11	14	28	35	1	5	4	300	150	2.9507e-07	5.10849e-05	0.3,0.375,0.29	0.875,0.737,0.814	-0.487	13	15	11	33	20	39
37488	ENSG00000167065	DUSP18	chr22	-	30664954	30665121	30663514	30664080	30667461	30667885	37488	13	7	11	77	67	79	14	39	54	18	61	65	300	150	1.47882e-13	9.92306e-11	0.078,0.05,0.065	0.28,0.242,0.293	-0.207	90	32	74	100	90	119
38210	ENSG00000228397	LINC01635	chr1	-	22024805	22024955	22023996	22024445	22025059	22025483	38210	9	8	9	4	4	1	3	4	4	0	0	0	299	150	1.31495e-07	2.53282e-05	0.53,0.501,0.819	1.0,1.0,1.0	-0.383	13	3	12	4	10	4
38275	ENSG00000103472	RRN3P2	chr16	+	29084442	29084532	29077900	29077957	29084638	29084768	38275	39	27	59	9	7	13	20	36	63	0	0	5	239	150	7.6295e-06	0.00079521	0.731,0.708,0.74	1.0,1.0,0.888	-0.236	48	20	34	36	72	68
40211	ENSG00000120942	UBIAD1	chr1	+	11293466	11293626	11273888	11274060	11294872	11295183	40211	6	2	16	7	8	5	5	3	18	0	0	0	300	150	7.48237e-11	3.11956e-08	0.3,0.111,0.615	1.0,1.0,1.0	-0.658	13	5	10	3	21	18
40275	ENSG00000168802	CHTF8	chr16	-	69120106	69120208	69118121	69118525	69121052	69121170	40275	88	57	107	54	19	37	40	80	113	6	9	22	251	150	4.02036e-05	0.00295243	0.493,0.642,0.633	0.799,0.842,0.754	-0.209	142	46	76	89	144	135
40514	ENSG00000130816	DNMT1	chr19	-	10166597	10166685	10162666	10162748	10177291	10177367	40514	0	0	3	2	3	0	4	3	5	0	0	3	237	150	0.000447193	0.0183791	0.0,0.0,1.0	1.0,1.0,0.513	-0.504	2	4	3	3	3	8
40777	ENSG00000151422	FER	chr5	+	108768092	108768238	108747821	108748000	108798123	108798389	40777	41	53	41	8	22	5	9	35	57	0	0	5	295	150	0.000121443	0.00682425	0.723,0.551,0.807	1.0,1.0,0.853	-0.257	49	9	75	35	46	62
41823	ENSG00000167380	ZNF226	chr19	+	44166704	44166882	44165587	44165807	44167818	44167860	41823	7	17	11	3	4	2	2	5	10	0	0	0	300	150	5.21541e-07	8.48558e-05	0.538,0.68,0.733	1.0,1.0,1.0	-0.35	10	2	21	5	13	10
42143	ENSG00000127419	TMEM175	chr4	+	948115	948154	932479	932540	950420	950518	42143	45	40	60	41	25	44	12	41	61	5	12	10	188	150	3.67483e-05	0.00275945	0.467,0.561,0.521	0.657,0.732,0.83	-0.223	86	17	65	53	104	71
42148	ENSG00000127419	TMEM175	chr4	+	948410	948615	948115	948154	950423	950518	42148	17	10	32	4	5	1	6	9	16	0	0	0	300	150	2.65966e-06	0.000336706	0.68,0.5,0.941	1.0,1.0,1.0	-0.293	21	6	15	9	33	16
42221	ENSG00000101557	USP14	chr18	+	162982	163174	158857	159021	163307	163431	42221	13	15	22	6	4	0	4	9	6	0	1	0	300	150	0.000225824	0.0109205	0.52,0.652,1.0	1.0,0.818,1.0	-0.215	19	4	19	10	22	6
44020	ENSG00000198794	SCAMP5	chr15	+	75007587	75007728	74995555	74995673	75011791	75011846	44020	15	11	16	80	68	101	21	83	152	8	17	57	290	150	0	0	0.088,0.077,0.076	0.576,0.716,0.58	-0.544	95	29	79	100	117	209
44022	ENSG00000198794	SCAMP5	chr15	+	75007660	75007728	74995572	74995673	75011791	75011846	44022	16	11	14	80	68	101	15	59	110	8	17	57	217	150	0	0	0.121,0.101,0.087	0.564,0.706,0.572	-0.511	96	23	79	76	115	167
44025	ENSG00000198794	SCAMP5	chr15	+	75009890	75009940	74995541	74995673	75011791	75011846	44025	2	0	7	80	68	101	5	8	13	8	17	57	199	150	2.06645e-08	5.16186e-06	0.018,0.0,0.05	0.32,0.262,0.147	-0.22	82	13	68	25	108	70
44112	ENSG00000106100	NOD1	chr7	-	30463608	30463698	30459900	30460041	30478605	30478742	44112	31	28	45	34	41	51	18	72	123	3	22	37	239	150	1.56274e-10	6.17073e-08	0.364,0.3,0.356	0.79,0.673,0.676	-0.373	65	21	69	94	96	160
44554	ENSG00000186648	CARMIL3	chr14	+	24065621	24065750	24064957	24065273	24066397	24066464	44554	9	5	7	6	1	2	3	7	9	0	0	0	278	150	6.27235e-08	1.34882e-05	0.447,0.73,0.654	1.0,1.0,1.0	-0.39	15	3	6	7	9	9
44960	ENSG00000158458	NRG2	chr5	-	139871043	139871148	139869398	139869718	139871720	139871803	44960	6	2	9	3	5	2	2	6	3	0	0	2	254	150	0.00160123	0.0476355	0.542,0.191,0.727	1.0,1.0,0.47	-0.337	9	2	7	6	11	5
45633	ENSG00000158483	FAM86C1	chr11	+	71793379	71793481	71789782	71789845	71796016	71796166	45633	16	16	10	53	28	30	21	20	43	6	23	40	251	150	0.000506013	0.0200811	0.153,0.255,0.166	0.677,0.342,0.391	-0.279	69	27	44	43	40	83
45634	ENSG00000158483	FAM86C1	chr11	+	71793379	71793481	71791735	71791819	71796016	71796166	45634	26	26	18	46	40	49	17	22	48	16	18	22	251	150	0.000111318	0.0064133	0.252,0.28,0.18	0.388,0.422,0.566	-0.221	72	33	66	40	67	70
46038	ENSG00000185513	L3MBTL1	chr20	+	43540752	43540815	43538974	43540308	43548146	43550941	46038	10	17	23	2	5	5	9	22	24	0	0	0	212	150	2.84582e-07	4.95197e-05	0.78,0.706,0.765	1.0,1.0,1.0	-0.25	12	9	22	22	28	24
46574	ENSG00000226777	FAM30A	chr14	+	105922540	105922643	105922198	105922344	105924335	105932642	46574	57	33	60	146	123	170	52	150	239	43	111	198	252	150	0	0	0.189,0.138,0.174	0.419,0.446,0.418	-0.261	203	95	156	261	230	437
46577	ENSG00000226777	FAM30A	chr14	+	105923014	105923122	105922198	105922344	105924335	105932642	46577	223	163	192	146	123	170	122	332	654	43	111	198	257	150	2.13651e-12	1.23228e-09	0.471,0.436,0.397	0.623,0.636,0.658	-0.204	369	165	286	443	362	852
46825	ENSG00000166169	POLL	chr10	-	101584601	101584919	101583507	101583681	101587245	101587406	46825	77	54	120	9	7	17	36	83	84	0	0	0	300	150	1.55393e-11	7.35183e-09	0.811,0.794,0.779	1.0,1.0,1.0	-0.205	86	36	61	83	137	84
46829	ENSG00000166169	POLL	chr10	-	101584877	101584919	101583507	101583681	101587245	101587406	46829	19	7	12	9	7	17	4	3	14	0	0	0	191	150	6.12043e-10	2.13726e-07	0.624,0.44,0.357	1.0,1.0,1.0	-0.526	28	4	14	3	29	14
47042	ENSG00000148498	PARD3	chr10	-	34450316	34450448	34401825	34401917	34470084	34470263	47042	44	73	46	8	7	11	9	18	35	0	0	2	281	150	2.66427e-05	0.00215376	0.746,0.848,0.691	1.0,1.0,0.903	-0.206	52	9	80	18	57	37
47478	ENSG00000165219	GAPVD1	chr9	+	125263550	125263700	125261830	125261959	125287761	125287883	47478	35	34	47	6	11	15	13	28	62	0	3	5	299	150	0.00086576	0.0302016	0.745,0.608,0.611	1.0,0.824,0.862	-0.241	41	13	45	31	62	67
47638	ENSG00000116539	ASH1L	chr1	-	155562152	155562295	155521099	155521618	155562778	155562807	47638	16	10	19	0	5	5	22	15	22	0	0	0	292	150	2.94573e-06	0.000365245	1.0,0.507,0.661	1.0,1.0,1.0	-0.277	16	22	15	15	24	22
49484	ENSG00000075415	SLC25A3	chr12	+	98595432	98595557	98593685	98594135	98597855	98598034	49484	21	15	46	2	11	0	11	30	49	0	0	0	274	150	3.83849e-05	0.00286318	0.852,0.427,1.0	1.0,1.0,1.0	-0.24	23	11	26	30	46	49
49635	ENSG00000130164	LDLR	chr19	+	11120091	11120233	11116093	11116212	11123173	11123344	49635	12	9	21	2	1	8	10	15	38	0	0	0	291	150	8.35248e-08	1.72885e-05	0.756,0.823,0.575	1.0,1.0,1.0	-0.282	14	10	10	15	29	38
49866	ENSG00000172382	PRSS27	chr16	-	2715717	2715880	2714064	2714336	2716499	2716526	49866	7	2	13	3	2	3	10	3	7	0	0	1	300	150	1.49952e-05	0.00135827	0.538,0.333,0.684	1.0,1.0,0.778	-0.408	10	10	4	3	16	8
50032	ENSG00000171853	TRAPPC12	chr2	+	3466253	3466393	3465596	3465695	3478845	3478871	50032	0	0	1	2	3	2	2	3	7	0	2	8	289	150	4.0913e-05	0.00299169	0.0,0.0,0.206	1.0,0.438,0.312	-0.515	2	2	3	5	3	15
50244	ENSG00000138658	ZGRF1	chr4	-	112589723	112589874	112586444	112586583	112603523	112603697	50244	5	2	21	0	1	8	4	13	26	0	0	0	300	150	4.73181e-05	0.00333583	1.0,0.5,0.568	1.0,1.0,1.0	-0.311	5	4	3	13	29	26
50652	ENSG00000144468	RHBDD1	chr2	+	226837547	226837770	226836055	226836087	226839408	226839626	50652	9	15	18	4	2	6	3	3	12	0	0	0	300	150	5.99208e-08	1.29784e-05	0.529,0.789,0.6	1.0,1.0,1.0	-0.361	13	3	17	3	24	12
51322	ENSG00000169084	DHRSX	chrX	-	2392353	2392474	2266853	2266947	2408744	2408813	51322	71	68	74	13	5	19	22	31	61	0	0	0	270	150	6.61088e-10	2.29293e-07	0.752,0.883,0.684	1.0,1.0,1.0	-0.227	84	22	73	31	93	61
51675	ENSG00000188917	TRMT2B	chrX	-	101051250	101051366	101041316	101041371	101051783	101052116	51675	10	5	5	8	0	4	4	19	16	0	1	0	265	150	8.63751e-06	0.00087886	0.414,1.0,0.414	1.0,0.915,1.0	-0.362	18	4	5	20	9	16
52196	ENSG00000189164	ZNF527	chr19	+	37380047	37380372	37379119	37379246	37388305	37393066	52196	9	20	12	7	2	0	15	13	27	0	0	2	300	150	0.00168256	0.0494108	0.391,0.833,1.0	1.0,1.0,0.871	-0.216	16	15	22	13	12	29
52262	ENSG00000215580	BCORP1	chrY	-	19473904	19474144	19466455	19467374	19474639	19474903	52262	54	27	37	4	5	7	6	3	5	0	0	0	300	150	7.48033e-06	0.000781761	0.871,0.73,0.725	1.0,1.0,1.0	-0.225	58	6	32	3	44	5
53207	ENSG00000168385	45171	chr2	+	241324408	241324662	241317498	241317599	241325992	241326113	53207	7	6	17	1	2	7	2	3	29	0	0	0	300	150	4.63177e-08	1.05204e-05	0.778,0.6,0.548	1.0,1.0,1.0	-0.358	8	2	8	3	24	29
53612	ENSG00000088986	DYNLL1	chr12	+	120495283	120495437	120488116	120488177	120496415	120496547	53612	0	0	4	4	2	7	1	7	16	2	5	3	300	150	0.00118774	0.037999	0.0,0.0,0.222	0.2,0.412,0.727	-0.372	4	3	2	12	11	19
53669	ENSG00000230487	PSMG3-AS1	chr7	+	1579286	1579404	1575786	1575888	1584383	1584418	53669	17	14	15	5	7	8	5	18	20	0	0	1	267	150	2.08755e-08	5.1893e-06	0.656,0.529,0.513	1.0,1.0,0.918	-0.407	22	5	21	18	23	21
53670	ENSG00000230487	PSMG3-AS1	chr7	+	1583161	1583269	1575786	1575888	1584383	1584632	53670	51	15	55	5	7	8	6	22	36	0	0	1	257	150	2.70058e-06	0.000341046	0.856,0.556,0.801	1.0,1.0,0.955	-0.247	56	6	22	22	63	37
54904	ENSG00000229180	AC006001.3	chr7	-	66541241	66541468	66530523	66531871	66545600	66545686	54904	2	8	1	5	7	18	3	8	17	1	5	5	300	150	0.000224375	0.0108555	0.167,0.364,0.027	0.6,0.444,0.63	-0.372	7	4	15	13	19	22
54927	ENSG00000229180	AC006001.3	chr7	-	66588511	66588580	66584102	66584466	66592256	66592386	54927	7	11	8	25	40	50	16	17	47	12	34	65	218	150	9.04595e-05	0.00549203	0.162,0.159,0.099	0.478,0.256,0.332	-0.215	32	28	51	51	58	112
55033	ENSG00000099785	44987	chr19	+	8418741	8418807	8413294	8413420	8426608	8426673	55033	3	6	3	4	3	5	3	11	12	0	2	0	215	150	1.7078e-06	0.0002344	0.344,0.583,0.295	1.0,0.793,1.0	-0.524	7	3	9	13	8	12
55054	ENSG00000108433	GOSR2	chr17	+	46931101	46931207	46929519	46929584	46935028	46935169	55054	80	58	49	121	94	145	29	50	84	34	23	60	255	150	7.76172e-05	0.00487672	0.28,0.266,0.166	0.334,0.561,0.452	-0.212	201	63	152	73	194	144
55401	ENSG00000259024	TVP23C-CDRT4	chr17	-	15540432	15540561	15440207	15440285	15545784	15545916	55401	40	42	54	10	11	19	5	3	6	0	0	0	278	150	5.3227e-07	8.63278e-05	0.683,0.673,0.605	1.0,1.0,1.0	-0.346	50	5	53	3	73	6
56148	ENSG00000126461	SCAF1	chr19	+	49646107	49646202	49642124	49642242	49650867	49650998	56148	2	0	0	0	2	4	2	2	2	0	1	0	244	150	1.14333e-06	0.000167685	1.0,0.0,0.0	1.0,0.551,1.0	-0.517	2	2	2	3	4	2
56958	ENSG00000152784	PRDM8	chr4	+	80196962	80197216	80196351	80196601	80197624	80197763	56958	10	11	1	0	2	6	3	3	4	0	1	0	300	150	0.00104	0.0344646	1.0,0.733,0.077	1.0,0.6,1.0	-0.263	10	3	13	4	7	4
57086	ENSG00000115042	FAHD2A	chr2	+	95410526	95410586	95405552	95405803	95412433	95412542	57086	18	11	32	14	11	20	7	16	18	1	0	0	209	150	5.05355e-11	2.1984e-08	0.48,0.418,0.535	0.834,1.0,1.0	-0.467	32	8	22	16	52	18
57470	ENSG00000153898	MCOLN2	chr1	-	84971935	84972034	84965548	84965708	84997007	84997112	57470	267	229	293	163	133	194	47	113	155	20	18	38	248	150	2.08059e-05	0.00176971	0.498,0.51,0.477	0.587,0.792,0.712	-0.202	430	67	362	131	487	193
57526	ENSG00000162885	B3GALNT2	chr1	-	235470849	235470960	235455558	235455684	235494680	235494828	57526	4	3	1	0	2	3	3	5	2	0	0	0	260	150	0.000398869	0.0168518	1.0,0.464,0.161	1.0,1.0,1.0	-0.458	4	3	5	5	4	2
58052	ENSG00000205583	STAG3L1	chr7	+	75365563	75365643	75365254	75365353	75366323	75366438	58052	92	6	7	3	3	5	51	34	98	0	4	0	229	150	0.000406564	0.0170855	0.953,0.567,0.478	1.0,0.848,1.0	-0.283	95	51	9	38	12	98
58142	ENSG00000269713	NBPF9	chr1	-	149073767	149073870	149072717	149072932	149075654	149075864	58142	51	8	17	12	4	2	51	16	154	1	0	9	252	150	0.000456508	0.0186648	0.717,0.543,0.835	0.968,1.0,0.911	-0.261	63	52	12	16	19	163
58296	ENSG00000198431	TXNRD1	chr12	+	104289465	104289542	104288894	104289040	104290992	104291104	58296	4	3	2	20	18	24	6	5	2	3	8	3	226	150	0.00106676	0.0350798	0.117,0.1,0.052	0.57,0.293,0.307	-0.3	24	9	21	13	26	5
58914	ENSG00000010704	HFE	chr6	+	26090909	26091104	26087280	26087516	26091313	26091589	58914	13	18	18	4	1	2	9	27	49	0	0	0	300	150	0.000109874	0.00635149	0.619,0.9,0.818	1.0,1.0,1.0	-0.221	17	9	19	27	20	49
60421	ENSG00000004866	ST7	chr7	+	117190132	117190268	117189320	117189393	117209786	117209937	60421	19	8	15	2	2	3	4	5	22	0	0	0	285	150	7.59958e-05	0.00481018	0.833,0.678,0.725	1.0,1.0,1.0	-0.255	21	4	10	5	18	22
60424	ENSG00000004866	ST7	chr7	+	117191634	117191761	117190833	117190936	117198319	117198540	60424	0	0	2	2	2	1	1	2	5	2	0	1	276	150	0.000617262	0.0234188	0.0,0.0,0.521	0.214,1.0,0.731	-0.475	2	3	2	2	3	6
60773	ENSG00000111752	PHC1	chr12	+	8933306	8933350	8932562	8932813	8933864	8933980	60773	9	9	18	7	6	2	5	19	16	0	0	1	193	150	9.31552e-07	0.000140026	0.5,0.538,0.875	1.0,1.0,0.926	-0.338	16	5	15	19	20	17
61090	ENSG00000205085	FAM71F2	chr7	+	128680030	128680149	128677563	128677813	128682963	128683134	61090	16	15	26	5	1	3	7	24	25	0	0	0	268	150	6.02612e-06	0.000650549	0.642,0.894,0.829	1.0,1.0,1.0	-0.212	21	7	16	24	29	25
62023	ENSG00000266338	NBPF15	chr1	-	144442669	144442920	144440140	144440295	144448774	144448916	62023	23	20	17	15	32	35	12	21	35	3	9	6	300	150	2.30859e-05	0.00192068	0.434,0.238,0.195	0.667,0.538,0.745	-0.361	38	15	52	30	52	41
63279	ENSG00000102890	ELMO3	chr16	+	67200450	67200550	67200191	67200361	67200656	67200806	63279	7	5	16	2	4	0	8	6	13	0	1	0	249	150	0.00150057	0.0454321	0.678,0.43,1.0	1.0,0.783,1.0	-0.225	9	8	9	7	16	13
63594	ENSG00000134490	TMEM241	chr18	-	23421366	23421444	23384989	23385067	23437780	23437939	63594	4	8	7	3	3	2	7	8	23	0	1	0	227	150	8.83892e-06	0.000894037	0.468,0.638,0.698	1.0,0.841,1.0	-0.346	7	7	11	9	9	23
63834	ENSG00000187741	FANCA	chr16	-	89762637	89762793	89761948	89762022	89764806	89764947	63834	0	2	2	7	4	4	21	54	60	3	5	6	300	150	5.41955e-12	2.86803e-09	0.0,0.2,0.2	0.778,0.844,0.833	-0.685	7	24	6	59	6	66
64370	ENSG00000111371	SLC38A1	chr12	-	46254813	46254936	46239678	46239893	46268525	46268997	64370	7	29	30	3	10	6	4	19	50	0	0	0	272	150	9.55175e-10	3.24712e-07	0.563,0.615,0.734	1.0,1.0,1.0	-0.363	10	4	39	19	36	50
64479	ENSG00000196338	NLGN3	chrX	+	71167010	71167800	71164142	71164328	71169253	71170293	64479	12	13	26	6	1	0	3	12	12	0	0	0	300	150	0.000709237	0.0260701	0.5,0.867,1.0	1.0,1.0,1.0	-0.211	18	3	14	12	26	12
64852	ENSG00000196296	ATP2A1	chr16	+	28903699	28903741	28903322	28903440	28904179	28904464	64852	6	8	18	5	3	3	7	6	24	0	0	3	191	150	0.00138622	0.042789	0.485,0.677,0.825	1.0,1.0,0.863	-0.292	11	7	11	6	21	27
64911	ENSG00000197619	ZNF615	chr19	-	52003696	52003900	52002154	52002281	52007292	52007330	64911	51	29	23	4	3	10	8	65	84	0	0	1	300	150	1.18698e-07	2.33005e-05	0.864,0.829,0.535	1.0,1.0,0.977	-0.25	55	8	32	65	33	85
64912	ENSG00000197619	ZNF615	chr19	-	52003696	52003900	52002154	52002281	52008140	52008163	64912	50	32	27	45	12	20	21	50	106	6	7	18	300	150	2.12987e-05	0.00180118	0.357,0.571,0.403	0.636,0.781,0.746	-0.277	95	27	44	57	47	124
65234	ENSG00000235944	ZNF815P	chr7	+	5839948	5840075	5833526	5833568	5840689	5840856	65234	27	16	23	8	6	6	12	20	42	0	0	3	276	150	3.13453e-06	0.000384476	0.647,0.592,0.676	1.0,1.0,0.884	-0.323	35	12	22	20	29	45
65652	ENSG00000103852	TTC23	chr15	-	99241364	99241559	99228532	99228732	99249416	99249531	65652	30	38	50	11	12	17	8	16	20	0	0	1	300	150	1.55958e-08	3.97307e-06	0.577,0.613,0.595	1.0,1.0,0.909	-0.375	41	8	50	16	67	21
65812	ENSG00000225793	AL080250.1	chr6	+	75290253	75290338	75285032	75285309	75293492	75293594	65812	4	7	1	2	0	5	2	6	8	0	0	0	234	150	7.24072e-05	0.00463554	0.562,1.0,0.114	1.0,1.0,1.0	-0.441	6	2	7	6	6	8
65856	ENSG00000164081	TEX264	chr3	+	51672209	51672301	51671894	51672083	51684412	51684573	65856	0	4	6	3	0	7	3	5	7	0	0	1	241	150	3.94847e-05	0.00291843	0.0,1.0,0.348	1.0,1.0,0.813	-0.488	3	3	4	5	13	8
65928	ENSG00000087274	ADD1	chr4	+	2867971	2868129	2844149	2844834	2875895	2876110	65928	17	26	3	30	14	0	7	23	33	0	0	0	300	150	4.83848e-08	1.08459e-05	0.221,0.481,1.0	1.0,1.0,1.0	-0.433	47	7	40	23	3	33
66245	ENSG00000226824	AC006001.2	chr7	+	66667397	66667610	66654550	66654626	66668763	66668913	66245	2	0	5	23	19	18	4	10	4	1	7	21	300	150	0.00160335	0.0476573	0.042,0.0,0.122	0.667,0.417,0.087	-0.336	25	5	19	17	23	25
66772	ENSG00000110651	CD81	chr11	+	2386554	2386639	2385665	2385806	2390411	2390526	66772	11	22	16	4	0	13	19	25	64	3	0	0	234	150	0.000143078	0.00772703	0.638,1.0,0.441	0.802,1.0,1.0	-0.241	15	22	22	25	29	64
69373	ENSG00000283549	AC007161.3	chr7	+	7641503	7641705	7640751	7640821	7673308	7673453	69373	22	4	42	59	48	89	4	10	13	4	6	13	300	150	0.000651779	0.0245109	0.157,0.04,0.191	0.333,0.455,0.333	-0.244	81	8	52	16	131	26
69381	ENSG00000167182	SP2	chr17	+	47897814	47897927	47896181	47896293	47922961	47923274	69381	0	3	4	6	2	0	3	6	7	0	0	2	262	150	0.000570965	0.0220369	0.0,0.462,1.0	1.0,1.0,0.667	-0.402	6	3	5	6	4	9
70004	ENSG00000188002	AC026412.1	chr5	-	1632643	1632751	1626785	1626926	1632844	1632906	70004	9	5	5	4	1	7	2	10	8	0	0	1	257	150	3.78542e-06	0.000447216	0.568,0.745,0.294	1.0,1.0,0.824	-0.406	13	2	6	10	12	9
70006	ENSG00000188002	AC026412.1	chr5	-	1632643	1632751	1630408	1630566	1632844	1632906	70006	15	8	20	35	54	57	5	29	32	1	9	7	257	150	1.11022e-16	1.02686e-13	0.2,0.08,0.17	0.745,0.653,0.727	-0.558	50	6	62	38	77	39
70079	ENSG00000144395	CCDC150	chr2	+	196720173	196720234	196719496	196719584	196720574	196720668	70079	7	9	5	5	1	1	7	8	23	0	1	0	210	150	0.000157545	0.00834157	0.5,0.865,0.781	1.0,0.851,1.0	-0.235	12	7	10	9	6	23
70649	ENSG00000030582	GRN	chr17	+	44346088	44346228	44345609	44345741	44349157	44349275	70649	16	24	17	41	29	28	9	20	40	0	12	17	289	150	0.00139928	0.0431145	0.168,0.3,0.24	1.0,0.464,0.55	-0.435	57	9	53	32	45	57
71138	ENSG00000068976	PYGM	chr11	-	64753518	64753682	64753072	64753187	64753878	64754025	71138	10	4	10	2	0	4	2	10	10	0	0	0	300	150	0.000345768	0.0151443	0.714,1.0,0.556	1.0,1.0,1.0	-0.243	12	2	4	10	14	10
72101	ENSG00000116350	SRSF4	chr1	-	29166728	29166866	29159373	29160517	29168502	29173494	72101	12	4	16	2	3	2	11	13	19	0	0	0	287	150	2.08698e-05	0.00177367	0.758,0.411,0.807	1.0,1.0,1.0	-0.341	14	11	7	13	18	19
72473	ENSG00000214078	CPNE1	chr20	-	35658929	35658982	35632794	35632923	35664358	35664900	72473	35	37	49	18	13	26	6	25	41	0	2	0	202	150	3.30354e-11	1.4746e-08	0.591,0.679,0.583	1.0,0.903,1.0	-0.35	53	6	50	27	75	41
72479	ENSG00000214078	CPNE1	chr20	-	35658929	35659014	35632794	35632923	35664358	35664900	72479	55	54	69	18	13	26	8	34	56	0	2	0	234	150	4.52661e-11	1.97755e-08	0.662,0.727,0.63	1.0,0.916,1.0	-0.299	73	8	67	36	95	56
72577	ENSG00000107104	KANK1	chr9	+	471448	471586	470555	470682	473193	473273	72577	25	11	16	4	6	2	7	13	15	0	1	0	287	150	1.86044e-05	0.00161592	0.766,0.489,0.807	1.0,0.872,1.0	-0.27	29	7	17	14	18	15
72636	ENSG00000156958	GALK2	chr15	+	49318971	49319116	49318110	49318192	49319603	49319805	72636	32	23	31	13	10	8	9	17	33	1	0	3	294	150	5.57254e-05	0.00378877	0.557,0.54,0.664	0.821,1.0,0.849	-0.303	45	10	33	17	39	36
72694	ENSG00000284697	AC006511.5	chr12	+	8125560	8125677	8120907	8121106	8129263	8129362	72694	4	14	7	4	0	4	9	4	18	0	0	0	266	150	8.15803e-06	0.000840653	0.361,1.0,0.497	1.0,1.0,1.0	-0.381	8	9	14	4	11	18
73077	ENSG00000131759	RARA	chr17	+	40326474	40326551	40309191	40309286	40330856	40331396	73077	0	3	14	7	6	3	1	14	12	1	0	1	226	150	2.02353e-05	0.00173266	0.0,0.249,0.756	0.399,1.0,0.888	-0.427	7	2	9	14	17	13
73324	ENSG00000156500	FAM122C	chrX	+	134847382	134847475	134845346	134845401	134852799	134852896	73324	13	4	15	7	2	6	2	8	17	0	2	0	242	150	4.10002e-05	0.00299593	0.535,0.554,0.608	1.0,0.713,1.0	-0.339	20	2	6	10	21	17
73330	ENSG00000156500	FAM122C	chrX	+	134849166	134849228	134845346	134845401	134852799	134852896	73330	7	2	11	7	2	6	2	2	7	0	2	0	211	150	0.000891502	0.0308897	0.416,0.416,0.566	1.0,0.416,1.0	-0.339	14	2	4	4	17	7
73818	ENSG00000104529	EEF1D	chr8	-	143590644	143590738	143589643	143590081	143592714	143592942	73818	21	8	30	6	2	3	5	6	14	0	0	0	243	150	2.70296e-06	0.000341046	0.684,0.712,0.861	1.0,1.0,1.0	-0.248	27	5	10	6	33	14
73926	ENSG00000156265	MAP3K7CL	chr21	+	29133305	29133414	29092438	29092581	29149188	29149250	73926	65	46	96	14	10	31	16	54	75	0	4	0	258	150	1.53484e-09	4.84844e-07	0.73,0.728,0.643	1.0,0.887,1.0	-0.262	79	16	56	58	127	75
73967	ENSG00000169057	MECP2	chrX	-	154039791	154039903	154032434	154032557	154048516	154049479	73967	5	3	8	4	1	8	9	8	22	0	1	1	261	150	3.97912e-07	6.68603e-05	0.418,0.633,0.365	1.0,0.821,0.927	-0.444	9	9	4	9	16	23
73968	ENSG00000169057	MECP2	chrX	-	154039791	154039903	154032434	154032557	154056940	154057254	73968	5	3	8	21	17	32	5	9	27	1	17	17	261	150	0.000923328	0.0317353	0.12,0.092,0.126	0.742,0.233,0.477	-0.371	26	6	20	26	40	44
73971	ENSG00000169057	MECP2	chrX	-	154039791	154039903	154032434	154032557	154097603	154097764	73971	7	3	10	107	73	86	5	13	23	0	74	24	261	150	0.000931805	0.0318879	0.036,0.023,0.063	1.0,0.092,0.355	-0.442	114	5	76	87	96	47
74714	ENSG00000284671	AC009093.9	chr16	+	29087333	29087403	29086213	29086275	29090739	29090838	74714	6	11	1	12	9	9	2	16	43	0	4	7	219	150	7.65982e-06	0.000797561	0.255,0.456,0.071	1.0,0.733,0.808	-0.586	18	2	20	20	10	50
74782	ENSG00000242086	MUC20-OT1	chr3	+	195689338	195689438	195688366	195688797	195696360	195696425	74782	30	35	48	10	5	11	14	40	70	0	1	2	249	150	1.61767e-07	3.03616e-05	0.644,0.808,0.724	1.0,0.96,0.955	-0.246	40	14	40	41	59	72
75122	ENSG00000131781	FMO5	chr1	-	147208851	147209051	147201151	147201504	147212392	147212535	75122	8	7	5	2	4	0	5	15	18	0	0	2	300	150	0.000571509	0.0220391	0.667,0.467,1.0	1.0,1.0,0.818	-0.228	10	5	11	15	5	20
75716	ENSG00000164751	PEX2	chr8	-	76988306	76988338	76980257	76984195	76999989	77000132	75716	61	73	83	35	14	21	28	46	126	1	2	5	181	150	2.803e-09	8.38981e-07	0.591,0.812,0.766	0.959,0.95,0.954	-0.231	96	29	87	48	104	131
75826	ENSG00000104881	PPP1R13L	chr19	-	45401998	45402124	45398263	45398339	45404998	45405063	75826	0	0	0	18	14	21	1	4	2	8	3	8	275	150	0.00108415	0.0354454	0.0,0.0,0.0	0.064,0.421,0.12	-0.202	18	9	14	7	21	10
75979	ENSG00000179818	PCBP1-AS1	chr2	-	70053730	70053792	70051044	70051305	70083537	70083687	75979	3	4	9	19	8	14	10	4	12	2	3	8	211	150	0.00080599	0.0286106	0.101,0.262,0.314	0.78,0.487,0.516	-0.369	22	12	12	7	23	20
76998	ENSG00000136682	CBWD2	chr2	+	113471032	113471089	113462407	113462494	113482176	113482228	76998	39	21	52	10	11	8	26	26	187	1	2	5	206	150	1.98077e-07	3.61842e-05	0.74,0.582,0.826	0.95,0.904,0.965	-0.224	49	27	32	28	60	192
77208	ENSG00000023697	DERA	chr12	+	15916116	15916316	15911690	15911753	15956935	15957033	77208	1	1	1	12	13	14	6	7	2	6	1	11	300	150	0.000112126	0.00644175	0.04,0.037,0.034	0.333,0.778,0.083	-0.361	13	12	14	8	15	13
77407	ENSG00000204536	CCHCR1	chr6	-	31157384	31157500	31157022	31157089	31158166	31158189	77407	0	1	0	124	106	120	11	41	74	25	90	116	265	150	0	0	0.0,0.005,0.0	0.199,0.205,0.265	-0.221	124	36	107	131	120	190
77409	ENSG00000204536	CCHCR1	chr6	-	31157384	31157500	31157022	31157155	31158166	31158189	77409	0	1	0	2	2	2	2	2	21	2	1	5	265	150	9.27149e-07	0.000139833	0.0,0.221,0.0	0.361,0.531,0.704	-0.458	2	4	3	3	2	26
77666	ENSG00000133318	RTN3	chr11	+	63718701	63721032	63704850	63704907	63749990	63750198	77666	8	15	16	2	2	4	3	6	19	0	0	0	300	150	4.1778e-06	0.000481384	0.667,0.789,0.667	1.0,1.0,1.0	-0.292	10	3	17	6	20	19
78438	ENSG00000116473	RAP1A	chr1	+	111627469	111627563	111619776	111619934	111691333	111691417	78438	102	135	156	170	138	0	5	145	73	0	0	0	243	150	3.44371e-08	8.14627e-06	0.27,0.377,1.0	1.0,1.0,1.0	-0.451	272	5	273	145	156	73
78730	ENSG00000280828	AC090114.3	chr7	+	128577963	128578033	128574719	128574791	128578889	128578933	78730	41	34	39	41	35	50	22	35	44	0	5	0	219	150	0	0	0.407,0.4,0.348	1.0,0.827,1.0	-0.557	82	22	69	40	89	44
78858	ENSG00000283228	AC068547.1	chr2	-	151869176	151869735	151855223	151855375	151870530	151870611	78858	0	1	0	4	1	3	4	3	3	0	10	8	300	150	0.000873595	0.030382	0.0,0.333,0.0	1.0,0.13,0.158	-0.318	4	4	2	13	3	11
78967	ENSG00000170100	ZNF778	chr16	+	89223156	89223283	89222091	89222183	89224718	89224802	78967	22	20	55	13	18	25	26	57	53	3	10	16	276	150	0.000735989	0.026823	0.479,0.377,0.545	0.825,0.756,0.643	-0.274	35	29	38	67	80	69
79597	ENSG00000116977	LGALS8	chr1	+	236542914	236543040	236542760	236542787	236543559	236543648	79597	277	280	353	386	271	409	140	286	424	42	68	104	275	150	0	0	0.281,0.36,0.32	0.645,0.696,0.69	-0.357	663	182	551	354	762	528
79680	ENSG00000257815	LINC01481	chr12	-	70243065	70243204	70242796	70242893	70243311	70243349	79680	49	34	62	38	49	78	43	95	135	9	38	45	288	150	5.37453e-08	1.18976e-05	0.402,0.265,0.293	0.713,0.566,0.61	-0.31	87	52	83	133	140	180
79762	ENSG00000120948	TARDBP	chr1	+	11024301	11024335	11022817	11023329	11025109	11025207	79762	31	15	35	12	1	8	13	9	14	0	0	0	183	150	4.70964e-07	7.74864e-05	0.679,0.925,0.782	1.0,1.0,1.0	-0.205	43	13	16	9	43	14
80024	ENSG00000205559	CHKB-DT	chr22	+	50586529	50586639	50583155	50583323	50586842	50586952	80024	11	22	22	8	7	5	15	27	48	1	4	0	259	150	6.50609e-05	0.00425716	0.443,0.645,0.718	0.897,0.796,1.0	-0.296	19	16	29	31	27	48
80170	ENSG00000169814	BTD	chr3	+	15632590	15632866	15601751	15601770	15635423	15635429	80170	2	0	0	6	12	8	2	0	6	1	2	1	300	150	0.00128758	0.040462	0.143,0.0,0.0	0.5,0.0,0.75	-0.369	8	3	12	2	8	7
80179	ENSG00000214135	AC132008.2	chr3	-	197622186	197622330	197621703	197621868	197623219	197623382	80179	163	76	253	75	44	71	55	197	304	17	28	30	293	150	0.00012766	0.00710361	0.527,0.469,0.646	0.624,0.783,0.838	-0.201	238	72	120	225	324	334
80509	ENSG00000059378	PARP12	chr7	-	140041643	140041839	140034234	140034331	140054661	140054763	80509	21	18	28	1	3	8	4	5	22	0	0	0	300	150	1.18816e-06	0.000172535	0.913,0.75,0.636	1.0,1.0,1.0	-0.234	22	4	21	5	36	22
80619	ENSG00000170919	TPT1-AS1	chr13	+	45344304	45344446	45341418	45341630	45369958	45370330	80619	26	21	54	6	5	8	15	28	38	0	3	0	291	150	8.08545e-05	0.00502582	0.691,0.684,0.777	1.0,0.828,1.0	-0.225	32	15	26	31	62	38
80627	ENSG00000170919	TPT1-AS1	chr13	+	45344328	45344446	45341510	45341630	45369958	45370182	80627	23	21	45	6	5	8	15	19	39	0	3	0	267	150	0.000104715	0.00609789	0.683,0.702,0.76	1.0,0.781,1.0	-0.212	29	15	26	22	53	39
80629	ENSG00000170919	TPT1-AS1	chr13	+	45344378	45344446	45341512	45341614	45370079	45370182	80629	7	3	13	2	1	3	2	5	3	0	0	0	217	150	0.000198814	0.00986779	0.708,0.675,0.75	1.0,1.0,1.0	-0.289	9	2	4	5	16	3
80671	ENSG00000170919	TPT1-AS1	chr13	+	45379898	45380001	45379194	45379335	45383090	45383235	80671	12	22	11	1	0	10	3	18	17	0	0	0	252	150	0.000171417	0.00889265	0.877,1.0,0.396	1.0,1.0,1.0	-0.242	13	3	22	18	21	17
81156	ENSG00000123179	EBPL	chr13	-	49663056	49663195	49660722	49661208	49691253	49691438	81156	382	312	440	72	70	108	327	524	884	11	3	100	288	150	2.10942e-15	1.76068e-12	0.734,0.699,0.68	0.939,0.989,0.822	-0.212	454	338	382	527	548	984
81158	ENSG00000123179	EBPL	chr13	-	49669776	49669846	49660722	49661208	49691253	49691463	81158	143	146	131	72	70	108	68	230	360	11	3	100	219	150	7.15601e-09	1.98025e-06	0.576,0.588,0.454	0.809,0.981,0.711	-0.294	215	79	216	233	239	460
81162	ENSG00000123179	EBPL	chr13	-	49686474	49686595	49660722	49661208	49691253	49691463	81162	1	10	10	72	70	108	9	11	14	11	3	100	270	150	0.00024986	0.0117594	0.008,0.074,0.049	0.313,0.671,0.072	-0.308	73	20	80	14	118	114
81936	ENSG00000104714	ERICH1	chr8	-	640582	640834	614745	615284	668597	669277	81936	7	5	10	14	16	18	3	2	18	0	1	3	300	150	5.48959e-05	0.00373732	0.2,0.135,0.217	1.0,0.5,0.75	-0.566	21	3	21	3	28	21
82296	ENSG00000117054	ACADM	chr1	+	75728388	75728488	75724779	75724817	75732643	75732741	82296	1421	1126	1413	349	307	364	782	1481	2162	13	53	57	249	150	0	0	0.71,0.688,0.7	0.973,0.944,0.958	-0.259	1770	795	1433	1534	1777	2219
82594	ENSG00000181027	FKRP	chr19	+	46747233	46747305	46746056	46746090	46748026	46748088	82594	7	6	6	82	76	67	7	7	13	16	3	47	221	150	0.000208309	0.0102571	0.055,0.051,0.057	0.229,0.613,0.158	-0.279	89	23	82	10	73	60
82901	ENSG00000100401	RANGAP1	chr22	-	41284900	41285153	41280932	41281082	41285362	41285905	82901	31	42	55	6	16	8	41	69	116	2	4	9	300	150	0.000379149	0.0162054	0.721,0.568,0.775	0.911,0.896,0.866	-0.203	37	43	58	73	63	125
83179	ENSG00000042088	TDP1	chr14	+	89956577	89956800	89956036	89956278	89966146	89966190	83179	38	12	35	8	1	8	13	29	26	0	0	0	300	150	3.48195e-08	8.19896e-06	0.704,0.857,0.686	1.0,1.0,1.0	-0.251	46	13	13	29	43	26
83264	ENSG00000161217	PCYT1A	chr3	-	196283474	196283538	196270414	196270541	196287175	196287263	83264	17	14	18	4	3	6	7	19	26	0	0	0	213	150	1.08421e-07	2.1698e-05	0.75,0.767,0.679	1.0,1.0,1.0	-0.268	21	7	17	19	24	26
83391	ENSG00000103248	MTHFSD	chr16	-	86552178	86552292	86548463	86548577	86554644	86554748	83391	94	106	124	36	23	33	47	130	228	0	9	35	263	150	3.12729e-05	0.00242679	0.598,0.724,0.682	1.0,0.892,0.788	-0.225	130	47	129	139	157	263
83907	ENSG00000138640	FAM13A	chr4	-	88990972	88991150	88936282	88938241	89020459	89020669	83907	5	2	10	3	2	8	4	4	2	0	0	2	300	150	0.00134189	0.0417724	0.455,0.333,0.385	1.0,1.0,0.333	-0.387	8	4	4	4	18	4
85066	ENSG00000166295	ANAPC16	chr10	+	72220053	72220379	72216028	72216072	72230365	72230440	85066	233	182	275	113	89	171	60	169	278	0	41	93	300	150	0.000831074	0.02925	0.508,0.506,0.446	1.0,0.673,0.599	-0.271	346	60	271	210	446	371
85615	ENSG00000134779	TPGS2	chr18	-	36781798	36781922	36780023	36780188	36798448	36798609	85615	0	0	0	25	21	27	19	46	108	10	36	41	273	150	0	0	0.0,0.0,0.0	0.511,0.412,0.591	-0.505	25	29	21	82	27	149
87291	ENSG00000157191	NECAP2	chr1	+	16450124	16450241	16449092	16449201	16458841	16458956	87291	4	5	8	6	2	7	4	4	4	0	0	2	266	150	0.000244491	0.0115698	0.273,0.585,0.392	1.0,1.0,0.53	-0.427	10	4	7	4	15	6
87306	ENSG00000047365	ARAP2	chr4	-	36019143	36019286	36012562	36012831	36045978	36046076	87306	7	2	1	1	1	5	2	6	5	0	0	0	292	150	9.30838e-07	0.000140026	0.782,0.507,0.093	1.0,1.0,1.0	-0.539	8	2	3	6	6	5
87538	ENSG00000213753	CENPBD1P1	chr19	+	58586154	58586356	58575444	58575588	58591497	58591624	87538	27	24	43	10	21	17	17	36	67	0	0	0	300	150	0	0	0.574,0.364,0.558	1.0,1.0,1.0	-0.501	37	17	45	36	60	67
87872	ENSG00000140992	PDPK1	chr16	+	2565552	2565697	2561479	2561522	2566355	2566453	87872	11	25	10	17	12	10	2	5	55	0	1	5	294	150	9.53625e-06	0.000945697	0.248,0.515,0.338	1.0,0.718,0.849	-0.489	28	2	37	6	20	60
88009	ENSG00000235098	ANKRD65	chr1	-	1420051	1420592	1418421	1419549	1420815	1421005	88009	13	9	10	2	3	1	2	5	13	0	0	0	300	150	0.000310435	0.013881	0.765,0.6,0.833	1.0,1.0,1.0	-0.267	15	2	12	5	11	13
88249	ENSG00000163138	PACRGL	chr4	+	20701757	20701884	20700458	20700617	20702140	20702221	88249	7	6	0	0	3	3	4	4	11	0	0	0	276	150	7.64908e-05	0.00482743	1.0,0.521,0.0	1.0,1.0,1.0	-0.493	7	4	9	4	3	11
88577	ENSG00000115677	HDLBP	chr2	-	241268828	241268953	241268476	241268541	241271916	241271971	88577	84	98	145	37	37	43	15	63	84	1	10	13	274	150	0.000343308	0.0150623	0.554,0.592,0.649	0.891,0.775,0.78	-0.217	121	16	135	73	188	97
88884	ENSG00000162148	PPP1R32	chr11	+	61486523	61486610	61485798	61485911	61486947	61487061	88884	4	4	12	2	1	3	2	5	11	0	1	0	236	150	0.000454943	0.0186157	0.56,0.718,0.718	1.0,0.761,1.0	-0.255	6	2	5	6	15	11
89121	ENSG00000068745	IP6K2	chr3	-	48694701	48694824	48694174	48694240	48695089	48695418	89121	1	2	5	27	45	41	12	23	11	7	77	50	272	150	4.33738e-05	0.00312051	0.02,0.024,0.063	0.486,0.141,0.108	-0.209	28	19	47	100	46	61
89169	ENSG00000164830	OXR1	chr8	+	106737519	106737600	106726106	106726309	106739457	106739583	89169	66	76	97	47	46	65	28	55	78	0	7	9	230	150	5.65914e-12	2.96426e-09	0.478,0.519,0.493	1.0,0.837,0.85	-0.399	113	28	122	62	162	87
89826	ENSG00000105676	ARMC6	chr19	+	19037551	19037707	19034130	19034238	19042715	19042877	89826	1	0	6	6	28	10	4	1	41	0	10	3	300	150	0.00119838	0.0382919	0.077,0.0,0.231	1.0,0.048,0.872	-0.537	7	4	28	11	16	44
90313	ENSG00000111596	CNOT2	chr12	+	70297758	70297879	70294236	70294294	70301704	70301865	90313	3	13	7	2	4	2	2	7	14	0	0	1	270	150	2.26045e-05	0.00188521	0.455,0.644,0.66	1.0,1.0,0.886	-0.376	5	2	17	7	9	15
91125	ENSG00000268434	AC011530.1	chr19	-	45780213	45780381	45779777	45779869	45785593	45785713	91125	6	4	7	0	5	4	4	10	9	0	0	2	300	150	0.000935497	0.0319716	1.0,0.286,0.467	1.0,1.0,0.692	-0.313	6	4	9	10	11	11
91891	ENSG00000132199	ENOSF1	chr18	-	691067	691106	690548	690745	693881	693908	91891	4	2	5	0	7	2	3	5	18	0	0	0	188	150	4.17331e-05	0.00303506	1.0,0.186,0.666	1.0,1.0,1.0	-0.383	4	3	9	5	7	18
92610	ENSG00000143363	PRUNE1	chr1	+	151018556	151018669	151017811	151017904	151027232	151027327	92610	19	13	19	4	4	0	5	12	31	0	0	0	262	150	3.3897e-05	0.00259037	0.731,0.65,1.0	1.0,1.0,1.0	-0.206	23	5	17	12	19	31
92717	ENSG00000166669	ATF7IP2	chr16	+	10387377	10387494	10386054	10386122	10414573	10414612	92717	15	15	31	10	8	11	10	23	27	2	2	3	266	150	0.000407183	0.0171045	0.458,0.514,0.614	0.738,0.866,0.835	-0.284	25	12	23	25	42	30
92991	ENSG00000005801	ZNF195	chr11	-	3362545	3362602	3361742	3361889	3369356	3369502	92991	1	2	2	6	0	5	2	3	10	0	0	0	206	150	5.40452e-07	8.73787e-05	0.108,1.0,0.226	1.0,1.0,1.0	-0.555	7	2	2	3	7	10
93659	ENSG00000113597	TRAPPC13	chr5	+	65655635	65655653	65652500	65652545	65658367	65658501	93659	116	62	127	91	104	127	26	124	222	10	63	117	167	150	9.28429e-05	0.00559373	0.534,0.349,0.473	0.7,0.639,0.63	-0.204	207	36	166	187	254	339
94887	ENSG00000205643	CDPF1	chr22	-	46247105	46247221	46244050	46245238	46248171	46248285	94887	22	16	45	10	6	25	10	38	41	0	0	11	265	150	0.000155324	0.00824953	0.555,0.602,0.505	1.0,1.0,0.678	-0.339	32	10	22	38	70	52
94888	ENSG00000205643	CDPF1	chr22	-	46247109	46247221	46244012	46245238	46248171	46248284	94888	58	49	81	10	6	25	29	86	117	0	0	11	261	150	1.26497e-05	0.001193	0.769,0.824,0.651	1.0,1.0,0.859	-0.205	68	29	55	86	106	128
94890	ENSG00000205643	CDPF1	chr22	-	46247124	46247221	46244010	46245238	46248171	46248285	94890	16	18	37	10	6	25	8	35	39	0	0	11	246	150	0.000183133	0.00934927	0.494,0.647,0.474	1.0,1.0,0.684	-0.356	26	8	24	35	62	50
95323	ENSG00000266913	LINC01841	chr19	-	14347314	14347409	14325351	14325431	14369942	14370196	95323	5	2	14	3	1	2	5	5	12	0	0	2	244	150	0.000293194	0.0133071	0.506,0.551,0.811	1.0,1.0,0.787	-0.306	8	5	3	5	16	14
95375	ENSG00000285702	AC211476.5	chr7	+	73067814	73067927	73067561	73067648	73069347	73069506	95375	7	24	0	0	4	14	4	5	4	0	0	1	262	150	0.000172482	0.00892982	1.0,0.775,0.0	1.0,1.0,0.696	-0.307	7	4	28	5	14	5
95384	ENSG00000277125	AC211476.4	chr7	+	73067824	73067927	73067561	73067648	73069347	73069531	95384	7	19	0	0	4	14	4	6	4	0	0	1	252	150	0.00012379	0.00694095	1.0,0.739,0.0	1.0,1.0,0.704	-0.322	7	4	23	6	14	5
95723	ENSG00000105700	KXD1	chr19	+	18560099	18560550	18557897	18557914	18564868	18564990	95723	5	9	9	4	2	0	7	13	19	0	0	0	300	150	0.000329599	0.0146043	0.385,0.692,1.0	1.0,1.0,1.0	-0.308	9	7	11	13	9	19
95882	ENSG00000204514	ZNF814	chr19	-	57868457	57868579	57858814	57858983	57876915	57877042	95882	1	2	6	1	2	2	4	3	4	1	0	0	271	150	0.000182814	0.00933971	0.356,0.356,0.624	0.689,1.0,1.0	-0.451	2	5	4	3	8	4
96023	ENSG00000171033	PKIA	chr8	+	78572810	78572939	78516138	78516468	78598357	78598535	96023	58	36	79	22	24	22	28	102	166	1	8	38	278	150	0.000498837	0.0198886	0.587,0.447,0.66	0.938,0.873,0.702	-0.273	80	29	60	110	101	204
96347	ENSG00000276550	HERC2P2	chr15	+	22534067	22534243	22516875	22516990	22537437	22537608	96347	20	12	22	3	7	8	54	64	63	1	5	0	300	150	1.73984e-06	0.000237528	0.769,0.462,0.579	0.964,0.865,1.0	-0.34	23	55	19	69	30	63
96758	ENSG00000133466	C1QTNF6	chr22	-	37191671	37191737	37190864	37190928	37195380	37195458	96758	6	8	21	9	3	7	3	9	16	0	0	0	215	150	5.58853e-09	1.57191e-06	0.317,0.65,0.677	1.0,1.0,1.0	-0.452	15	3	11	9	28	16
96765	ENSG00000229018	PMS2P7	chr7	+	73011731	73011834	73011468	73011555	73013091	73013277	96765	3	8	4	4	3	4	2	22	26	0	0	1	252	150	3.61916e-09	1.04961e-06	0.309,0.613,0.373	1.0,1.0,0.939	-0.548	7	2	11	22	8	27
97060	ENSG00000182472	CAPN12	chr19	-	38733702	38733781	38731106	38731223	38735369	38735405	97060	30	17	41	4	6	4	5	42	44	0	0	0	228	150	3.5851e-07	6.06367e-05	0.831,0.651,0.871	1.0,1.0,1.0	-0.216	34	5	23	42	45	44
97062	ENSG00000182472	CAPN12	chr19	-	38733702	38733940	38731106	38731223	38734812	38734870	97062	32	17	41	6	2	6	3	37	46	0	0	0	300	150	1.16245e-07	2.30391e-05	0.727,0.81,0.774	1.0,1.0,1.0	-0.23	38	3	19	37	47	46
97063	ENSG00000182472	CAPN12	chr19	-	38733702	38733940	38731106	38731223	38735369	38735544	97063	32	21	41	4	6	4	3	36	46	0	0	0	300	150	1.89061e-07	3.48133e-05	0.8,0.636,0.837	1.0,1.0,1.0	-0.242	36	3	27	36	45	46
97082	ENSG00000196428	TSC22D2	chr3	+	150438197	150438354	150423048	150423120	150457075	150457127	97082	26	33	13	20	7	9	17	27	31	0	1	2	300	150	7.99048e-08	1.65726e-05	0.394,0.702,0.419	1.0,0.931,0.886	-0.434	46	17	40	28	22	33
97456	ENSG00000260565	ERVK13-1	chr16	-	2669410	2669561	2663081	2663407	2671344	2671405	97456	34	29	62	15	13	15	22	25	48	1	0	0	300	150	3.43758e-12	1.91804e-09	0.531,0.527,0.674	0.917,1.0,1.0	-0.395	49	23	42	25	77	48
97698	ENSG00000263753	LINC00667	chr18	+	5240647	5241255	5238779	5239049	5241698	5241889	97698	11	17	12	30	37	33	13	30	33	8	25	42	300	150	0.000468691	0.0190416	0.155,0.187,0.154	0.448,0.375,0.282	-0.203	41	21	54	55	45	75
97759	ENSG00000185518	SV2B	chr15	+	91128722	91128810	91100314	91100363	91225872	91226714	97759	1	12	8	9	0	11	2	3	4	0	0	0	237	150	8.72851e-07	0.000133549	0.066,1.0,0.315	1.0,1.0,1.0	-0.54	10	2	12	3	19	4
98213	ENSG00000147526	TACC1	chr8	+	38788703	38788819	38757280	38757409	38825307	38825368	98213	24	10	17	4	3	5	6	22	27	0	1	0	265	150	2.07678e-06	0.000275113	0.773,0.654,0.658	1.0,0.926,1.0	-0.28	28	6	13	23	22	27
99591	ENSG00000106266	SNX8	chr7	-	2264297	2264458	2257665	2257803	2314327	2314464	99591	7	12	18	4	0	2	5	11	23	0	0	0	300	150	0.001152	0.0370985	0.467,1.0,0.818	1.0,1.0,1.0	-0.238	11	5	12	11	20	23
99999	ENSG00000111266	DUSP16	chr12	-	12554535	12554659	12521080	12521463	12560765	12560886	99999	31	24	17	13	7	22	4	27	33	0	0	0	273	150	3.88212e-12	2.11999e-09	0.567,0.653,0.298	1.0,1.0,1.0	-0.494	44	4	31	27	39	33
100086	ENSG00000108854	SMURF2	chr17	-	64606601	64606640	64598381	64598490	64661828	64661928	100086	38	52	27	16	4	22	38	47	57	2	3	6	188	150	0.000676314	0.0252227	0.655,0.912,0.495	0.938,0.926,0.883	-0.228	54	40	56	50	49	63
100241	ENSG00000058673	ZC3H11A	chr1	+	203796450	203796601	203795653	203795775	203801574	203801628	100241	35	14	25	32	16	33	24	42	63	8	18	18	300	150	2.45634e-06	0.000318008	0.354,0.304,0.275	0.6,0.538,0.636	-0.28	67	32	30	60	58	81
101086	ENSG00000158636	EMSY	chr11	+	76537794	76537950	76528267	76528466	76542215	76542367	101086	33	18	44	0	10	9	17	24	58	0	2	0	300	150	4.75372e-05	0.00334503	1.0,0.474,0.71	1.0,0.857,1.0	-0.224	33	17	28	26	53	58
101662	ENSG00000089775	ZBTB25	chr14	-	64502900	64503127	64490360	64490540	64504486	64504584	101662	18	20	28	6	2	11	8	20	20	0	0	0	300	150	1.83317e-08	4.60152e-06	0.6,0.833,0.56	1.0,1.0,1.0	-0.336	24	8	22	20	39	20
101667	ENSG00000062485	CS	chr12	-	56275995	56276143	56273745	56273796	56282419	56282608	101667	24	23	26	6	0	6	13	29	23	0	0	0	297	150	1.73952e-06	0.000237528	0.669,1.0,0.686	1.0,1.0,1.0	-0.215	30	13	23	29	32	23
102785	ENSG00000198373	WWP2	chr16	+	69783031	69783152	69776188	69776241	69786995	69787080	102785	34	35	35	63	72	85	21	60	99	11	81	28	270	150	0.000172002	0.00891141	0.231,0.213,0.186	0.515,0.292,0.663	-0.28	97	32	107	141	120	127
103783	ENSG00000152601	MBNL1	chr3	+	152396166	152396224	152335110	152335230	152414940	152415111	103783	0	4	1	22	28	9	2	9	17	0	18	0	207	150	5.64885e-07	9.04742e-05	0.0,0.094,0.075	1.0,0.266,1.0	-0.699	22	2	32	27	10	17
103795	ENSG00000152601	MBNL1	chr3	+	152447619	152447773	152268039	152269092	152459270	152459302	103795	15	14	7	0	2	8	4	7	29	0	0	0	300	150	3.73568e-05	0.00279945	1.0,0.778,0.304	1.0,1.0,1.0	-0.306	15	4	16	7	15	29
103946	ENSG00000010270	STARD3NL	chr7	+	38179089	38179145	38178350	38178420	38202069	38202197	103946	41	48	70	23	12	12	14	28	36	1	0	5	205	150	0.000376967	0.016139	0.566,0.745,0.81	0.911,1.0,0.84	-0.21	64	15	60	28	82	41
103950	ENSG00000010270	STARD3NL	chr7	+	38198210	38198365	38178394	38178420	38202069	38202197	103950	16	9	9	23	12	12	4	13	15	1	0	5	300	150	6.42835e-05	0.00422243	0.258,0.273,0.273	0.667,1.0,0.6	-0.488	39	5	21	13	21	20
103955	ENSG00000010270	STARD3NL	chr7	+	38201713	38201966	38178389	38178420	38202069	38202197	103955	50	28	74	23	12	12	19	41	48	1	0	5	300	150	1.22927e-05	0.00116639	0.521,0.538,0.755	0.905,1.0,0.828	-0.306	73	20	40	41	86	53
104198	ENSG00000180385	EMC3-AS1	chr3	+	9987814	9987905	9987214	9987264	9988711	9988747	104198	34	27	28	9	6	9	12	27	53	0	1	5	240	150	0.000273918	0.0126277	0.702,0.738,0.66	1.0,0.944,0.869	-0.238	43	12	33	28	37	58
104199	ENSG00000180385	EMC3-AS1	chr3	+	9987905	9988007	9986892	9987264	9988711	9988747	104199	15	17	23	9	6	9	11	33	20	0	1	5	251	150	0.000567222	0.0219089	0.499,0.629,0.604	1.0,0.952,0.705	-0.308	24	11	23	34	32	25
104666	ENSG00000214176	PLEKHM1P1	chr17	-	64814862	64815245	64804829	64805100	64821766	64822052	104666	5	4	11	59	56	82	30	60	103	14	39	53	300	150	0	0	0.041,0.034,0.063	0.517,0.435,0.493	-0.436	64	44	60	99	93	156
105449	ENSG00000165948	IFI27L1	chr14	+	94094749	94094899	94081395	94081449	94096840	94096965	105449	3	0	4	7	2	8	2	5	7	0	0	4	299	150	0.000288383	0.0131353	0.177,0.0,0.201	1.0,1.0,0.467	-0.696	10	2	2	5	12	11
105457	ENSG00000165948	IFI27L1	chr14	+	94097494	94097678	94096855	94096965	94101813	94101975	105457	56	35	32	56	26	33	9	44	65	2	13	12	300	150	3.77483e-08	8.80779e-06	0.333,0.402,0.327	0.692,0.629,0.73	-0.33	112	11	61	57	65	77
106158	ENSG00000189223	PAX8-AS1	chr2	+	113250766	113250922	113235424	113235570	113255389	113255549	106158	4	7	2	5	3	4	3	2	2	0	0	0	300	150	1.59955e-11	7.53294e-09	0.286,0.538,0.2	1.0,1.0,1.0	-0.659	9	3	10	2	6	2
107509	ENSG00000118514	ALDH8A1	chr6	-	134929053	134929215	134917389	134918867	134932775	134933032	107509	0	0	1	5	3	3	4	3	10	0	1	0	300	150	2.45692e-13	1.61692e-10	0.0,0.0,0.143	1.0,0.6,1.0	-0.819	5	4	3	4	4	10
107749	ENSG00000026508	CD44	chr11	+	35208104	35208206	35189834	35189972	35211245	35211253	107749	1	19	2	2	0	6	3	2	10	0	0	2	251	150	0.00124254	0.0393842	0.23,1.0,0.166	1.0,1.0,0.749	-0.451	3	3	19	2	8	12
108458	ENSG00000108829	LRRC59	chr17	-	50375724	50375883	50375058	50375320	50385117	50385134	108458	12	11	12	1	0	7	6	11	7	0	0	0	300	150	0.000137047	0.00748001	0.857,1.0,0.462	1.0,1.0,1.0	-0.227	13	6	11	11	19	7
108476	ENSG00000136819	C9orf78	chr9	-	129834711	129834766	129833657	129833709	129835138	129835254	108476	433	362	400	124	108	151	309	608	865	5	14	26	204	150	0	0	0.72,0.711,0.661	0.978,0.97,0.961	-0.272	557	314	470	622	551	891
108701	ENSG00000165810	BTNL9	chr5	+	181054238	181054259	181053468	181053501	181055988	181056015	108701	0	1	0	2	1	3	4	16	23	0	2	6	170	150	1.15515e-07	2.29832e-05	0.0,0.469,0.0	1.0,0.876,0.772	-0.726	2	4	2	18	3	29
108702	ENSG00000165810	BTNL9	chr5	+	181055432	181055453	181053468	181053501	181055988	181056015	108702	0	1	0	2	1	3	6	20	11	0	2	6	170	150	2.21393e-07	3.98759e-05	0.0,0.469,0.0	1.0,0.898,0.618	-0.682	2	6	2	22	3	17
109264	ENSG00000204138	PHACTR4	chr1	+	28457831	28457859	28432930	28433046	28459084	28459239	109264	3	9	2	0	4	4	4	3	13	0	0	1	177	150	0.000107192	0.00622798	1.0,0.656,0.298	1.0,1.0,0.917	-0.321	3	4	13	3	6	14
109457	ENSG00000215126	CBWD6	chr9	-	41161600	41161723	41145280	41145332	41162332	41162377	109457	6	6	18	4	0	2	4	4	5	0	0	0	272	150	0.00110029	0.0358267	0.453,1.0,0.832	1.0,1.0,1.0	-0.238	10	4	6	4	20	5
109750	ENSG00000102606	ARHGEF7	chr13	+	111209871	111210002	111153713	111153991	111233204	111233293	109750	9	3	13	0	4	4	13	18	22	0	0	2	280	150	0.000581452	0.0223075	1.0,0.287,0.635	1.0,1.0,0.855	-0.311	9	13	7	18	17	24
110234	ENSG00000172456	FGGY	chr1	+	59321535	59321750	59296980	59297150	59346246	59346398	110234	51	35	54	6	17	21	22	16	25	0	0	0	300	150	5.20379e-10	1.86149e-07	0.81,0.507,0.563	1.0,1.0,1.0	-0.373	57	22	52	16	75	25
110242	ENSG00000172456	FGGY	chr1	+	59339957	59340069	59296980	59297150	59346246	59346369	110242	71	82	110	6	17	21	11	40	69	0	0	0	261	150	1.93398e-10	7.46436e-08	0.872,0.735,0.751	1.0,1.0,1.0	-0.214	77	11	99	40	131	69
110528	ENSG00000068650	ATP11A	chr13	+	112878216	112878303	112875775	112875941	112881815	112887168	110528	51	44	57	46	39	45	50	117	188	23	21	98	236	150	0.000618554	0.0234418	0.413,0.418,0.446	0.58,0.78,0.549	-0.211	97	73	83	138	102	286
111962	ENSG00000147789	ZNF7	chr8	+	144829042	144829090	144827463	144827609	144837390	144837507	111962	4	2	6	12	9	27	7	2	10	0	17	0	197	150	0.00117333	0.0376438	0.202,0.145,0.145	1.0,0.082,1.0	-0.53	16	7	11	19	33	10
112539	ENSG00000173915	ATP5MD	chr10	-	103395745	103396032	103394198	103394394	103396408	103396441	112539	348	257	353	196	146	193	140	293	381	5	14	20	300	150	0	0	0.47,0.468,0.478	0.933,0.913,0.905	-0.445	544	145	403	307	546	401
113174	ENSG00000269834	ZNF528-AS1	chr19	-	52395597	52395750	52389018	52389303	52397461	52397757	113174	7	7	9	3	6	3	3	3	7	0	0	0	300	150	9.3519e-10	3.20038e-07	0.538,0.368,0.6	1.0,1.0,1.0	-0.498	10	3	13	3	12	7
113660	ENSG00000206149	HERC2P9	chr15	+	28612058	28612173	28590188	28590260	28632636	28632807	113660	18	5	2	3	6	0	3	2	46	0	0	1	264	150	4.92439e-05	0.00342522	0.773,0.321,1.0	1.0,1.0,0.963	-0.29	21	3	11	2	2	47
113668	ENSG00000206149	HERC2P9	chr15	+	28629265	28629441	28590188	28590260	28632636	28632807	113668	3	6	3	3	6	0	4	6	7	0	0	1	300	150	3.20023e-05	0.00247031	0.333,0.333,1.0	1.0,1.0,0.778	-0.371	6	4	12	6	3	8
113905	ENSG00000265148	TSPOAP1-AS1	chr17	+	58346279	58346343	58337307	58337679	58351743	58351914	113905	2	10	27	84	104	101	2	9	15	0	0	2	213	150	0	0	0.016,0.063,0.158	1.0,1.0,0.841	-0.868	86	2	114	9	128	17
113907	ENSG00000265148	TSPOAP1-AS1	chr17	+	58346279	58346343	58339242	58339447	58351743	58351914	113907	12	10	26	47	49	47	4	11	7	0	0	0	213	150	0	0	0.152,0.126,0.28	1.0,1.0,1.0	-0.814	59	4	59	11	73	7
114252	ENSG00000072786	STK10	chr5	-	172093411	172093960	172082960	172083084	172105655	172105737	114252	3	7	10	4	2	3	7	12	33	0	0	0	300	150	1.04954e-08	2.78696e-06	0.273,0.636,0.625	1.0,1.0,1.0	-0.489	7	7	9	12	13	33
114580	ENSG00000132950	ZMYM5	chr13	-	19838699	19838985	19835476	19835689	19851688	19852150	114580	26	13	19	6	0	5	3	11	9	0	0	0	300	150	3.06667e-06	0.000377054	0.684,1.0,0.655	1.0,1.0,1.0	-0.22	32	3	13	11	24	9
115092	ENSG00000122085	MTERF4	chr2	-	241094276	241094429	241089979	241090044	241097242	241097427	115092	177	185	190	67	84	80	95	363	500	2	3	7	300	150	0	0	0.569,0.524,0.543	0.96,0.984,0.973	-0.427	244	97	269	366	270	507
115097	ENSG00000122085	MTERF4	chr2	-	241094276	241094432	241089979	241090044	241097242	241097427	115097	219	236	256	67	84	80	129	451	637	2	3	7	300	150	0	0	0.62,0.584,0.615	0.97,0.987,0.978	-0.372	286	131	320	454	336	644
115102	ENSG00000122085	MTERF4	chr2	-	241096392	241096438	241090005	241090044	241097242	241097427	115102	193	173	181	67	84	80	73	139	227	2	3	7	195	150	0	0	0.689,0.613,0.635	0.966,0.973,0.961	-0.321	260	75	257	142	261	234
115330	ENSG00000224699	LAMTOR5-AS1	chr1	+	110414151	110414231	110412172	110412293	110416008	110416089	115330	7	9	2	36	18	33	4	13	8	1	10	13	229	150	0.0012484	0.0395454	0.113,0.247,0.038	0.724,0.46,0.287	-0.358	43	5	27	23	35	21
115358	ENSG00000177853	ZNF518A	chr10	+	96151415	96151566	96135169	96135289	96155325	96155398	115358	22	5	41	3	4	7	3	23	35	0	0	0	300	150	1.24266e-07	2.40713e-05	0.786,0.385,0.745	1.0,1.0,1.0	-0.361	25	3	9	23	48	35
115738	ENSG00000109684	CLNK	chr4	-	10532255	10532283	10520790	10520831	10540493	10540604	115738	9	14	24	10	8	0	5	2	3	0	0	1	177	150	0.000213608	0.0104578	0.433,0.597,1.0	1.0,1.0,0.718	-0.229	19	5	22	2	24	4
115883	ENSG00000173295	FAM86B3P	chr8	+	8241540	8241680	8237125	8237275	8244098	8244296	115883	5	7	22	3	0	7	5	10	19	0	2	0	289	150	0.00109984	0.0358232	0.464,1.0,0.62	1.0,0.722,1.0	-0.213	8	5	7	12	29	19
115991	ENSG00000114867	EIF4G1	chr3	+	184316131	184316218	184315165	184315545	184317716	184317816	115991	19	20	20	17	33	24	8	30	38	2	19	10	236	150	0.000720456	0.026388	0.415,0.278,0.346	0.718,0.501,0.707	-0.296	36	10	53	49	44	48
116559	ENSG00000079150	FKBP7	chr2	-	178473028	178473142	178469651	178469782	178477061	178477213	116559	3	8	11	25	17	33	3	13	18	7	11	11	263	150	0.0016643	0.0490187	0.064,0.212,0.16	0.196,0.403,0.483	-0.215	28	10	25	24	44	29
117716	ENSG00000144218	AFF3	chr2	-	100112385	100112524	100104401	100104518	100142483	100142595	117716	1	5	3	2	4	11	7	16	16	0	0	2	288	150	2.31402e-10	8.73415e-08	0.207,0.394,0.124	1.0,1.0,0.806	-0.694	3	7	9	16	14	18
119084	ENSG00000065665	SEC61A2	chr10	+	12167752	12167893	12162212	12162289	12169257	12169961	119084	6	3	12	10	2	15	3	17	21	0	0	4	290	150	4.43747e-07	7.37173e-05	0.237,0.437,0.293	1.0,1.0,0.731	-0.588	16	3	5	17	27	25
119608	ENSG00000205726	ITSN1	chr21	+	33826817	33826863	33819240	33819323	33829623	33829686	119608	6	3	4	15	14	11	10	22	20	6	12	23	195	150	0.000198257	0.00985192	0.235,0.142,0.219	0.562,0.585,0.401	-0.317	21	16	17	34	15	43
120639	ENSG00000198231	DDX42	chr17	+	63775107	63775178	63773862	63774376	63792411	63792562	120639	48	34	34	32	12	22	12	30	77	0	6	14	220	150	0.000339181	0.0149131	0.506,0.659,0.513	1.0,0.773,0.789	-0.295	80	12	46	36	56	91
121171	ENSG00000100413	POLR3H	chr22	-	41533521	41533687	41532118	41532157	41540698	41540795	121171	10	17	17	4	2	4	4	19	22	0	0	2	300	150	0.000189813	0.00956659	0.556,0.81,0.68	1.0,1.0,0.846	-0.267	14	4	19	19	21	24
122585	ENSG00000140525	FANCI	chr15	+	89245194	89245311	89244016	89244067	89247628	89247731	122585	43	37	46	200	141	200	21	65	65	0	10	300	266	150	0.000376115	0.0161116	0.108,0.129,0.115	1.0,0.786,0.109	-0.514	243	21	178	75	246	365
122590	ENSG00000140525	FANCI	chr15	+	89245755	89245839	89244016	89244067	89247628	89247731	122590	29	45	41	200	141	200	15	58	100	0	10	300	233	150	9.21453e-05	0.00556804	0.085,0.17,0.117	1.0,0.789,0.177	-0.531	229	15	186	68	241	400
122672	ENSG00000023191	RNH1	chr11	-	504823	504888	502061	502249	506608	506759	122672	231	197	255	133	117	136	118	300	512	21	76	101	214	150	6.06182e-14	4.17676e-11	0.549,0.541,0.568	0.798,0.735,0.78	-0.218	364	139	314	376	391	613
122683	ENSG00000243753	HLA-L	chr6	+	30262294	30262342	30261586	30261703	30292402	30293014	122683	11	5	10	11	0	7	3	9	10	0	0	0	197	150	2.89616e-07	5.03104e-05	0.432,1.0,0.521	1.0,1.0,1.0	-0.349	22	3	5	9	17	10

## Sheet: T21vsD21 CA
ID...1	GeneID	geneSymbol	chr	strand	exonStart_0base	exonEnd	upstreamES	upstreamEE	downstreamES	downstreamEE	ID...12	IJC_S1R1	IJC_S1R2	IJC_S1R3	SJC_S1R1	SJC_S1R2	SJC_S1R3	IJC_S2R1	IJC_S2R2	IJC_S2R3	SJC_S2R1	SJC_S2R2	SJC_S2R3	IncFormLen	SkipFormLen	PValue	FDR	IncLevel1	IncLevel2	IncLevelDifference	S1R1counts	S2R1counts	S1R2counts	S2R2counts	S1R3counts	S2R3counts
538	ENSG00000229117	RPL41	chr12	+	56116774	56116829	56116631	56116659	56117481	56117710	538	20	12	9	0	0	1	7	14	14	162	46	232	204	150	0	0	1.0,1.0,0.869	0.031,0.183,0.042	0.871	20	169	12	60	10	246
699	ENSG00000167775	CD320	chr19	-	8305030	8305805	8303854	8303973	8308148	8308300	699	8	11	10	0	0	0	12	14	18	8	7	8	300	150	5.54188e-10	1.84572e-07	1.0,1.0,1.0	0.429,0.5,0.529	0.514	8	20	11	21	10	26
1129	ENSG00000146828	SLC12A9	chr7	+	100854155	100854378	100852736	100852839	100858834	100858942	1129	15	37	37	0	0	0	15	18	11	7	0	2	300	150	9.42931e-06	0.000912422	1.0,1.0,1.0	0.517,1.0,0.733	0.25	15	22	37	18	37	13
1525	ENSG00000136122	BORA	chr13	+	72731280	72731387	72727922	72728007	72737961	72738043	1525	17	20	14	2	0	0	2	8	10	6	5	0	256	150	0.000152435	0.00827356	0.833,1.0,1.0	0.163,0.484,1.0	0.395	19	8	20	13	14	10
2503	ENSG00000148516	ZEB1	chr10	+	31318912	31319133	31318494	31318580	31373017	31373173	2503	14	6	4	0	0	0	2	0	7	0	5	2	300	150	3.49523e-05	0.00263155	1.0,1.0,1.0	1.0,0.0,0.636	0.455	14	2	6	5	4	9
2801	ENSG00000237491	AL669831.5	chr1	+	804775	804966	803918	804222	807216	807314	2801	18	10	12	0	1	0	7	2	7	0	4	2	300	150	0.000464489	0.0191828	1.0,0.833,1.0	1.0,0.2,0.636	0.332	18	7	11	6	12	9
2922	ENSG00000211897	IGHG3	chr14	-	105770104	105770149	105769656	105769986	105770292	105770337	2922	246	140	258	224	325	255	723	328	544	7647	5965	6678	194	150	0	0	0.459,0.25,0.439	0.068,0.041,0.059	0.327	470	8370	465	6293	513	7222
2927	ENSG00000211897	IGHG3	chr14	-	105770292	105770337	105770104	105770149	105770480	105770525	2927	266	124	280	17	36	29	299	372	347	876	617	783	194	150	0	0	0.924,0.727,0.882	0.209,0.318,0.255	0.584	283	1175	160	989	309	1130
2928	ENSG00000211897	IGHG3	chr14	-	105770292	105770337	105770104	105770149	105770668	105770719	2928	69	66	68	1	8	6	715	381	530	618	158	592	194	150	5.32907e-15	3.89948e-12	0.982,0.864,0.898	0.472,0.651,0.409	0.404	70	1333	74	539	74	1122
2930	ENSG00000211897	IGHG3	chr14	-	105770480	105770525	105770104	105770149	105770668	105770719	2930	148	69	88	1	8	6	1373	1121	1239	618	158	592	194	150	4.17219e-10	1.41302e-07	0.991,0.87,0.919	0.632,0.846,0.618	0.228	149	1991	77	1279	94	1831
3024	ENSG00000233024	NPIPA9	chr16	-	18361169	18361277	18360092	18360153	18364226	18364371	3024	19	26	24	0	0	0	12	19	11	2	2	3	257	150	9.94124e-05	0.00594269	1.0,1.0,1.0	0.778,0.847,0.682	0.231	19	14	26	21	24	14
3201	ENSG00000171469	ZNF561	chr19	-	9617620	9617758	9614020	9614103	9618090	9618179	3201	40	65	45	13	12	14	7	5	9	4	11	19	287	150	1.16991e-05	0.00108795	0.617,0.739,0.627	0.478,0.192,0.198	0.372	53	11	77	16	59	28
3202	ENSG00000171469	ZNF561	chr19	-	9617620	9617758	9617044	9617171	9618090	9618179	3202	70	139	112	120	110	107	14	18	28	96	75	120	287	150	1.65312e-13	9.46984e-11	0.234,0.398,0.354	0.071,0.111,0.109	0.232	190	110	249	93	219	148
3204	ENSG00000171469	ZNF561	chr19	-	9617620	9617768	9617201	9617226	9618090	9618179	3204	22	37	41	7	11	10	13	6	9	6	10	13	297	150	0.000940181	0.0325791	0.613,0.629,0.674	0.523,0.233,0.259	0.3	29	19	48	16	51	22
3288	ENSG00000154102	C16orf74	chr16	-	85710409	85710473	85710163	85710285	85735189	85735235	3288	5	5	4	1	10	9	4	3	2	39	28	25	213	150	0.000940917	0.0325933	0.779,0.26,0.238	0.067,0.07,0.053	0.362	6	43	15	31	13	27
3699	ENSG00000224078	SNHG14	chr15	+	25055073	25055230	25053827	25053967	25056482	25056565	3699	16	15	16	16	24	14	4	0	5	10	9	16	300	150	0.000841238	0.0299051	0.333,0.238,0.364	0.167,0.0,0.135	0.211	32	14	39	9	30	21
4820	ENSG00000147677	EIF3H	chr8	-	116737236	116737287	116658812	116658980	116755665	116755829	4820	3	4	7	30	0	22	0	0	2	24	16	16	200	150	0.000297623	0.013813	0.07,1.0,0.193	0.0,0.0,0.086	0.392	33	24	4	16	29	18
5884	ENSG00000221923	ZNF880	chr19	+	52379420	52379540	52374298	52374427	52383848	52383969	5884	72	95	86	28	47	21	9	4	12	69	45	88	269	150	0	0	0.589,0.53,0.695	0.068,0.047,0.071	0.543	100	78	142	49	107	100
5886	ENSG00000136147	PHF11	chr13	+	49497055	49497217	49495983	49496095	49513058	49513166	5886	23	63	52	0	5	34	10	44	34	11	32	26	300	150	0.00106081	0.0354361	1.0,0.863,0.433	0.313,0.407,0.395	0.394	23	21	68	76	86	60
6119	ENSG00000089159	PXN	chr12	-	120224642	120224727	120224150	120224377	120226352	120226795	6119	9	3	12	2	0	0	46	23	42	2	15	15	234	150	0.000602884	0.0232007	0.743,1.0,1.0	0.936,0.496,0.642	0.223	11	48	3	38	12	57
6271	ENSG00000101104	PABPC1L	chr20	+	44932341	44932432	44930459	44930726	44933056	44933185	6271	5	3	3	0	2	0	1	3	1	1	7	7	240	150	3.30064e-06	0.000389274	1.0,0.484,1.0	0.385,0.211,0.082	0.602	5	2	5	10	3	8
6472	ENSG00000106603	COA1	chr7	-	43650611	43650712	43647227	43648652	43656032	43656153	6472	258	270	251	40	32	46	189	213	263	92	78	129	250	150	3.45279e-14	2.16335e-11	0.795,0.835,0.766	0.552,0.621,0.55	0.224	298	281	302	291	297	392
6494	ENSG00000106603	COA1	chr7	-	43665657	43665722	43656032	43656153	43729428	43729505	6494	36	44	33	43	67	39	10	7	33	75	69	74	214	150	2.14091e-07	3.8394e-05	0.37,0.315,0.372	0.085,0.066,0.238	0.223	79	85	111	76	72	107
6730	ENSG00000141380	SS18	chr18	-	26082362	26082528	26078075	26078160	26084051	26084175	6730	26	31	48	0	5	8	5	4	6	17	6	3	300	150	4.74417e-07	7.53715e-05	1.0,0.756,0.75	0.128,0.25,0.5	0.543	26	22	36	10	56	9
6732	ENSG00000141380	SS18	chr18	-	26082362	26082528	26078075	26078160	26091095	26091192	6732	26	29	39	1	2	0	3	2	7	0	3	3	300	150	0.00167915	0.0497433	0.929,0.879,1.0	1.0,0.25,0.538	0.34	27	3	31	5	39	10
6735	ENSG00000141380	SS18	chr18	-	26082362	26082528	26080304	26080423	26087500	26087577	6735	11	17	7	0	0	0	5	1	3	0	4	5	300	150	7.97546e-07	0.000116719	1.0,1.0,1.0	1.0,0.111,0.231	0.553	11	5	17	5	7	8
6769	ENSG00000116251	RPL22	chr1	-	6200488	6200727	6197651	6197756	6208680	6208739	6769	2	11	12	0	0	0	16	6	17	5	0	4	300	150	4.07704e-06	0.000462348	1.0,1.0,1.0	0.615,1.0,0.68	0.235	2	21	11	6	12	21
6770	ENSG00000116251	RPL22	chr1	-	6200488	6200750	6197651	6197756	6208680	6208739	6770	2	11	13	0	0	0	16	9	17	5	0	4	300	150	5.34452e-06	0.000571801	1.0,1.0,1.0	0.615,1.0,0.68	0.235	2	21	11	9	13	21
6822	ENSG00000177628	GBA	chr1	-	155239885	155240077	155238516	155238650	155244094	155244230	6822	9	3	4	0	1	0	2	2	11	2	2	5	300	150	8.70951e-06	0.000856002	1.0,0.6,1.0	0.333,0.333,0.524	0.47	9	4	4	4	4	16
6976	ENSG00000149743	TRPT1	chr11	-	64224794	64224970	64224542	64224717	64225785	64225869	6976	4	12	19	0	2	1	11	12	16	6	4	4	300	150	0.0010269	0.0347873	1.0,0.75,0.905	0.478,0.6,0.667	0.303	4	17	14	16	20	20
7088	ENSG00000065357	DGKA	chr12	+	55932560	55932909	55932107	55932123	55935304	55935402	7088	2	2	8	2	2	2	1	2	0	4	2	6	300	150	0.000754256	0.0274965	0.333,0.333,0.667	0.111,0.333,0.0	0.296	4	5	4	4	10	6
7893	ENSG00000122545	45176	chr7	+	35831352	35831496	35801217	35801270	35832797	35832900	7893	111	108	126	64	67	89	34	11	47	93	99	107	293	150	0	0	0.47,0.452,0.42	0.158,0.054,0.184	0.315	175	127	175	110	215	154
7894	ENSG00000122545	45176	chr7	+	35831424	35831496	35801218	35801270	35832797	35832900	7894	99	102	124	64	67	89	32	11	43	93	99	107	221	150	0	0	0.512,0.508,0.486	0.189,0.07,0.214	0.344	163	125	169	110	213	150
7895	ENSG00000122545	45176	chr7	+	35831491	35831496	35800931	35801270	35832797	35832900	7895	67	70	76	64	67	89	5	0	15	93	99	107	154	150	0	0	0.505,0.504,0.454	0.05,0.0,0.12	0.431	131	98	137	99	165	122
8628	ENSG00000182903	ZNF721	chr4	-	435769	435879	425814	427119	472574	472701	8628	6	10	2	0	0	2	0	2	7	2	4	4	259	150	8.60775e-05	0.00537973	1.0,1.0,0.367	0.0,0.225,0.503	0.546	6	2	10	6	4	11
8664	ENSG00000183648	NDUFB1	chr14	-	92118848	92118966	92116121	92116229	92121641	92121724	8664	5	17	12	0	0	6	3	0	13	4	6	4	267	150	0.00116478	0.0378697	1.0,1.0,0.529	0.296,0.0,0.646	0.529	5	7	17	6	18	17
9347	ENSG00000247877	AC021086.1	chr5	-	100534079	100534152	100457056	100457124	100535160	100535186	9347	4	7	5	1	8	0	0	1	2	4	4	2	222	150	0.000411104	0.0175223	0.73,0.372,1.0	0.0,0.145,0.403	0.518	5	4	15	5	5	4
9710	ENSG00000007129	CEACAM21	chr19	+	41586153	41586195	41585839	41585871	41586463	41586844	9710	18	33	37	0	0	0	78	47	70	67	59	57	191	150	0	0	1.0,1.0,1.0	0.478,0.385,0.491	0.549	18	145	33	106	37	127
9889	ENSG00000154258	ABCA9	chr17	-	68984884	68984979	68984055	68984175	68985052	68985128	9889	8	8	13	13	7	14	0	0	3	6	4	7	244	150	0.000127838	0.00720457	0.274,0.413,0.363	0.0,0.0,0.209	0.28	21	6	15	4	27	10
10021	ENSG00000186063	AIDA	chr1	-	222711378	222711545	222703147	222703217	222712207	222712263	10021	19	19	14	0	0	0	7	5	13	478	160	0	300	150	2.74512e-11	1.10077e-08	1.0,1.0,1.0	0.007,0.015,1.0	0.659	19	485	19	165	14	13
10133	ENSG00000079263	SP140	chr2	+	230253315	230253417	230250980	230251061	230255451	230255532	10133	726	805	855	8	25	13	238	237	271	47	39	54	251	150	0	0	0.982,0.951,0.975	0.752,0.784,0.75	0.207	734	285	830	276	868	325
10324	ENSG00000244479	OR2A1-AS1	chr7	-	144349103	144349443	144343241	144343298	144350717	144350824	10324	2	3	3	0	1	2	0	0	0	2	6	6	300	150	1.97008e-07	3.60396e-05	1.0,0.6,0.429	0.0,0.0,0.0	0.676	2	2	4	6	5	6
10514	ENSG00000095951	HIVEP1	chr6	+	12130766	12130942	12125745	12125870	12161438	12161929	10514	3	12	14	0	0	0	17	20	18	3	0	8	300	150	6.40128e-06	0.000662929	1.0,1.0,1.0	0.739,1.0,0.529	0.244	3	20	12	20	14	26
10742	ENSG00000121281	ADCY7	chr16	+	50287911	50288350	50266515	50266587	50292675	50292825	10742	31	41	23	1	0	0	35	0	32	0	10	2	300	150	0.000723036	0.0267169	0.939,1.0,1.0	1.0,0.0,0.889	0.35	32	35	41	10	23	34
11502	ENSG00000238005	AL391832.2	chr1	-	234961416	234961566	234959662	234959916	234968387	234968490	11502	17	17	21	0	2	0	19	9	21	10	10	8	299	150	1.14153e-08	2.91185e-06	1.0,0.81,1.0	0.488,0.311,0.568	0.481	17	29	19	19	21	29
11690	ENSG00000104490	NCALD	chr8	-	101721212	101721351	101719396	101719648	101887140	101887227	11690	2	7	1	0	0	2	8	20	7	160	114	165	288	150	4.81091e-06	0.000527086	1.0,1.0,0.207	0.025,0.084,0.022	0.692	2	168	7	134	3	172
11692	ENSG00000104490	NCALD	chr8	-	101745830	101745993	101719620	101719648	101750042	101750162	11692	7	6	13	0	0	0	10	13	16	3	2	9	300	150	1.5568e-08	3.89192e-06	1.0,1.0,1.0	0.625,0.765,0.471	0.38	7	13	6	15	13	25
11708	ENSG00000104490	NCALD	chr8	-	101779923	101779979	101719385	101719648	101887140	101887227	11708	19	13	16	0	0	2	43	28	44	160	114	165	205	150	0	0	1.0,1.0,0.854	0.164,0.152,0.163	0.792	19	203	13	142	18	209
11996	ENSG00000174851	YIF1A	chr11	-	66286940	66287014	66284915	66284966	66287597	66287676	11996	7	7	2	8	5	4	0	3	0	5	7	11	223	150	8.10088e-05	0.00513031	0.371,0.485,0.252	0.0,0.224,0.0	0.295	15	5	12	10	6	11
12082	ENSG00000129317	PUS7L	chr12	-	43758285	43758607	43754866	43755261	43758692	43758759	12082	15	4	6	3	0	0	4	4	4	4	2	4	300	150	0.000184109	0.00958282	0.714,1.0,1.0	0.333,0.5,0.333	0.516	18	8	4	6	6	8
12710	ENSG00000181555	SETD2	chr3	-	47103345	47103423	47097954	47098081	47113875	47114004	12710	2	6	4	0	6	1	1	0	2	8	5	1	227	150	0.000798742	0.0286689	1.0,0.398,0.726	0.076,0.0,0.569	0.493	2	9	12	5	5	3
13286	ENSG00000135912	TTLL4	chr2	+	218736311	218736376	218728024	218728067	218737578	218737978	13286	5	4	2	1	0	0	2	4	3	2	0	5	214	150	0.000106369	0.00625413	0.778,1.0,1.0	0.412,1.0,0.296	0.357	6	4	4	4	2	8
14038	ENSG00000183077	AFMID	chr17	+	78205092	78205190	78204827	78204900	78205439	78205518	14038	26	40	42	2	2	3	38	29	33	17	5	12	247	150	2.37641e-05	0.00191683	0.888,0.924,0.895	0.576,0.779,0.625	0.242	28	55	42	34	45	45
14042	ENSG00000183077	AFMID	chr17	+	78205439	78205518	78204827	78204900	78205945	78206050	14042	10	12	11	10	16	11	16	7	14	42	51	41	228	150	0.000329046	0.0149181	0.397,0.33,0.397	0.2,0.083,0.183	0.219	20	58	28	58	22	55
14920	ENSG00000145113	MUC4	chr3	-	195761483	195761585	195760883	195761117	195762854	195762945	14920	3	2	3	3	5	6	0	0	0	8	2	8	251	150	1.95995e-05	0.00163598	0.374,0.193,0.23	0.0,0.0,0.0	0.266	6	8	7	2	9	8
15385	ENSG00000100600	LGMN	chr14	-	92733681	92733810	92732648	92732815	92741061	92741179	15385	3	8	16	0	2	0	14	4	1	15	30	26	278	150	1.49128e-11	6.28144e-09	1.0,0.683,1.0	0.335,0.067,0.02	0.754	3	29	10	34	16	27
15571	ENSG00000205560	CPT1B	chr22	-	50573807	50573921	50573519	50573715	50574334	50574419	15571	318	320	436	78	98	130	124	109	135	134	113	150	263	150	0	0	0.699,0.651,0.657	0.345,0.355,0.339	0.323	396	258	418	222	566	285
15643	ENSG00000196295	GARS-DT	chr7	-	30579005	30579128	30568832	30568989	30585329	30585479	15643	2	3	2	4	3	12	0	0	1	15	4	20	272	150	0.00102989	0.0348211	0.216,0.355,0.084	0.0,0.0,0.027	0.209	6	15	6	4	14	21
15750	ENSG00000139187	KLRG1	chr12	+	8992205	8992310	8950043	8950236	9008974	9009075	15750	8	11	6	0	1	0	4	3	9	1	5	5	254	150	9.54354e-07	0.00013687	1.0,0.867,1.0	0.703,0.262,0.515	0.462	8	5	12	8	6	14
17101	ENSG00000169031	COL4A3	chr2	+	227308898	227309076	227307709	227307919	227309203	227309318	17101	7	2	9	0	0	0	57	42	69	22	6	9	300	150	1.31772e-06	0.000179727	1.0,1.0,1.0	0.564,0.778,0.793	0.288	7	79	2	48	9	78
17227	ENSG00000213185	FAM24B	chr10	-	122850423	122850520	122849095	122849439	122855644	122855786	17227	35	36	55	0	2	4	49	40	58	32	26	33	246	150	4.77396e-15	3.51897e-12	1.0,0.916,0.893	0.483,0.484,0.517	0.442	35	81	38	66	59	91
17228	ENSG00000213185	FAM24B	chr10	-	122850423	122850550	122849077	122849439	122855644	122855786	17228	62	67	93	0	2	4	76	62	73	32	26	33	276	150	0	0	1.0,0.948,0.927	0.563,0.564,0.546	0.401	62	108	69	88	97	106
17293	ENSG00000171492	LRRC8D	chr1	+	89929807	89929878	89846579	89846658	89933066	89933160	17293	2	7	2	0	0	1	3	4	1	7	3	5	220	150	4.64006e-07	7.41016e-05	1.0,1.0,0.577	0.226,0.476,0.12	0.585	2	10	7	7	3	6
17311	ENSG00000074582	BCS1L	chr2	+	218660036	218660166	218659713	218659743	218660938	218661307	17311	133	154	150	2	8	56	190	118	164	73	55	75	279	150	1.33893e-05	0.00120706	0.973,0.912,0.59	0.583,0.536,0.54	0.272	135	263	162	173	206	239
17315	ENSG00000074582	BCS1L	chr2	+	218660036	218660218	218659708	218659743	218660938	218661307	17315	115	126	104	2	8	56	142	89	169	73	55	75	300	150	0.000295545	0.0137548	0.966,0.887,0.481	0.493,0.447,0.53	0.288	117	215	134	144	160	244
17316	ENSG00000074582	BCS1L	chr2	+	218660036	218660245	218659734	218659743	218660938	218661307	17316	115	131	108	2	8	56	142	93	169	73	55	75	300	150	0.000217459	0.0109124	0.966,0.891,0.491	0.493,0.458,0.53	0.289	117	215	139	148	164	244
17319	ENSG00000074582	BCS1L	chr2	+	218660306	218660421	218659759	218659800	218660938	218661217	17319	11	24	8	0	0	0	25	27	29	12	4	10	264	150	8.15673e-09	2.13498e-06	1.0,1.0,1.0	0.542,0.793,0.622	0.348	11	37	24	31	8	39
17320	ENSG00000074582	BCS1L	chr2	+	218660306	218660482	218659716	218659743	218660938	218661307	17320	5	4	6	2	8	56	7	4	0	73	55	75	300	150	0.00137958	0.0430039	0.556,0.2,0.051	0.046,0.035,0.0	0.242	7	80	12	59	62	75
17900	ENSG00000186827	TNFRSF4	chr1	-	1212637	1212704	1211339	1211832	1212991	1213093	17900	14	29	28	0	0	0	14	12	8	4	1	2	216	150	9.75908e-05	0.00586116	1.0,1.0,1.0	0.709,0.893,0.735	0.221	14	18	29	13	28	10
18057	ENSG00000168404	MLKL	chr16	-	74675612	74675764	74671860	74672538	74682650	74682786	18057	13	6	7	0	0	0	3	5	5	1	2	2	300	150	6.05728e-05	0.0040709	1.0,1.0,1.0	0.6,0.556,0.556	0.429	13	4	6	7	7	7
18459	ENSG00000176681	LRRC37A	chr17	+	46332551	46332656	46330449	46331981	46335544	46335594	18459	3	3	2	2	0	0	1	2	1	8	0	2	254	150	0.000618816	0.0236594	0.47,1.0,1.0	0.069,1.0,0.228	0.391	5	9	3	2	2	3
18666	ENSG00000163900	TMEM41A	chr3	-	185481217	185481311	185477042	185477147	185488944	185489016	18666	4	1	8	1	2	0	2	0	0	6	2	6	243	150	1.75508e-06	0.000228498	0.712,0.236,1.0	0.171,0.0,0.0	0.592	5	8	3	2	8	6
19815	ENSG00000140400	MAN2C1	chr15	-	75365600	75365698	75364487	75364665	75365961	75366009	19815	2	4	1	0	0	2	0	6	0	3	2	4	247	150	0.000278149	0.013159	1.0,1.0,0.233	0.0,0.646,0.0	0.529	2	3	4	8	3	4
19964	ENSG00000161955	TNFSF13	chr17	+	7559067	7559297	7558292	7558375	7559845	7559893	19964	37	47	22	4	0	0	18	4	11	10	8	4	300	150	2.3373e-08	5.50023e-06	0.822,1.0,1.0	0.474,0.2,0.579	0.523	41	28	47	12	22	15
20809	ENSG00000255104	AC005324.4	chr17	+	15700047	15700168	15699740	15699777	15701151	15701240	20809	15	13	24	2	0	2	10	4	11	4	2	5	270	150	0.000608474	0.023371	0.806,1.0,0.87	0.581,0.526,0.55	0.34	17	14	13	6	26	16
21149	ENSG00000270231	NBPF8	chr1	+	120440741	120440814	120439475	120439690	120441277	120441489	21149	165	84	115	0	0	0	29	93	110	14	13	3	222	150	2.44535e-10	8.57139e-08	1.0,1.0,1.0	0.583,0.829,0.961	0.209	165	43	84	106	115	113
22776	ENSG00000025293	PHF20	chr20	+	35800093	35800173	35782327	35782609	35801490	35801605	22776	3	6	3	0	0	0	11	9	3	3	4	0	229	150	4.89137e-05	0.00344106	1.0,1.0,1.0	0.706,0.596,1.0	0.233	3	14	6	13	3	3
22934	ENSG00000138942	RNF185	chr22	+	31182968	31183066	31160242	31160303	31192683	31192702	22934	13	4	10	7	25	2	2	0	0	21	11	19	247	150	2.89218e-07	4.9225e-05	0.53,0.089,0.752	0.055,0.0,0.0	0.439	20	23	29	11	12	19
23242	ENSG00000153113	CAST	chr5	+	96740744	96740783	96740037	96740118	96741265	96741317	23242	963	863	989	0	0	0	469	384	520	339	293	398	188	150	0	0	1.0,1.0,1.0	0.525,0.511,0.51	0.485	963	808	863	677	989	918
23547	ENSG00000185485	SDHAP1	chr3	-	195986518	195986604	195985445	195985789	195990189	195990258	23547	191	187	193	0	0	0	131	134	108	24	27	44	235	150	0	0	1.0,1.0,1.0	0.777,0.76,0.61	0.284	191	155	187	161	193	152
23869	ENSG00000196118	CCDC189	chr16	-	30759653	30759724	30759341	30759458	30760283	30760453	23869	13	12	19	2	0	2	33	10	29	10	4	12	220	150	0.000611395	0.0234648	0.816,1.0,0.866	0.692,0.63,0.622	0.246	15	43	12	14	21	41
24285	ENSG00000214922	HLA-F-AS1	chr6	-	29747147	29747425	29726600	29727139	29748899	29749049	24285	14	11	20	0	0	0	9	2	19	0	8	3	300	150	2.68061e-05	0.00211096	1.0,1.0,1.0	1.0,0.111,0.76	0.376	14	9	11	10	20	22
24424	ENSG00000165480	SKA3	chr13	-	21172338	21172504	21159901	21159987	21176374	21176548	24424	18	34	48	0	0	6	20	39	24	8	5	6	300	150	0.00152186	0.0462733	1.0,1.0,0.8	0.556,0.796,0.667	0.26	18	28	34	44	54	30
24872	ENSG00000109685	NSD2	chr4	+	1893729	1893909	1892165	1892263	1900625	1900766	24872	75	87	44	18	0	2	97	115	124	33	26	36	300	150	0.00019992	0.0102357	0.676,1.0,0.917	0.595,0.689,0.633	0.225	93	130	87	141	46	160
24876	ENSG00000109685	NSD2	chr4	+	1899220	1899395	1892165	1892263	1900625	1901251	24876	17	7	3	18	0	2	5	4	2	33	26	36	300	150	2.67024e-05	0.00210776	0.321,1.0,0.429	0.07,0.071,0.027	0.527	35	38	7	30	5	38
25108	ENSG00000100418	DESI1	chr22	-	41607261	41607331	41603258	41603381	41620751	41621096	25108	11	22	18	0	3	5	0	10	0	3	4	4	219	150	9.82138e-05	0.00587805	1.0,0.834,0.711	0.0,0.631,0.0	0.638	11	3	25	14	23	4
26934	ENSG00000136104	RNASEH2B	chr13	+	50912994	50913131	50909779	50910140	50921177	50921331	26934	6	5	2	0	0	0	11	11	0	2	2	2	286	150	9.1994e-05	0.00561303	1.0,1.0,1.0	0.743,0.743,0.0	0.505	6	13	5	13	2	2
27218	ENSG00000137434	C6orf52	chr6	-	10684848	10684923	10683186	10683232	10686965	10687164	27218	19	22	20	31	29	15	4	8	7	46	29	29	224	150	1.9363e-06	0.000248222	0.291,0.337,0.472	0.055,0.156,0.139	0.25	50	50	51	37	35	36
29058	ENSG00000107099	DOCK8	chr9	+	280790	280905	271626	271729	286460	286636	29058	55	62	78	42	42	55	46	47	38	112	119	107	264	150	2.4758e-14	1.61165e-11	0.427,0.456,0.446	0.189,0.183,0.168	0.263	97	158	104	166	133	145
29204	ENSG00000196591	HDAC2	chr6	-	113962366	113962394	113959905	113960018	113968329	113968530	29204	4	15	8	0	0	2	1	6	5	4	1	2	177	150	0.000355155	0.0158438	1.0,1.0,0.772	0.175,0.836,0.679	0.361	4	5	15	7	10	7
29214	ENSG00000070831	CDC42	chr1	+	22074093	22074219	22052626	22052868	22078428	22078583	29214	391	382	344	0	0	0	309	269	338	92	77	95	275	150	0	0	1.0,1.0,1.0	0.647,0.656,0.66	0.346	391	401	382	346	344	433
29531	ENSG00000091073	DTX2	chr7	+	76463544	76463709	76461700	76461836	76476942	76477178	29531	12	19	9	0	0	10	9	4	12	14	6	13	300	150	0.00038828	0.0168208	1.0,1.0,0.31	0.243,0.25,0.316	0.5	12	23	19	10	19	25
29777	ENSG00000196152	ZNF79	chr9	+	127428551	127428660	127424373	127424910	127428831	127428920	29777	118	116	99	25	29	14	40	34	42	21	10	39	258	150	0.000775356	0.0280606	0.733,0.699,0.804	0.525,0.664,0.385	0.221	143	61	145	44	113	81
29854	ENSG00000196873	CBWD3	chr9	+	68256920	68256980	68248805	68248897	68258531	68258569	29854	139	105	236	2	3	3	54	72	209	4	77	2	209	150	0.000568321	0.0221083	0.98,0.962,0.983	0.906,0.402,0.987	0.21	141	58	108	149	239	211
30426	ENSG00000175354	PTPN2	chr18	-	12862639	12862744	12859163	12859254	12863196	12864194	30426	7	3	12	0	0	0	5	5	5	0	2	4	254	150	0.000206512	0.0104963	1.0,1.0,1.0	1.0,0.596,0.425	0.326	7	5	3	7	12	9
30581	ENSG00000187824	TMEM220	chr17	-	10723269	10723329	10713294	10715588	10725010	10725134	30581	15	30	21	0	0	1	24	3	14	6	6	2	209	150	1.13814e-06	0.000159131	1.0,1.0,0.938	0.742,0.264,0.834	0.366	15	30	30	9	22	16
30767	ENSG00000166839	ANKDD1A	chr15	+	64944651	64944747	64943483	64943582	64947403	64947593	30767	19	12	13	2	0	2	23	32	43	11	14	8	245	150	0.00112671	0.0369666	0.853,1.0,0.799	0.561,0.583,0.767	0.247	21	34	12	46	15	51
31031	ENSG00000108219	TSPAN14	chr10	+	80507227	80507374	80489211	80489314	80512143	80512269	31031	3	8	5	0	2	0	4	9	0	4	0	3	296	150	0.000966286	0.0332424	1.0,0.67,1.0	0.336,1.0,0.0	0.445	3	8	10	9	5	3
31232	ENSG00000214783	POLR2J4	chr7	-	43986600	43986677	43973209	43973323	44013592	44013679	31232	16	21	18	0	0	0	13	10	13	4	0	4	226	150	1.69711e-05	0.00146036	1.0,1.0,1.0	0.683,1.0,0.683	0.211	16	17	21	10	18	17
31259	ENSG00000156171	DRAM2	chr1	-	111139500	111139666	111137522	111137586	111140037	111140090	31259	548	607	655	2	0	0	297	237	310	142	129	166	300	150	0	0	0.993,1.0,1.0	0.511,0.479,0.483	0.507	550	439	607	366	655	476
31261	ENSG00000156171	DRAM2	chr1	-	111139587	111139711	111137522	111137586	111140037	111140062	31261	124	114	125	2	0	0	117	83	118	142	129	166	273	150	0	0	0.971,1.0,1.0	0.312,0.261,0.281	0.706	126	259	114	212	125	284
32259	ENSG00000196793	ZNF239	chr10	-	43567898	43568021	43556343	43558171	43574539	43574618	32259	3	7	3	0	1	0	7	6	12	8	3	0	272	150	0.000125059	0.00708474	1.0,0.794,1.0	0.325,0.524,1.0	0.315	3	15	8	9	3	12
33588	ENSG00000067057	PFKP	chr10	+	3125096	3125249	3118781	3118869	3129818	3129941	33588	2	10	12	0	0	0	4	7	2	0	2	3	300	150	0.00108588	0.0360098	1.0,1.0,1.0	1.0,0.636,0.25	0.371	2	4	10	9	12	5
33889	ENSG00000205268	PDE7A	chr8	-	65788881	65788981	65782782	65782843	65838473	65838748	33889	53	40	32	5	2	3	44	39	41	12	13	15	249	150	1.93093e-05	0.00162132	0.865,0.923,0.865	0.688,0.644,0.622	0.233	58	56	42	52	35	56
34087	ENSG00000023318	ERP44	chr9	-	100052416	100052532	100020615	100020731	100098783	100099040	34087	10	4	4	0	0	0	3	0	5	1	2	2	265	150	8.77426e-05	0.00546676	1.0,1.0,1.0	0.629,0.0,0.586	0.595	10	4	4	2	4	7
34346	ENSG00000064489	BORCS8-MEF2B	chr19	-	19157215	19157283	19150685	19150764	19180685	19180761	34346	12	16	11	46	2	28	5	1	1	29	28	8	217	150	0.00114528	0.0374162	0.153,0.847,0.214	0.106,0.024,0.08	0.335	58	34	18	29	39	9
34778	ENSG00000213096	ZNF254	chr19	+	24091900	24092015	24087175	24087337	24126253	24126320	34778	2	5	11	0	0	0	6	10	16	6	0	1	264	150	0.00146136	0.0448877	1.0,1.0,1.0	0.362,1.0,0.901	0.246	2	12	5	10	11	17
36773	ENSG00000146215	CRIP3	chr6	-	43307611	43307743	43306445	43306517	43308314	43308409	36773	7	7	18	0	0	0	9	4	6	4	3	0	281	150	2.04357e-05	0.00169303	1.0,1.0,1.0	0.546,0.416,1.0	0.346	7	13	7	7	18	6
36961	ENSG00000137959	IFI44L	chr1	+	78627905	78628393	78620402	78620571	78628950	78628999	36961	3160	3189	3440	23	6	11	171	131	114	276	226	259	300	150	0	0	0.986,0.996,0.994	0.237,0.225,0.18	0.778	3183	447	3195	357	3451	373
36962	ENSG00000137959	IFI44L	chr1	+	78627905	78628393	78620877	78620971	78628950	78628999	36962	1971	2106	2296	0	0	0	100	69	74	20	18	4	300	150	0	0	1.0,1.0,1.0	0.714,0.657,0.902	0.242	1971	120	2106	87	2296	78
37293	ENSG00000159214	CCDC24	chr1	+	43992152	43992387	43991846	43992004	43992522	43992639	37293	24	23	28	0	0	2	11	7	9	6	1	0	300	150	0.00107313	0.0357286	1.0,1.0,0.875	0.478,0.778,1.0	0.206	24	17	23	8	30	9
37502	ENSG00000102575	ACP5	chr19	-	11578023	11578194	11577592	11577679	11578479	11578657	37502	42	52	56	6	5	11	0	0	4	7	5	0	300	150	0.000511276	0.0205235	0.778,0.839,0.718	0.0,0.0,1.0	0.445	48	7	57	5	67	4
37950	ENSG00000078967	UBE2D4	chr7	+	43948631	43948737	43938430	43938494	43952649	43952957	37950	9	10	6	0	0	0	6	8	8	2	1	3	255	150	0.00014818	0.00809084	1.0,1.0,1.0	0.638,0.825,0.611	0.309	9	8	10	9	6	11
38640	ENSG00000110075	PPP6R3	chr11	+	68522493	68522689	68519500	68519651	68544837	68545024	38640	28	33	26	29	16	17	9	11	17	23	19	25	300	150	0.0010815	0.0359001	0.326,0.508,0.433	0.164,0.224,0.254	0.208	57	32	49	30	43	42
38830	ENSG00000111817	DSE	chr6	+	116369824	116369927	116258445	116258967	116399197	116399937	38830	41	57	79	7	12	12	6	8	6	14	12	6	252	150	3.46954e-10	1.18708e-07	0.777,0.739,0.797	0.203,0.284,0.373	0.484	48	20	69	20	91	12
39144	ENSG00000221978	CCNL2	chr1	-	1388625	1388743	1387953	1388065	1388949	1389047	39144	20	28	31	0	1	1	8	9	15	3	3	2	267	150	4.93325e-05	0.00345838	1.0,0.94,0.946	0.6,0.628,0.808	0.283	20	11	29	12	32	17
39295	ENSG00000123411	IKZF4	chr12	+	56019320	56019415	56018125	56018177	56021430	56021523	39295	6	13	14	0	0	2	16	10	15	6	2	2	244	150	0.000470894	0.0193786	1.0,1.0,0.811	0.621,0.755,0.822	0.204	6	22	13	12	16	17
39329	ENSG00000120942	UBIAD1	chr1	+	11293466	11293626	11273888	11274060	11294872	11295183	39329	6	10	2	0	0	1	5	8	10	0	4	9	300	150	0.000109287	0.00639195	1.0,1.0,0.5	1.0,0.5,0.357	0.214	6	5	10	12	3	19
39341	ENSG00000134291	TMEM106C	chr12	+	47966682	47966732	47964208	47964423	47968132	47968171	39341	12	4	11	27	4	17	4	4	4	42	27	27	199	150	8.98817e-05	0.00554629	0.251,0.43,0.328	0.067,0.1,0.1	0.247	39	46	8	31	28	31
39667	ENSG00000025423	HSD17B6	chr12	+	56781973	56782232	56752448	56752581	56784852	56785016	39667	8	16	7	0	0	1	6	6	8	0	5	3	300	150	5.00309e-05	0.00350244	1.0,1.0,0.778	1.0,0.375,0.571	0.277	8	6	16	11	8	11
39910	ENSG00000234062	AL390879.1	chrX	+	136921243	136922776	136909394	136909780	136925246	136925379	39910	7	11	16	2	0	6	0	8	0	2	2	6	300	150	0.000881992	0.0310238	0.636,1.0,0.571	0.0,0.667,0.0	0.513	9	2	11	10	22	6
39989	ENSG00000111364	DDX55	chr12	+	123605864	123605981	123602127	123602256	123607431	123607523	39989	9	23	11	1	0	0	9	23	8	1	2	4	266	150	0.000432422	0.0181683	0.835,1.0,1.0	0.835,0.866,0.53	0.201	10	10	23	25	11	12
40350	ENSG00000160055	TMEM234	chr1	-	32216383	32216517	32215846	32216281	32216888	32216947	40350	33	28	32	2	0	0	24	11	28	8	4	0	283	150	8.88612e-05	0.00551589	0.897,1.0,1.0	0.614,0.593,1.0	0.23	35	32	28	15	32	28
40423	ENSG00000230795	HLA-K	chr6	+	29928063	29928328	29927177	29927452	29928456	29928573	40423	43	43	49	0	0	0	3	8	9	3	1	2	300	150	6.21581e-05	0.00415969	1.0,1.0,1.0	0.333,0.8,0.692	0.392	43	6	43	9	49	11
41351	ENSG00000130413	STK33	chr11	-	8480533	8480614	8477249	8477283	8594082	8594160	41351	82	58	59	0	13	13	34	14	50	19	19	15	230	150	0.000205288	0.0104466	1.0,0.744,0.747	0.539,0.325,0.685	0.314	82	53	71	33	72	65
41942	ENSG00000228794	LINC01128	chr1	+	829002	829104	826831	826923	851926	852110	41942	24	8	19	0	0	2	21	6	17	2	2	5	251	150	0.000290669	0.0135909	1.0,1.0,0.85	0.863,0.642,0.67	0.225	24	23	8	8	21	22
42575	ENSG00000254851	AP005018.2	chr11	+	117137422	117137516	117136518	117136613	117137784	117137902	42575	17	13	443	0	0	0	2	7	10	0	16	1	243	150	0.000185183	0.00962876	1.0,1.0,1.0	1.0,0.213,0.861	0.309	17	2	13	23	443	11
42717	ENSG00000124831	LRRFIP1	chr2	+	237727875	237727935	237708543	237708630	237735588	237735676	42717	7	17	7	1	3	0	15	11	4	11	5	3	209	150	0.000563041	0.0220139	0.834,0.803,1.0	0.495,0.612,0.489	0.347	8	26	20	16	7	7
43166	ENSG00000106100	NOD1	chr7	-	30435997	30436081	30429373	30429457	30446140	30446224	43166	7	6	10	0	0	0	16	11	11	2	6	0	233	150	7.15843e-05	0.0046508	1.0,1.0,1.0	0.837,0.541,1.0	0.207	7	18	6	17	10	11
43285	ENSG00000284691	AC073111.5	chr7	+	150407583	150408488	150405145	150405317	150410159	150410249	43285	69	56	69	1	4	1	68	47	107	26	10	14	300	150	1.18829e-07	2.31307e-05	0.972,0.875,0.972	0.567,0.701,0.793	0.253	70	94	60	57	70	121
43366	ENSG00000128604	IRF5	chr7	+	128941278	128941424	128938216	128938245	128942070	128942276	43366	26	54	7	12	6	17	8	19	18	22	49	56	295	150	0.00140592	0.043575	0.524,0.821,0.173	0.156,0.165,0.14	0.352	38	30	60	68	24	74
43905	ENSG00000132128	LRRC41	chr1	-	46280191	46280290	46279181	46279257	46281124	46281161	43905	3	7	3	0	0	0	10	5	0	0	2	3	248	150	0.000790187	0.028474	1.0,1.0,1.0	1.0,0.602,0.0	0.466	3	10	7	7	3	3
43980	ENSG00000284713	SMIM38	chr11	+	69157173	69159351	69155909	69156114	69159445	69159752	43980	206	269	173	4	4	2	56	60	64	24	12	29	300	150	0	0	0.963,0.971,0.977	0.538,0.714,0.525	0.378	210	80	273	72	175	93
44045	ENSG00000158458	NRG2	chr5	-	139865114	139865173	139855675	139855778	139871720	139871841	44045	3	12	13	0	0	0	2	1	6	2	4	0	208	150	0.000137563	0.00763165	1.0,1.0,1.0	0.419,0.153,1.0	0.476	3	4	12	5	13	6
44590	ENSG00000113761	ZNF346	chr5	+	177023159	177023234	177022734	177022913	177062057	177062151	44590	11	12	6	0	0	0	4	4	8	8	0	6	224	150	6.14418e-07	9.30425e-05	1.0,1.0,1.0	0.251,1.0,0.472	0.426	11	12	12	4	6	14
44599	ENSG00000113761	ZNF346	chr5	+	177041777	177041870	177022695	177022913	177062057	177062151	44599	17	15	17	0	0	0	12	10	7	8	0	6	242	150	3.91168e-07	6.39818e-05	1.0,1.0,1.0	0.482,1.0,0.42	0.366	17	20	15	10	17	13
44696	ENSG00000158483	FAM86C1	chr11	+	71791735	71791819	71789782	71789845	71793379	71793481	44696	33	34	48	4	8	1	20	14	23	8	8	8	233	150	0.000947713	0.0327608	0.842,0.732,0.969	0.617,0.53,0.649	0.249	37	28	42	22	49	31
44815	ENSG00000143624	INTS3	chr1	+	153760310	153760390	153757571	153757763	153762727	153762847	44815	2	8	2	0	0	0	2	3	2	4	3	2	229	150	2.40619e-10	8.46369e-08	1.0,1.0,1.0	0.247,0.396,0.396	0.654	2	6	8	6	2	4
44846	ENSG00000161405	IKZF3	chr17	-	39777884	39778010	39757720	39766493	39788257	39788374	44846	6	4	9	0	4	0	4	3	0	2	5	4	275	150	0.00079062	0.0284756	1.0,0.353,1.0	0.522,0.247,0.0	0.528	6	6	8	8	9	4
45601	ENSG00000100083	GGA1	chr22	+	37613023	37613191	37608844	37608903	37614193	37614274	45601	4	8	2	0	2	0	4	0	6	1	4	3	300	150	0.000204073	0.0104006	1.0,0.667,1.0	0.667,0.0,0.5	0.5	4	5	10	4	2	9
46043	ENSG00000137073	UBAP2	chr9	-	33928371	33928612	33927796	33927992	33933489	33933628	46043	20	21	15	1	0	2	4	10	14	11	8	12	300	150	3.8139e-10	1.30046e-07	0.909,1.0,0.789	0.154,0.385,0.368	0.597	21	15	21	18	17	26
46351	ENSG00000134470	IL15RA	chr10	-	5968593	5968703	5966144	5966339	5968775	5968928	46351	6	1	7	10	10	5	0	0	2	9	9	9	259	150	9.72086e-05	0.00584581	0.258,0.055,0.448	0.0,0.0,0.114	0.216	16	9	11	9	12	11
46762	ENSG00000139531	SUOX	chr12	+	55999332	55999458	55997614	55997723	56001885	56001948	46762	17	17	20	0	1	0	21	12	11	0	4	4	275	150	0.00011522	0.00666689	1.0,0.903,1.0	1.0,0.621,0.6	0.227	17	21	18	16	20	15
46764	ENSG00000139531	SUOX	chr12	+	55999332	55999590	55997614	55997723	56001885	56001948	46764	15	18	23	0	1	0	21	13	12	0	4	4	300	150	0.000109971	0.00642073	1.0,0.9,1.0	1.0,0.619,0.6	0.227	15	21	19	17	23	16
46893	ENSG00000164073	MFSD8	chr4	-	127939852	127939997	127932984	127933093	127943751	127943992	46893	9	12	6	0	0	2	6	8	4	4	2	2	294	150	0.00031973	0.0145825	1.0,1.0,0.605	0.434,0.671,0.505	0.332	9	10	12	10	8	6
47330	ENSG00000215837	SDHAP2	chr3	+	195661755	195661841	195658095	195658165	195662570	195662733	47330	92	73	63	0	0	0	35	22	60	13	14	22	235	150	0	0	1.0,1.0,1.0	0.632,0.501,0.635	0.411	92	48	73	36	63	82
47470	ENSG00000136098	NEK3	chr13	-	52141019	52141069	52136799	52136902	52143915	52143987	47470	11	12	19	0	0	0	15	10	30	10	4	19	199	150	1.41096e-11	6.01898e-09	1.0,1.0,1.0	0.531,0.653,0.543	0.424	11	25	12	14	19	49
48957	ENSG00000163870	TPRA1	chr3	-	127595451	127595690	127594799	127594933	127598195	127598251	48957	14	6	2	2	0	0	15	13	8	5	16	4	300	150	1.63008e-05	0.00141095	0.778,1.0,1.0	0.6,0.289,0.5	0.463	16	20	6	29	2	12
49464	ENSG00000089063	TMEM230	chr20	-	5111763	5111808	5109331	5109445	5112742	5112904	49464	8	10	11	24	16	21	3	1	4	38	14	27	194	150	4.44095e-05	0.00318452	0.205,0.326,0.288	0.058,0.052,0.103	0.202	32	41	26	15	32	31
49546	ENSG00000187097	ENTPD5	chr14	-	74007695	74007812	73987885	73988172	74011090	74011150	49546	4	11	13	8	17	11	4	4	0	13	16	19	266	150	0.00025444	0.0123701	0.22,0.267,0.4	0.148,0.124,0.0	0.205	12	17	28	20	24	19
50312	ENSG00000169084	DHRSX	chrX	-	2392353	2392474	2291501	2291603	2425196	2425304	50312	42	44	35	1	0	0	32	23	45	3	9	4	270	150	5.58878e-07	8.67173e-05	0.959,1.0,1.0	0.856,0.587,0.862	0.218	43	35	44	32	35	49
51213	ENSG00000142185	TRPM2	chr21	+	44427009	44427111	44426659	44426736	44435130	44435217	51213	158	170	231	17	17	25	180	160	152	145	137	149	251	150	0	0	0.847,0.857,0.847	0.426,0.411,0.379	0.445	175	325	187	297	256	301
51513	ENSG00000181222	POLR2A	chr17	+	7508943	7509190	7503585	7503791	7511214	7511319	51513	6	15	2	0	1	2	9	0	0	4	2	5	300	150	0.000201316	0.0102914	1.0,0.882,0.333	0.529,0.0,0.0	0.562	6	13	16	2	4	5
51844	ENSG00000158806	NPM2	chr8	+	22024723	22024830	22024433	22024623	22025215	22025306	51844	10	11	18	1	1	2	7	11	14	8	6	11	256	150	1.11224e-05	0.00104303	0.854,0.866,0.841	0.339,0.518,0.427	0.426	11	15	12	17	20	25
51985	ENSG00000096996	IL12RB1	chr19	-	18090649	18090769	18083431	18083491	18098754	18098927	51985	62	62	82	1	0	5	69	8	57	6	6	9	269	150	0.000146648	0.00802464	0.972,1.0,0.901	0.865,0.426,0.779	0.268	63	75	62	14	87	66
52069	ENSG00000205746	AC126755.1	chr16	-	18349932	18350153	18349628	18349744	18350587	18350771	52069	45	32	32	0	0	3	25	31	91	26	1	8	300	150	0.000416677	0.0176857	1.0,1.0,0.842	0.325,0.939,0.85	0.243	45	51	32	32	35	99
52073	ENSG00000205746	AC126755.1	chr16	-	18352211	18352283	18351773	18351943	18352404	18352476	52073	8	48	17	33	38	35	2	0	4	38	58	51	221	150	1.05137e-10	3.91812e-08	0.141,0.462,0.248	0.034,0.0,0.051	0.255	41	40	86	58	52	55
52165	ENSG00000136986	DERL1	chr8	-	123021446	123021499	123013163	123015585	123041969	123042302	52165	2	1	4	0	1	0	2	0	2	2	2	2	202	150	9.04544e-06	0.000881235	1.0,0.426,1.0	0.426,0.0,0.426	0.525	2	4	2	2	4	4
53446	ENSG00000155849	ELMO1	chr7	-	37393821	37393917	37342612	37342763	37448859	37448950	53446	2	4	5	5	7	8	2	0	0	9	7	9	245	150	0.000104919	0.00619066	0.197,0.259,0.277	0.12,0.0,0.0	0.204	7	11	11	7	13	9
54394	ENSG00000227879	PSPC1P1	chr13	-	19219709	19219775	19208482	19208540	19227247	19227432	54394	6	7	10	0	0	0	19	42	33	6	6	6	215	150	2.63696e-06	0.000325554	1.0,1.0,1.0	0.688,0.83,0.793	0.23	6	25	7	48	10	39
54958	ENSG00000254485	AC026191.1	chr3	-	9355800	9355859	9349684	9350066	9362839	9363006	54958	6	24	12	1	1	0	4	3	10	2	5	0	208	150	0.0013475	0.0422665	0.812,0.945,1.0	0.591,0.302,1.0	0.288	7	6	25	8	12	10
55694	ENSG00000143493	INTS7	chr1	-	211968512	211968707	211952426	211952701	211976581	211976719	55694	9	7	9	0	1	0	2	2	3	4	2	0	300	150	9.69347e-05	0.00583634	1.0,0.778,1.0	0.2,0.333,1.0	0.415	9	6	8	4	9	3
55859	ENSG00000159445	THEM4	chr1	-	151889982	151890214	151889213	151889373	151895007	151895194	55859	130	154	127	49	36	48	92	79	112	112	105	125	300	150	2.88658e-15	2.19223e-12	0.57,0.681,0.57	0.291,0.273,0.309	0.316	179	204	190	184	175	237
56013	ENSG00000136052	SLC41A2	chr12	-	104931631	104931791	104928299	104928694	104958600	104958698	56013	15	6	9	1	0	0	6	3	2	3	0	2	300	150	0.00110377	0.0364565	0.882,1.0,1.0	0.5,1.0,0.333	0.35	16	9	6	3	9	4
56404	ENSG00000163071	SPATA18	chr4	+	52069820	52069916	52051415	52051791	52071916	52072013	56404	22	25	16	4	8	3	2	2	2	6	2	2	245	150	0.000385847	0.0167375	0.771,0.657,0.766	0.169,0.38,0.38	0.422	26	8	33	4	19	4
56859	ENSG00000205583	STAG3L1	chr7	+	75364632	75364756	75361971	75362088	75365254	75365353	56859	12	76	15	8	58	10	7	11	34	55	27	27	273	150	0.00107403	0.035735	0.452,0.419,0.452	0.065,0.183,0.409	0.222	20	62	134	38	25	61
57746	ENSG00000151575	TEX9	chr15	+	56389317	56389400	56365446	56365670	56412301	56412436	57746	9	12	5	2	2	11	0	5	11	27	8	25	232	150	0.00106997	0.0356589	0.744,0.795,0.227	0.0,0.288,0.221	0.419	11	27	14	13	16	36
58196	ENSG00000232677	LINC00665	chr19	-	36322129	36322225	36321992	36322030	36330252	36330492	58196	19	10	28	0	4	0	10	2	18	4	5	6	245	150	0.000470826	0.0193786	1.0,0.605,1.0	0.605,0.197,0.647	0.385	19	14	14	7	28	24
60604	ENSG00000122481	RWDD3	chr1	+	95237347	95237460	95234213	95234315	95246755	95247225	60604	9	6	10	7	7	10	2	2	0	22	20	22	262	150	6.98676e-10	2.2667e-07	0.424,0.329,0.364	0.049,0.054,0.0	0.338	16	24	13	22	20	22
60610	ENSG00000122481	RWDD3	chr1	+	95244210	95244698	95234154	95234315	95246755	95247217	60610	84	48	77	7	7	10	82	63	52	22	20	22	300	150	5.89598e-05	0.00399095	0.857,0.774,0.794	0.651,0.612,0.542	0.207	91	104	55	83	87	74
60772	ENSG00000213468	FIRRE	chrX	-	131743095	131743248	131691529	131692636	131749305	131749458	60772	20	10	6	11	3	8	0	3	0	4	1	5	300	150	0.00104749	0.0351907	0.476,0.625,0.273	0.0,0.6,0.0	0.258	31	4	13	4	14	5
61218	ENSG00000138111	MFSD13A	chr10	+	102465981	102466087	102461394	102461450	102468954	102469197	61218	11	28	30	3	0	0	41	38	55	15	13	9	255	150	3.75365e-05	0.00279031	0.683,1.0,1.0	0.617,0.632,0.782	0.217	14	56	28	51	30	64
61222	ENSG00000138111	MFSD13A	chr10	+	102468752	102468842	102461412	102461450	102468954	102469197	61222	13	6	10	3	0	0	6	6	10	15	13	9	239	150	3.99294e-08	8.68296e-06	0.731,1.0,1.0	0.201,0.225,0.411	0.631	16	21	6	19	10	19
61551	ENSG00000119725	ZNF410	chr14	+	73922065	73922206	73920145	73921105	73923394	73923522	61551	479	448	531	75	64	117	366	269	426	198	167	122	290	150	1.3204e-07	2.5165e-05	0.768,0.784,0.701	0.489,0.454,0.644	0.222	554	564	512	436	648	548
62485	ENSG00000080503	SMARCA2	chr9	+	2159813	2159909	2157682	2157890	2161685	2161903	62485	46	46	61	4	5	5	33	11	22	12	2	10	245	150	0.000437071	0.0183252	0.876,0.849,0.882	0.627,0.771,0.574	0.212	50	45	51	13	66	32
62486	ENSG00000080503	SMARCA2	chr9	+	2159813	2159909	2158238	2158392	2161685	2161903	62486	46	46	61	0	0	0	32	11	22	0	8	1	245	150	0.00057541	0.0223234	1.0,1.0,1.0	1.0,0.457,0.931	0.204	46	32	46	19	61	23
63109	ENSG00000076662	ICAM3	chr19	-	10339017	10339245	10338681	10338863	10339538	10339624	63109	101	107	52	17	6	5	8	12	12	13	7	10	300	150	4.39684e-09	1.23813e-06	0.748,0.899,0.839	0.235,0.462,0.375	0.471	118	21	113	19	57	22
63887	ENSG00000174652	ZNF266	chr19	-	9418765	9418895	9418504	9418631	9419216	9419299	63887	81	95	89	22	24	17	66	46	88	42	44	59	279	150	1.11535e-08	2.85235e-06	0.664,0.68,0.738	0.458,0.36,0.445	0.273	103	108	119	90	106	147
64805	ENSG00000172123	SLFN12	chr17	-	35432187	35432257	35422682	35423068	35432904	35433145	64805	137	132	155	39	47	43	94	65	96	86	47	61	219	150	2.24886e-08	5.31708e-06	0.706,0.658,0.712	0.428,0.486,0.519	0.214	176	180	179	112	198	157
65757	ENSG00000179406	LINC00174	chr7	-	66467681	66467719	66450070	66450236	66476258	66476327	65757	19	10	9	16	5	12	2	7	0	10	19	9	187	150	0.000178708	0.00937476	0.488,0.616,0.376	0.138,0.228,0.0	0.371	35	12	15	26	21	9
65818	ENSG00000074319	TSG101	chr11	-	18516098	18516164	18509541	18509665	18526774	18526821	65818	10	6	8	0	2	6	4	0	1	4	4	3	215	150	0.000928958	0.0322347	1.0,0.677,0.482	0.411,0.0,0.189	0.52	10	8	8	4	14	4
65897	ENSG00000145214	DGKQ	chr4	-	966063	966301	965490	965529	966465	966527	65897	28	4	17	0	0	0	18	12	14	0	4	2	300	150	0.00147205	0.0450527	1.0,1.0,1.0	1.0,0.6,0.778	0.207	28	18	4	16	17	16
65999	ENSG00000155189	AGPAT5	chr8	+	6741660	6741751	6708356	6708887	6755050	6755174	65999	6	0	7	0	6	2	2	0	0	6	2	3	240	150	0.00053975	0.0213447	1.0,0.0,0.686	0.172,0.0,0.0	0.505	6	8	6	2	9	3
66811	ENSG00000160932	LY6E	chr8	+	143020261	143020377	143018832	143019119	143020887	143020991	66811	20	19	29	0	4	0	19	27	25	11	8	10	265	150	1.4973e-05	0.00132078	1.0,0.729,1.0	0.494,0.656,0.586	0.331	20	30	23	35	29	35
66964	ENSG00000172765	TMCC1	chr3	-	129860939	129861012	129857249	129857405	129893493	129893606	66964	15	2	6	0	0	0	4	4	7	5	3	0	222	150	7.48295e-06	0.000753163	1.0,1.0,1.0	0.351,0.474,1.0	0.392	15	9	2	7	6	7
67389	ENSG00000172053	QARS	chr3	-	49099329	49099431	49099109	49099253	49099960	49100091	67389	13	19	13	0	0	0	4	13	6	4	0	2	251	150	0.000435191	0.0182616	1.0,1.0,1.0	0.374,1.0,0.642	0.328	13	8	19	13	13	8
67459	ENSG00000157578	LCA5L	chr21	-	39428171	39428503	39421559	39423490	39429130	39429211	67459	1	5	7	4	4	0	0	0	2	4	3	2	300	150	0.000578801	0.0224376	0.111,0.385,1.0	0.0,0.0,0.333	0.388	5	4	9	3	7	4
67713	ENSG00000062822	POLD1	chr19	+	50395024	50395150	50384341	50384390	50401777	50401924	67713	11	26	13	0	3	2	17	6	11	5	4	8	275	150	0.000733738	0.0270029	1.0,0.825,0.78	0.65,0.45,0.429	0.359	11	22	29	10	15	19
67730	ENSG00000245479	LINC01585	chr15	+	90661392	90661483	90660233	90660824	90664354	90664967	67730	2	6	5	0	1	3	2	2	2	3	4	7	240	150	0.000977634	0.0335087	1.0,0.789,0.51	0.294,0.238,0.152	0.538	2	5	7	6	8	9
68706	ENSG00000109586	GALNT7	chr4	+	173297794	173297977	173295395	173295526	173298114	173298297	68706	3	3	1	2	11	3	0	0	0	8	4	3	300	150	0.000901843	0.031534	0.429,0.12,0.143	0.0,0.0,0.0	0.231	5	8	14	4	4	3
69042	ENSG00000267750	RUNDC3A-AS1	chr17	-	44304980	44305043	44302516	44304207	44307291	44307500	69042	5	8	1	8	14	7	0	0	0	10	2	5	212	150	1.02596e-06	0.000145681	0.307,0.288,0.092	0.0,0.0,0.0	0.229	13	10	22	2	8	5
69429	ENSG00000232593	KANTR	chrX	+	53094399	53094474	53094144	53094284	53141847	53142707	69429	4	7	12	0	0	0	3	7	6	5	2	0	224	150	0.000115763	0.00667577	1.0,1.0,1.0	0.287,0.701,1.0	0.337	4	8	7	9	12	6
69531	ENSG00000123600	METTL8	chr2	-	171414602	171414726	171360421	171360513	171433882	171434087	69531	94	149	109	0	0	43	96	56	79	20	21	29	273	150	5.59824e-05	0.0038308	1.0,1.0,0.582	0.725,0.594,0.599	0.221	94	116	149	77	152	108
69799	ENSG00000171456	ASXL1	chr20	+	32360709	32360806	32358965	32359851	32366383	32366466	69799	34	31	40	0	19	0	66	77	69	32	40	64	246	150	0.000145264	0.00797067	1.0,0.499,1.0	0.557,0.54,0.397	0.335	34	98	50	117	40	133
69801	ENSG00000171456	ASXL1	chr20	+	32360709	32360806	32359236	32359642	32366383	32366466	69801	34	26	40	19	13	10	55	68	71	83	63	72	246	150	0.000198821	0.0101951	0.522,0.549,0.709	0.288,0.397,0.376	0.24	53	138	39	131	50	143
69995	ENSG00000172775	FAM192A	chr16	-	57174619	57174688	57173727	57173869	57181553	57181790	69995	18	21	28	2	0	6	40	16	25	15	12	26	218	150	2.41908e-05	0.00194318	0.861,1.0,0.763	0.647,0.478,0.398	0.367	20	55	21	28	34	51
70019	ENSG00000172775	FAM192A	chr16	-	57178501	57178852	57174168	57174286	57185820	57186039	70019	30	45	51	0	2	2	21	29	38	14	17	14	300	150	1.36291e-12	6.97087e-10	1.0,0.918,0.927	0.429,0.46,0.576	0.46	30	35	47	46	53	52
70034	ENSG00000172775	FAM192A	chr16	-	57178805	57178852	57174168	57174286	57185820	57186031	70034	8	12	6	0	2	2	3	8	9	14	17	14	196	150	1.31636e-07	2.51356e-05	1.0,0.821,0.697	0.141,0.265,0.33	0.594	8	17	14	25	8	23
70742	ENSG00000169919	GUSB	chr7	-	65976014	65976202	65967730	65967907	65981973	65982088	70742	2	2	2	0	0	0	0	0	2	3	2	0	300	150	1.2017e-07	2.33013e-05	1.0,1.0,1.0	0.0,0.0,1.0	0.667	2	3	2	2	2	2
70966	ENSG00000113810	SMC4	chr3	+	160400627	160400965	160399665	160399749	160402675	160402867	70966	3	3	4	0	0	0	2	0	1	0	2	2	300	150	2.80105e-05	0.0021919	1.0,1.0,1.0	1.0,0.0,0.2	0.6	3	2	3	2	4	3
71133	ENSG00000214078	CPNE1	chr20	-	35626734	35626826	35626043	35626381	35627279	35627399	71133	18	18	28	0	2	1	19	16	30	4	6	6	241	150	0.000110778	0.0064603	1.0,0.849,0.946	0.747,0.624,0.757	0.222	18	23	20	22	29	36
71286	ENSG00000156958	GALK2	chr15	+	49161739	49161861	49155758	49156016	49201161	49201250	71286	28	52	44	37	42	54	18	5	8	49	36	44	271	150	3.05138e-08	6.82801e-06	0.295,0.407,0.311	0.169,0.071,0.091	0.227	65	67	94	41	98	52
71288	ENSG00000156958	GALK2	chr15	+	49161763	49161861	49155655	49156016	49201161	49201250	71288	20	26	31	37	42	54	6	0	6	49	36	44	247	150	1.9638e-10	7.10712e-08	0.247,0.273,0.259	0.069,0.0,0.076	0.211	57	55	68	36	85	50
71544	ENSG00000188234	AGAP4	chr10	-	45848842	45848912	45847124	45847312	45853654	45853875	71544	11	5	13	1	0	0	3	0	2	1	3	2	219	150	1.47071e-06	0.000197636	0.883,1.0,1.0	0.673,0.0,0.407	0.601	12	4	5	3	13	4
71545	ENSG00000188234	AGAP4	chr10	-	45848842	45848912	45847859	45847954	45853654	45853875	71545	26	18	29	3	7	3	3	0	4	17	7	16	219	150	1.9873e-14	1.35526e-11	0.856,0.638,0.869	0.108,0.0,0.146	0.703	29	20	25	7	32	20
71597	ENSG00000149182	ARFGAP2	chr11	-	47175181	47175313	47172280	47172333	47176515	47176634	71597	3	4	4	4	7	5	0	0	0	4	3	2	281	150	4.65237e-06	0.000513081	0.286,0.234,0.299	0.0,0.0,0.0	0.273	7	4	11	3	9	2
71664	ENSG00000106459	NRF1	chr7	+	129630077	129630168	129611738	129611824	129641724	129641822	71664	6	6	10	0	1	1	13	13	7	14	10	18	240	150	8.19582e-08	1.64983e-05	1.0,0.789,0.862	0.367,0.448,0.196	0.547	6	27	7	23	11	25
72119	ENSG00000226025	LGALS17A	chr19	+	39683486	39683763	39681997	39682208	39685301	39685418	72119	9	14	25	19	4	4	0	0	0	3	4	4	300	150	4.71096e-09	1.3155e-06	0.191,0.636,0.758	0.0,0.0,0.0	0.528	28	3	18	4	29	4
72737	ENSG00000108352	RAPGEFL1	chr17	+	40181298	40181373	40178248	40178381	40181615	40181694	72737	4	5	0	1	1	3	1	0	0	5	3	7	224	150	7.50948e-05	0.00484332	0.728,0.77,0.0	0.118,0.0,0.0	0.46	5	6	6	3	3	7
73389	ENSG00000162994	CLHC1	chr2	-	55208625	55208710	55206817	55206940	55209629	55209831	73389	2	11	8	0	0	0	8	7	4	5	2	0	234	150	5.0799e-05	0.00354138	1.0,1.0,1.0	0.506,0.692,1.0	0.267	2	13	11	9	8	4
73437	ENSG00000242086	MUC20-OT1	chr3	+	195696360	195696589	195688532	195688797	195708133	195708268	73437	4	15	3	0	0	0	6	0	3	0	3	2	300	150	0.000108651	0.00636218	1.0,1.0,1.0	1.0,0.0,0.429	0.524	4	6	15	3	3	5
73443	ENSG00000242086	MUC20-OT1	chr3	+	195699029	195699207	195688532	195688797	195708133	195708268	73443	6	6	4	0	0	0	2	4	1	0	3	2	300	150	0.000282512	0.0133335	1.0,1.0,1.0	1.0,0.4,0.2	0.467	6	2	6	7	4	3
73520	ENSG00000168734	PKIG	chr20	+	44582584	44582731	44531784	44531978	44589796	44589866	73520	220	231	175	35	79	59	182	133	202	175	105	199	296	150	2.58552e-11	1.04513e-08	0.761,0.597,0.6	0.345,0.391,0.34	0.294	255	357	310	238	234	401
74676	ENSG00000248309	MEF2C-AS1	chr5	+	89150723	89150777	89150532	89150595	89168249	89168668	74676	10	16	22	11	26	27	10	3	3	19	18	26	203	150	0.00140751	0.0435763	0.402,0.313,0.376	0.28,0.11,0.079	0.207	21	29	42	21	49	29
75378	ENSG00000196262	PPIA	chr7	+	44800423	44800543	44799391	44799480	44801286	44801624	75378	93	73	110	9	22	19	135	103	134	73	50	66	269	150	7.82257e-06	0.00077952	0.852,0.649,0.764	0.508,0.535,0.531	0.23	102	208	95	153	129	200
75399	ENSG00000112078	KCTD20	chr6	+	36465600	36465698	36443417	36443530	36470051	36470257	75399	24	30	29	0	1	6	28	32	39	11	6	12	247	150	0.0015443	0.046743	1.0,0.948,0.746	0.607,0.764,0.664	0.22	24	39	31	38	35	51
76330	ENSG00000122483	CCDC18	chr1	+	93183359	93183495	93179929	93180279	93186344	93186400	76330	31	21	18	0	0	0	20	19	10	0	6	6	285	150	1.08754e-06	0.000153339	1.0,1.0,1.0	1.0,0.625,0.467	0.303	31	20	21	25	18	16
76432	ENSG00000186628	FSD2	chr15	-	82782794	82783025	82780244	82780267	82786510	82786606	76432	21	41	27	0	4	0	39	25	30	10	7	7	300	150	2.28148e-05	0.00185344	1.0,0.837,1.0	0.661,0.641,0.682	0.284	21	49	45	32	27	37
77092	ENSG00000245060	LINC00847	chr5	+	180831735	180831806	180831038	180831229	180832672	180832860	77092	17	20	1	0	0	1	7	4	10	7	6	3	220	150	2.63598e-06	0.000325554	1.0,1.0,0.405	0.405,0.313,0.694	0.331	17	14	20	10	2	13
77160	ENSG00000261218	AC099524.1	chr16	+	81740263	81740379	81739081	81739385	81755869	81755966	77160	8	0	10	0	10	13	2	0	0	5	10	6	265	150	0.0013951	0.0433663	1.0,0.0,0.303	0.185,0.0,0.0	0.373	8	7	10	10	23	6
77161	ENSG00000261218	AC099524.1	chr16	+	81740263	81740379	81739336	81739436	81755869	81755966	77161	8	0	12	2	7	2	2	0	0	3	4	2	265	150	0.00055419	0.0217674	0.694,0.0,0.773	0.274,0.0,0.0	0.398	10	5	7	4	14	2
77728	ENSG00000166503	HDGFL3	chr15	-	83189360	83189516	83164038	83164075	83192251	83192308	77728	5	12	11	29	22	6	1	0	0	7	5	4	300	150	1.50811e-05	0.00132618	0.079,0.214,0.478	0.067,0.0,0.0	0.235	34	8	34	5	17	4
77856	ENSG00000111711	GOLT1B	chr12	+	21507943	21508109	21506884	21506976	21512294	21512376	77856	35	34	50	16	9	24	13	22	40	28	24	33	300	150	0.000234128	0.0115734	0.522,0.654,0.51	0.188,0.314,0.377	0.269	51	41	43	46	74	73
79562	ENSG00000153187	HNRNPU	chr1	-	244848787	244848856	244846603	244846706	244854972	244855044	79562	10	25	39	0	0	0	20	7	19	41	0	36	218	150	3.05076e-08	6.82801e-06	1.0,1.0,1.0	0.251,1.0,0.266	0.494	10	61	25	7	39	55
79615	ENSG00000148700	ADD3	chr10	+	110079239	110079297	110077004	110077118	110100624	110100704	79615	41	58	67	49	45	45	36	8	37	79	69	93	207	150	5.49225e-08	1.16403e-05	0.377,0.483,0.519	0.248,0.078,0.224	0.276	90	115	103	77	112	130
80364	ENSG00000114126	TFDP2	chr3	-	142054114	142054149	142005440	142005544	142101734	142101841	80364	5	6	15	0	0	0	11	6	8	0	6	1	184	150	0.00104707	0.0351882	1.0,1.0,1.0	1.0,0.449,0.867	0.228	5	11	6	12	15	9
80491	ENSG00000182389	CACNB4	chr2	-	151869176	151869193	151860710	151860820	151870530	151870611	80491	5	11	6	3	5	8	3	2	5	18	7	10	166	150	0.00119081	0.0384431	0.601,0.665,0.404	0.131,0.205,0.311	0.341	8	21	16	9	14	15
80775	ENSG00000166888	STAT6	chr12	-	57110076	57110110	57108162	57108299	57110381	57110543	80775	8	11	3	2	13	5	1	0	1	3	2	5	183	150	8.38897e-05	0.00528252	0.766,0.41,0.33	0.215,0.0,0.141	0.383	10	4	24	2	8	6
81384	ENSG00000280987	MATR3	chr5	+	139283530	139283601	139279934	139280058	139307238	139307714	81384	7	4	11	5	9	0	0	3	1	6	6	14	220	150	0.000173019	0.00915294	0.488,0.233,1.0	0.0,0.254,0.046	0.474	12	6	13	9	11	15
81714	ENSG00000247708	STX18-AS1	chr4	+	4705672	4705910	4649372	4649542	4709515	4710938	81714	12	23	11	0	2	0	6	8	23	3	0	5	300	150	0.0010728	0.0357286	1.0,0.852,1.0	0.5,1.0,0.697	0.218	12	9	25	8	11	28
81789	ENSG00000068400	GRIPAP1	chrX	-	48981794	48981872	48981595	48981691	48982978	48983092	81789	943	993	1072	35	19	31	590	542	680	161	155	195	227	150	0	0	0.947,0.972,0.958	0.708,0.698,0.697	0.258	978	751	1012	697	1103	875
81911	ENSG00000221955	SLC12A8	chr3	-	125211298	125211394	125190374	125190521	125212699	125212765	81911	15	20	16	2	0	0	4	8	11	6	0	2	245	150	0.00110401	0.0364565	0.821,1.0,1.0	0.29,1.0,0.771	0.253	17	10	20	8	16	13
83088	ENSG00000116983	HPCAL4	chr1	-	39691064	39691170	39684441	39684611	39691305	39691485	83088	23	32	15	12	17	13	0	0	2	2	2	4	255	150	1.41098e-05	0.00125602	0.53,0.525,0.404	0.0,0.0,0.227	0.411	35	2	49	2	28	6
83136	ENSG00000154059	IMPACT	chr18	+	24427918	24428047	24426615	24426792	24428868	24428921	83136	296	243	333	0	0	0	39	35	41	12	4	11	278	150	0	0	1.0,1.0,1.0	0.637,0.825,0.668	0.29	296	51	243	39	333	52
83626	ENSG00000249069	LINC01033	chr5	+	54396996	54397134	54390837	54390933	54401642	54401829	83626	2	4	2	0	1	0	11	13	17	5	4	3	287	150	0.000166652	0.00886761	1.0,0.676,1.0	0.535,0.629,0.748	0.255	2	16	5	17	2	20
84339	ENSG00000167515	TRAPPC2L	chr16	+	88859344	88859443	88858618	88858789	88859572	88859750	84339	35	33	46	0	0	0	36	6	37	3	2	14	248	150	5.56872e-09	1.51782e-06	1.0,1.0,1.0	0.879,0.645,0.615	0.287	35	39	33	8	46	51
84366	ENSG00000104133	SPG11	chr15	-	44573546	44573745	44570524	44570658	44583813	44584558	84366	2	2	17	0	0	0	2	0	6	1	2	4	300	150	2.4213e-08	5.65795e-06	1.0,1.0,1.0	0.5,0.0,0.429	0.69	2	3	2	2	17	10
84847	ENSG00000164031	DNAJB14	chr4	-	99924759	99924815	99923039	99923185	99946438	99946558	84847	1	2	2	2	0	0	3	3	3	6	4	8	205	150	0.00105209	0.0352624	0.268,1.0,1.0	0.268,0.354,0.215	0.477	3	9	2	7	2	11
84962	ENSG00000149311	ATM	chr11	+	108224783	108224871	108224077	108224136	108227594	108227696	84962	12	6	17	1	2	0	1	1	6	2	1	3	237	150	0.000981684	0.0336221	0.884,0.655,1.0	0.24,0.388,0.559	0.451	13	3	8	2	17	9
85114	ENSG00000118495	PLAGL1	chr6	-	143966157	143966230	143964786	143964818	143968906	143968978	85114	77	66	61	27	22	26	48	27	29	35	22	30	222	150	0.000107333	0.0062899	0.658,0.67,0.613	0.481,0.453,0.395	0.204	104	83	88	49	87	59
85115	ENSG00000118495	PLAGL1	chr6	-	143966157	143966285	143964786	143964818	143968906	143968978	85115	81	66	68	27	22	26	54	25	34	35	22	30	277	150	0.000149641	0.00814396	0.619,0.619,0.586	0.455,0.381,0.38	0.203	108	89	88	47	94	64
85767	ENSG00000213753	CENPBD1P1	chr19	+	58591497	58591624	58575444	58575588	58598966	58599801	85767	17	21	17	28	9	35	5	3	6	40	31	37	276	150	4.46393e-06	0.000497222	0.248,0.559,0.209	0.064,0.05,0.081	0.274	45	45	30	34	52	43
85768	ENSG00000213753	CENPBD1P1	chr19	+	58591497	58591624	58586154	58586356	58598966	58599801	85768	28	22	23	13	18	17	1	1	6	30	21	15	276	150	1.37582e-11	5.89416e-09	0.539,0.399,0.424	0.018,0.025,0.179	0.38	41	31	40	22	40	21
85965	ENSG00000248508	SRP14-AS1	chr15	+	40056452	40056641	40045960	40046069	40056729	40057000	85965	14	29	15	1	0	0	17	4	12	2	1	3	300	150	0.000476553	0.0195393	0.875,1.0,1.0	0.81,0.667,0.667	0.244	15	19	29	5	15	15
86202	ENSG00000088543	C3orf18	chr3	-	50565465	50565861	50561721	50561747	50567462	50567665	86202	4	7	15	0	0	0	16	8	12	2	6	4	300	150	2.61716e-08	6.04527e-06	1.0,1.0,1.0	0.8,0.4,0.6	0.4	4	18	7	14	15	16
86477	ENSG00000163138	PACRGL	chr4	+	20702140	20702221	20700418	20700617	20704465	20704524	86477	24	9	30	2	8	13	4	2	0	10	11	5	230	150	2.49023e-06	0.000310853	0.887,0.423,0.601	0.207,0.106,0.0	0.533	26	14	17	13	43	5
86478	ENSG00000163138	PACRGL	chr4	+	20702140	20702221	20700457	20700787	20704465	20704524	86478	24	9	27	39	9	48	4	2	2	48	34	44	230	150	7.94953e-12	3.57365e-09	0.286,0.395,0.268	0.052,0.037,0.029	0.277	63	52	18	36	75	46
86480	ENSG00000163138	PACRGL	chr4	+	20702140	20702221	20700465	20700611	20704465	20704524	86480	25	9	27	12	22	15	4	2	2	25	5	18	230	150	1.67795e-05	0.00144511	0.576,0.211,0.54	0.094,0.207,0.068	0.319	37	29	31	7	42	20
86481	ENSG00000163138	PACRGL	chr4	+	20702140	20702221	20700480	20700578	20704465	20704524	86481	25	13	31	25	9	52	6	3	0	57	53	35	230	150	2.54241e-14	1.64433e-11	0.395,0.485,0.28	0.064,0.036,0.0	0.353	50	63	22	56	83	35
86482	ENSG00000163138	PACRGL	chr4	+	20702140	20702221	20701757	20701884	20704465	20704524	86482	29	16	30	0	2	2	5	2	0	3	7	5	230	150	2.3344e-09	6.94418e-07	1.0,0.839,0.907	0.521,0.157,0.0	0.689	29	8	18	9	32	5
86985	ENSG00000105341	DMAC2	chr19	-	41433271	41433434	41431318	41432408	41433536	41433673	86985	964	1131	1153	101	133	96	874	786	900	335	277	358	300	150	0	0	0.827,0.81,0.857	0.566,0.587,0.557	0.261	1065	1209	1264	1063	1249	1258
87203	ENSG00000187239	FNBP1	chr9	-	129923843	129923939	129915965	129915980	129924959	129925157	87203	53	64	54	0	0	21	73	67	87	34	27	23	245	150	0.000120449	0.00686845	1.0,1.0,0.612	0.568,0.603,0.698	0.248	53	107	64	94	75	110
87380	ENSG00000168646	AXIN2	chr17	-	65536868	65537063	65536319	65536553	65537323	65537835	87380	2	2	2	0	0	0	1	3	3	6	3	0	300	150	9.69965e-07	0.00013891	1.0,1.0,1.0	0.077,0.333,1.0	0.53	2	7	2	6	2	3
87713	ENSG00000165819	METTL3	chr14	-	21500912	21501129	21499763	21499802	21503172	21503577	87713	20	18	31	4	2	0	14	11	15	4	5	15	300	150	0.000161251	0.00864463	0.714,0.818,1.0	0.636,0.524,0.333	0.346	24	18	20	16	31	30
88154	ENSG00000204623	ZNRD1ASP	chr6	-	30035915	30035983	30021666	30021761	30058114	30058190	88154	12	7	13	1	0	2	3	7	10	3	5	6	217	150	3.67654e-05	0.00275049	0.892,1.0,0.818	0.409,0.492,0.535	0.425	13	6	7	12	15	16
88279	ENSG00000121964	GTDC1	chr2	-	143970652	143970762	143952772	143952843	144141881	144142055	88279	8	18	19	0	0	0	9	15	11	2	3	2	259	150	3.82352e-05	0.002824	1.0,1.0,1.0	0.723,0.743,0.761	0.258	8	11	18	18	19	13
88688	ENSG00000255693	LINC02389	chr12	+	64900576	64900698	64885193	64885300	64983057	64983153	88688	2	3	4	0	4	3	0	0	0	3	3	2	271	150	2.86313e-06	0.000347486	1.0,0.293,0.425	0.0,0.0,0.0	0.573	2	3	7	3	7	2
90222	ENSG00000205629	LCMT1	chr16	+	25132401	25132523	25111728	25111996	25164597	25164718	90222	9	2	5	2	0	0	10	15	5	5	4	1	271	150	0.00131622	0.0415063	0.714,1.0,1.0	0.525,0.675,0.735	0.26	11	15	2	19	5	6
90640	ENSG00000167261	DPEP2	chr16	-	67987851	67988057	67987396	67987760	67989322	67989398	90640	6	6	4	0	1	0	10	5	10	0	2	5	300	150	0.000116317	0.00669376	1.0,0.75,1.0	1.0,0.556,0.5	0.231	6	10	7	7	4	15
91060	ENSG00000055950	MRPL43	chr10	-	100984033	100984074	100983754	100983817	100986686	100986975	91060	4	15	17	28	1	3	2	4	2	36	35	37	190	150	8.88298e-06	0.000868781	0.101,0.922,0.817	0.042,0.083,0.041	0.558	32	38	16	39	20	39
91297	ENSG00000233695	GAS6-AS1	chr13	+	113834577	113834764	113833491	113833579	113838076	113838247	91297	27	18	16	0	0	1	36	30	54	10	14	13	300	150	4.05583e-09	1.15181e-06	1.0,1.0,0.889	0.643,0.517,0.675	0.351	27	46	18	44	17	67
91369	ENSG00000176732	PFN4	chr2	-	24122751	24122833	24122506	24122547	24123117	24123464	91369	5	0	6	1	7	3	0	0	1	7	7	8	231	150	4.85375e-05	0.00342233	0.765,0.0,0.565	0.0,0.0,0.075	0.418	6	7	7	7	9	9
91552	ENSG00000235978	AC018816.1	chr3	-	4825745	4825862	4814296	4814431	4830946	4831018	91552	20	3	3	1	0	1	14	14	13	4	7	5	266	150	0.000138752	0.0076761	0.919,1.0,0.628	0.664,0.53,0.595	0.253	21	18	3	21	4	18
91834	ENSG00000164749	HNF4G	chr8	+	75485784	75485816	75407913	75407964	75490088	75490208	91834	3	7	1	0	2	2	1	2	0	3	4	2	181	150	0.000890166	0.0312675	1.0,0.744,0.293	0.216,0.293,0.0	0.509	3	4	9	6	3	2
91989	ENSG00000131379	C3orf20	chr3	+	14726900	14727024	14721652	14721784	14728438	14728688	91989	31	60	51	2	2	0	0	0	0	14	6	13	273	150	0	0	0.895,0.943,1.0	0.0,0.0,0.0	0.946	33	14	62	6	51	13
92962	ENSG00000205643	CDPF1	chr22	-	46247109	46247221	46244012	46245238	46250255	46250311	92962	53	60	72	0	2	0	100	75	90	12	14	19	261	150	6.40509e-11	2.43219e-08	1.0,0.945,1.0	0.827,0.755,0.731	0.211	53	112	62	89	72	109
92964	ENSG00000205643	CDPF1	chr22	-	46248171	46248284	46244012	46245238	46250255	46250289	92964	23	37	27	0	2	0	9	23	35	12	14	19	262	150	9.69225e-14	5.649e-11	1.0,0.914,1.0	0.3,0.485,0.513	0.539	23	21	39	37	27	54
93202	ENSG00000007341	ST7L	chr1	-	112540778	112540872	112523517	112526111	112541950	112541975	93202	26	23	27	4	4	13	19	8	15	18	14	16	243	150	6.60263e-05	0.0043692	0.8,0.78,0.562	0.395,0.261,0.367	0.373	30	37	27	22	40	31
93267	ENSG00000140743	CDR2	chr16	-	22422160	22422214	22364901	22365014	22429795	22429948	93267	8	11	11	0	0	2	13	7	10	5	2	13	203	150	7.67214e-06	0.000768348	1.0,1.0,0.803	0.658,0.721,0.362	0.354	8	18	11	9	13	23
93517	ENSG00000247828	TMEM161B-AS1	chr5	+	88283009	88283086	88282041	88282106	88285740	88285851	93517	13	13	26	0	0	0	9	9	7	2	4	2	226	150	1.54654e-06	0.000205893	1.0,1.0,1.0	0.749,0.599,0.699	0.318	13	11	13	13	26	9
93526	ENSG00000247828	TMEM161B-AS1	chr5	+	88410072	88410194	88270525	88270585	88436272	88436602	93526	15	26	21	0	2	8	21	8	7	10	7	14	271	150	0.000287156	0.0134644	1.0,0.878,0.592	0.538,0.387,0.217	0.443	15	31	28	15	29	21
94221	ENSG00000169398	PTK2	chr8	-	140983841	140984155	140925688	140925749	141002013	141002216	94221	3	10	7	0	0	0	7	11	2	1	7	1	300	150	9.78578e-08	1.94644e-05	1.0,1.0,1.0	0.778,0.44,0.5	0.427	3	8	10	18	7	3
95342	ENSG00000121903	ZSCAN20	chr1	+	33489114	33489191	33488464	33488651	33489517	33489602	95342	24	43	29	2	0	0	22	28	23	9	7	6	226	150	1.45099e-08	3.65473e-06	0.888,1.0,1.0	0.619,0.726,0.718	0.275	26	31	43	35	29	29
95733	ENSG00000263753	LINC00667	chr18	+	5240186	5240277	5238779	5239049	5240647	5241255	95733	3	5	8	10	5	9	0	4	1	15	13	20	240	150	0.000242247	0.011916	0.158,0.385,0.357	0.0,0.161,0.03	0.236	13	15	10	17	17	21
95993	ENSG00000106123	EPHB6	chr7	+	142862016	142862133	142861051	142861186	142862755	142862833	95993	5	4	2	0	2	0	7	0	12	8	3	2	266	150	0.000593233	0.0228979	1.0,0.53,1.0	0.33,0.0,0.772	0.476	5	15	6	3	2	14
96211	ENSG00000108622	ICAM2	chr17	-	64007740	64007822	64006630	64006671	64020405	64020579	96211	4	2	6	3	0	0	9	0	0	0	2	8	231	150	0.00134343	0.0421522	0.464,1.0,1.0	1.0,0.0,0.0	0.488	7	9	2	2	6	8
96604	ENSG00000104863	LIN7B	chr19	+	49116262	49116472	49115225	49115331	49117854	49118015	96604	16	18	17	0	0	1	8	10	26	2	2	2	300	150	0.00125543	0.0401046	1.0,1.0,0.895	0.667,0.714,0.867	0.216	16	10	18	12	18	28
96622	ENSG00000126804	ZBTB1	chr14	+	64516599	64516751	64511248	64511384	64521486	64521606	96622	161	172	220	9	0	9	47	59	40	12	8	12	300	150	8.60416e-09	2.23459e-06	0.899,1.0,0.924	0.662,0.787,0.625	0.25	170	59	172	67	229	52
96734	ENSG00000267254	ZNF790-AS1	chr19	+	36801875	36801933	36797517	36797811	36827649	36828101	96734	10	12	20	0	2	0	7	6	7	6	0	4	207	150	0.000175233	0.00924081	1.0,0.813,1.0	0.458,1.0,0.559	0.265	10	13	14	6	20	11
97173	ENSG00000185324	CDK10	chr16	+	89687588	89687815	89686971	89687334	89689251	89689324	97173	46	43	47	2	8	10	40	39	46	18	21	19	300	150	0.000224834	0.0112146	0.92,0.729,0.701	0.526,0.481,0.548	0.265	48	58	51	60	57	65
97199	ENSG00000111788	AC009533.1	chr12	+	9309947	9310037	9307201	9307314	9310338	9310441	97199	10	10	15	0	0	2	9	4	1	7	0	3	239	150	0.000327523	0.0148568	1.0,1.0,0.825	0.447,1.0,0.173	0.402	10	16	10	4	17	4
97201	ENSG00000111788	AC009533.1	chr12	+	9311140	9311290	9310338	9310441	9311549	9311618	97201	132	130	169	4	4	14	58	47	62	14	6	18	299	150	1.53304e-06	0.000204639	0.943,0.942,0.858	0.675,0.797,0.633	0.213	136	72	134	53	183	80
97500	ENSG00000102904	TSNAXIP1	chr16	+	67824582	67824779	67821098	67821225	67825136	67825267	97500	13	11	17	0	0	0	4	2	15	2	0	4	300	150	0.000388439	0.0168208	1.0,1.0,1.0	0.5,1.0,0.652	0.283	13	6	11	2	17	19
97623	ENSG00000170324	FRMPD2	chr10	-	48244783	48244849	48242045	48242352	48249020	48249178	97623	13	14	11	2	4	4	3	3	7	3	6	10	215	150	0.000246177	0.0120679	0.819,0.709,0.657	0.411,0.259,0.328	0.396	15	6	18	9	15	17
97702	ENSG00000100697	DICER1	chr14	-	95134360	95134503	95133314	95133503	95157390	95157486	97702	26	17	25	1	0	0	16	12	19	2	6	11	292	150	1.89312e-08	4.58409e-06	0.93,1.0,1.0	0.804,0.507,0.47	0.383	27	18	17	18	25	30
97707	ENSG00000100697	DICER1	chr14	-	95141682	95141748	95133314	95133503	95157390	95157486	97707	5	2	3	1	0	0	9	10	11	2	6	11	215	150	1.77669e-05	0.00151711	0.777,1.0,1.0	0.758,0.538,0.411	0.357	6	11	2	16	3	22
98311	ENSG00000185596	WASH3P	chr15	+	101965952	101966223	101961603	101961641	101972595	101972694	98311	13	13	20	0	0	0	17	15	5	0	4	2	300	150	0.00106731	0.0356057	1.0,1.0,1.0	1.0,0.652,0.556	0.264	13	17	13	19	20	7
98414	ENSG00000168477	TNXB	chr6	-	32052669	32052993	32049997	32050321	32053387	32053705	98414	4	12	2	2	0	0	0	2	4	5	0	4	300	150	0.000288331	0.0134942	0.5,1.0,1.0	0.0,1.0,0.333	0.389	6	5	12	2	2	8
99140	ENSG00000186951	PPARA	chr22	+	46176752	46176836	46151883	46151970	46198341	46198410	99140	31	36	28	2	2	6	15	20	31	5	9	11	233	150	0.000856979	0.0302928	0.909,0.921,0.75	0.659,0.589,0.645	0.229	33	20	38	29	34	42
99142	ENSG00000186951	PPARA	chr22	+	46188722	46188822	46151887	46151970	46198344	46198410	99142	31	43	33	11	7	1	19	14	22	12	11	11	249	150	0.000857654	0.030306	0.629,0.787,0.952	0.488,0.434,0.546	0.3	42	31	50	25	34	33
99299	ENSG00000152061	RABGAP1L	chr1	+	174877391	174877605	174874457	174874506	174957456	174957549	99299	80	82	97	31	31	0	102	77	137	52	56	103	300	150	0.000915348	0.0318728	0.563,0.569,1.0	0.495,0.407,0.399	0.277	111	154	113	133	97	240
99655	ENSG00000089775	ZBTB25	chr14	-	64487113	64487196	64449329	64449638	64490360	64490533	99655	14	20	11	7	10	7	4	2	5	10	5	9	232	150	0.000379224	0.0165531	0.564,0.564,0.504	0.205,0.205,0.264	0.319	21	14	30	7	18	14
99967	ENSG00000120805	ARL1	chr12	-	101403141	101403255	101401061	101401173	101405843	101405981	99967	5	3	4	0	2	0	0	1	3	4	1	4	263	150	6.35288e-06	0.000659419	1.0,0.461,1.0	0.0,0.363,0.3	0.599	5	4	5	2	4	7
100864	ENSG00000100100	PIK3IP1	chr22	-	31289314	31289393	31281592	31283288	31289498	31289699	100864	73	87	123	0	7	22	54	59	66	22	11	22	228	150	0.000102848	0.00610165	1.0,0.891,0.786	0.618,0.779,0.664	0.205	73	76	94	70	145	88
100915	ENSG00000160766	GBAP1	chr1	-	155218387	155218479	155217239	155218049	155218847	155218943	100915	36	33	41	10	9	10	25	14	20	13	22	27	241	150	4.53568e-05	0.00325013	0.691,0.695,0.718	0.545,0.284,0.316	0.32	46	38	42	36	51	47
101939	ENSG00000010270	STARD3NL	chr7	+	38179089	38179145	38178350	38178420	38214356	38214434	101939	39	42	45	3	8	4	30	18	32	24	12	17	205	150	3.1954e-08	7.10693e-06	0.905,0.793,0.892	0.478,0.523,0.579	0.337	42	54	50	30	49	49
103091	ENSG00000278903	CU633906.2	chr21	+	6320871	6320974	6318439	6318604	6322599	6322697	103091	4	5	2	0	0	0	8	4	6	4	3	0	252	150	2.43606e-05	0.00195212	1.0,1.0,1.0	0.543,0.442,1.0	0.338	4	12	5	7	2	6
103514	ENSG00000126001	CEP250	chr20	+	35458303	35458374	35455163	35455242	35459982	35460105	103514	34	42	40	2	2	0	30	37	22	7	8	7	220	150	2.67373e-06	0.000328879	0.921,0.935,1.0	0.745,0.759,0.682	0.223	36	37	44	45	40	29
103691	ENSG00000073849	ST6GAL1	chr3	+	186996547	186996673	186963784	186963926	187038741	187038873	103691	654	567	614	398	444	214	115	242	336	651	457	657	275	150	1.9984e-15	1.56512e-12	0.473,0.411,0.61	0.088,0.224,0.218	0.321	1052	766	1011	699	828	993
104044	ENSG00000189223	PAX8-AS1	chr2	+	113236512	113236622	113235529	113235570	113238089	113238212	104044	19	25	25	20	3	19	0	0	1	4	4	5	259	150	3.39006e-08	7.46917e-06	0.355,0.828,0.432	0.0,0.0,0.104	0.504	39	4	28	4	44	6
104332	ENSG00000182326	C1S	chr12	+	6997224	6997342	6988258	6988369	7042960	7043128	104332	14	19	15	0	0	0	11	11	15	5	2	2	267	150	8.58152e-07	0.00012396	1.0,1.0,1.0	0.553,0.755,0.808	0.295	14	16	19	13	15	17
105088	ENSG00000172738	TMEM217	chr6	-	37215197	37215282	37212180	37212996	37218425	37219041	105088	1	4	2	3	1	7	0	0	2	8	6	7	234	150	0.00113783	0.0372398	0.176,0.719,0.155	0.0,0.0,0.155	0.298	4	8	5	6	9	9
105578	ENSG00000026508	CD44	chr11	+	35196745	35196874	35189834	35189972	35198120	35198246	105578	6	5	3	1	0	0	4	2	5	0	1	7	278	150	0.000207543	0.0105205	0.764,1.0,1.0	1.0,0.519,0.278	0.322	7	4	5	3	3	12
105627	ENSG00000026508	CD44	chr11	+	35206111	35206243	35204511	35204640	35214851	35214914	105627	116	128	131	41	22	45	51	44	70	39	31	43	281	150	3.74079e-05	0.00278816	0.602,0.756,0.608	0.411,0.431,0.465	0.22	157	90	150	75	176	113
105633	ENSG00000026508	CD44	chr11	+	35206114	35206243	35204511	35204640	35211245	35211253	105633	20	16	21	0	2	0	12	13	6	2	2	4	278	150	0.000131973	0.0073746	1.0,0.812,1.0	0.764,0.778,0.447	0.274	20	14	18	15	21	10
105643	ENSG00000026508	CD44	chr11	+	35208104	35208206	35204511	35204640	35211245	35211253	105643	23	14	8	0	2	0	12	2	1	2	2	4	251	150	1.58296e-05	0.0013799	1.0,0.807,1.0	0.782,0.374,0.13	0.507	23	14	16	4	8	5
105885	ENSG00000169230	PRELID1	chr5	+	177304292	177304430	177303854	177304077	177304575	177304850	105885	14	20	17	18	6	20	4	7	9	35	18	23	287	150	0.000255417	0.0124009	0.289,0.635,0.308	0.056,0.169,0.17	0.279	32	39	26	25	37	32
105898	ENSG00000276291	FRG1HP	chr9	+	41008880	41009006	40994632	40994699	41011616	41011730	105898	220	155	209	0	0	0	97	80	122	22	17	25	275	150	0	0	1.0,1.0,1.0	0.706,0.72,0.727	0.282	220	119	155	97	209	147
106025	ENSG00000255139	AP000442.2	chr11	+	59635419	59635532	59620414	59620472	59639319	59639542	106025	5	2	4	0	0	0	4	6	3	2	3	2	262	150	1.16482e-06	0.000162408	1.0,1.0,1.0	0.534,0.534,0.462	0.49	5	6	2	9	4	5
106027	ENSG00000174123	TLR10	chr4	-	38775774	38775963	38772238	38775652	38782920	38782990	106027	199	185	194	81	46	163	149	92	174	165	136	179	300	150	0.000115805	0.00667577	0.551,0.668,0.373	0.311,0.253,0.327	0.234	280	314	231	228	357	353
107680	ENSG00000263809	AC135178.2	chr17	-	8375899	8376104	8368637	8370386	8379795	8379936	107680	30	27	34	0	0	0	9	9	19	4	0	60	300	150	2.66274e-07	4.59439e-05	1.0,1.0,1.0	0.529,1.0,0.137	0.445	30	13	27	9	34	79
108651	ENSG00000260643	AC092718.3	chr16	-	81057904	81058064	81053664	81054094	81096130	81096296	108651	10	9	8	0	0	2	7	5	2	5	4	0	300	150	0.000448576	0.0187136	1.0,1.0,0.667	0.412,0.385,1.0	0.29	10	12	9	9	10	2
108653	ENSG00000260643	AC092718.3	chr16	-	81063745	81063993	81060408	81062138	81096130	81096284	108653	4	15	9	0	0	0	13	9	10	2	8	1	300	150	3.91238e-07	6.39818e-05	1.0,1.0,1.0	0.765,0.36,0.833	0.347	4	15	15	17	9	11
109141	ENSG00000187630	DHRS4L2	chr14	+	24001032	24001084	23995031	23995133	24001383	24001482	109141	42	48	57	3	1	6	167	75	107	47	22	32	201	150	3.50292e-07	5.79473e-05	0.913,0.973,0.876	0.726,0.718,0.714	0.201	45	214	49	97	63	139
110099	ENSG00000183137	CEP57L1	chr6	+	109100191	109100286	109095152	109095575	109140424	109140465	110099	6	14	6	0	2	0	8	8	8	2	4	2	244	150	0.000593416	0.0228979	1.0,0.811,1.0	0.711,0.551,0.711	0.279	6	10	16	12	6	10
110329	ENSG00000173915	ATP5MD	chr10	-	103394198	103394394	103392370	103392466	103395745	103396032	110329	262	244	264	226	394	404	58	25	47	497	293	451	300	150	0	0	0.367,0.236,0.246	0.055,0.041,0.05	0.234	488	555	638	318	668	498
110611	ENSG00000152464	RPP38	chr10	+	15102217	15102336	15097179	15097409	15103304	15103713	110611	138	153	167	3	1	12	195	102	164	45	68	79	268	150	0	0	0.963,0.988,0.886	0.708,0.456,0.537	0.379	141	240	154	170	179	243
110972	ENSG00000181135	ZNF707	chr8	+	143684755	143685067	143684486	143684542	143691072	143691199	110972	3	6	6	0	0	0	8	13	5	3	7	1	300	150	7.6762e-09	2.01975e-06	1.0,1.0,1.0	0.571,0.481,0.714	0.411	3	11	6	20	6	6
111043	ENSG00000166128	RAB8B	chr15	+	63223847	63223979	63223041	63223073	63244755	63244816	111043	40	24	46	4	45	0	11	5	20	43	26	22	281	150	7.82843e-05	0.00499863	0.842,0.222,1.0	0.12,0.093,0.327	0.508	44	54	69	31	46	42
111213	ENSG00000227963	RBM15-AS1	chr1	-	110318764	110318882	110292386	110292507	110338996	110339171	111213	10	28	25	0	0	0	25	16	13	3	4	4	267	150	2.81274e-07	4.81181e-05	1.0,1.0,1.0	0.824,0.692,0.646	0.279	10	28	28	20	25	17
111246	ENSG00000061656	SPAG4	chr20	+	35618611	35618720	35618449	35618475	35619194	35619310	111246	30	26	31	0	0	2	6	5	10	2	2	3	258	150	3.7208e-05	0.00277532	1.0,1.0,0.9	0.636,0.592,0.66	0.337	30	8	26	7	33	13
111247	ENSG00000061656	SPAG4	chr20	+	35618922	35618998	35618449	35618475	35619194	35619310	111247	22	24	38	0	0	2	7	8	17	2	2	3	225	150	0.000317374	0.014508	1.0,1.0,0.927	0.7,0.727,0.791	0.236	22	9	24	10	40	20
111264	ENSG00000015285	WAS	chrX	+	48683267	48683363	48676595	48676748	48683819	48683985	111264	35	67	72	0	7	14	0	2	1	2	3	19	245	150	2.07612e-14	1.40626e-11	1.0,0.854,0.759	0.0,0.29,0.031	0.764	35	2	74	5	86	20
111378	ENSG00000206149	HERC2P9	chr15	+	28655494	28655691	28655272	28655420	28655795	28656026	111378	67	58	88	21	33	43	37	29	50	53	33	43	300	150	4.7334e-05	0.00335641	0.615,0.468,0.506	0.259,0.305,0.368	0.219	88	90	91	62	131	93
111524	ENSG00000176261	ZBTB8OS	chr1	-	32634767	32634792	32620819	32621948	32650428	32650550	111524	10	11	6	0	0	2	10	14	10	4	8	4	174	150	4.26193e-05	0.00308039	1.0,1.0,0.721	0.683,0.601,0.683	0.251	10	14	11	22	8	14
111587	ENSG00000197548	ATG7	chr3	+	11288645	11288740	11281036	11281102	11298685	11298855	111587	4	4	2	12	16	2	2	0	0	23	16	3	244	150	0.000261387	0.0126221	0.17,0.133,0.381	0.051,0.0,0.0	0.211	16	25	20	16	4	3
111739	ENSG00000170581	STAT2	chr12	-	56348923	56349059	56348528	56348623	56349425	56349509	111739	20	12	23	1	5	2	17	7	13	13	7	10	285	150	0.000212899	0.0107411	0.913,0.558,0.858	0.408,0.345,0.406	0.39	21	30	17	14	25	23
112758	ENSG00000122085	MTERF4	chr2	-	241095129	241096438	241094276	241094429	241102252	241102295	112758	6	5	4	0	0	0	1	2	0	4	1	5	300	150	7.88258e-15	5.60435e-12	1.0,1.0,1.0	0.111,0.5,0.0	0.796	6	5	5	3	4	5
113365	ENSG00000170482	SLC23A1	chr5	-	139379955	139380076	139379677	139379834	139380797	139380886	113365	8	12	14	0	0	0	4	13	8	2	0	4	270	150	0.000465954	0.0192226	1.0,1.0,1.0	0.526,1.0,0.526	0.316	8	6	12	13	14	12
113392	ENSG00000109684	CLNK	chr4	-	10525840	10525922	10520790	10520831	10532255	10532283	113392	62	103	83	5	0	0	10	12	7	5	3	0	231	150	0.000608153	0.0233676	0.89,1.0,1.0	0.565,0.722,1.0	0.201	67	15	103	15	83	7
113430	ENSG00000006282	SPATA20	chr17	+	50547719	50547954	50547128	50547285	50548282	50548453	113430	22	17	24	18	14	10	23	16	9	53	54	69	300	150	1.26064e-08	3.19133e-06	0.379,0.378,0.545	0.178,0.129,0.061	0.311	40	76	31	70	34	78
114808	ENSG00000182552	RWDD4	chr4	-	183646350	183646353	183639634	183641468	183646487	183646537	114808	2	6	0	0	2	2	0	0	2	4	2	5	152	150	0.00056247	0.0220002	1.0,0.748,0.0	0.0,0.0,0.283	0.488	2	4	8	2	2	7
115325	ENSG00000144218	AFF3	chr2	-	100112385	100112524	100105503	100105583	100142483	100142595	115325	35	28	47	10	12	4	72	86	78	50	75	53	288	150	0.000373536	0.0163735	0.646,0.549,0.86	0.429,0.374,0.434	0.273	45	122	40	161	51	131
115982	ENSG00000172830	SSH3	chr11	+	67307548	67307737	67307370	67307436	67307845	67307906	115982	17	5	16	0	0	0	6	2	1	3	2	1	300	150	8.55553e-07	0.000123763	1.0,1.0,1.0	0.5,0.333,0.333	0.611	17	9	5	4	16	2
115984	ENSG00000160221	GATD3A	chr21	+	44134101	44134154	44133604	44133838	44136059	44136173	115984	23	24	33	0	1	9	22	20	10	14	8	11	202	150	6.08363e-05	0.00408487	1.0,0.947,0.731	0.539,0.65,0.403	0.362	23	36	25	28	42	21
116399	ENSG00000272138	LINC01607	chr8	+	79800560	79800690	79783728	79783766	79802486	79802799	116399	3	2	4	0	0	1	8	3	0	0	4	3	279	150	5.75635e-05	0.0039176	1.0,1.0,0.683	1.0,0.287,0.0	0.465	3	8	2	7	5	3
116573	ENSG00000101608	MYL12A	chr18	+	3249360	3249443	3247812	3247909	3249561	3249723	116573	68	72	86	20	26	24	54	40	62	35	41	42	232	150	1.63124e-05	0.00141095	0.687,0.642,0.699	0.499,0.387,0.488	0.218	88	89	98	81	110	104
116672	ENSG00000099290	WASHC2A	chr10	+	50099977	50100064	50097674	50097802	50104041	50104143	116672	133	192	156	53	49	54	83	62	95	54	47	89	236	150	1.29411e-07	2.47616e-05	0.615,0.714,0.647	0.494,0.456,0.404	0.207	186	137	241	109	210	184
117813	ENSG00000228315	GUSBP11	chr22	-	23700725	23700845	23694118	23695517	23705428	23705541	117813	20	31	14	18	17	17	16	5	8	25	15	24	269	150	0.00162436	0.0485218	0.383,0.504,0.315	0.263,0.157,0.157	0.208	38	41	48	20	31	32
117892	ENSG00000034152	MAP2K3	chr17	+	21296085	21296210	21295674	21295769	21298412	21298444	117892	2	31	7	0	0	0	13	28	15	27	0	2	274	150	3.77367e-05	0.00280017	1.0,1.0,1.0	0.209,1.0,0.804	0.329	2	40	31	28	7	17
118136	ENSG00000239556	AC004951.2	chr7	-	43986191	43986312	43984994	43985103	43986600	43986677	118136	34	57	74	1	2	2	50	53	68	14	9	14	270	150	1.04715e-07	2.05833e-05	0.95,0.941,0.954	0.665,0.766,0.73	0.228	35	64	59	62	76	82
119298	ENSG00000122678	POLM	chr7	-	44078321	44078438	44076508	44076629	44078553	44078811	119298	19	11	12	1	0	0	11	18	17	4	3	1	266	150	0.000113246	0.0065723	0.915,1.0,1.0	0.608,0.772,0.906	0.21	20	15	11	21	12	18
119451	ENSG00000285756	BX890604.2	chrX	-	3818656	3818703	3818441	3818500	3828505	3828859	119451	35	35	38	0	1	0	40	22	23	15	0	23	196	150	1.72192e-07	3.2145e-05	1.0,0.964,1.0	0.671,1.0,0.434	0.286	35	55	36	22	38	46
119547	ENSG00000115459	ELMOD3	chr2	+	85355554	85355598	85355075	85355170	85356966	85357252	119547	39	48	40	17	6	0	46	25	44	17	31	35	193	150	0.000195862	0.0100691	0.641,0.861,1.0	0.678,0.385,0.494	0.315	56	63	54	56	40	79
119550	ENSG00000115459	ELMOD3	chr2	+	85355554	85355716	85355075	85355170	85356966	85357252	119550	21	34	27	17	6	0	26	16	30	17	31	35	300	150	0.00139327	0.0433229	0.382,0.739,1.0	0.433,0.205,0.3	0.394	38	43	40	47	27	65
120138	ENSG00000140525	FANCI	chr15	+	89245194	89245311	89243989	89244044	89247628	89247731	120138	20	55	23	0	0	2	27	31	20	19	44	10	266	150	7.77156e-16	6.43871e-13	1.0,1.0,0.866	0.445,0.284,0.53	0.536	20	46	55	75	25	30
120145	ENSG00000140525	FANCI	chr15	+	89245755	89245839	89243989	89244044	89247628	89247731	120145	20	36	13	0	0	2	21	36	18	19	44	10	233	150	1.68643e-13	9.60574e-11	1.0,1.0,0.807	0.416,0.345,0.537	0.503	20	40	36	80	15	28
176	ENSG00000253882	AC099548.2	chr7	-	143833246	143833883	143811968	143813779	143836639	143836708	176	17	110	42	20	48	4	26	11	19	0	0	0	300	150	2.58221e-09	7.63603e-07	0.298,0.534,0.84	1.0,1.0,1.0	-0.443	37	26	158	11	46	19
208	ENSG00000125952	MAX	chr14	-	65077562	65077643	65077384	65077428	65077912	65078036	208	0	0	0	20	8	27	13	17	9	3	0	2	230	150	0	0	0.0,0.0,0.0	0.739,1.0,0.746	-0.828	20	16	8	17	27	11
232	ENSG00000075234	TTC38	chr22	+	46292202	46292328	46289401	46289561	46292790	46292933	232	39	40	67	9	8	6	87	50	100	0	0	0	275	150	1.59438e-11	6.65973e-09	0.703,0.732,0.859	1.0,1.0,1.0	-0.235	48	87	48	50	73	100
369	ENSG00000234663	LINC01934	chr2	+	181354207	181354343	181226470	181226539	181362686	181362902	369	28	29	30	9	0	12	2	3	7	0	0	0	285	150	3.23853e-06	0.000383754	0.621,1.0,0.568	1.0,1.0,1.0	-0.27	37	2	29	3	42	7
1128	ENSG00000146828	SLC12A9	chr7	+	100854155	100854378	100852718	100852835	100859884	100860042	1128	9	10	22	4	2	0	6	20	9	0	0	0	300	150	0.00100993	0.0343314	0.529,0.714,1.0	1.0,1.0,1.0	-0.252	13	6	12	20	22	9
1134	ENSG00000146828	SLC12A9	chr7	+	100858834	100858942	100852718	100852835	100859884	100860042	1134	11	5	23	4	2	0	11	7	17	0	0	0	257	150	0.00142399	0.0439372	0.616,0.593,1.0	1.0,1.0,1.0	-0.264	15	11	7	7	23	17
1262	ENSG00000133256	PDE6B	chr4	+	667855	667941	666530	666614	670045	670314	1262	22	22	19	4	7	5	12	3	3	0	0	0	235	150	6.91889e-07	0.000103215	0.778,0.667,0.708	1.0,1.0,1.0	-0.282	26	12	29	3	24	3
1263	ENSG00000133256	PDE6B	chr4	+	667855	668006	666530	666614	670045	670233	1263	33	42	45	4	7	5	13	10	5	0	0	0	300	150	4.56118e-06	0.000506366	0.805,0.75,0.818	1.0,1.0,1.0	-0.209	37	13	49	10	50	5
1689	ENSG00000142227	EMP3	chr19	+	48325990	48326053	48321508	48321977	48326829	48326922	1689	14	13	28	4	6	1	10	11	20	0	0	0	212	150	2.95884e-06	0.000356879	0.712,0.605,0.952	1.0,1.0,1.0	-0.244	18	10	19	11	29	20
2888	ENSG00000154582	ELOC	chr8	-	73964486	73964625	73955910	73956054	73972041	73972186	2888	7	2	7	4	2	4	6	7	4	0	0	0	288	150	1.54802e-09	4.74576e-07	0.477,0.342,0.477	1.0,1.0,1.0	-0.568	11	6	4	7	11	4
2890	ENSG00000154582	ELOC	chr8	-	73964486	73964625	73955910	73956054	73972244	73972287	2890	20	7	14	14	9	7	23	17	16	2	2	5	288	150	0.000474809	0.0194866	0.427,0.288,0.51	0.857,0.816,0.625	-0.358	34	25	16	19	21	21
3026	ENSG00000233024	NPIPA9	chr16	-	18372722	18372854	18368257	18368386	18374831	18375069	3026	2	2	3	7	9	8	4	20	4	3	7	5	281	150	0.000463697	0.0191689	0.132,0.106,0.167	0.416,0.604,0.299	-0.305	9	7	11	27	11	9
3042	ENSG00000205133	TRIQK	chr8	-	92921502	92921660	92916928	92917007	92966006	92966111	3042	19	12	19	12	7	10	2	6	4	0	0	2	300	150	0.000725397	0.0267647	0.442,0.462,0.487	1.0,1.0,0.5	-0.37	31	2	19	6	29	6
3606	ENSG00000170638	TRABD	chr22	+	50197448	50197588	50194899	50195040	50198074	50198186	3606	17	25	9	8	11	8	30	32	31	2	3	2	289	150	1.41978e-06	0.000192078	0.524,0.541,0.369	0.886,0.847,0.889	-0.396	25	32	36	35	17	33
3747	ENSG00000204650	LINC02210	chr17	+	45640388	45640455	45639436	45639520	45645900	45646232	3747	0	0	0	10	5	7	3	2	2	4	4	4	216	150	4.66859e-05	0.00332398	0.0,0.0,0.0	0.342,0.258,0.258	-0.286	10	7	5	6	7	6
4144	ENSG00000184574	LPAR5	chr12	-	6631584	6631671	6620432	6621464	6635906	6635960	4144	30	28	36	33	65	48	128	141	135	52	56	52	236	150	3.0859e-11	1.23249e-08	0.366,0.215,0.323	0.61,0.615,0.623	-0.315	63	180	93	197	84	187
4532	ENSG00000115257	PCSK4	chr19	-	1483837	1483941	1483649	1483767	1484026	1484127	4532	10	16	22	6	0	2	33	7	9	0	0	0	253	150	0.000134385	0.00748437	0.497,1.0,0.867	1.0,1.0,1.0	-0.212	16	33	16	7	24	9
4586	ENSG00000161958	FGF11	chr17	+	7442593	7442792	7441775	7441879	7443075	7443331	4586	117	131	154	27	29	35	40	16	23	0	0	0	300	150	1.80171e-11	7.46356e-09	0.684,0.693,0.688	1.0,1.0,1.0	-0.312	144	40	160	16	189	23
4835	ENSG00000138386	NAB1	chr2	+	190655976	190656153	190649845	190649982	190659157	190659362	4835	71	70	105	41	51	60	70	45	72	27	0	16	300	150	0.000798698	0.0286689	0.464,0.407,0.467	0.565,1.0,0.692	-0.306	112	97	121	45	165	88
4920	ENSG00000086288	NME8	chr7	+	37863395	37863462	37857273	37857345	37884302	37884447	4920	3	6	12	2	7	10	2	2	3	1	0	0	216	150	1.79487e-05	0.00152744	0.51,0.373,0.455	0.581,1.0,1.0	-0.414	5	3	13	2	22	3
4929	ENSG00000086288	NME8	chr7	+	37876831	37877007	37857273	37857345	37884302	37884447	4929	37	22	21	2	7	10	7	5	3	1	0	0	300	150	9.14816e-05	0.00559287	0.902,0.611,0.512	0.778,1.0,1.0	-0.251	39	8	29	5	31	3
5313	ENSG00000166435	XRRA1	chr11	-	74851988	74852082	74850869	74851203	74906238	74906352	5313	63	95	82	22	14	12	35	30	33	0	2	0	243	150	6.94279e-08	1.41752e-05	0.639,0.807,0.808	1.0,0.903,1.0	-0.216	85	35	109	32	94	33
5329	ENSG00000166435	XRRA1	chr11	-	74927390	74927488	74921213	74921347	74936883	74937068	5329	47	43	42	6	7	8	8	14	7	0	0	0	247	150	2.36101e-06	0.000296972	0.826,0.789,0.761	1.0,1.0,1.0	-0.208	53	8	50	14	50	7
5333	ENSG00000166435	XRRA1	chr11	-	74930299	74930372	74921213	74921347	74936883	74937068	5333	22	19	23	6	7	8	4	7	4	0	0	0	222	150	4.01473e-07	6.51244e-05	0.712,0.647,0.66	1.0,1.0,1.0	-0.327	28	4	26	7	31	4
6477	ENSG00000106603	COA1	chr7	-	43656032	43656153	43648599	43648652	43665657	43665722	6477	37	33	38	53	58	61	94	75	121	12	12	12	270	150	0	0	0.279,0.24,0.257	0.813,0.776,0.849	-0.554	90	106	91	87	99	133
6480	ENSG00000106603	COA1	chr7	-	43656032	43656153	43650611	43650712	43665657	43665722	6480	57	75	51	50	42	30	105	90	103	4	2	6	270	150	0	0	0.388,0.498,0.486	0.936,0.962,0.905	-0.477	107	109	117	92	81	109
6481	ENSG00000106603	COA1	chr7	-	43656032	43656153	43650611	43650712	43729428	43729505	6481	94	141	83	34	91	95	172	155	172	42	33	22	270	150	3.98241e-06	0.000454185	0.606,0.463,0.327	0.695,0.723,0.813	-0.278	128	214	232	188	178	194
6482	ENSG00000106603	COA1	chr7	-	43657215	43657269	43648599	43648652	43665657	43665722	6482	37	37	39	53	58	61	21	36	47	12	12	12	203	150	2.22053e-08	5.2625e-06	0.34,0.32,0.321	0.564,0.689,0.743	-0.338	90	33	95	48	100	59
6484	ENSG00000106603	COA1	chr7	-	43657215	43657269	43650611	43650712	43665657	43665722	6484	40	38	34	50	42	30	21	36	45	4	2	6	203	150	8.34888e-14	4.92328e-11	0.372,0.401,0.456	0.795,0.93,0.847	-0.448	90	25	80	38	64	51
6727	ENSG00000141380	SS18	chr18	-	26080304	26080423	26078075	26078160	26082362	26082528	6727	6	16	13	26	29	39	19	11	14	5	2	6	268	150	3.32498e-09	9.5235e-07	0.114,0.236,0.157	0.68,0.755,0.566	-0.498	32	24	45	13	52	20
6997	ENSG00000156411	ATP5MPL	chr14	-	103914478	103914633	103913256	103913984	103921469	103921520	6997	3	7	13	28	17	25	18	19	25	6	21	6	300	150	1.24984e-05	0.00114633	0.051,0.171,0.206	0.6,0.311,0.676	-0.386	31	24	24	40	38	31
7092	ENSG00000065357	DGKA	chr12	+	55935304	55935404	55932063	55932255	55936422	55936567	7092	4	12	13	9	3	7	16	7	4	0	0	2	249	150	6.97878e-05	0.00455771	0.211,0.707,0.528	1.0,1.0,0.546	-0.367	13	16	15	7	20	6
7339	ENSG00000221887	HMSD	chr18	+	63953353	63953527	63949300	63949400	63954407	63954557	7339	448	478	508	415	444	430	779	707	880	0	0	0	300	150	0	0	0.351,0.35,0.371	1.0,1.0,1.0	-0.643	863	779	922	707	938	880
8510	ENSG00000116962	NID1	chr1	-	236013410	236013560	235993644	235993872	236024069	236024213	8510	9	18	10	0	11	3	19	15	9	0	1	0	299	150	2.19386e-05	0.00179535	1.0,0.451,0.626	1.0,0.883,1.0	-0.269	9	19	29	16	13	9
8665	ENSG00000183648	NDUFB1	chr14	-	92118848	92118966	92117497	92117642	92121195	92121404	8665	42	27	38	34	25	25	44	26	37	14	8	6	267	150	5.47364e-05	0.00377128	0.41,0.378,0.461	0.638,0.646,0.776	-0.27	76	58	52	34	63	43
8920	ENSG00000131089	ARHGEF9	chrX	-	63754303	63754676	63724531	63724711	63754920	63755123	8920	55	60	49	20	22	22	53	50	42	12	3	5	300	150	0.000367431	0.0162265	0.579,0.577,0.527	0.688,0.893,0.808	-0.235	75	65	82	53	71	47
9369	ENSG00000105193	RPS16	chr19	-	39433517	39433569	39433259	39433418	39435606	39435705	9369	2	3	3	8	11	10	6	11	4	4	3	4	201	150	0.00021047	0.01064	0.157,0.169,0.183	0.528,0.732,0.427	-0.393	10	10	14	14	13	8
9383	ENSG00000115641	FHL2	chr2	-	105396646	105396697	105386360	105386540	105398841	105399224	9383	17	20	22	21	15	16	6	2	5	0	0	0	200	150	5.29664e-09	1.45473e-06	0.378,0.5,0.508	1.0,1.0,1.0	-0.538	38	6	35	2	38	5
9542	ENSG00000106133	NSUN5P2	chr7	-	72953325	72953430	72950057	72950196	72954358	72954479	9542	14	9	27	43	24	14	28	34	27	12	10	12	254	150	0.000401145	0.0172297	0.161,0.181,0.532	0.579,0.668,0.571	-0.315	57	40	33	44	41	39
9988	ENSG00000256053	APOPT1	chr14	+	103579370	103579491	103574106	103574170	103581568	103581656	9988	10	6	11	4	3	6	2	8	11	0	1	0	270	150	2.06488e-06	0.000262357	0.581,0.526,0.505	1.0,0.816,1.0	-0.401	14	2	9	9	17	11
10114	ENSG00000079263	SP140	chr2	+	230243730	230243811	230241403	230241487	230244987	230245071	10114	521	595	592	304	320	299	411	363	442	5	0	2	230	150	0	0	0.528,0.548,0.564	0.982,1.0,0.993	-0.445	825	416	915	363	891	444
10265	ENSG00000157020	SEC13	chr3	-	10319138	10319172	10318049	10318094	10320870	10321041	10265	24	26	33	4	10	9	31	25	24	0	2	0	183	150	1.8608e-07	3.43538e-05	0.831,0.681,0.75	1.0,0.911,1.0	-0.216	28	31	36	27	42	24
10326	ENSG00000244479	OR2A1-AS1	chr7	-	144350717	144350824	144343170	144343298	144355337	144355401	10326	1	2	2	8	5	13	6	41	6	7	15	12	256	150	0.000175805	0.00925945	0.068,0.19,0.083	0.334,0.616,0.227	-0.279	9	13	7	56	15	18
10468	ENSG00000143119	CD53	chr1	+	110894326	110894401	110891391	110891471	110899123	110899922	10468	4	4	2	8	11	6	8	14	19	5	10	2	224	150	0.000267602	0.0128346	0.251,0.196,0.182	0.517,0.484,0.864	-0.412	12	13	15	24	8	21
11501	ENSG00000238005	AL391832.2	chr1	-	234961416	234961566	234959662	234959916	234963766	234963999	11501	12	14	21	2	5	2	18	9	15	0	0	0	299	150	1.82147e-06	0.000235916	0.751,0.584,0.84	1.0,1.0,1.0	-0.275	14	18	19	9	23	15
11727	ENSG00000104490	NCALD	chr8	-	101887140	101887227	101719251	101719648	101915808	101915858	11727	0	0	2	63	42	39	337	239	323	45	50	39	236	150	0	0	0.0,0.0,0.032	0.826,0.752,0.84	-0.795	63	382	42	289	41	362
11730	ENSG00000104490	NCALD	chr8	-	101887140	101887227	101779923	101779979	101915808	101915858	11730	0	0	0	12	23	26	207	130	183	25	15	28	236	150	0	0	0.0,0.0,0.0	0.84,0.846,0.806	-0.831	12	232	23	145	26	211
12199	ENSG00000076242	MLH1	chr3	+	36994829	36994953	36993572	36993663	36996623	36996709	12199	0	2	0	20	19	45	4	8	1	17	4	15	273	150	4.70482e-05	0.00334029	0.0,0.055,0.0	0.114,0.524,0.035	-0.206	20	21	21	12	45	16
12857	ENSG00000011275	RNF216	chr7	-	5777486	5777628	5766894	5766939	5781540	5781620	12857	0	0	0	2	13	3	5	2	4	2	3	1	291	150	2.93455e-08	6.65572e-06	0.0,0.0,0.0	0.563,0.256,0.673	-0.497	2	7	13	5	3	5
13021	ENSG00000149091	DGKZ	chr11	+	46366243	46366984	46345436	46345585	46367290	46367399	13021	101	110	106	255	288	199	164	116	149	77	50	121	300	150	1.11022e-16	1.00268e-13	0.165,0.16,0.21	0.516,0.537,0.381	-0.3	356	241	398	166	305	270
13660	ENSG00000204604	ZNF468	chr19	-	52853871	52854107	52849086	52849213	52854257	52854345	13660	29	26	30	41	111	94	46	35	68	22	15	36	300	150	3.05311e-14	1.94948e-11	0.261,0.105,0.138	0.511,0.538,0.486	-0.344	70	68	137	50	124	104
13661	ENSG00000204604	ZNF468	chr19	-	52853871	52854126	52849086	52849213	52854257	52854345	13661	38	34	36	41	111	94	66	54	90	22	15	36	300	150	6.21725e-15	4.48393e-12	0.317,0.133,0.161	0.6,0.643,0.556	-0.396	79	88	145	69	130	126
14033	ENSG00000183077	AFMID	chr17	+	78204827	78204900	78190969	78191060	78205945	78206050	14033	9	11	5	5	2	3	33	33	25	6	0	0	222	150	0.00168143	0.0497962	0.549,0.788,0.53	0.788,1.0,1.0	-0.307	14	39	13	33	8	25
14035	ENSG00000183077	AFMID	chr17	+	78204827	78204900	78202702	78202751	78205439	78205518	14035	15	14	8	10	14	4	48	31	39	8	4	2	222	150	1.46654e-06	0.000197339	0.503,0.403,0.575	0.802,0.84,0.929	-0.363	25	56	28	35	12	41
14037	ENSG00000183077	AFMID	chr17	+	78204827	78204900	78202702	78202751	78206910	78207405	14037	14	12	6	50	34	30	35	27	32	21	11	58	222	150	3.46465e-05	0.00261343	0.159,0.193,0.119	0.53,0.624,0.272	-0.318	64	56	46	38	36	90
14163	ENSG00000269001	AC092070.2	chr19	+	53200623	53200703	53197110	53197262	53204015	53204055	14163	35	16	14	19	7	9	74	63	54	0	0	0	229	150	0	0	0.547,0.6,0.505	1.0,1.0,1.0	-0.449	54	74	23	63	23	54
14164	ENSG00000269001	AC092070.2	chr19	+	53202551	53202702	53197110	53197262	53204015	53204142	14164	11	13	4	19	7	9	20	12	6	0	0	0	300	150	1.01918e-13	5.90585e-11	0.224,0.481,0.182	1.0,1.0,1.0	-0.704	30	20	20	12	13	6
15057	ENSG00000215790	SLC35E2A	chr1	-	1744250	1744668	1739235	1739704	1745723	1745919	15057	79	99	83	3	17	30	77	72	64	0	0	0	300	150	4.24988e-11	1.65775e-08	0.929,0.744,0.58	1.0,1.0,1.0	-0.249	82	77	116	72	113	64
15387	ENSG00000100600	LGMN	chr14	-	92741061	92741179	92732648	92732815	92741704	92741859	15387	0	5	5	12	6	12	14	31	25	3	6	0	267	150	6.61752e-10	2.15387e-07	0.0,0.319,0.19	0.724,0.744,1.0	-0.653	12	17	11	37	17	25
15920	ENSG00000241878	PISD	chr22	-	31628002	31628210	31625762	31626016	31630803	31630824	15920	16	24	21	51	83	24	22	22	32	10	29	16	300	150	0.000231021	0.0114537	0.136,0.126,0.304	0.524,0.275,0.5	-0.244	67	32	107	51	45	48
15924	ENSG00000241878	PISD	chr22	-	31628852	31628981	31625877	31626016	31629775	31629884	15924	18	10	16	4	4	2	13	14	21	0	0	0	278	150	3.39822e-07	5.64953e-05	0.708,0.574,0.812	1.0,1.0,1.0	-0.302	22	13	14	14	18	21
16109	ENSG00000165322	ARHGAP12	chr10	-	31839304	31839319	31831738	31831800	31839636	31839711	16109	27	2	18	27	29	33	34	41	53	24	13	23	164	150	9.06138e-05	0.00557292	0.478,0.059,0.333	0.564,0.743,0.678	-0.372	54	58	31	54	51	76
17143	ENSG00000197381	ADARB1	chr21	+	45120793	45120959	45118563	45118619	45128401	45128573	17143	7	11	4	0	5	3	3	12	14	0	0	2	300	150	0.000943856	0.0326838	1.0,0.524,0.4	1.0,1.0,0.778	-0.285	7	3	16	12	7	16
17666	ENSG00000135423	GLS2	chr12	-	56479051	56479147	56478182	56478262	56479779	56479901	17666	11	22	22	1	8	5	3	3	3	0	0	0	245	150	1.04498e-06	0.000148171	0.871,0.627,0.729	1.0,1.0,1.0	-0.258	12	3	30	3	27	3
18054	ENSG00000168826	ZBTB49	chr4	+	4313040	4313114	4302310	4303091	4320639	4320697	18054	10	12	19	4	6	0	18	16	16	0	0	0	223	150	4.54838e-06	0.000505506	0.627,0.574,1.0	1.0,1.0,1.0	-0.266	14	18	18	16	19	16
19607	ENSG00000099622	CIRBP	chr19	+	1264252	1264463	1261381	1261641	1270927	1271029	19607	8	16	6	0	2	5	10	4	3	0	0	0	300	150	0.000153151	0.00829565	1.0,0.8,0.375	1.0,1.0,1.0	-0.275	8	10	18	4	11	3
20169	ENSG00000137225	CAPN11	chr6	+	44173217	44173386	44172939	44173073	44176067	44176151	20169	10	15	19	2	2	2	4	3	4	0	0	0	300	150	0.00071448	0.026469	0.714,0.789,0.826	1.0,1.0,1.0	-0.224	12	4	17	3	21	4
20256	ENSG00000112290	WASF1	chr6	-	110160634	110160732	110127468	110127629	110179840	110180001	20256	5	5	16	7	0	5	4	17	20	0	1	0	247	150	2.1979e-05	0.00179719	0.303,1.0,0.66	1.0,0.912,1.0	-0.316	12	4	5	18	21	20
20263	ENSG00000112290	WASF1	chr6	-	110178597	110178742	110127468	110127629	110179840	110179923	20263	19	22	15	7	0	5	22	16	12	0	1	0	294	150	3.18373e-05	0.00244195	0.581,1.0,0.605	1.0,0.891,1.0	-0.235	26	22	22	17	20	12
20526	ENSG00000164181	ELOVL7	chr5	-	60802626	60802665	60799179	60799230	60844159	60844269	20526	12	10	3	13	25	10	2	4	2	0	0	0	188	150	3.70386e-09	1.05785e-06	0.424,0.242,0.193	1.0,1.0,1.0	-0.714	25	2	35	4	13	2
21178	ENSG00000104218	CSPP1	chr8	+	67091802	67091883	67086006	67086110	67095292	67095732	21178	10	12	14	4	4	2	16	16	9	0	0	2	230	150	0.000256305	0.0124366	0.62,0.662,0.82	1.0,1.0,0.746	-0.215	14	16	16	16	16	11
21618	ENSG00000196912	ANKRD36B	chr2	-	97507994	97508065	97507563	97507657	97509580	97509733	21618	34	10	8	0	6	2	5	2	15	0	0	0	220	150	0.000125198	0.00708685	1.0,0.532,0.732	1.0,1.0,1.0	-0.245	34	5	16	2	10	15
21662	ENSG00000271383	NBPF19	chr1	+	149480678	149480884	149480141	149480214	149482174	149482226	21662	17	12	8	0	4	3	16	15	14	0	2	0	300	150	0.00103722	0.0349921	1.0,0.6,0.571	1.0,0.789,1.0	-0.206	17	16	16	17	11	14
21769	ENSG00000243970	PPIEL	chr1	-	39523561	39523697	39522279	39522505	39529054	39529164	21769	13	8	6	22	15	17	17	4	12	4	1	11	285	150	0.00147227	0.0450527	0.237,0.219,0.157	0.691,0.678,0.365	-0.374	35	21	23	5	23	23
22116	ENSG00000114770	ABCC5	chr3	-	183985303	183985455	183983752	183984894	183987769	183987917	22116	6	3	4	1	2	4	8	7	16	0	0	0	300	150	2.82294e-07	4.82102e-05	0.75,0.429,0.333	1.0,1.0,1.0	-0.496	7	8	5	7	8	16
22129	ENSG00000237094	AL732372.2	chr1	-	504979	505103	501587	501620	514358	514423	22129	13	21	22	3	2	6	17	14	16	0	0	0	273	150	5.46228e-07	8.50284e-05	0.704,0.852,0.668	1.0,1.0,1.0	-0.259	16	17	23	14	28	16
22385	ENSG00000178852	EFCAB13	chr17	+	47361377	47361521	47345015	47345098	47370436	47370508	22385	7	5	10	25	20	11	16	19	22	11	7	3	293	150	1.31709e-05	0.00119166	0.125,0.113,0.318	0.427,0.582,0.79	-0.414	32	27	25	26	21	25
24245	ENSG00000283239	KBTBD11-OT1	chr8	+	1923467	1923595	1922963	1923079	1923773	1923874	24245	2	3	2	0	2	4	8	2	6	0	0	1	277	150	0.000151455	0.00822929	1.0,0.448,0.213	1.0,1.0,0.765	-0.368	2	8	5	2	6	7
25343	ENSG00000124785	NRN1	chr6	-	6003168	6003273	6002352	6002497	6003702	6004044	25343	14	1	2	10	8	9	33	21	17	8	5	4	254	150	7.88454e-06	0.000784915	0.453,0.069,0.116	0.709,0.713,0.715	-0.5	24	41	9	26	11	21
25344	ENSG00000124785	NRN1	chr6	-	6003168	6003273	6002352	6002497	6006694	6006967	25344	9	1	0	23	13	31	35	21	17	21	17	33	254	150	6.33376e-07	9.54807e-05	0.188,0.043,0.0	0.496,0.422,0.233	-0.307	32	56	14	38	31	50
25496	ENSG00000125726	CD70	chr19	-	6592415	6592575	6590102	6590136	6603940	6604103	25496	10	4	5	6	8	10	8	3	5	0	0	0	300	150	6.86798e-11	2.59812e-08	0.455,0.2,0.2	1.0,1.0,1.0	-0.715	16	8	12	3	15	5
26002	ENSG00000284770	TBCE	chr1	+	235427139	235427239	235414432	235414618	235434203	235434280	26002	7	0	0	0	2	2	6	4	3	0	0	0	249	150	2.37735e-05	0.00191683	1.0,0.0,0.0	1.0,1.0,1.0	-0.667	7	6	2	4	2	3
26180	ENSG00000230533	AL356234.2	chr6	+	137662155	137662288	137657997	137658035	137665645	137665739	26180	10	13	5	3	12	5	6	6	29	0	0	0	282	150	4.56855e-11	1.77515e-08	0.639,0.366,0.347	1.0,1.0,1.0	-0.549	13	6	25	6	10	29
26580	ENSG00000198001	IRAK4	chr12	+	43760924	43760972	43759035	43759200	43768102	43768272	26580	17	15	41	7	14	11	17	17	28	0	0	8	197	150	0.00157975	0.0475433	0.649,0.449,0.739	1.0,1.0,0.727	-0.297	24	17	29	17	52	36
27481	ENSG00000160188	RSPH1	chr21	-	42492965	42493079	42492757	42492863	42496132	42496246	27481	23	14	19	3	7	0	2	7	5	0	0	0	263	150	2.78955e-05	0.0021866	0.814,0.533,1.0	1.0,1.0,1.0	-0.218	26	2	21	7	19	5
27994	ENSG00000239827	SUGT1P3	chr13	-	40914014	40914105	40908158	40908212	40921473	40921531	27994	0	0	0	2	5	5	2	0	6	0	5	0	240	150	4.63632e-05	0.00330806	0.0,0.0,0.0	1.0,0.0,1.0	-0.667	2	2	5	5	5	6
28116	ENSG00000130023	ERMARD	chr6	+	169776333	169776411	169775939	169776065	169779181	169779295	28116	1	5	11	27	31	42	10	15	4	6	7	10	227	150	3.94067e-05	0.00289198	0.024,0.096,0.148	0.524,0.586,0.209	-0.35	28	16	36	22	53	14
28117	ENSG00000130023	ERMARD	chr6	+	169776333	169776411	169775939	169776065	169781329	169781584	28117	1	5	10	1	4	2	11	6	4	2	0	0	227	150	0.000362972	0.0160721	0.398,0.452,0.768	0.784,1.0,1.0	-0.389	2	13	9	6	12	4
28181	ENSG00000135541	AHI1	chr6	-	135302711	135302817	135300499	135300558	135318518	135318616	28181	6	29	32	26	28	38	21	17	11	7	2	7	255	150	0.000544283	0.0214732	0.12,0.379,0.331	0.638,0.833,0.48	-0.374	32	28	57	19	70	18
28221	ENSG00000105223	PLD3	chr19	+	40365552	40365585	40348583	40348724	40365717	40365930	28221	10	5	5	17	17	10	6	11	5	4	5	3	182	150	0.00119674	0.0385757	0.327,0.195,0.292	0.553,0.645,0.579	-0.321	27	10	22	16	15	8
28500	ENSG00000125746	EML2	chr19	-	45624718	45624818	45621206	45621332	45632860	45632971	28500	9	8	11	3	2	1	22	9	9	0	0	0	249	150	0.000381249	0.0166171	0.644,0.707,0.869	1.0,1.0,1.0	-0.26	12	22	10	9	12	9
28564	ENSG00000005243	COPZ2	chr17	-	48027675	48027789	48026166	48026475	48028471	48028510	28564	0	1	0	5	4	9	4	2	5	4	4	15	263	150	5.9671e-05	0.00402787	0.0,0.125,0.0	0.363,0.222,0.16	-0.207	5	8	5	6	9	20
28928	ENSG00000125846	ZNF133	chr20	+	18297984	18298062	18289898	18290074	18305007	18305178	28928	9	9	9	4	2	2	13	7	14	1	0	0	227	150	3.49655e-05	0.00263155	0.598,0.748,0.748	0.896,1.0,1.0	-0.267	13	14	11	7	11	14
29310	ENSG00000214770	AL161756.1	chr14	-	64337400	64337529	64335834	64336720	64337897	64338599	29310	0	5	0	8	10	14	10	10	3	14	2	1	278	150	3.78098e-05	0.00280352	0.0,0.212,0.0	0.278,0.73,0.618	-0.471	8	24	15	12	14	4
29581	ENSG00000196756	SNHG17	chr20	-	38422091	38422241	38421005	38421098	38426418	38426503	29581	143	150	166	187	207	231	169	165	199	62	70	77	299	150	0	0	0.277,0.267,0.265	0.578,0.542,0.565	-0.292	330	231	357	235	397	276
29949	ENSG00000137992	DBT	chr1	-	100210693	100210771	100206444	100206636	100214816	100214983	29949	108	133	130	63	62	70	214	123	208	0	1	0	227	150	0	0	0.531,0.586,0.551	1.0,0.988,1.0	-0.44	171	214	195	124	200	208
30381	ENSG00000156795	WDYHV1	chr8	+	123448046	123448224	123441305	123441349	123467078	123467230	30381	21	21	17	6	4	2	21	12	20	1	0	0	300	150	5.07359e-06	0.000548079	0.636,0.724,0.81	0.913,1.0,1.0	-0.248	27	22	25	12	19	20
30680	ENSG00000151687	ANKAR	chr2	+	189705022	189705224	189696149	189696369	189706937	189707146	30680	7	13	8	1	1	7	14	7	10	0	0	0	300	150	2.55771e-06	0.000317377	0.778,0.867,0.364	1.0,1.0,1.0	-0.33	8	14	14	7	15	10
31737	ENSG00000227039	ITGB2-AS1	chr21	+	44922912	44922983	44921072	44921327	44926867	44927004	31737	16	19	19	7	8	5	12	22	25	0	0	5	220	150	0.000754358	0.0274965	0.609,0.618,0.722	1.0,1.0,0.773	-0.275	23	12	27	22	24	30
32575	ENSG00000166171	DPCD	chr10	+	101608866	101609044	101601202	101601336	101609366	101609661	32575	6	6	4	24	9	6	6	3	6	1	2	2	300	150	0.00103214	0.034862	0.111,0.25,0.25	0.75,0.429,0.6	-0.389	30	7	15	5	10	8
[truncated: 287 more rows]

## Sheet: T21vsD21 CA+IFN
ID...1	GeneID	geneSymbol	chr	strand	exonStart_0base	exonEnd	upstreamES	upstreamEE	downstreamES	downstreamEE	ID...12	IJC_S1R1	IJC_S1R2	IJC_S1R3	SJC_S1R1	SJC_S1R2	SJC_S1R3	IJC_S2R1	IJC_S2R2	IJC_S2R3	SJC_S2R1	SJC_S2R2	SJC_S2R3	IncFormLen	SkipFormLen	PValue	FDR	IncLevel1	IncLevel2	IncLevelDifference	S1R1counts	S2R1counts	S1R2counts	S2R2counts	S1R3counts	S2R3counts
[truncated: 739 more rows]

[truncated: 8 more sheets: D21 IFNvsCtrl, T21 IFNvsCtrl, D21 CAvsCtrl, T21 CAvsCtrl, D21 CAIFNvsIFN, T21 CAIFNvsIFN, D21 CAIFNvsCtrl, T21 CAIFNvsCtrl]
